# Supplementary material
Source: PubMed Central journal article supplement (PMC3987808)
Supplement: NIHMS556674-supplement-Wagner_Sci_Sig_Suppl_Table_S5.pdf [file NIHMS556674-supplement-Wagner_Sci_Sig_Suppl_Table_S5.pdf]

**Table S5.** All discretized data used for network models.

| Time post-GF | 0 | 1 | 2 | 4 | 8 |
|--------------|---|---|---|---|---|
| PDPK1 sh4d   |   |   |   |   |   |
| EGFR Y845    | 3 | 3 | 2 | 3 | 2 |
| SHC          | 3 | 4 | 3 | 4 | 3 |
| c-Cbl        | 3 | 4 | 3 | 3 | 2 |
| Paxillin     | 3 | 4 | 3 | 4 | 2 |
| AKT          | 1 | 1 | 2 | 2 | 1 |
| GSK3         | 1 | 1 | 1 | 1 | 1 |
| S6 (S235)    | 1 | 1 | 1 | 1 | 1 |
| S6 (S240)    | 1 | 1 | 1 | 1 | 1 |
| PKCb         | 3 | 3 | 4 | 3 | 3 |
| PKCd         | 3 | 3 | 3 | 3 | 3 |
| MARCKS       | 3 | 4 | 3 | 4 | 2 |
| CaM          | 3 | 3 | 3 | 3 | 2 |
| RSK3         | 2 | 2 | 3 | 3 | 2 |
| RAF          | 3 | 4 | 3 | 3 | 2 |
| MEK          | 3 | 3 | 4 | 3 | 3 |
| ERK          | 3 | 3 | 4 | 4 | 3 |
| p90RSK       | 3 | 2 | 3 | 4 | 4 |
| STAT1        | 2 | 3 | 2 | 2 | 2 |
| STAT3        | 2 | 3 | 2 | 3 | 2 |
| CREB         | 2 | 3 | 3 | 3 | 3 |
| NF-kB        | 3 | 2 | 2 | 2 | 2 |
| c-Jun        | 2 | 3 | 2 | 2 | 2 |

|            |   |   |   |   |   |
|------------|---|---|---|---|---|
| PDPK1 sh10 |   |   |   |   |   |
| EGFR Y845  | 4 | 4 | 3 | 4 | 4 |
| SHC        | 4 | 4 | 3 | 4 | 4 |
| c-Cbl      | 4 | 4 | 4 | 4 | 4 |
| Paxillin   | 4 | 4 | 4 | 4 | 4 |
| AKT        | 1 | 1 | 2 | 2 | 2 |
| GSK3       | 1 | 1 | 1 | 1 | 2 |
| S6 (S235)  | 1 | 1 | 1 | 1 | 1 |
| S6 (S240)  | 1 | 1 | 1 | 1 | 1 |
| PKCb       | 4 | 3 | 4 | 3 | 4 |
| PKCd       | 4 | 4 | 4 | 4 | 4 |
| MARCKS     | 3 | 4 | 4 | 4 | 4 |
| CaM        | 3 | 4 | 3 | 3 | 3 |
| RSK3       | 3 | 3 | 4 | 3 | 3 |
| RAF        | 4 | 4 | 4 | 3 | 4 |
| MEK        | 4 | 3 | 4 | 4 | 4 |
| ERK        | 4 | 3 | 4 | 4 | 4 |
| p90RSK     | 4 | 2 | 3 | 4 | 3 |
| STAT1      | 4 | 4 | 3 | 3 | 4 |
| STAT3      | 4 | 4 | 4 | 3 | 4 |

|       |   |   |   |   |   |
|-------|---|---|---|---|---|
| CREB  | 3 | 4 | 4 | 4 | 4 |
| NF-kB | 3 | 2 | 3 | 2 | 3 |
| c-Jun | 3 | 3 | 3 | 2 | 3 |

PIK3CA sh5

|           |   |   |   |   |   |
|-----------|---|---|---|---|---|
| EGFR Y845 | 2 | 2 | 2 | 2 | 2 |
| SHC       | 3 | 4 | 2 | 3 | 3 |
| c-Cbl     | 4 | 4 | 2 | 2 | 2 |
| Paxillin  | 3 | 3 | 2 | 2 | 2 |
| AKT       | 1 | 1 | 1 | 1 | 1 |
| GSK3      | 1 | 1 | 1 | 1 | 1 |
| S6 (S235) | 3 | 2 | 4 | 2 | 2 |
| S6 (S240) | 3 | 3 | 4 | 3 | 3 |
| PKCb      | 3 | 3 | 3 | 2 | 2 |
| PKCd      | 4 | 4 | 3 | 3 | 3 |
| MARCKS    | 4 | 4 | 3 | 3 | 3 |
| CaM       | 4 | 4 | 2 | 2 | 2 |
| RSK3      | 3 | 2 | 2 | 2 | 2 |
| RAF       | 4 | 4 | 3 | 3 | 3 |
| MEK       | 3 | 2 | 3 | 2 | 2 |
| ERK       | 4 | 3 | 3 | 3 | 3 |
| p90RSK    | 2 | 2 | 3 | 2 | 2 |
| STAT1     | 4 | 3 | 1 | 2 | 2 |
| STAT3     | 3 | 3 | 2 | 2 | 2 |
| CREB      | 2 | 3 | 2 | 2 | 2 |
| NF-kB     | 4 | 2 | 1 | 2 | 1 |
| c-Jun     | 2 | 3 | 2 | 1 | 1 |

PIK3CA sh6

|           |   |   |   |   |   |
|-----------|---|---|---|---|---|
| EGFR Y845 | 2 | 2 | 1 | 1 | 1 |
| SHC       | 3 | 2 | 2 | 3 | 2 |
| c-Cbl     | 2 | 2 | 1 | 1 | 1 |
| Paxillin  | 2 | 2 | 1 | 2 | 1 |
| AKT       | 1 | 1 | 1 | 1 | 1 |
| GSK3      | 1 | 1 | 1 | 1 | 1 |
| S6 (S235) | 1 | 1 | 2 | 1 | 1 |
| S6 (S240) | 2 | 1 | 2 | 1 | 1 |
| PKCb      | 2 | 2 | 3 | 2 | 2 |
| PKCd      | 4 | 3 | 3 | 3 | 3 |
| MARCKS    | 2 | 2 | 2 | 3 | 2 |
| CaM       | 3 | 3 | 2 | 2 | 2 |
| RSK3      | 2 | 2 | 1 | 2 | 1 |
| RAF       | 2 | 3 | 2 | 2 | 2 |
| MEK       | 2 | 2 | 2 | 2 | 2 |
| ERK       | 2 | 3 | 4 | 3 | 3 |

|        |   |   |   |   |   |
|--------|---|---|---|---|---|
| p90RSK | 3 | 3 | 4 | 4 | 3 |
| STAT1  | 4 | 3 | 2 | 2 | 2 |
| STAT3  | 4 | 4 | 2 | 3 | 2 |
| CREB   | 1 | 2 | 2 | 2 | 2 |
| NF-kB  | 2 | 1 | 1 | 2 | 1 |
| c-Jun  | 1 | 1 | 1 | 1 | 1 |

PIK3CB sh03

|           |   |   |   |   |   |
|-----------|---|---|---|---|---|
| EGFR Y845 | 3 | 3 | 1 | 2 | 1 |
| SHC       | 3 | 3 | 2 | 3 | 2 |
| c-Cbl     | 2 | 3 | 1 | 2 | 1 |
| Paxillin  | 3 | 3 | 1 | 2 | 2 |
| AKT       | 1 | 1 | 1 | 1 | 1 |
| GSK3      | 1 | 1 | 1 | 1 | 1 |
| S6 (S235) | 2 | 1 | 3 | 1 | 1 |
| S6 (S240) | 2 | 2 | 3 | 2 | 2 |
| PKCb      | 2 | 3 | 3 | 2 | 2 |
| PKCd      | 3 | 3 | 2 | 2 | 2 |
| MARCKS    | 3 | 4 | 2 | 2 | 2 |
| CaM       | 3 | 3 | 2 | 2 | 1 |
| RSK3      | 3 | 2 | 1 | 2 | 1 |
| RAF       | 3 | 4 | 2 | 2 | 2 |
| MEK       | 2 | 3 | 3 | 2 | 2 |
| ERK       | 3 | 3 | 3 | 2 | 2 |
| p90RSK    | 3 | 2 | 3 | 2 | 2 |
| STAT1     | 3 | 3 | 2 | 1 | 1 |
| STAT3     | 2 | 2 | 1 | 2 | 1 |
| CREB      | 2 | 3 | 1 | 1 | 1 |
| NF-kB     | 2 | 1 | 1 | 1 | 1 |
| c-Jun     | 1 | 2 | 1 | 1 | 1 |

PIK3CB sh16

|           |   |   |   |   |   |
|-----------|---|---|---|---|---|
| EGFR Y845 | 2 | 2 | 1 | 1 | 1 |
| SHC       | 2 | 2 | 1 | 2 | 2 |
| c-Cbl     | 2 | 2 | 1 | 1 | 1 |
| Paxillin  | 2 | 3 | 1 | 2 | 1 |
| AKT       | 1 | 1 | 1 | 1 | 1 |
| GSK3      | 1 | 1 | 1 | 1 | 1 |
| S6 (S235) | 3 | 2 | 3 | 1 | 1 |
| S6 (S240) | 3 | 2 | 2 | 2 | 2 |
| PKCb      | 2 | 2 | 2 | 2 | 2 |
| PKCd      | 3 | 3 | 2 | 2 | 2 |
| MARCKS    | 3 | 3 | 2 | 2 | 2 |
| CaM       | 3 | 3 | 2 | 2 | 1 |
| RSK3      | 3 | 2 | 2 | 2 | 1 |

|        |   |   |   |   |   |
|--------|---|---|---|---|---|
| RAF    | 3 | 3 | 2 | 2 | 2 |
| MEK    | 3 | 2 | 2 | 1 | 2 |
| ERK    | 2 | 2 | 2 | 2 | 2 |
| p90RSK | 3 | 2 | 3 | 2 | 2 |
| STAT1  | 2 | 2 | 1 | 1 | 1 |
| STAT3  | 2 | 2 | 1 | 1 | 1 |
| CREB   | 2 | 2 | 1 | 1 | 1 |
| NF-kB  | 2 | 1 | 1 | 1 | 1 |
| c-Jun  | 2 | 2 | 1 | 1 | 1 |

PI3K pool

|           |   |   |   |   |   |
|-----------|---|---|---|---|---|
| EGFR Y845 | 4 | 4 | 4 | 3 | 4 |
| SHC       | 4 | 4 | 3 | 4 | 3 |
| c-Cbl     | 4 | 4 | 4 | 4 | 4 |
| Paxillin  | 4 | 4 | 4 | 4 | 4 |
| AKT       | 1 | 1 | 1 | 1 | 1 |
| GSK3      | 1 | 1 | 1 | 1 | 2 |
| S6 (S235) | 2 | 3 | 3 | 1 | 2 |
| S6 (S240) | 1 | 1 | 3 | 1 | 2 |
| PKCb      | 4 | 4 | 4 | 3 | 4 |
| PKCd      | 4 | 3 | 3 | 3 | 3 |
| MARCKS    | 4 | 4 | 3 | 4 | 3 |
| CaM       | 3 | 3 | 3 | 3 | 3 |
| RSK3      | 4 | 4 | 4 | 4 | 4 |
| RAF       | 3 | 4 | 3 | 3 | 3 |
| MEK       | 3 | 4 | 4 | 3 | 4 |
| ERK       | 4 | 4 | 4 | 4 | 4 |
| p90RSK    | 1 | 2 | 4 | 3 | 3 |
| STAT1     | 3 | 3 | 3 | 2 | 3 |
| STAT3     | 4 | 4 | 3 | 3 | 3 |
| CREB      | 3 | 4 | 3 | 3 | 3 |
| NF-kB     | 3 | 2 | 2 | 2 | 3 |
| c-Jun     | 4 | 3 | 3 | 3 | 3 |

AKT1 sh1

|           |   |   |   |   |   |
|-----------|---|---|---|---|---|
| EGFR Y845 | 3 | 4 | 3 | 4 | 3 |
| SHC       | 4 | 4 | 4 | 4 | 3 |
| c-Cbl     | 3 | 4 | 3 | 3 | 2 |
| Paxillin  | 2 | 3 | 3 | 3 | 3 |
| AKT       | 1 | 1 | 1 | 1 | 1 |
| GSK3      | 1 | 1 | 1 | 1 | 1 |
| S6 (S235) | 2 | 1 | 4 | 2 | 3 |
| S6 (S240) | 3 | 1 | 4 | 2 | 3 |
| PKCb      | 3 | 3 | 3 | 3 | 3 |
| PKCd      | 4 | 4 | 3 | 3 | 3 |

|        |   |   |   |   |   |
|--------|---|---|---|---|---|
| MARCKS | 3 | 4 | 4 | 3 | 4 |
| CaM    | 3 | 3 | 2 | 3 | 3 |
| RSK3   | 3 | 2 | 2 | 2 | 2 |
| RAF    | 4 | 4 | 4 | 3 | 3 |
| MEK    | 4 | 3 | 4 | 3 | 4 |
| ERK    | 4 | 3 | 4 | 4 | 4 |
| p90RSK | 2 | 2 | 4 | 3 | 4 |
| STAT1  | 4 | 4 | 2 | 3 | 3 |
| STAT3  | 2 | 3 | 3 | 3 | 2 |
| CREB   | 3 | 4 | 3 | 3 | 3 |
| NF-kB  | 4 | 2 | 3 | 3 | 3 |
| c-Jun  | 3 | 3 | 2 | 2 | 2 |

AKT1 sh4

|           |   |   |   |   |   |
|-----------|---|---|---|---|---|
| EGFR Y845 | 3 | 2 | 1 | 1 | 1 |
| SHC       | 3 | 2 | 1 | 2 | 2 |
| c-Cbl     | 2 | 2 | 1 | 1 | 1 |
| Paxillin  | 1 | 3 | 1 | 1 | 1 |
| AKT       | 1 | 1 | 1 | 1 | 1 |
| GSK3      | 1 | 1 | 1 | 1 | 1 |
| S6 (S235) | 2 | 2 | 2 | 1 | 1 |
| S6 (S240) | 3 | 2 | 2 | 1 | 1 |
| PKCb      | 2 | 3 | 2 | 2 | 1 |
| PKCd      | 3 | 3 | 2 | 2 | 2 |
| MARCKS    | 3 | 4 | 2 | 2 | 2 |
| CaM       | 3 | 3 | 1 | 1 | 1 |
| RSK3      | 2 | 1 | 1 | 1 | 1 |
| RAF       | 2 | 3 | 2 | 2 | 2 |
| MEK       | 2 | 2 | 2 | 2 | 1 |
| ERK       | 3 | 3 | 2 | 2 | 2 |
| p90RSK    | 2 | 2 | 4 | 2 | 2 |
| STAT1     | 3 | 3 | 1 | 1 | 1 |
| STAT3     | 2 | 2 | 1 | 2 | 1 |
| CREB      | 2 | 3 | 1 | 1 | 1 |
| NF-kB     | 3 | 3 | 1 | 2 | 1 |
| c-Jun     | 1 | 2 | 1 | 1 | 1 |

AKT2 sh10

|           |   |   |   |   |   |
|-----------|---|---|---|---|---|
| EGFR Y845 | 2 | 3 | 2 | 1 | 2 |
| SHC       | 3 | 4 | 2 | 2 | 2 |
| c-Cbl     | 3 | 3 | 2 | 1 | 1 |
| Paxillin  | 2 | 3 | 2 | 1 | 1 |
| AKT       | 1 | 1 | 1 | 1 | 1 |
| GSK3      | 1 | 1 | 1 | 1 | 1 |
| S6 (S235) | 3 | 3 | 4 | 1 | 2 |

|           |   |   |   |   |   |
|-----------|---|---|---|---|---|
| S6 (S240) | 3 | 2 | 3 | 1 | 2 |
| PKCb      | 2 | 3 | 4 | 2 | 3 |
| PKCd      | 3 | 3 | 2 | 2 | 2 |
| MARCKS    | 3 | 4 | 2 | 2 | 2 |
| CaM       | 2 | 3 | 2 | 1 | 1 |
| RSK3      | 3 | 3 | 3 | 2 | 2 |
| RAF       | 3 | 3 | 2 | 2 | 2 |
| MEK       | 3 | 3 | 4 | 2 | 2 |
| ERK       | 2 | 2 | 3 | 2 | 2 |
| p90RSK    | 3 | 2 | 4 | 4 | 4 |
| STAT1     | 2 | 3 | 2 | 1 | 1 |
| STAT3     | 2 | 3 | 1 | 1 | 1 |
| CREB      | 2 | 3 | 2 | 2 | 2 |
| NF-kB     | 3 | 2 | 2 | 2 | 2 |
| c-Jun     | 3 | 3 | 2 | 1 | 2 |

AKT2 sh12

|           |   |   |   |   |   |
|-----------|---|---|---|---|---|
| EGFR Y845 | 3 | 2 | 1 | 1 | 1 |
| SHC       | 2 | 3 | 2 | 2 | 2 |
| c-Cbl     | 2 | 3 | 1 | 1 | 1 |
| Paxillin  | 2 | 2 | 1 | 1 | 1 |
| AKT       | 1 | 1 | 1 | 1 | 1 |
| GSK3      | 1 | 1 | 1 | 1 | 1 |
| S6 (S235) | 1 | 1 | 2 | 1 | 1 |
| S6 (S240) | 1 | 1 | 1 | 1 | 1 |
| PKCb      | 2 | 3 | 3 | 2 | 2 |
| PKCd      | 3 | 3 | 2 | 2 | 2 |
| MARCKS    | 2 | 3 | 2 | 2 | 2 |
| CaM       | 2 | 2 | 1 | 1 | 1 |
| RSK3      | 2 | 2 | 1 | 1 | 1 |
| RAF       | 2 | 3 | 2 | 2 | 2 |
| MEK       | 2 | 3 | 3 | 2 | 1 |
| ERK       | 3 | 3 | 2 | 2 | 1 |
| p90RSK    | 4 | 2 | 4 | 3 | 4 |
| STAT1     | 2 | 2 | 1 | 1 | 1 |
| STAT3     | 1 | 2 | 1 | 1 | 1 |
| CREB      | 2 | 3 | 2 | 2 | 1 |
| NF-kB     | 4 | 4 | 3 | 4 | 2 |
| c-Jun     | 1 | 2 | 1 | 1 | 1 |

AKT3 sh07

|           |   |   |   |   |   |
|-----------|---|---|---|---|---|
| EGFR Y845 | 3 | 2 | 2 | 2 | 1 |
| SHC       | 3 | 3 | 2 | 3 | 2 |
| c-Cbl     | 3 | 2 | 2 | 2 | 1 |
| Paxillin  | 2 | 2 | 2 | 3 | 1 |

|           |   |   |   |   |   |
|-----------|---|---|---|---|---|
| AKT       | 1 | 1 | 1 | 1 | 1 |
| GSK3      | 1 | 1 | 1 | 2 | 1 |
| S6 (S235) | 3 | 3 | 4 | 2 | 2 |
| S6 (S240) | 3 | 3 | 4 | 2 | 2 |
| PKCb      | 2 | 3 | 4 | 3 | 2 |
| PKCd      | 3 | 2 | 2 | 2 | 2 |
| MARCKS    | 2 | 3 | 2 | 2 | 2 |
| CaM       | 3 | 2 | 2 | 2 | 1 |
| RSK3      | 3 | 3 | 2 | 2 | 1 |
| RAF       | 3 | 3 | 3 | 2 | 2 |
| MEK       | 2 | 3 | 4 | 4 | 2 |
| ERK       | 2 | 3 | 4 | 3 | 2 |
| p90RSK    | 3 | 2 | 4 | 4 | 4 |
| STAT1     | 2 | 2 | 2 | 2 | 1 |
| STAT3     | 1 | 2 | 1 | 1 | 1 |
| CREB      | 1 | 2 | 2 | 2 | 1 |
| NF-kB     | 3 | 2 | 2 | 3 | 1 |
| c-Jun     | 3 | 3 | 2 | 2 | 2 |

AKT3 sh09

|           |   |   |   |   |   |
|-----------|---|---|---|---|---|
| EGFR Y845 | 4 | 3 | 2 | 3 | 2 |
| SHC       | 3 | 3 | 3 | 3 | 2 |
| c-Cbl     | 3 | 2 | 2 | 2 | 1 |
| Paxillin  | 3 | 3 | 2 | 2 | 1 |
| AKT       | 1 | 1 | 1 | 1 | 1 |
| GSK3      | 1 | 1 | 1 | 1 | 1 |
| S6 (S235) | 1 | 1 | 3 | 1 | 1 |
| S6 (S240) | 1 | 1 | 2 | 1 | 1 |
| PKCb      | 3 | 3 | 4 | 3 | 2 |
| PKCd      | 3 | 3 | 2 | 2 | 2 |
| MARCKS    | 2 | 2 | 2 | 2 | 2 |
| CaM       | 3 | 3 | 2 | 2 | 1 |
| RSK3      | 3 | 4 | 4 | 3 | 1 |
| RAF       | 3 | 3 | 3 | 2 | 2 |
| MEK       | 2 | 2 | 4 | 2 | 2 |
| ERK       | 2 | 3 | 4 | 3 | 2 |
| p90RSK    | 2 | 2 | 4 | 4 | 4 |
| STAT1     | 2 | 3 | 2 | 2 | 1 |
| STAT3     | 2 | 2 | 2 | 2 | 1 |
| CREB      | 2 | 3 | 3 | 3 | 2 |
| NF-kB     | 2 | 2 | 2 | 2 | 1 |
| c-Jun     | 2 | 2 | 2 | 2 | 1 |

AKT pool

|           |   |   |   |   |   |
|-----------|---|---|---|---|---|
| EGFR Y845 | 3 | 4 | 3 | 4 | 4 |
|-----------|---|---|---|---|---|

|           |   |   |   |   |   |
|-----------|---|---|---|---|---|
| SHC       | 4 | 3 | 4 | 4 | 4 |
| c-Cbl     | 3 | 4 | 3 | 3 | 3 |
| Paxillin  | 3 | 4 | 4 | 4 | 4 |
| AKT       | 1 | 1 | 1 | 1 | 1 |
| GSK3      | 1 | 1 | 1 | 1 | 2 |
| S6 (S235) | 2 | 2 | 3 | 1 | 3 |
| S6 (S240) | 2 | 1 | 3 | 2 | 2 |
| PKCb      | 3 | 4 | 4 | 4 | 4 |
| PKCd      | 3 | 3 | 3 | 3 | 4 |
| MARCKS    | 4 | 4 | 4 | 4 | 4 |
| CaM       | 3 | 3 | 3 | 3 | 3 |
| RSK3      | 4 | 4 | 4 | 4 | 4 |
| RAF       | 3 | 3 | 4 | 3 | 3 |
| MEK       | 2 | 4 | 4 | 3 | 4 |
| ERK       | 2 | 4 | 4 | 3 | 4 |
| p90RSK    | 1 | 2 | 4 | 3 | 3 |
| STAT1     | 2 | 4 | 3 | 3 | 2 |
| STAT3     | 3 | 3 | 3 | 4 | 3 |
| CREB      | 3 | 4 | 3 | 3 | 4 |
| NF-kB     | 2 | 2 | 2 | 2 | 2 |
| c-Jun     | 3 | 3 | 3 | 3 | 3 |

GSK3-A sh3

|           |   |   |   |   |   |
|-----------|---|---|---|---|---|
| EGFR Y845 | 3 | 2 | 2 | 2 | 2 |
| SHC       | 3 | 2 | 2 | 3 | 3 |
| c-Cbl     | 2 | 1 | 1 | 1 | 2 |
| Paxillin  | 2 | 1 | 2 | 2 | 2 |
| AKT       | 2 | 2 | 3 | 3 | 3 |
| GSK3      | 1 | 1 | 1 | 1 | 1 |
| S6 (S235) | 1 | 1 | 2 | 1 | 1 |
| S6 (S240) | 1 | 1 | 1 | 1 | 1 |
| PKCb      | 2 | 2 | 2 | 2 | 2 |
| PKCd      | 2 | 2 | 2 | 2 | 2 |
| MARCKS    | 2 | 2 | 2 | 2 | 2 |
| CaM       | 3 | 2 | 2 | 1 | 2 |
| RSK3      | 2 | 1 | 1 | 1 | 1 |
| RAF       | 2 | 2 | 2 | 2 | 2 |
| MEK       | 2 | 1 | 3 | 2 | 2 |
| ERK       | 2 | 2 | 4 | 3 | 4 |
| p90RSK    | 3 | 2 | 2 | 2 | 2 |
| STAT1     | 1 | 2 | 2 | 1 | 1 |
| STAT3     | 2 | 2 | 2 | 2 | 2 |
| CREB      | 2 | 1 | 2 | 2 | 3 |
| NF-kB     | 3 | 1 | 2 | 2 | 2 |
| c-Jun     | 2 | 1 | 2 | 1 | 2 |

GSK3-A sh4

|           |   |   |   |   |   |
|-----------|---|---|---|---|---|
| EGFR Y845 | 3 | 4 | 2 | 3 | 3 |
| SHC       | 3 | 3 | 2 | 3 | 3 |
| c-Cbl     | 3 | 3 | 2 | 2 | 2 |
| Paxillin  | 3 | 3 | 2 | 2 | 2 |
| AKT       | 2 | 2 | 3 | 2 | 2 |
| GSK3      | 1 | 1 | 1 | 1 | 1 |
| S6 (S235) | 1 | 1 | 2 | 1 | 1 |
| S6 (S240) | 1 | 1 | 1 | 1 | 1 |
| PKCb      | 2 | 2 | 3 | 2 | 2 |
| PKCd      | 2 | 3 | 2 | 2 | 2 |
| MARCKS    | 2 | 2 | 2 | 2 | 2 |
| CaM       | 3 | 3 | 2 | 2 | 2 |
| RSK3      | 2 | 2 | 1 | 1 | 1 |
| RAF       | 2 | 3 | 2 | 2 | 2 |
| MEK       | 2 | 2 | 3 | 2 | 2 |
| ERK       | 3 | 3 | 4 | 3 | 3 |
| p90RSK    | 2 | 2 | 3 | 2 | 2 |
| STAT1     | 2 | 3 | 2 | 2 | 2 |
| STAT3     | 2 | 2 | 2 | 2 | 2 |
| CREB      | 2 | 2 | 2 | 2 | 3 |
| NF-kB     | 3 | 3 | 3 | 3 | 2 |
| c-Jun     | 2 | 3 | 2 | 2 | 2 |

GSK3-B sh12

|           |   |   |   |   |   |
|-----------|---|---|---|---|---|
| EGFR Y845 | 3 | 4 | 3 | 3 | 4 |
| SHC       | 3 | 4 | 3 | 4 | 4 |
| c-Cbl     | 4 | 4 | 2 | 3 | 3 |
| Paxillin  | 2 | 3 | 3 | 3 | 3 |
| AKT       | 3 | 3 | 4 | 3 | 3 |
| GSK3      | 1 | 1 | 1 | 1 | 1 |
| S6 (S235) | 1 | 1 | 2 | 1 | 2 |
| S6 (S240) | 1 | 1 | 1 | 1 | 2 |
| PKCb      | 4 | 3 | 3 | 3 | 4 |
| PKCd      | 4 | 4 | 3 | 4 | 4 |
| MARCKS    | 3 | 4 | 3 | 3 | 4 |
| CaM       | 3 | 3 | 2 | 3 | 3 |
| RSK3      | 3 | 2 | 3 | 2 | 3 |
| RAF       | 4 | 4 | 3 | 3 | 3 |
| MEK       | 3 | 2 | 4 | 3 | 4 |
| ERK       | 4 | 2 | 4 | 3 | 4 |
| p90RSK    | 4 | 2 | 3 | 4 | 3 |
| STAT1     | 3 | 4 | 3 | 3 | 3 |
| STAT3     | 2 | 3 | 2 | 3 | 3 |
| CREB      | 3 | 3 | 2 | 2 | 3 |
| NF-kB     | 4 | 3 | 3 | 3 | 4 |

|       |   |   |   |   |   |
|-------|---|---|---|---|---|
| c-Jun | 4 | 4 | 3 | 2 | 3 |
|-------|---|---|---|---|---|

GSK3-B sh7

|           |   |   |   |   |   |
|-----------|---|---|---|---|---|
| EGFR Y845 | 4 | 4 | 2 | 4 | 4 |
| SHC       | 4 | 4 | 3 | 4 | 4 |
| c-Cbl     | 3 | 4 | 3 | 3 | 4 |
| Paxillin  | 2 | 3 | 3 | 3 | 3 |
| AKT       | 4 | 4 | 4 | 4 | 4 |
| GSK3      | 2 | 1 | 2 | 2 | 2 |
| S6 (S235) | 1 | 1 | 2 | 1 | 2 |
| S6 (S240) | 2 | 1 | 2 | 2 | 2 |
| PKCb      | 3 | 3 | 3 | 2 | 3 |
| PKCd      | 4 | 4 | 4 | 4 | 4 |
| MARCKS    | 3 | 4 | 3 | 4 | 4 |
| CaM       | 4 | 4 | 3 | 3 | 4 |
| RSK3      | 2 | 2 | 2 | 2 | 2 |
| RAF       | 3 | 4 | 3 | 3 | 3 |
| MEK       | 4 | 2 | 4 | 3 | 4 |
| ERK       | 4 | 3 | 4 | 3 | 4 |
| p90RSK    | 2 | 2 | 4 | 2 | 2 |
| STAT1     | 4 | 4 | 3 | 3 | 3 |
| STAT3     | 3 | 3 | 3 | 3 | 4 |
| CREB      | 2 | 4 | 2 | 2 | 3 |
| NF-kB     | 3 | 2 | 3 | 4 | 4 |
| c-Jun     | 2 | 3 | 2 | 2 | 3 |

GSK3 pool

|           |   |   |   |   |   |
|-----------|---|---|---|---|---|
| EGFR Y845 | 4 | 3 | 3 | 4 | 3 |
| SHC       | 4 | 3 | 3 | 4 | 4 |
| c-Cbl     | 4 | 3 | 2 | 3 | 3 |
| Paxillin  | 4 | 3 | 3 | 4 | 3 |
| AKT       | 4 | 3 | 4 | 3 | 4 |
| GSK3      | 2 | 2 | 2 | 2 | 2 |
| S6 (S235) | 1 | 1 | 2 | 1 | 1 |
| S6 (S240) | 1 | 2 | 3 | 1 | 2 |
| PKCb      | 4 | 3 | 3 | 2 | 3 |
| PKCd      | 3 | 3 | 3 | 3 | 3 |
| MARCKS    | 3 | 3 | 3 | 3 | 4 |
| CaM       | 3 | 4 | 4 | 3 | 4 |
| RSK3      | 3 | 2 | 2 | 2 | 2 |
| RAF       | 3 | 4 | 3 | 3 | 3 |
| MEK       | 3 | 2 | 3 | 2 | 3 |
| ERK       | 4 | 3 | 4 | 3 | 3 |
| p90RSK    | 2 | 2 | 3 | 2 | 2 |
| STAT1     | 4 | 4 | 3 | 3 | 3 |

|       |   |   |   |   |   |
|-------|---|---|---|---|---|
| STAT3 | 4 | 4 | 3 | 4 | 4 |
| CREB  | 3 | 2 | 2 | 2 | 3 |
| NF-kB | 4 | 2 | 2 | 3 | 3 |
| c-Jun | 4 | 3 | 2 | 2 | 2 |

HRAS sh12

|           |   |   |   |   |   |
|-----------|---|---|---|---|---|
| EGFR Y845 | 2 | 3 | 1 | 2 | 2 |
| SHC       | 2 | 3 | 1 | 2 | 3 |
| c-Cbl     | 2 | 3 | 1 | 1 | 2 |
| Paxillin  | 1 | 2 | 1 | 1 | 2 |
| AKT       | 3 | 4 | 3 | 3 | 3 |
| GSK3      | 3 | 4 | 2 | 2 | 3 |
| S6 (S235) | 2 | 2 | 1 | 1 | 1 |
| S6 (S240) | 2 | 2 | 2 | 1 | 1 |
| PKCb      | 2 | 2 | 2 | 2 | 2 |
| PKCd      | 2 | 3 | 2 | 3 | 3 |
| MARCKS    | 2 | 3 | 2 | 2 | 2 |
| CaM       | 2 | 2 | 1 | 2 | 2 |
| RSK3      | 1 | 2 | 1 | 1 | 1 |
| RAF       | 2 | 3 | 2 | 2 | 2 |
| MEK       | 2 | 2 | 2 | 2 | 2 |
| ERK       | 2 | 3 | 2 | 2 | 2 |
| p90RSK    | 4 | 2 | 3 | 2 | 2 |
| STAT1     | 2 | 2 | 1 | 1 | 2 |
| STAT3     | 2 | 3 | 1 | 1 | 2 |
| CREB      | 1 | 3 | 1 | 2 | 3 |
| NF-kB     | 2 | 2 | 1 | 2 | 2 |
| c-Jun     | 1 | 2 | 1 | 1 | 1 |

HRAS sh9

|           |   |   |   |   |   |
|-----------|---|---|---|---|---|
| EGFR Y845 | 2 | 3 | 1 | 2 | 2 |
| SHC       | 2 | 3 | 2 | 3 | 3 |
| c-Cbl     | 2 | 3 | 1 | 2 | 2 |
| Paxillin  | 1 | 3 | 1 | 2 | 2 |
| AKT       | 3 | 4 | 4 | 4 | 3 |
| GSK3      | 3 | 4 | 4 | 3 | 4 |
| S6 (S235) | 3 | 3 | 3 | 1 | 2 |
| S6 (S240) | 3 | 2 | 2 | 1 | 2 |
| PKCb      | 2 | 2 | 2 | 2 | 3 |
| PKCd      | 3 | 3 | 2 | 3 | 3 |
| MARCKS    | 2 | 3 | 2 | 2 | 2 |
| CaM       | 2 | 2 | 1 | 2 | 2 |
| RSK3      | 1 | 2 | 1 | 1 | 2 |
| RAF       | 2 | 3 | 2 | 2 | 2 |
| MEK       | 2 | 2 | 2 | 2 | 2 |

|        |   |   |   |   |   |
|--------|---|---|---|---|---|
| ERK    | 2 | 3 | 4 | 3 | 3 |
| p90RSK | 3 | 1 | 3 | 2 | 3 |
| STAT1  | 2 | 2 | 1 | 2 | 2 |
| STAT3  | 1 | 2 | 1 | 2 | 2 |
| CREB   | 1 | 3 | 2 | 3 | 3 |
| NF-kB  | 2 | 2 | 1 | 2 | 3 |
| c-Jun  | 1 | 3 | 1 | 1 | 2 |

KRAS sh3

|           |   |   |   |   |   |
|-----------|---|---|---|---|---|
| EGFR Y845 | 2 | 2 | 1 | 1 | 1 |
| SHC       | 2 | 2 | 1 | 2 | 2 |
| c-Cbl     | 1 | 2 | 1 | 1 | 1 |
| Paxillin  | 1 | 2 | 1 | 1 | 1 |
| AKT       | 1 | 3 | 2 | 2 | 2 |
| GSK3      | 2 | 3 | 2 | 2 | 2 |
| S6 (S235) | 1 | 2 | 2 | 1 | 1 |
| S6 (S240) | 1 | 1 | 1 | 1 | 1 |
| PKCb      | 2 | 2 | 2 | 2 | 2 |
| PKCd      | 2 | 3 | 2 | 2 | 2 |
| MARCKS    | 2 | 3 | 2 | 2 | 2 |
| CaM       | 2 | 2 | 1 | 1 | 1 |
| RSK3      | 1 | 2 | 1 | 1 | 1 |
| RAF       | 2 | 2 | 2 | 2 | 2 |
| MEK       | 2 | 3 | 3 | 2 | 2 |
| ERK       | 2 | 3 | 2 | 2 | 2 |
| p90RSK    | 3 | 2 | 4 | 3 | 3 |
| STAT1     | 1 | 2 | 1 | 1 | 1 |
| STAT3     | 1 | 2 | 1 | 1 | 1 |
| CREB      | 1 | 2 | 1 | 1 | 1 |
| NF-kB     | 3 | 3 | 2 | 2 | 2 |
| c-Jun     | 2 | 3 | 1 | 1 | 2 |

KRAS sh5

|           |   |   |   |   |   |
|-----------|---|---|---|---|---|
| EGFR Y845 | 4 | 4 | 4 | 4 | 4 |
| SHC       | 4 | 4 | 3 | 4 | 4 |
| c-Cbl     | 3 | 4 | 3 | 4 | 4 |
| Paxillin  | 3 | 4 | 3 | 4 | 4 |
| AKT       | 3 | 3 | 4 | 3 | 4 |
| GSK3      | 3 | 3 | 3 | 3 | 3 |
| S6 (S235) | 2 | 2 | 3 | 1 | 2 |
| S6 (S240) | 2 | 1 | 3 | 2 | 3 |
| PKCb      | 3 | 2 | 3 | 3 | 3 |
| PKCd      | 4 | 3 | 3 | 4 | 4 |
| MARCKS    | 2 | 3 | 3 | 3 | 3 |
| CaM       | 3 | 3 | 3 | 3 | 3 |

|        |   |   |   |   |   |
|--------|---|---|---|---|---|
| RSK3   | 3 | 3 | 3 | 3 | 3 |
| RAF    | 4 | 3 | 3 | 3 | 3 |
| MEK    | 2 | 2 | 3 | 3 | 3 |
| ERK    | 2 | 3 | 4 | 3 | 3 |
| p90RSK | 3 | 2 | 3 | 2 | 3 |
| STAT1  | 4 | 4 | 3 | 3 | 3 |
| STAT3  | 3 | 3 | 2 | 4 | 4 |
| CREB   | 3 | 3 | 3 | 3 | 4 |
| NF-kB  | 3 | 1 | 2 | 2 | 3 |
| c-Jun  | 2 | 3 | 2 | 3 | 3 |

RAS pool

|           |   |   |   |   |   |
|-----------|---|---|---|---|---|
| EGFR Y845 | 3 | 2 | 2 | 3 | 2 |
| SHC       | 3 | 3 | 2 | 4 | 3 |
| c-Cbl     | 3 | 2 | 2 | 3 | 2 |
| Paxillin  | 3 | 3 | 3 | 4 | 3 |
| AKT       | 4 | 4 | 4 | 4 | 4 |
| GSK3      | 4 | 3 | 3 | 3 | 3 |
| S6 (S235) | 3 | 3 | 3 | 1 | 2 |
| S6 (S240) | 2 | 2 | 3 | 2 | 2 |
| PKCb      | 3 | 3 | 3 | 3 | 3 |
| PKCd      | 3 | 3 | 3 | 3 | 3 |
| MARCKS    | 3 | 3 | 3 | 3 | 3 |
| CaM       | 2 | 3 | 2 | 3 | 2 |
| RSK3      | 3 | 2 | 2 | 2 | 2 |
| RAF       | 3 | 3 | 3 | 3 | 2 |
| MEK       | 4 | 2 | 2 | 2 | 2 |
| ERK       | 3 | 3 | 3 | 3 | 2 |
| p90RSK    | 2 | 3 | 4 | 2 | 2 |
| STAT1     | 2 | 3 | 2 | 2 | 2 |
| STAT3     | 3 | 4 | 3 | 3 | 3 |
| CREB      | 3 | 3 | 2 | 3 | 3 |
| NF-kB     | 2 | 2 | 1 | 2 | 2 |
| c-Jun     | 3 | 2 | 2 | 2 | 2 |

A-RAF sh1

|           |   |   |   |   |   |
|-----------|---|---|---|---|---|
| EGFR Y845 | 4 | 3 | 2 | 2 | 2 |
| SHC       | 4 | 4 | 3 | 3 | 3 |
| c-Cbl     | 4 | 4 | 2 | 3 | 3 |
| Paxillin  | 3 | 4 | 2 | 2 | 2 |
| AKT       | 4 | 4 | 4 | 4 | 3 |
| GSK3      | 4 | 4 | 4 | 4 | 3 |
| S6 (S235) | 2 | 2 | 3 | 1 | 2 |
| S6 (S240) | 2 | 1 | 2 | 2 | 2 |
| PKCb      | 3 | 3 | 3 | 3 | 3 |

|        |   |   |   |   |   |
|--------|---|---|---|---|---|
| PKCd   | 4 | 4 | 2 | 3 | 3 |
| MARCKS | 4 | 4 | 3 | 4 | 3 |
| CaM    | 3 | 3 | 2 | 2 | 2 |
| RSK3   | 3 | 3 | 2 | 3 | 2 |
| RAF    | 1 | 1 | 1 | 1 | 1 |
| MEK    | 1 | 1 | 2 | 2 | 1 |
| ERK    | 1 | 2 | 2 | 2 | 2 |
| p90RSK | 2 | 1 | 2 | 1 | 2 |
| STAT1  | 3 | 4 | 2 | 2 | 2 |
| STAT3  | 2 | 3 | 2 | 3 | 2 |
| CREB   | 2 | 3 | 2 | 3 | 2 |
| NF-kB  | 4 | 3 | 2 | 3 | 2 |
| c-Jun  | 3 | 3 | 2 | 2 | 2 |

A-RAF sh4

|           |   |   |   |   |   |
|-----------|---|---|---|---|---|
| EGFR Y845 | 4 | 3 | 2 | 3 | 2 |
| SHC       | 4 | 4 | 2 | 3 | 3 |
| c-Cbl     | 3 | 4 | 2 | 2 | 1 |
| Paxillin  | 3 | 3 | 1 | 2 | 1 |
| AKT       | 4 | 4 | 3 | 3 | 2 |
| GSK3      | 4 | 4 | 3 | 3 | 2 |
| S6 (S235) | 3 | 2 | 4 | 2 | 2 |
| S6 (S240) | 3 | 2 | 4 | 2 | 2 |
| PKCb      | 3 | 3 | 3 | 2 | 2 |
| PKCd      | 4 | 4 | 3 | 3 | 2 |
| MARCKS    | 2 | 3 | 2 | 2 | 2 |
| CaM       | 4 | 4 | 2 | 3 | 2 |
| RSK3      | 3 | 3 | 2 | 2 | 2 |
| RAF       | 1 | 1 | 1 | 1 | 1 |
| MEK       | 1 | 1 | 1 | 1 | 1 |
| ERK       | 1 | 1 | 1 | 1 | 1 |
| p90RSK    | 1 | 1 | 1 | 1 | 1 |
| STAT1     | 4 | 3 | 2 | 2 | 2 |
| STAT3     | 4 | 4 | 1 | 3 | 2 |
| CREB      | 2 | 3 | 2 | 2 | 1 |
| NF-kB     | 4 | 3 | 2 | 3 | 2 |
| c-Jun     | 2 | 2 | 1 | 1 | 1 |

B-RAF sh1

|           |   |   |   |   |   |
|-----------|---|---|---|---|---|
| EGFR Y845 | 3 | 3 | 1 | 2 | 2 |
| SHC       | 4 | 3 | 2 | 3 | 3 |
| c-Cbl     | 4 | 4 | 3 | 1 | 3 |
| Paxillin  | 3 | 4 | 3 | 3 | 3 |
| AKT       | 4 | 3 | 4 | 3 | 4 |
| GSK3      | 4 | 4 | 4 | 4 | 4 |

|           |   |   |   |   |   |
|-----------|---|---|---|---|---|
| S6 (S235) | 3 | 2 | 4 | 2 | 3 |
| S6 (S240) | 3 | 2 | 3 | 2 | 3 |
| PKCb      | 3 | 3 | 4 | 3 | 4 |
| PKCd      | 3 | 3 | 2 | 3 | 2 |
| MARCKS    | 3 | 4 | 3 | 3 | 3 |
| CaM       | 3 | 3 | 2 | 2 | 2 |
| RSK3      | 4 | 4 | 4 | 3 | 3 |
| RAF       | 1 | 1 | 1 | 1 | 1 |
| MEK       | 1 | 1 | 2 | 1 | 1 |
| ERK       | 1 | 2 | 2 | 2 | 2 |
| p90RSK    | 2 | 1 | 2 | 2 | 2 |
| STAT1     | 3 | 2 | 2 | 2 | 2 |
| STAT3     | 3 | 2 | 2 | 2 | 2 |
| CREB      | 2 | 3 | 2 | 3 | 3 |
| NF-kB     | 3 | 3 | 3 | 3 | 2 |
| c-Jun     | 3 | 3 | 2 | 2 | 2 |

B-RAF sh4

|           |   |   |   |   |   |
|-----------|---|---|---|---|---|
| EGFR Y845 | 4 | 4 | 2 | 3 | 2 |
| SHC       | 4 | 4 | 3 | 4 | 3 |
| c-Cbl     | 4 | 4 | 2 | 3 | 2 |
| Paxillin  | 4 | 4 | 2 | 4 | 3 |
| AKT       | 4 | 3 | 4 | 3 | 3 |
| GSK3      | 4 | 4 | 4 | 4 | 3 |
| S6 (S235) | 2 | 1 | 4 | 2 | 3 |
| S6 (S240) | 2 | 1 | 4 | 3 | 3 |
| PKCb      | 3 | 3 | 4 | 3 | 3 |
| PKCd      | 4 | 4 | 3 | 3 | 3 |
| MARCKS    | 3 | 4 | 3 | 4 | 3 |
| CaM       | 3 | 3 | 3 | 3 | 2 |
| RSK3      | 3 | 2 | 3 | 3 | 2 |
| RAF       | 1 | 1 | 1 | 1 | 1 |
| MEK       | 1 | 1 | 1 | 1 | 1 |
| ERK       | 1 | 1 | 2 | 1 | 1 |
| p90RSK    | 2 | 1 | 1 | 1 | 2 |
| STAT1     | 3 | 3 | 2 | 2 | 2 |
| STAT3     | 3 | 4 | 2 | 2 | 2 |
| CREB      | 3 | 3 | 3 | 3 | 3 |
| NF-kB     | 4 | 2 | 3 | 3 | 2 |
| c-Jun     | 3 | 3 | 2 | 2 | 2 |

C-RAF sh3

|           |   |   |   |   |   |
|-----------|---|---|---|---|---|
| EGFR Y845 | 4 | 4 | 2 | 3 | 3 |
| SHC       | 3 | 4 | 3 | 3 | 3 |
| c-Cbl     | 2 | 3 | 2 | 2 | 1 |

|           |   |   |   |   |   |
|-----------|---|---|---|---|---|
| Paxillin  | 2 | 3 | 2 | 2 | 2 |
| AKT       | 4 | 3 | 4 | 3 | 3 |
| GSK3      | 4 | 4 | 4 | 3 | 3 |
| S6 (S235) | 2 | 2 | 3 | 1 | 2 |
| S6 (S240) | 2 | 1 | 3 | 1 | 2 |
| PKCb      | 3 | 3 | 4 | 4 | 4 |
| PKCd      | 3 | 3 | 3 | 3 | 2 |
| MARCKS    | 2 | 3 | 2 | 2 | 2 |
| CaM       | 3 | 3 | 2 | 3 | 2 |
| RSK3      | 2 | 3 | 3 | 3 | 2 |
| RAF       | 1 | 1 | 1 | 1 | 1 |
| MEK       | 1 | 1 | 2 | 1 | 1 |
| ERK       | 1 | 1 | 2 | 1 | 1 |
| p90RSK    | 2 | 1 | 2 | 1 | 2 |
| STAT1     | 3 | 3 | 2 | 2 | 2 |
| STAT3     | 2 | 3 | 2 | 2 | 1 |
| CREB      | 3 | 4 | 3 | 3 | 3 |
| NF-kB     | 3 | 2 | 2 | 2 | 2 |
| c-Jun     | 2 | 3 | 2 | 2 | 1 |

C-RAF sh5

|           |   |   |   |   |   |
|-----------|---|---|---|---|---|
| EGFR Y845 | 1 | 2 | 1 | 1 | 1 |
| SHC       | 2 | 2 | 2 | 2 | 2 |
| c-Cbl     | 2 | 2 | 1 | 1 | 1 |
| Paxillin  | 1 | 2 | 1 | 1 | 1 |
| AKT       | 2 | 2 | 2 | 2 | 2 |
| GSK3      | 2 | 3 | 3 | 2 | 2 |
| S6 (S235) | 2 | 2 | 2 | 1 | 1 |
| S6 (S240) | 2 | 2 | 2 | 1 | 1 |
| PKCb      | 2 | 2 | 2 | 1 | 1 |
| PKCd      | 2 | 2 | 2 | 2 | 2 |
| MARCKS    | 2 | 2 | 2 | 2 | 2 |
| CaM       | 2 | 2 | 1 | 1 | 1 |
| RSK3      | 1 | 1 | 1 | 1 | 1 |
| RAF       | 1 | 1 | 1 | 1 | 1 |
| MEK       | 1 | 1 | 1 | 1 | 1 |
| ERK       | 1 | 1 | 1 | 1 | 1 |
| p90RSK    | 1 | 1 | 1 | 1 | 1 |
| STAT1     | 1 | 2 | 1 | 1 | 1 |
| STAT3     | 1 | 2 | 1 | 1 | 1 |
| CREB      | 1 | 1 | 1 | 1 | 1 |
| NF-kB     | 2 | 1 | 1 | 1 | 1 |
| c-Jun     | 3 | 3 | 2 | 2 | 1 |

RAF pool

|           |   |   |   |   |   |
|-----------|---|---|---|---|---|
| EGFR Y845 | 2 | 2 | 2 | 3 | 3 |
| SHC       | 3 | 2 | 2 | 3 | 3 |
| c-Cbl     | 3 | 3 | 3 | 3 | 4 |
| Paxillin  | 3 | 3 | 3 | 4 | 4 |
| AKT       | 3 | 3 | 3 | 4 | 4 |
| GSK3      | 3 | 4 | 4 | 4 | 4 |
| S6 (S235) | 2 | 2 | 3 | 1 | 2 |
| S6 (S240) | 2 | 1 | 3 | 1 | 2 |
| PKCb      | 4 | 3 | 3 | 3 | 3 |
| PKCd      | 3 | 2 | 3 | 3 | 3 |
| MARCKS    | 2 | 2 | 3 | 3 | 2 |
| CaM       | 2 | 3 | 3 | 3 | 3 |
| RSK3      | 4 | 4 | 3 | 4 | 4 |
| RAF       | 1 | 1 | 1 | 1 | 1 |
| MEK       | 1 | 1 | 1 | 1 | 1 |
| ERK       | 1 | 1 | 1 | 1 | 1 |
| p90RSK    | 1 | 1 | 1 | 1 | 1 |
| STAT1     | 2 | 2 | 2 | 2 | 2 |
| STAT3     | 3 | 3 | 3 | 3 | 3 |
| CREB      | 2 | 2 | 2 | 2 | 3 |
| NF-kB     | 3 | 3 | 3 | 3 | 3 |
| c-Jun     | 3 | 3 | 3 | 3 | 3 |

MEK1 sh1

|           |   |   |   |   |   |
|-----------|---|---|---|---|---|
| EGFR Y845 | 4 | 4 | 3 | 4 | 4 |
| SHC       | 4 | 4 | 3 | 4 | 4 |
| c-Cbl     | 4 | 4 | 3 | 3 | 4 |
| Paxillin  | 3 | 4 | 3 | 3 | 4 |
| AKT       | 4 | 4 | 4 | 4 | 4 |
| GSK3      | 4 | 4 | 4 | 4 | 4 |
| S6 (S235) | 1 | 1 | 3 | 1 | 2 |
| S6 (S240) | 1 | 1 | 2 | 1 | 2 |
| PKCb      | 4 | 2 | 3 | 3 | 4 |
| PKCd      | 4 | 4 | 3 | 4 | 4 |
| MARCKS    | 3 | 4 | 3 | 4 | 4 |
| CaM       | 3 | 3 | 3 | 3 | 3 |
| RSK3      | 3 | 3 | 4 | 3 | 4 |
| RAF       | 4 | 4 | 4 | 3 | 4 |
| MEK       | 1 | 1 | 1 | 1 | 1 |
| ERK       | 1 | 1 | 3 | 2 | 2 |
| p90RSK    | 2 | 1 | 1 | 1 | 1 |
| STAT1     | 3 | 4 | 3 | 3 | 4 |
| STAT3     | 3 | 3 | 2 | 2 | 4 |
| CREB      | 3 | 4 | 3 | 3 | 4 |
| NF-kB     | 4 | 3 | 4 | 4 | 4 |
| c-Jun     | 3 | 3 | 3 | 2 | 4 |

MEK1 sh4

|           |   |   |   |   |   |
|-----------|---|---|---|---|---|
| EGFR Y845 | 4 | 4 | 4 | 4 | 4 |
| SHC       | 4 | 4 | 3 | 4 | 4 |
| c-Cbl     | 3 | 4 | 3 | 4 | 4 |
| Paxillin  | 3 | 4 | 3 | 4 | 3 |
| AKT       | 4 | 4 | 4 | 4 | 4 |
| GSK3      | 4 | 4 | 4 | 4 | 4 |
| S6 (S235) | 1 | 1 | 3 | 1 | 2 |
| S6 (S240) | 1 | 1 | 3 | 2 | 3 |
| PKCb      | 4 | 3 | 3 | 3 | 4 |
| PKCd      | 4 | 4 | 4 | 4 | 4 |
| MARCKS    | 3 | 4 | 3 | 3 | 3 |
| CaM       | 4 | 4 | 4 | 4 | 4 |
| RSK3      | 3 | 2 | 2 | 3 | 3 |
| RAF       | 4 | 3 | 3 | 3 | 3 |
| MEK       | 1 | 1 | 1 | 1 | 1 |
| ERK       | 1 | 1 | 2 | 1 | 2 |
| p90RSK    | 1 | 1 | 1 | 1 | 1 |
| STAT1     | 4 | 4 | 4 | 4 | 4 |
| STAT3     | 4 | 4 | 3 | 4 | 4 |
| CREB      | 4 | 4 | 3 | 3 | 4 |
| NF-kB     | 3 | 2 | 3 | 3 | 4 |
| c-Jun     | 3 | 3 | 2 | 2 | 3 |

MEK2 sh4

|           |   |   |   |   |   |
|-----------|---|---|---|---|---|
| EGFR Y845 | 4 | 3 | 3 | 3 | 3 |
| SHC       | 3 | 4 | 3 | 4 | 4 |
| c-Cbl     | 3 | 4 | 3 | 3 | 4 |
| Paxillin  | 3 | 4 | 3 | 4 | 4 |
| AKT       | 3 | 3 | 4 | 4 | 3 |
| GSK3      | 3 | 4 | 4 | 4 | 4 |
| S6 (S235) | 2 | 1 | 3 | 2 | 3 |
| S6 (S240) | 2 | 1 | 3 | 3 | 3 |
| PKCb      | 3 | 3 | 3 | 2 | 3 |
| PKCd      | 4 | 4 | 4 | 4 | 4 |
| MARCKS    | 3 | 3 | 2 | 3 | 3 |
| CaM       | 4 | 3 | 3 | 3 | 3 |
| RSK3      | 4 | 2 | 2 | 2 | 3 |
| RAF       | 4 | 4 | 3 | 3 | 4 |
| MEK       | 4 | 3 | 4 | 4 | 4 |
| ERK       | 1 | 1 | 1 | 1 | 1 |
| p90RSK    | 2 | 1 | 1 | 1 | 1 |
| STAT1     | 4 | 4 | 3 | 3 | 3 |
| STAT3     | 2 | 4 | 3 | 3 | 3 |
| CREB      | 3 | 4 | 3 | 3 | 4 |

|       |   |   |   |   |   |
|-------|---|---|---|---|---|
| NF-kB | 4 | 3 | 4 | 4 | 4 |
| c-Jun | 3 | 4 | 3 | 3 | 4 |

MEK2 sh5

|           |   |   |   |   |   |
|-----------|---|---|---|---|---|
| EGFR Y845 | 3 | 3 | 3 | 4 | 3 |
| SHC       | 4 | 3 | 3 | 4 | 4 |
| c-Cbl     | 4 | 3 | 3 | 4 | 3 |
| Paxillin  | 4 | 4 | 4 | 4 | 4 |
| AKT       | 4 | 4 | 4 | 4 | 4 |
| GSK3      | 4 | 4 | 4 | 4 | 4 |
| S6 (S235) | 2 | 3 | 3 | 1 | 2 |
| S6 (S240) | 2 | 2 | 3 | 2 | 2 |
| PKCb      | 3 | 4 | 3 | 4 | 4 |
| PKCd      | 3 | 3 | 3 | 3 | 3 |
| MARCKS    | 3 | 4 | 3 | 4 | 3 |
| CaM       | 3 | 3 | 3 | 3 | 3 |
| RSK3      | 4 | 4 | 3 | 3 | 3 |
| RAF       | 3 | 3 | 3 | 3 | 3 |
| MEK       | 1 | 1 | 1 | 1 | 1 |
| ERK       | 1 | 2 | 2 | 2 | 2 |
| p90RSK    | 1 | 1 | 2 | 1 | 1 |
| STAT1     | 3 | 4 | 3 | 3 | 3 |
| STAT3     | 3 | 3 | 4 | 3 | 3 |
| CREB      | 2 | 3 | 2 | 3 | 3 |
| NF-kB     | 3 | 3 | 2 | 3 | 3 |
| c-Jun     | 4 | 4 | 3 | 4 | 3 |

MEK pool

|           |   |   |   |   |   |
|-----------|---|---|---|---|---|
| EGFR Y845 | 2 | 2 | 2 | 2 | 3 |
| SHC       | 3 | 3 | 2 | 3 | 3 |
| c-Cbl     | 2 | 2 | 2 | 2 | 2 |
| Paxillin  | 1 | 2 | 2 | 2 | 2 |
| AKT       | 3 | 4 | 4 | 3 | 3 |
| GSK3      | 3 | 4 | 4 | 3 | 3 |
| S6 (S235) | 2 | 2 | 3 | 1 | 2 |
| S6 (S240) | 2 | 2 | 3 | 1 | 2 |
| PKCb      | 2 | 2 | 3 | 2 | 3 |
| PKCd      | 4 | 3 | 3 | 3 | 3 |
| MARCKS    | 2 | 3 | 2 | 2 | 2 |
| CaM       | 3 | 3 | 2 | 2 | 2 |
| RSK3      | 1 | 1 | 1 | 1 | 2 |
| RAF       | 2 | 3 | 2 | 2 | 2 |
| MEK       | 2 | 2 | 3 | 2 | 2 |
| ERK       | 1 | 1 | 1 | 1 | 1 |
| p90RSK    | 1 | 1 | 1 | 1 | 1 |

|       |   |   |   |   |   |
|-------|---|---|---|---|---|
| STAT1 | 4 | 3 | 3 | 3 | 3 |
| STAT3 | 3 | 3 | 2 | 2 | 3 |
| CREB  | 1 | 2 | 2 | 2 | 3 |
| NF-kB | 2 | 2 | 3 | 3 | 3 |
| c-Jun | 2 | 3 | 2 | 2 | 2 |

MAPK1 sh2

|           |   |   |   |   |   |
|-----------|---|---|---|---|---|
| EGFR Y845 | 2 | 4 | 2 | 3 | 3 |
| SHC       | 2 | 4 | 3 | 3 | 3 |
| c-Cbl     | 3 | 4 | 2 | 2 | 2 |
| Paxillin  | 2 | 4 | 2 | 2 | 3 |
| AKT       | 2 | 3 | 3 | 2 | 3 |
| GSK3      | 3 | 4 | 3 | 3 | 4 |
| S6 (S235) | 2 | 2 | 3 | 1 | 2 |
| S6 (S240) | 2 | 2 | 2 | 1 | 2 |
| PKCb      | 3 | 2 | 3 | 2 | 3 |
| PKCd      | 3 | 3 | 2 | 3 | 3 |
| MARCKS    | 2 | 4 | 3 | 3 | 3 |
| CaM       | 2 | 2 | 2 | 2 | 2 |
| RSK3      | 3 | 3 | 2 | 2 | 2 |
| RAF       | 3 | 4 | 3 | 2 | 3 |
| MEK       | 1 | 1 | 2 | 1 | 2 |
| ERK       | 1 | 1 | 2 | 1 | 1 |
| p90RSK    | 2 | 1 | 1 | 1 | 1 |
| STAT1     | 2 | 3 | 2 | 2 | 2 |
| STAT3     | 2 | 2 | 2 | 2 | 1 |
| CREB      | 2 | 2 | 2 | 1 | 2 |
| NF-kB     | 2 | 1 | 2 | 2 | 2 |
| c-Jun     | 3 | 4 | 2 | 2 | 3 |

MAPK1 sh5

|           |   |   |   |   |   |
|-----------|---|---|---|---|---|
| EGFR Y845 | 4 | 4 | 3 | 4 | 4 |
| SHC       | 3 | 4 | 3 | 3 | 4 |
| c-Cbl     | 4 | 4 | 3 | 3 | 3 |
| Paxillin  | 3 | 4 | 3 | 3 | 4 |
| AKT       | 3 | 3 | 4 | 3 | 3 |
| GSK3      | 4 | 4 | 4 | 3 | 4 |
| S6 (S235) | 1 | 1 | 2 | 1 | 2 |
| S6 (S240) | 1 | 1 | 2 | 2 | 3 |
| PKCb      | 2 | 2 | 4 | 3 | 4 |
| PKCd      | 4 | 4 | 3 | 4 | 4 |
| MARCKS    | 3 | 3 | 3 | 3 | 3 |
| CaM       | 3 | 3 | 3 | 3 | 3 |
| RSK3      | 2 | 1 | 2 | 2 | 3 |
| RAF       | 4 | 4 | 3 | 2 | 4 |

|        |   |   |   |   |   |
|--------|---|---|---|---|---|
| MEK    | 1 | 1 | 2 | 1 | 2 |
| ERK    | 1 | 1 | 2 | 1 | 2 |
| p90RSK | 2 | 1 | 1 | 1 | 1 |
| STAT1  | 3 | 3 | 2 | 3 | 3 |
| STAT3  | 2 | 3 | 2 | 3 | 3 |
| CREB   | 2 | 3 | 3 | 3 | 4 |
| NF-kB  | 3 | 2 | 2 | 2 | 3 |
| c-Jun  | 3 | 3 | 2 | 2 | 3 |

MAPK3 sh1

|           |   |   |   |   |   |
|-----------|---|---|---|---|---|
| EGFR Y845 | 2 | 3 | 2 | 3 | 4 |
| SHC       | 3 | 3 | 2 | 3 | 3 |
| c-Cbl     | 3 | 4 | 2 | 3 | 2 |
| Paxillin  | 3 | 3 | 2 | 2 | 3 |
| AKT       | 3 | 4 | 4 | 3 | 3 |
| GSK3      | 3 | 4 | 4 | 3 | 4 |
| S6 (S235) | 1 | 2 | 2 | 1 | 2 |
| S6 (S240) | 1 | 1 | 2 | 1 | 1 |
| PKCb      | 2 | 2 | 3 | 2 | 3 |
| PKCd      | 3 | 3 | 2 | 3 | 3 |
| MARCKS    | 2 | 3 | 2 | 2 | 3 |
| CaM       | 3 | 3 | 2 | 2 | 3 |
| RSK3      | 3 | 4 | 3 | 3 | 4 |
| RAF       | 3 | 4 | 2 | 2 | 3 |
| MEK       | 2 | 2 | 3 | 2 | 3 |
| ERK       | 1 | 1 | 1 | 1 | 1 |
| p90RSK    | 1 | 1 | 1 | 1 | 1 |
| STAT1     | 3 | 3 | 2 | 2 | 2 |
| STAT3     | 2 | 2 | 1 | 2 | 3 |
| CREB      | 1 | 3 | 2 | 2 | 3 |
| NF-kB     | 3 | 2 | 2 | 2 | 3 |
| c-Jun     | 3 | 4 | 2 | 2 | 3 |

MAPK3 sh4

|           |   |   |   |   |   |
|-----------|---|---|---|---|---|
| EGFR Y845 | 3 | 4 | 3 | 4 | 4 |
| SHC       | 3 | 4 | 3 | 4 | 4 |
| c-Cbl     | 2 | 3 | 2 | 2 | 2 |
| Paxillin  | 2 | 3 | 2 | 2 | 2 |
| AKT       | 2 | 3 | 4 | 3 | 3 |
| GSK3      | 2 | 3 | 4 | 3 | 2 |
| S6 (S235) | 1 | 1 | 1 | 1 | 1 |
| S6 (S240) | 1 | 1 | 1 | 1 | 1 |
| PKCb      | 3 | 2 | 4 | 2 | 4 |
| PKCd      | 4 | 4 | 3 | 3 | 3 |
| MARCKS    | 2 | 3 | 2 | 2 | 2 |

|        |   |   |   |   |   |
|--------|---|---|---|---|---|
| CaM    | 3 | 3 | 3 | 3 | 3 |
| RSK3   | 3 | 2 | 3 | 3 | 2 |
| RAF    | 3 | 3 | 3 | 2 | 2 |
| MEK    | 3 | 2 | 4 | 3 | 3 |
| ERK    | 1 | 1 | 1 | 1 | 1 |
| p90RSK | 1 | 1 | 1 | 1 | 1 |
| STAT1  | 4 | 4 | 3 | 3 | 3 |
| STAT3  | 2 | 3 | 3 | 3 | 3 |
| CREB   | 2 | 4 | 3 | 3 | 3 |
| NF-kB  | 2 | 2 | 3 | 3 | 3 |
| c-Jun  | 2 | 3 | 2 | 2 | 2 |

ERK pool

|           |   |   |   |   |   |
|-----------|---|---|---|---|---|
| EGFR Y845 | 3 | 2 | 2 | 2 | 2 |
| SHC       | 3 | 3 | 2 | 3 | 3 |
| c-Cbl     | 3 | 3 | 3 | 3 | 3 |
| Paxillin  | 3 | 4 | 3 | 4 | 3 |
| AKT       | 3 | 2 | 3 | 3 | 4 |
| GSK3      | 3 | 3 | 3 | 3 | 3 |
| S6 (S235) | 2 | 3 | 3 | 1 | 2 |
| S6 (S240) | 2 | 2 | 3 | 2 | 2 |
| PKCb      | 4 | 3 | 3 | 2 | 2 |
| PKCd      | 3 | 3 | 3 | 3 | 3 |
| MARCKS    | 2 | 2 | 2 | 3 | 2 |
| CaM       | 2 | 2 | 2 | 3 | 2 |
| RSK3      | 3 | 3 | 2 | 3 | 3 |
| RAF       | 3 | 3 | 3 | 3 | 2 |
| MEK       | 3 | 3 | 3 | 3 | 4 |
| ERK       | 1 | 1 | 1 | 1 | 1 |
| p90RSK    | 1 | 1 | 1 | 1 | 1 |
| STAT1     | 2 | 3 | 2 | 2 | 2 |
| STAT3     | 4 | 3 | 2 | 3 | 3 |
| CREB      | 3 | 2 | 2 | 2 | 2 |
| NF-kB     | 3 | 3 | 2 | 2 | 3 |
| c-Jun     | 4 | 4 | 3 | 4 | 4 |

p90RSK sh1

|           |   |   |   |   |   |
|-----------|---|---|---|---|---|
| EGFR Y845 | 4 | 4 | 4 | 4 | 3 |
| SHC       | 3 | 4 | 4 | 4 | 4 |
| c-Cbl     | 4 | 4 | 3 | 4 | 2 |
| Paxillin  | 3 | 4 | 4 | 4 | 3 |
| AKT       | 3 | 3 | 3 | 3 | 2 |
| GSK3      | 4 | 4 | 3 | 3 | 3 |
| S6 (S235) | 1 | 1 | 2 | 1 | 2 |
| S6 (S240) | 1 | 1 | 1 | 1 | 2 |

|        |   |   |   |   |   |
|--------|---|---|---|---|---|
| PKCb   | 2 | 2 | 3 | 2 | 2 |
| PKCd   | 4 | 4 | 3 | 3 | 3 |
| MARCKS | 3 | 4 | 3 | 4 | 3 |
| CaM    | 3 | 3 | 3 | 3 | 3 |
| RSK3   | 4 | 3 | 4 | 4 | 4 |
| RAF    | 4 | 4 | 3 | 3 | 2 |
| MEK    | 3 | 2 | 4 | 3 | 3 |
| ERK    | 2 | 2 | 3 | 3 | 2 |
| p90RSK | 1 | 1 | 1 | 1 | 1 |
| STAT1  | 2 | 4 | 4 | 3 | 2 |
| STAT3  | 3 | 4 | 4 | 4 | 3 |
| CREB   | 3 | 4 | 4 | 3 | 3 |
| NF-kB  | 3 | 1 | 2 | 2 | 1 |
| c-Jun  | 3 | 3 | 3 | 3 | 2 |

p90RSK sh4

|           |   |   |   |   |   |
|-----------|---|---|---|---|---|
| EGFR Y845 | 3 | 4 | 3 | 4 | 2 |
| SHC       | 3 | 4 | 3 | 4 | 3 |
| c-Cbl     | 4 | 4 | 4 | 4 | 2 |
| Paxillin  | 4 | 4 | 3 | 4 | 2 |
| AKT       | 3 | 3 | 4 | 4 | 3 |
| GSK3      | 4 | 4 | 4 | 4 | 3 |
| S6 (S235) | 1 | 1 | 2 | 1 | 1 |
| S6 (S240) | 1 | 1 | 2 | 1 | 2 |
| PKCb      | 2 | 2 | 3 | 2 | 2 |
| PKCd      | 3 | 3 | 3 | 3 | 2 |
| MARCKS    | 3 | 4 | 4 | 4 | 3 |
| CaM       | 2 | 3 | 3 | 3 | 2 |
| RSK3      | 3 | 2 | 4 | 4 | 3 |
| RAF       | 4 | 4 | 4 | 3 | 3 |
| MEK       | 3 | 2 | 3 | 3 | 2 |
| ERK       | 3 | 2 | 3 | 3 | 2 |
| p90RSK    | 1 | 1 | 1 | 1 | 1 |
| STAT1     | 3 | 3 | 3 | 3 | 2 |
| STAT3     | 3 | 3 | 3 | 3 | 2 |
| CREB      | 3 | 4 | 3 | 3 | 2 |
| NF-kB     | 3 | 2 | 2 | 3 | 2 |
| c-Jun     | 3 | 3 | 3 | 3 | 2 |

FAK sh16

|           |   |   |   |   |   |
|-----------|---|---|---|---|---|
| EGFR Y845 | 2 | 1 | 1 | 1 | 1 |
| SHC       | 3 | 2 | 2 | 2 | 2 |
| c-Cbl     | 2 | 2 | 1 | 1 | 1 |
| Paxillin  | 2 | 2 | 1 | 1 | 1 |
| AKT       | 2 | 3 | 3 | 2 | 2 |

|           |   |   |   |   |   |
|-----------|---|---|---|---|---|
| GSK3      | 3 | 4 | 3 | 2 | 2 |
| S6 (S235) | 3 | 3 | 3 | 1 | 1 |
| S6 (S240) | 3 | 2 | 2 | 1 | 1 |
| PKCb      | 2 | 2 | 3 | 2 | 2 |
| PKCd      | 3 | 2 | 2 | 2 | 2 |
| MARCKS    | 2 | 3 | 2 | 2 | 2 |
| CaM       | 3 | 2 | 2 | 2 | 1 |
| RSK3      | 2 | 2 | 1 | 1 | 1 |
| RAF       | 2 | 2 | 2 | 2 | 2 |
| MEK       | 2 | 2 | 3 | 2 | 1 |
| ERK       | 2 | 3 | 3 | 2 | 2 |
| p90RSK    | 2 | 2 | 3 | 2 | 2 |
| STAT1     | 1 | 1 | 1 | 1 | 1 |
| STAT3     | 1 | 1 | 1 | 1 | 1 |
| CREB      | 1 | 2 | 2 | 1 | 1 |
| NF-kB     | 3 | 2 | 2 | 2 | 1 |
| c-Jun     | 3 | 3 | 2 | 2 | 1 |

FAK sh21

|           |   |   |   |   |   |
|-----------|---|---|---|---|---|
| EGFR Y845 | 3 | 3 | 1 | 2 | 1 |
| SHC       | 3 | 3 | 2 | 3 | 2 |
| c-Cbl     | 3 | 3 | 2 | 3 | 2 |
| Paxillin  | 2 | 3 | 2 | 3 | 1 |
| AKT       | 3 | 3 | 4 | 3 | 4 |
| GSK3      | 3 | 3 | 3 | 3 | 2 |
| S6 (S235) | 2 | 1 | 3 | 1 | 2 |
| S6 (S240) | 2 | 1 | 2 | 1 | 2 |
| PKCb      | 3 | 2 | 3 | 3 | 2 |
| PKCd      | 3 | 2 | 2 | 2 | 2 |
| MARCKS    | 2 | 3 | 2 | 2 | 2 |
| CaM       | 3 | 3 | 2 | 2 | 1 |
| RSK3      | 3 | 3 | 2 | 3 | 2 |
| RAF       | 3 | 3 | 2 | 2 | 2 |
| MEK       | 3 | 2 | 4 | 3 | 2 |
| ERK       | 2 | 3 | 4 | 3 | 3 |
| p90RSK    | 3 | 2 | 3 | 3 | 3 |
| STAT1     | 2 | 2 | 1 | 1 | 1 |
| STAT3     | 2 | 2 | 1 | 2 | 1 |
| CREB      | 2 | 3 | 2 | 2 | 1 |
| NF-kB     | 4 | 2 | 2 | 3 | 2 |
| c-Jun     | 4 | 4 | 3 | 3 | 2 |

P130CAS sh3

|           |   |   |   |   |   |
|-----------|---|---|---|---|---|
| EGFR Y845 | 4 | 4 | 3 | 4 | 3 |
| SHC       | 4 | 4 | 3 | 4 | 4 |

|           |   |   |   |   |   |
|-----------|---|---|---|---|---|
| c-Cbl     | 4 | 4 | 3 | 4 | 4 |
| Paxillin  | 3 | 4 | 3 | 4 | 4 |
| AKT       | 4 | 3 | 4 | 3 | 4 |
| GSK3      | 4 | 4 | 4 | 4 | 4 |
| S6 (S235) | 1 | 1 | 3 | 1 | 3 |
| S6 (S240) | 1 | 1 | 3 | 2 | 3 |
| PKCb      | 3 | 3 | 4 | 3 | 4 |
| PKCd      | 3 | 4 | 3 | 3 | 3 |
| MARCKS    | 4 | 4 | 4 | 4 | 4 |
| CaM       | 3 | 3 | 3 | 3 | 3 |
| RSK3      | 3 | 2 | 3 | 3 | 3 |
| RAF       | 4 | 4 | 4 | 3 | 3 |
| MEK       | 4 | 2 | 4 | 4 | 4 |
| ERK       | 3 | 2 | 3 | 3 | 3 |
| p90RSK    | 4 | 2 | 3 | 4 | 4 |
| STAT1     | 4 | 4 | 4 | 4 | 4 |
| STAT3     | 3 | 4 | 3 | 3 | 3 |
| CREB      | 3 | 4 | 3 | 3 | 3 |
| NF-kB     | 4 | 3 | 3 | 3 | 4 |
| c-Jun     | 2 | 3 | 3 | 2 | 3 |

P130CAS sh5

|           |   |   |   |   |   |
|-----------|---|---|---|---|---|
| EGFR Y845 | 4 | 4 | 2 | 4 | 4 |
| SHC       | 3 | 3 | 3 | 4 | 4 |
| c-Cbl     | 3 | 3 | 2 | 3 | 3 |
| Paxillin  | 3 | 4 | 3 | 3 | 4 |
| AKT       | 3 | 4 | 4 | 4 | 4 |
| GSK3      | 3 | 4 | 4 | 4 | 4 |
| S6 (S235) | 2 | 2 | 3 | 1 | 3 |
| S6 (S240) | 2 | 2 | 3 | 1 | 2 |
| PKCb      | 3 | 3 | 4 | 3 | 4 |
| PKCd      | 4 | 4 | 3 | 3 | 4 |
| MARCKS    | 3 | 3 | 3 | 3 | 3 |
| CaM       | 3 | 3 | 3 | 2 | 3 |
| RSK3      | 3 | 3 | 2 | 3 | 3 |
| RAF       | 4 | 4 | 3 | 3 | 3 |
| MEK       | 3 | 2 | 3 | 2 | 3 |
| ERK       | 3 | 3 | 4 | 3 | 4 |
| p90RSK    | 4 | 2 | 3 | 4 | 4 |
| STAT1     | 4 | 3 | 3 | 3 | 4 |
| STAT3     | 4 | 4 | 3 | 3 | 3 |
| CREB      | 2 | 4 | 3 | 3 | 4 |
| NF-kB     | 4 | 2 | 3 | 3 | 4 |
| c-Jun     | 2 | 3 | 2 | 2 | 2 |

|           | FAK pool |   |   |   |   |
|-----------|----------|---|---|---|---|
| EGFR Y845 | 2        | 3 | 2 | 3 | 3 |
| SHC       | 3        | 3 | 3 | 3 | 4 |
| c-Cbl     | 3        | 4 | 3 | 4 | 3 |
| Paxillin  | 3        | 3 | 3 | 4 | 4 |
| AKT       | 3        | 3 | 4 | 4 | 4 |
| GSK3      | 3        | 3 | 3 | 3 | 3 |
| S6 (S235) | 1        | 3 | 3 | 1 | 2 |
| S6 (S240) | 1        | 2 | 3 | 2 | 2 |
| PKCb      | 4        | 3 | 4 | 4 | 4 |
| PKCd      | 3        | 3 | 3 | 3 | 3 |
| MARCKS    | 3        | 3 | 3 | 3 | 3 |
| CaM       | 3        | 4 | 3 | 4 | 4 |
| RSK3      | 4        | 3 | 3 | 3 | 3 |
| RAF       | 4        | 3 | 3 | 3 | 2 |
| MEK       | 3        | 2 | 3 | 3 | 3 |
| ERK       | 3        | 3 | 4 | 4 | 4 |
| p90RSK    | 2        | 2 | 2 | 2 | 3 |
| STAT1     | 2        | 4 | 3 | 3 | 3 |
| STAT3     | 2        | 4 | 2 | 4 | 4 |
| CREB      | 3        | 3 | 2 | 3 | 3 |
| NF-kB     | 2        | 1 | 2 | 3 | 3 |
| c-Jun     | 4        | 4 | 3 | 4 | 4 |

|           | PAK1 sh7 |   |   |   |   |
|-----------|----------|---|---|---|---|
| EGFR Y845 | 4        | 4 | 4 | 4 | 4 |
| SHC       | 4        | 4 | 4 | 4 | 4 |
| c-Cbl     | 4        | 4 | 4 | 4 | 4 |
| Paxillin  | 4        | 4 | 3 | 4 | 4 |
| AKT       | 4        | 4 | 4 | 3 | 4 |
| GSK3      | 4        | 4 | 4 | 4 | 4 |
| S6 (S235) | 1        | 1 | 2 | 1 | 2 |
| S6 (S240) | 1        | 1 | 1 | 1 | 2 |
| PKCb      | 4        | 3 | 4 | 3 | 4 |
| PKCd      | 4        | 4 | 4 | 4 | 4 |
| MARCKS    | 4        | 4 | 4 | 4 | 4 |
| CaM       | 4        | 4 | 3 | 4 | 4 |
| RSK3      | 3        | 3 | 3 | 2 | 3 |
| RAF       | 4        | 4 | 4 | 3 | 4 |
| MEK       | 3        | 2 | 4 | 3 | 4 |
| ERK       | 4        | 3 | 4 | 3 | 4 |
| p90RSK    | 4        | 2 | 3 | 4 | 3 |
| STAT1     | 4        | 4 | 4 | 3 | 4 |
| STAT3     | 4        | 4 | 4 | 4 | 4 |
| CREB      | 4        | 4 | 4 | 3 | 4 |
| NF-kB     | 3        | 2 | 2 | 2 | 3 |
| c-Jun     | 3        | 4 | 3 | 2 | 3 |

|           | PAK1 sh8 |   |   |   |   |
|-----------|----------|---|---|---|---|
| EGFR Y845 | 4        | 3 | 3 | 3 | 3 |
| SHC       | 4        | 4 | 4 | 4 | 4 |
| c-Cbl     | 4        | 4 | 4 | 4 | 4 |
| Paxillin  | 3        | 4 | 3 | 4 | 4 |
| AKT       | 4        | 4 | 4 | 4 | 4 |
| GSK3      | 4        | 4 | 4 | 4 | 4 |
| S6 (S235) | 1        | 1 | 3 | 1 | 2 |
| S6 (S240) | 1        | 1 | 3 | 2 | 3 |
| PKCb      | 3        | 3 | 4 | 3 | 3 |
| PKCd      | 4        | 4 | 4 | 4 | 4 |
| MARCKS    | 3        | 4 | 4 | 4 | 4 |
| CaM       | 4        | 4 | 4 | 4 | 4 |
| RSK3      | 4        | 2 | 3 | 3 | 3 |
| RAF       | 4        | 4 | 4 | 4 | 4 |
| MEK       | 4        | 2 | 3 | 2 | 3 |
| ERK       | 4        | 2 | 4 | 3 | 4 |
| p90RSK    | 3        | 2 | 2 | 2 | 3 |
| STAT1     | 4        | 4 | 3 | 3 | 3 |
| STAT3     | 3        | 4 | 4 | 3 | 4 |
| CREB      | 3        | 4 | 3 | 3 | 4 |
| NF-kB     | 3        | 2 | 3 | 3 | 3 |
| c-Jun     | 3        | 3 | 3 | 3 | 3 |

|           | ROCK2 4 |   |   |   |   |
|-----------|---------|---|---|---|---|
| EGFR Y845 | 3       | 3 | 3 | 4 | 4 |
| SHC       | 4       | 3 | 3 | 4 | 4 |
| c-Cbl     | 4       | 3 | 3 | 3 | 3 |
| Paxillin  | 4       | 4 | 3 | 4 | 4 |
| AKT       | 3       | 3 | 4 | 3 | 4 |
| GSK3      | 3       | 4 | 4 | 3 | 4 |
| S6 (S235) | 2       | 3 | 3 | 1 | 2 |
| S6 (S240) | 2       | 2 | 2 | 1 | 2 |
| PKCb      | 3       | 4 | 4 | 3 | 4 |
| PKCd      | 3       | 3 | 3 | 3 | 3 |
| MARCKS    | 3       | 3 | 3 | 3 | 3 |
| CaM       | 3       | 4 | 3 | 3 | 3 |
| RSK3      | 4       | 3 | 3 | 3 | 3 |
| RAF       | 3       | 3 | 3 | 2 | 3 |
| MEK       | 3       | 3 | 3 | 2 | 3 |
| ERK       | 4       | 4 | 4 | 3 | 4 |
| p90RSK    | 2       | 2 | 4 | 3 | 3 |
| STAT1     | 2       | 3 | 2 | 3 | 2 |
| STAT3     | 3       | 3 | 2 | 3 | 3 |

|       |   |   |   |   |   |
|-------|---|---|---|---|---|
| CREB  | 3 | 3 | 3 | 3 | 4 |
| NF-kB | 4 | 3 | 3 | 3 | 3 |
| c-Jun | 4 | 3 | 3 | 2 | 2 |

ROCK2 6

|           |   |   |   |   |   |
|-----------|---|---|---|---|---|
| EGFR Y845 | 2 | 2 | 2 | 2 | 2 |
| SHC       | 3 | 2 | 2 | 3 | 3 |
| c-Cbl     | 3 | 2 | 2 | 3 | 2 |
| Paxillin  | 3 | 3 | 3 | 3 | 3 |
| AKT       | 3 | 4 | 4 | 4 | 4 |
| GSK3      | 4 | 4 | 4 | 3 | 4 |
| S6 (S235) | 2 | 2 | 2 | 1 | 2 |
| S6 (S240) | 1 | 1 | 1 | 1 | 1 |
| PKCb      | 3 | 4 | 4 | 3 | 4 |
| PKCd      | 3 | 2 | 3 | 2 | 2 |
| MARCKS    | 2 | 2 | 2 | 2 | 2 |
| CaM       | 2 | 3 | 3 | 3 | 3 |
| RSK3      | 3 | 3 | 3 | 3 | 4 |
| RAF       | 3 | 3 | 3 | 2 | 2 |
| MEK       | 3 | 3 | 3 | 2 | 3 |
| ERK       | 3 | 4 | 4 | 3 | 4 |
| p90RSK    | 2 | 2 | 4 | 3 | 4 |
| STAT1     | 1 | 2 | 1 | 1 | 2 |
| STAT3     | 3 | 2 | 2 | 2 | 3 |
| CREB      | 3 | 3 | 3 | 3 | 3 |
| NF-kB     | 3 | 3 | 2 | 2 | 2 |
| c-Jun     | 3 | 3 | 3 | 2 | 3 |

PLCG1 sh2

|           |   |   |   |   |   |
|-----------|---|---|---|---|---|
| EGFR Y845 | 4 | 3 | 1 | 2 | 1 |
| SHC       | 3 | 3 | 2 | 3 | 3 |
| c-Cbl     | 3 | 3 | 1 | 2 | 2 |
| Paxillin  | 3 | 3 | 2 | 2 | 3 |
| AKT       | 3 | 3 | 2 | 3 | 3 |
| GSK3      | 2 | 3 | 2 | 2 | 2 |
| S6 (S235) | 2 | 2 | 2 | 1 | 2 |
| S6 (S240) | 2 | 2 | 3 | 2 | 2 |
| PKCb      | 1 | 1 | 1 | 1 | 1 |
| PKCd      | 1 | 1 | 1 | 1 | 1 |
| MARCKS    | 1 | 1 | 1 | 1 | 1 |
| CaM       | 3 | 3 | 2 | 2 | 2 |
| RSK3      | 3 | 2 | 1 | 2 | 2 |
| RAF       | 3 | 3 | 2 | 2 | 2 |
| MEK       | 4 | 2 | 2 | 2 | 2 |
| ERK       | 4 | 2 | 3 | 3 | 3 |

|        |   |   |   |   |   |
|--------|---|---|---|---|---|
| p90RSK | 3 | 3 | 3 | 2 | 3 |
| STAT1  | 3 | 3 | 2 | 2 | 1 |
| STAT3  | 3 | 3 | 2 | 2 | 3 |
| CREB   | 2 | 3 | 2 | 2 | 2 |
| NF-kB  | 1 | 1 | 1 | 1 | 2 |
| c-Jun  | 2 | 3 | 1 | 1 | 2 |

PLCG1 sh3

|           |   |   |   |   |   |
|-----------|---|---|---|---|---|
| EGFR Y845 | 2 | 2 | 2 | 2 | 1 |
| SHC       | 3 | 3 | 2 | 3 | 2 |
| c-Cbl     | 1 | 2 | 1 | 2 | 1 |
| Paxillin  | 1 | 2 | 1 | 1 | 1 |
| AKT       | 2 | 3 | 2 | 2 | 2 |
| GSK3      | 2 | 3 | 2 | 2 | 2 |
| S6 (S235) | 4 | 4 | 4 | 2 | 2 |
| S6 (S240) | 4 | 4 | 4 | 3 | 3 |
| PKCb      | 1 | 1 | 1 | 1 | 1 |
| PKCd      | 1 | 1 | 1 | 1 | 1 |
| MARCKS    | 1 | 1 | 1 | 1 | 1 |
| CaM       | 3 | 4 | 2 | 2 | 2 |
| RSK3      | 1 | 1 | 1 | 1 | 1 |
| RAF       | 2 | 2 | 2 | 2 | 2 |
| MEK       | 3 | 1 | 2 | 2 | 2 |
| ERK       | 3 | 2 | 3 | 3 | 2 |
| p90RSK    | 2 | 2 | 3 | 2 | 3 |
| STAT1     | 3 | 3 | 2 | 2 | 2 |
| STAT3     | 3 | 3 | 2 | 3 | 1 |
| CREB      | 1 | 2 | 1 | 2 | 2 |
| NF-kB     | 1 | 1 | 1 | 1 | 1 |
| c-Jun     | 1 | 2 | 1 | 1 | 1 |

PKC-A sh3

|           |   |   |   |   |   |
|-----------|---|---|---|---|---|
| EGFR Y845 | 2 | 3 | 1 | 1 | 2 |
| SHC       | 2 | 3 | 2 | 2 | 3 |
| c-Cbl     | 2 | 2 | 2 | 1 | 1 |
| Paxillin  | 2 | 3 | 2 | 2 | 2 |
| AKT       | 3 | 3 | 3 | 3 | 3 |
| GSK3      | 3 | 4 | 3 | 2 | 3 |
| S6 (S235) | 1 | 1 | 2 | 1 | 2 |
| S6 (S240) | 1 | 1 | 1 | 1 | 1 |
| PKCb      | 1 | 1 | 1 | 1 | 1 |
| PKCd      | 3 | 3 | 2 | 2 | 2 |
| MARCKS    | 1 | 1 | 1 | 1 | 1 |
| CaM       | 2 | 3 | 2 | 2 | 2 |
| RSK3      | 2 | 4 | 4 | 2 | 3 |

|        |   |   |   |   |   |
|--------|---|---|---|---|---|
| RAF    | 2 | 3 | 2 | 2 | 2 |
| MEK    | 2 | 3 | 3 | 2 | 3 |
| ERK    | 2 | 3 | 4 | 3 | 3 |
| p90RSK | 3 | 2 | 3 | 2 | 2 |
| STAT1  | 2 | 3 | 1 | 1 | 1 |
| STAT3  | 2 | 3 | 1 | 2 | 2 |
| CREB   | 1 | 2 | 2 | 2 | 2 |
| NF-kB  | 2 | 2 | 2 | 1 | 2 |
| c-Jun  | 2 | 4 | 1 | 1 | 2 |

PKC-A sh8

|           |   |   |   |   |   |
|-----------|---|---|---|---|---|
| EGFR Y845 | 2 | 3 | 1 | 2 | 2 |
| SHC       | 2 | 3 | 2 | 3 | 2 |
| c-Cbl     | 2 | 3 | 2 | 2 | 2 |
| Paxillin  | 2 | 3 | 2 | 3 | 2 |
| AKT       | 2 | 2 | 3 | 2 | 2 |
| GSK3      | 2 | 3 | 2 | 2 | 2 |
| S6 (S235) | 2 | 2 | 2 | 1 | 2 |
| S6 (S240) | 2 | 1 | 2 | 1 | 2 |
| PKCb      | 1 | 1 | 1 | 1 | 1 |
| PKCd      | 3 | 3 | 2 | 3 | 2 |
| MARCKS    | 1 | 1 | 1 | 1 | 1 |
| CaM       | 2 | 3 | 2 | 2 | 2 |
| RSK3      | 2 | 3 | 2 | 2 | 2 |
| RAF       | 2 | 3 | 2 | 2 | 2 |
| MEK       | 2 | 2 | 3 | 2 | 2 |
| ERK       | 2 | 2 | 3 | 2 | 2 |
| p90RSK    | 3 | 1 | 3 | 2 | 3 |
| STAT1     | 2 | 3 | 2 | 1 | 1 |
| STAT3     | 2 | 3 | 2 | 2 | 2 |
| CREB      | 1 | 3 | 2 | 2 | 2 |
| NF-kB     | 2 | 2 | 2 | 2 | 2 |
| c-Jun     | 2 | 4 | 2 | 2 | 1 |

PKC-B sh2

|           |   |   |   |   |   |
|-----------|---|---|---|---|---|
| EGFR Y845 | 1 | 2 | 1 | 1 | 1 |
| SHC       | 2 | 3 | 2 | 2 | 2 |
| c-Cbl     | 2 | 3 | 1 | 1 | 1 |
| Paxillin  | 2 | 3 | 2 | 2 | 1 |
| AKT       | 2 | 3 | 2 | 2 | 2 |
| GSK3      | 2 | 3 | 2 | 2 | 2 |
| S6 (S235) | 2 | 2 | 3 | 1 | 2 |
| S6 (S240) | 3 | 2 | 3 | 1 | 2 |
| PKCb      | 1 | 1 | 1 | 1 | 1 |
| PKCd      | 3 | 3 | 2 | 2 | 2 |

|        |   |   |   |   |   |
|--------|---|---|---|---|---|
| MARCKS | 1 | 1 | 1 | 1 | 1 |
| CaM    | 2 | 2 | 1 | 1 | 1 |
| RSK3   | 2 | 2 | 1 | 1 | 1 |
| RAF    | 2 | 3 | 2 | 2 | 2 |
| MEK    | 2 | 2 | 3 | 2 | 2 |
| ERK    | 3 | 3 | 3 | 2 | 2 |
| p90RSK | 3 | 2 | 3 | 2 | 2 |
| STAT1  | 2 | 2 | 1 | 1 | 1 |
| STAT3  | 2 | 2 | 1 | 1 | 1 |
| CREB   | 1 | 3 | 1 | 1 | 1 |
| NF-kB  | 1 | 1 | 1 | 1 | 1 |
| c-Jun  | 1 | 3 | 1 | 1 | 1 |

PKC-B sh5

|           |   |   |   |   |   |
|-----------|---|---|---|---|---|
| EGFR Y845 | 2 | 2 | 1 | 2 | 1 |
| SHC       | 3 | 3 | 2 | 3 | 3 |
| c-Cbl     | 2 | 2 | 1 | 1 | 1 |
| Paxillin  | 1 | 2 | 1 | 1 | 1 |
| AKT       | 2 | 2 | 2 | 2 | 2 |
| GSK3      | 2 | 3 | 2 | 2 | 2 |
| S6 (S235) | 2 | 2 | 2 | 1 | 2 |
| S6 (S240) | 2 | 2 | 2 | 1 | 1 |
| PKCb      | 1 | 1 | 1 | 1 | 1 |
| PKCd      | 3 | 4 | 2 | 3 | 3 |
| MARCKS    | 1 | 1 | 1 | 1 | 1 |
| CaM       | 3 | 3 | 2 | 2 | 2 |
| RSK3      | 2 | 1 | 1 | 1 | 1 |
| RAF       | 2 | 3 | 2 | 2 | 2 |
| MEK       | 2 | 1 | 2 | 1 | 2 |
| ERK       | 2 | 2 | 3 | 2 | 2 |
| p90RSK    | 3 | 3 | 4 | 3 | 3 |
| STAT1     | 4 | 3 | 2 | 2 | 2 |
| STAT3     | 3 | 2 | 2 | 1 | 1 |
| CREB      | 1 | 2 | 1 | 2 | 2 |
| NF-kB     | 1 | 1 | 1 | 1 | 1 |
| c-Jun     | 1 | 1 | 1 | 1 | 1 |

PKC-D sh06

|           |   |   |   |   |   |
|-----------|---|---|---|---|---|
| EGFR Y845 | 1 | 2 | 1 | 1 | 1 |
| SHC       | 2 | 2 | 1 | 2 | 2 |
| c-Cbl     | 2 | 2 | 1 | 1 | 1 |
| Paxillin  | 2 | 3 | 1 | 2 | 1 |
| AKT       | 2 | 3 | 2 | 2 | 2 |
| GSK3      | 2 | 2 | 1 | 1 | 1 |
| S6 (S235) | 1 | 1 | 2 | 1 | 1 |

|           |   |   |   |   |   |
|-----------|---|---|---|---|---|
| S6 (S240) | 1 | 1 | 1 | 1 | 1 |
| PKCb      | 2 | 2 | 2 | 2 | 2 |
| PKCd      | 1 | 1 | 1 | 1 | 1 |
| MARCKS    | 1 | 1 | 1 | 1 | 1 |
| CaM       | 2 | 2 | 1 | 1 | 1 |
| RSK3      | 2 | 2 | 1 | 1 | 1 |
| RAF       | 2 | 3 | 2 | 2 | 2 |
| MEK       | 2 | 2 | 2 | 2 | 2 |
| ERK       | 2 | 2 | 2 | 2 | 2 |
| p90RSK    | 3 | 1 | 3 | 2 | 2 |
| STAT1     | 1 | 2 | 1 | 1 | 1 |
| STAT3     | 1 | 2 | 1 | 1 | 1 |
| CREB      | 1 | 2 | 1 | 1 | 1 |
| NF-kB     | 1 | 1 | 1 | 1 | 1 |
| c-Jun     | 2 | 4 | 1 | 1 | 1 |

PKC-D sh08

|           |   |   |   |   |   |
|-----------|---|---|---|---|---|
| EGFR Y845 | 3 | 3 | 1 | 1 | 2 |
| SHC       | 3 | 3 | 2 | 2 | 2 |
| c-Cbl     | 2 | 2 | 1 | 1 | 1 |
| Paxillin  | 2 | 3 | 2 | 2 | 2 |
| AKT       | 3 | 3 | 2 | 2 | 2 |
| GSK3      | 3 | 2 | 2 | 2 | 2 |
| S6 (S235) | 2 | 1 | 2 | 1 | 1 |
| S6 (S240) | 1 | 1 | 2 | 1 | 1 |
| PKCb      | 2 | 2 | 3 | 2 | 2 |
| PKCd      | 1 | 1 | 1 | 1 | 1 |
| MARCKS    | 1 | 1 | 1 | 1 | 1 |
| CaM       | 2 | 2 | 1 | 1 | 1 |
| RSK3      | 3 | 1 | 1 | 1 | 2 |
| RAF       | 3 | 3 | 2 | 2 | 2 |
| MEK       | 2 | 2 | 3 | 2 | 2 |
| ERK       | 3 | 3 | 3 | 2 | 3 |
| p90RSK    | 3 | 2 | 3 | 2 | 2 |
| STAT1     | 2 | 3 | 1 | 1 | 1 |
| STAT3     | 2 | 2 | 1 | 2 | 2 |
| CREB      | 2 | 3 | 1 | 1 | 1 |
| NF-kB     | 1 | 1 | 1 | 1 | 1 |
| c-Jun     | 2 | 2 | 1 | 2 | 4 |

PKC-E sh1

|           |   |   |   |   |   |
|-----------|---|---|---|---|---|
| EGFR Y845 | 3 | 1 | 1 | 3 | 1 |
| SHC       | 3 | 2 | 1 | 2 | 2 |
| c-Cbl     | 3 | 2 | 1 | 2 | 1 |
| Paxillin  | 3 | 3 | 1 | 3 | 2 |

|           |   |   |   |   |   |
|-----------|---|---|---|---|---|
| AKT       | 3 | 2 | 1 | 2 | 2 |
| GSK3      | 3 | 2 | 1 | 2 | 2 |
| S6 (S235) | 2 | 1 | 2 | 1 | 1 |
| S6 (S240) | 1 | 1 | 2 | 2 | 2 |
| PKCb      | 2 | 2 | 2 | 2 | 2 |
| PKCd      | 3 | 2 | 2 | 2 | 2 |
| MARCKS    | 3 | 2 | 2 | 2 | 2 |
| CaM       | 3 | 2 | 1 | 2 | 1 |
| RSK3      | 3 | 1 | 1 | 3 | 2 |
| RAF       | 3 | 2 | 2 | 2 | 2 |
| MEK       | 2 | 1 | 1 | 1 | 1 |
| ERK       | 2 | 1 | 1 | 2 | 2 |
| p90RSK    | 2 | 2 | 2 | 1 | 2 |
| STAT1     | 1 | 1 | 1 | 1 | 1 |
| STAT3     | 2 | 1 | 1 | 2 | 1 |
| CREB      | 2 | 2 | 1 | 2 | 1 |
| NF-kB     | 2 | 1 | 1 | 1 | 1 |
| c-Jun     | 2 | 2 | 1 | 1 | 1 |

PKC-E sh5

|           |   |   |   |   |   |
|-----------|---|---|---|---|---|
| EGFR Y845 | 2 | 2 | 1 | 3 | 2 |
| SHC       | 2 | 3 | 2 | 3 | 2 |
| c-Cbl     | 2 | 2 | 1 | 2 | 1 |
| Paxillin  | 2 | 3 | 2 | 3 | 2 |
| AKT       | 3 | 3 | 2 | 3 | 2 |
| GSK3      | 3 | 3 | 2 | 3 | 2 |
| S6 (S235) | 2 | 3 | 3 | 1 | 1 |
| S6 (S240) | 2 | 2 | 3 | 2 | 2 |
| PKCb      | 3 | 2 | 3 | 3 | 2 |
| PKCd      | 3 | 3 | 2 | 2 | 2 |
| MARCKS    | 2 | 2 | 2 | 2 | 2 |
| CaM       | 2 | 2 | 2 | 2 | 2 |
| RSK3      | 3 | 2 | 1 | 3 | 2 |
| RAF       | 2 | 3 | 2 | 2 | 2 |
| MEK       | 2 | 1 | 2 | 2 | 1 |
| ERK       | 2 | 2 | 3 | 3 | 3 |
| p90RSK    | 3 | 2 | 3 | 2 | 2 |
| STAT1     | 2 | 2 | 1 | 1 | 1 |
| STAT3     | 2 | 2 | 1 | 2 | 1 |
| CREB      | 1 | 2 | 1 | 2 | 2 |
| NF-kB     | 1 | 1 | 1 | 1 | 1 |
| c-Jun     | 2 | 2 | 1 | 2 | 1 |

PKC pool

|           |   |   |   |   |   |
|-----------|---|---|---|---|---|
| EGFR Y845 | 3 | 3 | 3 | 4 | 4 |
|-----------|---|---|---|---|---|

|           |   |   |   |   |   |
|-----------|---|---|---|---|---|
| SHC       | 3 | 3 | 3 | 3 | 3 |
| c-Cbl     | 4 | 4 | 2 | 4 | 4 |
| Paxillin  | 4 | 4 | 3 | 3 | 4 |
| AKT       | 3 | 3 | 4 | 3 | 4 |
| GSK3      | 3 | 4 | 3 | 3 | 3 |
| S6 (S235) | 2 | 2 | 3 | 1 | 2 |
| S6 (S240) | 1 | 1 | 3 | 1 | 2 |
| PKCb      | 1 | 1 | 1 | 1 | 1 |
| PKCd      | 1 | 1 | 1 | 1 | 1 |
| MARCKS    | 1 | 1 | 1 | 1 | 1 |
| CaM       | 3 | 4 | 3 | 3 | 3 |
| RSK3      | 4 | 4 | 4 | 4 | 4 |
| RAF       | 3 | 3 | 3 | 3 | 3 |
| MEK       | 2 | 3 | 3 | 2 | 3 |
| ERK       | 3 | 3 | 3 | 3 | 3 |
| p90RSK    | 1 | 2 | 4 | 2 | 3 |
| STAT1     | 2 | 3 | 2 | 3 | 2 |
| STAT3     | 3 | 2 | 2 | 4 | 4 |
| CREB      | 3 | 3 | 3 | 3 | 3 |
| NF-kB     | 2 | 2 | 2 | 2 | 2 |
| c-Jun     | 4 | 4 | 3 | 3 | 4 |

CAMK2D sh4

|           |   |   |   |   |   |
|-----------|---|---|---|---|---|
| EGFR Y845 | 4 | 4 | 3 | 4 | 4 |
| SHC       | 4 | 4 | 4 | 4 | 4 |
| c-Cbl     | 4 | 4 | 3 | 4 | 4 |
| Paxillin  | 4 | 4 | 3 | 4 | 4 |
| AKT       | 4 | 4 | 4 | 4 | 4 |
| GSK3      | 4 | 4 | 4 | 4 | 4 |
| S6 (S235) | 1 | 1 | 4 | 2 | 3 |
| S6 (S240) | 1 | 1 | 4 | 2 | 4 |
| PKCb      | 4 | 3 | 4 | 4 | 4 |
| PKCd      | 4 | 4 | 3 | 4 | 3 |
| MARCKS    | 4 | 4 | 4 | 4 | 4 |
| CaM       | 1 | 1 | 1 | 1 | 1 |
| RSK3      | 3 | 2 | 3 | 4 | 3 |
| RAF       | 4 | 4 | 4 | 4 | 3 |
| MEK       | 4 | 3 | 4 | 4 | 4 |
| ERK       | 4 | 2 | 4 | 4 | 4 |
| p90RSK    | 2 | 2 | 3 | 4 | 4 |
| STAT1     | 3 | 3 | 3 | 3 | 3 |
| STAT3     | 4 | 4 | 3 | 4 | 3 |
| CREB      | 4 | 4 | 4 | 4 | 4 |
| NF-kB     | 4 | 3 | 3 | 3 | 3 |
| c-Jun     | 2 | 3 | 3 | 3 | 3 |

## CAMK2D sh9

|           |   |   |   |   |   |
|-----------|---|---|---|---|---|
| EGFR Y845 | 2 | 2 | 1 | 1 | 1 |
| SHC       | 3 | 3 | 1 | 2 | 2 |
| c-Cbl     | 2 | 2 | 1 | 1 | 1 |
| Paxillin  | 1 | 2 | 1 | 1 | 1 |
| AKT       | 2 | 3 | 2 | 2 | 2 |
| GSK3      | 2 | 3 | 2 | 2 | 2 |
| S6 (S235) | 2 | 3 | 2 | 1 | 1 |
| S6 (S240) | 3 | 3 | 2 | 1 | 1 |
| PKCb      | 2 | 2 | 2 | 2 | 1 |
| PKCd      | 3 | 3 | 2 | 2 | 2 |
| MARCKS    | 2 | 3 | 2 | 2 | 2 |
| CaM       | 1 | 1 | 1 | 1 | 1 |
| RSK3      | 1 | 1 | 1 | 1 | 1 |
| RAF       | 2 | 2 | 2 | 2 | 2 |
| MEK       | 2 | 3 | 3 | 2 | 2 |
| ERK       | 3 | 3 | 2 | 2 | 2 |
| p90RSK    | 1 | 2 | 3 | 2 | 2 |
| STAT1     | 3 | 2 | 1 | 2 | 2 |
| STAT3     | 4 | 3 | 1 | 1 | 2 |
| CREB      | 1 | 2 | 1 | 2 | 1 |
| NF-kB     | 3 | 2 | 1 | 2 | 1 |
| c-Jun     | 1 | 2 | 1 | 1 | 1 |

## CAMKK2 sh7

|           |   |   |   |   |   |
|-----------|---|---|---|---|---|
| EGFR Y845 | 2 | 2 | 1 | 3 | 2 |
| SHC       | 2 | 3 | 2 | 3 | 3 |
| c-Cbl     | 3 | 3 | 1 | 2 | 2 |
| Paxillin  | 2 | 2 | 1 | 2 | 2 |
| AKT       | 2 | 2 | 3 | 2 | 3 |
| GSK3      | 3 | 3 | 2 | 2 | 2 |
| S6 (S235) | 3 | 2 | 3 | 2 | 2 |
| S6 (S240) | 3 | 3 | 3 | 2 | 2 |
| PKCb      | 2 | 2 | 3 | 3 | 3 |
| PKCd      | 3 | 3 | 2 | 2 | 2 |
| MARCKS    | 2 | 2 | 2 | 2 | 2 |
| CaM       | 1 | 1 | 1 | 1 | 1 |
| RSK3      | 1 | 2 | 1 | 2 | 1 |
| RAF       | 3 | 3 | 2 | 2 | 2 |
| MEK       | 3 | 3 | 3 | 3 | 3 |
| ERK       | 3 | 3 | 4 | 4 | 4 |
| p90RSK    | 3 | 2 | 3 | 2 | 4 |
| STAT1     | 2 | 2 | 2 | 2 | 1 |
| STAT3     | 2 | 2 | 1 | 2 | 2 |
| CREB      | 1 | 2 | 2 | 3 | 2 |
| NF-kB     | 2 | 2 | 1 | 2 | 2 |

|       |   |   |   |   |   |
|-------|---|---|---|---|---|
| c-Jun | 3 | 3 | 2 | 2 | 2 |
|-------|---|---|---|---|---|

CAMKK2 sh9

|           |   |   |   |   |   |
|-----------|---|---|---|---|---|
| EGFR Y845 | 3 | 3 | 2 | 3 | 2 |
| SHC       | 4 | 3 | 3 | 3 | 3 |
| c-Cbl     | 3 | 3 | 2 | 2 | 2 |
| Paxillin  | 3 | 3 | 2 | 2 | 2 |
| AKT       | 4 | 3 | 4 | 3 | 3 |
| GSK3      | 3 | 3 | 3 | 3 | 2 |
| S6 (S235) | 3 | 2 | 4 | 2 | 2 |
| S6 (S240) | 3 | 2 | 4 | 3 | 3 |
| PKCb      | 2 | 2 | 3 | 2 | 2 |
| PKCd      | 3 | 3 | 2 | 2 | 2 |
| MARCKS    | 3 | 3 | 3 | 3 | 2 |
| CaM       | 1 | 1 | 1 | 1 | 1 |
| RSK3      | 2 | 1 | 1 | 1 | 1 |
| RAF       | 4 | 3 | 3 | 2 | 2 |
| MEK       | 2 | 2 | 3 | 2 | 2 |
| ERK       | 3 | 2 | 4 | 3 | 3 |
| p90RSK    | 4 | 2 | 3 | 3 | 3 |
| STAT1     | 2 | 3 | 2 | 1 | 1 |
| STAT3     | 2 | 2 | 2 | 2 | 2 |
| CREB      | 2 | 2 | 2 | 2 | 2 |
| NF-kB     | 3 | 2 | 2 | 2 | 1 |
| c-Jun     | 2 | 2 | 2 | 2 | 1 |

PPP1CA sh4

|           |   |   |   |   |   |
|-----------|---|---|---|---|---|
| EGFR Y845 | 3 | 3 | 2 | 3 | 2 |
| SHC       | 3 | 3 | 3 | 3 | 3 |
| c-Cbl     | 4 | 3 | 2 | 3 | 2 |
| Paxillin  | 4 | 4 | 4 | 4 | 3 |
| AKT       | 2 | 2 | 2 | 2 | 2 |
| GSK3      | 2 | 2 | 2 | 2 | 2 |
| S6 (S235) | 4 | 4 | 4 | 2 | 3 |
| S6 (S240) | 3 | 2 | 4 | 3 | 3 |
| PKCb      | 3 | 3 | 4 | 3 | 3 |
| PKCd      | 3 | 3 | 3 | 3 | 2 |
| MARCKS    | 3 | 4 | 3 | 3 | 2 |
| CaM       | 3 | 4 | 3 | 3 | 2 |
| RSK3      | 4 | 3 | 4 | 4 | 4 |
| RAF       | 3 | 3 | 3 | 2 | 2 |
| MEK       | 2 | 2 | 3 | 3 | 3 |
| ERK       | 2 | 2 | 3 | 2 | 2 |
| p90RSK    | 2 | 2 | 2 | 3 | 3 |
| STAT1     | 2 | 3 | 2 | 2 | 1 |

|       |   |   |   |   |   |
|-------|---|---|---|---|---|
| STAT3 | 3 | 3 | 3 | 3 | 2 |
| CREB  | 2 | 3 | 3 | 3 | 2 |
| NF-kB | 4 | 3 | 4 | 4 | 4 |
| c-Jun | 2 | 3 | 2 | 2 | 2 |

PPP1CA sh5

|           |   |   |   |   |   |
|-----------|---|---|---|---|---|
| EGFR Y845 | 2 | 4 | 3 | 3 | 2 |
| SHC       | 3 | 4 | 3 | 3 | 3 |
| c-Cbl     | 4 | 4 | 2 | 3 | 2 |
| Paxillin  | 4 | 4 | 3 | 3 | 3 |
| AKT       | 3 | 3 | 3 | 2 | 2 |
| GSK3      | 4 | 3 | 4 | 3 | 3 |
| S6 (S235) | 3 | 2 | 4 | 2 | 3 |
| S6 (S240) | 3 | 1 | 4 | 3 | 3 |
| PKCb      | 2 | 3 | 3 | 2 | 3 |
| PKCd      | 3 | 3 | 2 | 3 | 3 |
| MARCKS    | 3 | 4 | 3 | 3 | 3 |
| CaM       | 3 | 3 | 3 | 3 | 2 |
| RSK3      | 4 | 3 | 3 | 3 | 3 |
| RAF       | 3 | 3 | 3 | 3 | 3 |
| MEK       | 2 | 2 | 3 | 3 | 3 |
| ERK       | 3 | 2 | 3 | 2 | 3 |
| p90RSK    | 3 | 1 | 3 | 2 | 3 |
| STAT1     | 2 | 3 | 3 | 2 | 1 |
| STAT3     | 2 | 3 | 3 | 3 | 3 |
| CREB      | 2 | 3 | 2 | 2 | 2 |
| NF-kB     | 3 | 3 | 2 | 2 | 2 |
| c-Jun     | 2 | 3 | 2 | 2 | 2 |

PP2CA sh4

|           |   |   |   |   |   |
|-----------|---|---|---|---|---|
| EGFR Y845 | 4 | 4 | 4 | 4 | 4 |
| SHC       | 4 | 4 | 3 | 4 | 3 |
| c-Cbl     | 4 | 3 | 3 | 4 | 4 |
| Paxillin  | 3 | 3 | 3 | 4 | 4 |
| AKT       | 4 | 2 | 4 | 4 | 4 |
| GSK3      | 4 | 3 | 4 | 4 | 4 |
| S6 (S235) | 2 | 2 | 4 | 2 | 3 |
| S6 (S240) | 2 | 2 | 4 | 3 | 4 |
| PKCb      | 4 | 3 | 4 | 3 | 4 |
| PKCd      | 4 | 3 | 4 | 4 | 3 |
| MARCKS    | 4 | 4 | 4 | 4 | 4 |
| CaM       | 4 | 4 | 4 | 4 | 4 |
| RSK3      | 4 | 2 | 3 | 4 | 4 |
| RAF       | 3 | 3 | 4 | 3 | 3 |
| MEK       | 3 | 2 | 3 | 3 | 4 |

|        |   |   |   |   |   |
|--------|---|---|---|---|---|
| ERK    | 4 | 2 | 4 | 3 | 4 |
| p90RSK | 1 | 2 | 3 | 2 | 3 |
| STAT1  | 3 | 4 | 3 | 4 | 3 |
| STAT3  | 4 | 4 | 4 | 4 | 4 |
| CREB   | 3 | 3 | 3 | 3 | 3 |
| NF-kB  | 4 | 2 | 2 | 3 | 3 |
| c-Jun  | 4 | 3 | 3 | 3 | 4 |

PP2CA sh5

|           |   |   |   |   |   |
|-----------|---|---|---|---|---|
| EGFR Y845 | 2 | 2 | 1 | 2 | 1 |
| SHC       | 2 | 2 | 2 | 3 | 2 |
| c-Cbl     | 3 | 2 | 2 | 3 | 2 |
| Paxillin  | 2 | 4 | 2 | 3 | 2 |
| AKT       | 2 | 2 | 2 | 4 | 2 |
| GSK3      | 2 | 3 | 2 | 3 | 2 |
| S6 (S235) | 3 | 3 | 4 | 2 | 2 |
| S6 (S240) | 4 | 3 | 4 | 4 | 3 |
| PKCb      | 2 | 2 | 3 | 4 | 2 |
| PKCd      | 3 | 3 | 2 | 3 | 2 |
| MARCKS    | 2 | 3 | 2 | 3 | 2 |
| CaM       | 2 | 3 | 2 | 2 | 1 |
| RSK3      | 3 | 2 | 1 | 3 | 2 |
| RAF       | 2 | 3 | 2 | 2 | 2 |
| MEK       | 2 | 2 | 3 | 2 | 2 |
| ERK       | 3 | 2 | 3 | 4 | 2 |
| p90RSK    | 3 | 2 | 3 | 2 | 4 |
| STAT1     | 2 | 3 | 2 | 2 | 1 |
| STAT3     | 2 | 3 | 2 | 3 | 2 |
| CREB      | 1 | 3 | 1 | 2 | 1 |
| NF-kB     | 2 | 1 | 1 | 3 | 1 |
| c-Jun     | 2 | 2 | 2 | 2 | 2 |

PPCA pool

|           |   |   |   |   |   |
|-----------|---|---|---|---|---|
| EGFR Y845 | 2 | 3 | 1 | 3 | 2 |
| SHC       | 2 | 3 | 2 | 3 | 2 |
| c-Cbl     | 2 | 4 | 2 | 2 | 2 |
| Paxillin  | 2 | 3 | 2 | 3 | 3 |
| AKT       | 2 | 3 | 3 | 2 | 2 |
| GSK3      | 2 | 3 | 2 | 2 | 2 |
| S6 (S235) | 2 | 1 | 3 | 1 | 1 |
| S6 (S240) | 2 | 1 | 2 | 1 | 2 |
| PKCb      | 2 | 2 | 3 | 3 | 2 |
| PKCd      | 2 | 2 | 2 | 3 | 2 |
| MARCKS    | 2 | 4 | 2 | 3 | 2 |
| CaM       | 2 | 2 | 2 | 2 | 2 |

|        |   |   |   |   |   |
|--------|---|---|---|---|---|
| RSK3   | 2 | 2 | 2 | 2 | 2 |
| RAF    | 2 | 4 | 2 | 2 | 2 |
| MEK    | 2 | 2 | 2 | 2 | 2 |
| ERK    | 2 | 2 | 3 | 3 | 2 |
| p90RSK | 3 | 1 | 2 | 2 | 3 |
| STAT1  | 1 | 3 | 2 | 2 | 1 |
| STAT3  | 1 | 2 | 2 | 2 | 1 |
| CREB   | 1 | 3 | 2 | 2 | 2 |
| NF-kB  | 1 | 1 | 1 | 1 | 1 |
| c-Jun  | 2 | 3 | 2 | 2 | 2 |

PTPN1 sh1

|           |   |   |   |   |   |
|-----------|---|---|---|---|---|
| EGFR Y845 | 1 | 3 | 1 | 2 | 1 |
| SHC       | 2 | 3 | 2 | 3 | 2 |
| c-Cbl     | 2 | 3 | 1 | 2 | 1 |
| Paxillin  | 2 | 3 | 2 | 2 | 1 |
| AKT       | 3 | 4 | 2 | 2 | 2 |
| GSK3      | 3 | 4 | 2 | 2 | 2 |
| S6 (S235) | 3 | 3 | 3 | 1 | 1 |
| S6 (S240) | 3 | 2 | 3 | 2 | 2 |
| PKCb      | 2 | 3 | 2 | 2 | 2 |
| PKCd      | 2 | 2 | 2 | 2 | 2 |
| MARCKS    | 2 | 3 | 2 | 2 | 2 |
| CaM       | 2 | 3 | 1 | 2 | 1 |
| RSK3      | 2 | 2 | 1 | 2 | 1 |
| RAF       | 2 | 3 | 2 | 2 | 2 |
| MEK       | 2 | 2 | 2 | 2 | 1 |
| ERK       | 2 | 2 | 2 | 2 | 2 |
| p90RSK    | 2 | 1 | 3 | 2 | 2 |
| STAT1     | 1 | 3 | 1 | 1 | 1 |
| STAT3     | 2 | 3 | 2 | 2 | 2 |
| CREB      | 1 | 2 | 1 | 1 | 1 |
| NF-kB     | 1 | 2 | 1 | 2 | 1 |
| c-Jun     | 1 | 3 | 1 | 1 | 1 |

PTPN1 sh5

|           |   |   |   |   |   |
|-----------|---|---|---|---|---|
| EGFR Y845 | 2 | 2 | 1 | 1 | 1 |
| SHC       | 2 | 3 | 1 | 2 | 2 |
| c-Cbl     | 2 | 4 | 1 | 2 | 2 |
| Paxillin  | 2 | 4 | 2 | 3 | 3 |
| AKT       | 2 | 3 | 2 | 2 | 2 |
| GSK3      | 2 | 3 | 2 | 2 | 2 |
| S6 (S235) | 3 | 2 | 3 | 1 | 2 |
| S6 (S240) | 3 | 2 | 3 | 2 | 2 |
| PKCb      | 2 | 3 | 2 | 2 | 2 |

|        |   |   |   |   |   |
|--------|---|---|---|---|---|
| PKCd   | 3 | 3 | 2 | 2 | 2 |
| MARCKS | 2 | 3 | 2 | 2 | 2 |
| CaM    | 3 | 3 | 2 | 2 | 2 |
| RSK3   | 3 | 3 | 1 | 2 | 2 |
| RAF    | 2 | 3 | 2 | 2 | 2 |
| MEK    | 2 | 2 | 1 | 1 | 1 |
| ERK    | 3 | 2 | 2 | 2 | 2 |
| p90RSK | 2 | 2 | 3 | 1 | 2 |
| STAT1  | 1 | 3 | 1 | 2 | 1 |
| STAT3  | 2 | 3 | 1 | 3 | 3 |
| CREB   | 1 | 3 | 1 | 2 | 2 |
| NF-kB  | 1 | 1 | 1 | 1 | 1 |
| c-Jun  | 1 | 3 | 2 | 2 | 1 |

PTPN6 sh2

|           |   |   |   |   |   |
|-----------|---|---|---|---|---|
| EGFR Y845 | 4 | 2 | 2 | 4 | 3 |
| SHC       | 4 | 3 | 3 | 4 | 4 |
| c-Cbl     | 4 | 4 | 3 | 4 | 4 |
| Paxillin  | 4 | 4 | 4 | 4 | 4 |
| AKT       | 3 | 3 | 4 | 3 | 3 |
| GSK3      | 3 | 3 | 3 | 3 | 3 |
| S6 (S235) | 1 | 1 | 2 | 1 | 2 |
| S6 (S240) | 1 | 1 | 2 | 1 | 1 |
| PKCb      | 4 | 3 | 4 | 3 | 4 |
| PKCd      | 4 | 4 | 4 | 4 | 4 |
| MARCKS    | 4 | 4 | 4 | 4 | 4 |
| CaM       | 3 | 3 | 3 | 4 | 4 |
| RSK3      | 4 | 2 | 3 | 3 | 4 |
| RAF       | 4 | 4 | 4 | 4 | 4 |
| MEK       | 3 | 2 | 3 | 3 | 4 |
| ERK       | 4 | 2 | 4 | 4 | 4 |
| p90RSK    | 2 | 2 | 3 | 2 | 3 |
| STAT1     | 2 | 3 | 3 | 3 | 3 |
| STAT3     | 4 | 2 | 3 | 3 | 3 |
| CREB      | 4 | 3 | 3 | 3 | 4 |
| NF-kB     | 3 | 2 | 3 | 2 | 3 |
| c-Jun     | 4 | 3 | 3 | 3 | 3 |

PTPN6 sh3

|           |   |   |   |   |   |
|-----------|---|---|---|---|---|
| EGFR Y845 | 4 | 3 | 3 | 4 | 3 |
| SHC       | 4 | 4 | 4 | 4 | 4 |
| c-Cbl     | 4 | 4 | 4 | 4 | 4 |
| Paxillin  | 4 | 4 | 3 | 4 | 4 |
| AKT       | 4 | 4 | 4 | 4 | 4 |
| GSK3      | 3 | 3 | 4 | 3 | 4 |

|           |   |   |   |   |   |
|-----------|---|---|---|---|---|
| S6 (S235) | 1 | 1 | 2 | 1 | 2 |
| S6 (S240) | 1 | 1 | 2 | 1 | 2 |
| PKCb      | 4 | 4 | 4 | 4 | 4 |
| PKCd      | 4 | 4 | 4 | 4 | 4 |
| MARCKS    | 4 | 4 | 4 | 4 | 4 |
| CaM       | 4 | 4 | 4 | 4 | 4 |
| RSK3      | 4 | 3 | 3 | 3 | 3 |
| RAF       | 4 | 4 | 4 | 3 | 4 |
| MEK       | 3 | 3 | 3 | 3 | 4 |
| ERK       | 4 | 4 | 4 | 4 | 4 |
| p90RSK    | 2 | 3 | 4 | 3 | 4 |
| STAT1     | 4 | 4 | 4 | 4 | 4 |
| STAT3     | 4 | 4 | 4 | 4 | 4 |
| CREB      | 4 | 4 | 3 | 3 | 4 |
| NF-kB     | 3 | 3 | 3 | 3 | 4 |
| c-Jun     | 4 | 3 | 2 | 3 | 3 |

PTPN11 sh1

|           |   |   |   |   |   |
|-----------|---|---|---|---|---|
| EGFR Y845 | 3 | 3 | 3 | 4 | 3 |
| SHC       | 3 | 4 | 3 | 4 | 3 |
| c-Cbl     | 4 | 4 | 3 | 4 | 3 |
| Paxillin  | 4 | 4 | 4 | 4 | 4 |
| AKT       | 4 | 3 | 3 | 4 | 3 |
| GSK3      | 4 | 4 | 4 | 4 | 3 |
| S6 (S235) | 2 | 2 | 3 | 1 | 2 |
| S6 (S240) | 1 | 1 | 2 | 1 | 2 |
| PKCb      | 4 | 4 | 4 | 3 | 4 |
| PKCd      | 3 | 3 | 3 | 4 | 3 |
| MARCKS    | 4 | 4 | 4 | 4 | 3 |
| CaM       | 3 | 3 | 3 | 4 | 3 |
| RSK3      | 4 | 3 | 4 | 3 | 3 |
| RAF       | 4 | 3 | 4 | 3 | 3 |
| MEK       | 3 | 2 | 3 | 3 | 3 |
| ERK       | 3 | 3 | 4 | 3 | 4 |
| p90RSK    | 2 | 2 | 3 | 3 | 4 |
| STAT1     | 2 | 3 | 3 | 3 | 3 |
| STAT3     | 3 | 4 | 2 | 4 | 3 |
| CREB      | 4 | 4 | 4 | 3 | 3 |
| NF-kB     | 4 | 3 | 3 | 3 | 4 |
| c-Jun     | 4 | 3 | 3 | 3 | 3 |

PTPN11 sh4

|           |   |   |   |   |   |
|-----------|---|---|---|---|---|
| EGFR Y845 | 3 | 3 | 3 | 4 | 3 |
| SHC       | 4 | 4 | 4 | 4 | 3 |
| c-Cbl     | 4 | 3 | 3 | 4 | 2 |

|           |   |   |   |   |   |
|-----------|---|---|---|---|---|
| Paxillin  | 4 | 4 | 4 | 4 | 3 |
| AKT       | 4 | 3 | 3 | 3 | 4 |
| GSK3      | 4 | 4 | 4 | 4 | 4 |
| S6 (S235) | 3 | 3 | 4 | 2 | 3 |
| S6 (S240) | 3 | 2 | 3 | 2 | 3 |
| PKCb      | 3 | 4 | 4 | 3 | 4 |
| PKCd      | 4 | 4 | 4 | 4 | 3 |
| MARCKS    | 3 | 3 | 3 | 4 | 3 |
| CaM       | 3 | 3 | 3 | 3 | 3 |
| RSK3      | 4 | 3 | 3 | 3 | 3 |
| RAF       | 4 | 4 | 3 | 3 | 3 |
| MEK       | 3 | 4 | 4 | 4 | 3 |
| ERK       | 4 | 4 | 4 | 3 | 3 |
| p90RSK    | 2 | 2 | 4 | 2 | 4 |
| STAT1     | 3 | 4 | 3 | 4 | 3 |
| STAT3     | 3 | 3 | 3 | 4 | 3 |
| CREB      | 3 | 4 | 3 | 3 | 3 |
| NF-kB     | 3 | 3 | 3 | 4 | 3 |
| c-Jun     | 4 | 4 | 3 | 3 | 3 |

PTPN pool

|           |   |   |   |   |   |
|-----------|---|---|---|---|---|
| EGFR Y845 | 4 | 4 | 3 | 4 | 4 |
| SHC       | 4 | 4 | 4 | 4 | 4 |
| c-Cbl     | 4 | 4 | 3 | 4 | 4 |
| Paxillin  | 4 | 4 | 3 | 4 | 4 |
| AKT       | 4 | 4 | 4 | 4 | 4 |
| GSK3      | 4 | 4 | 4 | 4 | 4 |
| S6 (S235) | 1 | 2 | 3 | 1 | 2 |
| S6 (S240) | 1 | 2 | 4 | 2 | 2 |
| PKCb      | 4 | 3 | 4 | 3 | 4 |
| PKCd      | 4 | 4 | 3 | 4 | 4 |
| MARCKS    | 3 | 3 | 3 | 4 | 4 |
| CaM       | 4 | 4 | 4 | 4 | 4 |
| RSK3      | 4 | 2 | 4 | 4 | 4 |
| RAF       | 4 | 4 | 3 | 3 | 4 |
| MEK       | 4 | 2 | 3 | 3 | 3 |
| ERK       | 3 | 2 | 4 | 4 | 4 |
| p90RSK    | 2 | 2 | 2 | 2 | 3 |
| STAT1     | 3 | 4 | 3 | 4 | 4 |
| STAT3     | 4 | 4 | 4 | 4 | 4 |
| CREB      | 3 | 3 | 3 | 3 | 4 |
| NF-kB     | 3 | 2 | 3 | 4 | 4 |
| c-Jun     | 4 | 3 | 3 | 3 | 3 |

PTEN sh1

|           |   |   |   |   |   |
|-----------|---|---|---|---|---|
| EGFR Y845 | 4 | 3 | 1 | 3 | 1 |
| SHC       | 3 | 3 | 2 | 3 | 2 |
| c-Cbl     | 3 | 4 | 1 | 2 | 1 |
| Paxillin  | 2 | 4 | 2 | 3 | 2 |
| AKT       | 3 | 4 | 2 | 3 | 2 |
| GSK3      | 3 | 3 | 2 | 3 | 2 |
| S6 (S235) | 2 | 2 | 3 | 2 | 2 |
| S6 (S240) | 3 | 2 | 4 | 3 | 2 |
| PKCb      | 3 | 3 | 3 | 3 | 2 |
| PKCd      | 4 | 4 | 2 | 3 | 2 |
| MARCKS    | 3 | 4 | 2 | 3 | 2 |
| CaM       | 4 | 4 | 2 | 3 | 2 |
| RSK3      | 3 | 3 | 1 | 2 | 1 |
| RAF       | 4 | 4 | 2 | 2 | 2 |
| MEK       | 4 | 2 | 2 | 2 | 2 |
| ERK       | 4 | 3 | 3 | 3 | 2 |
| p90RSK    | 3 | 2 | 3 | 2 | 3 |
| STAT1     | 3 | 3 | 2 | 2 | 2 |
| STAT3     | 3 | 3 | 2 | 3 | 2 |
| CREB      | 2 | 3 | 1 | 2 | 1 |
| NF-kB     | 2 | 2 | 1 | 1 | 1 |
| c-Jun     | 2 | 3 | 1 | 2 | 1 |

PTEN sh4

|           |   |   |   |   |   |
|-----------|---|---|---|---|---|
| EGFR Y845 | 3 | 2 | 2 | 2 | 2 |
| SHC       | 3 | 2 | 2 | 3 | 2 |
| c-Cbl     | 2 | 2 | 2 | 2 | 2 |
| Paxillin  | 2 | 2 | 2 | 3 | 2 |
| AKT       | 3 | 3 | 4 | 4 | 3 |
| GSK3      | 3 | 3 | 3 | 3 | 2 |
| S6 (S235) | 3 | 3 | 3 | 2 | 2 |
| S6 (S240) | 3 | 3 | 4 | 2 | 3 |
| PKCb      | 2 | 2 | 3 | 2 | 3 |
| PKCd      | 3 | 3 | 3 | 3 | 3 |
| MARCKS    | 3 | 3 | 3 | 3 | 3 |
| CaM       | 4 | 4 | 3 | 3 | 3 |
| RSK3      | 2 | 2 | 2 | 3 | 2 |
| RAF       | 3 | 3 | 2 | 3 | 2 |
| MEK       | 3 | 1 | 2 | 2 | 2 |
| ERK       | 3 | 2 | 3 | 3 | 3 |
| p90RSK    | 2 | 2 | 3 | 2 | 2 |
| STAT1     | 3 | 2 | 2 | 2 | 2 |
| STAT3     | 3 | 3 | 2 | 3 | 2 |
| CREB      | 1 | 1 | 1 | 2 | 2 |
| NF-kB     | 1 | 1 | 2 | 2 | 2 |
| c-Jun     | 3 | 3 | 2 | 2 | 2 |

All phosphatases

|           |   |   |   |   |   |
|-----------|---|---|---|---|---|
| EGFR Y845 | 4 | 3 | 3 | 4 | 3 |
| SHC       | 3 | 4 | 3 | 4 | 4 |
| c-Cbl     | 3 | 4 | 4 | 4 | 4 |
| Paxillin  | 4 | 4 | 4 | 4 | 4 |
| AKT       | 3 | 3 | 4 | 4 | 4 |
| GSK3      | 3 | 4 | 4 | 4 | 4 |
| S6 (S235) | 1 | 2 | 4 | 1 | 2 |
| S6 (S240) | 1 | 2 | 4 | 2 | 2 |
| PKCb      | 4 | 3 | 4 | 4 | 4 |
| PKCd      | 3 | 3 | 3 | 4 | 3 |
| MARCKS    | 3 | 4 | 4 | 4 | 4 |
| CaM       | 3 | 3 | 4 | 4 | 4 |
| RSK3      | 4 | 3 | 4 | 4 | 4 |
| RAF       | 3 | 4 | 3 | 3 | 3 |
| MEK       | 3 | 2 | 3 | 3 | 4 |
| ERK       | 3 | 2 | 4 | 3 | 4 |
| p90RSK    | 1 | 2 | 2 | 2 | 3 |
| STAT1     | 3 | 4 | 3 | 4 | 3 |
| STAT3     | 4 | 4 | 3 | 4 | 3 |
| CREB      | 3 | 3 | 3 | 3 | 4 |
| NF-kB     | 3 | 2 | 3 | 4 | 4 |
| c-Jun     | 3 | 3 | 3 | 4 | 4 |

GRB sh3

|           |   |   |   |   |   |
|-----------|---|---|---|---|---|
| EGFR Y845 | 1 | 1 | 1 | 1 | 1 |
| SHC       | 2 | 2 | 1 | 2 | 2 |
| c-Cbl     | 1 | 1 | 1 | 1 | 1 |
| Paxillin  | 1 | 1 | 1 | 1 | 1 |
| AKT       | 2 | 3 | 2 | 2 | 2 |
| GSK3      | 2 | 3 | 2 | 2 | 2 |
| S6 (S235) | 2 | 3 | 2 | 1 | 1 |
| S6 (S240) | 2 | 2 | 2 | 1 | 1 |
| PKCb      | 1 | 1 | 2 | 1 | 1 |
| PKCd      | 2 | 2 | 2 | 2 | 2 |
| MARCKS    | 2 | 2 | 2 | 2 | 2 |
| CaM       | 1 | 1 | 1 | 1 | 1 |
| RSK3      | 1 | 1 | 1 | 1 | 1 |
| RAF       | 2 | 2 | 2 | 2 | 2 |
| MEK       | 1 | 1 | 2 | 1 | 1 |
| ERK       | 2 | 2 | 3 | 2 | 2 |
| p90RSK    | 3 | 2 | 3 | 2 | 2 |
| STAT1     | 1 | 1 | 1 | 1 | 1 |
| STAT3     | 1 | 2 | 1 | 2 | 1 |
| CREB      | 1 | 1 | 1 | 1 | 1 |

|       |   |   |   |   |   |
|-------|---|---|---|---|---|
| NF-kB | 1 | 1 | 1 | 1 | 1 |
| c-Jun | 1 | 1 | 1 | 1 | 1 |

GRB sh4

|           |   |   |   |   |   |
|-----------|---|---|---|---|---|
| EGFR Y845 | 3 | 3 | 1 | 2 | 2 |
| SHC       | 4 | 3 | 2 | 3 | 2 |
| c-Cbl     | 3 | 4 | 2 | 2 | 2 |
| Paxillin  | 2 | 4 | 2 | 3 | 2 |
| AKT       | 2 | 3 | 3 | 3 | 3 |
| GSK3      | 2 | 3 | 3 | 3 | 2 |
| S6 (S235) | 1 | 1 | 3 | 1 | 2 |
| S6 (S240) | 2 | 2 | 3 | 2 | 2 |
| PKCb      | 2 | 3 | 2 | 2 | 2 |
| PKCd      | 4 | 3 | 2 | 3 | 2 |
| MARCKS    | 3 | 4 | 2 | 3 | 2 |
| CaM       | 4 | 4 | 2 | 3 | 2 |
| RSK3      | 2 | 2 | 1 | 2 | 2 |
| RAF       | 3 | 4 | 3 | 3 | 2 |
| MEK       | 2 | 2 | 2 | 2 | 2 |
| ERK       | 3 | 2 | 3 | 3 | 3 |
| p90RSK    | 1 | 2 | 3 | 2 | 3 |
| STAT1     | 4 | 4 | 2 | 2 | 2 |
| STAT3     | 4 | 4 | 3 | 3 | 3 |
| CREB      | 1 | 2 | 2 | 3 | 3 |
| NF-kB     | 3 | 2 | 2 | 3 | 1 |
| c-Jun     | 2 | 3 | 1 | 2 | 1 |

SHC1 52 sh2

|           |   |   |   |   |   |
|-----------|---|---|---|---|---|
| EGFR Y845 | 3 | 1 | 2 | 2 | 2 |
| SHC       | 1 | 1 | 1 | 1 | 1 |
| c-Cbl     | 3 | 3 | 3 | 3 | 3 |
| Paxillin  | 3 | 2 | 3 | 4 | 3 |
| AKT       | 3 | 2 | 3 | 3 | 3 |
| GSK3      | 3 | 3 | 3 | 3 | 3 |
| S6 (S235) | 2 | 2 | 3 | 1 | 2 |
| S6 (S240) | 1 | 2 | 3 | 2 | 2 |
| PKCb      | 3 | 2 | 3 | 2 | 3 |
| PKCd      | 4 | 3 | 3 | 3 | 3 |
| MARCKS    | 2 | 2 | 2 | 2 | 2 |
| CaM       | 2 | 2 | 3 | 3 | 2 |
| RSK3      | 2 | 1 | 2 | 2 | 2 |
| RAF       | 3 | 3 | 3 | 3 | 3 |
| MEK       | 3 | 2 | 2 | 2 | 3 |
| ERK       | 3 | 2 | 3 | 3 | 3 |
| p90RSK    | 3 | 3 | 3 | 2 | 2 |

|       |   |   |   |   |   |
|-------|---|---|---|---|---|
| STAT1 | 2 | 2 | 3 | 2 | 2 |
| STAT3 | 3 | 2 | 3 | 3 | 3 |
| CREB  | 2 | 2 | 2 | 2 | 2 |
| NF-kB | 4 | 3 | 4 | 4 | 4 |
| c-Jun | 3 | 2 | 2 | 2 | 2 |

SHC1 52 sh3

|           |   |   |   |   |   |
|-----------|---|---|---|---|---|
| EGFR Y845 | 4 | 3 | 3 | 4 | 4 |
| SHC       | 1 | 1 | 1 | 1 | 1 |
| c-Cbl     | 4 | 4 | 4 | 4 | 4 |
| Paxillin  | 4 | 3 | 3 | 4 | 4 |
| AKT       | 4 | 2 | 3 | 3 | 4 |
| GSK3      | 3 | 3 | 3 | 3 | 3 |
| S6 (S235) | 1 | 1 | 2 | 1 | 1 |
| S6 (S240) | 1 | 1 | 2 | 1 | 2 |
| PKCb      | 4 | 3 | 4 | 3 | 4 |
| PKCd      | 4 | 4 | 4 | 4 | 4 |
| MARCKS    | 3 | 3 | 3 | 3 | 3 |
| CaM       | 4 | 4 | 4 | 4 | 4 |
| RSK3      | 3 | 2 | 3 | 3 | 4 |
| RAF       | 4 | 4 | 4 | 3 | 4 |
| MEK       | 3 | 2 | 3 | 2 | 3 |
| ERK       | 4 | 2 | 3 | 3 | 4 |
| p90RSK    | 1 | 3 | 4 | 3 | 3 |
| STAT1     | 3 | 4 | 4 | 4 | 4 |
| STAT3     | 4 | 3 | 4 | 4 | 4 |
| CREB      | 3 | 3 | 3 | 3 | 4 |
| NF-kB     | 2 | 1 | 1 | 2 | 3 |
| c-Jun     | 3 | 3 | 3 | 3 | 3 |

SRC sh1

|           |   |   |   |   |   |
|-----------|---|---|---|---|---|
| EGFR Y845 | 1 | 1 | 1 | 1 | 1 |
| SHC       | 1 | 1 | 1 | 1 | 1 |
| c-Cbl     | 1 | 1 | 1 | 1 | 1 |
| Paxillin  | 1 | 1 | 1 | 1 | 1 |
| AKT       | 1 | 1 | 1 | 1 | 1 |
| GSK3      | 1 | 1 | 1 | 1 | 1 |
| S6 (S235) | 1 | 1 | 1 | 1 | 1 |
| S6 (S240) | 1 | 1 | 1 | 1 | 1 |
| PKCb      | 2 | 1 | 1 | 1 | 1 |
| PKCd      | 2 | 2 | 2 | 2 | 2 |
| MARCKS    | 2 | 2 | 2 | 2 | 2 |
| CaM       | 1 | 1 | 1 | 1 | 1 |
| RSK3      | 1 | 1 | 1 | 1 | 1 |
| RAF       | 2 | 2 | 2 | 2 | 2 |

|        |   |   |   |   |   |
|--------|---|---|---|---|---|
| MEK    | 1 | 1 | 1 | 1 | 1 |
| ERK    | 1 | 1 | 1 | 1 | 1 |
| p90RSK | 3 | 2 | 2 | 1 | 1 |
| STAT1  | 1 | 1 | 1 | 1 | 1 |
| STAT3  | 1 | 1 | 1 | 1 | 1 |
| CREB   | 1 | 1 | 1 | 1 | 1 |
| NF-kB  | 1 | 1 | 1 | 1 | 1 |
| c-Jun  | 1 | 1 | 1 | 1 | 1 |

SRC sh2

|           |   |   |   |   |   |
|-----------|---|---|---|---|---|
| EGFR Y845 | 3 | 2 | 2 | 3 | 3 |
| SHC       | 3 | 3 | 3 | 4 | 3 |
| c-Cbl     | 4 | 3 | 3 | 4 | 3 |
| Paxillin  | 3 | 3 | 3 | 4 | 3 |
| AKT       | 3 | 2 | 4 | 3 | 4 |
| GSK3      | 4 | 3 | 3 | 3 | 3 |
| S6 (S235) | 2 | 2 | 3 | 1 | 2 |
| S6 (S240) | 1 | 1 | 2 | 2 | 2 |
| PKCb      | 3 | 3 | 4 | 3 | 4 |
| PKCd      | 3 | 3 | 3 | 3 | 3 |
| MARCKS    | 3 | 3 | 3 | 4 | 3 |
| CaM       | 3 | 3 | 3 | 3 | 3 |
| RSK3      | 2 | 2 | 2 | 3 | 3 |
| RAF       | 3 | 3 | 4 | 3 | 3 |
| MEK       | 2 | 3 | 3 | 2 | 3 |
| ERK       | 3 | 3 | 4 | 4 | 4 |
| p90RSK    | 2 | 2 | 3 | 2 | 3 |
| STAT1     | 3 | 3 | 3 | 3 | 3 |
| STAT3     | 3 | 3 | 2 | 3 | 3 |
| CREB      | 3 | 3 | 2 | 3 | 3 |
| NF-kB     | 2 | 2 | 1 | 2 | 1 |
| c-Jun     | 3 | 3 | 3 | 3 | 4 |

PLKO.T

|           |   |   |   |   |   |
|-----------|---|---|---|---|---|
| EGFR Y845 | 3 | 3 | 3 | 4 | 4 |
| SHC       | 4 | 4 | 3 | 4 | 4 |
| c-Cbl     | 4 | 4 | 3 | 3 | 3 |
| Paxillin  | 4 | 4 | 4 | 4 | 3 |
| AKT       | 3 | 2 | 3 | 3 | 3 |
| GSK3      | 4 | 4 | 4 | 3 | 3 |
| S6 (S235) | 1 | 1 | 2 | 1 | 2 |
| S6 (S240) | 1 | 1 | 2 | 1 | 2 |
| PKCb      | 3 | 3 | 4 | 4 | 4 |
| PKCd      | 4 | 3 | 3 | 3 | 3 |
| MARCKS    | 4 | 4 | 4 | 4 | 4 |

|        |   |   |   |   |   |
|--------|---|---|---|---|---|
| CaM    | 3 | 3 | 3 | 3 | 3 |
| RSK3   | 4 | 3 | 4 | 4 | 4 |
| RAF    | 4 | 4 | 3 | 3 | 3 |
| MEK    | 3 | 2 | 4 | 4 | 4 |
| ERK    | 4 | 3 | 4 | 3 | 4 |
| p90RSK | 3 | 2 | 3 | 3 | 4 |
| STAT1  | 2 | 3 | 3 | 3 | 2 |
| STAT3  | 3 | 3 | 3 | 3 | 3 |
| CREB   | 4 | 4 | 3 | 4 | 4 |
| NF-kB  | 3 | 2 | 2 | 2 | 2 |
| c-Jun  | 3 | 3 | 3 | 3 | 3 |

shGFP477

|           |   |   |   |   |   |
|-----------|---|---|---|---|---|
| EGFR Y845 | 3 | 2 | 2 | 2 | 2 |
| SHC       | 3 | 3 | 2 | 2 | 2 |
| c-Cbl     | 3 | 2 | 2 | 2 | 2 |
| Paxillin  | 3 | 4 | 3 | 3 | 3 |
| AKT       | 3 | 2 | 4 | 3 | 3 |
| GSK3      | 2 | 2 | 3 | 2 | 2 |
| S6 (S235) | 1 | 1 | 3 | 1 | 2 |
| S6 (S240) | 1 | 1 | 3 | 2 | 2 |
| PKCb      | 3 | 3 | 3 | 2 | 3 |
| PKCd      | 2 | 3 | 2 | 2 | 2 |
| MARCKS    | 3 | 4 | 3 | 3 | 3 |
| CaM       | 3 | 3 | 3 | 3 | 2 |
| RSK3      | 3 | 2 | 3 | 3 | 2 |
| RAF       | 2 | 3 | 2 | 2 | 2 |
| MEK       | 2 | 2 | 3 | 2 | 2 |
| ERK       | 2 | 2 | 3 | 3 | 4 |
| p90RSK    | 2 | 2 | 3 | 2 | 3 |
| STAT1     | 2 | 2 | 2 | 1 | 2 |
| STAT3     | 3 | 3 | 2 | 2 | 2 |
| CREB      | 2 | 2 | 2 | 2 | 2 |
| NF-kB     | 1 | 1 | 1 | 1 | 1 |
| c-Jun     | 3 | 3 | 2 | 2 | 2 |

shGFP49

|           |   |   |   |   |   |
|-----------|---|---|---|---|---|
| EGFR Y845 | 2 | 2 | 1 | 1 | 1 |
| SHC       | 2 | 2 | 1 | 2 | 2 |
| c-Cbl     | 2 | 3 | 1 | 1 | 1 |
| Paxillin  | 2 | 3 | 1 | 2 | 2 |
| AKT       | 2 | 3 | 2 | 3 | 2 |
| GSK3      | 2 | 3 | 2 | 2 | 2 |
| S6 (S235) | 2 | 3 | 3 | 1 | 2 |
| S6 (S240) | 3 | 2 | 2 | 1 | 1 |

|        |   |   |   |   |   |
|--------|---|---|---|---|---|
| PKCb   | 2 | 3 | 3 | 2 | 2 |
| PKCd   | 2 | 3 | 2 | 2 | 2 |
| MARCKS | 2 | 2 | 2 | 2 | 2 |
| CaM    | 2 | 2 | 1 | 2 | 1 |
| RSK3   | 2 | 2 | 1 | 2 | 1 |
| RAF    | 2 | 3 | 2 | 2 | 2 |
| MEK    | 2 | 2 | 2 | 2 | 2 |
| ERK    | 2 | 2 | 2 | 1 | 1 |
| p90RSK | 3 | 2 | 3 | 2 | 3 |
| STAT1  | 1 | 2 | 1 | 1 | 1 |
| STAT3  | 2 | 2 | 1 | 2 | 2 |
| CREB   | 1 | 2 | 1 | 2 | 2 |
| NF-kB  | 1 | 1 | 1 | 1 | 1 |
| c-Jun  | 1 | 3 | 1 | 1 | 1 |

| 16 | 32 | 64 | 96 | 128 | 256 |
|----|----|----|----|-----|-----|
| 2  | 2  | 1  | 2  | 2   | 3   |
| 3  | 3  | 2  | 3  | 3   | 3   |
| 2  | 2  | 2  | 3  | 3   | 4   |
| 3  | 2  | 2  | 3  | 3   | 4   |
| 2  | 2  | 1  | 2  | 2   | 2   |
| 1  | 1  | 1  | 2  | 1   | 1   |
| 2  | 2  | 2  | 3  | 3   | 4   |
| 1  | 1  | 1  | 2  | 2   | 4   |
| 3  | 3  | 3  | 4  | 3   | 3   |
| 3  | 3  | 2  | 3  | 3   | 3   |
| 3  | 3  | 3  | 3  | 3   | 4   |
| 2  | 2  | 2  | 3  | 3   | 3   |
| 2  | 2  | 2  | 3  | 2   | 3   |
| 2  | 2  | 2  | 3  | 3   | 4   |
| 2  | 2  | 2  | 3  | 3   | 3   |
| 2  | 3  | 2  | 3  | 2   | 3   |
| 3  | 4  | 3  | 3  | 3   | 3   |
| 4  | 3  | 4  | 3  | 3   | 2   |
| 2  | 2  | 1  | 3  | 2   | 3   |
| 2  | 1  | 1  | 2  | 2   | 3   |
| 3  | 3  | 2  | 3  | 3   | 4   |
| 1  | 2  | 1  | 2  | 2   | 4   |
| 2  | 1  | 1  | 1  | 2   | 3   |

|   |   |   |   |   |   |
|---|---|---|---|---|---|
| 3 | 3 | 3 | 3 | 4 | 4 |
| 3 | 4 | 3 | 3 | 4 | 4 |
| 3 | 3 | 3 | 3 | 4 | 4 |
| 4 | 3 | 3 | 3 | 4 | 4 |
| 2 | 2 | 2 | 2 | 1 | 2 |
| 1 | 1 | 1 | 2 | 1 | 2 |
| 1 | 1 | 2 | 3 | 3 | 3 |
| 1 | 1 | 1 | 2 | 2 | 3 |
| 4 | 4 | 4 | 4 | 3 | 4 |
| 4 | 3 | 3 | 3 | 4 | 4 |
| 3 | 3 | 3 | 3 | 4 | 4 |
| 3 | 3 | 3 | 3 | 3 | 4 |
| 3 | 2 | 2 | 3 | 3 | 3 |
| 4 | 3 | 3 | 4 | 4 | 4 |
| 4 | 4 | 3 | 3 | 4 | 4 |
| 3 | 4 | 4 | 4 | 4 | 4 |
| 4 | 4 | 4 | 3 | 4 | 4 |
| 3 | 4 | 4 | 4 | 4 | 4 |
| 4 | 4 | 4 | 3 | 3 | 4 |
| 3 | 3 | 3 | 4 | 4 | 4 |
| 3 | 2 | 2 | 3 | 4 | 4 |

|   |   |   |   |   |   |   |
|---|---|---|---|---|---|---|
| 4 | 4 | 3 | 4 | 4 | 4 | 4 |
| 2 | 2 | 2 | 2 | 2 | 3 | 4 |
| 3 | 2 | 1 | 2 | 2 | 2 | 4 |

|   |   |   |   |   |   |
|---|---|---|---|---|---|
| 2 | 2 | 1 | 1 | 2 | 4 |
| 3 | 3 | 2 | 3 | 3 | 4 |
| 2 | 2 | 2 | 2 | 2 | 4 |
| 3 | 2 | 2 | 3 | 3 | 4 |
| 1 | 1 | 1 | 1 | 1 | 1 |
| 1 | 1 | 1 | 1 | 1 | 1 |
| 4 | 2 | 2 | 3 | 2 | 3 |
| 4 | 2 | 2 | 3 | 3 | 4 |
| 3 | 3 | 2 | 2 | 2 | 3 |
| 3 | 3 | 2 | 3 | 3 | 4 |
| 3 | 3 | 3 | 3 | 3 | 4 |
| 3 | 2 | 2 | 3 | 2 | 4 |
| 3 | 3 | 2 | 3 | 4 | 4 |
| 4 | 3 | 2 | 3 | 2 | 4 |
| 3 | 3 | 2 | 2 | 2 | 3 |
| 3 | 3 | 2 | 3 | 2 | 3 |
| 2 | 3 | 2 | 2 | 2 | 1 |
| 3 | 2 | 3 | 3 | 3 | 4 |
| 3 | 2 | 1 | 2 | 2 | 3 |
| 2 | 2 | 1 | 1 | 2 | 4 |
| 1 | 2 | 2 | 2 | 2 | 3 |
| 3 | 1 | 1 | 1 | 2 | 4 |

|   |   |   |   |   |   |
|---|---|---|---|---|---|
| 1 | 1 | 1 | 1 | 1 | 2 |
| 2 | 3 | 2 | 3 | 2 | 3 |
| 1 | 1 | 1 | 2 | 2 | 3 |
| 2 | 1 | 1 | 1 | 1 | 2 |
| 1 | 1 | 1 | 1 | 1 | 1 |
| 1 | 1 | 1 | 1 | 1 | 1 |
| 3 | 2 | 1 | 2 | 1 | 3 |
| 3 | 1 | 1 | 2 | 1 | 3 |
| 2 | 3 | 2 | 2 | 2 | 3 |
| 3 | 3 | 2 | 3 | 3 | 4 |
| 2 | 2 | 2 | 2 | 2 | 3 |
| 2 | 2 | 2 | 3 | 2 | 3 |
| 1 | 1 | 1 | 2 | 1 | 3 |
| 2 | 2 | 2 | 2 | 2 | 3 |
| 2 | 1 | 1 | 1 | 1 | 2 |
| 3 | 3 | 2 | 3 | 2 | 3 |

|   |   |   |   |   |   |
|---|---|---|---|---|---|
| 3 | 3 | 3 | 3 | 4 | 2 |
| 2 | 3 | 2 | 3 | 2 | 4 |
| 3 | 3 | 3 | 3 | 3 | 3 |
| 2 | 1 | 1 | 1 | 1 | 3 |
| 2 | 2 | 2 | 2 | 2 | 3 |
| 1 | 1 | 1 | 1 | 1 | 1 |

|   |   |   |   |   |   |
|---|---|---|---|---|---|
| 2 | 1 | 1 | 2 | 2 | 3 |
| 2 | 3 | 2 | 3 | 3 | 3 |
| 2 | 2 | 1 | 1 | 2 | 3 |
| 2 | 2 | 2 | 1 | 2 | 4 |
| 1 | 1 | 1 | 1 | 1 | 1 |
| 1 | 1 | 1 | 1 | 1 | 1 |
| 3 | 2 | 2 | 2 | 2 | 3 |
| 3 | 2 | 2 | 2 | 2 | 4 |
| 2 | 2 | 2 | 2 | 2 | 3 |
| 2 | 2 | 2 | 3 | 2 | 3 |
| 2 | 2 | 2 | 2 | 2 | 3 |
| 1 | 2 | 2 | 2 | 2 | 3 |
| 2 | 1 | 1 | 2 | 2 | 3 |
| 2 | 2 | 2 | 2 | 2 | 4 |
| 2 | 2 | 2 | 2 | 2 | 3 |
| 3 | 3 | 2 | 2 | 2 | 3 |
| 2 | 3 | 2 | 2 | 2 | 2 |
| 1 | 2 | 1 | 2 | 2 | 3 |
| 1 | 1 | 1 | 1 | 1 | 3 |
| 1 | 1 | 1 | 1 | 1 | 3 |
| 1 | 1 | 1 | 1 | 1 | 3 |
| 2 | 1 | 1 | 1 | 1 | 2 |

|   |   |   |   |   |   |
|---|---|---|---|---|---|
| 1 | 2 | 1 | 1 | 2 | 3 |
| 2 | 2 | 2 | 2 | 2 | 3 |
| 2 | 2 | 2 | 2 | 2 | 4 |
| 2 | 2 | 2 | 2 | 2 | 4 |
| 1 | 1 | 1 | 1 | 1 | 1 |
| 1 | 1 | 1 | 1 | 1 | 1 |
| 3 | 2 | 2 | 3 | 1 | 4 |
| 3 | 1 | 2 | 2 | 2 | 4 |
| 2 | 3 | 2 | 2 | 2 | 3 |
| 2 | 2 | 2 | 2 | 2 | 3 |
| 2 | 2 | 2 | 3 | 2 | 3 |
| 2 | 2 | 2 | 1 | 2 | 3 |
| 2 | 2 | 2 | 2 | 2 | 4 |

|   |   |   |   |   |   |   |
|---|---|---|---|---|---|---|
| 2 | 2 | 2 | 2 | 2 | 2 | 3 |
| 2 | 2 | 2 | 2 | 2 | 1 | 3 |
| 2 | 3 | 2 | 2 | 2 | 2 | 3 |
| 2 | 3 | 3 | 2 | 2 | 3 | 1 |
| 1 | 1 | 2 | 2 | 2 | 2 | 3 |
| 1 | 2 | 1 | 1 | 1 | 1 | 3 |
| 2 | 2 | 2 | 2 | 2 | 1 | 4 |
| 1 | 2 | 1 | 1 | 1 | 1 | 2 |
| 1 | 1 | 1 | 1 | 1 | 1 | 3 |

|   |   |   |   |   |   |
|---|---|---|---|---|---|
| 4 | 4 | 2 | 2 | 3 | 3 |
| 3 | 4 | 3 | 3 | 3 | 3 |
| 4 | 3 | 3 | 3 | 3 | 4 |
| 4 | 4 | 3 | 4 | 4 | 4 |
| 1 | 2 | 1 | 1 | 1 | 1 |
| 2 | 2 | 2 | 2 | 2 | 2 |
| 4 | 4 | 4 | 4 | 4 | 3 |
| 4 | 3 | 3 | 4 | 4 | 4 |
| 4 | 4 | 3 | 3 | 3 | 3 |
| 3 | 3 | 3 | 3 | 3 | 4 |
| 3 | 4 | 4 | 4 | 4 | 4 |
| 3 | 3 | 3 | 3 | 3 | 4 |
| 4 | 4 | 3 | 3 | 4 | 4 |
| 4 | 4 | 3 | 3 | 4 | 4 |
| 4 | 3 | 3 | 3 | 3 | 4 |
| 4 | 4 | 4 | 4 | 4 | 4 |
| 4 | 3 | 3 | 3 | 3 | 3 |
| 4 | 4 | 4 | 3 | 4 | 3 |
| 4 | 3 | 4 | 3 | 3 | 3 |
| 3 | 3 | 2 | 2 | 3 | 4 |
| 3 | 3 | 3 | 2 | 3 | 3 |
| 3 | 3 | 2 | 2 | 2 | 3 |
| 1 | 2 | 1 | 2 | 2 | 3 |
| 3 | 2 | 2 | 2 | 2 | 3 |

|   |   |   |   |   |   |
|---|---|---|---|---|---|
| 4 | 4 | 3 | 3 | 3 | 4 |
| 4 | 4 | 4 | 3 | 3 | 4 |
| 3 | 3 | 3 | 3 | 3 | 4 |
| 4 | 3 | 3 | 3 | 2 | 4 |
| 1 | 1 | 1 | 1 | 1 | 1 |
| 2 | 2 | 2 | 1 | 1 | 2 |
| 4 | 4 | 4 | 4 | 4 | 4 |
| 4 | 2 | 4 | 4 | 3 | 4 |
| 4 | 4 | 4 | 3 | 3 | 4 |
| 3 | 3 | 3 | 3 | 3 | 4 |

|   |   |   |   |   |   |
|---|---|---|---|---|---|
| 4 | 4 | 3 | 3 | 4 | 4 |
| 3 | 3 | 3 | 3 | 3 | 4 |
| 3 | 4 | 2 | 2 | 2 | 4 |
| 4 | 3 | 4 | 3 | 3 | 4 |
| 4 | 4 | 3 | 3 | 3 | 4 |
| 4 | 4 | 4 | 3 | 3 | 4 |
| 3 | 3 | 4 | 4 | 3 | 2 |
| 3 | 3 | 3 | 3 | 3 | 4 |
| 3 | 3 | 3 | 2 | 1 | 3 |
| 4 | 4 | 3 | 2 | 2 | 4 |
| 3 | 3 | 3 | 2 | 3 | 4 |
| 4 | 2 | 2 | 2 | 2 | 3 |

|   |   |   |   |   |   |
|---|---|---|---|---|---|
| 1 | 1 | 1 | 1 | 1 | 2 |
| 2 | 2 | 2 | 2 | 2 | 3 |
| 1 | 1 | 1 | 1 | 1 | 2 |
| 1 | 1 | 1 | 1 | 1 | 2 |
| 1 | 1 | 1 | 1 | 1 | 1 |
| 1 | 1 | 1 | 1 | 1 | 1 |
| 3 | 1 | 1 | 1 | 1 | 2 |
| 3 | 1 | 1 | 1 | 1 | 3 |
| 2 | 2 | 2 | 1 | 1 | 2 |
| 2 | 2 | 2 | 2 | 2 | 3 |
| 2 | 2 | 2 | 2 | 2 | 2 |
| 1 | 1 | 1 | 1 | 1 | 2 |
| 1 | 1 | 1 | 1 | 1 | 2 |
| 2 | 1 | 2 | 2 | 2 | 2 |
| 1 | 1 | 1 | 1 | 1 | 2 |
| 2 | 2 | 2 | 2 | 2 | 2 |
| 1 | 3 | 3 | 2 | 1 | 1 |
| 2 | 1 | 1 | 1 | 1 | 2 |
| 2 | 1 | 1 | 1 | 1 | 2 |
| 1 | 1 | 2 | 2 | 2 | 3 |
| 1 | 1 | 1 | 1 | 1 | 1 |

|   |   |   |   |   |   |
|---|---|---|---|---|---|
| 1 | 2 | 1 | 1 | 1 | 3 |
| 2 | 3 | 2 | 2 | 2 | 3 |
| 1 | 2 | 2 | 1 | 2 | 3 |
| 1 | 2 | 2 | 1 | 1 | 3 |
| 1 | 1 | 1 | 1 | 1 | 1 |
| 1 | 1 | 1 | 1 | 1 | 2 |
| 4 | 3 | 3 | 2 | 3 | 4 |

|   |   |   |   |   |   |
|---|---|---|---|---|---|
| 2 | 1 | 2 | 1 | 2 | 4 |
| 3 | 4 | 3 | 2 | 2 | 3 |
| 2 | 2 | 2 | 2 | 2 | 4 |
| 2 | 3 | 2 | 2 | 2 | 4 |
| 1 | 2 | 2 | 1 | 2 | 3 |
| 2 | 3 | 2 | 1 | 2 | 4 |
| 2 | 2 | 2 | 2 | 2 | 3 |
| 2 | 3 | 2 | 1 | 2 | 3 |
| 2 | 3 | 2 | 1 | 2 | 2 |
| 3 | 3 | 4 | 4 | 2 | 2 |
| 1 | 2 | 2 | 1 | 1 | 3 |
| 1 | 1 | 1 | 1 | 1 | 2 |
| 2 | 3 | 2 | 1 | 1 | 3 |
| 2 | 3 | 2 | 2 | 3 | 4 |
| 2 | 1 | 1 | 1 | 1 | 3 |

|   |   |   |   |   |   |
|---|---|---|---|---|---|
| 2 | 2 | 1 | 1 | 1 | 3 |
| 2 | 2 | 2 | 2 | 2 | 3 |
| 1 | 1 | 1 | 1 | 1 | 3 |
| 1 | 1 | 1 | 1 | 1 | 3 |
| 1 | 1 | 1 | 1 | 1 | 1 |
| 1 | 1 | 1 | 1 | 1 | 2 |
| 3 | 1 | 2 | 2 | 2 | 4 |
| 2 | 1 | 1 | 1 | 1 | 4 |
| 3 | 3 | 2 | 2 | 2 | 4 |
| 2 | 2 | 2 | 2 | 2 | 4 |
| 2 | 2 | 2 | 2 | 2 | 3 |
| 1 | 1 | 1 | 1 | 1 | 3 |
| 2 | 1 | 1 | 1 | 1 | 3 |
| 2 | 2 | 2 | 2 | 2 | 3 |
| 2 | 2 | 1 | 1 | 1 | 3 |
| 2 | 2 | 2 | 2 | 2 | 3 |
| 4 | 3 | 3 | 3 | 3 | 2 |
| 1 | 1 | 1 | 1 | 1 | 3 |
| 1 | 2 | 1 | 1 | 2 | 2 |
| 3 | 2 | 1 | 1 | 1 | 3 |
| 3 | 2 | 3 | 3 | 3 | 4 |
| 1 | 1 | 1 | 1 | 1 | 2 |

|   |   |   |   |   |   |
|---|---|---|---|---|---|
| 2 | 3 | 2 | 2 | 1 | 3 |
| 2 | 4 | 3 | 2 | 3 | 3 |
| 1 | 3 | 3 | 2 | 2 | 3 |
| 2 | 3 | 3 | 2 | 2 | 4 |

1  
1  
4  
3  
3  
2  
2  
2  
2  
2  
3  
2  
3  
4  
2  
2  
1  
2  
1  
2

2  
2  
4  
2  
4  
3  
4  
2  
3  
3  
3  
4  
2  
3  
3  
3  
3  
2

1  
2  
4  
3  
3  
2  
3  
2  
2  
3  
4  
4  
2  
2  
2  
2  
2  
2

2  
2  
3  
2  
2  
2  
3  
2  
2  
3  
3  
4  
1  
1  
2  
2

1  
2  
3  
2  
2  
3  
2  
2  
3  
2  
3  
2  
1  
1  
2  
2

1  
2  
4  
4  
3  
3  
4  
3  
4  
2  
3  
2  
3  
3  
2

2  
3  
2  
2  
1  
1  
3  
2  
3  
2  
2  
2  
2  
2  
2  
2  
1  
2  
4  
2  
2  
3  
1  
1

3  
4  
3  
3  
1  
2  
3  
2  
4  
3  
3  
2  
4  
3  
4  
3  
3  
4  
3  
1

2  
3  
2  
3  
1  
1  
4  
3  
3  
2  
2  
3  
2  
3  
4  
3  
2  
2  
1

1  
3  
2  
2  
1  
1  
3  
2  
3  
3  
2  
2  
3  
2  
4  
2  
2  
2  
1

1  
2  
1  
1  
2  
2  
2  
2  
1  
1  
2  
2  
3  
1  
1  
2  
1

3  
4  
4  
4  
1  
2  
4  
4  
3  
4  
4  
3  
4  
3  
3  
1  
3  
4  
4  
3

4

4

3

3

4

4

|   |   |   |   |   |   |
|---|---|---|---|---|---|
| 4 | 4 | 3 | 3 | 3 | 4 |
| 3 | 3 | 3 | 3 | 3 | 3 |
| 4 | 3 | 3 | 3 | 3 | 4 |
| 1 | 2 | 2 | 1 | 1 | 1 |
| 1 | 2 | 2 | 2 | 2 | 2 |
| 4 | 4 | 4 | 4 | 4 | 4 |
| 4 | 2 | 3 | 4 | 4 | 4 |
| 4 | 4 | 4 | 4 | 4 | 4 |
| 4 | 3 | 3 | 4 | 3 | 4 |
| 4 | 4 | 4 | 4 | 4 | 4 |
| 3 | 3 | 3 | 3 | 3 | 4 |
| 4 | 4 | 3 | 4 | 3 | 4 |
| 4 | 3 | 3 | 3 | 4 | 4 |
| 4 | 3 | 3 | 3 | 3 | 3 |
| 4 | 4 | 4 | 3 | 3 | 3 |
| 3 | 4 | 4 | 4 | 3 | 2 |
| 3 | 3 | 2 | 2 | 3 | 3 |
| 3 | 3 | 3 | 3 | 3 | 4 |
| 4 | 3 | 3 | 3 | 3 | 4 |
| 2 | 2 | 2 | 2 | 3 | 2 |
| 4 | 2 | 2 | 3 | 3 | 3 |

|   |   |   |   |   |   |
|---|---|---|---|---|---|
| 2 | 2 | 2 | 2 | 1 | 3 |
| 2 | 3 | 3 | 3 | 2 | 3 |
| 1 | 1 | 2 | 2 | 2 | 3 |
| 1 | 2 | 1 | 2 | 2 | 2 |
| 2 | 2 | 2 | 2 | 2 | 1 |
| 1 | 1 | 1 | 1 | 1 | 4 |
| 3 | 2 | 2 | 2 | 2 | 3 |
| 2 | 1 | 2 | 2 | 2 | 3 |
| 2 | 3 | 2 | 2 | 2 | 2 |
| 2 | 2 | 2 | 2 | 2 | 2 |
| 2 | 2 | 2 | 2 | 2 | 3 |
| 1 | 2 | 2 | 2 | 1 | 3 |
| 1 | 2 | 2 | 2 | 2 | 2 |
| 2 | 1 | 2 | 2 | 2 | 4 |
| 2 | 3 | 2 | 2 | 2 | 4 |
| 3 | 3 | 3 | 3 | 3 | 2 |
| 3 | 2 | 3 | 2 | 1 | 3 |
| 1 | 2 | 2 | 1 | 1 | 2 |
| 1 | 2 | 2 | 2 | 1 | 3 |
| 2 | 1 | 2 | 2 | 2 | 4 |
| 1 | 2 | 2 | 2 | 2 | 4 |
| 2 | 1 | 1 | 2 | 2 | 4 |

|   |   |   |   |   |   |
|---|---|---|---|---|---|
| 2 | 2 | 2 | 3 | 2 | 4 |
| 2 | 2 | 3 | 3 | 3 | 4 |
| 2 | 1 | 1 | 2 | 2 | 4 |
| 2 | 2 | 1 | 3 | 1 | 4 |
| 2 | 2 | 2 | 3 | 2 | 3 |
| 1 | 1 | 1 | 1 | 1 | 1 |
| 3 | 2 | 2 | 3 | 2 | 4 |
| 2 | 1 | 1 | 2 | 2 | 4 |
| 2 | 3 | 2 | 2 | 2 | 3 |
| 2 | 2 | 3 | 2 | 2 | 3 |
| 2 | 2 | 2 | 2 | 2 | 3 |
| 2 | 1 | 2 | 2 | 2 | 3 |
| 2 | 1 | 1 | 2 | 1 | 2 |
| 1 | 2 | 2 | 2 | 2 | 3 |
| 2 | 2 | 2 | 2 | 2 | 3 |
| 2 | 2 | 2 | 3 | 3 | 3 |
| 3 | 3 | 2 | 2 | 2 | 2 |
| 2 | 2 | 2 | 2 | 2 | 4 |
| 2 | 2 | 2 | 2 | 2 | 3 |
| 2 | 2 | 2 | 2 | 1 | 3 |
| 3 | 2 | 3 | 2 | 2 | 4 |
| 2 | 1 | 1 | 2 | 2 | 4 |

|   |   |   |   |   |   |
|---|---|---|---|---|---|
| 4 | 3 | 3 | 2 | 3 | 4 |
| 4 | 3 | 3 | 3 | 4 | 4 |
| 3 | 2 | 2 | 2 | 3 | 4 |
| 3 | 2 | 2 | 2 | 3 | 4 |
| 3 | 3 | 3 | 2 | 4 | 3 |
| 1 | 1 | 1 | 1 | 2 | 2 |
| 3 | 2 | 3 | 2 | 4 | 4 |
| 2 | 1 | 2 | 2 | 3 | 4 |
| 4 | 3 | 3 | 2 | 4 | 3 |
| 4 | 3 | 3 | 3 | 4 | 4 |
| 4 | 3 | 3 | 3 | 4 | 4 |
| 2 | 2 | 2 | 2 | 3 | 3 |
| 3 | 2 | 2 | 2 | 3 | 4 |
| 4 | 2 | 2 | 2 | 3 | 4 |
| 3 | 3 | 2 | 2 | 3 | 3 |
| 4 | 3 | 3 | 2 | 3 | 3 |
| 4 | 4 | 4 | 4 | 2 | 3 |
| 3 | 3 | 3 | 2 | 3 | 4 |
| 3 | 2 | 2 | 3 | 3 | 4 |
| 3 | 2 | 2 | 2 | 3 | 4 |
| 3 | 3 | 3 | 2 | 4 | 4 |

|   |   |   |   |   |   |
|---|---|---|---|---|---|
| 4 | 1 | 2 | 2 | 3 | 4 |
| 4 | 4 | 3 | 3 | 4 | 4 |
| 4 | 4 | 3 | 4 | 4 | 4 |
| 3 | 3 | 2 | 3 | 4 | 4 |
| 3 | 2 | 2 | 3 | 3 | 4 |
| 4 | 4 | 4 | 4 | 4 | 3 |
| 2 | 2 | 2 | 2 | 2 | 2 |
| 3 | 2 | 3 | 3 | 3 | 3 |
| 3 | 1 | 2 | 3 | 3 | 4 |
| 2 | 3 | 2 | 2 | 3 | 3 |
| 4 | 4 | 3 | 4 | 4 | 4 |
| 4 | 3 | 3 | 4 | 4 | 4 |
| 3 | 3 | 3 | 4 | 4 | 4 |
| 2 | 2 | 2 | 2 | 2 | 2 |
| 3 | 2 | 2 | 3 | 4 | 4 |
| 4 | 4 | 3 | 3 | 4 | 4 |
| 4 | 3 | 3 | 3 | 4 | 4 |
| 2 | 3 | 3 | 2 | 2 | 2 |
| 3 | 3 | 3 | 3 | 4 | 3 |
| 3 | 3 | 2 | 3 | 3 | 4 |
| 3 | 2 | 2 | 2 | 3 | 4 |
| 3 | 3 | 3 | 3 | 3 | 4 |
| 3 | 1 | 1 | 2 | 2 | 3 |

|   |   |   |   |   |   |
|---|---|---|---|---|---|
| 3 | 4 | 3 | 3 | 4 | 4 |
| 4 | 4 | 4 | 4 | 4 | 4 |
| 3 | 3 | 2 | 3 | 3 | 4 |
| 4 | 3 | 2 | 3 | 3 | 4 |
| 4 | 4 | 4 | 4 | 4 | 3 |
| 2 | 2 | 2 | 2 | 2 | 2 |
| 2 | 3 | 3 | 3 | 2 | 3 |
| 3 | 2 | 2 | 3 | 3 | 4 |
| 3 | 4 | 3 | 3 | 3 | 3 |
| 4 | 3 | 3 | 3 | 3 | 4 |
| 3 | 4 | 3 | 3 | 4 | 4 |
| 4 | 4 | 3 | 4 | 4 | 4 |
| 2 | 2 | 1 | 2 | 2 | 3 |
| 3 | 2 | 2 | 3 | 3 | 3 |
| 3 | 4 | 3 | 3 | 3 | 4 |
| 4 | 4 | 4 | 3 | 4 | 4 |
| 2 | 3 | 3 | 2 | 3 | 3 |
| 4 | 4 | 4 | 4 | 4 | 4 |

|   |   |   |   |   |   |
|---|---|---|---|---|---|
| 4 | 4 | 4 | 3 | 4 | 4 |
| 3 | 3 | 2 | 2 | 3 | 3 |
| 3 | 3 | 2 | 2 | 2 | 3 |
| 3 | 1 | 1 | 2 | 2 | 4 |

|   |   |   |   |   |   |
|---|---|---|---|---|---|
| 2 | 2 | 1 | 2 | 2 | 3 |
| 2 | 3 | 2 | 2 | 2 | 4 |
| 1 | 2 | 1 | 1 | 1 | 3 |
| 2 | 1 | 1 | 1 | 1 | 3 |
| 3 | 3 | 2 | 2 | 2 | 3 |
| 3 | 3 | 2 | 3 | 3 | 4 |
| 3 | 1 | 1 | 1 | 1 | 3 |
| 2 | 1 | 1 | 1 | 1 | 3 |
| 2 | 2 | 2 | 2 | 2 | 2 |
| 3 | 3 | 2 | 2 | 2 | 3 |
| 2 | 2 | 2 | 2 | 2 | 3 |
| 2 | 2 | 1 | 2 | 2 | 3 |
| 1 | 1 | 1 | 1 | 1 | 2 |
| 2 | 2 | 2 | 2 | 2 | 3 |
| 1 | 1 | 1 | 1 | 1 | 2 |
| 2 | 2 | 1 | 2 | 2 | 1 |
| 3 | 4 | 3 | 2 | 2 | 1 |
| 2 | 2 | 1 | 1 | 2 | 3 |
| 1 | 2 | 2 | 1 | 1 | 3 |
| 3 | 2 | 1 | 1 | 1 | 3 |
| 2 | 2 | 2 | 2 | 2 | 4 |
| 1 | 1 | 1 | 1 | 1 | 1 |

|   |   |   |   |   |   |
|---|---|---|---|---|---|
| 2 | 2 | 2 | 1 | 1 | 3 |
| 2 | 2 | 2 | 2 | 3 | 3 |
| 1 | 1 | 2 | 2 | 2 | 4 |
| 2 | 1 | 1 | 1 | 2 | 3 |
| 3 | 3 | 3 | 2 | 3 | 4 |
| 3 | 3 | 3 | 2 | 3 | 4 |
| 3 | 1 | 1 | 1 | 2 | 4 |
| 3 | 1 | 1 | 1 | 1 | 3 |
| 2 | 2 | 2 | 1 | 2 | 2 |
| 2 | 2 | 2 | 2 | 2 | 4 |
| 2 | 2 | 2 | 2 | 2 | 3 |
| 2 | 1 | 2 | 1 | 2 | 3 |
| 1 | 1 | 1 | 1 | 1 | 3 |
| 2 | 2 | 2 | 2 | 2 | 3 |
| 2 | 1 | 1 | 1 | 1 | 3 |

|   |   |   |   |   |   |   |
|---|---|---|---|---|---|---|
| 2 | 2 | 2 | 2 | 2 | 2 | 3 |
| 3 | 3 | 2 | 2 | 2 | 2 | 1 |
| 2 | 2 | 2 | 2 | 1 | 2 | 3 |
| 1 | 1 | 1 | 1 | 1 | 2 | 3 |
| 3 | 1 | 1 | 1 | 1 | 2 | 3 |
| 2 | 2 | 2 | 2 | 1 | 1 | 4 |
| 2 | 1 | 1 | 1 | 1 | 1 | 2 |

|   |   |   |   |   |   |   |
|---|---|---|---|---|---|---|
| 1 | 1 | 1 | 1 | 1 | 1 | 2 |
| 2 | 2 | 2 | 2 | 2 | 2 | 2 |
| 1 | 1 | 1 | 1 | 1 | 1 | 1 |
| 1 | 1 | 1 | 1 | 1 | 1 | 2 |
| 2 | 1 | 1 | 1 | 1 | 1 | 2 |
| 2 | 2 | 2 | 2 | 1 | 2 | 2 |
| 2 | 1 | 1 | 1 | 1 | 1 | 1 |
| 1 | 1 | 1 | 1 | 1 | 1 | 1 |
| 2 | 2 | 2 | 2 | 1 | 1 | 2 |
| 2 | 2 | 2 | 2 | 2 | 2 | 2 |
| 2 | 2 | 2 | 2 | 2 | 2 | 2 |
| 1 | 1 | 1 | 1 | 1 | 1 | 2 |
| 1 | 1 | 1 | 1 | 1 | 1 | 1 |
| 2 | 2 | 2 | 2 | 1 | 1 | 2 |
| 2 | 2 | 1 | 1 | 1 | 1 | 2 |
| 2 | 2 | 2 | 2 | 1 | 1 | 2 |
| 4 | 2 | 2 | 2 | 3 | 1 | 1 |
| 1 | 1 | 1 | 1 | 1 | 1 | 1 |
| 1 | 1 | 1 | 1 | 1 | 1 | 3 |
| 1 | 1 | 1 | 1 | 1 | 1 | 1 |
| 2 | 1 | 2 | 1 | 1 | 1 | 4 |
| 1 | 1 | 1 | 1 | 1 | 1 | 2 |

|   |   |   |   |   |   |
|---|---|---|---|---|---|
| 4 | 3 | 3 | 2 | 4 | 4 |
| 4 | 3 | 3 | 4 | 4 | 4 |
| 3 | 2 | 2 | 3 | 4 | 4 |
| 3 | 2 | 2 | 2 | 4 | 4 |
| 3 | 3 | 4 | 3 | 3 | 3 |
| 3 | 3 | 3 | 3 | 4 | 4 |
| 4 | 2 | 4 | 4 | 4 | 4 |
| 4 | 2 | 4 | 3 | 4 | 4 |
| 3 | 3 | 3 | 3 | 3 | 3 |
| 3 | 3 | 3 | 3 | 4 | 4 |
| 3 | 3 | 3 | 3 | 3 | 4 |
| 3 | 2 | 2 | 3 | 3 | 3 |

|   |   |   |   |   |   |
|---|---|---|---|---|---|
| 3 | 1 | 2 | 2 | 3 | 4 |
| 3 | 2 | 2 | 3 | 3 | 4 |
| 3 | 3 | 2 | 2 | 3 | 2 |
| 3 | 3 | 3 | 3 | 3 | 3 |
| 3 | 3 | 3 | 2 | 2 | 2 |
| 3 | 2 | 3 | 3 | 4 | 4 |
| 3 | 3 | 3 | 2 | 4 | 4 |
| 4 | 2 | 2 | 2 | 3 | 4 |
| 2 | 2 | 3 | 3 | 3 | 4 |
| 3 | 1 | 1 | 2 | 2 | 3 |

|   |   |   |   |   |   |
|---|---|---|---|---|---|
| 3 | 3 | 2 | 2 | 3 | 3 |
| 3 | 4 | 3 | 3 | 4 | 4 |
| 3 | 3 | 2 | 2 | 3 | 3 |
| 3 | 3 | 2 | 3 | 3 | 4 |
| 4 | 4 | 4 | 4 | 4 | 3 |
| 3 | 4 | 3 | 3 | 4 | 4 |
| 3 | 3 | 2 | 3 | 3 | 3 |
| 3 | 2 | 2 | 2 | 2 | 3 |
| 3 | 3 | 2 | 3 | 3 | 3 |
| 3 | 3 | 3 | 3 | 4 | 4 |
| 2 | 3 | 3 | 3 | 3 | 3 |
| 3 | 3 | 3 | 2 | 3 | 4 |
| 3 | 2 | 1 | 3 | 3 | 3 |
| 2 | 3 | 2 | 2 | 2 | 3 |
| 3 | 4 | 2 | 2 | 3 | 3 |
| 2 | 3 | 4 | 3 | 2 | 2 |
| 3 | 3 | 2 | 2 | 3 | 3 |
| 3 | 4 | 3 | 3 | 3 | 4 |
| 3 | 3 | 2 | 2 | 2 | 3 |
| 1 | 2 | 1 | 1 | 1 | 3 |
| 2 | 1 | 1 | 1 | 1 | 2 |

|   |   |   |   |   |   |
|---|---|---|---|---|---|
| 2 | 2 | 2 | 2 | 2 | 3 |
| 3 | 3 | 3 | 3 | 3 | 4 |
| 3 | 3 | 3 | 2 | 2 | 4 |
| 3 | 2 | 3 | 2 | 3 | 4 |
| 4 | 3 | 3 | 3 | 3 | 4 |
| 4 | 3 | 3 | 3 | 3 | 4 |
| 4 | 2 | 3 | 3 | 3 | 4 |
| 4 | 1 | 2 | 3 | 3 | 4 |
| 3 | 3 | 3 | 2 | 2 | 3 |

|   |   |   |   |   |   |
|---|---|---|---|---|---|
| 3 | 3 | 3 | 2 | 3 | 4 |
| 3 | 3 | 3 | 3 | 3 | 4 |
| 2 | 2 | 2 | 2 | 2 | 3 |
| 3 | 3 | 2 | 2 | 2 | 3 |
| 1 | 1 | 1 | 1 | 1 | 2 |
| 1 | 2 | 1 | 1 | 1 | 2 |
| 2 | 2 | 2 | 1 | 1 | 2 |
| 1 | 1 | 1 | 1 | 1 | 1 |
| 2 | 2 | 2 | 2 | 3 | 4 |
| 3 | 3 | 2 | 2 | 2 | 4 |
| 3 | 2 | 2 | 2 | 2 | 3 |
| 2 | 3 | 3 | 2 | 2 | 4 |
| 3 | 1 | 1 | 1 | 1 | 3 |

|   |   |   |   |   |   |
|---|---|---|---|---|---|
| 3 | 3 | 2 | 2 | 2 | 4 |
| 4 | 3 | 3 | 3 | 2 | 4 |
| 3 | 2 | 2 | 2 | 2 | 4 |
| 2 | 2 | 1 | 1 | 1 | 3 |
| 4 | 3 | 2 | 2 | 2 | 3 |
| 4 | 3 | 2 | 2 | 2 | 3 |
| 4 | 2 | 2 | 2 | 2 | 4 |
| 4 | 1 | 1 | 2 | 2 | 4 |
| 4 | 4 | 2 | 2 | 2 | 3 |
| 4 | 3 | 3 | 3 | 2 | 4 |
| 2 | 2 | 2 | 2 | 2 | 3 |
| 3 | 2 | 2 | 2 | 2 | 3 |
| 3 | 3 | 1 | 2 | 1 | 3 |
| 1 | 1 | 1 | 1 | 1 | 1 |
| 1 | 1 | 1 | 1 | 1 | 2 |
| 2 | 2 | 1 | 1 | 1 | 1 |
| 1 | 1 | 1 | 1 | 1 | 1 |
| 4 | 2 | 3 | 3 | 3 | 4 |
| 4 | 3 | 1 | 2 | 2 | 4 |
| 3 | 2 | 1 | 1 | 1 | 3 |
| 3 | 3 | 2 | 2 | 3 | 4 |
| 2 | 1 | 1 | 1 | 1 | 2 |

|   |   |   |   |   |   |
|---|---|---|---|---|---|
| 2 | 3 | 2 | 2 | 1 | 3 |
| 3 | 3 | 3 | 2 | 3 | 4 |
| 3 | 4 | 3 | 3 | 3 | 4 |
| 3 | 3 | 3 | 3 | 3 | 4 |
| 4 | 4 | 3 | 3 | 3 | 3 |
| 4 | 4 | 4 | 4 | 4 | 4 |

|   |   |   |   |   |   |
|---|---|---|---|---|---|
| 4 | 4 | 4 | 4 | 4 | 4 |
| 4 | 2 | 3 | 3 | 3 | 4 |
| 4 | 4 | 3 | 2 | 2 | 3 |
| 3 | 3 | 2 | 2 | 2 | 3 |
| 3 | 4 | 3 | 3 | 3 | 4 |
| 3 | 3 | 3 | 2 | 2 | 3 |
| 4 | 4 | 3 | 3 | 3 | 4 |
| 1 | 1 | 1 | 1 | 1 | 2 |
| 1 | 1 | 1 | 1 | 1 | 1 |
| 2 | 2 | 2 | 1 | 1 | 1 |
| 1 | 1 | 2 | 1 | 1 | 1 |
| 2 | 2 | 2 | 2 | 2 | 4 |
| 2 | 3 | 1 | 3 | 2 | 2 |
| 3 | 4 | 3 | 2 | 2 | 3 |
| 2 | 3 | 3 | 3 | 2 | 4 |
| 3 | 2 | 1 | 1 | 1 | 3 |

|   |   |   |   |   |   |
|---|---|---|---|---|---|
| 3 | 4 | 3 | 3 | 3 | 3 |
| 4 | 4 | 3 | 3 | 3 | 4 |
| 3 | 3 | 3 | 3 | 3 | 4 |
| 4 | 3 | 3 | 3 | 3 | 4 |
| 4 | 4 | 3 | 3 | 3 | 3 |
| 4 | 4 | 4 | 4 | 4 | 4 |
| 4 | 3 | 3 | 3 | 4 | 4 |
| 4 | 2 | 3 | 3 | 3 | 4 |
| 4 | 4 | 2 | 2 | 3 | 3 |
| 4 | 3 | 3 | 3 | 3 | 4 |
| 4 | 4 | 4 | 3 | 3 | 4 |
| 3 | 3 | 3 | 3 | 3 | 3 |
| 4 | 4 | 3 | 2 | 3 | 4 |
| 1 | 1 | 1 | 1 | 1 | 1 |
| 1 | 1 | 1 | 1 | 1 | 1 |
| 2 | 2 | 1 | 1 | 1 | 1 |
| 1 | 1 | 2 | 1 | 1 | 1 |
| 3 | 3 | 3 | 3 | 3 | 4 |
| 3 | 3 | 2 | 3 | 3 | 4 |
| 4 | 3 | 2 | 2 | 2 | 4 |
| 2 | 3 | 3 | 2 | 2 | 4 |
| 3 | 1 | 1 | 1 | 1 | 2 |

|   |   |   |   |   |   |
|---|---|---|---|---|---|
| 2 | 4 | 1 | 2 | 2 | 3 |
| 2 | 3 | 2 | 3 | 3 | 4 |
| 1 | 3 | 1 | 1 | 2 | 3 |

|   |   |   |   |   |   |
|---|---|---|---|---|---|
| 1 | 2 | 1 | 2 | 2 | 3 |
| 3 | 4 | 2 | 2 | 3 | 3 |
| 3 | 4 | 2 | 3 | 3 | 4 |
| 2 | 2 | 1 | 2 | 2 | 3 |
| 4 | 4 | 2 | 3 | 3 | 4 |
| 2 | 3 | 2 | 2 | 2 | 3 |
| 2 | 3 | 2 | 2 | 2 | 3 |
| 2 | 2 | 1 | 2 | 2 | 3 |
| 2 | 4 | 1 | 2 | 3 | 4 |
| 1 | 1 | 1 | 1 | 1 | 1 |
| 1 | 1 | 1 | 1 | 1 | 1 |
| 1 | 2 | 1 | 1 | 1 | 1 |
| 1 | 1 | 1 | 1 | 1 | 1 |
| 2 | 3 | 2 | 2 | 2 | 3 |
| 1 | 4 | 1 | 2 | 2 | 3 |
| 3 | 4 | 1 | 2 | 2 | 4 |
| 1 | 3 | 1 | 1 | 2 | 4 |
| 2 | 1 | 1 | 1 | 2 | 4 |

|   |   |   |   |   |   |
|---|---|---|---|---|---|
| 1 | 1 | 1 | 1 | 1 | 2 |
| 2 | 2 | 2 | 2 | 2 | 3 |
| 1 | 1 | 1 | 1 | 1 | 2 |
| 1 | 1 | 1 | 1 | 1 | 3 |
| 2 | 2 | 1 | 1 | 2 | 2 |
| 2 | 3 | 2 | 2 | 2 | 3 |
| 2 | 1 | 1 | 1 | 1 | 2 |
| 1 | 1 | 1 | 1 | 1 | 2 |
| 1 | 2 | 1 | 1 | 1 | 2 |
| 2 | 2 | 2 | 2 | 2 | 2 |
| 2 | 2 | 2 | 2 | 2 | 2 |
| 1 | 1 | 1 | 1 | 1 | 3 |
| 1 | 1 | 1 | 1 | 1 | 2 |
| 1 | 1 | 1 | 1 | 1 | 1 |
| 1 | 1 | 1 | 1 | 1 | 1 |
| 1 | 1 | 1 | 1 | 1 | 1 |
| 1 | 1 | 1 | 1 | 1 | 1 |
| 1 | 1 | 1 | 1 | 1 | 1 |
| 1 | 1 | 1 | 1 | 1 | 2 |
| 1 | 1 | 1 | 1 | 1 | 1 |
| 1 | 2 | 1 | 1 | 1 | 4 |
| 1 | 1 | 1 | 1 | 1 | 2 |

|   |   |   |   |   |   |
|---|---|---|---|---|---|
| 3 | 3 | 2 | 3 | 2 | 3 |
| 3 | 4 | 2 | 3 | 3 | 4 |
| 3 | 3 | 3 | 3 | 3 | 4 |
| 4 | 4 | 4 | 4 | 3 | 4 |
| 4 | 4 | 4 | 4 | 3 | 4 |
| 3 | 3 | 3 | 4 | 3 | 3 |
| 3 | 2 | 2 | 3 | 3 | 3 |
| 3 | 4 | 3 | 3 | 2 | 3 |
| 3 | 3 | 3 | 2 | 3 | 3 |
| 2 | 3 | 2 | 3 | 3 | 4 |
| 3 | 3 | 3 | 4 | 4 | 4 |
| 4 | 3 | 3 | 1 | 1 | 1 |
| 1 | 1 | 1 | 1 | 1 | 1 |
| 1 | 1 | 1 | 1 | 1 | 1 |
| 1 | 1 | 1 | 1 | 1 | 1 |
| 1 | 1 | 1 | 1 | 1 | 1 |
| 2 | 3 | 2 | 1 | 2 | 3 |
| 2 | 3 | 2 | 2 | 2 | 3 |
| 3 | 2 | 1 | 2 | 2 | 2 |
| 2 | 2 | 2 | 2 | 2 | 3 |
| 3 | 1 | 1 | 2 | 2 | 2 |

|   |   |   |   |   |   |
|---|---|---|---|---|---|
| 4 | 4 | 4 | 4 | 4 | 4 |
| 4 | 4 | 4 | 4 | 4 | 4 |
| 3 | 4 | 3 | 3 | 4 | 4 |
| 4 | 3 | 3 | 4 | 4 | 4 |
| 4 | 4 | 4 | 4 | 4 | 3 |
| 4 | 4 | 4 | 4 | 4 | 4 |
| 4 | 4 | 4 | 4 | 4 | 4 |
| 4 | 3 | 4 | 4 | 4 | 3 |
| 3 | 2 | 3 | 4 | 4 | 4 |
| 4 | 4 | 4 | 4 | 4 | 3 |
| 4 | 3 | 4 | 4 | 4 | 4 |
| 4 | 3 | 4 | 4 | 4 | 4 |
| 4 | 3 | 4 | 4 | 4 | 4 |
| 3 | 3 | 3 | 4 | 3 | 4 |
| 4 | 3 | 3 | 3 | 4 | 4 |
| 4 | 3 | 4 | 4 | 4 | 4 |
| 1 | 1 | 1 | 1 | 1 | 1 |
| 2 | 2 | 2 | 2 | 2 | 2 |
| 2 | 2 | 2 | 2 | 2 | 1 |
| 4 | 4 | 4 | 4 | 4 | 4 |
| 3 | 3 | 3 | 3 | 3 | 3 |
| 4 | 3 | 3 | 3 | 3 | 4 |
| 4 | 4 | 4 | 4 | 4 | 4 |
| 4 | 1 | 1 | 2 | 2 | 4 |

|   |   |   |   |   |   |
|---|---|---|---|---|---|
| 4 | 4 | 4 | 3 | 4 | 4 |
| 4 | 4 | 4 | 4 | 4 | 4 |
| 4 | 3 | 3 | 4 | 4 | 4 |
| 3 | 2 | 3 | 3 | 4 | 4 |
| 4 | 4 | 4 | 4 | 4 | 3 |
| 4 | 4 | 4 | 4 | 4 | 4 |
| 3 | 3 | 4 | 3 | 3 | 3 |
| 3 | 2 | 4 | 4 | 4 | 4 |
| 4 | 4 | 3 | 3 | 3 | 3 |
| 4 | 4 | 4 | 4 | 4 | 4 |
| 4 | 3 | 3 | 4 | 3 | 4 |
| 4 | 3 | 4 | 2 | 3 | 3 |
| 3 | 2 | 3 | 1 | 1 | 1 |
| 1 | 1 | 1 | 1 | 1 | 1 |
| 2 | 2 | 2 | 1 | 2 | 1 |
| 1 | 1 | 1 | 4 | 4 | 4 |
| 4 | 4 | 4 | 4 | 4 | 3 |
| 4 | 4 | 4 | 3 | 3 | 4 |
| 3 | 3 | 3 | 4 | 3 | 4 |
| 3 | 1 | 2 | 2 | 2 | 4 |

|   |   |   |   |   |   |
|---|---|---|---|---|---|
| 4 | 3 | 4 | 3 | 4 | 4 |
| 4 | 4 | 4 | 4 | 4 | 4 |
| 3 | 2 | 4 | 3 | 4 | 4 |
| 4 | 2 | 3 | 3 | 4 | 4 |
| 4 | 4 | 4 | 4 | 3 | 3 |
| 4 | 3 | 4 | 4 | 4 | 4 |
| 3 | 2 | 4 | 4 | 3 | 3 |
| 3 | 2 | 3 | 4 | 4 | 4 |
| 3 | 3 | 3 | 3 | 4 | 3 |
| 4 | 4 | 4 | 4 | 4 | 4 |
| 3 | 3 | 2 | 3 | 3 | 3 |
| 3 | 3 | 3 | 3 | 4 | 4 |
| 3 | 2 | 2 | 2 | 3 | 3 |
| 4 | 2 | 3 | 3 | 4 | 4 |
| 4 | 4 | 4 | 4 | 4 | 4 |
| 1 | 1 | 1 | 1 | 1 | 1 |
| 2 | 2 | 2 | 2 | 2 | 1 |
| 4 | 3 | 3 | 4 | 4 | 4 |
| 3 | 4 | 3 | 3 | 4 | 4 |
| 4 | 3 | 3 | 3 | 3 | 4 |

|   |   |   |   |   |   |
|---|---|---|---|---|---|
| 4 | 4 | 4 | 3 | 3 | 4 |
| 4 | 2 | 3 | 3 | 4 | 4 |
| 3 | 3 | 2 | 2 | 3 | 3 |
| 3 | 4 | 3 | 3 | 4 | 4 |
| 4 | 3 | 2 | 3 | 4 | 4 |
| 4 | 3 | 3 | 3 | 4 | 4 |
| 4 | 4 | 4 | 3 | 4 | 3 |
| 4 | 4 | 3 | 3 | 4 | 4 |
| 4 | 3 | 3 | 3 | 3 | 3 |
| 3 | 2 | 2 | 3 | 3 | 4 |
| 4 | 4 | 4 | 3 | 4 | 3 |
| 3 | 3 | 3 | 3 | 4 | 4 |
| 3 | 4 | 3 | 3 | 4 | 4 |
| 3 | 3 | 3 | 3 | 3 | 4 |
| 4 | 3 | 3 | 2 | 3 | 4 |
| 3 | 3 | 2 | 2 | 3 | 4 |
| 1 | 1 | 1 | 1 | 1 | 1 |
| 2 | 2 | 2 | 1 | 2 | 2 |
| 1 | 2 | 2 | 1 | 1 | 1 |
| 3 | 3 | 3 | 2 | 3 | 3 |
| 4 | 3 | 2 | 2 | 3 | 4 |
| 4 | 3 | 2 | 2 | 3 | 3 |
| 2 | 3 | 2 | 1 | 2 | 3 |
| 4 | 2 | 2 | 2 | 3 | 4 |

|   |   |   |   |   |   |
|---|---|---|---|---|---|
| 3 | 1 | 2 | 1 | 2 | 2 |
| 3 | 3 | 3 | 3 | 3 | 3 |
| 2 | 1 | 2 | 2 | 2 | 3 |
| 2 | 2 | 2 | 2 | 2 | 3 |
| 3 | 2 | 3 | 3 | 3 | 4 |
| 3 | 3 | 3 | 3 | 3 | 4 |
| 3 | 1 | 2 | 2 | 2 | 3 |
| 2 | 1 | 2 | 1 | 2 | 3 |
| 2 | 2 | 2 | 2 | 2 | 2 |
| 3 | 3 | 3 | 3 | 3 | 3 |
| 2 | 3 | 3 | 2 | 3 | 3 |
| 2 | 2 | 2 | 3 | 2 | 3 |
| 1 | 1 | 2 | 1 | 2 | 2 |
| 2 | 2 | 2 | 2 | 2 | 2 |
| 2 | 1 | 1 | 1 | 1 | 2 |
| 1 | 1 | 1 | 1 | 1 | 1 |
| 1 | 1 | 1 | 1 | 1 | 1 |

|   |   |   |   |   |   |   |
|---|---|---|---|---|---|---|
| 3 | 3 | 3 | 3 | 3 | 3 | 3 |
| 3 | 3 | 2 | 1 | 2 | 2 | 2 |
| 3 | 1 | 2 | 2 | 2 | 2 | 3 |
| 3 | 3 | 3 | 3 | 2 | 3 | 4 |
| 3 | 1 | 1 | 1 | 1 | 1 | 2 |

|   |   |   |   |   |   |   |
|---|---|---|---|---|---|---|
| 2 | 2 | 1 | 3 | 3 | 3 | 3 |
| 2 | 2 | 2 | 3 | 3 | 3 | 4 |
| 1 | 1 | 2 | 3 | 3 | 2 | 4 |
| 1 | 1 | 1 | 2 | 2 | 2 | 4 |
| 2 | 2 | 2 | 3 | 3 | 3 | 3 |
| 2 | 2 | 3 | 2 | 2 | 2 | 4 |
| 2 | 1 | 2 | 3 | 3 | 3 | 4 |
| 2 | 2 | 1 | 2 | 2 | 2 | 4 |
| 2 | 2 | 2 | 3 | 4 | 3 | 4 |
| 2 | 2 | 3 | 2 | 2 | 2 | 3 |
| 1 | 1 | 1 | 2 | 2 | 2 | 3 |
| 2 | 1 | 1 | 1 | 2 | 2 | 3 |
| 2 | 2 | 2 | 2 | 3 | 2 | 4 |
| 1 | 1 | 1 | 1 | 1 | 1 | 2 |
| 1 | 1 | 1 | 1 | 2 | 1 | 2 |
| 2 | 1 | 1 | 1 | 1 | 1 | 1 |
| 1 | 1 | 2 | 2 | 2 | 3 | 3 |
| 1 | 1 | 2 | 2 | 2 | 2 | 3 |
| 2 | 1 | 1 | 2 | 2 | 2 | 4 |
| 2 | 1 | 2 | 2 | 2 | 2 | 4 |
| 2 | 1 | 1 | 3 | 3 | 3 | 4 |

|   |   |   |   |   |   |   |
|---|---|---|---|---|---|---|
| 4 | 4 | 3 | 3 | 3 | 3 | 4 |
| 4 | 3 | 3 | 4 | 4 | 4 | 4 |
| 3 | 2 | 3 | 3 | 3 | 3 | 4 |
| 3 | 2 | 3 | 4 | 4 | 4 | 4 |
| 3 | 3 | 4 | 4 | 4 | 4 | 3 |
| 3 | 3 | 4 | 4 | 4 | 4 | 4 |
| 3 | 2 | 3 | 3 | 3 | 3 | 3 |
| 3 | 1 | 3 | 3 | 3 | 3 | 4 |
| 3 | 3 | 3 | 3 | 3 | 3 | 3 |
| 3 | 3 | 3 | 3 | 3 | 3 | 4 |
| 3 | 3 | 3 | 3 | 3 | 3 | 4 |
| 3 | 3 | 3 | 3 | 3 | 3 | 3 |
| 3 | 2 | 3 | 3 | 3 | 3 | 3 |
| 3 | 2 | 2 | 2 | 2 | 3 | 3 |
| 4 | 3 | 3 | 3 | 3 | 3 | 4 |

|   |   |   |   |   |   |   |
|---|---|---|---|---|---|---|
| 1 | 1 | 1 | 1 | 1 | 1 | 1 |
| 2 | 2 | 2 | 2 | 1 | 2 | 1 |
| 2 | 2 | 1 | 1 | 1 | 1 | 1 |
| 3 | 3 | 3 | 3 | 3 | 3 | 4 |
| 3 | 3 | 3 | 3 | 3 | 2 | 3 |
| 4 | 2 | 3 | 3 | 3 | 3 | 4 |
| 2 | 2 | 2 | 2 | 2 | 3 | 3 |
| 4 | 1 | 1 | 1 | 2 | 2 | 4 |

|   |   |   |   |   |   |   |
|---|---|---|---|---|---|---|
| 2 | 2 | 2 | 2 | 2 | 1 | 3 |
| 2 | 2 | 2 | 3 | 3 | 2 | 3 |
| 1 | 2 | 2 | 2 | 2 | 1 | 4 |
| 1 | 1 | 1 | 2 | 2 | 1 | 4 |
| 2 | 2 | 2 | 3 | 2 | 1 | 3 |
| 3 | 3 | 3 | 3 | 2 | 2 | 4 |
| 2 | 1 | 3 | 3 | 2 | 1 | 4 |
| 2 | 1 | 2 | 2 | 1 | 1 | 3 |
| 2 | 2 | 2 | 2 | 2 | 1 | 2 |
| 2 | 2 | 2 | 2 | 2 | 2 | 3 |
| 2 | 2 | 2 | 2 | 2 | 2 | 3 |
| 1 | 2 | 2 | 2 | 2 | 1 | 3 |
| 2 | 1 | 2 | 2 | 2 | 1 | 4 |
| 2 | 2 | 2 | 2 | 2 | 2 | 3 |
| 2 | 2 | 2 | 2 | 2 | 2 | 3 |
| 1 | 2 | 2 | 2 | 2 | 1 | 1 |
| 1 | 1 | 1 | 1 | 1 | 1 | 1 |
| 1 | 1 | 1 | 1 | 1 | 1 | 3 |
| 1 | 1 | 1 | 1 | 1 | 1 | 3 |
| 2 | 2 | 2 | 2 | 1 | 1 | 3 |
| 1 | 2 | 2 | 2 | 2 | 1 | 3 |
| 2 | 1 | 1 | 1 | 1 | 1 | 3 |

|   |   |   |   |   |   |   |
|---|---|---|---|---|---|---|
| 3 | 3 | 3 | 3 | 3 | 3 | 4 |
| 3 | 3 | 3 | 3 | 4 | 4 | 4 |
| 1 | 2 | 2 | 2 | 2 | 2 | 4 |
| 2 | 1 | 2 | 2 | 2 | 2 | 3 |
| 3 | 2 | 3 | 3 | 3 | 3 | 3 |
| 2 | 2 | 3 | 3 | 3 | 3 | 3 |
| 2 | 1 | 2 | 2 | 2 | 2 | 3 |
| 1 | 1 | 1 | 1 | 2 | 2 | 3 |
| 3 | 3 | 2 | 2 | 3 | 3 | 3 |
| 3 | 2 | 2 | 2 | 3 | 3 | 3 |
| 2 | 2 | 2 | 2 | 2 | 2 | 3 |

|   |   |   |   |   |   |
|---|---|---|---|---|---|
| 3 | 2 | 2 | 3 | 3 | 4 |
| 2 | 1 | 1 | 3 | 2 | 4 |
| 2 | 2 | 2 | 2 | 2 | 3 |
| 2 | 2 | 2 | 2 | 3 | 3 |
| 1 | 1 | 1 | 1 | 1 | 1 |
| 1 | 2 | 1 | 1 | 1 | 1 |
| 3 | 3 | 2 | 3 | 2 | 4 |
| 3 | 2 | 2 | 3 | 3 | 4 |
| 3 | 2 | 2 | 2 | 2 | 4 |
| 2 | 2 | 1 | 2 | 2 | 3 |
| 2 | 1 | 1 | 1 | 1 | 3 |

|   |   |   |   |   |   |
|---|---|---|---|---|---|
| 3 | 3 | 2 | 2 | 2 | 3 |
| 3 | 3 | 3 | 3 | 3 | 3 |
| 3 | 3 | 2 | 2 | 3 | 3 |
| 4 | 3 | 3 | 3 | 3 | 4 |
| 4 | 4 | 4 | 3 | 4 | 3 |
| 4 | 4 | 4 | 3 | 3 | 3 |
| 3 | 3 | 3 | 3 | 3 | 2 |
| 2 | 2 | 2 | 3 | 3 | 3 |
| 3 | 3 | 2 | 3 | 2 | 3 |
| 2 | 3 | 2 | 3 | 2 | 4 |
| 2 | 2 | 2 | 2 | 2 | 3 |
| 2 | 2 | 2 | 2 | 2 | 3 |
| 2 | 2 | 2 | 2 | 2 | 4 |
| 3 | 3 | 2 | 3 | 3 | 3 |
| 3 | 2 | 2 | 2 | 2 | 4 |
| 4 | 4 | 4 | 4 | 4 | 4 |
| 1 | 1 | 1 | 1 | 1 | 1 |
| 1 | 1 | 1 | 1 | 1 | 1 |
| 3 | 2 | 1 | 2 | 2 | 2 |
| 3 | 3 | 2 | 2 | 2 | 4 |
| 3 | 2 | 2 | 2 | 2 | 3 |
| 2 | 2 | 1 | 1 | 1 | 3 |
| 4 | 2 | 2 | 2 | 2 | 3 |

|   |   |   |   |   |   |
|---|---|---|---|---|---|
| 3 | 3 | 1 | 3 | 2 | 4 |
| 3 | 3 | 2 | 4 | 3 | 4 |
| 2 | 2 | 1 | 3 | 2 | 4 |
| 3 | 2 | 2 | 3 | 3 | 4 |
| 2 | 2 | 2 | 3 | 3 | 3 |
| 2 | 2 | 2 | 3 | 3 | 4 |
| 2 | 1 | 2 | 3 | 2 | 3 |
| 2 | 1 | 2 | 3 | 3 | 4 |

|   |   |   |   |   |   |
|---|---|---|---|---|---|
| 2 | 3 | 2 | 3 | 3 | 3 |
| 2 | 2 | 2 | 3 | 2 | 3 |
| 2 | 2 | 2 | 3 | 3 | 4 |
| 2 | 2 | 2 | 3 | 3 | 4 |
| 3 | 2 | 1 | 3 | 3 | 4 |
| 2 | 2 | 2 | 4 | 3 | 4 |
| 3 | 3 | 2 | 3 | 3 | 4 |
| 2 | 3 | 2 | 3 | 3 | 3 |
| 1 | 1 | 1 | 1 | 1 | 1 |
| 2 | 2 | 2 | 3 | 2 | 3 |
| 2 | 1 | 1 | 3 | 2 | 4 |
| 3 | 2 | 2 | 3 | 3 | 4 |
| 1 | 1 | 1 | 2 | 2 | 3 |
| 2 | 1 | 1 | 2 | 2 | 4 |

|   |   |   |   |   |   |
|---|---|---|---|---|---|
| 2 | 2 | 2 | 2 | 3 | 4 |
| 3 | 3 | 3 | 3 | 4 | 4 |
| 2 | 2 | 2 | 3 | 4 | 4 |
| 3 | 2 | 2 | 3 | 4 | 4 |
| 3 | 3 | 3 | 3 | 4 | 3 |
| 3 | 3 | 3 | 3 | 4 | 4 |
| 2 | 2 | 2 | 3 | 4 | 4 |
| 2 | 1 | 2 | 3 | 4 | 4 |
| 2 | 2 | 2 | 2 | 3 | 3 |
| 3 | 2 | 3 | 3 | 3 | 4 |
| 3 | 3 | 3 | 3 | 4 | 4 |
| 2 | 2 | 2 | 2 | 3 | 4 |
| 3 | 2 | 1 | 2 | 3 | 4 |
| 3 | 2 | 2 | 3 | 4 | 4 |
| 2 | 2 | 2 | 2 | 3 | 4 |
| 2 | 2 | 2 | 2 | 3 | 4 |
| 1 | 1 | 1 | 1 | 1 | 1 |
| 2 | 2 | 1 | 3 | 3 | 3 |
| 2 | 2 | 1 | 2 | 2 | 3 |
| 3 | 2 | 2 | 2 | 2 | 4 |
| 2 | 2 | 1 | 3 | 3 | 4 |
| 2 | 1 | 1 | 1 | 2 | 4 |

|   |   |   |   |   |   |
|---|---|---|---|---|---|
| 1 | 2 | 2 | 1 | 1 | 2 |
| 2 | 3 | 3 | 2 | 2 | 3 |
| 1 | 2 | 2 | 1 | 1 | 3 |
| 1 | 2 | 2 | 1 | 1 | 3 |
| 2 | 3 | 3 | 2 | 2 | 3 |

|   |   |   |   |   |   |
|---|---|---|---|---|---|
| 2 | 3 | 3 | 2 | 2 | 3 |
| 3 | 2 | 2 | 2 | 2 | 1 |
| 2 | 1 | 2 | 1 | 1 | 1 |
| 2 | 3 | 2 | 2 | 2 | 2 |
| 2 | 2 | 2 | 2 | 2 | 2 |
| 2 | 3 | 2 | 2 | 2 | 2 |
| 1 | 2 | 2 | 2 | 2 | 2 |
| 1 | 2 | 2 | 1 | 1 | 1 |
| 2 | 2 | 2 | 2 | 2 | 2 |
| 2 | 2 | 2 | 1 | 1 | 1 |
| 2 | 3 | 2 | 2 | 2 | 2 |
| 2 | 2 | 2 | 2 | 1 | 1 |
| 1 | 2 | 1 | 1 | 1 | 2 |
| 1 | 2 | 1 | 1 | 1 | 1 |
| 2 | 2 | 1 | 1 | 1 | 2 |
| 1 | 2 | 2 | 1 | 2 | 3 |
| 2 | 1 | 1 | 1 | 1 | 2 |

|   |   |   |   |   |   |
|---|---|---|---|---|---|
| 2 | 2 | 1 | 1 | 1 | 2 |
| 2 | 3 | 3 | 2 | 2 | 3 |
| 1 | 2 | 2 | 2 | 2 | 3 |
| 2 | 2 | 2 | 1 | 2 | 3 |
| 3 | 3 | 3 | 2 | 2 | 3 |
| 2 | 3 | 3 | 2 | 2 | 3 |
| 3 | 2 | 2 | 2 | 2 | 3 |
| 2 | 1 | 2 | 2 | 2 | 3 |
| 2 | 3 | 2 | 2 | 2 | 3 |
| 2 | 2 | 2 | 2 | 2 | 3 |
| 2 | 2 | 2 | 2 | 2 | 3 |
| 1 | 2 | 2 | 1 | 2 | 3 |
| 3 | 3 | 3 | 2 | 2 | 4 |
| 2 | 2 | 2 | 2 | 2 | 3 |
| 2 | 3 | 2 | 2 | 2 | 3 |
| 3 | 3 | 3 | 2 | 3 | 3 |
| 3 | 2 | 3 | 3 | 2 | 2 |
| 1 | 2 | 2 | 1 | 2 | 2 |
| 1 | 2 | 1 | 1 | 1 | 1 |
| 2 | 2 | 1 | 1 | 1 | 2 |
| 1 | 2 | 2 | 1 | 2 | 3 |
| 3 | 2 | 1 | 1 | 2 | 4 |

|   |   |   |   |   |   |
|---|---|---|---|---|---|
| 4 | 3 | 4 | 4 | 4 | 4 |
| 4 | 4 | 4 | 4 | 4 | 4 |

|   |   |   |   |   |   |
|---|---|---|---|---|---|
| 4 | 3 | 3 | 4 | 4 | 4 |
| 4 | 3 | 3 | 4 | 4 | 4 |
| 3 | 3 | 4 | 4 | 4 | 3 |
| 4 | 3 | 4 | 4 | 3 | 4 |
| 4 | 3 | 4 | 4 | 4 | 4 |
| 3 | 2 | 3 | 3 | 4 | 4 |
| 4 | 4 | 4 | 4 | 4 | 4 |
| 3 | 3 | 3 | 3 | 3 | 4 |
| 4 | 4 | 4 | 4 | 4 | 4 |
| 3 | 3 | 4 | 3 | 3 | 4 |
| 3 | 2 | 3 | 3 | 3 | 4 |
| 4 | 2 | 3 | 3 | 3 | 4 |
| 4 | 4 | 3 | 3 | 3 | 4 |
| 3 | 3 | 4 | 3 | 3 | 3 |
| 4 | 4 | 4 | 4 | 3 | 3 |
| 4 | 3 | 3 | 3 | 4 | 4 |
| 3 | 2 | 2 | 3 | 4 | 4 |
| 4 | 2 | 3 | 3 | 3 | 4 |
| 3 | 3 | 4 | 3 | 3 | 4 |
| 3 | 1 | 1 | 2 | 2 | 3 |

|   |   |   |   |   |   |
|---|---|---|---|---|---|
| 3 | 4 | 3 | 3 | 4 | 4 |
| 3 | 4 | 4 | 3 | 4 | 4 |
| 2 | 3 | 3 | 3 | 4 | 4 |
| 3 | 3 | 3 | 4 | 4 | 4 |
| 4 | 4 | 4 | 4 | 4 | 4 |
| 3 | 4 | 4 | 4 | 4 | 4 |
| 4 | 4 | 4 | 4 | 4 | 4 |
| 3 | 2 | 3 | 3 | 4 | 4 |
| 4 | 4 | 4 | 4 | 4 | 4 |
| 3 | 3 | 3 | 3 | 4 | 4 |
| 3 | 3 | 3 | 3 | 4 | 4 |
| 2 | 3 | 3 | 3 | 3 | 3 |
| 3 | 3 | 3 | 2 | 3 | 3 |
| 3 | 3 | 3 | 3 | 4 | 4 |
| 2 | 3 | 3 | 3 | 3 | 3 |
| 4 | 4 | 4 | 4 | 4 | 4 |
| 4 | 4 | 4 | 4 | 4 | 4 |
| 4 | 4 | 4 | 4 | 4 | 4 |
| 4 | 3 | 3 | 4 | 4 | 3 |
| 3 | 3 | 3 | 3 | 4 | 4 |
| 4 | 3 | 3 | 3 | 4 | 4 |
| 3 | 3 | 3 | 3 | 3 | 4 |
| 2 | 1 | 1 | 1 | 2 | 3 |

3  
3  
3  
4  
4  
4  
4  
4  
4  
3  
4  
3  
3  
3  
4  
3  
3  
4  
3  
3  
3  
4  
3  
3  
4  
4  
3  
3  
4  
4  
2  
4

3  
4  
3  
4  
4  
4  
4  
4  
2  
4  
3  
3  
4  
3  
4  
4  
2  
4  
4  
4  
3  
2  
2  
2  
2

2  
3  
3  
4  
3  
3  
2  
3  
3  
2  
2  
3  
4  
3  
2  
2  
1  
2

3  
3  
3  
4  
3  
4  
3  
3  
4  
3  
3  
2  
3  
3  
2  
2  
3

3  
4  
4  
4  
4  
3  
3  
4  
3  
2  
2  
3  
3  
2  
2  
3

3  
3  
4  
4  
4  
4  
3  
4  
3  
4  
3  
4  
3  
3  
3  
3  
3  
4

4  
4  
4  
4  
3  
4  
3  
2  
4  
4  
4  
4  
3  
3  
4  
4  
4  
4  
4  
4  
4  
4  
4  
4  
2  
4

4  
4  
3  
3  
4  
3  
2  
4  
3  
4  
3  
2  
4  
3  
4  
4  
4  
4  
3  
3  
3  
2

4  
4  
3  
3  
4  
4  
3  
4  
4  
4  
3  
2  
4  
3  
4  
4  
3  
2  
3

3  
4  
3  
3  
4  
3  
3  
3  
4  
3  
4  
2  
4  
3  
4  
4  
3  
2  
3

4  
4  
4  
4  
4  
3  
4  
4  
4  
3  
4  
4  
3  
4  
4  
3  
4  
3  
4

4  
4  
4  
4  
3  
4  
4  
4  
4  
4  
4  
3  
4  
4  
4  
3  
4  
4  
4

|   |   |   |   |   |   |
|---|---|---|---|---|---|
| 4 | 3 | 3 | 3 | 4 | 4 |
| 4 | 4 | 4 | 4 | 4 | 4 |
| 4 | 3 | 3 | 4 | 3 | 4 |
| 4 | 3 | 3 | 3 | 4 | 4 |
| 4 | 4 | 4 | 4 | 4 | 3 |
| 4 | 4 | 4 | 4 | 4 | 4 |
| 3 | 3 | 3 | 4 | 3 | 3 |
| 3 | 2 | 3 | 4 | 4 | 4 |
| 3 | 3 | 3 | 4 | 3 | 3 |
| 4 | 4 | 3 | 4 | 4 | 4 |
| 4 | 4 | 4 | 4 | 4 | 4 |
| 4 | 4 | 4 | 4 | 4 | 4 |
| 4 | 4 | 4 | 4 | 4 | 4 |
| 3 | 3 | 2 | 3 | 3 | 3 |
| 4 | 3 | 3 | 4 | 4 | 4 |
| 2 | 3 | 3 | 3 | 3 | 3 |
| 4 | 4 | 3 | 4 | 4 | 3 |
| 3 | 3 | 4 | 3 | 3 | 4 |
| 3 | 4 | 3 | 3 | 4 | 3 |
| 4 | 3 | 3 | 3 | 3 | 4 |
| 2 | 3 | 2 | 3 | 3 | 4 |
| 3 | 2 | 1 | 2 | 2 | 3 |

|   |   |   |   |   |   |
|---|---|---|---|---|---|
| 4 | 4 | 2 | 3 | 3 | 4 |
| 4 | 4 | 3 | 3 | 3 | 4 |
| 4 | 4 | 2 | 3 | 3 | 4 |
| 4 | 3 | 3 | 3 | 4 | 4 |
| 4 | 4 | 4 | 3 | 4 | 3 |
| 4 | 4 | 3 | 4 | 4 | 4 |
| 4 | 4 | 3 | 4 | 4 | 4 |
| 4 | 4 | 3 | 4 | 4 | 4 |
| 4 | 3 | 3 | 3 | 4 | 4 |
| 3 | 3 | 2 | 3 | 3 | 3 |
| 3 | 3 | 3 | 3 | 3 | 4 |
| 3 | 3 | 3 | 3 | 3 | 4 |
| 4 | 4 | 2 | 3 | 3 | 4 |
| 4 | 3 | 3 | 3 | 4 | 4 |
| 2 | 3 | 2 | 2 | 3 | 3 |
| 3 | 4 | 3 | 3 | 3 | 3 |
| 3 | 4 | 4 | 2 | 2 | 3 |
| 3 | 3 | 2 | 2 | 3 | 3 |
| 4 | 3 | 2 | 2 | 4 | 4 |

|   |   |   |   |   |   |
|---|---|---|---|---|---|
| 4 | 4 | 2 | 3 | 3 | 4 |
| 2 | 3 | 2 | 2 | 3 | 3 |
| 4 | 2 | 1 | 2 | 2 | 3 |

|   |   |   |   |   |   |
|---|---|---|---|---|---|
| 3 | 3 | 2 | 2 | 2 | 3 |
| 3 | 3 | 2 | 3 | 3 | 3 |
| 3 | 3 | 2 | 3 | 3 | 3 |
| 3 | 3 | 2 | 3 | 3 | 3 |
| 4 | 4 | 4 | 4 | 4 | 3 |
| 4 | 4 | 4 | 4 | 4 | 4 |
| 4 | 4 | 3 | 4 | 4 | 4 |
| 4 | 4 | 2 | 3 | 4 | 4 |
| 3 | 2 | 2 | 3 | 4 | 4 |
| 4 | 4 | 3 | 3 | 3 | 3 |
| 3 | 3 | 2 | 2 | 3 | 3 |
| 2 | 3 | 2 | 3 | 3 | 4 |
| 3 | 3 | 3 | 3 | 4 | 4 |
| 4 | 3 | 2 | 4 | 3 | 4 |
| 4 | 3 | 1 | 2 | 2 | 2 |
| 2 | 2 | 3 | 3 | 3 | 3 |
| 4 | 4 | 4 | 2 | 3 | 3 |
| 3 | 4 | 4 | 1 | 2 | 3 |
| 2 | 2 | 1 | 2 | 3 | 3 |
| 2 | 2 | 2 | 2 | 3 | 3 |
| 4 | 3 | 2 | 3 | 2 | 4 |
| 1 | 2 | 2 | 2 | 2 | 3 |
| 4 | 1 | 1 | 2 | 2 | 3 |

|   |   |   |   |   |   |
|---|---|---|---|---|---|
| 2 | 2 | 1 | 2 | 1 | 3 |
| 3 | 3 | 3 | 2 | 2 | 4 |
| 2 | 2 | 1 | 2 | 1 | 4 |
| 2 | 2 | 2 | 2 | 1 | 3 |
| 3 | 2 | 2 | 3 | 2 | 3 |
| 2 | 2 | 2 | 2 | 2 | 3 |
| 3 | 2 | 2 | 2 | 1 | 3 |
| 3 | 1 | 1 | 2 | 1 | 3 |
| 1 | 1 | 1 | 1 | 1 | 1 |
| 1 | 1 | 1 | 1 | 1 | 1 |
| 1 | 1 | 1 | 1 | 1 | 1 |
| 2 | 2 | 2 | 2 | 2 | 3 |
| 2 | 1 | 1 | 2 | 1 | 3 |
| 3 | 2 | 2 | 2 | 2 | 3 |
| 2 | 2 | 2 | 2 | 1 | 3 |
| 3 | 3 | 3 | 3 | 2 | 3 |

|   |   |   |   |   |   |   |
|---|---|---|---|---|---|---|
| 2 | 3 | 3 | 3 | 3 | 3 | 2 |
| 2 | 2 | 2 | 2 | 3 | 2 | 3 |
| 2 | 3 | 1 | 1 | 2 | 2 | 3 |
| 3 | 2 | 1 | 1 | 2 | 1 | 3 |
| 1 | 2 | 1 | 1 | 1 | 1 | 2 |
| 2 | 1 | 1 | 1 | 1 | 1 | 3 |

|   |   |   |   |   |   |   |
|---|---|---|---|---|---|---|
| 1 | 2 | 2 | 2 | 2 | 1 | 2 |
| 2 | 3 | 2 | 2 | 2 | 2 | 3 |
| 1 | 1 | 1 | 1 | 1 | 1 | 3 |
| 1 | 1 | 1 | 1 | 1 | 1 | 2 |
| 2 | 2 | 2 | 2 | 2 | 2 | 2 |
| 2 | 2 | 2 | 2 | 2 | 2 | 3 |
| 3 | 1 | 2 | 2 | 1 | 1 | 3 |
| 3 | 1 | 2 | 2 | 2 | 2 | 3 |
| 1 | 1 | 1 | 1 | 1 | 1 | 1 |
| 1 | 1 | 1 | 1 | 1 | 1 | 1 |
| 1 | 1 | 1 | 1 | 1 | 1 | 1 |
| 1 | 1 | 1 | 1 | 1 | 1 | 1 |
| 2 | 2 | 2 | 2 | 2 | 2 | 3 |
| 1 | 1 | 1 | 1 | 1 | 1 | 2 |
| 2 | 2 | 2 | 2 | 2 | 2 | 2 |
| 1 | 2 | 1 | 1 | 1 | 2 | 3 |
| 2 | 2 | 2 | 2 | 2 | 2 | 3 |
| 2 | 2 | 2 | 2 | 2 | 2 | 2 |
| 2 | 2 | 3 | 2 | 2 | 2 | 3 |
| 2 | 2 | 2 | 2 | 2 | 2 | 4 |
| 2 | 1 | 1 | 1 | 1 | 1 | 2 |
| 1 | 1 | 1 | 1 | 1 | 1 | 3 |
| 1 | 1 | 1 | 1 | 1 | 1 | 2 |

|   |   |   |   |   |   |
|---|---|---|---|---|---|
| 1 | 1 | 1 | 2 | 2 | 3 |
| 2 | 3 | 3 | 3 | 2 | 3 |
| 1 | 1 | 2 | 2 | 2 | 3 |
| 2 | 2 | 2 | 2 | 2 | 3 |
| 3 | 2 | 3 | 3 | 2 | 3 |
| 3 | 2 | 3 | 3 | 2 | 3 |
| 3 | 1 | 2 | 2 | 2 | 3 |
| 2 | 1 | 2 | 2 | 2 | 3 |
| 1 | 1 | 1 | 1 | 1 | 1 |
| 2 | 2 | 2 | 2 | 2 | 3 |
| 1 | 1 | 1 | 1 | 1 | 1 |
| 2 | 2 | 2 | 2 | 2 | 3 |
| 2 | 2 | 2 | 2 | 2 | 3 |
| 2 | 2 | 2 | 3 | 2 | 4 |

|   |   |   |   |   |   |   |
|---|---|---|---|---|---|---|
| 2 | 2 | 2 | 2 | 2 | 2 | 3 |
| 2 | 2 | 2 | 2 | 2 | 2 | 3 |
| 3 | 2 | 3 | 3 | 3 | 2 | 3 |
| 2 | 3 | 3 | 3 | 3 | 2 | 2 |
| 1 | 1 | 1 | 1 | 1 | 2 | 3 |
| 2 | 2 | 1 | 2 | 2 | 2 | 3 |
| 2 | 2 | 2 | 2 | 2 | 2 | 3 |
| 1 | 1 | 1 | 1 | 1 | 2 | 3 |
| 2 | 1 | 1 | 2 | 2 | 2 | 4 |

|   |   |   |   |   |   |   |
|---|---|---|---|---|---|---|
| 2 | 2 | 1 | 1 | 1 | 1 | 2 |
| 3 | 3 | 2 | 2 | 2 | 2 | 2 |
| 2 | 1 | 1 | 1 | 1 | 1 | 2 |
| 3 | 2 | 1 | 1 | 1 | 1 | 3 |
| 2 | 2 | 2 | 2 | 2 | 1 | 2 |
| 2 | 2 | 2 | 2 | 2 | 1 | 2 |
| 3 | 2 | 2 | 2 | 1 | 1 | 3 |
| 3 | 1 | 2 | 2 | 1 | 1 | 3 |
| 1 | 1 | 1 | 1 | 1 | 1 | 1 |
| 3 | 2 | 2 | 2 | 2 | 2 | 2 |
| 1 | 1 | 1 | 1 | 1 | 1 | 1 |
| 2 | 2 | 2 | 2 | 1 | 1 | 2 |
| 2 | 2 | 2 | 2 | 1 | 1 | 2 |
| 2 | 2 | 2 | 2 | 1 | 1 | 2 |
| 3 | 2 | 2 | 2 | 1 | 1 | 2 |
| 2 | 2 | 1 | 2 | 1 | 1 | 2 |
| 3 | 4 | 2 | 2 | 3 | 2 | 1 |
| 2 | 1 | 1 | 1 | 1 | 1 | 2 |
| 2 | 1 | 2 | 2 | 1 | 1 | 2 |
| 3 | 2 | 1 | 1 | 1 | 1 | 2 |
| 1 | 1 | 1 | 1 | 1 | 1 | 2 |
| 3 | 1 | 1 | 1 | 1 | 1 | 2 |

|   |   |   |   |   |   |   |
|---|---|---|---|---|---|---|
| 1 | 1 | 1 | 1 | 1 | 1 | 3 |
| 2 | 2 | 2 | 2 | 2 | 2 | 3 |
| 2 | 2 | 2 | 2 | 1 | 2 | 4 |
| 2 | 2 | 2 | 2 | 2 | 2 | 4 |
| 2 | 2 | 2 | 2 | 2 | 2 | 4 |
| 2 | 2 | 2 | 2 | 2 | 2 | 3 |
| 2 | 2 | 2 | 2 | 2 | 2 | 3 |
| 3 | 2 | 2 | 2 | 2 | 2 | 4 |
| 3 | 1 | 2 | 2 | 2 | 2 | 4 |
| 1 | 1 | 1 | 1 | 1 | 1 | 1 |
| 2 | 2 | 2 | 2 | 2 | 2 | 4 |

|   |   |   |   |   |   |   |
|---|---|---|---|---|---|---|
| 1 | 1 | 1 | 1 | 1 | 1 | 1 |
| 2 | 2 | 2 | 2 | 1 | 2 | 3 |
| 1 | 1 | 1 | 1 | 1 | 1 | 3 |
| 2 | 2 | 2 | 2 | 2 | 2 | 4 |
| 2 | 2 | 2 | 2 | 1 | 2 | 3 |
| 3 | 3 | 2 | 2 | 2 | 2 | 3 |
| 3 | 3 | 3 | 3 | 2 | 2 | 1 |
| 2 | 2 | 2 | 2 | 1 | 2 | 3 |
| 1 | 1 | 1 | 1 | 1 | 2 | 3 |
| 2 | 1 | 1 | 1 | 1 | 1 | 2 |
| 1 | 2 | 2 | 2 | 1 | 1 | 3 |
| 1 | 1 | 1 | 1 | 1 | 1 | 2 |

|   |   |   |   |   |   |   |
|---|---|---|---|---|---|---|
| 1 | 2 | 2 | 2 | 2 | 2 | 3 |
| 3 | 3 | 3 | 3 | 2 | 3 | 4 |
| 1 | 2 | 2 | 2 | 1 | 2 | 4 |
| 1 | 2 | 1 | 1 | 2 | 2 | 3 |
| 2 | 2 | 2 | 2 | 2 | 2 | 3 |
| 2 | 2 | 2 | 2 | 2 | 2 | 3 |
| 3 | 2 | 2 | 2 | 2 | 2 | 4 |
| 3 | 1 | 2 | 2 | 2 | 2 | 4 |
| 1 | 1 | 1 | 1 | 1 | 1 | 1 |
| 3 | 3 | 3 | 3 | 2 | 3 | 4 |
| 1 | 1 | 1 | 1 | 1 | 1 | 1 |
| 2 | 2 | 2 | 2 | 2 | 3 | 4 |
| 1 | 1 | 1 | 1 | 2 | 2 | 3 |
| 2 | 2 | 2 | 2 | 2 | 2 | 3 |
| 1 | 1 | 1 | 1 | 2 | 2 | 2 |
| 2 | 3 | 2 | 2 | 2 | 3 | 3 |
| 3 | 4 | 4 | 4 | 4 | 3 | 2 |
| 2 | 3 | 3 | 3 | 2 | 3 | 4 |
| 2 | 3 | 2 | 2 | 2 | 2 | 4 |
| 2 | 1 | 1 | 1 | 1 | 2 | 2 |
| 1 | 1 | 1 | 1 | 2 | 2 | 4 |
| 1 | 1 | 1 | 1 | 1 | 1 | 2 |

|   |   |   |   |   |   |   |
|---|---|---|---|---|---|---|
| 1 | 1 | 1 | 1 | 1 | 2 | 2 |
| 2 | 2 | 2 | 2 | 2 | 2 | 3 |
| 1 | 2 | 1 | 1 | 2 | 2 | 3 |
| 2 | 2 | 1 | 1 | 2 | 2 | 4 |
| 2 | 2 | 2 | 2 | 2 | 2 | 3 |
| 2 | 2 | 2 | 2 | 2 | 2 | 3 |
| 3 | 2 | 2 | 2 | 2 | 2 | 4 |

|   |   |   |   |   |   |
|---|---|---|---|---|---|
| 2 | 1 | 1 | 2 | 2 | 3 |
| 2 | 2 | 2 | 2 | 2 | 2 |
| 1 | 1 | 1 | 1 | 1 | 1 |
| 1 | 1 | 1 | 1 | 1 | 1 |
| 1 | 1 | 1 | 1 | 1 | 3 |
| 2 | 2 | 1 | 2 | 2 | 3 |
| 2 | 2 | 2 | 2 | 2 | 3 |
| 2 | 2 | 1 | 2 | 2 | 3 |
| 2 | 3 | 2 | 2 | 2 | 3 |
| 2 | 3 | 3 | 2 | 2 | 3 |
| 1 | 1 | 1 | 1 | 1 | 1 |
| 1 | 1 | 1 | 1 | 1 | 2 |
| 2 | 1 | 1 | 1 | 1 | 2 |
| 1 | 2 | 1 | 1 | 1 | 3 |
| 2 | 1 | 1 | 1 | 1 | 4 |

|   |   |   |   |   |   |
|---|---|---|---|---|---|
| 2 | 2 | 2 | 1 | 2 | 3 |
| 3 | 3 | 2 | 2 | 3 | 3 |
| 1 | 2 | 1 | 2 | 2 | 3 |
| 2 | 2 | 1 | 2 | 2 | 3 |
| 3 | 3 | 2 | 2 | 2 | 3 |
| 2 | 2 | 2 | 2 | 2 | 3 |
| 3 | 2 | 2 | 2 | 2 | 4 |
| 2 | 2 | 2 | 2 | 2 | 4 |
| 3 | 3 | 2 | 2 | 2 | 3 |
| 1 | 1 | 1 | 1 | 1 | 1 |
| 1 | 1 | 1 | 1 | 1 | 1 |
| 1 | 2 | 1 | 1 | 2 | 3 |
| 2 | 2 | 2 | 2 | 2 | 3 |
| 3 | 2 | 2 | 2 | 2 | 4 |
| 2 | 3 | 2 | 2 | 2 | 3 |
| 3 | 4 | 3 | 3 | 3 | 3 |
| 2 | 3 | 3 | 3 | 2 | 2 |
| 1 | 2 | 2 | 1 | 2 | 3 |
| 2 | 2 | 2 | 1 | 2 | 2 |
| 2 | 1 | 1 | 1 | 2 | 3 |
| 1 | 1 | 1 | 1 | 1 | 3 |
| 2 | 1 | 1 | 2 | 2 | 3 |

|   |   |   |   |   |   |
|---|---|---|---|---|---|
| 1 | 1 | 1 | 1 | 1 | 1 |
| 2 | 2 | 2 | 2 | 2 | 1 |
| 1 | 1 | 1 | 1 | 1 | 1 |
| 1 | 1 | 1 | 1 | 2 | 1 |

|   |   |   |   |   |   |
|---|---|---|---|---|---|
| 2 | 2 | 2 | 2 | 1 | 1 |
| 2 | 2 | 2 | 2 | 2 | 1 |
| 2 | 2 | 1 | 1 | 1 | 1 |
| 2 | 1 | 2 | 2 | 2 | 1 |
| 2 | 2 | 2 | 2 | 2 | 2 |
| 2 | 2 | 2 | 2 | 2 | 2 |
| 1 | 1 | 1 | 1 | 1 | 1 |
| 2 | 1 | 1 | 1 | 1 | 1 |
| 2 | 2 | 2 | 2 | 2 | 1 |
| 1 | 1 | 1 | 1 | 1 | 1 |
| 2 | 2 | 2 | 2 | 1 | 1 |
| 2 | 2 | 2 | 3 | 2 | 2 |
| 1 | 1 | 1 | 1 | 1 | 1 |
| 1 | 1 | 1 | 1 | 1 | 1 |
| 1 | 1 | 1 | 1 | 1 | 1 |
| 1 | 1 | 1 | 1 | 1 | 1 |

|   |   |   |   |   |   |
|---|---|---|---|---|---|
| 2 | 2 | 2 | 1 | 1 | 2 |
| 2 | 3 | 3 | 2 | 2 | 2 |
| 2 | 2 | 1 | 1 | 1 | 1 |
| 2 | 2 | 2 | 2 | 2 | 2 |
| 3 | 3 | 3 | 2 | 2 | 2 |
| 3 | 3 | 2 | 2 | 2 | 2 |
| 3 | 2 | 2 | 2 | 1 | 2 |
| 3 | 1 | 2 | 2 | 2 | 2 |
| 3 | 3 | 3 | 2 | 2 | 2 |
| 2 | 2 | 2 | 2 | 2 | 2 |
| 2 | 2 | 2 | 2 | 2 | 2 |
| 2 | 2 | 2 | 2 | 2 | 2 |
| 2 | 2 | 2 | 2 | 2 | 2 |
| 2 | 2 | 2 | 2 | 2 | 2 |
| 2 | 2 | 2 | 2 | 2 | 2 |
| 3 | 2 | 2 | 2 | 2 | 2 |
| 2 | 2 | 2 | 1 | 1 | 2 |
| 3 | 3 | 3 | 2 | 2 | 2 |
| 2 | 2 | 3 | 3 | 3 | 2 |
| 2 | 2 | 1 | 1 | 1 | 1 |
| 2 | 2 | 1 | 1 | 1 | 2 |
| 2 | 2 | 1 | 1 | 1 | 1 |
| 1 | 1 | 1 | 1 | 1 | 1 |
| 2 | 1 | 1 | 1 | 1 | 1 |

|   |   |   |   |   |   |
|---|---|---|---|---|---|
| 4 | 4 | 2 | 3 | 2 | 4 |
|---|---|---|---|---|---|

|   |   |   |   |   |   |
|---|---|---|---|---|---|
| 3 | 4 | 2 | 3 | 2 | 3 |
| 3 | 3 | 2 | 3 | 3 | 3 |
| 4 | 3 | 3 | 3 | 3 | 4 |
| 4 | 4 | 3 | 3 | 3 | 3 |
| 4 | 4 | 3 | 3 | 3 | 3 |
| 3 | 3 | 3 | 3 | 3 | 4 |
| 3 | 2 | 3 | 3 | 3 | 1 |
| 1 | 2 | 1 | 1 | 1 | 1 |
| 1 | 1 | 1 | 1 | 1 | 1 |
| 1 | 1 | 1 | 1 | 1 | 1 |
| 3 | 3 | 3 | 3 | 3 | 4 |
| 4 | 4 | 3 | 4 | 3 | 4 |
| 4 | 3 | 3 | 3 | 3 | 3 |
| 3 | 3 | 2 | 2 | 2 | 3 |
| 3 | 4 | 3 | 3 | 3 | 3 |
| 3 | 4 | 4 | 1 | 2 | 2 |
| 3 | 2 | 2 | 3 | 3 | 3 |
| 3 | 4 | 3 | 2 | 2 | 3 |
| 1 | 3 | 2 | 1 | 2 | 2 |
| 4 | 2 | 1 | 1 | 2 | 4 |
| 4 | 2 | 2 | 2 | 2 |   |

|   |   |   |   |   |   |
|---|---|---|---|---|---|
| 4 | 4 | 4 | 3 | 3 | 4 |
| 4 | 4 | 4 | 4 | 4 | 4 |
| 4 | 3 | 3 | 4 | 4 | 4 |
| 4 | 4 | 4 | 4 | 4 | 4 |
| 4 | 4 | 4 | 3 | 4 | 3 |
| 4 | 4 | 4 | 4 | 4 | 4 |
| 4 | 4 | 4 | 4 | 4 | 4 |
| 4 | 4 | 4 | 4 | 4 | 4 |
| 4 | 4 | 4 | 4 | 4 | 4 |
| 4 | 2 | 4 | 4 | 4 | 4 |
| 4 | 4 | 4 | 4 | 4 | 4 |
| 4 | 4 | 3 | 3 | 4 | 4 |
| 4 | 4 | 4 | 4 | 4 | 4 |
| 1 | 1 | 2 | 1 | 2 | 2 |
| 4 | 4 | 3 | 3 | 3 | 4 |
| 4 | 4 | 4 | 4 | 4 | 4 |
| 4 | 4 | 4 | 4 | 4 | 4 |
| 4 | 4 | 4 | 4 | 4 | 4 |
| 4 | 4 | 4 | 4 | 4 | 4 |
| 3 | 4 | 4 | 4 | 4 | 4 |
| 4 | 3 | 4 | 4 | 4 | 3 |
| 3 | 3 | 4 | 4 | 4 | 4 |
| 3 | 4 | 4 | 3 | 3 | 4 |
| 4 | 4 | 4 | 3 | 4 | 4 |
| 3 | 3 | 3 | 3 | 3 | 4 |
| 4 | 2 | 2 | 2 | 2 | 3 |

|   |   |   |   |   |   |   |
|---|---|---|---|---|---|---|
| 1 | 1 | 1 | 1 | 1 | 1 | 3 |
| 2 | 2 | 2 | 2 | 2 | 2 | 3 |
| 1 | 1 | 1 | 1 | 1 | 1 | 3 |
| 1 | 1 | 1 | 1 | 1 | 1 | 3 |
| 2 | 2 | 2 | 2 | 2 | 2 | 3 |
| 2 | 2 | 2 | 2 | 2 | 2 | 4 |
| 3 | 1 | 2 | 2 | 1 | 1 | 3 |
| 2 | 1 | 1 | 1 | 1 | 1 | 3 |
| 2 | 2 | 2 | 2 | 1 | 2 | 2 |
| 2 | 2 | 2 | 2 | 2 | 2 | 4 |
| 2 | 2 | 2 | 2 | 2 | 2 | 3 |
| 1 | 1 | 1 | 1 | 1 | 1 | 1 |
| 1 | 1 | 1 | 1 | 1 | 1 | 2 |
| 2 | 2 | 2 | 2 | 2 | 2 | 2 |
| 2 | 2 | 1 | 2 | 1 | 1 | 3 |
| 2 | 2 | 2 | 2 | 2 | 2 | 3 |
| 2 | 2 | 2 | 2 | 2 | 1 | 2 |
| 2 | 2 | 2 | 2 | 2 | 2 | 4 |
| 2 | 2 | 2 | 2 | 1 | 1 | 3 |
| 2 | 1 | 1 | 1 | 1 | 1 | 2 |
| 1 | 2 | 2 | 2 | 2 | 2 | 4 |
| 1 | 1 | 1 | 1 | 1 | 1 | 1 |

|   |   |   |   |   |   |   |
|---|---|---|---|---|---|---|
| 1 | 2 | 2 | 2 | 2 | 2 | 3 |
| 2 | 2 | 3 | 2 | 2 | 2 | 3 |
| 1 | 1 | 2 | 2 | 1 | 2 | 3 |
| 1 | 2 | 2 | 2 | 1 | 2 | 3 |
| 2 | 2 | 2 | 2 | 2 | 2 | 2 |
| 2 | 2 | 2 | 2 | 2 | 2 | 3 |
| 3 | 2 | 2 | 2 | 2 | 3 | 4 |
| 3 | 1 | 2 | 2 | 2 | 2 | 4 |
| 2 | 3 | 2 | 2 | 2 | 2 | 3 |
| 2 | 2 | 2 | 2 | 2 | 2 | 2 |
| 2 | 2 | 1 | 1 | 1 | 1 | 1 |
| 1 | 1 | 1 | 1 | 1 | 1 | 2 |
| 1 | 2 | 2 | 2 | 2 | 2 | 3 |
| 2 | 2 | 2 | 2 | 2 | 2 | 4 |
| 2 | 3 | 2 | 2 | 2 | 2 | 4 |
| 3 | 4 | 3 | 3 | 2 | 3 | 3 |
| 3 | 2 | 3 | 3 | 3 | 2 | 2 |
| 1 | 1 | 2 | 2 | 1 | 2 | 3 |
| 1 | 2 | 2 | 2 | 1 | 2 | 3 |
| 2 | 2 | 1 | 1 | 1 | 1 | 2 |
| 1 | 2 | 2 | 2 | 1 | 2 | 3 |

|   |   |   |   |   |   |   |   |
|---|---|---|---|---|---|---|---|
| 2 | 1 | 1 | 1 | 1 | 1 | 1 | 3 |
| 2 | 2 | 1 | 2 | 1 | 1 | 1 | 1 |
| 2 | 2 | 1 | 2 | 2 | 2 | 2 | 2 |
| 2 | 1 | 1 | 1 | 1 | 1 | 1 | 1 |
| 1 | 1 | 1 | 1 | 1 | 1 | 1 | 1 |
| 3 | 2 | 1 | 1 | 1 | 1 | 1 | 1 |
| 2 | 2 | 1 | 1 | 2 | 2 | 1 | 2 |
| 2 | 1 | 1 | 1 | 1 | 1 | 1 | 1 |
| 3 | 1 | 1 | 1 | 1 | 1 | 1 | 1 |
| 2 | 2 | 2 | 1 | 2 | 2 | 1 | 1 |
| 2 | 2 | 2 | 2 | 2 | 2 | 2 | 2 |
| 2 | 2 | 2 | 2 | 2 | 2 | 2 | 2 |
| 1 | 1 | 1 | 1 | 1 | 1 | 1 | 1 |
| 1 | 1 | 1 | 1 | 1 | 1 | 1 | 1 |
| 2 | 2 | 2 | 1 | 2 | 1 | 1 | 1 |
| 2 | 2 | 2 | 1 | 1 | 1 | 1 | 1 |
| 3 | 2 | 1 | 1 | 2 | 1 | 1 | 1 |
| 3 | 3 | 3 | 3 | 1 | 2 | 2 | 1 |
| 2 | 1 | 1 | 1 | 1 | 1 | 1 | 1 |
| 2 | 2 | 2 | 1 | 1 | 1 | 1 | 1 |
| 2 | 1 | 1 | 1 | 1 | 1 | 1 | 1 |
| 1 | 1 | 1 | 1 | 1 | 1 | 1 | 1 |
| 2 | 1 | 1 | 1 | 1 | 1 | 1 | 1 |

|   |   |   |   |   |   |   |   |
|---|---|---|---|---|---|---|---|
| 2 | 2 | 2 | 2 | 2 | 2 | 2 | 3 |
| 2 | 3 | 3 | 2 | 2 | 2 | 3 | 3 |
| 1 | 2 | 2 | 2 | 2 | 2 | 2 | 3 |
| 2 | 2 | 2 | 2 | 3 | 3 | 3 | 3 |
| 1 | 2 | 2 | 1 | 2 | 2 | 1 | 2 |
| 2 | 2 | 2 | 2 | 2 | 2 | 2 | 3 |
| 3 | 3 | 3 | 3 | 3 | 3 | 4 | 4 |
| 3 | 2 | 2 | 2 | 2 | 2 | 3 | 4 |
| 3 | 3 | 3 | 3 | 2 | 2 | 2 | 3 |
| 2 | 2 | 2 | 2 | 2 | 2 | 2 | 4 |
| 2 | 2 | 2 | 3 | 3 | 3 | 3 | 4 |
| 2 | 2 | 2 | 2 | 2 | 2 | 2 | 4 |
| 3 | 3 | 3 | 3 | 3 | 3 | 3 | 4 |
| 2 | 2 | 2 | 2 | 2 | 2 | 2 | 3 |
| 2 | 3 | 3 | 2 | 2 | 2 | 2 | 2 |
| 2 | 3 | 3 | 2 | 2 | 2 | 2 | 2 |
| 3 | 3 | 3 | 3 | 3 | 3 | 2 | 2 |
| 2 | 2 | 2 | 2 | 3 | 3 | 2 | 3 |

|   |   |   |   |   |   |
|---|---|---|---|---|---|
| 2 | 2 | 2 | 3 | 3 | 4 |
| 2 | 2 | 2 | 2 | 2 | 3 |
| 3 | 3 | 1 | 2 | 3 | 4 |
| 2 | 1 | 1 | 1 | 1 | 2 |

|   |   |   |   |   |   |
|---|---|---|---|---|---|
| 2 | 2 | 1 | 1 | 1 | 2 |
| 3 | 3 | 2 | 2 | 2 | 2 |
| 3 | 2 | 2 | 2 | 2 | 3 |
| 3 | 2 | 2 | 3 | 3 | 4 |
| 2 | 2 | 2 | 2 | 2 | 2 |
| 3 | 3 | 2 | 2 | 2 | 3 |
| 4 | 2 | 2 | 2 | 2 | 4 |
| 4 | 2 | 2 | 3 | 3 | 3 |
| 3 | 2 | 2 | 2 | 2 | 2 |
| 3 | 2 | 2 | 3 | 2 | 3 |
| 3 | 3 | 2 | 2 | 2 | 3 |
| 3 | 2 | 2 | 2 | 2 | 3 |
| 3 | 3 | 2 | 2 | 2 | 3 |
| 3 | 3 | 2 | 2 | 2 | 2 |
| 3 | 2 | 3 | 2 | 2 | 1 |
| 2 | 1 | 1 | 2 | 1 | 2 |
| 2 | 2 | 1 | 2 | 2 | 3 |
| 3 | 1 | 1 | 1 | 1 | 2 |
| 2 | 1 | 1 | 1 | 1 | 3 |
| 3 | 1 | 1 | 1 | 1 | 3 |

|   |   |   |   |   |   |
|---|---|---|---|---|---|
| 4 | 4 | 3 | 2 | 3 | 3 |
| 3 | 4 | 3 | 3 | 3 | 3 |
| 4 | 3 | 3 | 3 | 3 | 4 |
| 4 | 4 | 2 | 3 | 3 | 4 |
| 4 | 4 | 4 | 3 | 4 | 3 |
| 4 | 4 | 4 | 3 | 3 | 3 |
| 4 | 4 | 4 | 4 | 4 | 4 |
| 4 | 3 | 4 | 3 | 4 | 4 |
| 4 | 4 | 3 | 2 | 3 | 3 |
| 4 | 3 | 3 | 3 | 3 | 4 |
| 4 | 4 | 4 | 4 | 4 | 4 |
| 4 | 4 | 4 | 4 | 4 | 4 |
| 4 | 4 | 4 | 4 | 4 | 4 |
| 4 | 4 | 3 | 3 | 3 | 4 |
| 4 | 3 | 3 | 3 | 3 | 3 |
| 3 | 3 | 2 | 2 | 2 | 2 |

|   |   |   |   |   |   |
|---|---|---|---|---|---|
| 4 | 4 | 3 | 2 | 3 | 3 |
| 3 | 3 | 3 | 3 | 2 | 2 |
| 3 | 4 | 3 | 3 | 3 | 3 |
| 4 | 4 | 3 | 4 | 3 | 4 |
| 4 | 3 | 2 | 2 | 2 | 3 |
| 2 | 3 | 2 | 2 | 2 | 3 |
| 4 | 2 | 2 | 2 | 2 | 2 |

|   |   |   |   |   |   |
|---|---|---|---|---|---|
| 1 | 1 | 1 | 1 | 2 | 3 |
| 2 | 2 | 2 | 2 | 2 | 3 |
| 1 | 1 | 1 | 2 | 1 | 3 |
| 2 | 2 | 2 | 2 | 2 | 3 |
| 3 | 2 | 2 | 3 | 2 | 3 |
| 2 | 2 | 2 | 2 | 1 | 3 |
| 3 | 1 | 2 | 2 | 2 | 4 |
| 3 | 1 | 2 | 2 | 2 | 3 |
| 3 | 2 | 2 | 3 | 2 | 3 |
| 2 | 2 | 2 | 2 | 2 | 3 |
| 2 | 2 | 2 | 2 | 2 | 3 |
| 1 | 2 | 1 | 2 | 2 | 3 |
| 2 | 1 | 1 | 2 | 2 | 4 |
| 2 | 2 | 2 | 2 | 2 | 3 |
| 2 | 2 | 1 | 2 | 1 | 2 |
| 2 | 3 | 2 | 3 | 2 | 2 |
| 2 | 3 | 2 | 2 | 2 | 1 |
| 1 | 2 | 1 | 1 | 2 | 3 |
| 2 | 2 | 1 | 2 | 1 | 4 |
| 2 | 1 | 1 | 1 | 1 | 2 |
| 1 | 2 | 1 | 1 | 2 | 3 |
| 2 | 1 | 1 | 1 | 1 | 2 |

|   |   |   |   |   |   |
|---|---|---|---|---|---|
| 2 | 2 | 1 | 1 | 1 | 2 |
| 2 | 2 | 2 | 3 | 2 | 3 |
| 2 | 1 | 1 | 2 | 2 | 4 |
| 2 | 2 | 1 | 2 | 2 | 4 |
| 3 | 2 | 2 | 3 | 2 | 3 |
| 2 | 2 | 2 | 2 | 2 | 3 |
| 3 | 2 | 1 | 2 | 2 | 3 |
| 2 | 1 | 1 | 2 | 2 | 4 |
| 2 | 2 | 2 | 2 | 2 | 3 |
| 2 | 2 | 2 | 2 | 2 | 3 |
| 2 | 2 | 2 | 3 | 2 | 4 |
| 2 | 2 | 2 | 2 | 2 | 3 |
| 1 | 1 | 1 | 2 | 2 | 3 |

|   |   |   |   |   |   |
|---|---|---|---|---|---|
| 2 | 2 | 1 | 2 | 2 | 3 |
| 2 | 2 | 2 | 2 | 2 | 3 |
| 2 | 1 | 1 | 1 | 1 | 3 |
| 2 | 2 | 2 | 2 | 2 | 2 |
| 2 | 2 | 2 | 1 | 2 | 1 |
| 1 | 1 | 1 | 1 | 1 | 3 |
| 2 | 1 | 1 | 1 | 2 | 3 |
| 2 | 1 | 1 | 1 | 1 | 3 |
| 1 | 1 | 1 | 1 | 1 | 2 |
| 2 | 1 | 1 | 1 | 2 | 3 |

|   |   |   |   |   |   |
|---|---|---|---|---|---|
| 1 | 2 | 1 | 2 | 1 | 3 |
| 2 | 3 | 2 | 3 | 2 | 3 |
| 1 | 1 | 1 | 2 | 1 | 3 |
| 2 | 2 | 2 | 2 | 2 | 3 |
| 2 | 3 | 2 | 4 | 2 | 3 |
| 2 | 2 | 2 | 3 | 2 | 4 |
| 2 | 1 | 1 | 2 | 1 | 3 |
| 3 | 1 | 1 | 2 | 1 | 3 |
| 2 | 3 | 2 | 2 | 2 | 3 |
| 2 | 2 | 2 | 2 | 2 | 3 |
| 2 | 2 | 2 | 2 | 2 | 3 |
| 2 | 2 | 2 | 2 | 1 | 4 |
| 1 | 1 | 1 | 2 | 1 | 3 |
| 2 | 2 | 2 | 3 | 2 | 3 |
| 1 | 2 | 1 | 2 | 1 | 2 |
| 2 | 2 | 2 | 2 | 2 | 3 |
| 2 | 3 | 2 | 1 | 2 | 1 |
| 1 | 2 | 1 | 3 | 1 | 3 |
| 2 | 1 | 2 | 2 | 1 | 2 |
| 1 | 1 | 1 | 1 | 1 | 2 |
| 1 | 1 | 1 | 1 | 1 | 3 |
| 2 | 1 | 1 | 2 | 1 | 4 |

|   |   |   |   |   |   |
|---|---|---|---|---|---|
| 1 | 1 | 1 | 2 | 1 | 3 |
| 2 | 3 | 2 | 3 | 2 | 4 |
| 2 | 2 | 1 | 3 | 2 | 4 |
| 3 | 2 | 2 | 3 | 2 | 4 |
| 2 | 2 | 2 | 4 | 2 | 3 |
| 2 | 2 | 2 | 3 | 2 | 3 |
| 2 | 1 | 1 | 3 | 1 | 3 |
| 3 | 1 | 1 | 3 | 2 | 3 |
| 2 | 2 | 2 | 3 | 2 | 3 |

|   |   |   |   |   |   |   |
|---|---|---|---|---|---|---|
| 2 | 2 | 2 | 2 | 2 | 2 | 4 |
| 2 | 2 | 2 | 2 | 3 | 2 | 3 |
| 2 | 2 | 2 | 2 | 3 | 2 | 4 |
| 2 | 2 | 1 | 2 | 3 | 2 | 3 |
| 2 | 2 | 2 | 2 | 3 | 2 | 3 |
| 1 | 1 | 1 | 1 | 2 | 1 | 2 |
| 2 | 3 | 2 | 2 | 3 | 2 | 3 |
| 2 | 2 | 2 | 2 | 2 | 2 | 1 |
| 2 | 2 | 2 | 2 | 3 | 2 | 3 |
| 2 | 2 | 2 | 2 | 3 | 3 | 4 |
| 2 | 1 | 1 | 1 | 1 | 1 | 3 |
| 1 | 1 | 1 | 1 | 1 | 1 | 2 |
| 2 | 1 | 1 | 1 | 1 | 1 | 2 |

|   |   |   |   |   |   |
|---|---|---|---|---|---|
| 3 | 3 | 2 | 2 | 3 | 4 |
| 4 | 4 | 3 | 3 | 4 | 4 |
| 4 | 4 | 4 | 4 | 4 | 4 |
| 4 | 4 | 4 | 4 | 4 | 4 |
| 4 | 4 | 3 | 4 | 4 | 4 |
| 3 | 3 | 4 | 4 | 3 | 3 |
| 4 | 4 | 3 | 4 | 3 | 3 |
| 3 | 3 | 3 | 4 | 3 | 2 |
| 3 | 2 | 3 | 4 | 4 | 4 |
| 4 | 4 | 3 | 3 | 3 | 3 |
| 4 | 4 | 3 | 4 | 4 | 4 |
| 4 | 4 | 4 | 4 | 4 | 4 |
| 4 | 4 | 4 | 4 | 4 | 4 |
| 4 | 4 | 3 | 4 | 4 | 4 |
| 3 | 4 | 2 | 3 | 3 | 4 |
| 4 | 3 | 3 | 4 | 4 | 4 |
| 4 | 4 | 2 | 3 | 4 | 4 |
| 3 | 3 | 3 | 2 | 2 | 3 |
| 3 | 4 | 4 | 3 | 3 | 3 |
| 3 | 3 | 2 | 2 | 2 | 2 |
| 4 | 3 | 3 | 3 | 3 | 3 |
| 3 | 3 | 2 | 3 | 3 | 4 |
| 4 | 4 | 3 | 3 | 3 | 4 |
| 2 | 3 | 2 | 3 | 3 | 3 |
| 4 | 2 | 1 | 2 | 2 | 3 |

|   |   |   |   |   |   |
|---|---|---|---|---|---|
| 4 | 4 | 3 | 3 | 3 | 4 |
| 4 | 4 | 4 | 4 | 4 | 4 |
| 4 | 4 | 3 | 4 | 4 | 4 |
| 4 | 3 | 2 | 3 | 3 | 4 |
| 4 | 4 | 4 | 4 | 4 | 4 |
| 4 | 4 | 3 | 4 | 3 | 4 |

|   |   |   |   |   |   |
|---|---|---|---|---|---|
| 4 | 4 | 3 | 4 | 3 | 2 |
| 3 | 2 | 2 | 3 | 3 | 3 |
| 4 | 4 | 3 | 3 | 3 | 3 |
| 4 | 4 | 4 | 4 | 4 | 4 |
| 4 | 4 | 4 | 4 | 4 | 4 |
| 4 | 4 | 3 | 4 | 4 | 4 |
| 4 | 4 | 3 | 3 | 3 | 4 |
| 4 | 3 | 3 | 4 | 4 | 4 |
| 3 | 3 | 2 | 2 | 2 | 3 |
| 4 | 4 | 3 | 3 | 3 | 3 |
| 3 | 4 | 4 | 3 | 3 | 3 |
| 4 | 4 | 3 | 4 | 4 | 4 |
| 4 | 4 | 4 | 4 | 4 | 4 |
| 4 | 4 | 3 | 3 | 3 | 4 |
| 2 | 4 | 2 | 3 | 3 | 4 |
| 4 | 2 | 1 | 2 | 2 | 3 |

|   |   |   |   |   |   |
|---|---|---|---|---|---|
| 4 | 4 | 1 | 2 | 2 | 4 |
| 4 | 4 | 3 | 3 | 3 | 4 |
| 4 | 4 | 2 | 3 | 3 | 4 |
| 4 | 4 | 2 | 3 | 3 | 4 |
| 4 | 4 | 3 | 4 | 3 | 3 |
| 4 | 4 | 3 | 3 | 3 | 4 |
| 4 | 4 | 3 | 4 | 3 | 4 |
| 4 | 3 | 3 | 4 | 4 | 4 |
| 4 | 4 | 3 | 3 | 3 | 3 |
| 4 | 3 | 2 | 3 | 3 | 4 |
| 4 | 4 | 3 | 3 | 3 | 4 |
| 4 | 3 | 2 | 3 | 3 | 4 |
| 3 | 3 | 2 | 3 | 3 | 4 |
| 4 | 3 | 2 | 3 | 3 | 4 |
| 3 | 3 | 2 | 2 | 2 | 3 |
| 4 | 4 | 3 | 3 | 3 | 4 |
| 3 | 4 | 4 | 2 | 3 | 2 |
| 3 | 3 | 2 | 2 | 2 | 3 |
| 4 | 2 | 1 | 2 | 2 | 4 |
| 4 | 3 | 2 | 3 | 3 | 4 |
| 3 | 3 | 2 | 3 | 2 | 4 |
| 4 | 2 | 1 | 3 | 2 | 4 |

|   |   |   |   |   |   |
|---|---|---|---|---|---|
| 4 | 4 | 3 | 3 | 4 | 4 |
| 4 | 4 | 3 | 3 | 3 | 4 |
| 4 | 3 | 2 | 3 | 3 | 4 |

|   |   |   |   |   |   |
|---|---|---|---|---|---|
| 4 | 4 | 2 | 4 | 4 | 4 |
| 3 | 4 | 3 | 3 | 3 | 3 |
| 4 | 4 | 3 | 4 | 4 | 4 |
| 4 | 4 | 3 | 4 | 4 | 4 |
| 4 | 3 | 3 | 4 | 4 | 4 |
| 4 | 4 | 3 | 3 | 3 | 3 |
| 4 | 3 | 3 | 4 | 4 | 4 |
| 3 | 3 | 2 | 3 | 3 | 4 |
| 3 | 3 | 3 | 3 | 3 | 3 |
| 4 | 3 | 2 | 3 | 3 | 4 |
| 4 | 3 | 2 | 3 | 3 | 4 |
| 3 | 3 | 2 | 2 | 2 | 3 |
| 3 | 4 | 3 | 3 | 3 | 3 |
| 3 | 4 | 4 | 2 | 2 | 2 |
| 3 | 3 | 3 | 3 | 4 | 3 |
| 4 | 2 | 2 | 3 | 3 | 4 |
| 4 | 3 | 2 | 2 | 3 | 3 |
| 3 | 3 | 2 | 3 | 3 | 4 |
| 4 | 2 | 1 | 2 | 2 | 4 |

|   |   |   |   |   |   |
|---|---|---|---|---|---|
| 3 | 4 | 3 | 3 | 4 | 4 |
| 4 | 4 | 4 | 4 | 4 | 4 |
| 3 | 3 | 3 | 3 | 4 | 4 |
| 4 | 3 | 4 | 4 | 4 | 4 |
| 4 | 4 | 4 | 4 | 4 | 4 |
| 4 | 4 | 4 | 4 | 4 | 4 |
| 4 | 4 | 4 | 4 | 3 | 3 |
| 3 | 2 | 3 | 3 | 4 | 4 |
| 4 | 4 | 3 | 3 | 3 | 3 |
| 4 | 4 | 3 | 4 | 4 | 4 |
| 4 | 4 | 4 | 4 | 4 | 4 |
| 4 | 4 | 4 | 4 | 4 | 4 |
| 4 | 4 | 4 | 3 | 4 | 4 |
| 4 | 3 | 3 | 3 | 4 | 4 |
| 2 | 3 | 2 | 2 | 2 | 3 |
| 4 | 4 | 3 | 3 | 3 | 3 |
| 3 | 4 | 4 | 3 | 2 | 2 |
| 4 | 4 | 3 | 3 | 4 | 4 |
| 4 | 4 | 4 | 4 | 4 | 4 |
| 4 | 3 | 2 | 3 | 3 | 4 |
| 3 | 3 | 3 | 2 | 2 | 4 |
| 4 | 2 | 1 | 2 | 2 | 4 |

2  
3  
3  
3  
3  
3  
3  
3  
3  
3  
3  
3  
3  
3  
3  
3  
4  
2  
2  
3  
2  
1  
2

2  
3  
2  
2  
3  
2  
2  
3  
3  
3  
2  
2  
3  
4  
2  
2  
2  
2  
1  
1  
1

2  
2  
1  
2  
2  
2  
1  
2  
2  
2  
2  
2  
2  
3  
2  
2  
2  
2  
1  
1  
1

2  
3  
2  
3  
3  
2  
2  
2  
3  
2  
3  
2  
2  
3  
2  
2  
2  
2  
1  
1  
1

2  
2  
2  
2  
2  
1  
2  
2  
2  
3  
2  
2  
2  
3  
2  
2  
2  
1  
1  
1

3  
3  
3  
3  
3  
2  
2  
3  
3  
4  
4  
3  
3  
3  
2  
3  
4  
3  
2  
2

2  
2  
2  
2  
3  
3  
3  
3  
3  
3  
3  
3  
3  
3  
3  
2  
2  
3  
2  
2  
2  
2  
1  
3

3  
3  
2  
2  
3  
3  
2  
2  
3  
3  
4  
3  
2  
2  
3  
3  
2  
2  
3  
2  
2  
1

1  
2  
1  
1  
2  
2  
1  
1  
2  
2  
3  
2  
2  
1  
2  
2  
3  
2  
2  
1  
1

1  
2  
1  
1  
2  
2  
1  
2  
3  
3  
2  
2  
1  
2  
2  
2  
2  
2  
1  
1

1  
2  
1  
1  
2  
2  
1  
2  
3  
2  
3  
1  
2  
2  
2  
2  
2  
1  
1

2  
3  
3  
3  
3  
3  
4  
2  
3  
4  
4  
3  
2  
3  
2  
3  
2  
2  
2

|   |   |   |   |   |   |
|---|---|---|---|---|---|
| 2 | 3 | 3 | 3 | 3 | 4 |
| 3 | 3 | 4 | 3 | 3 | 3 |
| 3 | 3 | 3 | 3 | 3 | 4 |
| 3 | 3 | 4 | 4 | 4 | 4 |
| 3 | 3 | 4 | 4 | 3 | 3 |
| 3 | 3 | 4 | 4 | 3 | 4 |
| 3 | 2 | 3 | 3 | 2 | 3 |
| 3 | 2 | 3 | 3 | 3 | 4 |
| 3 | 3 | 4 | 3 | 3 | 3 |
| 3 | 3 | 4 | 3 | 3 | 4 |
| 3 | 3 | 4 | 4 | 3 | 4 |
| 3 | 3 | 3 | 3 | 3 | 4 |
| 3 | 2 | 3 | 3 | 3 | 4 |
| 2 | 3 | 2 | 2 | 2 | 3 |
| 3 | 3 | 3 | 3 | 3 | 3 |
| 3 | 2 | 2 | 2 | 2 | 2 |
| 2 | 3 | 4 | 3 | 4 | 4 |
| 3 | 3 | 3 | 3 | 3 | 4 |
| 2 | 2 | 2 | 2 | 2 | 3 |
| 3 | 1 | 2 | 2 | 2 | 4 |

|   |   |   |   |   |   |
|---|---|---|---|---|---|
| 1 | 1 | 1 | 1 | 1 | 1 |
| 2 | 2 | 2 | 2 | 2 | 2 |
| 1 | 1 | 1 | 1 | 1 | 2 |
| 1 | 1 | 1 | 1 | 1 | 1 |
| 2 | 2 | 2 | 2 | 2 | 2 |
| 2 | 2 | 2 | 2 | 2 | 2 |
| 2 | 2 | 2 | 2 | 2 | 3 |
| 2 | 1 | 1 | 1 | 1 | 2 |
| 1 | 1 | 1 | 1 | 1 | 1 |
| 1 | 2 | 2 | 2 | 2 | 2 |
| 2 | 2 | 2 | 2 | 2 | 2 |
| 2 | 2 | 2 | 2 | 2 | 2 |
| 2 | 2 | 2 | 2 | 2 | 2 |
| 2 | 2 | 2 | 2 | 2 | 2 |
| 1 | 1 | 1 | 1 | 1 | 2 |
| 1 | 1 | 1 | 1 | 1 | 1 |
| 2 | 1 | 2 | 2 | 2 | 2 |
| 1 | 1 | 1 | 1 | 1 | 1 |
| 2 | 2 | 2 | 2 | 2 | 2 |
| 2 | 2 | 2 | 2 | 2 | 2 |
| 2 | 3 | 2 | 2 | 2 | 1 |
| 1 | 1 | 2 | 2 | 1 | 2 |
| 2 | 2 | 1 | 1 | 1 | 2 |
| 1 | 1 | 1 | 1 | 1 | 1 |

|   |   |   |   |   |   |   |
|---|---|---|---|---|---|---|
| 1 | 1 | 2 | 1 | 2 | 2 | 1 |
| 1 | 1 | 1 | 1 | 1 | 1 | 1 |
| 2 | 2 | 2 | 1 | 1 | 3 |   |
| 3 | 3 | 3 | 2 | 2 | 4 |   |
| 3 | 2 | 2 | 2 | 1 | 4 |   |
| 3 | 2 | 2 | 2 | 1 | 3 |   |
| 3 | 3 | 2 | 2 | 2 | 3 |   |
| 2 | 2 | 2 | 2 | 2 | 3 |   |
| 4 | 2 | 2 | 2 | 2 | 3 |   |
| 3 | 1 | 2 | 2 | 2 | 3 |   |
| 2 | 2 | 2 | 2 | 1 | 2 |   |
| 3 | 2 | 3 | 2 | 3 | 4 |   |
| 3 | 2 | 2 | 2 | 2 | 3 |   |
| 3 | 2 | 2 | 2 | 2 | 3 |   |
| 2 | 2 | 2 | 1 | 1 | 3 |   |
| 3 | 1 | 1 | 2 | 2 | 2 |   |
| 2 | 2 | 2 | 2 | 2 | 2 |   |
| 3 | 2 | 3 | 2 | 2 | 1 |   |
| 3 | 3 | 3 | 3 | 3 | 4 |   |
| 3 | 2 | 2 | 1 | 2 | 4 |   |
| 2 | 2 | 3 | 2 | 1 | 2 |   |
| 2 | 1 | 1 | 1 | 2 | 4 |   |
|   |   |   |   | 1 | 1 |   |

|   |   |   |   |   |   |   |
|---|---|---|---|---|---|---|
| 3 | 2 | 1 | 1 | 1 | 1 | 1 |
| 1 | 1 | 1 | 1 | 1 | 1 | 1 |
| 4 | 2 | 1 | 1 | 1 | 1 | 1 |
| 4 | 2 | 1 | 2 | 1 | 1 | 1 |
| 4 | 3 | 2 | 2 | 2 | 2 | 1 |
| 4 | 3 | 2 | 1 | 1 | 1 | 1 |
| 4 | 2 | 1 | 1 | 1 | 1 | 1 |
| 3 | 1 | 1 | 2 | 1 | 1 | 1 |
| 4 | 3 | 2 | 2 | 2 | 2 | 2 |
| 4 | 3 | 2 | 2 | 2 | 2 | 2 |
| 3 | 2 | 1 | 1 | 1 | 1 | 1 |
| 3 | 1 | 1 | 1 | 1 | 1 | 1 |
| 3 | 2 | 2 | 2 | 2 | 1 | 1 |
| 3 | 2 | 1 | 1 | 1 | 1 | 1 |
| 4 | 3 | 2 | 2 | 1 | 1 | 1 |
| 3 | 4 | 3 | 3 | 2 | 2 | 2 |

|   |   |   |   |   |   |   |
|---|---|---|---|---|---|---|
| 3 | 3 | 2 | 1 | 1 | 1 | 1 |
| 3 | 2 | 2 | 1 | 1 | 1 | 1 |
| 3 | 2 | 1 | 1 | 1 | 1 | 1 |
| 4 | 2 | 1 | 1 | 1 | 1 | 1 |
| 3 | 1 | 1 |   |   |   |   |

|   |   |   |   |   |   |
|---|---|---|---|---|---|
| 4 | 4 | 3 | 4 | 3 | 4 |
| 1 | 1 | 1 | 1 | 1 | 1 |
| 4 | 4 | 3 | 3 | 3 | 4 |
| 4 | 3 | 3 | 3 | 3 | 4 |
| 4 | 4 | 4 | 4 | 3 | 3 |
| 4 | 4 | 3 | 3 | 3 | 3 |
| 3 | 3 | 3 | 3 | 3 | 3 |
| 3 | 2 | 3 | 3 | 3 | 3 |
| 4 | 4 | 3 | 3 | 3 | 3 |
| 4 | 4 | 3 | 3 | 4 | 4 |
| 3 | 4 | 3 | 3 | 3 | 4 |
| 4 | 4 | 4 | 4 | 4 | 4 |
| 4 | 4 | 4 | 3 | 2 | 4 |
| 4 | 3 | 2 | 3 | 3 | 4 |
| 4 | 4 | 3 | 2 | 2 | 3 |
| 3 | 3 | 3 | 3 | 3 | 3 |
| 3 | 4 | 4 | 3 | 4 | 3 |
| 4 | 4 | 4 | 3 | 4 | 4 |
| 4 | 4 | 3 | 3 | 4 | 4 |
| 4 | 4 | 3 | 3 | 3 | 4 |
| 1 | 2 | 2 | 2 | 2 | 3 |
| 4 | 2 | 1 | 2 | 2 | 3 |

|   |   |   |   |   |   |   |
|---|---|---|---|---|---|---|
| 1 | 1 | 1 | 1 | 1 | 1 | 1 |
| 1 | 2 | 2 | 2 | 2 | 2 | 1 |
| 1 | 1 | 1 | 1 | 1 | 1 | 1 |
| 1 | 1 | 1 | 1 | 1 | 1 | 1 |
| 1 | 1 | 1 | 1 | 1 | 1 | 1 |
| 1 | 1 | 1 | 1 | 2 | 1 | 1 |
| 1 | 1 | 1 | 1 | 1 | 1 | 1 |
| 1 | 1 | 1 | 1 | 1 | 1 | 1 |
| 1 | 1 | 1 | 1 | 1 | 1 | 1 |
| 2 | 2 | 2 | 2 | 2 | 2 | 2 |
| 2 | 2 | 2 | 2 | 2 | 2 | 2 |
| 1 | 1 | 1 | 1 | 1 | 1 | 1 |
| 1 | 1 | 1 | 1 | 1 | 1 | 1 |
| 1 | 1 | 1 | 1 | 1 | 1 | 1 |

|   |   |   |   |   |   |   |   |
|---|---|---|---|---|---|---|---|
| 1 | 1 | 1 | 1 | 1 | 1 | 1 | 1 |
| 1 | 1 | 1 | 1 | 1 | 1 | 1 | 1 |
| 1 | 1 | 1 | 1 | 1 | 1 | 1 | 1 |
| 1 | 1 | 1 | 1 | 1 | 1 | 1 | 1 |
| 1 | 1 | 1 | 1 | 2 | 1 | 1 | 1 |
| 1 | 1 | 1 | 1 | 1 | 1 | 1 | 1 |
| 1 | 1 | 1 | 1 | 1 | 1 | 1 | 1 |
| 1 | 1 | 1 | 1 | 1 | 1 | 1 | 1 |

|   |   |   |   |   |   |   |
|---|---|---|---|---|---|---|
| 3 | 3 | 2 | 2 | 2 | 2 | 3 |
| 3 | 4 | 3 | 3 | 3 | 3 | 3 |
| 4 | 3 | 3 | 2 | 3 | 3 | 4 |
| 4 | 3 | 3 | 3 | 3 | 3 | 4 |
| 3 | 4 | 4 | 4 | 4 | 3 | 3 |
| 4 | 4 | 3 | 4 | 4 | 3 | 3 |
| 3 | 3 | 3 | 3 | 3 | 3 | 4 |
| 3 | 4 | 3 | 3 | 3 | 4 | 4 |
| 3 | 3 | 3 | 2 | 2 | 3 | 4 |
| 4 | 3 | 2 | 3 | 3 | 4 | 3 |
| 2 | 3 | 3 | 2 | 2 | 2 | 3 |
| 3 | 4 | 3 | 3 | 3 | 3 | 3 |
| 2 | 3 | 2 | 2 | 2 | 2 | 3 |
| 3 | 2 | 2 | 2 | 2 | 3 | 3 |
| 3 | 3 | 2 | 2 | 2 | 2 | 3 |
| 4 | 3 | 2 | 2 | 2 | 2 | 3 |
| 2 | 1 | 1 | 1 | 1 | 1 | 2 |
| 4 | 1 | 1 | 2 | 2 | 2 | 3 |

|   |   |   |   |   |   |   |
|---|---|---|---|---|---|---|
| 3 | 3 | 3 | 3 | 3 | 3 | 3 |
| 3 | 4 | 4 | 4 | 4 | 3 | 4 |
| 3 | 4 | 3 | 3 | 3 | 3 | 4 |
| 4 | 4 | 4 | 4 | 4 | 3 | 4 |
| 4 | 4 | 3 | 4 | 4 | 3 | 4 |
| 3 | 4 | 4 | 4 | 4 | 4 | 4 |
| 4 | 3 | 4 | 4 | 4 | 4 | 3 |
| 4 | 2 | 4 | 4 | 4 | 4 | 4 |
| 4 | 4 | 4 | 4 | 4 | 3 | 3 |
| 4 | 3 | 3 | 3 | 3 | 3 | 3 |
| 4 | 4 | 4 | 4 | 4 | 4 | 4 |

|   |   |   |   |   |   |
|---|---|---|---|---|---|
| 3 | 3 | 3 | 3 | 3 | 4 |
| 4 | 4 | 4 | 4 | 3 | 4 |
| 4 | 3 | 3 | 4 | 3 | 4 |
| 3 | 4 | 3 | 3 | 3 | 3 |
| 3 | 4 | 4 | 4 | 3 | 3 |
| 4 | 2 | 4 | 3 | 3 | 2 |
| 2 | 4 | 3 | 3 | 3 | 3 |
| 2 | 4 | 3 | 2 | 3 | 4 |
| 4 | 4 | 4 | 4 | 3 | 4 |
| 1 | 2 | 2 | 2 | 2 | 3 |
| 3 | 2 | 2 | 2 | 2 | 4 |

|   |   |   |   |   |   |
|---|---|---|---|---|---|
| 1 | 2 | 1 | 1 | 1 | 2 |
| 3 | 2 | 2 | 2 | 2 | 3 |
| 2 | 2 | 1 | 2 | 2 | 3 |
| 3 | 2 | 2 | 2 | 2 | 3 |
| 3 | 3 | 3 | 3 | 3 | 2 |
| 2 | 2 | 2 | 2 | 2 | 3 |
| 3 | 2 | 2 | 3 | 2 | 3 |
| 3 | 2 | 2 | 2 | 2 | 3 |
| 2 | 3 | 2 | 2 | 2 | 3 |
| 2 | 2 | 2 | 2 | 2 | 3 |
| 3 | 3 | 3 | 3 | 3 | 4 |
| 2 | 2 | 2 | 2 | 2 | 3 |
| 3 | 2 | 2 | 2 | 2 | 3 |
| 3 | 2 | 2 | 2 | 2 | 3 |
| 2 | 2 | 1 | 1 | 1 | 2 |
| 3 | 3 | 2 | 2 | 2 | 3 |
| 3 | 4 | 3 | 2 | 2 | 2 |
| 2 | 1 | 1 | 1 | 1 | 2 |
| 1 | 2 | 1 | 1 | 2 | 3 |
| 2 | 2 | 1 | 1 | 1 | 2 |
| 1 | 1 | 1 | 1 | 1 | 2 |
| 3 | 1 | 1 | 1 | 2 | 3 |

|   |   |   |   |   |   |
|---|---|---|---|---|---|
| 1 | 1 | 1 | 1 | 1 | 1 |
| 2 | 2 | 2 | 2 | 2 | 2 |
| 1 | 2 | 1 | 1 | 1 | 2 |
| 2 | 2 | 1 | 2 | 1 | 3 |
| 2 | 3 | 2 | 2 | 1 | 3 |
| 2 | 2 | 2 | 2 | 2 | 2 |
| 3 | 2 | 2 | 2 | 1 | 3 |
| 3 | 1 | 1 | 1 | 1 | 3 |

|   |   |   |   |   |   |   |
|---|---|---|---|---|---|---|
| 2 | 3 | 2 | 2 | 2 | 2 | 2 |
| 2 | 2 | 2 | 2 | 2 | 2 | 3 |
| 2 | 2 | 2 | 2 | 2 | 2 | 3 |
| 1 | 2 | 1 | 1 | 1 | 1 | 2 |
| 2 | 2 | 1 | 2 | 2 | 1 | 2 |
| 2 | 2 | 2 | 2 | 2 | 2 | 2 |
| 2 | 3 | 1 | 1 | 1 | 1 | 2 |
| 2 | 3 | 2 | 2 | 2 | 2 | 2 |
| 2 | 2 | 3 | 2 | 2 | 2 | 1 |
| 1 | 1 | 1 | 1 | 1 | 1 | 1 |
| 1 | 2 | 2 | 2 | 2 | 1 | 2 |
| 2 | 2 | 1 | 1 | 1 | 1 | 2 |
| 1 | 2 | 1 | 1 | 1 | 1 | 2 |
| 1 | 1 | 1 | 1 | 1 | 1 | 2 |
