# Supplementary material
Source: PubMed Central journal article supplement (PMC3987808)
Supplement: NIHMS556674-supplement-Wagner_Sci_Sig_Suppl_Tables_S1-S3.pdf [file NIHMS556674-supplement-Wagner_Sci_Sig_Suppl_Tables_S1-S3.pdf]

**Table S1.** List of shRNAs, target sequences, and protein-level knockdown efficiencies. TRC is an abbreviation for The RNAi Consortium, based at the Broad Institute.

| Gene Symbol | Internal shRNA ID | TRC ID         | TRC Library Clone Name | Target Sequence       | Target Region | Percent Protein Remaining (Mean) | Percent Protein Remaining (Stdev of 2) |
|-------------|-------------------|----------------|------------------------|-----------------------|---------------|----------------------------------|----------------------------------------|
| AKT1        | AKT1_sh1          | TRCN0000039794 | NM_005163.1-735s1c1    | GATCCTCAAGAAGGAAGTCAT | CDS           | 29.1%                            | 12.0%                                  |
| AKT1        | AKT1_sh4          | TRCN0000039797 | NM_005163.1-628s1c1    | CGCGTGACCATGAACGAGTTT | CDS           | 57.0%                            | 15.7%                                  |
| AKT2        | AKT2_sh10         | TRCN0000000565 | NM_001626.x-632s1c1    | ACGGGCTAAAGTGACCATGAA | CDS           | 23.9%                            | 7.3%                                   |
| AKT2        | AKT2_sh12         | TRCN0000009819 | NM_001626.x-203s1c1    | CATGAATGAGGTGTCTGTCAT | 5'-UTR        | 38.9%                            | 12.9%                                  |
| AKT3        | AKT3_sh7          | TRCN0000039889 | NM_005465.3-1024s1c1   | CCAGAGGTGTTAGAAGATAAT | CDS           | 19.5%                            | 1.1%                                   |
| AKT3        | AKT3_sh9          | TRCN0000039891 | NM_005465.3-671s1c1    | GCAGAGTATTAAGAACAATA  | CDS           | 23.7%                            | 8.2%                                   |
| BCAR1       | P130CAS_sh3       | TRCN0000115984 | NM_014567.2-2223s1c1   | GCTGAAGCAGTTGAACGACT  | CDS           | 35.6%                            | 6.2%                                   |
| BCAR1       | P130CAS_sh5       | TRCN0000115986 | NM_014567.2-1332s1c1   | CGTGGTCGACAGTGGTGTGTA | CDS           | 52.0%                            | 7.6%                                   |
| CAMK2D      | CAMK2D_sh9        | TRCN0000196967 | NM_001221.2-1917s1c1   | GTCACCAACAGTACCCATCAA | CDS           | 24.9%                            | 2.8%                                   |
| CAMK2D      | CAMK2D_sh4        | TRCN0000000474 | NM_001221.x-1475s1c1   | CAGATGGAGTAAAGGAGTCAA | CDS           | 31.6%                            | 5.8%                                   |
| CAMKK2      | CAMKK2D_sh9       | TRCN0000195473 | NM_153499.2-5368s1c1   | CCCATGCTTCTGTTTCATTC  | 3'-UTR        | 27.0%                            | 10.4%                                  |
| CAMKK2      | CAMKK2D_sh7       | TRCN0000196992 | NM_153499.2-4867s1c1   | GCAAAGAGGACGCCATAATT  | 3'-UTR        | 32.0%                            | 7.9%                                   |
| GRB2        | GRB_sh3           | TRCN0000029371 | NM_002086.3-492s1c1    | CGGCTTCATCCCAAGAACTA  | CDS           | 17.4%                            | 8.7%                                   |
| GRB2        | GRB_sh4           | TRCN0000029372 | NM_002086.3-764s1c1    | GATCTACATCTGTCTCCAGAA | CDS           | 56.9%                            | 10.2%                                  |
| GSK3A       | GSK3-A_sh3        | TRCN0000038681 | NM_019884.1-1171s1c1   | GAGTTCAAGTCCCTCAGATT  | CDS           | 6.1%                             | 1.1%                                   |
| GSK3A       | GSK3-A_sh4        | TRCN0000038682 | NM_019884.1-1173s1c1   | GTTCAAGTCCCTCAGATTAA  | CDS           | 6.6%                             | 1.6%                                   |
| GSK3B       | GSK3-B_sh7        | TRCN0000040001 | NM_002093.2-974s1c1    | GCTGAGCTGTTACTAGGACAA | CDS           | 12.7%                            | 6.4%                                   |
| GSK3B       | GSK3-B_sh12       | TRCN0000039565 | NM_002093.2-1067s1c1   | AGCAAATCAGAGAAATGAAC  | CDS           | 13.7%                            | 5.2%                                   |

|        |             |                |                      |                        |        |       |      |
|--------|-------------|----------------|----------------------|------------------------|--------|-------|------|
| HRAS   | HRAS_sh9    | TRCN0000040088 | NM_005343.1-108s1c1  | AGAGGATTCTACCGGAAGCA   | CDS    | 41.8% | 8.0% |
| HRAS   | HRAS_sh12   | TRCN0000010358 | NM_005343.x-108s1c1  | AGAGGATTCTACCGGAAGCA   | CDS    | 82.2% | 9.8% |
| KRAS   | KRAS_sh3    | TRCN0000040150 | NM_004985.3-570s1c1  | CTCAGGACTTAGCAAGAAGTT  | CDS    | 27.6% | 6.8% |
| KRAS   | KRAS_sh5    | TRCN0000040152 | NM_004985.3-492s1c1  | AGGACTCTGAAGATGTACCTA  | CDS    | 28.7% | 1.7% |
| MAP2K1 | MAP2K1_sh1  | TRCN0000002329 | NM_002755.x-455s1c1  | GCTTCTATGGTGC GTTCTACA | CDS    | 40.1% | 4.6% |
| MAP2K1 | MAP2K1_sh4  | TRCN0000002330 | NM_002755.x-1163s1c1 | CTGATGCTGAGGAAGTGGATT  | CDS    | 57.2% | 5.6% |
| MAP2K2 | MAP2K2_sh4  | TRCN0000007008 | NM_030662.2-1218s1c1 | CTGGACTATATTGTGAACGAG  | CDS    | 41.1% | 3.9% |
| MAP2K2 | MAP2K2_sh5  | TRCN0000195037 | NM_030662.2-1277s1c1 | CTTCCAGGAGTTTGTCAATAA  | CDS    | 43.2% | 2.5% |
| MAPK1  | MAPK1_sh2   | TRCN0000010040 | NM_138957.x-381s1c1  | CAAAGTTCGAGTAGCTATCAA  | CDS    | 8.2%  | 5.8% |
| MAPK1  | MAPK1_sh5   | TRCN0000010050 | NM_138957.x-657s1c1  | TATCCATTGAGCTAACGTTCT  | CDS    | 12.4% | 3.4% |
| MAPK3  | MAPK3_sh1   | TRCN0000006150 | NM_002746.1-876s1c1  | CCTGAATTGTATCATCAACAT  | CDS    | 1.7%  | 1.6% |
| MAPK3  | MAPK3_sh4   | TRCN0000010998 | NM_002746.1-480s1c1  | GCAGCTGAGCAATGACCATAT  | CDS    | 6.8%  | 2.6% |
| PAK1   | PAK1_sh8    | TRCN0000199394 | NM_002576.3-1655s1c1 | CCAGAGGTTGTGACACGAAAG  | CDS    | 4.1%  | 0.7% |
| PAK1   | PAK1_sh7    | TRCN0000195500 | NM_002576.3-456s1c1  | CCCTAAACCATGGTTCTAAAC  | CDS    | 8.3%  | 1.9% |
| PDPK1  | PDPK1_sh4d  | TRCN0000196933 | NM_002613.3-676s1c1  | GATGAGACCTGTACCCGATTT  | CDS    | 5.4%  | 1.7% |
| PDPK1  | PDPK1_sh10  | TRCN0000039782 | NM_002613.1-1553s1c1 | CAAAGTTCTGAAAGGTGAAAT  | CDS    | 7.3%  | 1.1% |
| PIK3CA | PIK3CA_sh6  | TRCN0000010406 | NM_006218.x-79s1c1   | GAATGTTTACTACCAAATGGA  | CDS    | 4.6%  | 1.0% |
| PIK3CA | PIK3CA_sh5  | TRCN0000039603 | NM_006218.1-3251s1c1 | GATTCACACTGCACTGTAA    | 3'-UTR | 13.6% | 8.1% |
| PIK3CB | PIK3CB_sh3  | TRCN0000194877 | NM_006219.1-2802s1c1 | CCACATTGACTTTGGACATAT  | CDS    | 10.7% | 3.7% |
| PIK3CB | PIK3CB_sh16 | TRCN0000009860 | NM_006219.x-2586s1c1 | CATTGAGCTGAACAGTAGCAA  | CDS    | 13.9% | 0.4% |
| PLCG1  | PLCG1_sh3   | TRCN0000006979 | NM_002660.2-3562s1c1 | CCAGATCAGTAACCTGAATT   | CDS    | 13.3% | 2.8% |

|        |            |                |                      |                        |        |        |        |
|--------|------------|----------------|----------------------|------------------------|--------|--------|--------|
| PLCG1  | PLCG1_sh2  | TRCN0000006978 | NM_002660.2-335s1c1  | GCCATTGACATTCTGTGAAATT | CDS    | 21.5%  | 2.9%   |
| PPP1CA | PPP1CA_sh4 | TRCN0000002454 | NM_002708.x-1030s1c1 | CCGCAATTCGCCAAAGCCAA   | CDS    | 291.2% | 109.9% |
| PPP1CA | PPP1CA_sh5 | TRCN0000002452 | NM_002708.x-1082s1c1 | AGATGATGGATTGATTGTACA  | 3'-UTR | 376.9% | 152.4% |
| PPP2CA | PPP2CA_sh4 | TRCN0000002483 | NM_002715.x-1036s1c1 | TGGAACTTGACGATACTCTAA  | CDS    | 36.9%  | 2.6%   |
| PPP2CA | PPP2CA_sh5 | TRCN0000002486 | NM_002715.x-1684s1c1 | CCCATGTTGTTCTTTGTTATT  | 3'-UTR | 37.6%  | 6.3%   |
| PRKCA  | PKC-A_sh3  | TRCN0000001692 | NM_002737.x-921s1c1  | CATGGAAGCTCAGGCAGAAATT | CDS    | 20.1%  | 9.3%   |
| PRKCA  | PKC-A_sh8  | TRCN0000196909 | NM_002737.2-1280s1c1 | GCTGTACTTCGTCATGGAATA  | CDS    | 20.4%  | 1.6%   |
| PRKCB1 | PKC-B_sh5  | TRCN0000195381 | NM_002738.5-745s1c1  | CCTGTGAGATCCCTACGTAAA  | CDS    | 27.1%  | 7.5%   |
| PRKCB1 | PKC-B_sh2  | TRCN0000003117 | NM_002738.x-847s1c1  | GCTGAAAGAATCGGACAAAGA  | CDS    | 27.6%  | 1.9%   |
| PRKCD  | PKC-D_sh6  | TRCN0000010193 | NM_006254.x-1385s1c1 | GGCCGCTTTGAACTCTACCGT  | CDS    | 14.5%  | 18.2%  |
| PRKCD  | PKC-D_sh8  | TRCN0000010203 | NM_006254.x-826s1c1  | GCAGGGATTAAAGTGTGAAGA  | CDS    | 27.3%  | 12.7%  |
| PRKCE  | PKC-E_sh1  | TRCN0000000844 | NM_005400.x-1288s1c1 | GCAGAACTCAAGGGCAAAGAT  | CDS    | 26.4%  | 7.4%   |
| PRKCE  | PKC-E_sh5  | TRCN0000000847 | NM_005400.x-591s1c1  | TGTCATAGGAAAGCAGGGATA  | CDS    | 17.7%  | 3.3%   |
| PTEN   | PTEN_sh4   | TRCN0000002748 | NM_000314.x-1956s1c1 | CGTGCAGATAATGACAAGGAA  | CDS    | 8.9%   | 2.8%   |
| PTEN   | PTEN_sh1   | TRCN0000002746 | NM_000314.x-1320s1c1 | CCACAGCTAGAACTTATCAAA  | CDS    | 22.8%  | 10.1%  |
| PTK2   | FAK_sh16   | TRCN0000121319 | NM_005607.3-1043s1c1 | GCCCAGAAGAAGGAATCAGTT  | CDS    | 6.4%   | 1.4%   |
| PTK2   | FAK_sh21   | TRCN0000196310 | NM_005607.3-817s1c1  | GATGTTGGTTTAAAGCGATT   | CDS    | 6.7%   | 5.7%   |
| PTPN1  | PTPN1_sh1  | TRCN0000002779 | NM_002827.x-400s1c1  | GAAGCCCAAAGGAGTTACATT  | CDS    | 13.6%  | 4.6%   |
| PTPN1  | PTPN1_sh5  | TRCN0000002777 | NM_002827.x-3232s1c1 | GCTGCTCTGCTATATGCCTTA  | 3'-UTR | 35.0%  | 5.2%   |
| PTPN11 | PTPN11_sh4 | TRCN0000005003 | NM_002834.3-1570s1c1 | CGCTAAGAGAACTTAAACTTT  | CDS    | 10.8%  | 3.1%   |
| PTPN11 | PTPN11_sh1 | TRCN0000005002 | NM_002834.3-2452s1c1 | GCAGTTAAATTGTGCGCTGTA  | 3'-UTR | 28.4%  | 10.6%  |

|         |             |                 |                      |                       |        |       |       |
|---------|-------------|-----------------|----------------------|-----------------------|--------|-------|-------|
| PTPN6   | PTPN6_sh3   | TRCN0000006887  | NM_002831.3-1572s1c1 | CGACATGCTCATGGAGAACAT | CDS    | 10.5% | 2.0%  |
| PTPN6   | PTPN6_sh2   | TRCN0000006886  | NM_002831.3-1326s1c1 | GCATGACACAACCGAATACAA | CDS    | 16.4% | 5.3%  |
| RAF-A   | A-RAF_sh1   | TRCN0000000571  | NM_001654.x-390s1c1  | GACTCATCAAGGGACGAAAGA | CDS    | 19.7% | 8.2%  |
| RAF-A   | A-RAF_sh4   | TRCN0000000568  | NM_001654.x-939s1c1  | GTAGAGGAGGTAGTGATGGAA | CDS    | 22.5% | 6.8%  |
| RAF-B   | B-RAF_sh1   | TRCN0000006292  | NM_004333.2-1538s1c1 | CAGCAGTTACAAGCCTTCAAA | CDS    | 22.6% | 3.8%  |
| RAF-B   | B-RAF_sh4   | TRCN0000006291  | NM_004333.2-2267s1c1 | GCTGGTTTCAAACAGAGGAT  | CDS    | 25.0% | 7.4%  |
| RAF-C   | C-RAF_sh5   | TRCN0000001068  | NM_002880.x-1529s1c1 | GAGACATGAAATCCAACAATA | CDS    | 16.8% | 4.8%  |
| RAF-C   | C-RAF_sh3   | TRCN0000001066  | NM_002880.x-1236s1c1 | CGGAGATGTTGCAGTAAAGAT | CDS    | 28.3% | 11.3% |
| ROCK2   | ROCK2_4     | TRCN0000000980  | NM_004850.x-4337s1c1 | CGTTGCCATATTAAGTGTCAT | CDS    | 19.3% | 11.5% |
| ROCK2   | ROCK2_6     | TRCN0000194836  | NM_004850.3-5578s1c1 | CCTTGATGTCTGTCTATTATT | 3'-UTR | 30.8% | 4.7%  |
| RPS6KA1 | p90RSK_sh4  | TRCN0000001385  | NM_002953.x-564s1c1  | GCTCTATCTCATTCTGGACTT | CDS    | 16.2% | 4.5%  |
| RPS6KA1 | p90RSK_sh1  | TRCN0000001384  | NM_002953.x-2576s1c1 | AGCGATTCACTGTATAAACTT | 3'-UTR | 23.4% | 11.9% |
| SHC1    | SHC1_52_sh2 | TRCN00000040209 | NM_003029.3-555s1c1  | CCACATGCAATCTATCTCATT | CDS    | 60.5% | 14.6% |
| SHC1    | SHC1_52_sh3 | TRCN00000040210 | NM_003029.3-198s1c1  | CCACGGGAGCTTTGTCAATAA | CDS    | 74.2% | 2.7%  |
| SRC     | SRC_sh1     | TRCN00000038150 | NM_198291.1-648s1c1  | GACAGACCTGCCTTCAAGAA  | CDS    | 5.9%  | 1.7%  |
| SRC     | SRC_sh2     | TRCN00000038153 | NM_198291.1-675s1c1  | GCGGCTCCAGATTGTCAACAA | CDS    | 19.6% | 3.0%  |

**Table S2.** List of shRNA pool components. To produce pools of shRNA expression vectors, equal volumes of titer-normalized viral stocks of component shRNAs were mixed. The total viral titer of each shRNA pool thus matched the viral titer of the component shRNAs.

| shRNA Pools Targeting Kinases | Component shRNAs | shRNA Pools Targeting Phosphatases | Component shRNAs |            |
|-------------------------------|------------------|------------------------------------|------------------|------------|
| AKT pool:                     | AKT1_sh1         | PPCA pool:                         | PPP1CA_sh4       |            |
|                               | AKT2_sh10        |                                    | PPP2CA_sh5       |            |
|                               | AKT3_sh7         | PTPN pool:                         | PTPN1_sh1        |            |
| Cytoskeleton pool:            | FAK_sh21         |                                    | PTPN11_sh1       |            |
|                               | P130CAS_sh5      |                                    | PTPN6_sh3        |            |
| GSK3 pool:                    | GSK3-A_sh3       | All phosphatases pool:             | PPP1CA_sh4       |            |
|                               | GSK3-B_sh12      |                                    | PPP2CA_sh5       |            |
| MAP2K pool:                   | MAP2K1_sh1       |                                    |                  | PTPN1_sh1  |
|                               | MAP2K2_sh4       |                                    |                  | PTPN11_sh1 |
| MAPK pool:                    | MAPK1_sh2        |                                    | PTPN6_sh3        |            |
|                               | MAPK3_sh4        |                                    | PTEN_sh4         |            |
| PI3K pool:                    | PIK3CA_sh6       |                                    |                  |            |
|                               | PIK3CB_sh3       |                                    |                  |            |
| PKC pool:                     | PKC-A_sh8        |                                    |                  |            |
|                               | PKC-B_sh5        |                                    |                  |            |
|                               | PKC-D_sh6        |                                    |                  |            |
|                               | PKC-E_sh5        |                                    |                  |            |
| RAF pool:                     | A-RAF_sh4        |                                    |                  |            |
|                               | B-RAF_sh1        |                                    |                  |            |
|                               | C-RAF_sh5        |                                    |                  |            |
| RAS pool:                     | HRAS_sh9         |                                    |                  |            |
|                               | KRAS_sh5         |                                    |                  |            |

**Table S3.** List of antibodies used with vendor information.

| <b>Primary Antibodies</b>   |                                                                                               |                             |                       |
|-----------------------------|-----------------------------------------------------------------------------------------------|-----------------------------|-----------------------|
| <b>Target Protein</b>       | <b>Phosphorylation Site</b>                                                                   | <b>Supplier</b>             | <b>Catalog Number</b> |
| Akt1/2/3                    | Ser <sup>473</sup>                                                                            | Cell Signaling Technologies | CST4058               |
| Calmodulin                  | Ser <sup>81</sup>                                                                             | Santa Cruz                  | sc17019R              |
| c-Cbl                       | Tyr <sup>774</sup>                                                                            | Cell Signaling Technologies | CST3555               |
| c-Jun                       | Ser <sup>63</sup>                                                                             | Cell Signaling Technologies | CST9261               |
| CREB                        | Ser <sup>133</sup>                                                                            | Cell Signaling Technologies | CST9198               |
| EGFR                        | Tyr <sup>845</sup>                                                                            | Cell Signaling Technologies | CST2231               |
| ERK1/2                      | (1: Thr <sup>202</sup> , Tyr <sup>204</sup> ) / (2: Thr <sup>185</sup> , Tyr <sup>187</sup> ) | Cell Signaling Technologies | CST4377               |
| FGFR1                       | Tyr <sup>653</sup> , Tyr <sup>654</sup>                                                       | Cell Signaling Technologies | CST3471               |
| GSK-3 $\alpha$ / $\beta$    | ( $\alpha$ : Ser <sup>21</sup> ) / ( $\beta$ : Ser <sup>9</sup> )                             | Cell Signaling Technologies | CST9327               |
| IGF-1R                      | Tyr <sup>1135</sup> , Tyr <sup>1136</sup>                                                     | Cell Signaling Technologies | CST3024               |
| MEK1/2                      | Ser <sup>217</sup> /Ser <sup>221</sup>                                                        | Cell Signaling Technologies | CST9154               |
| MARCKS                      | Ser <sup>152</sup> , Ser <sup>156</sup>                                                       | Cell Signaling Technologies | CST2741               |
| c-Met                       | Tyr <sup>1349</sup>                                                                           | Cell Signaling Technologies | CST3133               |
| NF- $\kappa$ B              | Ser <sup>536</sup>                                                                            | Cell Signaling Technologies | CST3033               |
| NTRK2                       | Tyr <sup>706</sup> , Tyr <sup>707</sup>                                                       | Cell Signaling Technologies | CST4621               |
| p90RSK                      | Ser <sup>380</sup>                                                                            | Cell Signaling Technologies | CST9341               |
| Paxillin                    | Tyr <sup>118</sup>                                                                            | Cell Signaling Technologies | CST2541               |
| PDGFR $\beta$               | Tyr <sup>771</sup>                                                                            | Cell Signaling Technologies | CST3173               |
| PKC $\beta$                 | Ser <sup>660</sup>                                                                            | Cell Signaling Technologies | CST9371               |
| PKC $\delta$                | Ser <sup>643</sup>                                                                            | Cell Signaling Technologies | CST9376               |
| c-Raf                       | Ser <sup>289</sup> , Ser <sup>296</sup> , Ser <sup>301</sup>                                  | Cell Signaling Technologies | CST9431               |
| Ribosomal Protein S6        | Ser <sup>235</sup> , Ser <sup>236</sup>                                                       | Cell Signaling Technologies | CST2211               |
| Ribosomal Protein S6        | Ser <sup>240</sup> , Ser <sup>244</sup>                                                       | Cell Signaling Technologies | CST2215               |
| RSK3                        | Thr <sup>356</sup> , Ser <sup>360</sup>                                                       | Cell Signaling Technologies | CST9348               |
| Shc                         | Tyr <sup>317</sup>                                                                            | Cell Signaling Technologies | CST2431               |
| STAT1                       | Tyr <sup>701</sup>                                                                            | Cell Signaling Technologies | CST9167               |
| STAT3                       | Tyr <sup>705</sup>                                                                            | Cell Signaling Technologies | CST9145               |
| $\beta$ -Actin              | Not Applicable, Loading Control                                                               | Sigma                       | A1978                 |
| <b>Secondary Antibodies</b> |                                                                                               |                             |                       |
| <b>Target Protein</b>       | <b>Emission Wavelength</b>                                                                    | <b>Supplier</b>             | <b>Catalog Number</b> |
| IRDye Goat anti-Mouse       | 800 nm                                                                                        | LI-COR                      | 926-32210             |
| IRDye Goat anti-Rabbit      | 680 nm                                                                                        | LI-COR                      | 926-32221             |
