# Supplementary material
Source: PubMed Central journal article supplement (PMC3987808)
Supplement: NIHMS556674-supplement-Wanger_Sci_Sig_Suppl_Table_S4.pdf [file NIHMS556674-supplement-Wanger_Sci_Sig_Suppl_Table_S4.pdf]

| Time post-GF  | 0      | 1     | 2     | 4     | 8     |
|---------------|--------|-------|-------|-------|-------|
| PDPK1 sh4d    |        |       |       |       |       |
| PDGFRb Y771   | 0.326  | 0.297 | 0.295 | 0.295 | 0.317 |
|               | 0.323  | 0.299 | 0.305 | 0.302 | 0.315 |
|               | 0.323  | 0.293 | 0.299 | 0.3   | 0.288 |
|               | 0.319  | 0.306 | 0.297 | 0.299 | 0.284 |
| SHC Y317      | 0.444  | 0.466 | 0.486 | 0.518 | 0.528 |
|               | 0.43   | 0.488 | 0.481 | 0.513 | 0.523 |
|               | 0.415  | 0.463 | 0.472 | 0.511 | 0.509 |
|               | 0.403  | 0.492 | 0.484 | 0.537 | 0.496 |
| c-Cbl Y774    | 0.41   | 0.368 | 0.396 | 0.39  | 0.405 |
|               | 0.4077 | 0.411 | 0.409 | 0.373 | 0.395 |
|               | 0.407  | 0.409 | 0.392 | 0.411 | 0.402 |
|               | 0.406  | 0.414 | 0.392 | 0.409 | 0.398 |
| Paxillin Y118 | 0.747  | 0.687 | 0.716 | 0.703 | 0.696 |
|               | 0.773  | 0.714 | 0.746 | 0.671 | 0.706 |
|               | 0.763  | 0.73  | 0.747 | 0.754 | 0.725 |
|               | 0.798  | 0.731 | 0.775 | 0.751 | 0.714 |
| AKT S473      | 0.292  | 0.264 | 0.305 | 0.225 | 0.398 |
|               | 0.295  | 0.313 | 0.328 | 0.25  | 0.23  |
|               | 0.2887 | 0.258 | 0.324 | 0.33  | 0.358 |
|               | 0.279  | 0.33  | 0.306 | 0.376 | 0.344 |
| GSK-3a/b S21  | 0.242  | 0.213 | 0.217 | 0.274 | 0.321 |
|               | 0.25   | 0.27  | 0.261 | 0.222 | 0.373 |
|               | 0.272  | 0.226 | 0.245 | 0.287 | 0.246 |
|               | 0.275  | 0.252 | 0.261 | 0.301 | 0.231 |
| RPS6 S235/S2  | 0.089  | 0.07  | 0.07  | 0.085 | 0.183 |
|               | 0.07   | 0.075 | 0.072 | 0.089 | 0.182 |
|               | 0.097  | 0.079 | 0.088 | 0.096 | 0.169 |
|               | 0.071  | 0.086 | 0.086 | 0.095 | 0.168 |
| RPS6 S240/S2  | 0.083  | 0.067 | 0.071 | 0.085 | 0.107 |
|               | 0.068  | 0.061 | 0.076 | 0.093 | 0.108 |
|               | 0.08   | 0.064 | 0.084 | 0.103 | 0.117 |
|               | 0.06   | 0.069 | 0.089 | 0.102 | 0.117 |
| PKCb S660     | 0.569  | 0.562 | 0.566 | 0.77  | 1.011 |
|               | 0.575  | 0.579 | 0.573 | 0.765 | 0.999 |
|               | 0.569  | 0.559 | 0.556 | 0.776 | 0.919 |
|               | 0.563  | 0.57  | 0.555 | 0.782 | 0.941 |
| PKCd S643     | 0.69   | 0.635 | 0.636 | 0.654 | 0.652 |

|              |        |       |       |       |       |
|--------------|--------|-------|-------|-------|-------|
|              | 0.662  | 0.666 | 0.655 | 0.646 | 0.655 |
|              | 0.645  | 0.642 | 0.628 | 0.632 | 0.606 |
|              | 0.642  | 0.632 | 0.614 | 0.639 | 0.618 |
| MARCKs S512, | 0.617  | 0.594 | 0.648 | 0.566 | 0.621 |
|              | 0.59   | 0.667 | 0.707 | 0.569 | 0.603 |
|              | 0.637  | 0.628 | 0.62  | 0.635 | 0.61  |
|              | 0.659  | 0.659 | 0.616 | 0.687 | 0.601 |
| CAMI S81     | 0.745  | 0.645 | 0.678 | 0.674 | 0.739 |
|              | 0.683  | 0.704 | 0.733 | 0.662 | 0.717 |
|              | 0.632  | 0.637 | 0.646 | 0.695 | 0.667 |
|              | 0.66   | 0.685 | 0.637 | 0.664 | 0.639 |
| RSK3 T356/S3 | 0.549  | 0.546 | 0.579 | 0.638 | 0.73  |
|              | 0.558  | 0.552 | 0.587 | 0.585 | 0.74  |
|              | 0.566  | 0.562 | 0.557 | 0.626 | 0.688 |
|              | 0.564  | 0.571 | 0.569 | 0.669 | 0.677 |
| RAF S289/S29 | 0.179  | 0.165 | 0.167 | 0.176 | 0.184 |
|              | 0.185  | 0.172 | 0.166 | 0.164 | 0.183 |
|              | 0.171  | 0.168 | 0.163 | 0.178 | 0.179 |
|              | 0.17   | 0.172 | 0.166 | 0.182 | 0.177 |
| MEK S217/S2  | 0.178  | 0.187 | 0.247 | 0.691 | 0.838 |
|              | 0.186  | 0.192 | 0.255 | 0.679 | 0.842 |
|              | 0.1813 | 0.171 | 0.237 | 0.65  | 0.826 |
|              | 0.18   | 0.184 | 0.246 | 0.831 | 0.767 |
| ERK T202/Y20 | 0.441  | 0.372 | 0.485 | 0.812 | 1.076 |
|              | 0.381  | 0.374 | 0.482 | 0.827 | 1.142 |
|              | 0.417  | 0.383 | 0.446 | 0.914 | 1.021 |
|              | 0.4    | 0.387 | 0.44  | 0.925 | 0.954 |
| p90RSK S380  | 0.536  | 0.242 | 0.215 | 0.245 | 0.367 |
|              | 0.559  | 0.226 | 0.233 | 0.26  | 0.372 |
|              | 0.638  | 0.221 | 0.215 | 0.176 | 0.34  |
|              | 0.53   | 0.223 | 0.201 | 0.192 | 0.378 |
| STAT1 Y701   | 0.41   | 0.409 | 0.403 | 0.419 | 0.442 |
|              | 0.399  | 0.417 | 0.412 | 0.413 | 0.452 |
|              | 0.388  | 0.403 | 0.4   | 0.426 | 0.415 |
|              | 0.376  | 0.411 | 0.402 | 0.433 | 0.425 |
| STAT3 Y705   | 0.555  | 0.547 | 0.559 | 0.572 | 0.575 |
|              | 0.558  | 0.592 | 0.569 | 0.562 | 0.583 |
|              | 0.547  | 0.532 | 0.548 | 0.553 | 0.553 |
|              | 0.528  | 0.574 | 0.562 | 0.586 | 0.564 |

|               |            |       |        |       |       |
|---------------|------------|-------|--------|-------|-------|
| CREB S133     | 0.613      | 0.569 | 0.612  | 0.726 | 0.903 |
|               | 0.598      | 0.669 | 0.668  | 0.747 | 0.895 |
|               | 0.527      | 0.566 | 0.588  | 0.694 | 0.78  |
|               | 0.528      | 0.62  | 0.581  | 0.739 | 0.771 |
| NF-kB S536    | 0.633      | 0.62  | 0.598  | 0.704 | 0.837 |
|               | 0.641      | 0.652 | 0.605  | 0.69  | 0.808 |
|               | 0.62       | 0.613 | 0.601  | 0.733 | 0.78  |
|               | 0.624      | 0.625 | 0.584  | 0.715 | 0.769 |
| c-Jun S63     | 0.049      | 0.052 | 0.043  | 0.045 | 0.054 |
|               | 0.05       | 0.051 | 0.05   | 0.041 | 0.066 |
|               | 0.061      | 0.056 | 0.053  | 0.061 | 0.07  |
|               | 0.056      | 0.061 | 0.057  | 0.06  | 0.069 |
| PDGFRb Y771   | PDPK1 sh10 |       |        |       |       |
|               | 0.319      | 0.305 | 0.308  | 0.309 | 0.313 |
|               | 0.32       | 0.31  | 0.312  | 0.309 | 0.327 |
|               | 0.33       | 0.32  | 0.314  | 0.321 | 0.31  |
|               | 0.323      | 0.322 | 0.319  | 0.327 | 0.308 |
| SHC Y317      | 0.437      | 0.468 | 0.504  | 0.541 | 0.522 |
|               | 0.449      | 0.494 | 0.509  | 0.544 | 0.536 |
|               | 0.444      | 0.487 | 0.491  | 0.551 | 0.521 |
|               | 0.388      | 0.49  | 0.5    | 0.565 | 0.542 |
| c-Cbl Y774    | 0.443      | 0.415 | 0.414  | 0.433 | 0.429 |
|               | 0.433      | 0.43  | 0.432  | 0.435 | 0.438 |
|               | 0.434      | 0.425 | 0.4177 | 0.424 | 0.411 |
|               | 0.4367     | 0.442 | 0.407  | 0.417 | 0.423 |
| Paxillin Y118 | 0.795      | 0.719 | 0.741  | 0.762 | 0.788 |
|               | 0.817      | 0.786 | 0.747  | 0.76  | 0.777 |
|               | 0.792      | 0.714 | 0.669  | 0.737 | 0.741 |
|               | 0.66       | 0.796 | 0.756  | 0.787 | 0.738 |
| AKT S473      | 0.373      | 0.294 | 0.269  | 0.37  | 0.45  |
|               | 0.304      | 0.313 | 0.311  | 0.382 | 0.447 |
|               | 0.366      | 0.303 | 0.308  | 0.372 | 0.382 |
|               | 0.3477     | 0.298 | 0.314  | 0.418 | 0.416 |
| GSK-3a/b S21  | 0.282      | 0.222 | 0.259  | 0.307 | 0.363 |
|               | 0.283      | 0.263 | 0.277  | 0.292 | 0.255 |
|               | 0.294      | 0.25  | 0.225  | 0.303 | 0.283 |
|               | 0.2863     | 0.263 | 0.281  | 0.327 | 0.335 |

|              |        |       |       |       |       |
|--------------|--------|-------|-------|-------|-------|
| RPS6 S235/S2 | 0.066  | 0.053 | 0.046 | 0.062 | 0.111 |
|              | 0.056  | 0.051 | 0.053 | 0.072 | 0.128 |
|              | 0.07   | 0.052 | 0.059 | 0.067 | 0.089 |
|              | 0.058  | 0.056 | 0.052 | 0.065 | 0.114 |
| RPS6 S240/S2 | 0.09   | 0.06  | 0.062 | 0.073 | 0.093 |
|              | 0.066  | 0.062 | 0.066 | 0.087 | 0.097 |
|              | 0.074  | 0.063 | 0.078 | 0.083 | 0.111 |
|              | 0.071  | 0.075 | 0.076 | 0.087 | 0.089 |
| PKCb S660    | 0.625  | 0.588 | 0.585 | 0.741 | 0.929 |
|              | 0.603  | 0.584 | 0.586 | 0.744 | 0.967 |
|              | 0.605  | 0.578 | 0.575 | 0.739 | 0.923 |
|              | 0.611  | 0.589 | 0.578 | 0.754 | 0.895 |
| PKCd S643    | 0.697  | 0.663 | 0.693 | 0.689 | 0.681 |
|              | 0.693  | 0.699 | 0.701 | 0.691 | 0.701 |
|              | 0.686  | 0.676 | 0.673 | 0.686 | 0.692 |
|              | 0.692  | 0.679 | 0.67  | 0.687 | 0.68  |
| MARCKs S512, | 0.689  | 0.717 | 0.658 | 0.634 | 0.612 |
|              | 0.721  | 0.745 | 0.676 | 0.637 | 0.623 |
|              | 0.698  | 0.728 | 0.643 | 0.647 | 0.665 |
|              | 0.7027 | 0.73  | 0.668 | 0.69  | 0.617 |
| CAMI S81     | 0.758  | 0.655 | 0.654 | 0.687 | 0.68  |
|              | 0.731  | 0.702 | 0.729 | 0.652 | 0.722 |
|              | 0.772  | 0.705 | 0.659 | 0.689 | 0.74  |
|              | 0.614  | 0.744 | 0.706 | 0.704 | 0.732 |
| RSK3 T356/S3 | 0.669  | 0.624 | 0.576 | 0.672 | 0.714 |
|              | 0.645  | 0.618 | 0.621 | 0.679 | 0.77  |
|              | 0.646  | 0.625 | 0.608 | 0.74  | 0.751 |
|              | 0.604  | 0.647 | 0.612 | 0.733 | 0.759 |
| RAF S289/S29 | 0.206  | 0.187 | 0.185 | 0.184 | 0.203 |
|              | 0.199  | 0.191 | 0.195 | 0.189 | 0.202 |
|              | 0.199  | 0.185 | 0.186 | 0.196 | 0.198 |
|              | 0.174  | 0.192 | 0.189 | 0.196 | 0.199 |
| MEK S217/S2: | 0.226  | 0.209 | 0.283 | 0.523 | 0.889 |
|              | 0.218  | 0.213 | 0.281 | 0.677 | 0.946 |
|              | 0.216  | 0.211 | 0.271 | 0.679 | 0.824 |
|              | 0.22   | 0.221 | 0.269 | 0.721 | 0.882 |
| ERK T202/Y20 | 0.526  | 0.449 | 0.533 | 0.892 | 1.121 |
|              | 0.485  | 0.46  | 0.533 | 0.935 | 1.228 |
|              | 0.486  | 0.451 | 0.489 | 0.843 | 1.037 |
|              | 0.42   | 0.442 | 0.486 | 0.93  | 1.12  |

|             |       |        |       |       |       |
|-------------|-------|--------|-------|-------|-------|
| p90RSK S380 | 0.402 | 0.254  | 0.237 | 0.25  | 0.386 |
|             | 0.485 | 0.234  | 0.239 | 0.255 | 0.392 |
|             | 0.504 | 0.25   | 0.266 | 0.246 | 0.436 |
|             | 0.51  | 0.207  | 0.245 | 0.252 | 0.427 |
| STAT1 Y701  | 0.418 | 0.4    | 0.414 | 0.42  | 0.437 |
|             | 0.418 | 0.435  | 0.41  | 0.443 | 0.47  |
|             | 0.396 | 0.412  | 0.386 | 0.442 | 0.42  |
|             | 0.358 | 0.434  | 0.412 | 0.439 | 0.452 |
| STAT3 Y705  | 0.633 | 0.606  | 0.595 | 0.599 | 0.599 |
|             | 0.648 | 0.629  | 0.595 | 0.604 | 0.618 |
|             | 0.628 | 0.612  | 0.586 | 0.593 | 0.602 |
|             | 0.599 | 0.625  | 0.588 | 0.6   | 0.604 |
| CREB S133   | 0.602 | 0.571  | 0.626 | 0.736 | 0.856 |
|             | 0.606 | 0.621  | 0.677 | 0.768 | 0.91  |
|             | 0.601 | 0.595  | 0.631 | 0.8   | 0.894 |
|             | 0.603 | 0.629  | 0.652 | 0.808 | 0.908 |
| NF-kB S536  | 0.624 | 0.61   | 0.635 | 0.72  | 0.766 |
|             | 0.617 | 0.617  | 0.657 | 0.713 | 0.752 |
|             | 0.6   | 0.6117 | 0.592 | 0.675 | 0.656 |
|             | 0.517 | 0.608  | 0.598 | 0.639 | 0.731 |
| c-Jun S63   | 0.051 | 0.048  | 0.041 | 0.049 | 0.046 |
|             | 0.043 | 0.042  | 0.052 | 0.052 | 0.058 |
|             | 0.049 | 0.041  | 0.046 | 0.046 | 0.079 |
|             | 0.03  | 0.056  | 0.047 | 0.048 | 0.056 |
| PIK3CA sh5  |       |        |       |       |       |
| PDGFRb Y771 | 0.311 | 0.318  | 0.286 | 0.314 | 0.284 |
|             | 0.29  | 0.303  | 0.272 | 0.31  | 0.265 |
|             | 0.312 | 0.326  | 0.299 | 0.351 | 0.298 |
|             | 0.317 | 0.332  | 0.308 | 0.342 | 0.304 |
| SHC Y317    | 0.454 | 0.501  | 0.52  | 0.562 | 0.562 |
|             | 0.405 | 0.501  | 0.482 | 0.511 | 0.506 |
|             | 0.452 | 0.524  | 0.548 | 0.599 | 0.583 |
|             | 0.451 | 0.537  | 0.562 | 0.585 | 0.576 |
| c-Cbl Y774  | 0.436 | 0.431  | 0.41  | 0.417 | 0.438 |
|             | 0.408 | 0.402  | 0.374 | 0.394 | 0.412 |
|             | 0.397 | 0.374  | 0.361 | 0.385 | 0.382 |
|             | 0.385 | 0.373  | 0.367 | 0.38  | 0.391 |

|               |        |       |       |       |        |
|---------------|--------|-------|-------|-------|--------|
| Paxillin Y118 | 0.733  | 0.695 | 0.665 | 0.728 | 0.737  |
|               | 0.682  | 0.672 | 0.617 | 0.69  | 0.668  |
|               | 0.682  | 0.648 | 0.616 | 0.687 | 0.65   |
|               | 0.668  | 0.645 | 0.624 | 0.68  | 0.661  |
| AKT S473      | 0.276  | 0.233 | 0.266 | 0.221 | 0.364  |
|               | 0.19   | 0.205 | 0.193 | 0.212 | 0.307  |
|               | 0.212  | 0.187 | 0.213 | 0.25  | 0.188  |
|               | 0.183  | 0.171 | 0.204 | 0.207 | 0.244  |
| GSK-3a/b S21  | 0.332  | 0.29  | 0.317 | 0.347 | 0.312  |
|               | 0.178  | 0.265 | 0.205 | 0.239 | 0.291  |
|               | 0.252  | 0.227 | 0.262 | 0.284 | 0.294  |
|               | 0.242  | 0.232 | 0.239 | 0.255 | 0.278  |
| RPS6 S235/S2  | 0.142  | 0.089 | 0.141 | 0.164 | 0.278  |
|               | 0.128  | 0.079 | 0.121 | 0.136 | 0.32   |
|               | 0.123  | 0.111 | 0.128 | 0.196 | 0.26   |
|               | 0.131  | 0.101 | 0.124 | 0.138 | 0.245  |
| RPS6 S240/S2  | 0.16   | 0.112 | 0.176 | 0.241 | 0.256  |
|               | 0.148  | 0.103 | 0.147 | 0.208 | 0.308  |
|               | 0.143  | 0.114 | 0.15  | 0.196 | 0.199  |
|               | 0.117  | 0.098 | 0.129 | 0.183 | 0.184  |
| PKCb S660     | 0.604  | 0.568 | 0.541 | 0.686 | 0.955  |
|               | 0.576  | 0.549 | 0.496 | 0.619 | 0.82   |
|               | 0.636  | 0.604 | 0.592 | 0.756 | 0.979  |
|               | 0.659  | 0.605 | 0.575 | 0.752 | 0.959  |
| PKCd S643     | 0.684  | 0.687 | 0.664 | 0.652 | 0.666  |
|               | 0.6883 | 0.671 | 0.637 | 0.63  | 0.631  |
|               | 0.695  | 0.701 | 0.694 | 0.685 | 0.677  |
|               | 0.686  | 0.712 | 0.705 | 0.666 | 0.684  |
| MARCKs S512,  | 0.792  | 0.788 | 0.764 | 0.724 | 0.797  |
|               | 0.65   | 0.774 | 0.688 | 0.688 | 0.627  |
|               | 0.684  | 0.678 | 0.708 | 0.707 | 0.675  |
|               | 0.659  | 0.679 | 0.695 | 0.698 | 0.677  |
| CAMI S81      | 0.545  | 0.513 | 0.504 | 0.584 | 0.626  |
|               | 0.525  | 0.487 | 0.523 | 0.531 | 0.552  |
|               | 0.489  | 0.574 | 0.559 | 0.497 | 0.526  |
|               | 0.582  | 0.565 | 0.605 | 0.496 | 0.499  |
| RSK3 T356/S3  | 0.602  | 0.587 | 0.588 | 0.661 | 0.6733 |
|               | 0.569  | 0.57  | 0.55  | 0.617 | 0.671  |
|               | 0.565  | 0.556 | 0.513 | 0.618 | 0.672  |

|              |        |       |       |       |        |
|--------------|--------|-------|-------|-------|--------|
|              | 0.552  | 0.553 | 0.558 | 0.615 | 0.677  |
| RAF S289/S29 | 0.2003 | 0.208 | 0.202 | 0.195 | 0.242  |
|              | 0.198  | 0.204 | 0.186 | 0.187 | 0.204  |
|              | 0.204  | 0.196 | 0.191 | 0.181 | 0.197  |
|              | 0.199  | 0.199 | 0.196 | 0.186 | 0.201  |
| MEK S217/S2  | 0.211  | 0.191 | 0.272 | 0.574 | 1.281  |
|              | 0.183  | 0.183 | 0.237 | 0.6   | 0.839  |
|              | 0.186  | 0.171 | 0.245 | 0.517 | 0.983  |
|              | 0.2    | 0.167 | 0.235 | 0.486 | 0.951  |
| ERK T202/Y20 | 0.428  | 0.385 | 0.489 | 0.867 | 1.082  |
|              | 0.389  | 0.383 | 0.459 | 0.788 | 1.059  |
|              | 0.392  | 0.343 | 0.454 | 0.78  | 0.828  |
|              | 0.368  | 0.342 | 0.441 | 0.763 | 0.841  |
| p90RSK S380  | 0.417  | 0.251 | 0.255 | 0.239 | 0.345  |
|              | 0.559  | 0.244 | 0.261 | 0.243 | 0.354  |
|              | 0.494  | 0.265 | 0.25  | 0.221 | 0.356  |
|              | 0.632  | 0.266 | 0.249 | 0.216 | 0.371  |
| STAT1 Y701   | 0.404  | 0.368 | 0.419 | 0.437 | 0.449  |
|              | 0.37   | 0.361 | 0.406 | 0.419 | 0.42   |
|              | 0.41   | 0.387 | 0.438 | 0.464 | 0.467  |
|              | 0.416  | 0.398 | 0.449 | 0.464 | 0.476  |
| STAT3 Y705   | 0.552  | 0.589 | 0.578 | 0.571 | 0.563  |
|              | 0.528  | 0.581 | 0.537 | 0.551 | 0.567  |
|              | 0.596  | 0.601 | 0.588 | 0.603 | 0.601  |
|              | 0.597  | 0.617 | 0.613 | 0.609 | 0.613  |
| CREB S133    | 0.549  | 0.578 | 0.608 | 0.627 | 0.768  |
|              | 0.507  | 0.617 | 0.522 | 0.528 | 0.58   |
|              | 0.549  | 0.557 | 0.622 | 0.638 | 0.735  |
|              | 0.598  | 0.598 | 0.602 | 0.652 | 0.724  |
| NF-kB S536   | 0.688  | 0.709 | 0.683 | 0.741 | 0.7097 |
|              | 0.616  | 0.693 | 0.66  | 0.679 | 0.682  |
|              | 0.654  | 0.663 | 0.656 | 0.684 | 0.725  |
|              | 0.637  | 0.659 | 0.644 | 0.687 | 0.722  |
| c-Jun S63    | 0.047  | 0.062 | 0.053 | 0.061 | 0.079  |
|              | 0.049  | 0.059 | 0.048 | 0.038 | 0.043  |
|              | 0.048  | 0.044 | 0.047 | 0.051 | 0.058  |
|              | 0.044  | 0.046 | 0.044 | 0.044 | 0.052  |

|               | PIK3CA sh6 |       |        |       |        |
|---------------|------------|-------|--------|-------|--------|
| PDGFRb Y771   | 0.302      | 0.319 | 0.334  | 0.307 | 0.315  |
|               | 0.3193     | 0.328 | 0.3333 | 0.263 | 0.239  |
|               | 0.334      | 0.333 | 0.34   | 0.341 | 0.308  |
|               | 0.322      | 0.33  | 0.326  | 0.305 | 0.298  |
| SHC Y317      | 0.49       | 0.553 | 0.595  | 0.548 | 0.607  |
|               | 0.372      | 0.525 | 0.565  | 0.482 | 0.5853 |
|               | 0.45       | 0.531 | 0.578  | 0.622 | 0.576  |
|               | 0.437      | 0.51  | 0.522  | 0.566 | 0.573  |
| c-Cbl Y774    | 0.422      | 0.443 | 0.432  | 0.405 | 0.413  |
|               | 0.403      | 0.423 | 0.4043 | 0.346 | 0.31   |
|               | 0.399      | 0.414 | 0.401  | 0.4   | 0.378  |
|               | 0.388      | 0.404 | 0.38   | 0.359 | 0.364  |
| Paxillin Y118 | 0.733      | 0.718 | 0.668  | 0.633 | 0.654  |
|               | 0.7163     | 0.698 | 0.443  | 0.533 | 0.487  |
|               | 0.71       | 0.695 | 0.632  | 0.62  | 0.609  |
|               | 0.706      | 0.683 | 0.602  | 0.576 | 0.596  |
| AKT S473      | 0.228      | 0.21  | 0.284  | 0.29  | 0.301  |
|               | 0.201      | 0.208 | 0.234  | 0.151 | 0.13   |
|               | 0.202      | 0.195 | 0.235  | 0.262 | 0.244  |
|               | 0.173      | 0.172 | 0.183  | 0.193 | 0.275  |
| GSK-3a/b S21  | 0.273      | 0.238 | 0.228  | 0.358 | 0.3    |
|               | 0.237      | 0.253 | 0.25   | 0.214 | 0.141  |
|               | 0.238      | 0.249 | 0.278  | 0.321 | 0.341  |
|               | 0.2        | 0.207 | 0.244  | 0.217 | 0.283  |
| RPS6 S235/S2  | 0.07       | 0.06  | 0.078  | 0.127 | 0.247  |
|               | 0.066      | 0.064 | 0.077  | 0.113 | 0.195  |
|               | 0.082      | 0.07  | 0.084  | 0.11  | 0.22   |
|               | 0.08       | 0.063 | 0.075  | 0.125 | 0.232  |
| RPS6 S240/S2  | 0.077      | 0.075 | 0.113  | 0.171 | 0.197  |
|               | 0.091      | 0.088 | 0.133  | 0.165 | 0.197  |
|               | 0.106      | 0.097 | 0.114  | 0.143 | 0.166  |
|               | 0.102      | 0.084 | 0.104  | 0.155 | 0.183  |
| PKCb S660     | 0.6045     | 0.621 | 0.599  | 0.713 | 0.949  |
|               | 0.6045     | 0.596 | 0.5823 | 0.618 | 0.627  |
|               | 0.607      | 0.606 | 0.591  | 0.828 | 0.957  |
|               | 0.602      | 0.606 | 0.557  | 0.745 | 0.932  |
| PKCd S643     | 0.7595     | 0.753 | 0.757  | 0.682 | 0.726  |
|               | 0.7595     | 0.732 | 0.734  | 0.632 | 0.7137 |

|              |        |       |        |       |        |
|--------------|--------|-------|--------|-------|--------|
|              | 0.759  | 0.73  | 0.742  | 0.78  | 0.714  |
|              | 0.76   | 0.716 | 0.703  | 0.707 | 0.701  |
| MARCKs S512, | 0.78   | 0.838 | 0.841  | 0.633 | 0.701  |
|              | 0.7353 | 0.785 | 0.437  | 0.523 | 0.395  |
|              | 0.738  | 0.768 | 0.752  | 0.705 | 0.682  |
|              | 0.688  | 0.749 | 0.642  | 0.579 | 0.592  |
| CAMI S81     | 0.969  | 0.867 | 0.741  | 0.679 | 0.629  |
|              | 0.556  | 0.708 | 0.423  | 0.535 | 0.468  |
|              | 0.716  | 0.75  | 0.681  | 0.739 | 0.69   |
|              | 0.607  | 0.652 | 0.611  | 0.586 | 0.594  |
| RSK3 T356/S3 | 0.586  | 0.614 | 0.613  | 0.659 | 0.769  |
|              | 0.5747 | 0.585 | 0.5717 | 0.566 | 0.549  |
|              | 0.575  | 0.578 | 0.579  | 0.654 | 0.738  |
|              | 0.563  | 0.568 | 0.523  | 0.562 | 0.636  |
| RAF S289/S29 | 0.219  | 0.218 | 0.212  | 0.188 | 0.23   |
|              | 0.2007 | 0.212 | 0.154  | 0.17  | 0.174  |
|              | 0.195  | 0.209 | 0.198  | 0.184 | 0.214  |
|              | 0.188  | 0.204 | 0.182  | 0.165 | 0.195  |
| MEK S217/S2  | 0.197  | 0.199 | 0.269  | 0.601 | 0.6883 |
|              | 0.164  | 0.179 | 0.167  | 0.43  | 0.472  |
|              | 0.185  | 0.18  | 0.259  | 0.557 | 0.894  |
|              | 0.182  | 0.162 | 0.224  | 0.508 | 0.699  |
| ERK T202/Y20 | 0.424  | 0.442 | 0.514  | 1.001 | 1.223  |
|              | 0.383  | 0.418 | 0.336  | 0.845 | 0.827  |
|              | 0.402  | 0.379 | 0.475  | 0.838 | 1.048  |
|              | 0.364  | 0.361 | 0.44   | 0.912 | 1.181  |
| p90RSK S380  | 0.226  | 0.266 | 0.353  | 0.355 | 0.428  |
|              | 0.276  | 0.245 | 0.419  | 0.329 | 0.491  |
|              | 0.557  | 0.459 | 0.548  | 0.362 | 0.45   |
|              | 0.809  | 0.481 | 0.546  | 0.282 | 0.365  |
| STAT1 Y701   | 0.429  | 0.442 | 0.476  | 0.489 | 0.514  |
|              | 0.41   | 0.441 | 0.392  | 0.431 | 0.389  |
|              | 0.441  | 0.423 | 0.443  | 0.473 | 0.45   |
|              | 0.425  | 0.414 | 0.418  | 0.446 | 0.443  |
| STAT3 Y705   | 0.656  | 0.617 | 0.571  | 0.522 | 0.595  |
|              | 0.552  | 0.606 | 0.447  | 0.499 | 0.499  |
|              | 0.579  | 0.595 | 0.575  | 0.574 | 0.574  |
|              | 0.576  | 0.601 | 0.543  | 0.542 | 0.576  |
| CREB S133    | 0.579  | 0.585 | 0.584  | 0.653 | 0.845  |

|               |             |        |        |       |       |
|---------------|-------------|--------|--------|-------|-------|
|               | 0.586       | 0.5825 | 0.5803 | 0.562 | 0.518 |
|               | 0.59        | 0.58   | 0.593  | 0.829 | 0.881 |
|               | 0.589       | 0.5825 | 0.564  | 0.745 | 0.787 |
| NF-kB S536    | 0.641       | 0.672  | 0.704  | 0.716 | 0.778 |
|               | 0.6423      | 0.677  | 0.7013 | 0.652 | 0.66  |
|               | 0.636       | 0.662  | 0.697  | 0.714 | 0.76  |
|               | 0.65        | 0.681  | 0.703  | 0.664 | 0.731 |
| c-Jun S63     | 0.045       | 0.056  | 0.045  | 0.04  | 0.046 |
|               | 0.021       | 0.044  | 0.018  | 0.027 | 0.021 |
|               | 0.031       | 0.037  | 0.035  | 0.03  | 0.036 |
|               | 0.033       | 0.031  | 0.032  | 0.028 | 0.032 |
|               | PIK3CB sh03 |        |        |       |       |
| PDGFRb Y771   | 0.312       | 0.343  | 0.266  | 0.275 | 0.333 |
|               | 0.267       | 0.329  | 0.278  | 0.302 | 0.308 |
|               | 0.291       | 0.297  | 0.28   | 0.295 | 0.316 |
|               | 0.284       | 0.295  | 0.279  | 0.303 | 0.312 |
| SHC Y317      | 0.454       | 0.507  | 0.434  | 0.45  | 0.527 |
|               | 0.425       | 0.478  | 0.441  | 0.509 | 0.471 |
|               | 0.443       | 0.474  | 0.482  | 0.524 | 0.519 |
|               | 0.43        | 0.482  | 0.485  | 0.529 | 0.507 |
| c-Cbl Y774    | 0.371       | 0.403  | 0.325  | 0.344 | 0.366 |
|               | 0.3743      | 0.39   | 0.332  | 0.374 | 0.325 |
|               | 0.38        | 0.402  | 0.37   | 0.397 | 0.363 |
|               | 0.372       | 0.396  | 0.362  | 0.4   | 0.369 |
| Paxillin Y118 | 0.665       | 0.704  | 0.578  | 0.583 | 0.677 |
|               | 0.68        | 0.676  | 0.614  | 0.631 | 0.641 |
|               | 0.684       | 0.691  | 0.669  | 0.674 | 0.698 |
|               | 0.691       | 0.682  | 0.649  | 0.645 | 0.692 |
| AKT S473      | 0.263       | 0.148  | 0.185  | 0.179 | 0.332 |
|               | 0.118       | 0.23   | 0.183  | 0.265 | 0.236 |
|               | 0.243       | 0.237  | 0.254  | 0.226 | 0.291 |
|               | 0.22        | 0.216  | 0.24   | 0.205 | 0.251 |
| GSK-3a/b S21  | 0.241       | 0.264  | 0.175  | 0.147 | 0.269 |
|               | 0.264       | 0.23   | 0.17   | 0.229 | 0.232 |
|               | 0.287       | 0.274  | 0.278  | 0.301 | 0.255 |
|               | 0.264       | 0.264  | 0.287  | 0.312 | 0.253 |
| RPS6 S235/S2  | 0.099       | 0.052  | 0.122  | 0.118 | 0.222 |

|              |        |       |       |       |       |
|--------------|--------|-------|-------|-------|-------|
|              | 0.109  | 0.05  | 0.099 | 0.113 | 0.213 |
|              | 0.094  | 0.096 | 0.076 | 0.106 | 0.203 |
|              | 0.087  | 0.067 | 0.062 | 0.12  | 0.19  |
| RPS6 S240/S2 | 0.111  | 0.046 | 0.143 | 0.15  | 0.129 |
|              | 0.116  | 0.043 | 0.123 | 0.166 | 0.179 |
|              | 0.096  | 0.09  | 0.077 | 0.113 | 0.126 |
|              | 0.085  | 0.057 | 0.062 | 0.127 | 0.122 |
| PKCb S660    | 0.573  | 0.594 | 0.511 | 0.629 | 1.05  |
|              | 0.5887 | 0.578 | 0.538 | 0.737 | 0.848 |
|              | 0.6    | 0.598 | 0.58  | 0.77  | 0.992 |
|              | 0.593  | 0.584 | 0.539 | 0.775 | 0.996 |
| PKCd S643    | 0.65   | 0.707 | 0.57  | 0.599 | 0.654 |
|              | 0.6453 | 0.665 | 0.59  | 0.647 | 0.592 |
|              | 0.653  | 0.649 | 0.609 | 0.637 | 0.61  |
|              | 0.633  | 0.642 | 0.611 | 0.655 | 0.611 |
| MARCKs S512, | 0.617  | 0.837 | 0.527 | 0.541 | 0.764 |
|              | 0.461  | 0.761 | 0.56  | 0.629 | 0.571 |
|              | 0.668  | 0.734 | 0.679 | 0.732 | 0.796 |
|              | 0.638  | 0.726 | 0.676 | 0.732 | 0.735 |
| CAMI S81     | 0.512  | 0.557 | 0.466 | 0.459 | 0.561 |
|              | 0.465  | 0.625 | 0.531 | 0.582 | 0.518 |
|              | 0.467  | 0.454 | 0.459 | 0.471 | 0.49  |
|              | 0.443  | 0.437 | 0.442 | 0.46  | 0.498 |
| RSK3 T356/S3 | 0.546  | 0.582 | 0.474 | 0.527 | 0.698 |
|              | 0.5433 | 0.556 | 0.49  | 0.566 | 0.568 |
|              | 0.541  | 0.559 | 0.521 | 0.615 | 0.668 |
|              | 0.543  | 0.553 | 0.527 | 0.618 | 0.649 |
| RAF S289/S29 | 0.181  | 0.207 | 0.161 | 0.153 | 0.209 |
|              | 0.188  | 0.196 | 0.178 | 0.174 | 0.188 |
|              | 0.191  | 0.196 | 0.195 | 0.187 | 0.205 |
|              | 0.192  | 0.201 | 0.197 | 0.189 | 0.204 |
| MEK S217/S2: | 0.153  | 0.188 | 0.209 | 0.383 | 1.049 |
|              | 0.155  | 0.176 | 0.227 | 0.432 | 0.577 |
|              | 0.161  | 0.189 | 0.252 | 0.502 | 1.016 |
|              | 0.188  | 0.185 | 0.221 | 0.535 | 0.872 |
| ERK T202/Y20 | 0.367  | 0.37  | 0.401 | 0.574 | 0.981 |
|              | 0.334  | 0.35  | 0.414 | 0.721 | 0.853 |
|              | 0.351  | 0.343 | 0.42  | 0.659 | 0.959 |
|              | 0.334  | 0.352 | 0.377 | 0.814 | 0.9   |

|             |             |       |       |       |       |
|-------------|-------------|-------|-------|-------|-------|
| p90RSK S380 | 0.546       | 0.195 | 0.243 | 0.234 | 0.243 |
|             | 0.663       | 0.175 | 0.246 | 0.214 | 0.34  |
|             | 0.449       | 0.252 | 0.243 | 0.231 | 0.341 |
|             | 0.51        | 0.244 | 0.24  | 0.229 | 0.398 |
| STAT1 Y701  | 0.399       | 0.429 | 0.376 | 0.391 | 0.452 |
|             | 0.381       | 0.418 | 0.385 | 0.409 | 0.408 |
|             | 0.402       | 0.404 | 0.401 | 0.418 | 0.417 |
|             | 0.39        | 0.395 | 0.413 | 0.431 | 0.411 |
| STAT3 Y705  | 0.563       | 0.561 | 0.536 | 0.542 | 0.552 |
|             | 0.549       | 0.551 | 0.542 | 0.566 | 0.556 |
|             | 0.57        | 0.539 | 0.551 | 0.554 | 0.545 |
|             | 0.571       | 0.548 | 0.565 | 0.566 | 0.568 |
| CREB S133   | 0.491       | 0.675 | 0.53  | 0.517 | 0.882 |
|             | 0.448       | 0.663 | 0.584 | 0.674 | 0.66  |
|             | 0.513       | 0.57  | 0.634 | 0.653 | 0.799 |
|             | 0.503       | 0.61  | 0.585 | 0.689 | 0.781 |
| NF-kB S536  | 0.584       | 0.622 | 0.571 | 0.539 | 0.673 |
|             | 0.599       | 0.62  | 0.577 | 0.596 | 0.622 |
|             | 0.615       | 0.645 | 0.632 | 0.641 | 0.682 |
|             | 0.598       | 0.637 | 0.603 | 0.647 | 0.688 |
| c-Jun S63   | 0.045       | 0.048 | 0.026 | 0.027 | 0.052 |
|             | 0.028       | 0.039 | 0.032 | 0.039 | 0.04  |
|             | 0.0413      | 0.053 | 0.045 | 0.041 | 0.057 |
|             | 0.051       | 0.045 | 0.041 | 0.044 | 0.048 |
| PDGFRb Y771 | PIK3CB sh16 |       |       |       |       |
|             | 0.266       | 0.272 | 0.252 | 0.223 | 0.225 |
|             | 0.266       | 0.286 | 0.267 | 0.234 | 0.259 |
|             | 0.285       | 0.278 | 0.261 | 0.254 | 0.27  |
|             | 0.272       | 0.295 | 0.298 | 0.231 | 0.285 |
| SHC Y317    | 0.346       | 0.419 | 0.356 | 0.389 | 0.354 |
|             | 0.357       | 0.44  | 0.401 | 0.442 | 0.403 |
|             | 0.398       | 0.47  | 0.473 | 0.525 | 0.479 |
|             | 0.385       | 0.47  | 0.471 | 0.435 | 0.503 |
| c-Cbl Y774  | 0.357       | 0.379 | 0.3   | 0.304 | 0.309 |
|             | 0.35        | 0.392 | 0.334 | 0.329 | 0.361 |
|             | 0.381       | 0.393 | 0.347 | 0.383 | 0.369 |
|             | 0.39        | 0.404 | 0.357 | 0.33  | 0.377 |

|               |       |       |       |       |       |
|---------------|-------|-------|-------|-------|-------|
| Paxillin Y118 | 0.612 | 0.695 | 0.538 | 0.507 | 0.523 |
|               | 0.596 | 0.717 | 0.636 | 0.551 | 0.65  |
|               | 0.622 | 0.725 | 0.607 | 0.619 | 0.61  |
|               | 0.677 | 0.734 | 0.676 | 0.565 | 0.618 |
| AKT S473      | 0.207 | 0.254 | 0.132 | 0.121 | 0.167 |
|               | 0.188 | 0.156 | 0.223 | 0.176 | 0.169 |
|               | 0.276 | 0.236 | 0.244 | 0.345 | 0.306 |
|               | 0.232 | 0.238 | 0.204 | 0.214 | 0.33  |
| GSK-3a/b S21  | 0.165 | 0.234 | 0.107 | 0.121 | 0.137 |
|               | 0.193 | 0.253 | 0.203 | 0.155 | 0.233 |
|               | 0.333 | 0.271 | 0.248 | 0.35  | 0.249 |
|               | 0.248 | 0.272 | 0.31  | 0.218 | 0.263 |
| RPS6 S235/S2  | 0.144 | 0.084 | 0.153 | 0.151 | 0.205 |
|               | 0.157 | 0.083 | 0.153 | 0.138 | 0.267 |
|               | 0.141 | 0.119 | 0.136 | 0.202 | 0.289 |
|               | 0.126 | 0.106 | 0.121 | 0.2   | 0.301 |
| RPS6 S240/S2  | 0.134 | 0.076 | 0.144 | 0.199 | 0.204 |
|               | 0.145 | 0.071 | 0.159 | 0.211 | 0.231 |
|               | 0.121 | 0.103 | 0.128 | 0.187 | 0.18  |
|               | 0.109 | 0.088 | 0.114 | 0.216 | 0.185 |
| PKCb S660     | 0.502 | 0.594 | 0.445 | 0.498 | 0.618 |
|               | 0.515 | 0.596 | 0.519 | 0.58  | 0.737 |
|               | 0.605 | 0.635 | 0.545 | 0.753 | 0.986 |
|               | 0.569 | 0.632 | 0.567 | 0.616 | 0.98  |
| PKCd S643     | 0.527 | 0.664 | 0.566 | 0.583 | 0.543 |
|               | 0.555 | 0.693 | 0.62  | 0.61  | 0.58  |
|               | 0.591 | 0.666 | 0.63  | 0.68  | 0.627 |
|               | 0.585 | 0.699 | 0.651 | 0.614 | 0.641 |
| MARCKs S512,  | 0.467 | 0.595 | 0.371 | 0.369 | 0.381 |
|               | 0.469 | 0.627 | 0.475 | 0.41  | 0.497 |
|               | 0.605 | 0.615 | 0.536 | 0.55  | 0.587 |
|               | 0.541 | 0.628 | 0.581 | 0.447 | 0.6   |
| CAMI S81      | 0.44  | 0.581 | 0.39  | 0.332 | 0.356 |
|               | 0.443 | 0.514 | 0.411 | 0.383 | 0.499 |
|               | 0.504 | 0.547 | 0.468 | 0.505 | 0.5   |
|               | 0.497 | 0.502 | 0.532 | 0.395 | 0.523 |
| RSK3 T356/S3  | 0.518 | 0.515 | 0.495 | 0.491 | 0.504 |
|               | 0.529 | 0.527 | 0.532 | 0.514 | 0.586 |
|               | 0.555 | 0.527 | 0.529 | 0.589 | 0.636 |
|               | 0.548 | 0.532 | 0.545 | 0.531 | 0.637 |

|              |       |       |       |       |       |
|--------------|-------|-------|-------|-------|-------|
| RAF S289/S29 | 0.156 | 0.171 | 0.148 | 0.132 | 0.147 |
|              | 0.166 | 0.183 | 0.17  | 0.14  | 0.179 |
|              | 0.176 | 0.173 | 0.174 | 0.168 | 0.176 |
|              | 0.176 | 0.183 | 0.178 | 0.142 | 0.182 |
| MEK S217/S2  | 0.145 | 0.159 | 0.165 | 0.204 | 0.355 |
|              | 0.158 | 0.171 | 0.201 | 0.256 | 0.44  |
|              | 0.162 | 0.174 | 0.216 | 0.428 | 0.653 |
|              | 0.178 | 0.169 | 0.219 | 0.284 | 0.655 |
| ERK T202/Y20 | 0.315 | 0.334 | 0.327 | 0.396 | 0.569 |
|              | 0.298 | 0.336 | 0.362 | 0.479 | 0.772 |
|              | 0.334 | 0.333 | 0.361 | 0.658 | 0.769 |
|              | 0.325 | 0.352 | 0.372 | 0.52  | 0.996 |
| p90RSK S380  | 0.788 | 0.189 | 0.269 | 0.225 | 0.25  |
|              | 0.778 | 0.176 | 0.258 | 0.26  | 0.238 |
|              | 0.439 | 0.222 | 0.267 | 0.243 | 0.375 |
|              | 0.404 | 0.212 | 0.247 | 0.289 | 0.275 |
| STAT1 Y701   | 0.357 | 0.353 | 0.33  | 0.328 | 0.4   |
|              | 0.361 | 0.386 | 0.343 | 0.347 | 0.376 |
|              | 0.371 | 0.384 | 0.353 | 0.377 | 0.421 |
|              | 0.372 | 0.39  | 0.363 | 0.345 | 0.403 |
| STAT3 Y705   | 0.523 | 0.553 | 0.526 | 0.474 | 0.508 |
|              | 0.521 | 0.566 | 0.564 | 0.509 | 0.529 |
|              | 0.541 | 0.565 | 0.575 | 0.552 | 0.562 |
|              | 0.536 | 0.577 | 0.588 | 0.508 | 0.567 |
| CREB S133    | 0.483 | 0.586 | 0.443 | 0.415 | 0.471 |
|              | 0.534 | 0.667 | 0.573 | 0.491 | 0.67  |
|              | 0.582 | 0.556 | 0.602 | 0.671 | 0.8   |
|              | 0.645 | 0.646 | 0.642 | 0.533 | 0.845 |
| NF-kB S536   | 0.529 | 0.609 | 0.522 | 0.541 | 0.557 |
|              | 0.548 | 0.614 | 0.594 | 0.59  | 0.617 |
|              | 0.603 | 0.622 | 0.622 | 0.671 | 0.71  |
|              | 0.584 | 0.631 | 0.628 | 0.568 | 0.725 |
| c-Jun S63    | 0.033 | 0.039 | 0.025 | 0.018 | 0.026 |
|              | 0.032 | 0.056 | 0.035 | 0.022 | 0.039 |
|              | 0.051 | 0.051 | 0.04  | 0.04  | 0.054 |
|              | 0.038 | 0.058 | 0.052 | 0.026 | 0.063 |

|               | PI3K pool |        |       |        |        |
|---------------|-----------|--------|-------|--------|--------|
| PDGFRb Y771   | 0.304     | 0.277  | 0.32  | 0.324  | 0.331  |
|               | 0.291     | 0.291  | 0.34  | 0.325  | 0.324  |
|               | 0.311     | 0.302  | 0.317 | 0.358  | 0.384  |
|               | 0.275     | 0.248  | 0.331 | 0.363  | 0.306  |
| SHC Y317      | 0.498     | 0.522  | 0.576 | 0.546  | 0.556  |
|               | 0.52      | 0.553  | 0.606 | 0.568  | 0.579  |
|               | 0.574     | 0.571  | 0.621 | 0.6    | 0.63   |
|               | 0.527     | 0.484  | 0.588 | 0.588  | 0.54   |
| c-Cbl Y774    | 0.408     | 0.358  | 0.39  | 0.414  | 0.374  |
|               | 0.428     | 0.392  | 0.424 | 0.425  | 0.399  |
|               | 0.462     | 0.412  | 0.447 | 0.435  | 0.441  |
|               | 0.441     | 0.339  | 0.446 | 0.448  | 0.407  |
| Paxillin Y118 | 0.661     | 0.578  | 0.585 | 0.607  | 0.603  |
|               | 0.699     | 0.639  | 0.609 | 0.607  | 0.637  |
|               | 0.75      | 0.695  | 0.661 | 0.665  | 0.722  |
|               | 0.709     | 0.567  | 0.667 | 0.695  | 0.655  |
| AKT S473      | 0.194     | 0.199  | 0.206 | 0.23   | 0.18   |
|               | 0.193     | 0.205  | 0.208 | 0.215  | 0.284  |
|               | 0.231     | 0.25   | 0.239 | 0.267  | 0.292  |
|               | 0.185     | 0.182  | 0.25  | 0.261  | 0.247  |
| GSK-3a/b S21  | 0.236     | 0.238  | 0.272 | 0.192  | 0.229  |
|               | 0.229     | 0.269  | 0.283 | 0.21   | 0.282  |
|               | 0.297     | 0.378  | 0.421 | 0.371  | 0.557  |
|               | 0.339     | 0.26   | 0.282 | 0.387  | 0.332  |
| RPS6 S235/S2  | 0.091     | 0.09   | 0.095 | 0.13   | 0.186  |
|               | 0.09      | 0.102  | 0.103 | 0.146  | 0.201  |
|               | 0.098     | 0.097  | 0.114 | 0.114  | 0.239  |
|               | 0.095     | 0.0963 | 0.111 | 0.126  | 0.189  |
| RPS6 S240/S2  | 0.075     | 0.083  | 0.087 | 0.102  | 0.084  |
|               | 0.074     | 0.098  | 0.101 | 0.125  | 0.104  |
|               | 0.074     | 0.081  | 0.091 | 0.077  | 0.101  |
|               | 0.083     | 0.0873 | 0.119 | 0.099  | 0.177  |
| PKCb S660     | 0.616     | 0.601  | 0.696 | 0.831  | 0.983  |
|               | 0.628     | 0.614  | 0.683 | 0.823  | 0.977  |
|               | 0.692     | 0.662  | 0.771 | 0.891  | 1.107  |
|               | 0.606     | 0.496  | 0.605 | 0.81   | 0.824  |
| PKCd S643     | 0.709     | 0.72   | 0.726 | 0.763  | 0.733  |
|               | 0.734     | 0.768  | 0.744 | 0.751  | 0.771  |
|               | 0.792     | 0.8    | 0.762 | 0.7507 | 0.7377 |

|              |        |       |       |       |       |
|--------------|--------|-------|-------|-------|-------|
|              | 0.698  | 0.663 | 0.702 | 0.738 | 0.709 |
| MARCKs S512, | 0.739  | 0.612 | 0.678 | 0.706 | 0.701 |
|              | 0.677  | 0.632 | 0.677 | 0.711 | 0.684 |
|              | 0.716  | 0.673 | 0.681 | 0.738 | 0.703 |
|              | 0.615  | 0.639 | 0.673 | 0.731 | 0.594 |
| CAMI S81     | 0.569  | 0.507 | 0.557 | 0.434 | 0.573 |
|              | 0.561  | 0.475 | 0.482 | 0.455 | 0.498 |
|              | 0.535  | 0.528 | 0.541 | 0.538 | 0.605 |
|              | 0.442  | 0.414 | 0.528 | 0.497 | 0.504 |
| RSK3 T356/S3 | 0.487  | 0.51  | 0.605 | 0.688 | 0.758 |
|              | 0.511  | 0.558 | 0.608 | 0.674 | 0.795 |
|              | 0.547  | 0.593 | 0.662 | 0.734 | 0.931 |
|              | 0.528  | 0.528 | 0.626 | 0.734 | 0.753 |
| RAF S289/S29 | 0.178  | 0.177 | 0.183 | 0.189 | 0.206 |
|              | 0.193  | 0.19  | 0.19  | 0.193 | 0.214 |
|              | 0.202  | 0.202 | 0.2   | 0.21  | 0.236 |
|              | 0.185  | 0.167 | 0.187 | 0.218 | 0.205 |
| MEK S217/S2  | 0.178  | 0.177 | 0.473 | 0.61  | 0.943 |
|              | 0.183  | 0.186 | 0.434 | 0.55  | 0.959 |
|              | 0.1813 | 0.189 | 0.467 | 0.7   | 1.209 |
|              | 0.183  | 0.172 | 0.436 | 0.649 | 0.803 |
| ERK T202/Y20 | 0.381  | 0.357 | 0.792 | 0.72  | 1.081 |
|              | 0.422  | 0.393 | 0.746 | 0.893 | 1.13  |
|              | 0.458  | 0.374 | 0.858 | 0.798 | 1.286 |
|              | 0.392  | 0.344 | 0.737 | 0.768 | 1.03  |
| p90RSK S380  | 0.254  | 0.272 | 0.278 | 0.314 | 0.41  |
|              | 0.254  | 0.28  | 0.294 | 0.332 | 0.379 |
|              | 0.254  | 0.244 | 0.303 | 0.475 | 0.608 |
|              | 0.254  | 0.293 | 0.312 | 0.53  | 0.563 |
| STAT1 Y701   | 0.417  | 0.421 | 0.414 | 0.424 | 0.441 |
|              | 0.439  | 0.439 | 0.427 | 0.433 | 0.439 |
|              | 0.4173 | 0.451 | 0.427 | 0.472 | 0.464 |
|              | 0.396  | 0.401 | 0.44  | 0.448 | 0.399 |
| STAT3 Y705   | 0.604  | 0.63  | 0.62  | 0.641 | 0.627 |
|              | 0.633  | 0.662 | 0.643 | 0.639 | 0.667 |
|              | 0.668  | 0.673 | 0.663 | 0.665 | 0.682 |
|              | 0.596  | 0.57  | 0.647 | 0.653 | 0.62  |
| CREB S133    | 0.778  | 0.618 | 0.794 | 0.862 | 0.976 |
|              | 0.768  | 0.711 | 0.81  | 0.902 | 1.027 |

|               |          |        |       |       |        |
|---------------|----------|--------|-------|-------|--------|
|               | 0.856    | 0.78   | 0.903 | 1.033 | 1.152  |
|               | 0.703    | 0.703  | 0.742 | 0.905 | 0.776  |
| NF-kB S536    | 0.69     | 0.733  | 0.756 | 0.795 | 0.797  |
|               | 0.714    | 0.76   | 0.759 | 0.803 | 0.819  |
|               | 0.759    | 0.8    | 0.852 | 0.862 | 0.902  |
|               | 0.725    | 0.677  | 0.739 | 0.856 | 0.812  |
| c-Jun S63     | 0.043    | 0.044  | 0.049 | 0.052 | 0.05   |
|               | 0.049    | 0.055  | 0.061 | 0.063 | 0.047  |
|               | 0.056    | 0.058  | 0.055 | 0.065 | 0.064  |
|               | 0.054    | 0.038  | 0.057 | 0.058 | 0.054  |
|               | AKT1 sh1 |        |       |       |        |
| PDGFRb Y771   | 0.287    | 0.298  | 0.266 | 0.27  | 0.289  |
|               | 0.29     | 0.293  | 0.25  | 0.234 | 0.232  |
|               | 0.3      | 0.286  | 0.28  | 0.268 | 0.294  |
|               | 0.283    | 0.2923 | 0.292 | 0.273 | 0.288  |
| SHC Y317      | 0.416    | 0.468  | 0.464 | 0.497 | 0.493  |
|               | 0.34     | 0.481  | 0.418 | 0.451 | 0.385  |
|               | 0.43     | 0.494  | 0.505 | 0.525 | 0.541  |
|               | 0.428    | 0.524  | 0.524 | 0.553 | 0.538  |
| c-Cbl Y774    | 0.434    | 0.424  | 0.418 | 0.415 | 0.413  |
|               | 0.345    | 0.417  | 0.386 | 0.382 | 0.384  |
|               | 0.407    | 0.388  | 0.39  | 0.381 | 0.379  |
|               | 0.391    | 0.396  | 0.397 | 0.383 | 0.36   |
| Paxillin Y118 | 0.716    | 0.714  | 0.689 | 0.703 | 0.671  |
|               | 0.6893   | 0.701  | 0.584 | 0.604 | 0.52   |
|               | 0.701    | 0.67   | 0.637 | 0.666 | 0.624  |
|               | 0.651    | 0.669  | 0.641 | 0.666 | 0.621  |
| AKT S473      | 0.26     | 0.239  | 0.34  | 0.277 | 0.2433 |
|               | 0.2637   | 0.324  | 0.224 | 0.276 | 0.181  |
|               | 0.305    | 0.275  | 0.248 | 0.277 | 0.278  |
|               | 0.226    | 0.237  | 0.225 | 0.215 | 0.271  |
| GSK-3a/b S21  | 0.259    | 0.227  | 0.362 | 0.257 | 0.362  |
|               | 0.2853   | 0.356  | 0.233 | 0.263 | 0.154  |
|               | 0.319    | 0.252  | 0.261 | 0.302 | 0.244  |
|               | 0.278    | 0.288  | 0.258 | 0.322 | 0.334  |
| RPS6 S235/S2  | 0.078    | 0.053  | 0.061 | 0.124 | 0.322  |
|               | 0.076    | 0.056  | 0.103 | 0.161 | 0.21   |

|              |        |       |       |       |        |
|--------------|--------|-------|-------|-------|--------|
|              | 0.1    | 0.066 | 0.062 | 0.117 | 0.289  |
|              | 0.076  | 0.058 | 0.066 | 0.118 | 0.334  |
| RPS6 S240/S2 | 0.088  | 0.067 | 0.081 | 0.112 | 0.165  |
|              | 0.095  | 0.067 | 0.13  | 0.162 | 0.239  |
|              | 0.086  | 0.07  | 0.068 | 0.095 | 0.133  |
|              | 0.07   | 0.055 | 0.069 | 0.107 | 0.172  |
| PKCb S660    | 0.563  | 0.577 | 0.502 | 0.763 | 0.924  |
|              | 0.59   | 0.546 | 0.437 | 0.618 | 0.576  |
|              | 0.605  | 0.597 | 0.554 | 0.837 | 1.029  |
|              | 0.602  | 0.6   | 0.544 | 0.912 | 1.054  |
| PKCd S643    | 0.699  | 0.696 | 0.659 | 0.672 | 0.631  |
|              | 0.7033 | 0.695 | 0.621 | 0.636 | 0.648  |
|              | 0.71   | 0.699 | 0.681 | 0.693 | 0.66   |
|              | 0.701  | 0.71  | 0.708 | 0.713 | 0.653  |
| MARCKs S512, | 0.677  | 0.756 | 0.694 | 0.696 | 0.691  |
|              | 0.6353 | 0.783 | 0.536 | 0.552 | 0.6177 |
|              | 0.622  | 0.653 | 0.648 | 0.66  | 0.59   |
|              | 0.607  | 0.733 | 0.638 | 0.657 | 0.572  |
| CAMI S81     | 0.506  | 0.526 | 0.558 | 0.487 | 0.538  |
|              | 0.403  | 0.533 | 0.453 | 0.478 | 0.413  |
|              | 0.617  | 0.618 | 0.555 | 0.578 | 0.479  |
|              | 0.584  | 0.504 | 0.562 | 0.486 | 0.572  |
| RSK3 T356/S3 | 0.612  | 0.621 | 0.59  | 0.665 | 0.765  |
|              | 0.5953 | 0.633 | 0.515 | 0.574 | 0.552  |
|              | 0.599  | 0.594 | 0.516 | 0.62  | 0.687  |
|              | 0.575  | 0.599 | 0.565 | 0.643 | 0.652  |
| RAF S289/S29 | 0.23   | 0.22  | 0.206 | 0.217 | 0.224  |
|              | 0.169  | 0.212 | 0.178 | 0.185 | 0.161  |
|              | 0.204  | 0.194 | 0.19  | 0.184 | 0.189  |
|              | 0.192  | 0.195 | 0.191 | 0.193 | 0.194  |
| MEK S217/S21 | 0.174  | 0.194 | 0.272 | 0.767 | 1.184  |
|              | 0.131  | 0.206 | 0.223 | 0.585 | 0.47   |
|              | 0.164  | 0.182 | 0.228 | 0.668 | 0.859  |
|              | 0.169  | 0.196 | 0.241 | 0.713 | 0.858  |
| ERK T202/Y20 | 0.434  | 0.405 | 0.512 | 0.838 | 1.158  |
|              | 0.33   | 0.426 | 0.475 | 0.836 | 0.825  |
|              | 0.397  | 0.386 | 0.461 | 0.715 | 0.949  |
|              | 0.351  | 0.39  | 0.477 | 0.776 | 0.949  |
| p90RSK S380  | 0.417  | 0.27  | 0.275 | 0.241 | 0.365  |

|               |          |       |        |        |        |
|---------------|----------|-------|--------|--------|--------|
|               | 0.515    | 0.222 | 0.284  | 0.253  | 0.395  |
|               | 0.296    | 0.295 | 0.265  | 0.235  | 0.441  |
|               | 0.529    | 0.286 | 0.247  | 0.26   | 0.528  |
| STAT1 Y701    | 0.4      | 0.403 | 0.398  | 0.4    | 0.44   |
|               | 0.402    | 0.4   | 0.387  | 0.378  | 0.387  |
|               | 0.411    | 0.401 | 0.413  | 0.418  | 0.476  |
|               | 0.395    | 0.429 | 0.433  | 0.43   | 0.481  |
| STAT3 Y705    | 0.573    | 0.597 | 0.557  | 0.532  | 0.566  |
|               | 0.5963   | 0.604 | 0.523  | 0.541  | 0.534  |
|               | 0.608    | 0.601 | 0.579  | 0.573  | 0.641  |
|               | 0.608    | 0.628 | 0.592  | 0.588  | 0.631  |
| CREB S133     | 0.573    | 0.525 | 0.65   | 0.763  | 0.93   |
|               | 0.437    | 0.623 | 0.548  | 0.571  | 0.523  |
|               | 0.648    | 0.522 | 0.682  | 0.756  | 0.937  |
|               | 0.607    | 0.647 | 0.685  | 0.86   | 0.911  |
| NF-kB S536    | 0.691    | 0.683 | 0.709  | 0.791  | 0.836  |
|               | 0.6723   | 0.688 | 0.619  | 0.671  | 0.636  |
|               | 0.671    | 0.652 | 0.674  | 0.745  | 0.791  |
|               | 0.655    | 0.653 | 0.685  | 0.801  | 0.805  |
| c-Jun S63     | 0.039    | 0.042 | 0.029  | 0.036  | 0.051  |
|               | 0.022    | 0.041 | 0.029  | 0.031  | 0.0437 |
|               | 0.034    | 0.032 | 0.035  | 0.038  | 0.038  |
|               | 0.033    | 0.038 | 0.038  | 0.036  | 0.042  |
|               | AKT1 sh4 |       |        |        |        |
| PDGFRb Y771   | 0.284    | 0.323 | 0.308  | 0.306  | 0.329  |
|               | 0.3053   | 0.337 | 0.3147 | 0.308  | 0.3207 |
|               | 0.316    | 0.345 | 0.324  | 0.314  | 0.323  |
|               | 0.316    | 0.345 | 0.312  | 0.304  | 0.31   |
| SHC Y317      | 0.459    | 0.544 | 0.578  | 0.621  | 0.629  |
|               | 0.373    | 0.582 | 0.563  | 0.5917 | 0.5683 |
|               | 0.465    | 0.545 | 0.554  | 0.579  | 0.544  |
|               | 0.453    | 0.559 | 0.557  | 0.575  | 0.532  |
| c-Cbl Y774    | 0.38     | 0.428 | 0.442  | 0.407  | 0.414  |
|               | 0.377    | 0.429 | 0.354  | 0.385  | 0.3943 |
|               | 0.382    | 0.415 | 0.407  | 0.38   | 0.385  |
|               | 0.369    | 0.403 | 0.42   | 0.368  | 0.384  |
| Paxillin Y118 | 0.685    | 0.656 | 0.706  | 0.685  | 0.719  |

|              |        |       |        |        |        |
|--------------|--------|-------|--------|--------|--------|
|              | 0.6787 | 0.668 | 0.6837 | 0.656  | 0.6807 |
|              | 0.674  | 0.665 | 0.67   | 0.654  | 0.678  |
|              | 0.677  | 0.669 | 0.675  | 0.629  | 0.645  |
| AKT S473     | 0.224  | 0.392 | 0.403  | 0.323  | 0.457  |
|              | 0.074  | 0.348 | 0.115  | 0.068  | 0.079  |
|              | 0.324  | 0.204 | 0.289  | 0.258  | 0.261  |
|              | 0.273  | 0.248 | 0.256  | 0.299  | 0.374  |
| GSK-3a/b S21 | 0.272  | 0.306 | 0.332  | 0.259  | 0.299  |
|              | 0.2583 | 0.321 | 0.2873 | 0.281  | 0.307  |
|              | 0.268  | 0.263 | 0.275  | 0.302  | 0.302  |
|              | 0.235  | 0.237 | 0.255  | 0.282  | 0.32   |
| RPS6 S235/S2 | 0.093  | 0.074 | 0.105  | 0.137  | 0.33   |
|              | 0.082  | 0.067 | 0.116  | 0.118  | 0.19   |
|              | 0.137  | 0.088 | 0.107  | 0.13   | 0.27   |
|              | 0.124  | 0.085 | 0.104  | 0.157  | 0.347  |
| RPS6 S240/S2 | 0.095  | 0.105 | 0.128  | 0.188  | 0.244  |
|              | 0.116  | 0.088 | 0.176  | 0.186  | 0.216  |
|              | 0.157  | 0.115 | 0.13   | 0.173  | 0.217  |
|              | 0.136  | 0.101 | 0.132  | 0.195  | 0.246  |
| PKCb S660    | 0.64   | 0.68  | 0.597  | 0.965  | 1.088  |
|              | 0.617  | 0.675 | 0.463  | 0.54   | 0.544  |
|              | 0.595  | 0.646 | 0.578  | 0.892  | 1.002  |
|              | 0.616  | 0.661 | 0.577  | 0.901  | 0.973  |
| PKCd S643    | 0.768  | 0.711 | 0.752  | 0.712  | 0.751  |
|              | 0.7657 | 0.736 | 0.746  | 0.712  | 0.7423 |
|              | 0.766  | 0.73  | 0.753  | 0.726  | 0.758  |
|              | 0.763  | 0.748 | 0.733  | 0.698  | 0.718  |
| MARCKs S512, | 0.742  | 0.794 | 0.818  | 0.784  | 0.805  |
|              | 0.716  | 0.862 | 0.7773 | 0.43   | 0.317  |
|              | 0.735  | 0.759 | 0.777  | 0.747  | 0.67   |
|              | 0.671  | 0.828 | 0.737  | 0.666  | 0.613  |
| CAMI S81     | 0.905  | 0.813 | 0.746  | 0.539  | 0.612  |
|              | 0.524  | 0.813 | 0.484  | 0.5647 | 0.6067 |
|              | 0.69   | 0.67  | 0.595  | 0.607  | 0.633  |
|              | 0.66   | 0.639 | 0.586  | 0.548  | 0.575  |
| RSK3 T356/S3 | 0.568  | 0.604 | 0.577  | 0.648  | 0.736  |
|              | 0.5477 | 0.581 | 0.454  | 0.419  | 0.457  |
|              | 0.552  | 0.561 | 0.54   | 0.615  | 0.687  |
|              | 0.523  | 0.563 | 0.516  | 0.576  | 0.627  |

|              |        |       |       |        |        |
|--------------|--------|-------|-------|--------|--------|
| RAF S289/S29 | 0.197  | 0.208 | 0.205 | 0.214  | 0.234  |
|              | 0.198  | 0.214 | 0.172 | 0.162  | 0.156  |
|              | 0.204  | 0.199 | 0.19  | 0.2    | 0.207  |
|              | 0.193  | 0.194 | 0.19  | 0.194  | 0.196  |
| MEK S217/S2  | 0.17   | 0.189 | 0.29  | 0.714  | 1.128  |
|              | 0.1707 | 0.191 | 0.174 | 0.255  | 0.354  |
|              | 0.169  | 0.172 | 0.242 | 0.605  | 0.841  |
|              | 0.173  | 0.178 | 0.255 | 0.597  | 0.737  |
| ERK T202/Y20 | 0.396  | 0.447 | 0.578 | 1.109  | 1.34   |
|              | 0.38   | 0.45  | 0.412 | 0.544  | 0.772  |
|              | 0.471  | 0.381 | 0.491 | 0.972  | 1.089  |
|              | 0.391  | 0.387 | 0.527 | 0.997  | 1.266  |
| p90RSK S380  | 0.242  | 0.354 | 0.39  | 0.382  | 0.536  |
|              | 0.326  | 0.29  | 0.454 | 0.456  | 0.584  |
|              | 0.583  | 0.432 | 0.28  | 0.257  | 0.409  |
|              | 0.799  | 0.322 | 0.257 | 0.256  | 0.42   |
| STAT1 Y701   | 0.411  | 0.412 | 0.451 | 0.464  | 0.492  |
|              | 0.381  | 0.431 | 0.411 | 0.4493 | 0.4763 |
|              | 0.445  | 0.422 | 0.444 | 0.441  | 0.475  |
|              | 0.439  | 0.432 | 0.439 | 0.443  | 0.462  |
| STAT3 Y705   | 0.619  | 0.656 | 0.624 | 0.593  | 0.585  |
|              | 0.57   | 0.665 | 0.629 | 0.506  | 0.5753 |
|              | 0.579  | 0.611 | 0.632 | 0.603  | 0.583  |
|              | 0.593  | 0.625 | 0.631 | 0.589  | 0.558  |
| CREB S133    | 0.575  | 0.572 | 0.676 | 0.755  | 1.022  |
|              | 0.58   | 0.664 | 0.468 | 0.398  | 0.471  |
|              | 0.58   | 0.586 | 0.701 | 0.816  | 0.99   |
|              | 0.585  | 0.74  | 0.699 | 0.83   | 0.893  |
| NF-kB S536   | 0.646  | 0.689 | 0.778 | 0.857  | 0.869  |
|              | 0.6743 | 0.695 | 0.645 | 0.635  | 0.615  |
|              | 0.681  | 0.669 | 0.762 | 0.849  | 0.845  |
|              | 0.696  | 0.705 | 0.773 | 0.812  | 0.81   |
| c-Jun S63    | 0.053  | 0.051 | 0.045 | 0.049  | 0.067  |
|              | 0.045  | 0.052 | 0.022 | 0.018  | 0.014  |
|              | 0.041  | 0.044 | 0.033 | 0.04   | 0.05   |
|              | 0.041  | 0.041 | 0.034 | 0.037  | 0.044  |

AKT2 sh10

|               |       |       |       |       |       |
|---------------|-------|-------|-------|-------|-------|
| PDGFRb Y771   | 0.225 | 0.298 | 0.258 | 0.257 | 0.217 |
|               | 0.268 | 0.31  | 0.271 | 0.254 | 0.224 |
|               | 0.272 | 0.3   | 0.271 | 0.283 | 0.269 |
|               | 0.273 | 0.307 | 0.29  | 0.288 | 0.271 |
| SHC Y317      | 0.339 | 0.444 | 0.405 | 0.448 | 0.388 |
|               | 0.393 | 0.472 | 0.434 | 0.448 | 0.401 |
|               | 0.424 | 0.491 | 0.503 | 0.542 | 0.525 |
|               | 0.423 | 0.504 | 0.525 | 0.558 | 0.546 |
| c-Cbl Y774    | 0.415 | 0.393 | 0.386 | 0.375 | 0.291 |
|               | 0.388 | 0.397 | 0.392 | 0.373 | 0.32  |
|               | 0.413 | 0.415 | 0.42  | 0.434 | 0.407 |
|               | 0.444 | 0.427 | 0.437 | 0.424 | 0.402 |
| Paxillin Y118 | 0.485 | 0.719 | 0.592 | 0.631 | 0.494 |
|               | 0.608 | 0.739 | 0.625 | 0.633 | 0.515 |
|               | 0.668 | 0.754 | 0.617 | 0.672 | 0.649 |
|               | 0.714 | 0.785 | 0.699 | 0.719 | 0.645 |
| AKT S473      | 0.078 | 0.215 | 0.187 | 0.234 | 0.155 |
|               | 0.193 | 0.179 | 0.235 | 0.202 | 0.173 |
|               | 0.266 | 0.313 | 0.227 | 0.256 | 0.311 |
|               | 0.28  | 0.264 | 0.306 | 0.267 | 0.3   |
| GSK-3a/b S21  | 0.055 | 0.279 | 0.182 | 0.235 | 0.144 |
|               | 0.206 | 0.163 | 0.238 | 0.208 | 0.152 |
|               | 0.281 | 0.307 | 0.26  | 0.242 | 0.272 |
|               | 0.307 | 0.273 | 0.225 | 0.287 | 0.287 |
| RPS6 S235/S2  | 0.148 | 0.068 | 0.134 | 0.213 | 0.23  |
|               | 0.136 | 0.066 | 0.15  | 0.236 | 0.233 |
|               | 0.142 | 0.088 | 0.085 | 0.171 | 0.366 |
|               | 0.119 | 0.077 | 0.11  | 0.197 | 0.391 |
| RPS6 S240/S2  | 0.136 | 0.054 | 0.126 | 0.149 | 0.205 |
|               | 0.109 | 0.053 | 0.134 | 0.164 | 0.257 |
|               | 0.115 | 0.071 | 0.073 | 0.122 | 0.185 |
|               | 0.091 | 0.063 | 0.095 | 0.134 | 0.201 |
| PKCb S660     | 0.558 | 0.596 | 0.482 | 0.723 | 0.634 |
|               | 0.505 | 0.576 | 0.504 | 0.731 | 0.676 |
|               | 0.576 | 0.627 | 0.536 | 0.902 | 1.045 |
|               | 0.593 | 0.617 | 0.587 | 0.941 | 1.05  |
| PKCd S643     | 0.626 | 0.627 | 0.53  | 0.608 | 0.517 |
|               | 0.605 | 0.655 | 0.569 | 0.603 | 0.534 |
|               | 0.629 | 0.649 | 0.588 | 0.668 | 0.619 |
|               | 0.644 | 0.651 | 0.601 | 0.666 | 0.627 |

|              |       |        |       |       |       |
|--------------|-------|--------|-------|-------|-------|
| MARCKs S512, | 0.368 | 0.793  | 0.535 | 0.527 | 0.397 |
|              | 0.549 | 0.809  | 0.606 | 0.488 | 0.407 |
|              | 0.645 | 0.783  | 0.68  | 0.716 | 0.659 |
|              | 0.681 | 0.811  | 0.771 | 0.736 | 0.647 |
| CAMI S81     | 0.53  | 0.497  | 0.479 | 0.452 | 0.323 |
|              | 0.507 | 0.51   | 0.438 | 0.454 | 0.366 |
|              | 0.521 | 0.573  | 0.515 | 0.538 | 0.559 |
|              | 0.562 | 0.513  | 0.626 | 0.59  | 0.443 |
| RSK3 T356/S3 | 0.476 | 0.582  | 0.523 | 0.615 | 0.547 |
|              | 0.531 | 0.628  | 0.546 | 0.636 | 0.59  |
|              | 0.578 | 0.621  | 0.566 | 0.741 | 0.789 |
|              | 0.581 | 0.624  | 0.593 | 0.76  | 0.779 |
| RAF S289/S29 | 0.149 | 0.205  | 0.161 | 0.167 | 0.133 |
|              | 0.18  | 0.213  | 0.183 | 0.175 | 0.141 |
|              | 0.193 | 0.212  | 0.171 | 0.195 | 0.186 |
|              | 0.197 | 0.219  | 0.201 | 0.202 | 0.185 |
| MEK S217/S2  | 0.13  | 0.173  | 0.205 | 0.435 | 0.426 |
|              | 0.153 | 0.186  | 0.234 | 0.429 | 0.461 |
|              | 0.169 | 0.191  | 0.231 | 0.692 | 0.814 |
|              | 0.189 | 0.2    | 0.285 | 0.786 | 0.837 |
| ERK T202/Y20 | 0.318 | 0.386  | 0.385 | 0.632 | 0.502 |
|              | 0.311 | 0.395  | 0.409 | 0.644 | 0.551 |
|              | 0.375 | 0.408  | 0.387 | 0.816 | 0.913 |
|              | 0.363 | 0.418  | 0.468 | 0.909 | 0.952 |
| p90RSK S380  | 0.773 | 0.2283 | 0.301 | 0.226 | 0.462 |
|              | 0.685 | 0.192  | 0.279 | 0.263 | 0.478 |
|              | 0.308 | 0.238  | 0.305 | 0.244 | 0.562 |
|              | 0.27  | 0.255  | 0.273 | 0.27  | 0.634 |
| STAT1 Y701   | 0.367 | 0.384  | 0.365 | 0.389 | 0.342 |
|              | 0.355 | 0.399  | 0.371 | 0.396 | 0.355 |
|              | 0.373 | 0.394  | 0.392 | 0.427 | 0.437 |
|              | 0.373 | 0.4    | 0.405 | 0.438 | 0.446 |
| STAT3 Y705   | 0.477 | 0.548  | 0.513 | 0.545 | 0.472 |
|              | 0.531 | 0.569  | 0.514 | 0.549 | 0.505 |
|              | 0.534 | 0.576  | 0.547 | 0.584 | 0.552 |
|              | 0.551 | 0.576  | 0.55  | 0.594 | 0.544 |
| CREB S133    | 0.408 | 0.563  | 0.525 | 0.613 | 0.433 |
|              | 0.554 | 0.689  | 0.609 | 0.623 | 0.479 |
|              | 0.629 | 0.61   | 0.639 | 0.769 | 0.89  |

|               |           |       |       |       |        |
|---------------|-----------|-------|-------|-------|--------|
|               | 0.671     | 0.727 | 0.735 | 0.923 | 0.903  |
| NF-kB S536    | 0.637     | 0.674 | 0.645 | 0.681 | 0.589  |
|               | 0.598     | 0.661 | 0.628 | 0.681 | 0.608  |
|               | 0.65      | 0.679 | 0.612 | 0.779 | 0.759  |
|               | 0.663     | 0.677 | 0.695 | 0.788 | 0.754  |
| c-Jun S63     | 0.018     | 0.047 | 0.03  | 0.028 | 0.016  |
|               | 0.033     | 0.055 | 0.035 | 0.028 | 0.02   |
|               | 0.043     | 0.057 | 0.031 | 0.043 | 0.048  |
|               | 0.046     | 0.057 | 0.055 | 0.054 | 0.046  |
|               | AKT2 sh12 |       |       |       |        |
| PDGFRb Y771   | 0.254     | 0.3   | 0.26  | 0.261 | 0.2623 |
|               | 0.254     | 0.292 | 0.251 | 0.264 | 0.228  |
|               | 0.281     | 0.283 | 0.282 | 0.294 | 0.283  |
|               | 0.281     | 0.291 | 0.297 | 0.294 | 0.276  |
| SHC Y317      | 0.378     | 0.537 | 0.45  | 0.437 | 0.384  |
|               | 0.384     | 0.54  | 0.414 | 0.455 | 0.41   |
|               | 0.421     | 0.527 | 0.509 | 0.477 | 0.516  |
|               | 0.414     | 0.549 | 0.534 | 0.539 | 0.504  |
| c-Cbl Y774    | 0.343     | 0.384 | 0.347 | 0.324 | 0.276  |
|               | 0.341     | 0.389 | 0.326 | 0.328 | 0.29   |
|               | 0.396     | 0.405 | 0.404 | 0.402 | 0.392  |
|               | 0.399     | 0.412 | 0.414 | 0.401 | 0.385  |
| Paxillin Y118 | 0.61      | 0.716 | 0.614 | 0.579 | 0.465  |
|               | 0.625     | 0.701 | 0.583 | 0.594 | 0.491  |
|               | 0.719     | 0.73  | 0.72  | 0.706 | 0.685  |
|               | 0.737     | 0.747 | 0.715 | 0.676 | 0.664  |
| AKT S473      | 0.153     | 0.195 | 0.181 | 0.185 | 0.116  |
|               | 0.143     | 0.182 | 0.125 | 0.186 | 0.143  |
|               | 0.268     | 0.325 | 0.26  | 0.248 | 0.276  |
|               | 0.287     | 0.282 | 0.262 | 0.254 | 0.314  |
| GSK-3a/b S21  | 0.151     | 0.232 | 0.206 | 0.208 | 0.106  |
|               | 0.165     | 0.224 | 0.135 | 0.217 | 0.143  |
|               | 0.322     | 0.265 | 0.311 | 0.281 | 0.424  |
|               | 0.353     | 0.276 | 0.357 | 0.286 | 0.311  |
| RPS6 S235/S2  | 0.094     | 0.07  | 0.083 | 0.118 | 0.154  |
|               | 0.072     | 0.062 | 0.088 | 0.119 | 0.167  |
|               | 0.111     | 0.095 | 0.085 | 0.149 | 0.284  |

|              |       |       |       |       |       |
|--------------|-------|-------|-------|-------|-------|
|              | 0.096 | 0.083 | 0.094 | 0.171 | 0.316 |
| RPS6 S240/S2 | 0.085 | 0.07  | 0.087 | 0.122 | 0.116 |
|              | 0.067 | 0.061 | 0.1   | 0.121 | 0.129 |
|              | 0.097 | 0.093 | 0.076 | 0.123 | 0.128 |
|              | 0.09  | 0.078 | 0.084 | 0.133 | 0.14  |
| PKCb S660    | 0.465 | 0.61  | 0.552 | 0.655 | 0.615 |
|              | 0.468 | 0.592 | 0.515 | 0.694 | 0.638 |
|              | 0.539 | 0.594 | 0.592 | 0.845 | 0.989 |
|              | 0.548 | 0.602 | 0.606 | 0.875 | 1.044 |
| PKCd S643    | 0.582 | 0.711 | 0.603 | 0.62  | 0.537 |
|              | 0.595 | 0.711 | 0.582 | 0.644 | 0.557 |
|              | 0.67  | 0.684 | 0.669 | 0.686 | 0.651 |
|              | 0.676 | 0.676 | 0.689 | 0.718 | 0.65  |
| MARCKs S512, | 0.496 | 0.793 | 0.516 | 0.474 | 0.33  |
|              | 0.459 | 0.77  | 0.449 | 0.461 | 0.343 |
|              | 0.655 | 0.751 | 0.688 | 0.688 | 0.568 |
|              | 0.674 | 0.781 | 0.723 | 0.684 | 0.552 |
| CAMI S81     | 0.48  | 0.5   | 0.43  | 0.405 | 0.325 |
|              | 0.417 | 0.499 | 0.392 | 0.441 | 0.351 |
|              | 0.517 | 0.444 | 0.517 | 0.45  | 0.432 |
|              | 0.444 | 0.462 | 0.448 | 0.432 | 0.42  |
| RSK3 T356/S3 | 0.481 | 0.603 | 0.485 | 0.485 | 0.46  |
|              | 0.466 | 0.576 | 0.462 | 0.509 | 0.484 |
|              | 0.555 | 0.594 | 0.559 | 0.626 | 0.686 |
|              | 0.559 | 0.593 | 0.592 | 0.648 | 0.695 |
| RAF S289/S29 | 0.154 | 0.194 | 0.164 | 0.161 | 0.14  |
|              | 0.155 | 0.194 | 0.159 | 0.161 | 0.148 |
|              | 0.188 | 0.206 | 0.192 | 0.198 | 0.208 |
|              | 0.193 | 0.2   | 0.198 | 0.2   | 0.209 |
| MEK S217/S2  | 0.141 | 0.177 | 0.211 | 0.431 | 0.357 |
|              | 0.134 | 0.176 | 0.19  | 0.472 | 0.391 |
|              | 0.162 | 0.188 | 0.272 | 0.69  | 0.82  |
|              | 0.181 | 0.202 | 0.3   | 0.739 | 0.789 |
| ERK T202/Y20 | 0.392 | 0.355 | 0.443 | 0.566 | 0.543 |
|              | 0.368 | 0.36  | 0.399 | 0.65  | 0.609 |
|              | 0.358 | 0.365 | 0.483 | 0.729 | 0.893 |
|              | 0.354 | 0.385 | 0.516 | 0.961 | 0.879 |
| p90RSK S380  | 0.796 | 0.17  | 0.289 | 0.235 | 0.4   |
|              | 0.72  | 0.158 | 0.311 | 0.214 | 0.441 |

|               |           |       |       |        |        |
|---------------|-----------|-------|-------|--------|--------|
|               | 0.284     | 0.208 | 0.272 | 0.2383 | 0.513  |
|               | 0.25      | 0.214 | 0.271 | 0.266  | 0.578  |
| STAT1 Y701    | 0.329     | 0.42  | 0.362 | 0.372  | 0.353  |
|               | 0.339     | 0.422 | 0.359 | 0.385  | 0.355  |
|               | 0.373     | 0.409 | 0.402 | 0.418  | 0.44   |
|               | 0.379     | 0.412 | 0.419 | 0.424  | 0.445  |
| STAT3 Y705    | 0.528     | 0.594 | 0.563 | 0.533  | 0.466  |
|               | 0.541     | 0.586 | 0.52  | 0.538  | 0.479  |
|               | 0.559     | 0.589 | 0.569 | 0.568  | 0.542  |
|               | 0.57      | 0.595 | 0.576 | 0.569  | 0.545  |
| CREB S133     | 0.448     | 0.618 | 0.545 | 0.613  | 0.48   |
|               | 0.467     | 0.732 | 0.489 | 0.662  | 0.506  |
|               | 0.593     | 0.582 | 0.686 | 0.813  | 0.892  |
|               | 0.615     | 0.691 | 0.724 | 0.88   | 0.901  |
| NF-kB S536    | 0.59      | 0.697 | 0.634 | 0.723  | 0.679  |
|               | 0.589     | 0.69  | 0.624 | 0.747  | 0.698  |
|               | 0.692     | 0.72  | 0.738 | 0.926  | 1.006  |
|               | 0.705     | 0.746 | 0.76  | 0.94   | 1.002  |
| c-Jun S63     | 0.024     | 0.044 | 0.025 | 0.024  | 0.017  |
|               | 0.022     | 0.047 | 0.026 | 0.025  | 0.019  |
|               | 0.037     | 0.057 | 0.037 | 0.045  | 0.048  |
|               | 0.042     | 0.062 | 0.048 | 0.046  | 0.046  |
|               | AKT3 sh07 |       |       |        |        |
| PDGFRb Y771   | 0.272     | 0.277 | 0.24  | 0.251  | 0.2813 |
|               | 0.267     | 0.276 | 0.259 | 0.284  | 0.276  |
|               | 0.276     | 0.283 | 0.272 | 0.29   | 0.284  |
|               | 0.273     | 0.285 | 0.284 | 0.291  | 0.284  |
| SHC Y317      | 0.333     | 0.454 | 0.435 | 0.419  | 0.5067 |
|               | 0.375     | 0.482 | 0.491 | 0.518  | 0.508  |
|               | 0.391     | 0.471 | 0.496 | 0.488  | 0.505  |
|               | 0.398     | 0.471 | 0.499 | 0.506  | 0.507  |
| c-Cbl Y774    | 0.3823    | 0.395 | 0.374 | 0.365  | 0.3983 |
|               | 0.387     | 0.394 | 0.379 | 0.39   | 0.405  |
|               | 0.377     | 0.39  | 0.381 | 0.383  | 0.39   |
|               | 0.383     | 0.397 | 0.38  | 0.371  | 0.4    |
| Paxillin Y118 | 0.6773    | 0.681 | 0.589 | 0.586  | 0.533  |
|               | 0.691     | 0.744 | 0.691 | 0.703  | 0.734  |

|              |        |       |       |       |        |
|--------------|--------|-------|-------|-------|--------|
|              | 0.628  | 0.705 | 0.614 | 0.664 | 0.695  |
|              | 0.713  | 0.709 | 0.679 | 0.662 | 0.71   |
| AKT S473     | 0.257  | 0.234 | 0.273 | 0.273 | 0.3007 |
|              | 0.257  | 0.246 | 0.242 | 0.262 | 0.317  |
|              | 0.287  | 0.277 | 0.243 | 0.24  | 0.323  |
|              | 0.227  | 0.248 | 0.246 | 0.289 | 0.262  |
| GSK-3a/b S21 | 0.169  | 0.264 | 0.239 | 0.267 | 0.2767 |
|              | 0.304  | 0.275 | 0.263 | 0.311 | 0.311  |
|              | 0.237  | 0.211 | 0.277 | 0.26  | 0.242  |
|              | 0.255  | 0.242 | 0.26  | 0.277 | 0.277  |
| RPS6 S235/S2 | 0.161  | 0.067 | 0.119 | 0.154 | 0.225  |
|              | 0.087  | 0.073 | 0.099 | 0.16  | 0.338  |
|              | 0.12   | 0.073 | 0.086 | 0.16  | 0.319  |
|              | 0.102  | 0.076 | 0.103 | 0.148 | 0.328  |
| RPS6 S240/S2 | 0.085  | 0.051 | 0.116 | 0.141 | 0.183  |
|              | 0.07   | 0.06  | 0.09  | 0.114 | 0.178  |
|              | 0.098  | 0.057 | 0.073 | 0.107 | 0.136  |
|              | 0.087  | 0.066 | 0.091 | 0.13  | 0.145  |
| PKCb S660    | 0.5437 | 0.517 | 0.503 | 0.565 | 0.532  |
|              | 0.542  | 0.528 | 0.521 | 0.7   | 0.817  |
|              | 0.536  | 0.555 | 0.554 | 0.755 | 0.922  |
|              | 0.553  | 0.546 | 0.571 | 0.793 | 0.936  |
| PKCd S643    | 0.634  | 0.636 | 0.578 | 0.56  | 0.519  |
|              | 0.624  | 0.629 | 0.607 | 0.616 | 0.619  |
|              | 0.638  | 0.65  | 0.636 | 0.635 | 0.609  |
|              | 0.64   | 0.644 | 0.631 | 0.631 | 0.646  |
| MARCKs S512, | 0.659  | 0.768 | 0.723 | 0.539 | 0.5913 |
|              | 0.66   | 0.79  | 0.714 | 0.709 | 0.581  |
|              | 0.644  | 0.74  | 0.686 | 0.725 | 0.582  |
|              | 0.673  | 0.738 | 0.769 | 0.707 | 0.611  |
| CAMI S81     | 0.5153 | 0.494 | 0.393 | 0.422 | 0.312  |
|              | 0.502  | 0.562 | 0.48  | 0.51  | 0.522  |
|              | 0.502  | 0.529 | 0.473 | 0.55  | 0.503  |
|              | 0.542  | 0.565 | 0.543 | 0.546 | 0.572  |
| RSK3 T356/S3 | 0.517  | 0.522 | 0.505 | 0.558 | 0.479  |
|              | 0.562  | 0.523 | 0.551 | 0.72  | 0.784  |
|              | 0.543  | 0.509 | 0.53  | 0.628 | 0.707  |
|              | 0.546  | 0.553 | 0.591 | 0.698 | 0.779  |
| RAF S289/S29 | 0.1733 | 0.187 | 0.187 | 0.174 | 0.143  |



|               |        |       |       |       |        |
|---------------|--------|-------|-------|-------|--------|
|               | 0.3    | 0.316 | 0.294 | 0.28  | 0.275  |
|               | 0.276  | 0.29  | 0.28  | 0.296 | 0.304  |
|               | 0.309  | 0.3   | 0.305 | 0.314 | 0.311  |
| SHC Y317      | 0.372  | 0.515 | 0.442 | 0.488 | 0.5317 |
|               | 0.446  | 0.538 | 0.53  | 0.544 | 0.543  |
|               | 0.419  | 0.497 | 0.491 | 0.53  | 0.526  |
|               | 0.472  | 0.532 | 0.554 | 0.547 | 0.526  |
| c-Cbl Y774    | 0.4037 | 0.418 | 0.374 | 0.376 | 0.3693 |
|               | 0.398  | 0.407 | 0.395 | 0.379 | 0.365  |
|               | 0.4    | 0.412 | 0.392 | 0.403 | 0.37   |
|               | 0.413  | 0.416 | 0.406 | 0.41  | 0.373  |
| Paxillin Y118 | 0.6963 | 0.734 | 0.64  | 0.621 | 0.6643 |
|               | 0.705  | 0.74  | 0.713 | 0.689 | 0.658  |
|               | 0.662  | 0.743 | 0.655 | 0.721 | 0.662  |
|               | 0.722  | 0.756 | 0.749 | 0.724 | 0.673  |
| AKT S473      | 0.232  | 0.286 | 0.191 | 0.267 | 0.2607 |
|               | 0.249  | 0.21  | 0.277 | 0.252 | 0.285  |
|               | 0.237  | 0.232 | 0.197 | 0.293 | 0.252  |
|               | 0.21   | 0.227 | 0.248 | 0.229 | 0.245  |
| GSK-3a/b S21  | 0.258  | 0.272 | 0.219 | 0.268 | 0.257  |
|               | 0.259  | 0.252 | 0.22  | 0.281 | 0.246  |
|               | 0.255  | 0.254 | 0.267 | 0.234 | 0.276  |
|               | 0.26   | 0.29  | 0.213 | 0.261 | 0.249  |
| RPS6 S235/S2  | 0.099  | 0.058 | 0.078 | 0.121 | 0.162  |
|               | 0.062  | 0.057 | 0.07  | 0.129 | 0.279  |
|               | 0.099  | 0.068 | 0.067 | 0.134 | 0.318  |
|               | 0.078  | 0.068 | 0.075 | 0.155 | 0.295  |
| RPS6 S240/S2  | 0.093  | 0.047 | 0.079 | 0.096 | 0.133  |
|               | 0.053  | 0.047 | 0.059 | 0.091 | 0.141  |
|               | 0.082  | 0.053 | 0.056 | 0.085 | 0.131  |
|               | 0.065  | 0.054 | 0.062 | 0.094 | 0.133  |
| PKCb S660     | 0.579  | 0.589 | 0.535 | 0.712 | 0.624  |
|               | 0.569  | 0.583 | 0.576 | 0.762 | 1.007  |
|               | 0.575  | 0.601 | 0.581 | 0.875 | 1.063  |
|               | 0.593  | 0.595 | 0.599 | 0.938 | 1.05   |
| PKCd S643     | 0.659  | 0.644 | 0.581 | 0.609 | 0.561  |
|               | 0.658  | 0.696 | 0.645 | 0.649 | 0.657  |
|               | 0.654  | 0.652 | 0.615 | 0.676 | 0.687  |
|               | 0.665  | 0.682 | 0.67  | 0.671 | 0.69   |

|              |        |       |        |       |        |
|--------------|--------|-------|--------|-------|--------|
| MARCKs S512, | 0.6543 | 0.699 | 0.546  | 0.549 | 0.5657 |
|              | 0.682  | 0.72  | 0.709  | 0.572 | 0.538  |
|              | 0.639  | 0.694 | 0.638  | 0.621 | 0.576  |
|              | 0.642  | 0.699 | 0.692  | 0.641 | 0.583  |
| CAMI S81     | 0.537  | 0.496 | 0.467  | 0.509 | 0.375  |
|              | 0.496  | 0.514 | 0.498  | 0.423 | 0.497  |
|              | 0.551  | 0.539 | 0.494  | 0.508 | 0.532  |
|              | 0.564  | 0.573 | 0.575  | 0.527 | 0.561  |
| RSK3 T356/S3 | 0.553  | 0.58  | 0.544  | 0.62  | 0.533  |
|              | 0.546  | 0.58  | 0.576  | 0.646 | 0.743  |
|              | 0.553  | 0.571 | 0.544  | 0.683 | 0.778  |
|              | 0.56   | 0.573 | 0.568  | 0.731 | 0.836  |
| RAF S289/S29 | 0.1923 | 0.192 | 0.1917 | 0.197 | 0.1897 |
|              | 0.191  | 0.197 | 0.19   | 0.198 | 0.189  |
|              | 0.191  | 0.192 | 0.186  | 0.207 | 0.188  |
|              | 0.195  | 0.2   | 0.199  | 0.208 | 0.192  |
| MEK S217/S2  | 0.1677 | 0.17  | 0.193  | 0.429 | 0.358  |
|              | 0.169  | 0.183 | 0.269  | 0.495 | 0.769  |
|              | 0.158  | 0.182 | 0.231  | 0.661 | 0.749  |
|              | 0.176  | 0.177 | 0.249  | 0.718 | 0.806  |
| ERK T202/Y20 | 0.3657 | 0.353 | 0.4    | 0.77  | 0.623  |
|              | 0.362  | 0.371 | 0.476  | 0.84  | 0.978  |
|              | 0.374  | 0.357 | 0.424  | 0.759 | 0.906  |
|              | 0.361  | 0.357 | 0.456  | 0.83  | 0.961  |
| p90RSK S380  | 0.929  | 0.16  | 0.277  | 0.228 | 0.461  |
|              | 0.508  | 0.227 | 0.235  | 0.268 | 0.452  |
|              | 0.705  | 0.243 | 0.274  | 0.263 | 0.595  |
|              | 0.276  | 0.288 | 0.246  | 0.287 | 0.654  |
| STAT1 Y701   | 0.3803 | 0.371 | 0.382  | 0.379 | 0.326  |
|              | 0.37   | 0.383 | 0.398  | 0.389 | 0.409  |
|              | 0.377  | 0.388 | 0.405  | 0.415 | 0.429  |
|              | 0.394  | 0.397 | 0.422  | 0.42  | 0.44   |
| STAT3 Y705   | 0.5953 | 0.571 | 0.505  | 0.531 | 0.487  |
|              | 0.58   | 0.564 | 0.548  | 0.565 | 0.548  |
|              | 0.588  | 0.588 | 0.56   | 0.592 | 0.585  |
|              | 0.618  | 0.587 | 0.574  | 0.589 | 0.582  |
| CREB S133    | 0.6177 | 0.633 | 0.565  | 0.751 | 0.531  |
|              | 0.633  | 0.709 | 0.784  | 0.824 | 0.939  |
|              | 0.603  | 0.672 | 0.716  | 0.907 | 0.978  |
|              | 0.617  | 0.681 | 0.774  | 0.968 | 1.052  |

|               |          |       |       |       |        |
|---------------|----------|-------|-------|-------|--------|
| NF-kB S536    | 0.6233   | 0.637 | 0.558 | 0.686 | 0.529  |
|               | 0.602    | 0.623 | 0.628 | 0.681 | 0.637  |
|               | 0.634    | 0.652 | 0.636 | 0.771 | 0.713  |
|               | 0.634    | 0.639 | 0.658 | 0.794 | 0.693  |
| c-Jun S63     | 0.0433   | 0.045 | 0.032 | 0.036 | 0.02   |
|               | 0.042    | 0.055 | 0.047 | 0.04  | 0.048  |
|               | 0.042    | 0.048 | 0.036 | 0.046 | 0.049  |
|               | 0.046    | 0.051 | 0.048 | 0.054 | 0.066  |
|               | AKT pool |       |       |       |        |
| PDGFRb Y771   | 0.316    | 0.291 | 0.293 | 0.304 | 0.338  |
|               | 0.312    | 0.293 | 0.319 | 0.299 | 0.313  |
|               | 0.328    | 0.326 | 0.356 | 0.342 | 0.362  |
|               | 0.295    | 0.311 | 0.336 | 0.297 | 0.338  |
| SHC Y317      | 0.489    | 0.509 | 0.517 | 0.534 | 0.623  |
|               | 0.492    | 0.523 | 0.584 | 0.536 | 0.616  |
|               | 0.527    | 0.543 | 0.605 | 0.573 | 0.66   |
|               | 0.508    | 0.525 | 0.573 | 0.537 | 0.609  |
| c-Cbl Y774    | 0.398    | 0.387 | 0.37  | 0.38  | 0.387  |
|               | 0.447    | 0.43  | 0.426 | 0.403 | 0.433  |
|               | 0.421    | 0.416 | 0.418 | 0.383 | 0.442  |
|               | 0.481    | 0.443 | 0.438 | 0.437 | 0.457  |
| Paxillin Y118 | 0.607    | 0.578 | 0.559 | 0.587 | 0.58   |
|               | 0.685    | 0.638 | 0.612 | 0.605 | 0.604  |
|               | 0.653    | 0.638 | 0.629 | 0.606 | 0.661  |
|               | 0.735    | 0.698 | 0.689 | 0.657 | 0.689  |
| AKT S473      | 0.184    | 0.198 | 0.169 | 0.211 | 0.169  |
|               | 0.263    | 0.262 | 0.239 | 0.273 | 0.292  |
|               | 0.197    | 0.211 | 0.247 | 0.222 | 0.347  |
|               | 0.318    | 0.299 | 0.385 | 0.311 | 0.408  |
| GSK-3a/b S21  | 0.246    | 0.208 | 0.167 | 0.218 | 0.198  |
|               | 0.231    | 0.31  | 0.332 | 0.335 | 0.309  |
|               | 0.301    | 0.313 | 0.29  | 0.322 | 0.32   |
|               | 0.483    | 0.432 | 0.516 | 0.432 | 0.2757 |
| RPS6 S235/S2  | 0.093    | 0.113 | 0.114 | 0.127 | 0.188  |
|               | 0.103    | 0.12  | 0.131 | 0.162 | 0.218  |
|               | 0.105    | 0.115 | 0.109 | 0.109 | 0.22   |
|               | 0.125    | 0.131 | 0.156 | 0.145 | 0.254  |

|              |        |       |       |       |       |
|--------------|--------|-------|-------|-------|-------|
| RPS6 S240/S2 | 0.069  | 0.093 | 0.126 | 0.109 | 0.094 |
|              | 0.086  | 0.099 | 0.13  | 0.134 | 0.139 |
|              | 0.071  | 0.071 | 0.094 | 0.071 | 0.091 |
|              | 0.085  | 0.085 | 0.126 | 0.111 | 0.137 |
| PKCb S660    | 0.613  | 0.613 | 0.605 | 0.797 | 1.026 |
|              | 0.638  | 0.596 | 0.633 | 0.781 | 0.93  |
|              | 0.631  | 0.655 | 0.786 | 0.903 | 1.078 |
|              | 0.625  | 0.576 | 0.653 | 0.796 | 0.912 |
| PKCd S643    | 0.828  | 0.766 | 0.717 | 0.79  | 0.782 |
|              | 0.778  | 0.741 | 0.738 | 0.75  | 0.742 |
|              | 0.763  | 0.734 | 0.779 | 0.775 | 0.783 |
|              | 0.8    | 0.736 | 0.752 | 0.732 | 0.772 |
| MARCKs S512, | 0.64   | 0.643 | 0.6   | 0.586 | 0.67  |
|              | 0.696  | 0.696 | 0.682 | 0.591 | 0.67  |
|              | 0.626  | 0.723 | 0.746 | 0.628 | 0.726 |
|              | 0.724  | 0.739 | 0.809 | 0.638 | 0.708 |
| CAMI S81     | 0.578  | 0.505 | 0.482 | 0.516 | 0.545 |
|              | 0.544  | 0.489 | 0.495 | 0.45  | 0.478 |
|              | 0.561  | 0.517 | 0.539 | 0.512 | 0.585 |
|              | 0.505  | 0.468 | 0.478 | 0.468 | 0.484 |
| RSK3 T356/S3 | 0.448  | 0.503 | 0.525 | 0.564 | 0.789 |
|              | 0.512  | 0.568 | 0.622 | 0.627 | 0.806 |
|              | 0.514  | 0.544 | 0.652 | 0.638 | 0.858 |
|              | 0.571  | 0.609 | 0.703 | 0.694 | 0.863 |
| RAF S289/S29 | 0.171  | 0.17  | 0.157 | 0.179 | 0.183 |
|              | 0.179  | 0.177 | 0.173 | 0.173 | 0.182 |
|              | 0.18   | 0.184 | 0.188 | 0.191 | 0.203 |
|              | 0.1767 | 0.189 | 0.208 | 0.206 | 0.216 |
| MEK S217/S2: | 0.164  | 0.174 | 0.294 | 0.372 | 1.012 |
|              | 0.183  | 0.207 | 0.421 | 0.461 | 1.042 |
|              | 0.17   | 0.182 | 0.406 | 0.583 | 1.212 |
|              | 0.2    | 0.204 | 0.493 | 0.605 | 1.294 |
| ERK T202/Y20 | 0.374  | 0.381 | 0.507 | 0.643 | 0.836 |
|              | 0.425  | 0.446 | 0.643 | 0.774 | 1.084 |
|              | 0.358  | 0.368 | 0.688 | 0.769 | 0.963 |
|              | 0.411  | 0.409 | 0.727 | 0.856 | 1.03  |
| p90RSK S380  | 0.2953 | 0.311 | 0.284 | 0.295 | 0.364 |
|              | 0.351  | 0.326 | 0.309 | 0.396 | 0.44  |
|              | 0.247  | 0.244 | 0.313 | 0.305 | 0.549 |

|               |            |       |        |       |       |
|---------------|------------|-------|--------|-------|-------|
|               | 0.288      | 0.284 | 0.358  | 0.445 | 0.564 |
| STAT1 Y701    | 0.459      | 0.398 | 0.409  | 0.419 | 0.501 |
|               | 0.426      | 0.398 | 0.432  | 0.412 | 0.47  |
|               | 0.443      | 0.423 | 0.464  | 0.442 | 0.496 |
|               | 0.423      | 0.413 | 0.455  | 0.412 | 0.464 |
| STAT3 Y705    | 0.599      | 0.629 | 0.601  | 0.599 | 0.638 |
|               | 0.605      | 0.644 | 0.603  | 0.571 | 0.64  |
|               | 0.65       | 0.665 | 0.693  | 0.619 | 0.697 |
|               | 0.598      | 0.644 | 0.636  | 0.575 | 0.646 |
| CREB S133     | 0.829      | 0.644 | 0.779  | 0.881 | 1.119 |
|               | 0.814      | 0.662 | 0.792  | 0.869 | 1.04  |
|               | 0.865      | 0.819 | 0.953  | 0.984 | 1.253 |
|               | 0.766      | 0.651 | 0.759  | 0.821 | 0.994 |
| NF-kB S536    | 0.672      | 0.711 | 0.693  | 0.719 | 0.849 |
|               | 0.745      | 0.782 | 0.823  | 0.827 | 0.938 |
|               | 0.694      | 0.755 | 0.841  | 0.816 | 0.897 |
|               | 0.758      | 0.795 | 0.879  | 0.874 | 0.929 |
| c-Jun S63     | 0.037      | 0.041 | 0.037  | 0.041 | 0.053 |
|               | 0.048      | 0.051 | 0.054  | 0.05  | 0.049 |
|               | 0.046      | 0.055 | 0.057  | 0.055 | 0.066 |
|               | 0.058      | 0.066 | 0.062  | 0.064 | 0.087 |
|               | GSK3-A sh3 |       |        |       |       |
| PDGFRb Y771   | 0.323      | 0.33  | 0.3    | 0.317 | 0.294 |
|               | 0.322      | 0.338 | 0.327  | 0.345 | 0.278 |
|               | 0.319      | 0.319 | 0.314  | 0.333 | 0.29  |
|               | 0.316      | 0.311 | 0.315  | 0.338 | 0.303 |
| SHC Y317      | 0.411      | 0.506 | 0.506  | 0.541 | 0.538 |
|               | 0.441      | 0.525 | 0.509  | 0.537 | 0.481 |
|               | 0.462      | 0.509 | 0.514  | 0.548 | 0.52  |
|               | 0.457      | 0.49  | 0.512  | 0.548 | 0.535 |
| c-Cbl Y774    | 0.433      | 0.421 | 0.429  | 0.407 | 0.439 |
|               | 0.428      | 0.417 | 0.453  | 0.41  | 0.414 |
|               | 0.425      | 0.478 | 0.422  | 0.403 | 0.45  |
|               | 0.45       | 0.452 | 0.459  | 0.387 | 0.446 |
| Paxillin Y118 | 0.773      | 0.813 | 0.7827 | 0.756 | 0.72  |
|               | 0.781      | 0.82  | 0.788  | 0.784 | 0.666 |
|               | 0.778      | 0.793 | 0.773  | 0.822 | 0.704 |

|              |       |        |       |       |       |
|--------------|-------|--------|-------|-------|-------|
|              | 0.764 | 0.823  | 0.787 | 0.816 | 0.703 |
| AKT S473     | 0.49  | 0.509  | 0.452 | 0.57  | 0.62  |
|              | 0.449 | 0.505  | 0.491 | 0.533 | 0.503 |
|              | 0.477 | 0.552  | 0.485 | 0.597 | 0.596 |
|              | 0.456 | 0.529  | 0.489 | 0.592 | 0.589 |
| GSK-3a/b S21 | 0.133 | 0.135  | 0.116 | 0.137 | 0.143 |
|              | 0.139 | 0.136  | 0.134 | 0.123 | 0.102 |
|              | 0.136 | 0.1407 | 0.135 | 0.15  | 0.139 |
|              | 0.152 | 0.151  | 0.139 | 0.154 | 0.161 |
| RPS6 S235/S2 | 0.09  | 0.089  | 0.086 | 0.128 | 0.235 |
|              | 0.1   | 0.098  | 0.092 | 0.126 | 0.212 |
|              | 0.097 | 0.087  | 0.091 | 0.116 | 0.221 |
|              | 0.09  | 0.096  | 0.092 | 0.122 | 0.244 |
| RPS6 S240/S2 | 0.081 | 0.064  | 0.072 | 0.103 | 0.125 |
|              | 0.083 | 0.074  | 0.082 | 0.105 | 0.143 |
|              | 0.076 | 0.076  | 0.087 | 0.105 | 0.179 |
|              | 0.075 | 0.089  | 0.092 | 0.109 | 0.154 |
| PKCb S660    | 0.587 | 0.581  | 0.55  | 0.754 | 0.908 |
|              | 0.596 | 0.581  | 0.559 | 0.733 | 0.779 |
|              | 0.597 | 0.561  | 0.545 | 0.769 | 0.906 |
|              | 0.589 | 0.552  | 0.545 | 0.753 | 0.917 |
| PKCd S643    | 0.669 | 0.663  | 0.628 | 0.657 | 0.654 |
|              | 0.675 | 0.695  | 0.644 | 0.661 | 0.621 |
|              | 0.66  | 0.638  | 0.621 | 0.653 | 0.639 |
|              | 0.664 | 0.638  | 0.599 | 0.65  | 0.651 |
| MARCKs S512, | 0.625 | 0.703  | 0.575 | 0.606 | 0.521 |
|              | 0.61  | 0.704  | 0.673 | 0.597 | 0.45  |
|              | 0.595 | 0.67   | 0.607 | 0.644 | 0.506 |
|              | 0.62  | 0.667  | 0.615 | 0.639 | 0.547 |
| CAMI S81     | 0.669 | 0.656  | 0.582 | 0.592 | 0.593 |
|              | 0.66  | 0.65   | 0.657 | 0.62  | 0.551 |
|              | 0.707 | 0.66   | 0.686 | 0.681 | 0.631 |
|              | 0.732 | 0.674  | 0.671 | 0.665 | 0.689 |
| RSK3 T356/S3 | 0.585 | 0.589  | 0.56  | 0.632 | 0.636 |
|              | 0.599 | 0.593  | 0.589 | 0.641 | 0.583 |
|              | 0.602 | 0.629  | 0.603 | 0.706 | 0.7   |
|              | 0.633 | 0.647  | 0.602 | 0.693 | 0.699 |
| RAF S289/S29 | 0.176 | 0.174  | 0.17  | 0.173 | 0.172 |
|              | 0.175 | 0.175  | 0.171 | 0.173 | 0.16  |

|              |            |        |       |       |       |
|--------------|------------|--------|-------|-------|-------|
|              | 0.176      | 0.1745 | 0.168 | 0.185 | 0.183 |
|              | 0.188      | 0.1745 | 0.171 | 0.189 | 0.186 |
| MEK S217/S22 | 0.172      | 0.189  | 0.226 | 0.619 | 0.602 |
|              | 0.196      | 0.195  | 0.249 | 0.615 | 0.551 |
|              | 0.181      | 0.199  | 0.239 | 0.679 | 0.767 |
|              | 0.2        | 0.194  | 0.231 | 0.67  | 0.64  |
| ERK T202/Y20 | 0.4573     | 0.472  | 0.457 | 0.793 | 0.991 |
|              | 0.46       | 0.432  | 0.505 | 0.818 | 0.879 |
|              | 0.474      | 0.431  | 0.457 | 0.846 | 1.019 |
|              | 0.438      | 0.44   | 0.469 | 0.85  | 1.046 |
| p90RSK S380  | 0.414      | 0.209  | 0.229 | 0.19  | 0.345 |
|              | 0.398      | 0.218  | 0.207 | 0.208 | 0.395 |
|              | 0.34       | 0.215  | 0.218 | 0.199 | 0.369 |
|              | 0.436      | 0.223  | 0.218 | 0.216 | 0.383 |
| STAT1 Y701   | 0.394      | 0.411  | 0.418 | 0.428 | 0.474 |
|              | 0.405      | 0.423  | 0.432 | 0.443 | 0.416 |
|              | 0.399      | 0.404  | 0.426 | 0.441 | 0.434 |
|              | 0.405      | 0.4    | 0.411 | 0.432 | 0.477 |
| STAT3 Y705   | 0.612      | 0.661  | 0.576 | 0.583 | 0.617 |
|              | 0.589      | 0.6267 | 0.589 | 0.611 | 0.605 |
|              | 0.625      | 0.606  | 0.584 | 0.608 | 0.617 |
|              | 0.596      | 0.613  | 0.576 | 0.602 | 0.627 |
| CREB S133    | 0.591      | 0.543  | 0.601 | 0.613 | 0.69  |
|              | 0.593      | 0.601  | 0.648 | 0.666 | 0.612 |
|              | 0.607      | 0.549  | 0.643 | 0.706 | 0.723 |
|              | 0.64       | 0.59   | 0.654 | 0.672 | 0.789 |
| NF-kB S536   | 0.59       | 0.681  | 0.62  | 0.722 | 0.747 |
|              | 0.639      | 0.673  | 0.651 | 0.727 | 0.662 |
|              | 0.567      | 0.696  | 0.619 | 0.744 | 0.737 |
|              | 0.605      | 0.712  | 0.633 | 0.705 | 0.755 |
| c-Jun S63    | 0.048      | 0.057  | 0.035 | 0.045 | 0.055 |
|              | 0.056      | 0.06   | 0.056 | 0.049 | 0.047 |
|              | 0.054      | 0.0585 | 0.054 | 0.063 | 0.081 |
|              | 0.071      | 0.0585 | 0.065 | 0.068 | 0.084 |
|              | GSK3-A sh4 |        |       |       |       |
| PDGFRb Y771  | 0.314      | 0.329  | 0.319 | 0.331 | 0.304 |
|              | 0.31       | 0.327  | 0.318 | 0.341 | 0.304 |

|               |        |       |       |       |        |
|---------------|--------|-------|-------|-------|--------|
|               | 0.306  | 0.318 | 0.317 | 0.332 | 0.298  |
|               | 0.311  | 0.323 | 0.318 | 0.341 | 0.281  |
| SHC Y317      | 0.453  | 0.507 | 0.517 | 0.535 | 0.542  |
|               | 0.443  | 0.513 | 0.513 | 0.556 | 0.537  |
|               | 0.429  | 0.506 | 0.518 | 0.52  | 0.533  |
|               | 0.414  | 0.496 | 0.521 | 0.557 | 0.53   |
| c-Cbl Y774    | 0.467  | 0.44  | 0.422 | 0.423 | 0.437  |
|               | 0.475  | 0.457 | 0.422 | 0.436 | 0.423  |
|               | 0.448  | 0.435 | 0.422 | 0.437 | 0.445  |
|               | 0.446  | 0.423 | 0.405 | 0.435 | 0.43   |
| Paxillin Y118 | 0.757  | 0.734 | 0.7   | 0.728 | 0.704  |
|               | 0.745  | 0.747 | 0.72  | 0.726 | 0.7    |
|               | 0.75   | 0.737 | 0.737 | 0.772 | 0.705  |
|               | 0.758  | 0.702 | 0.711 | 0.76  | 0.732  |
| AKT S473      | 0.469  | 0.536 | 0.463 | 0.643 | 0.591  |
|               | 0.478  | 0.498 | 0.492 | 0.641 | 0.543  |
|               | 0.504  | 0.525 | 0.518 | 0.633 | 0.574  |
|               | 0.498  | 0.453 | 0.492 | 0.644 | 0.5693 |
| GSK-3a/b S21  | 0.158  | 0.152 | 0.113 | 0.136 | 0.145  |
|               | 0.131  | 0.143 | 0.131 | 0.149 | 0.129  |
|               | 0.142  | 0.145 | 0.131 | 0.14  | 0.139  |
|               | 0.131  | 0.123 | 0.131 | 0.144 | 0.141  |
| RPS6 S235/S2  | 0.086  | 0.076 | 0.077 | 0.119 | 0.252  |
|               | 0.08   | 0.072 | 0.086 | 0.124 | 0.259  |
|               | 0.084  | 0.087 | 0.092 | 0.106 | 0.228  |
|               | 0.091  | 0.074 | 0.092 | 0.106 | 0.257  |
| RPS6 S240/S2  | 0.0817 | 0.079 | 0.068 | 0.103 | 0.127  |
|               | 0.082  | 0.065 | 0.077 | 0.106 | 0.137  |
|               | 0.084  | 0.079 | 0.088 | 0.102 | 0.122  |
|               | 0.079  | 0.074 | 0.096 | 0.103 | 0.137  |
| PKCb S660     | 0.586  | 0.582 | 0.553 | 0.782 | 0.844  |
|               | 0.594  | 0.595 | 0.559 | 0.827 | 0.811  |
|               | 0.58   | 0.586 | 0.553 | 0.769 | 0.782  |
|               | 0.592  | 0.563 | 0.55  | 0.785 | 0.827  |
| PKCd S643     | 0.733  | 0.703 | 0.668 | 0.696 | 0.69   |
|               | 0.71   | 0.693 | 0.679 | 0.713 | 0.669  |
|               | 0.66   | 0.649 | 0.665 | 0.676 | 0.654  |
|               | 0.652  | 0.633 | 0.643 | 0.689 | 0.662  |
| MARCKs S512,  | 0.646  | 0.614 | 0.669 | 0.607 | 0.558  |

|              |       |       |       |       |        |
|--------------|-------|-------|-------|-------|--------|
|              | 0.621 | 0.685 | 0.677 | 0.645 | 0.528  |
|              | 0.635 | 0.646 | 0.675 | 0.656 | 0.571  |
|              | 0.618 | 0.665 | 0.664 | 0.665 | 0.539  |
| CAMI S81     | 0.698 | 0.761 | 0.706 | 0.678 | 0.708  |
|              | 0.658 | 0.662 | 0.738 | 0.692 | 0.686  |
|              | 0.597 | 0.684 | 0.705 | 0.666 | 0.66   |
|              | 0.613 | 0.712 | 0.662 | 0.671 | 0.682  |
| RSK3 T356/S3 | 0.631 | 0.658 | 0.605 | 0.699 | 0.742  |
|              | 0.622 | 0.665 | 0.604 | 0.694 | 0.676  |
|              | 0.652 | 0.668 | 0.59  | 0.671 | 0.685  |
|              | 0.63  | 0.631 | 0.575 | 0.716 | 0.688  |
| RAF S289/S29 | 0.199 | 0.184 | 0.179 | 0.184 | 0.1863 |
|              | 0.196 | 0.176 | 0.183 | 0.185 | 0.187  |
|              | 0.187 | 0.175 | 0.184 | 0.187 | 0.187  |
|              | 0.184 | 0.169 | 0.18  | 0.188 | 0.185  |
| MEK S217/S2  | 0.195 | 0.203 | 0.222 | 0.533 | 0.686  |
|              | 0.202 | 0.202 | 0.234 | 0.596 | 0.621  |
|              | 0.193 | 0.2   | 0.235 | 0.628 | 0.714  |
|              | 0.208 | 0.194 | 0.239 | 0.634 | 0.715  |
| ERK T202/Y20 | 0.484 | 0.45  | 0.473 | 0.86  | 1.016  |
|              | 0.438 | 0.453 | 0.494 | 0.958 | 0.994  |
|              | 0.506 | 0.42  | 0.502 | 0.962 | 1.069  |
|              | 0.442 | 0.44  | 0.508 | 0.975 | 0.988  |
| p90RSK S380  | 0.358 | 0.2   | 0.252 | 0.254 | 0.344  |
|              | 0.32  | 0.216 | 0.271 | 0.244 | 0.366  |
|              | 0.406 | 0.22  | 0.226 | 0.199 | 0.35   |
|              | 0.446 | 0.203 | 0.22  | 0.204 | 0.363  |
| STAT1 Y701   | 0.418 | 0.397 | 0.405 | 0.438 | 0.443  |
|              | 0.414 | 0.401 | 0.412 | 0.443 | 0.45   |
|              | 0.404 | 0.393 | 0.415 | 0.431 | 0.443  |
|              | 0.406 | 0.396 | 0.413 | 0.443 | 0.445  |
| STAT3 Y705   | 0.619 | 0.646 | 0.639 | 0.631 | 0.638  |
|              | 0.618 | 0.638 | 0.638 | 0.647 | 0.646  |
|              | 0.573 | 0.623 | 0.615 | 0.61  | 0.637  |
|              | 0.597 | 0.616 | 0.625 | 0.626 | 0.6403 |
| CREB S133    | 0.645 | 0.529 | 0.622 | 0.687 | 0.871  |
|              | 0.625 | 0.666 | 0.662 | 0.761 | 0.84   |
|              | 0.568 | 0.545 | 0.629 | 0.675 | 0.806  |
|              | 0.565 | 0.594 | 0.614 | 0.691 | 0.817  |

|               |        |       |        |        |       |
|---------------|--------|-------|--------|--------|-------|
| NF-kB S536    | 0.622  | 0.677 | 0.661  | 0.793  | 0.837 |
|               | 0.6    | 0.688 | 0.661  | 0.803  | 0.774 |
|               | 0.597  | 0.646 | 0.647  | 0.758  | 0.767 |
|               | 0.579  | 0.626 | 0.628  | 0.755  | 0.762 |
| c-Jun S63     | 0.05   | 0.061 | 0.043  | 0.049  | 0.057 |
|               | 0.049  | 0.061 | 0.047  | 0.055  | 0.048 |
|               | 0.056  | 0.066 | 0.058  | 0.063  | 0.064 |
|               | 0.057  | 0.064 | 0.054  | 0.066  | 0.062 |
| GSK3-B sh12   |        |       |        |        |       |
| PDGFRb Y771   | 0.282  | 0.282 | 0.292  | 0.295  | 0.298 |
|               | 0.293  | 0.301 | 0.2953 | 0.291  | 0.298 |
|               | 0.324  | 0.3   | 0.299  | 0.2937 | 0.307 |
|               | 0.312  | 0.304 | 0.295  | 0.295  | 0.294 |
| SHC Y317      | 0.438  | 0.496 | 0.529  | 0.569  | 0.607 |
|               | 0.435  | 0.532 | 0.442  | 0.547  | 0.604 |
|               | 0.489  | 0.501 | 0.519  | 0.461  | 0.604 |
|               | 0.413  | 0.494 | 0.508  | 0.565  | 0.611 |
| c-Cbl Y774    | 0.405  | 0.417 | 0.3905 | 0.407  | 0.395 |
|               | 0.404  | 0.425 | 0.3905 | 0.41   | 0.407 |
|               | 0.426  | 0.402 | 0.388  | 0.343  | 0.379 |
|               | 0.409  | 0.409 | 0.393  | 0.39   | 0.374 |
| Paxillin Y118 | 0.709  | 0.695 | 0.745  | 0.68   | 0.676 |
|               | 0.7157 | 0.693 | 0.614  | 0.656  | 0.668 |
|               | 0.725  | 0.704 | 0.708  | 0.6777 | 0.692 |
|               | 0.713  | 0.729 | 0.692  | 0.697  | 0.677 |
| AKT S473      | 0.522  | 0.566 | 0.529  | 0.529  | 0.536 |
|               | 0.584  | 0.607 | 0.448  | 0.599  | 0.549 |
|               | 0.589  | 0.478 | 0.464  | 0.416  | 0.498 |
|               | 0.427  | 0.504 | 0.518  | 0.575  | 0.468 |
| GSK-3a/b S21  | 0.204  | 0.218 | 0.218  | 0.252  | 0.28  |
|               | 0.338  | 0.26  | 0.173  | 0.326  | 0.253 |
|               | 0.294  | 0.291 | 0.308  | 0.124  | 0.346 |
|               | 0.276  | 0.331 | 0.29   | 0.305  | 0.359 |
| RPS6 S235/S2  | 0.081  | 0.064 | 0.074  | 0.108  | 0.241 |
|               | 0.102  | 0.07  | 0.128  | 0.137  | 0.262 |
|               | 0.123  | 0.073 | 0.09   | 0.168  | 0.21  |
|               | 0.094  | 0.067 | 0.072  | 0.125  | 0.229 |

|              |        |       |        |        |       |
|--------------|--------|-------|--------|--------|-------|
| RPS6 S240/S2 | 0.07   | 0.066 | 0.089  | 0.11   | 0.17  |
|              | 0.103  | 0.074 | 0.162  | 0.145  | 0.175 |
|              | 0.119  | 0.077 | 0.094  | 0.187  | 0.162 |
|              | 0.092  | 0.07  | 0.082  | 0.122  | 0.16  |
| PKCb S660    | 0.585  | 0.592 | 0.561  | 0.758  | 0.971 |
|              | 0.585  | 0.605 | 0.511  | 0.752  | 1.026 |
|              | 0.583  | 0.558 | 0.568  | 0.636  | 1.01  |
|              | 0.579  | 0.588 | 0.576  | 0.756  | 1.012 |
| PKCd S643    | 0.749  | 0.677 | 0.708  | 0.741  | 0.646 |
|              | 0.694  | 0.706 | 0.658  | 0.734  | 0.648 |
|              | 0.675  | 0.699 | 0.726  | 0.679  | 0.648 |
|              | 0.725  | 0.717 | 0.707  | 0.749  | 0.666 |
| MARCKs S512, | 0.7    | 0.748 | 0.723  | 0.729  | 0.765 |
|              | 0.6983 | 0.713 | 0.6887 | 0.622  | 0.71  |
|              | 0.698  | 0.699 | 0.681  | 0.681  | 0.686 |
|              | 0.697  | 0.756 | 0.662  | 0.692  | 0.69  |
| CAMI S81     | 0.583  | 0.605 | 0.581  | 0.604  | 0.633 |
|              | 0.589  | 0.589 | 0.546  | 0.6    | 0.633 |
|              | 0.534  | 0.559 | 0.573  | 0.5763 | 0.55  |
|              | 0.5687 | 0.548 | 0.544  | 0.525  | 0.483 |
| RSK3 T356/S3 | 0.575  | 0.594 | 0.547  | 0.614  | 0.707 |
|              | 0.564  | 0.591 | 0.488  | 0.608  | 0.725 |
|              | 0.579  | 0.577 | 0.541  | 0.504  | 0.706 |
|              | 0.565  | 0.589 | 0.531  | 0.582  | 0.687 |
| RAF S289/S29 | 0.193  | 0.208 | 0.212  | 0.208  | 0.22  |
|              | 0.199  | 0.208 | 0.187  | 0.2    | 0.213 |
|              | 0.206  | 0.194 | 0.199  | 0.165  | 0.201 |
|              | 0.197  | 0.202 | 0.195  | 0.188  | 0.189 |
| MEK S217/S2  | 0.183  | 0.199 | 0.217  | 0.599  | 0.854 |
|              | 0.174  | 0.193 | 0.198  | 0.517  | 0.758 |
|              | 0.17   | 0.181 | 0.211  | 0.322  | 0.776 |
|              | 0.167  | 0.184 | 0.217  | 0.515  | 0.692 |
| ERK T202/Y20 | 0.399  | 0.424 | 0.448  | 0.861  | 1.015 |
|              | 0.411  | 0.403 | 0.398  | 0.866  | 1.08  |
|              | 0.463  | 0.372 | 0.419  | 0.638  | 0.87  |
|              | 0.379  | 0.367 | 0.427  | 0.815  | 0.92  |
| p90RSK S380  | 0.28   | 0.18  | 0.255  | 0.269  | 0.439 |
|              | 0.29   | 0.172 | 0.302  | 0.267  | 0.48  |
|              | 0.734  | 0.361 | 0.275  | 0.208  | 0.274 |
|              | 0.83   | 0.324 | 0.199  | 0.159  | 0.347 |

|               |        |        |        |        |       |
|---------------|--------|--------|--------|--------|-------|
| STAT1 Y701    | 0.391  | 0.399  | 0.414  | 0.441  | 0.484 |
|               | 0.395  | 0.415  | 0.409  | 0.44   | 0.493 |
|               | 0.398  | 0.394  | 0.411  | 0.369  | 0.459 |
|               | 0.408  | 0.407  | 0.408  | 0.414  | 0.451 |
| STAT3 Y705    | 0.5613 | 0.5955 | 0.5873 | 0.599  | 0.622 |
|               | 0.571  | 0.5955 | 0.565  | 0.614  | 0.627 |
|               | 0.578  | 0.585  | 0.594  | 0.6053 | 0.618 |
|               | 0.535  | 0.606  | 0.603  | 0.603  | 0.6   |
| CREB S133     | 0.509  | 0.514  | 0.546  | 0.618  | 0.755 |
|               | 0.5    | 0.564  | 0.47   | 0.598  | 0.768 |
|               | 0.604  | 0.52   | 0.579  | 0.451  | 0.78  |
|               | 0.559  | 0.607  | 0.623  | 0.652  | 0.769 |
| NF-kB S536    | 0.645  | 0.692  | 0.685  | 0.763  | 0.795 |
|               | 0.629  | 0.695  | 0.624  | 0.79   | 0.86  |
|               | 0.667  | 0.68   | 0.693  | 0.681  | 0.831 |
|               | 0.675  | 0.716  | 0.691  | 0.757  | 0.847 |
| c-Jun S63     | 0.043  | 0.048  | 0.048  | 0.047  | 0.065 |
|               | 0.041  | 0.058  | 0.036  | 0.044  | 0.059 |
|               | 0.035  | 0.044  | 0.035  | 0.026  | 0.047 |
|               | 0.033  | 0.042  | 0.031  | 0.036  | 0.044 |
| GSK3-B sh7    |        |        |        |        |       |
| PDGFRb Y771   | 0.309  | 0.325  | 0.317  | 0.319  | 0.316 |
|               | 0.3143 | 0.324  | 0.317  | 0.3187 | 0.323 |
|               | 0.32   | 0.314  | 0.32   | 0.323  | 0.325 |
|               | 0.314  | 0.324  | 0.314  | 0.314  | 0.328 |
| SHC Y317      | 0.48   | 0.513  | 0.522  | 0.544  | 0.555 |
|               | 0.443  | 0.512  | 0.551  | 0.519  | 0.583 |
|               | 0.517  | 0.54   | 0.574  | 0.584  | 0.613 |
|               | 0.505  | 0.562  | 0.557  | 0.577  | 0.604 |
| c-Cbl Y774    | 0.415  | 0.435  | 0.451  | 0.416  | 0.447 |
|               | 0.396  | 0.431  | 0.357  | 0.395  | 0.46  |
|               | 0.402  | 0.389  | 0.408  | 0.388  | 0.418 |
|               | 0.39   | 0.395  | 0.399  | 0.374  | 0.415 |
| Paxillin Y118 | 0.728  | 0.691  | 0.698  | 0.666  | 0.664 |
|               | 0.646  | 0.715  | 0.551  | 0.64   | 0.672 |
|               | 0.722  | 0.651  | 0.648  | 0.615  | 0.631 |
|               | 0.703  | 0.656  | 0.635  | 0.615  | 0.627 |

|              |       |       |        |       |       |
|--------------|-------|-------|--------|-------|-------|
| AKT S473     | 0.705 | 0.696 | 0.541  | 0.574 | 0.652 |
|              | 0.521 | 0.674 | 0.54   | 0.595 | 0.663 |
|              | 0.639 | 0.591 | 0.562  | 0.596 | 0.573 |
|              | 0.593 | 0.575 | 0.517  | 0.554 | 0.574 |
| GSK-3a/b S21 | 0.316 | 0.311 | 0.358  | 0.341 | 0.319 |
|              | 0.164 | 0.288 | 0.297  | 0.26  | 0.376 |
|              | 0.295 | 0.217 | 0.285  | 0.294 | 0.273 |
|              | 0.283 | 0.254 | 0.248  | 0.262 | 0.28  |
| RPS6 S235/S2 | 0.092 | 0.059 | 0.069  | 0.113 | 0.154 |
|              | 0.058 | 0.049 | 0.102  | 0.144 | 0.197 |
|              | 0.081 | 0.059 | 0.068  | 0.119 | 0.167 |
|              | 0.059 | 0.052 | 0.079  | 0.127 | 0.177 |
| RPS6 S240/S2 | 0.081 | 0.085 | 0.11   | 0.158 | 0.159 |
|              | 0.087 | 0.078 | 0.17   | 0.194 | 0.184 |
|              | 0.083 | 0.067 | 0.081  | 0.142 | 0.158 |
|              | 0.073 | 0.064 | 0.088  | 0.159 | 0.16  |
| PKCb S660    | 0.586 | 0.598 | 0.529  | 0.609 | 0.635 |
|              | 0.532 | 0.557 | 0.553  | 0.543 | 0.759 |
|              | 0.656 | 0.617 | 0.569  | 0.715 | 0.804 |
|              | 0.634 | 0.635 | 0.561  | 0.677 | 0.83  |
| PKCd S643    | 0.695 | 0.732 | 0.698  | 0.694 | 0.616 |
|              | 0.642 | 0.735 | 0.71   | 0.678 | 0.651 |
|              | 0.746 | 0.753 | 0.72   | 0.725 | 0.663 |
|              | 0.718 | 0.766 | 0.712  | 0.706 | 0.665 |
| MARCKs S512, | 0.83  | 0.831 | 0.856  | 0.741 | 0.84  |
|              | 0.826 | 0.855 | 0.603  | 0.696 | 0.839 |
|              | 0.819 | 0.778 | 0.818  | 0.728 | 0.796 |
|              | 0.829 | 0.803 | 0.744  | 0.706 | 0.796 |
| CAMI S81     | 0.856 | 0.689 | 0.649  | 0.678 | 0.729 |
|              | 0.757 | 0.688 | 0.6423 | 0.59  | 0.722 |
|              | 0.851 | 0.662 | 0.663  | 0.686 | 0.745 |
|              | 0.83  | 0.692 | 0.615  | 0.642 | 0.747 |
| RSK3 T356/S3 | 0.554 | 0.582 | 0.549  | 0.646 | 0.621 |
|              | 0.49  | 0.578 | 0.515  | 0.575 | 0.625 |
|              | 0.516 | 0.502 | 0.582  | 0.556 | 0.57  |
|              | 0.535 | 0.537 | 0.55   | 0.549 | 0.561 |
| RAF S289/S29 | 0.211 | 0.216 | 0.207  | 0.229 | 0.229 |
|              | 0.211 | 0.213 | 0.2003 | 0.202 | 0.236 |
|              | 0.213 | 0.203 | 0.199  | 0.198 | 0.206 |

|              |           |       |        |       |       |
|--------------|-----------|-------|--------|-------|-------|
|              | 0.209     | 0.21  | 0.195  | 0.201 | 0.207 |
| MEK S217/S22 | 0.209     | 0.188 | 0.224  | 0.572 | 0.844 |
|              | 0.185     | 0.19  | 0.144  | 0.548 | 0.854 |
|              | 0.19      | 0.172 | 0.203  | 0.495 | 0.749 |
|              | 0.198     | 0.178 | 0.186  | 0.432 | 0.735 |
| ERK T202/Y20 | 0.448     | 0.429 | 0.462  | 0.863 | 0.981 |
|              | 0.353     | 0.428 | 0.419  | 0.789 | 1.039 |
|              | 0.422     | 0.382 | 0.412  | 0.746 | 1.077 |
|              | 0.366     | 0.391 | 0.417  | 0.744 | 1.113 |
| p90RSK S380  | 0.291     | 0.352 | 0.356  | 0.326 | 0.332 |
|              | 0.393     | 0.33  | 0.391  | 0.294 | 0.274 |
|              | 0.469     | 0.379 | 0.351  | 0.305 | 0.33  |
|              | 0.3843    | 0.391 | 0.347  | 0.303 | 0.342 |
| STAT1 Y701   | 0.421     | 0.424 | 0.424  | 0.446 | 0.452 |
|              | 0.4253    | 0.422 | 0.4307 | 0.436 | 0.478 |
|              | 0.435     | 0.429 | 0.437  | 0.483 | 0.502 |
|              | 0.42      | 0.444 | 0.431  | 0.464 | 0.499 |
| STAT3 Y705   | 0.625     | 0.604 | 0.588  | 0.606 | 0.566 |
|              | 0.606     | 0.593 | 0.616  | 0.606 | 0.61  |
|              | 0.692     | 0.618 | 0.628  | 0.651 | 0.618 |
|              | 0.661     | 0.643 | 0.632  | 0.642 | 0.622 |
| CREB S133    | 0.558     | 0.546 | 0.57   | 0.661 | 0.807 |
|              | 0.502     | 0.552 | 0.585  | 0.586 | 0.816 |
|              | 0.583     | 0.576 | 0.607  | 0.689 | 0.805 |
|              | 0.59      | 0.623 | 0.578  | 0.674 | 0.831 |
| NF-kB S536   | 0.668     | 0.682 | 0.695  | 0.752 | 0.805 |
|              | 0.638     | 0.693 | 0.582  | 0.651 | 0.812 |
|              | 0.655     | 0.643 | 0.674  | 0.717 | 0.801 |
|              | 0.694     | 0.651 | 0.656  | 0.719 | 0.788 |
| c-Jun S63    | 0.045     | 0.051 | 0.048  | 0.038 | 0.051 |
|              | 0.031     | 0.051 | 0.026  | 0.034 | 0.05  |
|              | 0.038     | 0.028 | 0.034  | 0.032 | 0.044 |
|              | 0.04      | 0.036 | 0.032  | 0.045 | 0.047 |
|              | GSK3 pool |       |        |       |       |
| PDGFRb Y771  | 0.294     | 0.303 | 0.328  | 0.348 | 0.334 |
|              | 0.318     | 0.312 | 0.348  | 0.353 | 0.348 |
|              | 0.329     | 0.31  | 0.365  | 0.362 | 0.359 |

|               |        |       |       |       |       |
|---------------|--------|-------|-------|-------|-------|
|               | 0.323  | 0.308 | 0.328 | 0.355 | 0.338 |
| SHC Y317      | 0.452  | 0.509 | 0.555 | 0.548 | 0.593 |
|               | 0.496  | 0.537 | 0.605 | 0.598 | 0.655 |
|               | 0.525  | 0.567 | 0.62  | 0.587 | 0.65  |
|               | 0.513  | 0.547 | 0.571 | 0.558 | 0.621 |
| c-Cbl Y774    | 0.394  | 0.396 | 0.427 | 0.439 | 0.413 |
|               | 0.446  | 0.417 | 0.455 | 0.459 | 0.449 |
|               | 0.452  | 0.436 | 0.465 | 0.471 | 0.458 |
|               | 0.467  | 0.45  | 0.469 | 0.471 | 0.466 |
| Paxillin Y118 | 0.742  | 0.647 | 0.684 | 0.688 | 0.682 |
|               | 0.761  | 0.659 | 0.736 | 0.655 | 0.732 |
|               | 0.739  | 0.695 | 0.726 | 0.711 | 0.705 |
|               | 0.774  | 0.726 | 0.73  | 0.718 | 0.734 |
| AKT S473      | 0.478  | 0.489 | 0.502 | 0.46  | 0.573 |
|               | 0.475  | 0.49  | 0.464 | 0.448 | 0.561 |
|               | 0.494  | 0.502 | 0.541 | 0.567 | 0.599 |
|               | 0.465  | 0.486 | 0.545 | 0.556 | 0.661 |
| GSK-3a/b S21  | 0.335  | 0.383 | 0.365 | 0.394 | 0.421 |
|               | 0.398  | 0.373 | 0.406 | 0.418 | 0.461 |
|               | 0.496  | 0.617 | 0.596 | 0.589 | 0.639 |
|               | 0.511  | 0.502 | 0.455 | 0.444 | 0.59  |
| RPS6 S235/S2  | 0.0877 | 0.097 | 0.092 | 0.105 | 0.11  |
|               | 0.083  | 0.088 | 0.099 | 0.116 | 0.118 |
|               | 0.092  | 0.115 | 0.101 | 0.112 | 0.142 |
|               | 0.088  | 0.092 | 0.101 | 0.118 | 0.131 |
| RPS6 S240/S2  | 0.058  | 0.078 | 0.079 | 0.093 | 0.066 |
|               | 0.065  | 0.07  | 0.089 | 0.107 | 0.074 |
|               | 0.053  | 0.078 | 0.073 | 0.081 | 0.065 |
|               | 0.056  | 0.07  | 0.082 | 0.092 | 0.079 |
| PKCb S660     | 0.544  | 0.597 | 0.571 | 0.638 | 0.799 |
|               | 0.572  | 0.598 | 0.622 | 0.654 | 0.857 |
|               | 0.612  | 0.676 | 0.692 | 0.742 | 0.937 |
|               | 0.561  | 0.611 | 0.563 | 0.626 | 0.814 |
| PKCd S643     | 0.676  | 0.728 | 0.714 | 0.746 | 0.761 |
|               | 0.74   | 0.715 | 0.734 | 0.749 | 0.731 |
|               | 0.76   | 0.808 | 0.779 | 0.762 | 0.769 |
|               | 0.672  | 0.719 | 0.699 | 0.706 | 0.693 |
| MARCKs S512,  | 0.696  | 0.599 | 0.722 | 0.784 | 0.73  |
|               | 0.685  | 0.604 | 0.729 | 0.76  | 0.784 |

|              |        |       |       |       |       |
|--------------|--------|-------|-------|-------|-------|
|              | 0.673  | 0.659 | 0.736 | 0.773 | 0.732 |
|              | 0.674  | 0.7   | 0.739 | 0.823 | 0.707 |
| CAMI S81     | 0.512  | 0.543 | 0.509 | 0.498 | 0.54  |
|              | 0.462  | 0.451 | 0.503 | 0.491 | 0.529 |
|              | 0.493  | 0.509 | 0.517 | 0.545 | 0.549 |
|              | 0.48   | 0.483 | 0.507 | 0.516 | 0.519 |
| RSK3 T356/S3 | 0.537  | 0.549 | 0.578 | 0.603 | 0.614 |
|              | 0.577  | 0.555 | 0.62  | 0.638 | 0.647 |
|              | 0.563  | 0.56  | 0.646 | 0.667 | 0.704 |
|              | 0.569  | 0.563 | 0.642 | 0.65  | 0.711 |
| RAF S289/S29 | 0.181  | 0.186 | 0.178 | 0.197 | 0.193 |
|              | 0.192  | 0.193 | 0.189 | 0.197 | 0.207 |
|              | 0.198  | 0.201 | 0.198 | 0.213 | 0.21  |
|              | 0.206  | 0.207 | 0.199 | 0.219 | 0.22  |
| MEK S217/S2  | 0.1763 | 0.176 | 0.352 | 0.422 | 0.94  |
|              | 0.164  | 0.178 | 0.395 | 0.424 | 0.909 |
|              | 0.18   | 0.188 | 0.487 | 0.538 | 1.07  |
|              | 0.185  | 0.18  | 0.396 | 0.53  | 0.975 |
| ERK T202/Y20 | 0.338  | 0.341 | 0.605 | 0.742 | 0.906 |
|              | 0.387  | 0.374 | 0.674 | 0.741 | 0.946 |
|              | 0.385  | 0.35  | 0.731 | 0.676 | 0.973 |
|              | 0.409  | 0.37  | 0.654 | 0.767 | 0.943 |
| p90RSK S380  | 0.103  | 0.246 | 0.244 | 0.306 | 0.1   |
|              | 0.319  | 0.239 | 0.263 | 0.311 | 0.362 |
|              | 0.388  | 0.277 | 0.277 | 0.38  | 0.465 |
|              | 0.342  | 0.235 | 0.234 | 0.297 | 0.4   |
| STAT1 Y701   | 0.381  | 0.419 | 0.442 | 0.446 | 0.428 |
|              | 0.423  | 0.426 | 0.477 | 0.445 | 0.475 |
|              | 0.414  | 0.427 | 0.467 | 0.475 | 0.467 |
|              | 0.393  | 0.409 | 0.444 | 0.466 | 0.432 |
| STAT3 Y705   | 0.597  | 0.586 | 0.625 | 0.613 | 0.6   |
|              | 0.653  | 0.604 | 0.677 | 0.647 | 0.625 |
|              | 0.651  | 0.643 | 0.709 | 0.666 | 0.663 |
|              | 0.662  | 0.607 | 0.671 | 0.656 | 0.65  |
| CREB S133    | 0.64   | 0.553 | 0.72  | 0.772 | 0.873 |
|              | 0.704  | 0.574 | 0.812 | 0.84  | 1.007 |
|              | 0.783  | 0.697 | 0.88  | 0.962 | 1.034 |
|              | 0.723  | 0.721 | 0.78  | 0.842 | 0.916 |
| NF-kB S536   | 0.719  | 0.772 | 0.746 | 0.85  | 0.941 |

|               |           |       |       |       |       |
|---------------|-----------|-------|-------|-------|-------|
|               | 0.765     | 0.813 | 0.791 | 0.868 | 0.965 |
|               | 0.83      | 0.854 | 0.871 | 0.998 | 1.08  |
|               | 0.81      | 0.892 | 0.783 | 0.87  | 1.043 |
| c-Jun S63     | 0.0543    | 0.053 | 0.058 | 0.056 | 0.056 |
|               | 0.051     | 0.053 | 0.064 | 0.075 | 0.068 |
|               | 0.052     | 0.052 | 0.054 | 0.055 | 0.062 |
|               | 0.06      | 0.068 | 0.065 | 0.067 | 0.066 |
|               | HRAS sh12 |       |       |       |       |
| PDGFRb Y771   | 0.273     | 0.268 | 0.253 | 0.263 | 0.285 |
|               | 0.28      | 0.286 | 0.267 | 0.267 | 0.279 |
|               | 0.285     | 0.271 | 0.251 | 0.269 | 0.27  |
|               | 0.28      | 0.296 | 0.26  | 0.277 | 0.278 |
| SHC Y317      | 0.416     | 0.45  | 0.409 | 0.438 | 0.51  |
|               | 0.418     | 0.466 | 0.429 | 0.463 | 0.496 |
|               | 0.429     | 0.506 | 0.467 | 0.524 | 0.533 |
|               | 0.44      | 0.505 | 0.479 | 0.539 | 0.55  |
| c-Cbl Y774    | 0.385     | 0.376 | 0.328 | 0.328 | 0.361 |
|               | 0.377     | 0.388 | 0.348 | 0.344 | 0.37  |
|               | 0.388     | 0.376 | 0.348 | 0.364 | 0.382 |
|               | 0.3833    | 0.396 | 0.351 | 0.357 | 0.378 |
| Paxillin Y118 | 0.655     | 0.657 | 0.619 | 0.584 | 0.637 |
|               | 0.641     | 0.656 | 0.674 | 0.642 | 0.65  |
|               | 0.675     | 0.645 | 0.61  | 0.607 | 0.615 |
|               | 0.725     | 0.692 | 0.621 | 0.617 | 0.664 |
| AKT S473      | 0.661     | 0.604 | 0.524 | 0.529 | 0.614 |
|               | 0.524     | 0.557 | 0.586 | 0.623 | 0.602 |
|               | 0.55      | 0.518 | 0.516 | 0.567 | 0.584 |
|               | 0.533     | 0.517 | 0.509 | 0.584 | 0.609 |
| GSK-3a/b S21  | 0.686     | 0.548 | 0.564 | 0.667 | 0.611 |
|               | 0.585     | 0.549 | 0.468 | 0.583 | 0.611 |
|               | 0.619     | 0.652 | 0.564 | 0.577 | 0.605 |
|               | 0.598     | 0.518 | 0.45  | 0.599 | 0.624 |
| RPS6 S235/S2  | 0.181     | 0.1   | 0.142 | 0.166 | 0.268 |
|               | 0.117     | 0.071 | 0.126 | 0.166 | 0.295 |
|               | 0.135     | 0.091 | 0.144 | 0.13  | 0.299 |
|               | 0.107     | 0.083 | 0.117 | 0.162 | 0.275 |
| RPS6 S240/S2  | 0.124     | 0.099 | 0.147 | 0.183 | 0.206 |

|              |       |       |       |       |       |
|--------------|-------|-------|-------|-------|-------|
|              | 0.109 | 0.069 | 0.133 | 0.169 | 0.219 |
|              | 0.119 | 0.088 | 0.139 | 0.13  | 0.201 |
|              | 0.098 | 0.081 | 0.114 | 0.155 | 0.176 |
| PKCb S660    | 0.535 | 0.538 | 0.48  | 0.677 | 0.969 |
|              | 0.524 | 0.541 | 0.498 | 0.746 | 0.936 |
|              | 0.572 | 0.562 | 0.491 | 0.732 | 0.99  |
|              | 0.564 | 0.549 | 0.518 | 0.785 | 0.964 |
| PKCd S643    | 0.646 | 0.64  | 0.599 | 0.613 | 0.638 |
|              | 0.65  | 0.662 | 0.616 | 0.622 | 0.629 |
|              | 0.661 | 0.65  | 0.611 | 0.641 | 0.655 |
|              | 0.659 | 0.674 | 0.618 | 0.653 | 0.665 |
| MARCKs S512, | 0.555 | 0.642 | 0.476 | 0.43  | 0.553 |
|              | 0.551 | 0.685 | 0.534 | 0.486 | 0.525 |
|              | 0.6   | 0.644 | 0.501 | 0.519 | 0.564 |
|              | 0.618 | 0.666 | 0.519 | 0.55  | 0.563 |
| CAMI S81     | 0.482 | 0.46  | 0.525 | 0.441 | 0.46  |
|              | 0.474 | 0.482 | 0.469 | 0.515 | 0.565 |
|              | 0.566 | 0.499 | 0.479 | 0.483 | 0.513 |
|              | 0.59  | 0.55  | 0.522 | 0.528 | 0.56  |
| RSK3 T356/S3 | 0.521 | 0.567 | 0.498 | 0.529 | 0.64  |
|              | 0.518 | 0.576 | 0.514 | 0.564 | 0.63  |
|              | 0.533 | 0.563 | 0.516 | 0.578 | 0.638 |
|              | 0.544 | 0.582 | 0.513 | 0.586 | 0.644 |
| RAF S289/S29 | 0.178 | 0.181 | 0.167 | 0.167 | 0.199 |
|              | 0.176 | 0.191 | 0.18  | 0.178 | 0.2   |
|              | 0.177 | 0.184 | 0.157 | 0.176 | 0.197 |
|              | 0.184 | 0.191 | 0.175 | 0.181 | 0.193 |
| MEK S217/S2  | 0.147 | 0.159 | 0.188 | 0.388 | 0.651 |
|              | 0.161 | 0.176 | 0.212 | 0.421 | 0.594 |
|              | 0.163 | 0.171 | 0.19  | 0.389 | 0.57  |
|              | 0.18  | 0.17  | 0.185 | 0.431 | 0.561 |
| ERK T202/Y20 | 0.377 | 0.35  | 0.394 | 0.622 | 0.9   |
|              | 0.332 | 0.364 | 0.415 | 0.775 | 0.904 |
|              | 0.373 | 0.357 | 0.379 | 0.717 | 1.073 |
|              | 0.373 | 0.374 | 0.383 | 0.754 | 1.089 |
| p90RSK S380  | 0.638 | 0.202 | 0.265 | 0.213 | 0.24  |
|              | 0.524 | 0.203 | 0.245 | 0.237 | 0.319 |
|              | 0.558 | 0.249 | 0.257 | 0.207 | 0.355 |
|              | 0.456 | 0.228 | 0.257 | 0.219 | 0.38  |

|               |          |       |       |       |       |
|---------------|----------|-------|-------|-------|-------|
| STAT1 Y701    | 0.389    | 0.389 | 0.376 | 0.341 | 0.444 |
|               | 0.386    | 0.408 | 0.388 | 0.389 | 0.448 |
|               | 0.372    | 0.406 | 0.368 | 0.37  | 0.424 |
|               | 0.3823   | 0.411 | 0.37  | 0.398 | 0.464 |
| STAT3 Y705    | 0.531    | 0.509 | 0.526 | 0.518 | 0.54  |
|               | 0.519    | 0.533 | 0.536 | 0.529 | 0.539 |
|               | 0.537    | 0.536 | 0.539 | 0.552 | 0.563 |
|               | 0.552    | 0.559 | 0.559 | 0.551 | 0.568 |
| CREB S133     | 0.517    | 0.542 | 0.544 | 0.621 | 0.89  |
|               | 0.553    | 0.652 | 0.626 | 0.749 | 0.886 |
|               | 0.6      | 0.607 | 0.587 | 0.719 | 0.851 |
|               | 0.61     | 0.664 | 0.584 | 0.758 | 0.908 |
| NF-kB S536    | 0.622    | 0.631 | 0.588 | 0.63  | 0.822 |
|               | 0.6      | 0.638 | 0.616 | 0.71  | 0.806 |
|               | 0.63     | 0.655 | 0.618 | 0.733 | 0.848 |
|               | 0.648    | 0.652 | 0.621 | 0.736 | 0.851 |
| c-Jun S63     | 0.035    | 0.038 | 0.029 | 0.029 | 0.035 |
|               | 0.03     | 0.044 | 0.034 | 0.027 | 0.036 |
|               | 0.039    | 0.039 | 0.027 | 0.033 | 0.039 |
|               | 0.048    | 0.046 | 0.035 | 0.039 | 0.039 |
| PDGFRb Y771   | HRAS sh9 |       |       |       |       |
|               | 0.265    | 0.294 | 0.255 | 0.271 | 0.282 |
|               | 0.27     | 0.289 | 0.28  | 0.275 | 0.271 |
|               | 0.274    | 0.285 | 0.283 | 0.28  | 0.265 |
|               | 0.271    | 0.288 | 0.265 | 0.276 | 0.268 |
| SHC Y317      | 0.399    | 0.498 | 0.502 | 0.504 | 0.532 |
|               | 0.404    | 0.513 | 0.466 | 0.509 | 0.515 |
|               | 0.417    | 0.492 | 0.514 | 0.531 | 0.52  |
|               | 0.388    | 0.495 | 0.526 | 0.538 | 0.513 |
| c-Cbl Y774    | 0.371    | 0.38  | 0.339 | 0.361 | 0.389 |
|               | 0.378    | 0.411 | 0.369 | 0.365 | 0.364 |
|               | 0.385    | 0.398 | 0.41  | 0.402 | 0.389 |
|               | 0.382    | 0.403 | 0.403 | 0.397 | 0.391 |
| Paxillin Y118 | 0.667    | 0.701 | 0.523 | 0.619 | 0.647 |
|               | 0.664    | 0.724 | 0.613 | 0.627 | 0.652 |
|               | 0.691    | 0.708 | 0.661 | 0.674 | 0.676 |
|               | 0.707    | 0.705 | 0.658 | 0.65  | 0.678 |

|              |       |        |        |       |       |
|--------------|-------|--------|--------|-------|-------|
| AKT S473     | 0.488 | 0.504  | 0.421  | 0.545 | 0.66  |
|              | 0.571 | 0.506  | 0.464  | 0.562 | 0.608 |
|              | 0.505 | 0.535  | 0.557  | 0.499 | 0.641 |
|              | 0.474 | 0.429  | 0.542  | 0.584 | 0.673 |
| GSK-3a/b S21 | 0.507 | 0.473  | 0.447  | 0.501 | 0.5   |
|              | 0.489 | 0.477  | 0.523  | 0.517 | 0.617 |
|              | 0.563 | 0.57   | 0.61   | 0.565 | 0.645 |
|              | 0.538 | 0.586  | 0.649  | 0.568 | 0.549 |
| RPS6 S235/S2 | 0.181 | 0.133  | 0.158  | 0.219 | 0.278 |
|              | 0.143 | 0.094  | 0.159  | 0.233 | 0.336 |
|              | 0.162 | 0.107  | 0.15   | 0.202 | 0.32  |
|              | 0.133 | 0.097  | 0.158  | 0.222 | 0.317 |
| RPS6 S240/S2 | 0.169 | 0.108  | 0.162  | 0.21  | 0.213 |
|              | 0.131 | 0.09   | 0.165  | 0.232 | 0.26  |
|              | 0.143 | 0.101  | 0.143  | 0.186 | 0.237 |
|              | 0.121 | 0.089  | 0.144  | 0.199 | 0.226 |
| PKCb S660    | 0.513 | 0.534  | 0.46   | 0.672 | 0.898 |
|              | 0.52  | 0.547  | 0.525  | 0.696 | 0.864 |
|              | 0.533 | 0.527  | 0.555  | 0.733 | 0.921 |
|              | 0.537 | 0.531  | 0.542  | 0.72  | 0.934 |
| PKCd S643    | 0.609 | 0.612  | 0.6123 | 0.614 | 0.614 |
|              | 0.619 | 0.612  | 0.606  | 0.618 | 0.618 |
|              | 0.616 | 0.608  | 0.614  | 0.617 | 0.612 |
|              | 0.593 | 0.616  | 0.617  | 0.619 | 0.612 |
| MARCKs S512, | 0.527 | 0.566  | 0.473  | 0.502 | 0.561 |
|              | 0.507 | 0.673  | 0.526  | 0.509 | 0.502 |
|              | 0.59  | 0.62   | 0.64   | 0.598 | 0.562 |
|              | 0.582 | 0.65   | 0.637  | 0.577 | 0.576 |
| CAMI S81     | 0.427 | 0.525  | 0.5247 | 0.515 | 0.651 |
|              | 0.535 | 0.5013 | 0.491  | 0.542 | 0.579 |
|              | 0.521 | 0.471  | 0.537  | 0.574 | 0.587 |
|              | 0.39  | 0.508  | 0.546  | 0.541 | 0.485 |
| RSK3 T356/S3 | 0.533 | 0.553  | 0.488  | 0.585 | 0.661 |
|              | 0.536 | 0.57   | 0.53   | 0.597 | 0.632 |
|              | 0.558 | 0.538  | 0.564  | 0.641 | 0.66  |
|              | 0.561 | 0.536  | 0.568  | 0.635 | 0.69  |
| RAF S289/S29 | 0.176 | 0.185  | 0.1867 | 0.181 | 0.206 |
|              | 0.183 | 0.194  | 0.181  | 0.184 | 0.21  |
|              | 0.194 | 0.19   | 0.179  | 0.192 | 0.21  |
|              | 0.185 | 0.194  | 0.2    | 0.184 | 0.215 |

|              |          |        |       |        |       |
|--------------|----------|--------|-------|--------|-------|
| MEK S217/S22 | 0.148    | 0.168  | 0.166 | 0.425  | 0.664 |
|              | 0.156    | 0.179  | 0.199 | 0.468  | 0.571 |
|              | 0.156    | 0.175  | 0.236 | 0.436  | 0.649 |
|              | 0.17     | 0.177  | 0.23  | 0.52   | 0.623 |
| ERK T202/Y20 | 0.4      | 0.35   | 0.368 | 0.732  | 0.899 |
|              | 0.355    | 0.37   | 0.406 | 0.803  | 0.873 |
|              | 0.375    | 0.35   | 0.438 | 0.844  | 0.949 |
|              | 0.349    | 0.371  | 0.441 | 0.862  | 0.928 |
| p90RSK S380  | 0.593    | 0.206  | 0.258 | 0.195  | 0.38  |
|              | 0.635    | 0.194  | 0.276 | 0.215  | 0.402 |
|              | 0.501    | 0.237  | 0.22  | 0.228  | 0.402 |
|              | 0.482    | 0.211  | 0.22  | 0.245  | 0.424 |
| STAT1 Y701   | 0.355    | 0.392  | 0.37  | 0.421  | 0.45  |
|              | 0.387    | 0.3887 | 0.39  | 0.405  | 0.417 |
|              | 0.361    | 0.383  | 0.393 | 0.432  | 0.412 |
|              | 0.373    | 0.391  | 0.403 | 0.407  | 0.449 |
| STAT3 Y705   | 0.51     | 0.567  | 0.505 | 0.533  | 0.54  |
|              | 0.516    | 0.587  | 0.533 | 0.534  | 0.548 |
|              | 0.527    | 0.567  | 0.545 | 0.546  | 0.538 |
|              | 0.521    | 0.576  | 0.547 | 0.54   | 0.538 |
| CREB S133    | 0.528    | 0.603  | 0.512 | 0.711  | 0.972 |
|              | 0.576    | 0.772  | 0.62  | 0.783  | 0.901 |
|              | 0.585    | 0.646  | 0.7   | 0.79   | 0.9   |
|              | 0.572    | 0.698  | 0.707 | 0.801  | 0.946 |
| NF-kB S536   | 0.603    | 0.606  | 0.571 | 0.719  | 0.85  |
|              | 0.59     | 0.63   | 0.628 | 0.73   | 0.845 |
|              | 0.619    | 0.64   | 0.685 | 0.811  | 0.882 |
|              | 0.624    | 0.651  | 0.669 | 0.775  | 0.893 |
| c-Jun S63    | 0.037    | 0.043  | 0.022 | 0.03   | 0.047 |
|              | 0.035    | 0.055  | 0.03  | 0.032  | 0.049 |
|              | 0.035    | 0.045  | 0.041 | 0.037  | 0.047 |
|              | 0.036    | 0.05   | 0.041 | 0.038  | 0.048 |
| PDGFRb Y771  | KRAS sh3 |        |       |        |       |
|              | 0.27     | 0.276  | 0.279 | 0.2837 | 0.276 |
|              | 0.266    | 0.276  | 0.272 | 0.281  | 0.29  |
|              | 0.274    | 0.272  | 0.288 | 0.279  | 0.286 |
|              | 0.27     | 0.283  | 0.277 | 0.291  | 0.281 |

|               |       |       |       |       |       |
|---------------|-------|-------|-------|-------|-------|
| SHC Y317      | 0.372 | 0.453 | 0.463 | 0.441 | 0.494 |
|               | 0.399 | 0.464 | 0.479 | 0.491 | 0.539 |
|               | 0.408 | 0.459 | 0.442 | 0.465 | 0.492 |
|               | 0.407 | 0.447 | 0.468 | 0.502 | 0.52  |
| c-Cbl Y774    | 0.354 | 0.399 | 0.336 | 0.356 | 0.398 |
|               | 0.393 | 0.406 | 0.39  | 0.392 | 0.409 |
|               | 0.375 | 0.374 | 0.367 | 0.362 | 0.359 |
|               | 0.382 | 0.385 | 0.381 | 0.368 | 0.374 |
| Paxillin Y118 | 0.595 | 0.663 | 0.567 | 0.559 | 0.665 |
|               | 0.734 | 0.728 | 0.707 | 0.61  | 0.739 |
|               | 0.631 | 0.627 | 0.615 | 0.569 | 0.62  |
|               | 0.7   | 0.668 | 0.668 | 0.632 | 0.698 |
| AKT S473      | 0.403 | 0.546 | 0.412 | 0.514 | 0.642 |
|               | 0.466 | 0.532 | 0.521 | 0.602 | 0.503 |
|               | 0.43  | 0.468 | 0.445 | 0.482 | 0.547 |
|               | 0.45  | 0.528 | 0.536 | 0.566 | 0.464 |
| GSK-3a/b S21  | 0.456 | 0.462 | 0.43  | 0.573 | 0.595 |
|               | 0.439 | 0.457 | 0.445 | 0.588 | 0.604 |
|               | 0.528 | 0.509 | 0.485 | 0.568 | 0.636 |
|               | 0.526 | 0.533 | 0.455 | 0.532 | 0.532 |
| RPS6 S235/S2  | 0.14  | 0.142 | 0.126 | 0.169 | 0.29  |
|               | 0.135 | 0.125 | 0.155 | 0.196 | 0.277 |
|               | 0.171 | 0.147 | 0.14  | 0.173 | 0.268 |
|               | 0.159 | 0.153 | 0.153 | 0.182 | 0.266 |
| RPS6 S240/S2  | 0.122 | 0.114 | 0.109 | 0.139 | 0.181 |
|               | 0.11  | 0.107 | 0.139 | 0.162 | 0.172 |
|               | 0.145 | 0.121 | 0.123 | 0.153 | 0.156 |
|               | 0.142 | 0.14  | 0.13  | 0.147 | 0.162 |
| PKCb S660     | 0.511 | 0.51  | 0.496 | 0.745 | 0.988 |
|               | 0.548 | 0.528 | 0.558 | 0.85  | 0.936 |
|               | 0.557 | 0.534 | 0.574 | 0.777 | 1.002 |
|               | 0.573 | 0.54  | 0.605 | 0.872 | 1.006 |
| PKCd S643     | 0.584 | 0.625 | 0.562 | 0.563 | 0.598 |
|               | 0.643 | 0.603 | 0.63  | 0.63  | 0.622 |
|               | 0.628 | 0.589 | 0.634 | 0.624 | 0.587 |
|               | 0.629 | 0.621 | 0.643 | 0.649 | 0.611 |
| MARCKs S512,  | 0.487 | 0.709 | 0.438 | 0.476 | 0.627 |
|               | 0.641 | 0.715 | 0.663 | 0.636 | 0.647 |
|               | 0.591 | 0.645 | 0.561 | 0.555 | 0.601 |

|              |       |       |        |       |       |
|--------------|-------|-------|--------|-------|-------|
|              | 0.615 | 0.659 | 0.624  | 0.631 | 0.648 |
| CAMI S81     | 0.52  | 0.534 | 0.5277 | 0.534 | 0.536 |
|              | 0.519 | 0.553 | 0.538  | 0.523 | 0.508 |
|              | 0.512 | 0.502 | 0.492  | 0.511 | 0.528 |
|              | 0.529 | 0.54  | 0.553  | 0.568 | 0.619 |
| RSK3 T356/S3 | 0.588 | 0.62  | 0.542  | 0.664 | 0.802 |
|              | 0.639 | 0.648 | 0.651  | 0.776 | 0.895 |
|              | 0.612 | 0.593 | 0.584  | 0.675 | 0.728 |
|              | 0.602 | 0.61  | 0.624  | 0.73  | 0.843 |
| RAF S289/S29 | 0.162 | 0.201 | 0.16   | 0.164 | 0.207 |
|              | 0.199 | 0.198 | 0.2    | 0.197 | 0.221 |
|              | 0.181 | 0.18  | 0.175  | 0.161 | 0.185 |
|              | 0.185 | 0.186 | 0.186  | 0.182 | 0.192 |
| MEK S217/S2  | 0.152 | 0.196 | 0.26   | 0.654 | 1.194 |
|              | 0.201 | 0.212 | 0.364  | 0.981 | 1.313 |
|              | 0.174 | 0.191 | 0.288  | 0.658 | 0.93  |
|              | 0.195 | 0.176 | 0.295  | 0.775 | 1.088 |
| ERK T202/Y20 | 0.356 | 0.393 | 0.473  | 0.803 | 1.122 |
|              | 0.364 | 0.401 | 0.572  | 0.881 | 1.215 |
|              | 0.362 | 0.368 | 0.494  | 0.844 | 1.199 |
|              | 0.348 | 0.359 | 0.511  | 0.766 | 1.09  |
| p90RSK S380  | 0.598 | 0.185 | 0.326  | 0.246 | 0.417 |
|              | 0.452 | 0.238 | 0.252  | 0.297 | 0.489 |
|              | 0.772 | 0.248 | 0.256  | 0.284 | 0.5   |
|              | 0.596 | 0.256 | 0.263  | 0.29  | 0.52  |
| STAT1 Y701   | 0.35  | 0.358 | 0.336  | 0.34  | 0.415 |
|              | 0.373 | 0.348 | 0.376  | 0.38  | 0.416 |
|              | 0.388 | 0.343 | 0.366  | 0.359 | 0.407 |
|              | 0.38  | 0.367 | 0.391  | 0.382 | 0.437 |
| STAT3 Y705   | 0.499 | 0.548 | 0.485  | 0.516 | 0.57  |
|              | 0.502 | 0.533 | 0.503  | 0.52  | 0.564 |
|              | 0.545 | 0.579 | 0.548  | 0.536 | 0.594 |
|              | 0.533 | 0.57  | 0.545  | 0.55  | 0.588 |
| CREB S133    | 0.459 | 0.473 | 0.426  | 0.517 | 0.82  |
|              | 0.525 | 0.533 | 0.579  | 0.673 | 0.835 |
|              | 0.549 | 0.504 | 0.543  | 0.624 | 0.788 |
|              | 0.552 | 0.475 | 0.575  | 0.708 | 0.846 |
| NF-kB S536   | 0.658 | 0.722 | 0.595  | 0.749 | 0.981 |
|              | 0.696 | 0.745 | 0.703  | 0.855 | 0.939 |

|               |          |       |       |       |        |
|---------------|----------|-------|-------|-------|--------|
|               | 0.694    | 0.71  | 0.67  | 0.794 | 0.875  |
|               | 0.685    | 0.687 | 0.676 | 0.826 | 0.877  |
| c-Jun S63     | 0.032    | 0.075 | 0.031 | 0.035 | 0.064  |
|               | 0.059    | 0.092 | 0.075 | 0.053 | 0.087  |
|               | 0.041    | 0.054 | 0.035 | 0.039 | 0.048  |
|               | 0.051    | 0.062 | 0.055 | 0.048 | 0.066  |
|               | KRAS sh5 |       |       |       |        |
| PDGFRb Y771   | 0.28     | 0.311 | 0.272 | 0.28  | 0.294  |
|               | 0.281    | 0.297 | 0.287 | 0.294 | 0.2937 |
|               | 0.274    | 0.306 | 0.288 | 0.285 | 0.29   |
|               | 0.282    | 0.308 | 0.316 | 0.288 | 0.297  |
| SHC Y317      | 0.444    | 0.515 | 0.473 | 0.512 | 0.563  |
|               | 0.431    | 0.555 | 0.561 | 0.533 | 0.613  |
|               | 0.414    | 0.504 | 0.528 | 0.509 | 0.559  |
|               | 0.425    | 0.504 | 0.555 | 0.523 | 0.564  |
| c-Cbl Y774    | 0.405    | 0.409 | 0.357 | 0.356 | 0.399  |
|               | 0.401    | 0.411 | 0.372 | 0.366 | 0.426  |
|               | 0.407    | 0.392 | 0.378 | 0.364 | 0.404  |
|               | 0.402    | 0.4   | 0.391 | 0.372 | 0.411  |
| Paxillin Y118 | 0.732    | 0.708 | 0.608 | 0.615 | 0.641  |
|               | 0.743    | 0.727 | 0.697 | 0.691 | 0.734  |
|               | 0.756    | 0.691 | 0.632 | 0.636 | 0.671  |
|               | 0.751    | 0.737 | 0.742 | 0.645 | 0.715  |
| AKT S473      | 0.503    | 0.511 | 0.55  | 0.665 | 0.594  |
|               | 0.479    | 0.476 | 0.486 | 0.602 | 0.607  |
|               | 0.563    | 0.54  | 0.545 | 0.494 | 0.53   |
|               | 0.528    | 0.544 | 0.486 | 0.527 | 0.553  |
| GSK-3a/b S21  | 0.567    | 0.565 | 0.536 | 0.54  | 0.522  |
|               | 0.559    | 0.579 | 0.541 | 0.485 | 0.532  |
|               | 0.546    | 0.522 | 0.521 | 0.544 | 0.502  |
|               | 0.532    | 0.538 | 0.546 | 0.559 | 0.514  |
| RPS6 S235/S2  | 0.205    | 0.135 | 0.204 | 0.203 | 0.272  |
|               | 0.141    | 0.111 | 0.162 | 0.218 | 0.274  |
|               | 0.165    | 0.101 | 0.15  | 0.161 | 0.269  |
|               | 0.134    | 0.109 | 0.151 | 0.166 | 0.263  |
| RPS6 S240/S2  | 0.159    | 0.11  | 0.205 | 0.221 | 0.226  |
|               | 0.14     | 0.101 | 0.174 | 0.182 | 0.216  |

|              |       |       |       |       |       |
|--------------|-------|-------|-------|-------|-------|
|              | 0.158 | 0.094 | 0.165 | 0.181 | 0.21  |
|              | 0.137 | 0.104 | 0.156 | 0.185 | 0.203 |
| PKCb S660    | 0.557 | 0.548 | 0.545 | 0.669 | 0.888 |
|              | 0.575 | 0.569 | 0.565 | 0.745 | 0.93  |
|              | 0.574 | 0.574 | 0.565 | 0.682 | 0.886 |
|              | 0.574 | 0.571 | 0.598 | 0.71  | 0.903 |
| PKCd S643    | 0.643 | 0.663 | 0.602 | 0.605 | 0.637 |
|              | 0.618 | 0.671 | 0.671 | 0.665 | 0.688 |
|              | 0.623 | 0.649 | 0.627 | 0.608 | 0.639 |
|              | 0.644 | 0.659 | 0.654 | 0.655 | 0.636 |
| MARCKs S512, | 0.615 | 0.689 | 0.545 | 0.554 | 0.647 |
|              | 0.658 | 0.753 | 0.645 | 0.64  | 0.678 |
|              | 0.629 | 0.695 | 0.666 | 0.59  | 0.623 |
|              | 0.622 | 0.708 | 0.706 | 0.608 | 0.648 |
| CAMI S81     | 0.563 | 0.6   | 0.479 | 0.531 | 0.477 |
|              | 0.535 | 0.492 | 0.469 | 0.463 | 0.536 |
|              | 0.538 | 0.451 | 0.533 | 0.478 | 0.506 |
|              | 0.542 | 0.453 | 0.532 | 0.516 | 0.535 |
| RSK3 T356/S3 | 0.595 | 0.59  | 0.545 | 0.633 | 0.695 |
|              | 0.606 | 0.596 | 0.567 | 0.667 | 0.727 |
|              | 0.599 | 0.569 | 0.526 | 0.621 | 0.684 |
|              | 0.592 | 0.576 | 0.559 | 0.643 | 0.72  |
| RAF S289/S29 | 0.191 | 0.193 | 0.166 | 0.192 | 0.205 |
|              | 0.192 | 0.201 | 0.194 | 0.199 | 0.217 |
|              | 0.195 | 0.193 | 0.177 | 0.182 | 0.185 |
|              | 0.193 | 0.198 | 0.187 | 0.185 | 0.202 |
| MEK S217/S22 | 0.16  | 0.168 | 0.193 | 0.43  | 0.692 |
|              | 0.177 | 0.185 | 0.227 | 0.54  | 0.745 |
|              | 0.16  | 0.171 | 0.204 | 0.424 | 0.582 |
|              | 0.173 | 0.174 | 0.209 | 0.44  | 0.635 |
| ERK T202/Y20 | 0.384 | 0.344 | 0.418 | 0.801 | 1.039 |
|              | 0.376 | 0.359 | 0.453 | 0.894 | 0.876 |
|              | 0.393 | 0.333 | 0.418 | 0.748 | 0.936 |
|              | 0.374 | 0.331 | 0.442 | 0.811 | 0.976 |
| p90RSK S380  | 0.596 | 0.231 | 0.248 | 0.22  | 0.344 |
|              | 0.567 | 0.223 | 0.243 | 0.222 | 0.382 |
|              | 0.617 | 0.237 | 0.226 | 0.227 | 0.406 |
|              | 0.582 | 0.232 | 0.231 | 0.246 | 0.409 |
| STAT1 Y701   | 0.396 | 0.428 | 0.368 | 0.396 | 0.421 |

|               |          |       |       |        |        |
|---------------|----------|-------|-------|--------|--------|
|               | 0.388    | 0.448 | 0.412 | 0.442  | 0.476  |
|               | 0.38     | 0.432 | 0.391 | 0.408  | 0.425  |
|               | 0.403    | 0.422 | 0.402 | 0.406  | 0.44   |
| STAT3 Y705    | 0.547    | 0.573 | 0.566 | 0.574  | 0.637  |
|               | 0.541    | 0.602 | 0.55  | 0.566  | 0.647  |
|               | 0.566    | 0.597 | 0.57  | 0.591  | 0.656  |
|               | 0.566    | 0.611 | 0.578 | 0.58   | 0.654  |
| CREB S133     | 0.555    | 0.574 | 0.531 | 0.663  | 0.943  |
|               | 0.572    | 0.664 | 0.61  | 0.764  | 0.818  |
|               | 0.587    | 0.635 | 0.613 | 0.708  | 0.859  |
|               | 0.61     | 0.631 | 0.643 | 0.744  | 0.95   |
| NF-kB S536    | 0.623    | 0.627 | 0.601 | 0.656  | 0.705  |
|               | 0.623    | 0.636 | 0.626 | 0.66   | 0.694  |
|               | 0.634    | 0.631 | 0.633 | 0.66   | 0.7    |
|               | 0.635    | 0.621 | 0.64  | 0.657  | 0.692  |
| c-Jun S63     | 0.04     | 0.054 | 0.035 | 0.034  | 0.051  |
|               | 0.044    | 0.065 | 0.045 | 0.045  | 0.072  |
|               | 0.044    | 0.051 | 0.037 | 0.039  | 0.039  |
|               | 0.05     | 0.055 | 0.051 | 0.042  | 0.046  |
|               | RAS pool |       |       |        |        |
| PDGFRb Y771   | 0.272    | 0.292 | 0.317 | 0.332  | 0.335  |
|               | 0.297    | 0.312 | 0.349 | 0.325  | 0.326  |
|               | 0.262    | 0.281 | 0.319 | 0.317  | 0.322  |
|               | 0.267    | 0.32  | 0.369 | 0.394  | 0.321  |
| SHC Y317      | 0.473    | 0.493 | 0.514 | 0.544  | 0.58   |
|               | 0.494    | 0.533 | 0.553 | 0.574  | 0.5753 |
|               | 0.46     | 0.494 | 0.532 | 0.559  | 0.567  |
|               | 0.483    | 0.521 | 0.562 | 0.573  | 0.579  |
| c-Cbl Y774    | 0.438    | 0.413 | 0.418 | 0.43   | 0.428  |
|               | 0.404    | 0.396 | 0.408 | 0.401  | 0.4    |
|               | 0.431    | 0.416 | 0.413 | 0.413  | 0.43   |
|               | 0.402    | 0.415 | 0.4   | 0.427  | 0.407  |
| Paxillin Y118 | 0.688    | 0.652 | 0.655 | 0.631  | 0.672  |
|               | 0.649    | 0.623 | 0.632 | 0.575  | 0.586  |
|               | 0.714    | 0.665 | 0.699 | 0.676  | 0.653  |
|               | 0.729    | 0.803 | 0.76  | 0.6273 | 0.694  |
| AKT S473      | 0.59     | 0.647 | 0.651 | 0.588  | 0.852  |

|              |       |       |       |        |        |
|--------------|-------|-------|-------|--------|--------|
|              | 0.497 | 0.566 | 0.469 | 0.513  | 0.683  |
|              | 0.568 | 0.609 | 0.646 | 0.682  | 0.87   |
|              | 0.533 | 0.643 | 0.638 | 0.658  | 0.831  |
| GSK-3a/b S21 | 0.503 | 0.49  | 0.487 | 0.63   | 0.712  |
|              | 0.507 | 0.555 | 0.566 | 0.555  | 0.575  |
|              | 0.546 | 0.586 | 0.555 | 0.652  | 0.62   |
|              | 0.496 | 0.527 | 0.783 | 0.6123 | 0.581  |
| RPS6 S235/S2 | 0.1   | 0.127 | 0.136 | 0.171  | 0.213  |
|              | 0.103 | 0.132 | 0.147 | 0.166  | 0.2    |
|              | 0.123 | 0.127 | 0.145 | 0.181  | 0.221  |
|              | 0.115 | 0.126 | 0.157 | 0.188  | 0.223  |
| RPS6 S240/S2 | 0.09  | 0.1   | 0.118 | 0.146  | 0.119  |
|              | 0.083 | 0.11  | 0.139 | 0.154  | 0.126  |
|              | 0.081 | 0.096 | 0.112 | 0.142  | 0.145  |
|              | 0.08  | 0.086 | 0.11  | 0.149  | 0.14   |
| PKCb S660    | 0.579 | 0.578 | 0.653 | 0.702  | 0.883  |
|              | 0.594 | 0.603 | 0.689 | 0.722  | 0.956  |
|              | 0.582 | 0.566 | 0.657 | 0.666  | 0.835  |
|              | 0.573 | 0.575 | 0.68  | 0.778  | 0.826  |
| PKCd S643    | 0.714 | 0.713 | 0.706 | 0.701  | 0.747  |
|              | 0.723 | 0.777 | 0.759 | 0.697  | 0.7357 |
|              | 0.669 | 0.692 | 0.709 | 0.672  | 0.729  |
|              | 0.7   | 0.734 | 0.733 | 0.657  | 0.731  |
| MARCKs S512, | 0.595 | 0.586 | 0.607 | 0.686  | 0.759  |
|              | 0.546 | 0.586 | 0.608 | 0.608  | 0.694  |
|              | 0.603 | 0.677 | 0.755 | 0.858  | 0.733  |
|              | 0.812 | 0.891 | 0.871 | 0.819  | 0.917  |
| CAMI S81     | 0.415 | 0.394 | 0.468 | 0.501  | 0.419  |
|              | 0.52  | 0.542 | 0.516 | 0.52   | 0.626  |
|              | 0.468 | 0.445 | 0.488 | 0.521  | 0.443  |
|              | 0.541 | 0.562 | 0.603 | 0.514  | 0.529  |
| RSK3 T356/S3 | 0.597 | 0.563 | 0.623 | 0.665  | 0.836  |
|              | 0.538 | 0.523 | 0.596 | 0.588  | 0.78   |
|              | 0.55  | 0.563 | 0.71  | 0.68   | 0.788  |
|              | 0.591 | 0.623 | 0.631 | 0.694  | 0.855  |
| RAF S289/S29 | 0.193 | 0.186 | 0.189 | 0.188  | 0.206  |
|              | 0.184 | 0.181 | 0.185 | 0.17   | 0.19   |
|              | 0.187 | 0.176 | 0.189 | 0.161  | 0.205  |
|              | 0.155 | 0.149 | 0.146 | 0.206  | 0.156  |

|              |           |       |        |       |       |
|--------------|-----------|-------|--------|-------|-------|
| MEK S217/S22 | 0.178     | 0.192 | 0.408  | 0.573 | 0.88  |
|              | 0.17      | 0.176 | 0.362  | 0.453 | 0.693 |
|              | 0.191     | 0.208 | 0.443  | 0.536 | 0.796 |
|              | 0.179     | 0.19  | 0.429  | 0.532 | 0.712 |
| ERK T202/Y20 | 0.377     | 0.342 | 0.651  | 0.847 | 1.012 |
|              | 0.335     | 0.317 | 0.589  | 0.692 | 0.826 |
|              | 0.363     | 0.332 | 0.689  | 0.84  | 0.986 |
|              | 0.36      | 0.343 | 0.617  | 0.782 | 0.856 |
| p90RSK S380  | 0.374     | 0.301 | 0.277  | 0.383 | 0.405 |
|              | 0.458     | 0.281 | 0.286  | 0.377 | 0.371 |
|              | 0.393     | 0.296 | 0.293  | 0.374 | 0.411 |
|              | 0.417     | 0.298 | 0.304  | 0.407 | 0.379 |
| STAT1 Y701   | 0.383     | 0.391 | 0.434  | 0.42  | 0.435 |
|              | 0.413     | 0.436 | 0.471  | 0.436 | 0.449 |
|              | 0.375     | 0.395 | 0.441  | 0.413 | 0.447 |
|              | 0.398     | 0.417 | 0.459  | 0.455 | 0.465 |
| STAT3 Y705   | 0.626     | 0.606 | 0.581  | 0.597 | 0.643 |
|              | 0.625     | 0.65  | 0.662  | 0.606 | 0.731 |
|              | 0.638     | 0.62  | 0.6    | 0.599 | 0.667 |
|              | 0.684     | 0.664 | 0.732  | 0.704 | 0.677 |
| CREB S133    | 0.71      | 0.598 | 0.804  | 0.928 | 1.032 |
|              | 0.773     | 0.717 | 0.916  | 0.933 | 1.224 |
|              | 0.735     | 0.64  | 0.854  | 0.888 | 0.955 |
|              | 0.749     | 0.686 | 0.826  | 0.877 | 0.954 |
| NF-kB S536   | 0.7527    | 0.775 | 0.833  | 0.858 | 0.988 |
|              | 0.733     | 0.725 | 0.797  | 0.796 | 0.901 |
|              | 0.764     | 0.788 | 0.84   | 0.849 | 0.954 |
|              | 0.761     | 0.784 | 0.856  | 0.89  | 0.933 |
| c-Jun S63    | 0.061     | 0.065 | 0.057  | 0.06  | 0.077 |
|              | 0.051     | 0.057 | 0.056  | 0.05  | 0.054 |
|              | 0.057     | 0.062 | 0.062  | 0.06  | 0.07  |
|              | 0.054     | 0.069 | 0.0583 | 0.06  | 0.071 |
| PDGFRb Y771  | A-RAF sh1 |       |        |       |       |
|              | 0.312     | 0.308 | 0.29   | 0.294 | 0.296 |
|              | 0.314     | 0.312 | 0.295  | 0.289 | 0.292 |
|              | 0.308     | 0.296 | 0.281  | 0.286 | 0.292 |
|              | 0.296     | 0.306 | 0.286  | 0.276 | 0.28  |

|               |        |       |       |       |       |
|---------------|--------|-------|-------|-------|-------|
| SHC Y317      | 0.473  | 0.546 | 0.537 | 0.577 | 0.539 |
|               | 0.458  | 0.538 | 0.553 | 0.59  | 0.534 |
|               | 0.493  | 0.535 | 0.525 | 0.563 | 0.538 |
|               | 0.475  | 0.568 | 0.54  | 0.562 | 0.518 |
| c-Cbl Y774    | 0.419  | 0.423 | 0.419 | 0.409 | 0.423 |
|               | 0.421  | 0.429 | 0.417 | 0.399 | 0.413 |
|               | 0.423  | 0.423 | 0.416 | 0.393 | 0.416 |
|               | 0.401  | 0.417 | 0.411 | 0.396 | 0.41  |
| Paxillin Y118 | 0.702  | 0.679 | 0.693 | 0.69  | 0.685 |
|               | 0.705  | 0.685 | 0.695 | 0.686 | 0.687 |
|               | 0.702  | 0.685 | 0.681 | 0.683 | 0.682 |
|               | 0.684  | 0.696 | 0.685 | 0.69  | 0.675 |
| AKT S473      | 0.644  | 0.534 | 0.69  | 0.634 | 0.677 |
|               | 0.616  | 0.64  | 0.705 | 0.59  | 0.624 |
|               | 0.616  | 0.645 | 0.681 | 0.565 | 0.642 |
|               | 0.591  | 0.608 | 0.662 | 0.577 | 0.585 |
| GSK-3a/b S21  | 0.673  | 0.723 | 0.652 | 0.758 | 0.758 |
|               | 0.65   | 0.705 | 0.675 | 0.774 | 0.712 |
|               | 0.693  | 0.697 | 0.641 | 0.611 | 0.618 |
|               | 0.685  | 0.725 | 0.62  | 0.607 | 0.57  |
| RPS6 S235/S2  | 0.136  | 0.085 | 0.086 | 0.13  | 0.287 |
|               | 0.101  | 0.071 | 0.084 | 0.143 | 0.28  |
|               | 0.118  | 0.096 | 0.106 | 0.132 | 0.299 |
|               | 0.122  | 0.098 | 0.109 | 0.186 | 0.309 |
| RPS6 S240/S2  | 0.1327 | 0.11  | 0.104 | 0.138 | 0.195 |
|               | 0.121  | 0.095 | 0.101 | 0.152 | 0.2   |
|               | 0.14   | 0.12  | 0.121 | 0.147 | 0.194 |
|               | 0.137  | 0.12  | 0.123 | 0.158 | 0.177 |
| PKCb S660     | 0.568  | 0.549 | 0.615 | 0.878 | 1.088 |
|               | 0.563  | 0.557 | 0.608 | 0.886 | 1.033 |
|               | 0.5647 | 0.563 | 0.579 | 0.813 | 1.053 |
|               | 0.563  | 0.567 | 0.583 | 0.861 | 0.984 |
| PKCd S643     | 0.731  | 0.693 | 0.674 | 0.684 | 0.649 |
|               | 0.728  | 0.701 | 0.693 | 0.692 | 0.646 |
|               | 0.727  | 0.679 | 0.664 | 0.665 | 0.647 |
|               | 0.718  | 0.702 | 0.666 | 0.657 | 0.627 |
| MARCKs S512,  | 0.75   | 0.758 | 0.756 | 0.816 | 0.733 |
|               | 0.742  | 0.811 | 0.832 | 0.766 | 0.68  |
|               | 0.728  | 0.735 | 0.767 | 0.771 | 0.695 |
|               | 0.724  | 0.788 | 0.755 | 0.76  | 0.663 |

|              |       |       |        |        |       |
|--------------|-------|-------|--------|--------|-------|
| CAMI S81     | 0.52  | 0.56  | 0.465  | 0.556  | 0.577 |
|              | 0.526 | 0.558 | 0.501  | 0.537  | 0.529 |
|              | 0.512 | 0.522 | 0.445  | 0.49   | 0.494 |
|              | 0.463 | 0.545 | 0.454  | 0.504  | 0.488 |
| RSK3 T356/S3 | 0.559 | 0.604 | 0.567  | 0.66   | 0.744 |
|              | 0.562 | 0.609 | 0.611  | 0.67   | 0.73  |
|              | 0.558 | 0.619 | 0.573  | 0.651  | 0.739 |
|              | 0.548 | 0.61  | 0.575  | 0.635  | 0.697 |
| RAF S289/S29 | 0.102 | 0.105 | 0.1    | 0.108  | 0.109 |
|              | 0.102 | 0.105 | 0.103  | 0.098  | 0.101 |
|              | 0.097 | 0.096 | 0.101  | 0.099  | 0.111 |
|              | 0.09  | 0.096 | 0.1    | 0.1    | 0.091 |
| MEK S217/S2  | 0.096 | 0.089 | 0.111  | 0.275  | 0.445 |
|              | 0.088 | 0.088 | 0.15   | 0.278  | 0.361 |
|              | 0.085 | 0.092 | 0.12   | 0.296  | 0.406 |
|              | 0.095 | 0.097 | 0.119  | 0.3    | 0.36  |
| ERK T202/Y20 | 0.232 | 0.195 | 0.243  | 0.435  | 0.546 |
|              | 0.198 | 0.197 | 0.269  | 0.654  | 0.505 |
|              | 0.216 | 0.191 | 0.246  | 0.383  | 0.53  |
|              | 0.18  | 0.205 | 0.247  | 0.418  | 0.458 |
| p90RSK S380  | 0.379 | 0.141 | 0.128  | 0.1    | 0.187 |
|              | 0.332 | 0.135 | 0.133  | 0.135  | 0.219 |
|              | 0.24  | 0.128 | 0.154  | 0.135  | 0.218 |
|              | 0.215 | 0.14  | 0.1383 | 0.131  | 0.268 |
| STAT1 Y701   | 0.389 | 0.411 | 0.425  | 0.423  | 0.456 |
|              | 0.378 | 0.414 | 0.442  | 0.428  | 0.452 |
|              | 0.379 | 0.402 | 0.41   | 0.429  | 0.475 |
|              | 0.363 | 0.417 | 0.419  | 0.428  | 0.466 |
| STAT3 Y705   | 0.616 | 0.615 | 0.605  | 0.618  | 0.598 |
|              | 0.604 | 0.605 | 0.595  | 0.6053 | 0.602 |
|              | 0.614 | 0.589 | 0.571  | 0.596  | 0.595 |
|              | 0.594 | 0.609 | 0.591  | 0.602  | 0.589 |
| CREB S133    | 0.602 | 0.54  | 0.627  | 0.83   | 0.921 |
|              | 0.617 | 0.611 | 0.692  | 0.802  | 0.864 |
|              | 0.622 | 0.544 | 0.624  | 0.779  | 0.854 |
|              | 0.552 | 0.639 | 0.641  | 0.822  | 0.847 |
| NF-kB S536   | 0.657 | 0.678 | 0.671  | 0.842  | 0.85  |
|              | 0.663 | 0.67  | 0.724  | 0.784  | 0.751 |
|              | 0.681 | 0.71  | 0.704  | 0.805  | 0.832 |

|               |           |       |       |       |        |
|---------------|-----------|-------|-------|-------|--------|
|               | 0.634     | 0.707 | 0.703 | 0.823 | 0.801  |
| c-Jun S63     | 0.044     | 0.045 | 0.035 | 0.038 | 0.0483 |
|               | 0.044     | 0.042 | 0.044 | 0.038 | 0.037  |
|               | 0.044     | 0.048 | 0.042 | 0.045 | 0.057  |
|               | 0.044     | 0.045 | 0.044 | 0.046 | 0.051  |
|               | A-RAF sh4 |       |       |       |        |
| PDGFRb Y771   | 0.318     | 0.325 | 0.329 | 0.323 | 0.328  |
|               | 0.321     | 0.324 | 0.329 | 0.313 | 0.309  |
|               | 0.341     | 0.33  | 0.334 | 0.324 | 0.323  |
|               | 0.335     | 0.332 | 0.33  | 0.324 | 0.314  |
| SHC Y317      | 0.526     | 0.595 | 0.564 | 0.589 | 0.617  |
|               | 0.546     | 0.573 | 0.576 | 0.565 | 0.565  |
|               | 0.526     | 0.58  | 0.574 | 0.564 | 0.581  |
|               | 0.504     | 0.575 | 0.55  | 0.56  | 0.55   |
| c-Cbl Y774    | 0.334     | 0.385 | 0.377 | 0.383 | 0.389  |
|               | 0.361     | 0.382 | 0.38  | 0.345 | 0.36   |
|               | 0.468     | 0.461 | 0.445 | 0.436 | 0.444  |
|               | 0.431     | 0.46  | 0.428 | 0.423 | 0.427  |
| Paxillin Y118 | 0.648     | 0.691 | 0.624 | 0.65  | 0.638  |
|               | 0.657     | 0.644 | 0.614 | 0.584 | 0.58   |
|               | 0.766     | 0.755 | 0.711 | 0.725 | 0.713  |
|               | 0.756     | 0.742 | 0.686 | 0.723 | 0.691  |
| AKT S473      | 0.518     | 0.601 | 0.577 | 0.53  | 0.632  |
|               | 0.532     | 0.525 | 0.582 | 0.631 | 0.581  |
|               | 0.631     | 0.69  | 0.649 | 0.701 | 0.636  |
|               | 0.604     | 0.622 | 0.632 | 0.714 | 0.766  |
| GSK-3a/b S21  | 0.522     | 0.522 | 0.512 | 0.556 | 0.642  |
|               | 0.54      | 0.504 | 0.531 | 0.541 | 0.623  |
|               | 0.685     | 0.655 | 0.577 | 0.604 | 0.692  |
|               | 0.626     | 0.603 | 0.565 | 0.627 | 0.685  |
| RPS6 S235/S2  | 0.075     | 0.063 | 0.081 | 0.148 | 0.264  |
|               | 0.084     | 0.059 | 0.07  | 0.154 | 0.248  |
|               | 0.146     | 0.101 | 0.119 | 0.175 | 0.303  |
|               | 0.148     | 0.12  | 0.131 | 0.215 | 0.344  |
| RPS6 S240/S2  | 0.124     | 0.086 | 0.114 | 0.184 | 0.232  |
|               | 0.114     | 0.082 | 0.102 | 0.174 | 0.233  |
|               | 0.204     | 0.134 | 0.148 | 0.178 | 0.241  |

|              |       |        |       |       |       |
|--------------|-------|--------|-------|-------|-------|
|              | 0.19  | 0.147  | 0.151 | 0.202 | 0.248 |
| PKCb S660    | 0.617 | 0.6193 | 0.604 | 0.812 | 1.081 |
|              | 0.604 | 0.618  | 0.597 | 0.838 | 1.02  |
|              | 0.602 | 0.605  | 0.586 | 0.759 | 1.027 |
|              | 0.579 | 0.635  | 0.597 | 0.807 | 0.988 |
| PKCd S643    | 0.781 | 0.738  | 0.725 | 0.758 | 0.747 |
|              | 0.791 | 0.751  | 0.731 | 0.751 | 0.743 |
|              | 0.769 | 0.754  | 0.722 | 0.744 | 0.76  |
|              | 0.764 | 0.729  | 0.697 | 0.741 | 0.738 |
| MARCKs S512, | 0.597 | 0.648  | 0.583 | 0.606 | 0.551 |
|              | 0.625 | 0.625  | 0.583 | 0.556 | 0.5   |
|              | 0.624 | 0.609  | 0.555 | 0.611 | 0.54  |
|              | 0.598 | 0.661  | 0.513 | 0.579 | 0.518 |
| CAMI S81     | 0.869 | 0.759  | 0.764 | 0.755 | 0.81  |
|              | 0.967 | 0.82   | 0.713 | 0.664 | 0.765 |
|              | 0.89  | 0.754  | 0.605 | 0.626 | 0.642 |
|              | 0.758 | 0.662  | 0.59  | 0.591 | 0.621 |
| RSK3 T356/S3 | 0.563 | 0.575  | 0.569 | 0.636 | 0.735 |
|              | 0.572 | 0.556  | 0.566 | 0.591 | 0.694 |
|              | 0.666 | 0.658  | 0.649 | 0.693 | 0.824 |
|              | 0.661 | 0.648  | 0.634 | 0.697 | 0.786 |
| RAF S289/S29 | 0.09  | 0.103  | 0.093 | 0.097 | 0.107 |
|              | 0.1   | 0.089  | 0.095 | 0.088 | 0.096 |
|              | 0.119 | 0.112  | 0.113 | 0.114 | 0.122 |
|              | 0.111 | 0.11   | 0.106 | 0.109 | 0.104 |
| MEK S217/S21 | 0.074 | 0.086  | 0.099 | 0.234 | 0.24  |
|              | 0.079 | 0.078  | 0.118 | 0.216 | 0.234 |
|              | 0.111 | 0.108  | 0.123 | 0.302 | 0.439 |
|              | 0.11  | 0.106  | 0.119 | 0.329 | 0.359 |
| ERK T202/Y20 | 0.17  | 0.187  | 0.231 | 0.449 | 0.319 |
|              | 0.178 | 0.159  | 0.231 | 0.433 | 0.478 |
|              | 0.253 | 0.235  | 0.257 | 0.455 | 0.618 |
|              | 0.219 | 0.221  | 0.266 | 0.544 | 0.573 |
| p90RSK S380  | 0.031 | 0.13   | 0.158 | 0.14  | 0.191 |
|              | 0.024 | 0.157  | 0.15  | 0.155 | 0.22  |
|              | 0.349 | 0.19   | 0.196 | 0.212 | 0.354 |
|              | 0.36  | 0.208  | 0.209 | 0.255 | 0.443 |
| STAT1 Y701   | 0.428 | 0.4545 | 0.481 | 0.523 | 0.53  |
|              | 0.444 | 0.481  | 0.477 | 0.525 | 0.478 |

|               |           |        |       |        |        |
|---------------|-----------|--------|-------|--------|--------|
|               | 0.426     | 0.4545 | 0.433 | 0.472  | 0.469  |
|               | 0.4327    | 0.428  | 0.429 | 0.476  | 0.466  |
| STAT3 Y705    | 0.648     | 0.627  | 0.638 | 0.612  | 0.6173 |
|               | 0.64      | 0.623  | 0.632 | 0.606  | 0.612  |
|               | 0.623     | 0.615  | 0.63  | 0.599  | 0.63   |
|               | 0.617     | 0.631  | 0.609 | 0.6057 | 0.61   |
| CREB S133     | 0.577     | 0.548  | 0.617 | 0.745  | 0.845  |
|               | 0.593     | 0.582  | 0.639 | 0.751  | 0.808  |
|               | 0.594     | 0.531  | 0.622 | 0.734  | 0.801  |
|               | 0.587     | 0.635  | 0.609 | 0.75   | 0.79   |
| NF-kB S536    | 0.636     | 0.669  | 0.628 | 0.75   | 0.821  |
|               | 0.601     | 0.63   | 0.644 | 0.768  | 0.763  |
|               | 0.683     | 0.708  | 0.688 | 0.796  | 0.902  |
|               | 0.68      | 0.716  | 0.7   | 0.82   | 0.823  |
| c-Jun S63     | 0.03      | 0.037  | 0.037 | 0.029  | 0.042  |
|               | 0.037     | 0.035  | 0.033 | 0.03   | 0.039  |
|               | 0.039     | 0.042  | 0.037 | 0.033  | 0.048  |
|               | 0.035     | 0.04   | 0.032 | 0.032  | 0.038  |
|               | B-RAF sh1 |        |       |        |        |
| PDGFRb Y771   | 0.286     | 0.286  | 0.274 | 0.294  | 0.239  |
|               | 0.293     | 0.293  | 0.273 | 0.291  | 0.261  |
|               | 0.299     | 0.301  | 0.277 | 0.291  | 0.256  |
|               | 0.298     | 0.301  | 0.281 | 0.295  | 0.258  |
| SHC Y317      | 0.392     | 0.445  | 0.431 | 0.476  | 0.434  |
|               | 0.401     | 0.461  | 0.443 | 0.48   | 0.494  |
|               | 0.43      | 0.498  | 0.478 | 0.517  | 0.512  |
|               | 0.417     | 0.499  | 0.492 | 0.535  | 0.529  |
| c-Cbl Y774    | 0.395     | 0.421  | 0.392 | 0.416  | 0.375  |
|               | 0.395     | 0.47   | 0.416 | 0.428  | 0.416  |
|               | 0.396     | 0.446  | 0.41  | 0.4227 | 0.413  |
|               | 0.42      | 0.438  | 0.411 | 0.424  | 0.418  |
| Paxillin Y118 | 0.728     | 0.692  | 0.7   | 0.714  | 0.7317 |
|               | 0.725     | 0.7063 | 0.729 | 0.706  | 0.727  |
|               | 0.754     | 0.714  | 0.719 | 0.722  | 0.744  |
|               | 0.775     | 0.713  | 0.729 | 0.714  | 0.724  |
| AKT S473      | 0.617     | 0.547  | 0.496 | 0.66   | 0.535  |
|               | 0.461     | 0.503  | 0.572 | 0.643  | 0.733  |

|              |       |        |       |       |        |
|--------------|-------|--------|-------|-------|--------|
|              | 0.592 | 0.559  | 0.653 | 0.681 | 0.726  |
|              | 0.601 | 0.527  | 0.518 | 0.617 | 0.679  |
| GSK-3a/b S21 | 0.619 | 0.538  | 0.64  | 0.602 | 0.635  |
|              | 0.513 | 0.533  | 0.56  | 0.591 | 0.626  |
|              | 0.517 | 0.583  | 0.634 | 0.622 | 0.621  |
|              | 0.501 | 0.559  | 0.545 | 0.612 | 0.625  |
| RPS6 S235/S2 | 0.133 | 0.079  | 0.093 | 0.146 | 0.278  |
|              | 0.118 | 0.077  | 0.098 | 0.159 | 0.367  |
|              | 0.155 | 0.109  | 0.117 | 0.16  | 0.388  |
|              | 0.131 | 0.106  | 0.123 | 0.159 | 0.392  |
| RPS6 S240/S2 | 0.108 | 0.068  | 0.087 | 0.146 | 0.196  |
|              | 0.097 | 0.063  | 0.088 | 0.155 | 0.189  |
|              | 0.125 | 0.099  | 0.112 | 0.166 | 0.201  |
|              | 0.116 | 0.1    | 0.125 | 0.136 | 0.203  |
| PKCb S660    | 0.543 | 0.519  | 0.535 | 0.854 | 0.82   |
|              | 0.557 | 0.522  | 0.545 | 0.844 | 0.95   |
|              | 0.576 | 0.551  | 0.55  | 0.89  | 1.03   |
|              | 0.595 | 0.555  | 0.559 | 0.868 | 1.01   |
| PKCd S643    | 0.604 | 0.596  | 0.593 | 0.575 | 0.574  |
|              | 0.598 | 0.598  | 0.598 | 0.611 | 0.626  |
|              | 0.651 | 0.607  | 0.609 | 0.608 | 0.608  |
|              | 0.665 | 0.612  | 0.608 | 0.608 | 0.626  |
| MARCKs S512, | 0.58  | 0.725  | 0.659 | 0.688 | 0.502  |
|              | 0.611 | 0.754  | 0.722 | 0.657 | 0.56   |
|              | 0.587 | 0.752  | 0.648 | 0.69  | 0.565  |
|              | 0.622 | 0.762  | 0.689 | 0.689 | 0.559  |
| CAMI S81     | 0.457 | 0.48   | 0.441 | 0.505 | 0.5233 |
|              | 0.468 | 0.492  | 0.482 | 0.514 | 0.529  |
|              | 0.48  | 0.529  | 0.476 | 0.52  | 0.514  |
|              | 0.495 | 0.5003 | 0.498 | 0.523 | 0.527  |
| RSK3 T356/S3 | 0.648 | 0.615  | 0.583 | 0.672 | 0.645  |
|              | 0.656 | 0.617  | 0.618 | 0.7   | 0.737  |
|              | 0.644 | 0.637  | 0.619 | 0.718 | 0.757  |
|              | 0.676 | 0.648  | 0.635 | 0.724 | 0.762  |
| RAF S289/S29 | 0.101 | 0.092  | 0.096 | 0.09  | 0.081  |
|              | 0.1   | 0.099  | 0.106 | 0.099 | 0.105  |
|              | 0.096 | 0.104  | 0.09  | 0.105 | 0.104  |
|              | 0.101 | 0.104  | 0.099 | 0.106 | 0.105  |
| MEK S217/S2: | 0.08  | 0.08   | 0.11  | 0.322 | 0.118  |

|              |           |       |       |       |       |
|--------------|-----------|-------|-------|-------|-------|
|              | 0.094     | 0.094 | 0.151 | 0.348 | 0.371 |
|              | 0.083     | 0.094 | 0.113 | 0.353 | 0.362 |
|              | 0.098     | 0.1   | 0.14  | 0.353 | 0.357 |
| ERK T202/Y20 | 0.209     | 0.187 | 0.224 | 0.511 | 0.363 |
|              | 0.183     | 0.181 | 0.269 | 0.569 | 0.47  |
|              | 0.214     | 0.204 | 0.209 | 0.543 | 0.623 |
|              | 0.19      | 0.206 | 0.255 | 0.557 | 0.658 |
| p90RSK S380  | 0.342     | 0.105 | 0.122 | 0.089 | 0.259 |
|              | 0.207     | 0.111 | 0.091 | 0.124 | 0.218 |
|              | 0.351     | 0.107 | 0.152 | 0.098 | 0.274 |
|              | 0.035     | 0.124 | 0.118 | 0.125 | 0.282 |
| STAT1 Y701   | 0.357     | 0.355 | 0.359 | 0.361 | 0.355 |
|              | 0.361     | 0.368 | 0.36  | 0.359 | 0.374 |
|              | 0.371     | 0.379 | 0.377 | 0.375 | 0.405 |
|              | 0.367     | 0.386 | 0.375 | 0.376 | 0.407 |
| STAT3 Y705   | 0.527     | 0.553 | 0.519 | 0.54  | 0.516 |
|              | 0.547     | 0.555 | 0.526 | 0.552 | 0.516 |
|              | 0.56      | 0.58  | 0.546 | 0.562 | 0.556 |
|              | 0.559     | 0.576 | 0.546 | 0.575 | 0.551 |
| CREB S133    | 0.489     | 0.485 | 0.508 | 0.698 | 0.549 |
|              | 0.496     | 0.55  | 0.592 | 0.738 | 0.781 |
|              | 0.48      | 0.506 | 0.541 | 0.755 | 0.786 |
|              | 0.506     | 0.604 | 0.617 | 0.779 | 0.832 |
| NF-kB S536   | 0.644     | 0.674 | 0.69  | 0.827 | 0.714 |
|              | 0.646     | 0.669 | 0.726 | 0.856 | 0.785 |
|              | 0.635     | 0.689 | 0.71  | 0.858 | 0.808 |
|              | 0.665     | 0.696 | 0.741 | 0.834 | 0.8   |
| c-Jun S63    | 0.067     | 0.064 | 0.048 | 0.042 | 0.036 |
|              | 0.071     | 0.057 | 0.05  | 0.044 | 0.054 |
|              | 0.043     | 0.054 | 0.036 | 0.05  | 0.05  |
|              | 0.052     | 0.06  | 0.049 | 0.061 | 0.06  |
|              | B-RAF sh4 |       |       |       |       |
| PDGFRb Y771  | 0.307     | 0.306 | 0.33  | 0.319 | 0.295 |
|              | 0.311     | 0.314 | 0.337 | 0.32  | 0.309 |
|              | 0.287     | 0.276 | 0.292 | 0.294 | 0.291 |
|              | 0.28      | 0.278 | 0.3   | 0.302 | 0.292 |
| SHC Y317     | 0.477     | 0.505 | 0.576 | 0.55  | 0.518 |

|               |       |        |        |       |       |
|---------------|-------|--------|--------|-------|-------|
|               | 0.481 | 0.527  | 0.585  | 0.56  | 0.551 |
|               | 0.442 | 0.482  | 0.529  | 0.498 | 0.508 |
|               | 0.445 | 0.489  | 0.531  | 0.52  | 0.507 |
| c-Cbl Y774    | 0.414 | 0.381  | 0.395  | 0.397 | 0.374 |
|               | 0.413 | 0.396  | 0.4    | 0.382 | 0.383 |
|               | 0.437 | 0.417  | 0.414  | 0.419 | 0.404 |
|               | 0.434 | 0.422  | 0.41   | 0.423 | 0.41  |
| Paxillin Y118 | 0.685 | 0.701  | 0.659  | 0.681 | 0.649 |
|               | 0.697 | 0.719  | 0.696  | 0.661 | 0.648 |
|               | 0.718 | 0.733  | 0.715  | 0.729 | 0.712 |
|               | 0.762 | 0.752  | 0.713  | 0.72  | 0.719 |
| AKT S473      | 0.537 | 0.55   | 0.533  | 0.515 | 0.531 |
|               | 0.514 | 0.551  | 0.5283 | 0.492 | 0.562 |
|               | 0.54  | 0.5505 | 0.524  | 0.506 | 0.569 |
|               | 0.553 | 0.5505 | 0.528  | 0.545 | 0.613 |
| GSK-3a/b S21  | 0.61  | 0.574  | 0.623  | 0.511 | 0.58  |
|               | 0.584 | 0.574  | 0.496  | 0.517 | 0.539 |
|               | 0.515 | 0.504  | 0.57   | 0.529 | 0.547 |
|               | 0.529 | 0.549  | 0.497  | 0.567 | 0.592 |
| RPS6 S235/S2  | 0.127 | 0.079  | 0.089  | 0.151 | 0.311 |
|               | 0.1   | 0.072  | 0.086  | 0.154 | 0.339 |
|               | 0.157 | 0.115  | 0.117  | 0.161 | 0.356 |
|               | 0.149 | 0.12   | 0.126  | 0.185 | 0.429 |
| RPS6 S240/S2  | 0.115 | 0.08   | 0.082  | 0.123 | 0.181 |
|               | 0.109 | 0.073  | 0.088  | 0.154 | 0.182 |
|               | 0.145 | 0.118  | 0.121  | 0.142 | 0.205 |
|               | 0.118 | 0.128  | 0.13   | 0.155 | 0.24  |
| PKCb S660     | 0.613 | 0.598  | 0.626  | 0.925 | 1.024 |
|               | 0.642 | 0.614  | 0.625  | 0.941 | 1.067 |
|               | 0.596 | 0.573  | 0.555  | 0.805 | 0.979 |
|               | 0.599 | 0.563  | 0.55   | 0.845 | 1.009 |
| PKCd S643     | 0.714 | 0.684  | 0.716  | 0.697 | 0.661 |
|               | 0.719 | 0.682  | 0.731  | 0.687 | 0.681 |
|               | 0.657 | 0.639  | 0.664  | 0.641 | 0.641 |
|               | 0.672 | 0.642  | 0.672  | 0.644 | 0.651 |
| MARCKs S512,  | 0.715 | 0.654  | 0.755  | 0.679 | 0.619 |
|               | 0.698 | 0.738  | 0.787  | 0.686 | 0.65  |
|               | 0.698 | 0.7    | 0.715  | 0.671 | 0.648 |
|               | 0.709 | 0.748  | 0.719  | 0.687 | 0.645 |

|              |       |       |       |       |       |
|--------------|-------|-------|-------|-------|-------|
| CAMI S81     | 0.585 | 0.505 | 0.543 | 0.556 | 0.517 |
|              | 0.573 | 0.519 | 0.593 | 0.58  | 0.563 |
|              | 0.502 | 0.468 | 0.497 | 0.487 | 0.497 |
|              | 0.512 | 0.49  | 0.504 | 0.51  | 0.507 |
| RSK3 T356/S3 | 0.565 | 0.587 | 0.602 | 0.619 | 0.608 |
|              | 0.562 | 0.59  | 0.625 | 0.673 | 0.707 |
|              | 0.559 | 0.603 | 0.615 | 0.67  | 0.703 |
|              | 0.566 | 0.607 | 0.616 | 0.676 | 0.712 |
| RAF S289/S29 | 0.097 | 0.097 | 0.097 | 0.103 | 0.093 |
|              | 0.1   | 0.096 | 0.104 | 0.094 | 0.103 |
|              | 0.106 | 0.105 | 0.099 | 0.103 | 0.108 |
|              | 0.105 | 0.109 | 0.101 | 0.105 | 0.111 |
| MEK S217/S2  | 0.088 | 0.079 | 0.118 | 0.265 | 0.204 |
|              | 0.081 | 0.088 | 0.15  | 0.327 | 0.337 |
|              | 0.083 | 0.092 | 0.108 | 0.281 | 0.34  |
|              | 0.102 | 0.103 | 0.123 | 0.343 | 0.385 |
| ERK T202/Y20 | 0.218 | 0.165 | 0.214 | 0.218 | 0.426 |
|              | 0.174 | 0.179 | 0.257 | 0.491 | 0.345 |
|              | 0.209 | 0.192 | 0.217 | 0.48  | 0.597 |
|              | 0.189 | 0.218 | 0.239 | 0.568 | 0.641 |
| p90RSK S380  | 0.308 | 0.124 | 0.125 | 0.12  | 0.243 |
|              | 0.265 | 0.124 | 0.125 | 0.138 | 0.269 |
|              | 0.33  | 0.123 | 0.118 | 0.112 | 0.193 |
|              | 0.083 | 0.127 | 0.132 | 0.123 | 0.293 |
| STAT1 Y701   | 0.424 | 0.429 | 0.425 | 0.453 | 0.424 |
|              | 0.41  | 0.432 | 0.457 | 0.464 | 0.477 |
|              | 0.406 | 0.39  | 0.415 | 0.409 | 0.429 |
|              | 0.399 | 0.389 | 0.423 | 0.423 | 0.436 |
| STAT3 Y705   | 0.587 | 0.612 | 0.569 | 0.596 | 0.597 |
|              | 0.601 | 0.618 | 0.572 | 0.599 | 0.603 |
|              | 0.558 | 0.578 | 0.539 | 0.559 | 0.576 |
|              | 0.564 | 0.578 | 0.531 | 0.556 | 0.578 |
| CREB S133    | 0.6   | 0.557 | 0.629 | 0.832 | 0.829 |
|              | 0.617 | 0.681 | 0.743 | 0.843 | 0.923 |
|              | 0.549 | 0.544 | 0.599 | 0.671 | 0.843 |
|              | 0.582 | 0.63  | 0.594 | 0.723 | 0.879 |
| NF-kB S536   | 0.648 | 0.665 | 0.707 | 0.764 | 0.717 |
|              | 0.635 | 0.682 | 0.713 | 0.783 | 0.716 |
|              | 0.645 | 0.702 | 0.71  | 0.795 | 0.763 |
|              | 0.656 | 0.711 | 0.705 | 0.806 | 0.798 |

|           |        |       |       |       |       |
|-----------|--------|-------|-------|-------|-------|
| c-Jun S63 | 0.043  | 0.041 | 0.05  | 0.044 | 0.044 |
|           | 0.04   | 0.041 | 0.047 | 0.045 | 0.052 |
|           | 0.06   | 0.062 | 0.065 | 0.063 | 0.066 |
|           | 0.0477 | 0.066 | 0.074 | 0.099 | 0.069 |

C-RAF sh3

|             |       |       |       |       |       |
|-------------|-------|-------|-------|-------|-------|
| PDGFRb Y771 | 0.29  | 0.303 | 0.295 | 0.301 | 0.291 |
|             | 0.292 | 0.31  | 0.317 | 0.306 | 0.302 |
|             | 0.287 | 0.312 | 0.303 | 0.306 | 0.293 |
|             | 0.291 | 0.312 | 0.31  | 0.305 | 0.295 |

|          |       |       |       |       |       |
|----------|-------|-------|-------|-------|-------|
| SHC Y317 | 0.409 | 0.471 | 0.511 | 0.551 | 0.519 |
|          | 0.452 | 0.487 | 0.539 | 0.563 | 0.539 |
|          | 0.412 | 0.496 | 0.514 | 0.536 | 0.538 |
|          | 0.439 | 0.497 | 0.549 | 0.564 | 0.54  |

|            |       |       |        |       |       |
|------------|-------|-------|--------|-------|-------|
| c-Cbl Y774 | 0.39  | 0.397 | 0.394  | 0.391 | 0.378 |
|            | 0.395 | 0.39  | 0.395  | 0.401 | 0.398 |
|            | 0.392 | 0.385 | 0.3933 | 0.383 | 0.379 |
|            | 0.384 | 0.388 | 0.391  | 0.391 | 0.377 |

|               |       |       |       |       |       |
|---------------|-------|-------|-------|-------|-------|
| Paxillin Y118 | 0.685 | 0.71  | 0.658 | 0.708 | 0.625 |
|               | 0.744 | 0.711 | 0.724 | 0.72  | 0.726 |
|               | 0.679 | 0.693 | 0.626 | 0.647 | 0.628 |
|               | 0.673 | 0.702 | 0.699 | 0.659 | 0.635 |

|          |       |       |       |       |       |
|----------|-------|-------|-------|-------|-------|
| AKT S473 | 0.535 | 0.513 | 0.634 | 0.608 | 0.577 |
|          | 0.486 | 0.605 | 0.559 | 0.548 | 0.622 |
|          | 0.512 | 0.501 | 0.559 | 0.529 | 0.557 |
|          | 0.495 | 0.514 | 0.525 | 0.599 | 0.554 |

|              |       |       |       |       |       |
|--------------|-------|-------|-------|-------|-------|
| GSK-3a/b S21 | 0.553 | 0.504 | 0.551 | 0.568 | 0.539 |
|              | 0.535 | 0.514 | 0.629 | 0.589 | 0.583 |
|              | 0.541 | 0.523 | 0.626 | 0.523 | 0.552 |
|              | 0.534 | 0.523 | 0.548 | 0.568 | 0.548 |

|              |       |       |       |       |       |
|--------------|-------|-------|-------|-------|-------|
| RPS6 S235/S2 | 0.167 | 0.096 | 0.113 | 0.174 | 0.293 |
|              | 0.142 | 0.091 | 0.13  | 0.185 | 0.322 |
|              | 0.158 | 0.121 | 0.128 | 0.169 | 0.327 |
|              | 0.143 | 0.119 | 0.139 | 0.18  | 0.334 |

|              |       |       |       |       |       |
|--------------|-------|-------|-------|-------|-------|
| RPS6 S240/S2 | 0.125 | 0.081 | 0.088 | 0.128 | 0.18  |
|              | 0.108 | 0.077 | 0.101 | 0.165 | 0.183 |
|              | 0.121 | 0.104 | 0.11  | 0.133 | 0.178 |
|              | 0.089 | 0.106 | 0.122 | 0.142 | 0.182 |

|                |       |       |       |       |        |
|----------------|-------|-------|-------|-------|--------|
| PKCb S660      | 0.6   | 0.592 | 0.6   | 1.04  | 1.045  |
|                | 0.596 | 0.589 | 0.613 | 1.024 | 1.048  |
|                | 0.614 | 0.612 | 0.579 | 0.992 | 1.073  |
|                | 0.622 | 0.596 | 0.595 | 1.047 | 1.09   |
| PKCd S643      | 0.633 | 0.593 | 0.631 | 0.663 | 0.604  |
|                | 0.638 | 0.6   | 0.685 | 0.677 | 0.657  |
|                | 0.67  | 0.65  | 0.667 | 0.666 | 0.649  |
|                | 0.672 | 0.643 | 0.671 | 0.667 | 0.661  |
| MARCKs S512    | 0.623 | 0.632 | 0.608 | 0.602 | 0.485  |
|                | 0.599 | 0.661 | 0.65  | 0.584 | 0.546  |
|                | 0.622 | 0.661 | 0.55  | 0.601 | 0.515  |
|                | 0.619 | 0.687 | 0.622 | 0.616 | 0.513  |
| CAMI S81       | 0.532 | 0.541 | 0.526 | 0.586 | 0.504  |
|                | 0.555 | 0.576 | 0.587 | 0.585 | 0.607  |
|                | 0.598 | 0.571 | 0.528 | 0.532 | 0.527  |
|                | 0.598 | 0.569 | 0.576 | 0.583 | 0.54   |
| RSK3 T356/S357 | 0.588 | 0.582 | 0.583 | 0.726 | 0.702  |
|                | 0.603 | 0.586 | 0.59  | 0.736 | 0.757  |
|                | 0.599 | 0.582 | 0.544 | 0.692 | 0.733  |
|                | 0.594 | 0.584 | 0.565 | 0.718 | 0.754  |
| RAF S289/S291  | 0.089 | 0.088 | 0.087 | 0.092 | 0.087  |
|                | 0.092 | 0.095 | 0.095 | 0.09  | 0.0865 |
|                | 0.091 | 0.086 | 0.082 | 0.084 | 0.086  |
|                | 0.088 | 0.093 | 0.091 | 0.089 | 0.0865 |
| MEK S217/S219  | 0.08  | 0.089 | 0.142 | 0.355 | 0.325  |
|                | 0.083 | 0.09  | 0.159 | 0.333 | 0.415  |
|                | 0.08  | 0.093 | 0.105 | 0.299 | 0.321  |
|                | 0.089 | 0.086 | 0.119 | 0.344 | 0.354  |
| ERK T202/Y204  | 0.203 | 0.186 | 0.25  | 0.581 | 0.605  |
|                | 0.188 | 0.183 | 0.272 | 0.555 | 0.468  |
|                | 0.191 | 0.19  | 0.208 | 0.464 | 0.564  |
|                | 0.166 | 0.172 | 0.222 | 0.374 | 0.392  |
| p90RSK S380    | 0.358 | 0.129 | 0.109 | 0.12  | 0.261  |
|                | 0.212 | 0.116 | 0.101 | 0.132 | 0.245  |
|                | 0.349 | 0.114 | 0.135 | 0.109 | 0.279  |
|                | 0.135 | 0.122 | 0.136 | 0.123 | 0.29   |
| STAT1 Y701     | 0.382 | 0.402 | 0.38  | 0.429 | 0.446  |
|                | 0.382 | 0.418 | 0.418 | 0.444 | 0.456  |
|                | 0.375 | 0.42  | 0.381 | 0.428 | 0.457  |

|               |           |       |       |       |        |
|---------------|-----------|-------|-------|-------|--------|
|               | 0.393     | 0.421 | 0.409 | 0.439 | 0.44   |
| STAT3 Y705    | 0.538     | 0.555 | 0.562 | 0.585 | 0.557  |
|               | 0.551     | 0.574 | 0.573 | 0.597 | 0.563  |
|               | 0.538     | 0.564 | 0.563 | 0.582 | 0.585  |
|               | 0.553     | 0.583 | 0.579 | 0.585 | 0.574  |
| CREB S133     | 0.615     | 0.586 | 0.677 | 0.779 | 0.885  |
|               | 0.627     | 0.667 | 0.735 | 0.8   | 0.961  |
|               | 0.652     | 0.697 | 0.675 | 0.804 | 0.933  |
|               | 0.65      | 0.68  | 0.745 | 0.862 | 0.976  |
| NF-kB S536    | 0.639     | 0.665 | 0.712 | 0.784 | 0.81   |
|               | 0.649     | 0.648 | 0.739 | 0.792 | 0.829  |
|               | 0.645     | 0.67  | 0.695 | 0.742 | 0.806  |
|               | 0.631     | 0.639 | 0.705 | 0.781 | 0.825  |
| c-Jun S63     | 0.057     | 0.049 | 0.049 | 0.053 | 0.051  |
|               | 0.062     | 0.057 | 0.064 | 0.062 | 0.077  |
|               | 0.061     | 0.06  | 0.051 | 0.052 | 0.059  |
|               | 0.063     | 0.068 | 0.065 | 0.064 | 0.067  |
|               | C-RAF sh5 |       |       |       |        |
| PDGFRb Y771   | 0.261     | 0.309 | 0.272 | 0.261 | 0.2757 |
|               | 0.285     | 0.309 | 0.285 | 0.287 | 0.282  |
|               | 0.279     | 0.302 | 0.267 | 0.29  | 0.27   |
|               | 0.278     | 0.313 | 0.274 | 0.282 | 0.275  |
| SHC Y317      | 0.367     | 0.464 | 0.467 | 0.488 | 0.405  |
|               | 0.384     | 0.469 | 0.47  | 0.502 | 0.504  |
|               | 0.378     | 0.454 | 0.427 | 0.483 | 0.473  |
|               | 0.369     | 0.466 | 0.449 | 0.492 | 0.522  |
| c-Cbl Y774    | 0.374     | 0.401 | 0.412 | 0.403 | 0.293  |
|               | 0.387     | 0.409 | 0.421 | 0.452 | 0.381  |
|               | 0.379     | 0.401 | 0.389 | 0.392 | 0.34   |
|               | 0.386     | 0.403 | 0.399 | 0.388 | 0.359  |
| Paxillin Y118 | 0.595     | 0.648 | 0.642 | 0.681 | 0.542  |
|               | 0.626     | 0.674 | 0.677 | 0.695 | 0.721  |
|               | 0.599     | 0.63  | 0.612 | 0.666 | 0.601  |
|               | 0.605     | 0.696 | 0.646 | 0.674 | 0.66   |
| AKT S473      | 0.453     | 0.513 | 0.547 | 0.601 | 0.437  |
|               | 0.408     | 0.527 | 0.586 | 0.613 | 0.529  |
|               | 0.447     | 0.481 | 0.472 | 0.637 | 0.569  |

|              |       |       |        |       |        |
|--------------|-------|-------|--------|-------|--------|
|              | 0.435 | 0.534 | 0.557  | 0.521 | 0.622  |
| GSK-3a/b S21 | 0.586 | 0.46  | 0.511  | 0.578 | 0.528  |
|              | 0.534 | 0.463 | 0.524  | 0.589 | 0.628  |
|              | 0.574 | 0.536 | 0.553  | 0.572 | 0.515  |
|              | 0.548 | 0.451 | 0.513  | 0.58  | 0.556  |
| RPS6 S235/S2 | 0.193 | 0.155 | 0.176  | 0.183 | 0.246  |
|              | 0.153 | 0.169 | 0.182  | 0.204 | 0.377  |
|              | 0.211 | 0.183 | 0.193  | 0.209 | 0.343  |
|              | 0.19  | 0.184 | 0.176  | 0.235 | 0.368  |
| RPS6 S240/S2 | 0.141 | 0.126 | 0.153  | 0.172 | 0.206  |
|              | 0.116 | 0.122 | 0.139  | 0.179 | 0.241  |
|              | 0.147 | 0.118 | 0.146  | 0.179 | 0.227  |
|              | 0.149 | 0.141 | 0.17   | 0.205 | 0.236  |
| PKCb S660    | 0.586 | 0.59  | 0.524  | 0.705 | 0.647  |
|              | 0.577 | 0.592 | 0.52   | 0.722 | 0.848  |
|              | 0.582 | 0.589 | 0.498  | 0.734 | 0.827  |
|              | 0.578 | 0.575 | 0.513  | 0.725 | 0.86   |
| PKCd S643    | 0.61  | 0.626 | 0.632  | 0.638 | 0.5923 |
|              | 0.623 | 0.629 | 0.634  | 0.64  | 0.599  |
|              | 0.619 | 0.617 | 0.604  | 0.627 | 0.578  |
|              | 0.611 | 0.615 | 0.616  | 0.632 | 0.6    |
| MARCKs S512, | 0.495 | 0.568 | 0.546  | 0.5   | 0.482  |
|              | 0.529 | 0.614 | 0.593  | 0.542 | 0.496  |
|              | 0.535 | 0.564 | 0.5703 | 0.563 | 0.461  |
|              | 0.546 | 0.565 | 0.572  | 0.573 | 0.489  |
| CAMI S81     | 0.524 | 0.532 | 0.507  | 0.523 | 0.5447 |
|              | 0.549 | 0.572 | 0.575  | 0.55  | 0.557  |
|              | 0.538 | 0.523 | 0.491  | 0.576 | 0.497  |
|              | 0.552 | 0.578 | 0.556  | 0.593 | 0.58   |
| RSK3 T356/S3 | 0.613 | 0.612 | 0.566  | 0.628 | 0.574  |
|              | 0.62  | 0.617 | 0.599  | 0.658 | 0.752  |
|              | 0.593 | 0.596 | 0.551  | 0.646 | 0.667  |
|              | 0.588 | 0.609 | 0.585  | 0.665 | 0.78   |
| RAF S289/S29 | 0.087 | 0.089 | 0.086  | 0.083 | 0.061  |
|              | 0.092 | 0.094 | 0.096  | 0.09  | 0.103  |
|              | 0.087 | 0.084 | 0.077  | 0.081 | 0.071  |
|              | 0.084 | 0.085 | 0.087  | 0.093 | 0.091  |
| MEK S217/S2  | 0.078 | 0.084 | 0.103  | 0.166 | 0.113  |
|              | 0.085 | 0.088 | 0.127  | 0.193 | 0.295  |

|              |          |        |        |       |        |
|--------------|----------|--------|--------|-------|--------|
|              | 0.071    | 0.075  | 0.084  | 0.2   | 0.175  |
|              | 0.077    | 0.08   | 0.098  | 0.217 | 0.262  |
| ERK T202/Y20 | 0.194    | 0.181  | 0.215  | 0.373 | 0.221  |
|              | 0.176    | 0.189  | 0.246  | 0.444 | 0.409  |
|              | 0.174    | 0.158  | 0.181  | 0.271 | 0.457  |
|              | 0.163    | 0.172  | 0.2    | 0.452 | 0.37   |
| p90RSK S380  | 0.396    | 0.102  | 0.121  | 0.105 | 0.223  |
|              | 0.285    | 0.093  | 0.104  | 0.126 | 0.132  |
|              | 0.284    | 0.115  | 0.129  | 0.088 | 0.247  |
|              | 0.3217   | 0.113  | 0.119  | 0.125 | 0.218  |
| STAT1 Y701   | 0.356    | 0.379  | 0.401  | 0.393 | 0.351  |
|              | 0.363    | 0.375  | 0.402  | 0.407 | 0.44   |
|              | 0.358    | 0.374  | 0.385  | 0.393 | 0.417  |
|              | 0.359    | 0.377  | 0.394  | 0.391 | 0.431  |
| STAT3 Y705   | 0.524    | 0.576  | 0.528  | 0.555 | 0.497  |
|              | 0.527    | 0.558  | 0.523  | 0.56  | 0.554  |
|              | 0.54     | 0.586  | 0.535  | 0.558 | 0.566  |
|              | 0.542    | 0.576  | 0.521  | 0.566 | 0.565  |
| CREB S133    | 0.509    | 0.469  | 0.564  | 0.653 | 0.6867 |
|              | 0.514    | 0.559  | 0.627  | 0.675 | 0.713  |
|              | 0.535    | 0.521  | 0.555  | 0.683 | 0.638  |
|              | 0.54     | 0.485  | 0.576  | 0.685 | 0.709  |
| NF-kB S536   | 0.675    | 0.667  | 0.704  | 0.78  | 0.751  |
|              | 0.673    | 0.683  | 0.718  | 0.776 | 0.768  |
|              | 0.661    | 0.65   | 0.672  | 0.789 | 0.729  |
|              | 0.649    | 0.642  | 0.671  | 0.742 | 0.756  |
| c-Jun S63    | 0.059    | 0.072  | 0.063  | 0.054 | 0.034  |
|              | 0.062    | 0.087  | 0.085  | 0.068 | 0.099  |
|              | 0.059    | 0.061  | 0.059  | 0.059 | 0.053  |
|              | 0.062    | 0.077  | 0.067  | 0.066 | 0.081  |
|              | RAF pool |        |        |       |        |
| PDGFRb Y771  | 0.318    | 0.3    | 0.313  | 0.325 | 0.304  |
|              | 0.308    | 0.318  | 0.313  | 0.307 | 0.307  |
|              | 0.307    | 0.298  | 0.321  | 0.322 | 0.325  |
|              | 0.309    | 0.3053 | 0.3157 | 0.31  | 0.327  |
| SHC Y317     | 0.519    | 0.546  | 0.518  | 0.556 | 0.525  |
|              | 0.523    | 0.562  | 0.542  | 0.533 | 0.544  |

|               |       |       |       |        |       |
|---------------|-------|-------|-------|--------|-------|
|               | 0.535 | 0.526 | 0.571 | 0.524  | 0.58  |
|               | 0.526 | 0.526 | 0.537 | 0.58   | 0.52  |
| c-Cbl Y774    | 0.423 | 0.41  | 0.385 | 0.436  | 0.382 |
|               | 0.447 | 0.425 | 0.405 | 0.447  | 0.393 |
|               | 0.434 | 0.418 | 0.42  | 0.44   | 0.409 |
|               | 0.433 | 0.42  | 0.405 | 0.437  | 0.396 |
| Paxillin Y118 | 0.656 | 0.646 | 0.566 | 0.608  | 0.572 |
|               | 0.671 | 0.682 | 0.588 | 0.618  | 0.584 |
|               | 0.72  | 0.734 | 0.697 | 0.676  | 0.696 |
|               | 0.818 | 0.767 | 0.705 | 0.711  | 0.743 |
| AKT S473      | 0.447 | 0.488 | 0.544 | 0.62   | 0.613 |
|               | 0.462 | 0.525 | 0.611 | 0.588  | 0.579 |
|               | 0.531 | 0.586 | 0.692 | 0.644  | 0.689 |
|               | 0.565 | 0.584 | 0.714 | 0.721  | 0.755 |
| GSK-3a/b S21  | 0.6   | 0.579 | 0.596 | 0.571  | 0.519 |
|               | 0.618 | 0.499 | 0.537 | 0.598  | 0.605 |
|               | 0.803 | 0.723 | 0.833 | 0.811  | 0.912 |
|               | 0.707 | 0.692 | 0.737 | 0.774  | 0.634 |
| RPS6 S235/S2  | 0.12  | 0.129 | 0.144 | 0.144  | 0.174 |
|               | 0.127 | 0.129 | 0.165 | 0.198  | 0.259 |
|               | 0.121 | 0.15  | 0.149 | 0.152  | 0.23  |
|               | 0.145 | 0.178 | 0.183 | 0.165  | 0.227 |
| RPS6 S240/S2  | 0.083 | 0.106 | 0.119 | 0.146  | 0.134 |
|               | 0.092 | 0.111 | 0.138 | 0.164  | 0.163 |
|               | 0.088 | 0.122 | 0.116 | 0.12   | 0.152 |
|               | 0.111 | 0.136 | 0.137 | 0.185  | 0.18  |
| PKCb S660     | 0.625 | 0.617 | 0.622 | 0.763  | 0.844 |
|               | 0.597 | 0.631 | 0.621 | 0.715  | 0.906 |
|               | 0.583 | 0.596 | 0.636 | 0.8    | 0.95  |
|               | 0.582 | 0.579 | 0.678 | 0.767  | 0.893 |
| PKCd S643     | 0.726 | 0.694 | 0.723 | 0.7257 | 0.712 |
|               | 0.714 | 0.719 | 0.716 | 0.744  | 0.714 |
|               | 0.698 | 0.661 | 0.688 | 0.71   | 0.707 |
|               | 0.651 | 0.645 | 0.706 | 0.723  | 0.711 |
| MARCKs S512,  | 0.584 | 0.571 | 0.542 | 0.616  | 0.572 |
|               | 0.59  | 0.621 | 0.592 | 0.606  | 0.61  |
|               | 0.748 | 0.83  | 0.906 | 0.762  | 0.846 |
|               | 0.873 | 0.826 | 0.838 | 0.89   | 0.891 |
| CAMI S81      | 0.552 | 0.464 | 0.46  | 0.493  | 0.494 |

|              |       |       |       |        |       |
|--------------|-------|-------|-------|--------|-------|
|              | 0.523 | 0.483 | 0.456 | 0.457  | 0.501 |
|              | 0.536 | 0.491 | 0.527 | 0.488  | 0.578 |
|              | 0.638 | 0.589 | 0.673 | 0.573  | 0.634 |
| RSK3 T356/S3 | 0.601 | 0.573 | 0.625 | 0.643  | 0.693 |
|              | 0.637 | 0.592 | 0.637 | 0.643  | 0.735 |
|              | 0.666 | 0.636 | 0.774 | 0.72   | 0.916 |
|              | 0.647 | 0.643 | 0.745 | 0.756  | 0.82  |
| RAF S289/S29 | 0.092 | 0.078 | 0.089 | 0.09   | 0.08  |
|              | 0.1   | 0.1   | 0.099 | 0.095  | 0.096 |
|              | 0.113 | 0.107 | 0.114 | 0.115  | 0.118 |
|              | 0.104 | 0.096 | 0.092 | 0.109  | 0.105 |
| MEK S217/S2  | 0.099 | 0.094 | 0.128 | 0.161  | 0.172 |
|              | 0.092 | 0.097 | 0.158 | 0.224  | 0.283 |
|              | 0.099 | 0.101 | 0.219 | 0.289  | 0.379 |
|              | 0.112 | 0.119 | 0.26  | 0.223  | 0.439 |
| ERK T202/Y20 | 0.207 | 0.204 | 0.251 | 0.371  | 0.413 |
|              | 0.204 | 0.198 | 0.281 | 0.358  | 0.533 |
|              | 0.188 | 0.183 | 0.382 | 0.418  | 0.455 |
|              | 0.195 | 0.174 | 0.352 | 0.478  | 0.703 |
| p90RSK S380  | 0.268 | 0.123 | 0.116 | 0.039  | 0.198 |
|              | 0.225 | 0.123 | 0.122 | 0.08   | 0.13  |
|              | 0.051 | 0.116 | 0.098 | 0.1427 | 0.144 |
|              | 0.084 | 0.155 | 0.134 | 0.309  | 0.197 |
| STAT1 Y701   | 0.377 | 0.376 | 0.389 | 0.416  | 0.412 |
|              | 0.381 | 0.379 | 0.4   | 0.414  | 0.423 |
|              | 0.403 | 0.427 | 0.447 | 0.405  | 0.469 |
|              | 0.391 | 0.391 | 0.444 | 0.428  | 0.436 |
| STAT3 Y705   | 0.605 | 0.632 | 0.618 | 0.642  | 0.617 |
|              | 0.605 | 0.672 | 0.596 | 0.59   | 0.622 |
|              | 0.613 | 0.658 | 0.661 | 0.619  | 0.634 |
|              | 0.637 | 0.667 | 0.706 | 0.674  | 0.667 |
| CREB S133    | 0.716 | 0.624 | 0.727 | 0.806  | 0.846 |
|              | 0.695 | 0.673 | 0.764 | 0.775  | 0.871 |
|              | 0.662 | 0.661 | 0.744 | 0.763  | 0.879 |
|              | 0.635 | 0.584 | 0.698 | 0.846  | 0.886 |
| NF-kB S536   | 0.702 | 0.76  | 0.829 | 0.914  | 0.925 |
|              | 0.727 | 0.765 | 0.881 | 0.918  | 1.048 |
|              | 0.777 | 0.783 | 0.913 | 0.928  | 1.042 |
|              | 0.801 | 0.892 | 0.967 | 0.912  | 1.049 |

|           |       |       |       |       |       |
|-----------|-------|-------|-------|-------|-------|
| c-Jun S63 | 0.055 | 0.061 | 0.048 | 0.057 | 0.062 |
|           | 0.057 | 0.072 | 0.061 | 0.06  | 0.07  |
|           | 0.058 | 0.068 | 0.069 | 0.065 | 0.075 |
|           | 0.068 | 0.078 | 0.08  | 0.07  | 0.072 |

MEK1 sh1

|             |       |       |       |       |       |
|-------------|-------|-------|-------|-------|-------|
| PDGFRb Y771 | 0.304 | 0.289 | 0.31  | 0.293 | 0.285 |
|             | 0.293 | 0.291 | 0.309 | 0.305 | 0.298 |
|             | 0.3   | 0.283 | 0.294 | 0.302 | 0.288 |
|             | 0.288 | 0.28  | 0.297 | 0.295 | 0.289 |

|          |       |       |       |       |       |
|----------|-------|-------|-------|-------|-------|
| SHC Y317 | 0.413 | 0.48  | 0.511 | 0.542 | 0.528 |
|          | 0.404 | 0.493 | 0.509 | 0.558 | 0.545 |
|          | 0.423 | 0.489 | 0.498 | 0.552 | 0.545 |
|          | 0.415 | 0.495 | 0.508 | 0.531 | 0.536 |

|            |       |       |       |        |       |
|------------|-------|-------|-------|--------|-------|
| c-Cbl Y774 | 0.448 | 0.434 | 0.431 | 0.402  | 0.399 |
|            | 0.445 | 0.423 | 0.409 | 0.399  | 0.404 |
|            | 0.45  | 0.427 | 0.402 | 0.3973 | 0.401 |
|            | 0.436 | 0.421 | 0.397 | 0.391  | 0.397 |

|               |       |       |       |       |       |
|---------------|-------|-------|-------|-------|-------|
| Paxillin Y118 | 0.737 | 0.683 | 0.692 | 0.677 | 0.663 |
|               | 0.753 | 0.697 | 0.669 | 0.675 | 0.676 |
|               | 0.761 | 0.708 | 0.676 | 0.684 | 0.675 |
|               | 0.76  | 0.709 | 0.662 | 0.66  | 0.668 |

|          |       |       |       |       |       |
|----------|-------|-------|-------|-------|-------|
| AKT S473 | 0.606 | 0.58  | 0.68  | 0.717 | 0.584 |
|          | 0.602 | 0.555 | 0.654 | 0.7   | 0.585 |
|          | 0.623 | 0.589 | 0.681 | 0.551 | 0.598 |
|          | 0.577 | 0.53  | 0.607 | 0.654 | 0.7   |

|              |       |       |       |       |       |
|--------------|-------|-------|-------|-------|-------|
| GSK-3a/b S21 | 0.605 | 0.578 | 0.603 | 0.619 | 0.677 |
|              | 0.589 | 0.595 | 0.603 | 0.682 | 0.699 |
|              | 0.648 | 0.625 | 0.651 | 0.542 | 0.59  |
|              | 0.63  | 0.619 | 0.595 | 0.632 | 0.656 |

|              |       |       |       |       |       |
|--------------|-------|-------|-------|-------|-------|
| RPS6 S235/S2 | 0.104 | 0.069 | 0.077 | 0.12  | 0.193 |
|              | 0.078 | 0.061 | 0.077 | 0.111 | 0.219 |
|              | 0.108 | 0.077 | 0.082 | 0.121 | 0.207 |
|              | 0.086 | 0.073 | 0.092 | 0.131 | 0.204 |

|              |       |       |       |       |       |
|--------------|-------|-------|-------|-------|-------|
| RPS6 S240/S2 | 0.111 | 0.083 | 0.097 | 0.137 | 0.164 |
|              | 0.094 | 0.075 | 0.097 | 0.13  | 0.17  |
|              | 0.124 | 0.093 | 0.105 | 0.134 | 0.157 |
|              | 0.097 | 0.089 | 0.109 | 0.144 | 0.156 |

|              |        |       |       |       |        |
|--------------|--------|-------|-------|-------|--------|
| PKCb S660    | 0.53   | 0.521 | 0.577 | 0.769 | 1.0517 |
|              | 0.524  | 0.514 | 0.561 | 0.795 | 1.055  |
|              | 0.563  | 0.533 | 0.54  | 0.756 | 1.061  |
|              | 0.55   | 0.531 | 0.534 | 0.753 | 1.039  |
| PKCd S643    | 0.692  | 0.693 | 0.687 | 0.695 | 0.659  |
|              | 0.673  | 0.698 | 0.676 | 0.705 | 0.69   |
|              | 0.68   | 0.673 | 0.651 | 0.688 | 0.688  |
|              | 0.66   | 0.687 | 0.652 | 0.657 | 0.667  |
| MARCKs S512, | 0.694  | 0.688 | 0.73  | 0.732 | 0.709  |
|              | 0.702  | 0.751 | 0.703 | 0.736 | 0.697  |
|              | 0.682  | 0.771 | 0.707 | 0.749 | 0.708  |
|              | 0.718  | 0.753 | 0.652 | 0.689 | 0.687  |
| CAMI S81     | 0.606  | 0.62  | 0.591 | 0.614 | 0.605  |
|              | 0.602  | 0.646 | 0.582 | 0.594 | 0.583  |
|              | 0.602  | 0.606 | 0.524 | 0.574 | 0.563  |
|              | 0.559  | 0.579 | 0.53  | 0.552 | 0.539  |
| RSK3 T356/S3 | 0.573  | 0.605 | 0.613 | 0.691 | 0.765  |
|              | 0.573  | 0.614 | 0.602 | 0.695 | 0.771  |
|              | 0.596  | 0.612 | 0.599 | 0.699 | 0.76   |
|              | 0.59   | 0.614 | 0.598 | 0.676 | 0.74   |
| RAF S289/S29 | 0.209  | 0.192 | 0.207 | 0.21  | 0.212  |
|              | 0.209  | 0.199 | 0.202 | 0.211 | 0.213  |
|              | 0.203  | 0.189 | 0.189 | 0.19  | 0.198  |
|              | 0.199  | 0.189 | 0.186 | 0.188 | 0.193  |
| MEK S217/S22 | 0.0803 | 0.077 | 0.094 | 0.159 | 0.191  |
|              | 0.084  | 0.079 | 0.097 | 0.179 | 0.201  |
|              | 0.073  | 0.086 | 0.104 | 0.193 | 0.239  |
|              | 0.084  | 0.084 | 0.074 | 0.154 | 0.205  |
| ERK T202/Y20 | 0.222  | 0.186 | 0.222 | 0.441 | 0.522  |
|              | 0.192  | 0.193 | 0.234 | 0.522 | 0.563  |
|              | 0.22   | 0.199 | 0.235 | 0.454 | 0.56   |
|              | 0.191  | 0.195 | 0.213 | 0.432 | 0.53   |
| p90RSK S380  | 0.349  | 0.182 | 0.118 | 0.132 | 0.159  |
|              | 0.337  | 0.151 | 0.134 | 0.115 | 0.197  |
|              | 0.244  | 0.124 | 0.13  | 0.128 | 0.203  |
|              | 0.165  | 0.134 | 0.135 | 0.129 | 0.2    |
| STAT1 Y701   | 0.407  | 0.382 | 0.416 | 0.42  | 0.424  |
|              | 0.403  | 0.388 | 0.415 | 0.431 | 0.45   |
|              | 0.401  | 0.363 | 0.398 | 0.425 | 0.438  |
|              | 0.378  | 0.376 | 0.401 | 0.424 | 0.439  |

|               |                    |        |       |       |       |
|---------------|--------------------|--------|-------|-------|-------|
| STAT3 Y705    | 0.61               | 0.599  | 0.617 | 0.58  | 0.622 |
|               | 0.596              | 0.596  | 0.605 | 0.579 | 0.657 |
|               | 0.616              | 0.582  | 0.584 | 0.575 | 0.647 |
|               | 0.578              | 0.595  | 0.583 | 0.569 | 0.653 |
| CREB S133     | 0.594              | 0.5753 | 0.655 | 0.741 | 0.877 |
|               | 0.605              | 0.549  | 0.666 | 0.76  | 0.919 |
|               | 0.623              | 0.593  | 0.601 | 0.744 | 0.877 |
|               | 0.591              | 0.584  | 0.607 | 0.73  | 0.861 |
| NF-kB S536    | 0.615              | 0.643  | 0.641 | 0.773 | 0.775 |
|               | 0.633              | 0.645  | 0.634 | 0.752 | 0.759 |
|               | 0.68               | 0.689  | 0.683 | 0.809 | 0.841 |
|               | 0.619              | 0.641  | 0.66  | 0.78  | 0.796 |
| c-Jun S63     | 0.035              | 0.035  | 0.038 | 0.034 | 0.045 |
|               | 0.034              | 0.04   | 0.036 | 0.036 | 0.046 |
|               | 0.036              | 0.0375 | 0.039 | 0.041 | 0.051 |
|               | 0.044              | 0.0375 | 0.04  | 0.036 | 0.052 |
| PDGFRb Y771   | MEK1 sh4<br>0.3023 | 0.299  | 0.321 | 0.284 | 0.332 |
|               | 0.3                | 0.315  | 0.313 | 0.298 | 0.319 |
|               | 0.309              | 0.331  | 0.319 | 0.284 | 0.317 |
|               | 0.298              | 0.325  | 0.319 | 0.299 | 0.321 |
| SHC Y317      | 0.472              | 0.481  | 0.529 | 0.502 | 0.574 |
|               | 0.425              | 0.514  | 0.53  | 0.559 | 0.566 |
|               | 0.451              | 0.519  | 0.535 | 0.49  | 0.546 |
|               | 0.438              | 0.532  | 0.525 | 0.533 | 0.518 |
| c-Cbl Y774    | 0.319              | 0.35   | 0.351 | 0.326 | 0.363 |
|               | 0.351              | 0.363  | 0.358 | 0.387 | 0.373 |
|               | 0.463              | 0.418  | 0.38  | 0.377 | 0.426 |
|               | 0.433              | 0.453  | 0.423 | 0.417 | 0.379 |
| Paxillin Y118 | 0.603              | 0.575  | 0.618 | 0.55  | 0.595 |
|               | 0.625              | 0.577  | 0.609 | 0.626 | 0.606 |
|               | 0.742              | 0.671  | 0.685 | 0.663 | 0.665 |
|               | 0.734              | 0.679  | 0.682 | 0.683 | 0.648 |
| AKT S473      | 0.413              | 0.516  | 0.571 | 0.491 | 0.642 |
|               | 0.512              | 0.483  | 0.562 | 0.63  | 0.694 |
|               | 0.651              | 0.602  | 0.637 | 0.571 | 0.739 |
|               | 0.646              | 0.568  | 0.612 | 0.6   | 0.708 |

|              |       |        |       |        |        |
|--------------|-------|--------|-------|--------|--------|
| GSK-3a/b S21 | 0.479 | 0.477  | 0.515 | 0.442  | 0.557  |
|              | 0.499 | 0.499  | 0.524 | 0.587  | 0.597  |
|              | 0.663 | 0.626  | 0.597 | 0.534  | 0.643  |
|              | 0.635 | 0.57   | 0.585 | 0.591  | 0.627  |
| RPS6 S235/S2 | 0.054 | 0.048  | 0.061 | 0.143  | 0.136  |
|              | 0.057 | 0.048  | 0.069 | 0.111  | 0.219  |
|              | 0.107 | 0.075  | 0.121 | 0.176  | 0.175  |
|              | 0.088 | 0.078  | 0.1   | 0.162  | 0.212  |
| RPS6 S240/S2 | 0.058 | 0.066  | 0.086 | 0.189  | 0.175  |
|              | 0.068 | 0.07   | 0.097 | 0.136  | 0.193  |
|              | 0.139 | 0.117  | 0.153 | 0.245  | 0.179  |
|              | 0.126 | 0.114  | 0.127 | 0.174  | 0.192  |
| PKCb S660    | 0.573 | 0.527  | 0.541 | 0.604  | 0.778  |
|              | 0.577 | 0.537  | 0.534 | 0.737  | 0.833  |
|              | 0.588 | 0.547  | 0.519 | 0.613  | 0.78   |
|              | 0.601 | 0.549  | 0.529 | 0.664  | 0.769  |
| PKCd S643    | 0.725 | 0.7173 | 0.685 | 0.668  | 0.688  |
|              | 0.738 | 0.718  | 0.678 | 0.6793 | 0.685  |
|              | 0.72  | 0.71   | 0.675 | 0.671  | 0.677  |
|              | 0.728 | 0.724  | 0.659 | 0.699  | 0.669  |
| MARCKs S512, | 0.675 | 0.6263 | 0.683 | 0.533  | 0.665  |
|              | 0.64  | 0.657  | 0.724 | 0.651  | 0.627  |
|              | 0.656 | 0.606  | 0.615 | 0.5    | 0.669  |
|              | 0.649 | 0.616  | 0.615 | 0.616  | 0.555  |
| CAMI S81     | 0.974 | 0.87   | 0.835 | 0.654  | 0.803  |
|              | 0.956 | 0.815  | 0.755 | 0.731  | 0.842  |
|              | 0.906 | 0.781  | 0.62  | 0.535  | 0.669  |
|              | 0.859 | 0.681  | 0.626 | 0.55   | 0.599  |
| RSK3 T356/S3 | 0.507 | 0.494  | 0.519 | 0.511  | 0.643  |
|              | 0.519 | 0.495  | 0.513 | 0.56   | 0.651  |
|              | 0.615 | 0.575  | 0.577 | 0.586  | 0.725  |
|              | 0.608 | 0.604  | 0.592 | 0.624  | 0.67   |
| RAF S289/S29 | 0.196 | 0.184  | 0.2   | 0.175  | 0.188  |
|              | 0.197 | 0.186  | 0.182 | 0.191  | 0.191  |
|              | 0.226 | 0.205  | 0.2   | 0.195  | 0.21   |
|              | 0.223 | 0.208  | 0.204 | 0.202  | 0.192  |
| MEK S217/S2: | 0.066 | 0.073  | 0.09  | 0.102  | 0.199  |
|              | 0.078 | 0.08   | 0.094 | 0.209  | 0.227  |
|              | 0.108 | 0.104  | 0.091 | 0.127  | 0.2167 |

|              |          |        |       |       |       |
|--------------|----------|--------|-------|-------|-------|
|              | 0.103    | 0.097  | 0.096 | 0.186 | 0.224 |
| ERK T202/Y20 | 0.162    | 0.167  | 0.186 | 0.247 | 0.397 |
|              | 0.174    | 0.159  | 0.179 | 0.407 | 0.472 |
|              | 0.264    | 0.22   | 0.219 | 0.324 | 0.486 |
|              | 0.219    | 0.217  | 0.243 | 0.424 | 0.466 |
| p90RSK S380  | 0.024    | 0.152  | 0.136 | 0.15  | 0.129 |
|              | 0.037    | 0.156  | 0.151 | 0.136 | 0.206 |
|              | 0.315    | 0.163  | 0.166 | 0.161 | 0.209 |
|              | 0.306    | 0.178  | 0.191 | 0.172 | 0.277 |
| STAT1 Y701   | 0.436    | 0.45   | 0.464 | 0.438 | 0.447 |
|              | 0.46     | 0.462  | 0.458 | 0.487 | 0.453 |
|              | 0.44     | 0.427  | 0.411 | 0.402 | 0.42  |
|              | 0.426    | 0.428  | 0.408 | 0.424 | 0.422 |
| STAT3 Y705   | 0.644    | 0.611  | 0.587 | 0.558 | 0.593 |
|              | 0.603    | 0.622  | 0.59  | 0.592 | 0.597 |
|              | 0.612    | 0.633  | 0.576 | 0.569 | 0.607 |
|              | 0.604    | 0.639  | 0.578 | 0.585 | 0.574 |
| CREB S133    | 0.604    | 0.527  | 0.528 | 0.569 | 0.885 |
|              | 0.597    | 0.618  | 0.572 | 0.745 | 0.886 |
|              | 0.593    | 0.584  | 0.554 | 0.592 | 0.865 |
|              | 0.605    | 0.5763 | 0.578 | 0.676 | 0.812 |
| NF-kB S536   | 0.608    | 0.576  | 0.591 | 0.596 | 0.639 |
|              | 0.567    | 0.58   | 0.597 | 0.677 | 0.709 |
|              | 0.656    | 0.64   | 0.636 | 0.679 | 0.715 |
|              | 0.667    | 0.666  | 0.657 | 0.693 | 0.719 |
| c-Jun S63    | 0.039    | 0.036  | 0.034 | 0.031 | 0.044 |
|              | 0.035    | 0.034  | 0.04  | 0.036 | 0.041 |
|              | 0.051    | 0.054  | 0.039 | 0.038 | 0.055 |
|              | 0.047    | 0.046  | 0.041 | 0.037 | 0.04  |
|              | MEK2 sh4 |        |       |       |       |
| PDGFRb Y771  | 0.283    | 0.288  | 0.286 | 0.291 | 0.285 |
|              | 0.287    | 0.292  | 0.288 | 0.282 | 0.281 |
|              | 0.365    | 0.325  | 0.306 | 0.325 | 0.298 |
|              | 0.318    | 0.321  | 0.311 | 0.316 | 0.323 |
| SHC Y317     | 0.417    | 0.453  | 0.494 | 0.521 | 0.484 |
|              | 0.422    | 0.455  | 0.47  | 0.497 | 0.47  |
|              | 0.481    | 0.5    | 0.498 | 0.556 | 0.505 |

|               |        |        |       |       |        |
|---------------|--------|--------|-------|-------|--------|
|               | 0.457  | 0.501  | 0.502 | 0.534 | 0.532  |
| c-Cbl Y774    | 0.415  | 0.419  | 0.407 | 0.388 | 0.399  |
|               | 0.4203 | 0.396  | 0.392 | 0.372 | 0.388  |
|               | 0.426  | 0.414  | 0.402 | 0.391 | 0.386  |
|               | 0.42   | 0.416  | 0.409 | 0.401 | 0.403  |
| Paxillin Y118 | 0.708  | 0.672  | 0.695 | 0.717 | 0.713  |
|               | 0.717  | 0.7    | 0.672 | 0.681 | 0.691  |
|               | 0.71   | 0.687  | 0.661 | 0.693 | 0.683  |
|               | 0.697  | 0.695  | 0.669 | 0.713 | 0.705  |
| AKT S473      | 0.585  | 0.566  | 0.59  | 0.673 | 0.605  |
|               | 0.577  | 0.546  | 0.578 | 0.626 | 0.684  |
|               | 0.611  | 0.523  | 0.505 | 0.543 | 0.573  |
|               | 0.532  | 0.516  | 0.503 | 0.582 | 0.654  |
| GSK-3a/b S21  | 0.563  | 0.534  | 0.639 | 0.658 | 0.61   |
|               | 0.526  | 0.571  | 0.568 | 0.593 | 0.59   |
|               | 0.565  | 0.508  | 0.519 | 0.569 | 0.526  |
|               | 0.493  | 0.562  | 0.538 | 0.582 | 0.605  |
| RPS6 S235/S2  | 0.123  | 0.081  | 0.089 | 0.132 | 0.216  |
|               | 0.093  | 0.0877 | 0.101 | 0.152 | 0.219  |
|               | 0.11   | 0.091  | 0.094 | 0.122 | 0.202  |
|               | 0.092  | 0.091  | 0.096 | 0.131 | 0.193  |
| RPS6 S240/S2  | 0.172  | 0.13   | 0.133 | 0.171 | 0.2    |
|               | 0.15   | 0.119  | 0.145 | 0.189 | 0.197  |
|               | 0.131  | 0.115  | 0.121 | 0.148 | 0.177  |
|               | 0.111  | 0.111  | 0.121 | 0.161 | 0.194  |
| PKCb S660     | 0.538  | 0.576  | 0.599 | 0.729 | 0.9513 |
|               | 0.562  | 0.573  | 0.603 | 0.717 | 0.959  |
|               | 0.683  | 0.625  | 0.609 | 0.77  | 0.891  |
|               | 0.61   | 0.609  | 0.62  | 0.757 | 1.004  |
| PKCd S643     | 0.67   | 0.72   | 0.718 | 0.661 | 0.72   |
|               | 0.685  | 0.734  | 0.708 | 0.636 | 0.723  |
|               | 0.6957 | 0.811  | 0.753 | 0.708 | 0.786  |
|               | 0.732  | 0.788  | 0.761 | 0.694 | 0.78   |
| MARCKs S512,  | 0.588  | 0.566  | 0.596 | 0.557 | 0.545  |
|               | 0.614  | 0.596  | 0.568 | 0.509 | 0.527  |
|               | 0.597  | 0.581  | 0.552 | 0.523 | 0.538  |
|               | 0.605  | 0.58   | 0.539 | 0.523 | 0.57   |
| CAMI S81      | 0.571  | 0.528  | 0.538 | 0.533 | 0.681  |
|               | 0.568  | 0.534  | 0.523 | 0.561 | 0.567  |

|              |       |       |       |       |       |
|--------------|-------|-------|-------|-------|-------|
|              | 0.821 | 0.727 | 0.629 | 0.652 | 0.641 |
|              | 0.671 | 0.652 | 0.625 | 0.617 | 0.647 |
| RSK3 T356/S3 | 0.603 | 0.597 | 0.597 | 0.69  | 0.719 |
|              | 0.611 | 0.602 | 0.571 | 0.647 | 0.712 |
|              | 0.598 | 0.579 | 0.55  | 0.632 | 0.657 |
|              | 0.601 | 0.586 | 0.554 | 0.631 | 0.693 |
| RAF S289/S29 | 0.213 | 0.209 | 0.212 | 0.212 | 0.208 |
|              | 0.217 | 0.212 | 0.205 | 0.2   | 0.201 |
|              | 0.206 | 0.201 | 0.184 | 0.186 | 0.185 |
|              | 0.201 | 0.202 | 0.197 | 0.192 | 0.194 |
| MEK S217/S2  | 0.25  | 0.251 | 0.264 | 0.615 | 1.095 |
|              | 0.278 | 0.238 | 0.253 | 0.55  | 0.93  |
|              | 0.225 | 0.216 | 0.226 | 0.556 | 0.701 |
|              | 0.248 | 0.205 | 0.226 | 0.55  | 0.899 |
| ERK T202/Y20 | 0.226 | 0.198 | 0.219 | 0.363 | 0.441 |
|              | 0.215 | 0.205 | 0.22  | 0.334 | 0.41  |
|              | 0.214 | 0.191 | 0.191 | 0.288 | 0.31  |
|              | 0.188 | 0.189 | 0.19  | 0.304 | 0.39  |
| p90RSK S380  | 0.187 | 0.176 | 0.178 | 0.231 | 0.316 |
|              | 0.22  | 0.178 | 0.214 | 0.262 | 0.248 |
|              | 0.267 | 0.122 | 0.132 | 0.086 | 0.184 |
|              | 0.295 | 0.126 | 0.129 | 0.092 | 0.161 |
| STAT1 Y701   | 0.39  | 0.413 | 0.412 | 0.459 | 0.431 |
|              | 0.401 | 0.415 | 0.408 | 0.44  | 0.434 |
|              | 0.4   | 0.422 | 0.404 | 0.468 | 0.436 |
|              | 0.409 | 0.427 | 0.411 | 0.447 | 0.459 |
| STAT3 Y705   | 0.533 | 0.606 | 0.577 | 0.586 | 0.574 |
|              | 0.523 | 0.614 | 0.571 | 0.595 | 0.598 |
|              | 0.654 | 0.655 | 0.603 | 0.64  | 0.63  |
|              | 0.57  | 0.662 | 0.609 | 0.618 | 0.634 |
| CREB S133    | 0.554 | 0.529 | 0.616 | 0.728 | 0.809 |
|              | 0.614 | 0.556 | 0.601 | 0.648 | 0.742 |
|              | 0.713 | 0.726 | 0.689 | 0.82  | 0.801 |
|              | 0.664 | 0.721 | 0.693 | 0.792 | 0.784 |
| NF-kB S536   | 0.606 | 0.638 | 0.637 | 0.813 | 0.911 |
|              | 0.596 | 0.645 | 0.621 | 0.744 | 0.85  |
|              | 0.617 | 0.631 | 0.611 | 0.738 | 0.79  |
|              | 0.607 | 0.642 | 0.601 | 0.738 | 0.82  |
| c-Jun S63    | 0.042 | 0.042 | 0.04  | 0.043 | 0.053 |

|       |       |       |        |        |
|-------|-------|-------|--------|--------|
| 0.051 | 0.044 | 0.04  | 0.032  | 0.041  |
| 0.041 | 0.045 | 0.037 | 0.0387 | 0.0567 |
| 0.05  | 0.047 | 0.039 | 0.041  | 0.076  |

MEK2 sh5

|               |       |       |       |       |       |
|---------------|-------|-------|-------|-------|-------|
| PDGFRb Y771   | 0.303 | 0.297 | 0.337 | 0.365 | 0.322 |
|               | 0.316 | 0.314 | 0.351 | 0.339 | 0.338 |
|               | 0.309 | 0.31  | 0.325 | 0.318 | 0.343 |
|               | 0.301 | 0.306 | 0.342 | 0.351 | 0.345 |
| SHC Y317      | 0.509 | 0.536 | 0.563 | 0.608 | 0.604 |
|               | 0.522 | 0.566 | 0.595 | 0.613 | 0.607 |
|               | 0.548 | 0.59  | 0.577 | 0.589 | 0.603 |
|               | 0.53  | 0.547 | 0.578 | 0.622 | 0.586 |
| c-Cbl Y774    | 0.388 | 0.39  | 0.418 | 0.463 | 0.386 |
|               | 0.419 | 0.421 | 0.442 | 0.461 | 0.409 |
|               | 0.44  | 0.428 | 0.453 | 0.379 | 0.431 |
|               | 0.466 | 0.433 | 0.453 | 0.423 | 0.449 |
| Paxillin Y118 | 0.642 | 0.613 | 0.614 | 0.641 | 0.677 |
|               | 0.641 | 0.644 | 0.654 | 0.663 | 0.654 |
|               | 0.654 | 0.666 | 0.646 | 0.611 | 0.689 |
|               | 0.661 | 0.666 | 0.68  | 0.595 | 0.694 |
| AKT S473      | 0.473 | 0.507 | 0.507 | 0.625 | 0.61  |
|               | 0.463 | 0.51  | 0.607 | 0.656 | 0.573 |
|               | 0.502 | 0.55  | 0.56  | 0.475 | 0.623 |
|               | 0.458 | 0.537 | 0.615 | 0.493 | 0.698 |
| GSK-3a/b S21  | 0.485 | 0.56  | 0.532 | 0.881 | 0.613 |
|               | 0.486 | 0.491 | 0.535 | 0.653 | 0.588 |
|               | 0.622 | 0.672 | 0.749 | 0.592 | 0.772 |
|               | 0.698 | 0.655 | 0.583 | 0.605 | 0.749 |
| RPS6 S235/S2  | 0.094 | 0.119 | 0.148 | 0.186 | 0.228 |
|               | 0.112 | 0.145 | 0.14  | 0.197 | 0.205 |
|               | 0.119 | 0.161 | 0.16  | 0.126 | 0.234 |
|               | 0.129 | 0.189 | 0.202 | 0.151 | 0.234 |
| RPS6 S240/S2  | 0.079 | 0.109 | 0.13  | 0.181 | 0.132 |
|               | 0.105 | 0.14  | 0.162 | 0.204 | 0.144 |
|               | 0.105 | 0.138 | 0.143 | 0.091 | 0.141 |
|               | 0.119 | 0.186 | 0.215 | 0.168 | 0.174 |
| PKCb S660     | 0.586 | 0.601 | 0.622 | 0.765 | 0.97  |

|              |       |        |       |       |        |
|--------------|-------|--------|-------|-------|--------|
|              | 0.576 | 0.614  | 0.633 | 0.669 | 0.919  |
|              | 0.607 | 0.667  | 0.674 | 0.729 | 0.973  |
|              | 0.561 | 0.588  | 0.615 | 0.721 | 0.908  |
| PKCd S643    | 0.701 | 0.735  | 0.714 | 0.736 | 0.767  |
|              | 0.719 | 0.74   | 0.726 | 0.733 | 0.746  |
|              | 0.792 | 0.7233 | 0.701 | 0.711 | 0.7453 |
|              | 0.698 | 0.695  | 0.701 | 0.744 | 0.723  |
| MARCKs S512, | 0.713 | 0.668  | 0.663 | 0.66  | 0.735  |
|              | 0.65  | 0.684  | 0.689 | 0.684 | 0.679  |
|              | 0.652 | 0.6663 | 0.623 | 0.703 | 0.686  |
|              | 0.646 | 0.647  | 0.695 | 0.663 | 0.699  |
| CAMI S81     | 0.587 | 0.534  | 0.423 | 0.539 | 0.507  |
|              | 0.461 | 0.45   | 0.464 | 0.521 | 0.516  |
|              | 0.542 | 0.525  | 0.47  | 0.475 | 0.574  |
|              | 0.511 | 0.461  | 0.488 | 0.486 | 0.55   |
| RSK3 T356/S3 | 0.549 | 0.598  | 0.584 | 0.723 | 0.821  |
|              | 0.555 | 0.587  | 0.654 | 0.726 | 0.843  |
|              | 0.622 | 0.594  | 0.624 | 0.688 | 0.825  |
|              | 0.595 | 0.609  | 0.658 | 0.718 | 0.855  |
| RAF S289/S29 | 0.178 | 0.185  | 0.181 | 0.198 | 0.187  |
|              | 0.187 | 0.192  | 0.191 | 0.205 | 0.193  |
|              | 0.191 | 0.196  | 0.188 | 0.172 | 0.199  |
|              | 0.2   | 0.181  | 0.2   | 0.184 | 0.211  |
| MEK S217/S2  | 0.093 | 0.087  | 0.148 | 0.242 | 0.27   |
|              | 0.095 | 0.093  | 0.128 | 0.219 | 0.215  |
|              | 0.085 | 0.102  | 0.168 | 0.13  | 0.254  |
|              | 0.087 | 0.095  | 0.172 | 0.191 | 0.276  |
| ERK T202/Y20 | 0.173 | 0.19   | 0.317 | 0.314 | 0.44   |
|              | 0.18  | 0.208  | 0.307 | 0.464 | 0.471  |
|              | 0.179 | 0.176  | 0.312 | 0.254 | 0.481  |
|              | 0.232 | 0.176  | 0.33  | 0.46  | 0.518  |
| p90RSK S380  | 0.094 | 0.123  | 0.157 | 0.168 | 0.354  |
|              | 0.109 | 0.134  | 0.169 | 0.153 | 0.356  |
|              | 0.188 | 0.146  | 0.15  | 0.196 | 0.067  |
|              | 0.224 | 0.144  | 0.133 | 0.267 | 0.087  |
| STAT1 Y701   | 0.4   | 0.442  | 0.457 | 0.451 | 0.484  |
|              | 0.439 | 0.456  | 0.442 | 0.452 | 0.494  |
|              | 0.414 | 0.445  | 0.444 | 0.431 | 0.477  |
|              | 0.396 | 0.417  | 0.456 | 0.476 | 0.46   |

|               |          |       |       |       |       |
|---------------|----------|-------|-------|-------|-------|
| STAT3 Y705    | 0.599    | 0.606 | 0.637 | 0.67  | 0.627 |
|               | 0.644    | 0.644 | 0.657 | 0.669 | 0.65  |
|               | 0.618    | 0.644 | 0.635 | 0.616 | 0.63  |
|               | 0.616    | 0.603 | 0.645 | 0.671 | 0.632 |
| CREB S133     | 0.7      | 0.616 | 0.792 | 0.905 | 1.017 |
|               | 0.716    | 0.705 | 0.812 | 0.864 | 1.002 |
|               | 0.77     | 0.673 | 0.782 | 0.884 | 0.994 |
|               | 0.72     | 0.616 | 0.785 | 0.908 | 0.939 |
| NF-kB S536    | 0.712    | 0.731 | 0.804 | 0.951 | 0.868 |
|               | 0.719    | 0.751 | 0.796 | 0.921 | 0.846 |
|               | 0.77     | 0.792 | 0.862 | 0.851 | 0.914 |
|               | 0.786    | 0.791 | 0.845 | 0.862 | 0.937 |
| c-Jun S63     | 0.043    | 0.057 | 0.049 | 0.071 | 0.073 |
|               | 0.046    | 0.07  | 0.065 | 0.08  | 0.071 |
|               | 0.049    | 0.061 | 0.064 | 0.054 | 0.08  |
|               | 0.052    | 0.069 | 0.065 | 0.064 | 0.093 |
| PDGFRb Y771   | MEK pool |       |       |       |       |
|               | 0.298    | 0.295 | 0.284 | 0.256 | 0.278 |
|               | 0.299    | 0.305 | 0.283 | 0.261 | 0.274 |
|               | 0.304    | 0.308 | 0.297 | 0.263 | 0.278 |
| SHC Y317      | 0.308    | 0.312 | 0.285 | 0.277 | 0.282 |
|               | 0.442    | 0.489 | 0.507 | 0.515 | 0.557 |
|               | 0.46     | 0.539 | 0.53  | 0.54  | 0.57  |
|               | 0.471    | 0.545 | 0.547 | 0.521 | 0.586 |
| c-Cbl Y774    | 0.463    | 0.547 | 0.54  | 0.567 | 0.555 |
|               | 0.287    | 0.323 | 0.332 | 0.345 | 0.351 |
|               | 0.313    | 0.339 | 0.335 | 0.363 | 0.37  |
|               | 0.419    | 0.41  | 0.395 | 0.387 | 0.413 |
| Paxillin Y118 | 0.42     | 0.407 | 0.385 | 0.403 | 0.37  |
|               | 0.583    | 0.569 | 0.595 | 0.62  | 0.564 |
|               | 0.612    | 0.596 | 0.578 | 0.583 | 0.58  |
|               | 0.677    | 0.652 | 0.67  | 0.654 | 0.634 |
| AKT S473      | 0.695    | 0.666 | 0.659 | 0.668 | 0.6   |
|               | 0.469    | 0.572 | 0.65  | 0.643 | 0.584 |
|               | 0.568    | 0.549 | 0.638 | 0.683 | 0.587 |
|               | 0.531    | 0.606 | 0.658 | 0.668 | 0.596 |
|               | 0.645    | 0.58  | 0.637 | 0.581 | 0.704 |

|              |       |       |       |       |       |
|--------------|-------|-------|-------|-------|-------|
| GSK-3a/b S21 | 0.501 | 0.522 | 0.558 | 0.517 | 0.605 |
|              | 0.557 | 0.562 | 0.524 | 0.529 | 0.584 |
|              | 0.628 | 0.582 | 0.568 | 0.562 | 0.672 |
|              | 0.577 | 0.56  | 0.566 | 0.613 | 0.604 |
| RPS6 S235/S2 | 0.108 | 0.089 | 0.168 | 0.186 | 0.25  |
|              | 0.129 | 0.081 | 0.128 | 0.19  | 0.238 |
|              | 0.18  | 0.112 | 0.172 | 0.2   | 0.246 |
|              | 0.142 | 0.117 | 0.166 | 0.188 | 0.259 |
| RPS6 S240/S2 | 0.122 | 0.131 | 0.158 | 0.211 | 0.249 |
|              | 0.136 | 0.107 | 0.138 | 0.241 | 0.247 |
|              | 0.21  | 0.172 | 0.219 | 0.312 | 0.307 |
|              | 0.171 | 0.177 | 0.214 | 0.292 | 0.287 |
| PKCb S660    | 0.593 | 0.521 | 0.499 | 0.64  | 0.814 |
|              | 0.588 | 0.547 | 0.51  | 0.678 | 0.883 |
|              | 0.575 | 0.528 | 0.524 | 0.714 | 0.899 |
|              | 0.568 | 0.557 | 0.535 | 0.755 | 0.912 |
| PKCd S643    | 0.748 | 0.71  | 0.663 | 0.668 | 0.651 |
|              | 0.744 | 0.696 | 0.656 | 0.684 | 0.662 |
|              | 0.713 | 0.689 | 0.664 | 0.663 | 0.675 |
|              | 0.738 | 0.706 | 0.652 | 0.68  | 0.66  |
| MARCKs S512, | 0.705 | 0.646 | 0.649 | 0.546 | 0.622 |
|              | 0.69  | 0.663 | 0.647 | 0.572 | 0.658 |
|              | 0.647 | 0.653 | 0.658 | 0.51  | 0.718 |
|              | 0.656 | 0.664 | 0.624 | 0.598 | 0.635 |
| CAMI S81     | 0.948 | 1.07  | 0.876 | 0.788 | 0.748 |
|              | 1.028 | 0.941 | 0.806 | 0.793 | 0.743 |
|              | 0.65  | 0.75  | 0.717 | 0.675 | 0.669 |
|              | 0.784 | 0.723 | 0.672 | 0.634 | 0.566 |
| RSK3 T356/S3 | 0.504 | 0.466 | 0.498 | 0.58  | 0.576 |
|              | 0.493 | 0.456 | 0.485 | 0.576 | 0.595 |
|              | 0.562 | 0.497 | 0.549 | 0.618 | 0.681 |
|              | 0.554 | 0.522 | 0.529 | 0.635 | 0.614 |
| RAF S289/S29 | 0.184 | 0.186 | 0.178 | 0.173 | 0.184 |
|              | 0.194 | 0.191 | 0.177 | 0.172 | 0.182 |
|              | 0.203 | 0.192 | 0.194 | 0.181 | 0.21  |
|              | 0.207 | 0.199 | 0.19  | 0.192 | 0.196 |
| MEK S217/S2  | 0.14  | 0.167 | 0.184 | 0.387 | 0.427 |
|              | 0.151 | 0.171 | 0.193 | 0.405 | 0.548 |
|              | 0.189 | 0.219 | 0.231 | 0.392 | 0.646 |
|              | 0.195 | 0.226 | 0.224 | 0.462 | 0.552 |

|              |           |       |       |       |       |
|--------------|-----------|-------|-------|-------|-------|
| ERK T202/Y20 | 0.161     | 0.169 | 0.197 | 0.32  | 0.405 |
|              | 0.168     | 0.175 | 0.187 | 0.319 | 0.404 |
|              | 0.254     | 0.192 | 0.216 | 0.296 | 0.41  |
|              | 0.224     | 0.223 | 0.202 | 0.377 | 0.408 |
| p90RSK S380  | 0.018     | 0.11  | 0.115 | 0.109 | 0.131 |
|              | 0.018     | 0.102 | 0.111 | 0.112 | 0.166 |
|              | 0.255     | 0.153 | 0.15  | 0.145 | 0.149 |
|              | 0.252     | 0.145 | 0.156 | 0.143 | 0.2   |
| STAT1 Y701   | 0.394     | 0.417 | 0.44  | 0.425 | 0.439 |
|              | 0.408     | 0.435 | 0.443 | 0.414 | 0.432 |
|              | 0.42      | 0.427 | 0.449 | 0.425 | 0.448 |
|              | 0.428     | 0.443 | 0.443 | 0.439 | 0.445 |
| STAT3 Y705   | 0.599     | 0.577 | 0.599 | 0.587 | 0.529 |
|              | 0.624     | 0.602 | 0.6   | 0.597 | 0.549 |
|              | 0.618     | 0.591 | 0.586 | 0.588 | 0.548 |
|              | 0.622     | 0.594 | 0.589 | 0.61  | 0.562 |
| CREB S133    | 0.525     | 0.497 | 0.541 | 0.587 | 0.716 |
|              | 0.563     | 0.544 | 0.569 | 0.639 | 0.768 |
|              | 0.536     | 0.58  | 0.617 | 0.617 | 0.847 |
|              | 0.613     | 0.657 | 0.611 | 0.696 | 0.783 |
| NF-kB S536   | 0.616     | 0.626 | 0.636 | 0.718 | 0.81  |
|              | 0.605     | 0.645 | 0.645 | 0.75  | 0.829 |
|              | 0.638     | 0.631 | 0.649 | 0.734 | 0.833 |
|              | 0.636     | 0.646 | 0.658 | 0.777 | 0.802 |
| c-Jun S63    | 0.056     | 0.058 | 0.047 | 0.041 | 0.05  |
|              | 0.052     | 0.051 | 0.042 | 0.039 | 0.053 |
|              | 0.063     | 0.059 | 0.049 | 0.037 | 0.079 |
|              | 0.064     | 0.065 | 0.046 | 0.049 | 0.055 |
| PDGFRb Y771  | MAPK1 sh2 |       |       |       |       |
|              | 0.268     | 0.277 | 0.292 | 0.274 | 0.284 |
|              | 0.267     | 0.277 | 0.293 | 0.277 | 0.283 |
|              | 0.283     | 0.281 | 0.284 | 0.264 | 0.276 |
|              | 0.27      | 0.274 | 0.291 | 0.276 | 0.285 |
| SHC Y317     | 0.388     | 0.428 | 0.494 | 0.501 | 0.478 |
|              | 0.397     | 0.473 | 0.499 | 0.506 | 0.467 |
|              | 0.398     | 0.475 | 0.504 | 0.499 | 0.491 |
|              | 0.412     | 0.499 | 0.499 | 0.518 | 0.488 |

|               |        |        |       |       |       |
|---------------|--------|--------|-------|-------|-------|
| c-Cbl Y774    | 0.403  | 0.419  | 0.38  | 0.379 | 0.4   |
|               | 0.4113 | 0.419  | 0.401 | 0.385 | 0.405 |
|               | 0.409  | 0.418  | 0.384 | 0.387 | 0.43  |
|               | 0.422  | 0.42   | 0.392 | 0.376 | 0.408 |
| Paxillin Y118 | 0.736  | 0.646  | 0.615 | 0.631 | 0.62  |
|               | 0.728  | 0.679  | 0.65  | 0.662 | 0.627 |
|               | 0.699  | 0.693  | 0.61  | 0.639 | 0.656 |
|               | 0.764  | 0.693  | 0.685 | 0.65  | 0.635 |
| AKT S473      | 0.591  | 0.549  | 0.621 | 0.548 | 0.533 |
|               | 0.55   | 0.568  | 0.524 | 0.573 | 0.546 |
|               | 0.604  | 0.574  | 0.578 | 0.616 | 0.581 |
|               | 0.576  | 0.583  | 0.602 | 0.607 | 0.537 |
| GSK-3a/b S21  | 0.619  | 0.596  | 0.664 | 0.53  | 0.543 |
|               | 0.621  | 0.624  | 0.557 | 0.539 | 0.54  |
|               | 0.519  | 0.635  | 0.62  | 0.618 | 0.62  |
|               | 0.514  | 0.633  | 0.641 | 0.482 | 0.56  |
| RPS6 S235/S2  | 0.241  | 0.183  | 0.243 | 0.257 | 0.373 |
|               | 0.206  | 0.2    | 0.193 | 0.247 | 0.378 |
|               | 0.28   | 0.206  | 0.239 | 0.234 | 0.398 |
|               | 0.196  | 0.231  | 0.201 | 0.231 | 0.389 |
| RPS6 S240/S2  | 0.171  | 0.129  | 0.178 | 0.227 | 0.266 |
|               | 0.147  | 0.14   | 0.167 | 0.216 | 0.269 |
|               | 0.196  | 0.149  | 0.168 | 0.233 | 0.292 |
|               | 0.188  | 0.177  | 0.19  | 0.227 | 0.298 |
| PKCb S660     | 0.494  | 0.509  | 0.509 | 0.736 | 0.771 |
|               | 0.475  | 0.506  | 0.511 | 0.759 | 0.785 |
|               | 0.51   | 0.532  | 0.515 | 0.732 | 0.839 |
|               | 0.507  | 0.5157 | 0.521 | 0.737 | 0.821 |
| PKCd S643     | 0.582  | 0.577  | 0.577 | 0.575 | 0.598 |
|               | 0.592  | 0.617  | 0.586 | 0.573 | 0.59  |
|               | 0.608  | 0.619  | 0.583 | 0.589 | 0.615 |
|               | 0.599  | 0.624  | 0.589 | 0.593 | 0.607 |
| MARCKs S512,  | 0.672  | 0.639  | 0.696 | 0.66  | 0.652 |
|               | 0.702  | 0.743  | 0.726 | 0.693 | 0.652 |
|               | 0.69   | 0.727  | 0.612 | 0.578 | 0.602 |
|               | 0.684  | 0.722  | 0.695 | 0.667 | 0.611 |
| CAMI S81      | 0.484  | 0.471  | 0.482 | 0.481 | 0.47  |
|               | 0.474  | 0.508  | 0.503 | 0.495 | 0.486 |
|               | 0.507  | 0.539  | 0.473 | 0.48  | 0.496 |

|                |       |        |        |       |        |
|----------------|-------|--------|--------|-------|--------|
|                | 0.505 | 0.538  | 0.522  | 0.488 | 0.494  |
| RSK3 T356/S357 | 0.587 | 0.613  | 0.587  | 0.657 | 0.68   |
|                | 0.572 | 0.634  | 0.59   | 0.662 | 0.692  |
|                | 0.593 | 0.642  | 0.582  | 0.643 | 0.742  |
|                | 0.597 | 0.651  | 0.601  | 0.666 | 0.712  |
| RAF S289/S293  | 0.178 | 0.169  | 0.178  | 0.195 | 0.196  |
|                | 0.192 | 0.196  | 0.199  | 0.198 | 0.194  |
|                | 0.192 | 0.178  | 0.177  | 0.18  | 0.195  |
|                | 0.192 | 0.179  | 0.195  | 0.183 | 0.183  |
| MEK S217/S220  | 0.082 | 0.077  | 0.145  | 0.349 | 0.418  |
|                | 0.097 | 0.094  | 0.149  | 0.377 | 0.45   |
|                | 0.082 | 0.089  | 0.086  | 0.259 | 0.457  |
|                | 0.102 | 0.097  | 0.126  | 0.301 | 0.427  |
| ERK T202/Y204  | 0.225 | 0.176  | 0.255  | 0.483 | 0.546  |
|                | 0.175 | 0.19   | 0.273  | 0.55  | 0.59   |
|                | 0.233 | 0.196  | 0.197  | 0.398 | 0.681  |
|                | 0.188 | 0.2    | 0.242  | 0.441 | 0.565  |
| p90RSK S380    | 0.282 | 0.11   | 0.09   | 0.102 | 0.185  |
|                | 0.279 | 0.098  | 0.108  | 0.121 | 0.214  |
|                | 0.213 | 0.115  | 0.128  | 0.11  | 0.169  |
|                | 0.231 | 0.122  | 0.11   | 0.113 | 0.206  |
| STAT1 Y701     | 0.343 | 0.369  | 0.3767 | 0.393 | 0.37   |
|                | 0.351 | 0.3827 | 0.373  | 0.392 | 0.394  |
|                | 0.364 | 0.396  | 0.373  | 0.376 | 0.377  |
|                | 0.353 | 0.383  | 0.384  | 0.388 | 0.395  |
| STAT3 Y705     | 0.564 | 0.513  | 0.543  | 0.524 | 0.542  |
|                | 0.55  | 0.522  | 0.536  | 0.53  | 0.539  |
|                | 0.58  | 0.543  | 0.552  | 0.549 | 0.562  |
|                | 0.567 | 0.542  | 0.559  | 0.55  | 0.567  |
| CREB S133      | 0.505 | 0.525  | 0.493  | 0.566 | 0.635  |
|                | 0.498 | 0.536  | 0.57   | 0.613 | 0.66   |
|                | 0.493 | 0.51   | 0.5    | 0.566 | 0.717  |
|                | 0.518 | 0.529  | 0.568  | 0.622 | 0.717  |
| NF-kB S536     | 0.642 | 0.586  | 0.644  | 0.714 | 0.703  |
|                | 0.624 | 0.606  | 0.674  | 0.738 | 0.711  |
|                | 0.634 | 0.603  | 0.597  | 0.656 | 0.7113 |
|                | 0.645 | 0.621  | 0.666  | 0.686 | 0.72   |
| c-Jun S63      | 0.084 | 0.074  | 0.064  | 0.079 | 0.067  |
|                | 0.087 | 0.08   | 0.096  | 0.064 | 0.077  |

|               |           |       |       |       |       |
|---------------|-----------|-------|-------|-------|-------|
|               | 0.074     | 0.076 | 0.047 | 0.045 | 0.095 |
|               | 0.074     | 0.085 | 0.066 | 0.057 | 0.09  |
|               | MAPK1 sh5 |       |       |       |       |
| PDGFRb Y771   | 0.301     | 0.306 | 0.3   | 0.309 | 0.295 |
|               | 0.304     | 0.323 | 0.311 | 0.318 | 0.322 |
|               | 0.28      | 0.275 | 0.258 | 0.27  | 0.284 |
|               | 0.283     | 0.292 | 0.272 | 0.266 | 0.279 |
| SHC Y317      | 0.44      | 0.476 | 0.516 | 0.543 | 0.54  |
|               | 0.445     | 0.496 | 0.515 | 0.543 | 0.541 |
|               | 0.413     | 0.457 | 0.474 | 0.5   | 0.504 |
|               | 0.411     | 0.474 | 0.492 | 0.517 | 0.506 |
| c-Cbl Y774    | 0.387     | 0.377 | 0.381 | 0.392 | 0.393 |
|               | 0.382     | 0.389 | 0.378 | 0.384 | 0.388 |
|               | 0.406     | 0.423 | 0.389 | 0.404 | 0.407 |
|               | 0.408     | 0.416 | 0.396 | 0.407 | 0.422 |
| Paxillin Y118 | 0.658     | 0.632 | 0.665 | 0.614 | 0.669 |
|               | 0.6963    | 0.635 | 0.662 | 0.629 | 0.707 |
|               | 0.705     | 0.683 | 0.69  | 0.656 | 0.732 |
|               | 0.726     | 0.689 | 0.711 | 0.636 | 0.739 |
| AKT S473      | 0.544     | 0.5   | 0.541 | 0.485 | 0.534 |
|               | 0.518     | 0.512 | 0.543 | 0.505 | 0.503 |
|               | 0.565     | 0.54  | 0.548 | 0.587 | 0.538 |
|               | 0.551     | 0.541 | 0.56  | 0.603 | 0.527 |
| GSK-3a/b S21  | 0.553     | 0.511 | 0.582 | 0.592 | 0.627 |
|               | 0.563     | 0.522 | 0.558 | 0.479 | 0.523 |
|               | 0.5       | 0.572 | 0.563 | 0.468 | 0.568 |
|               | 0.502     | 0.477 | 0.634 | 0.474 | 0.55  |
| RPS6 S235/S2  | 0.095     | 0.06  | 0.068 | 0.116 | 0.207 |
|               | 0.076     | 0.057 | 0.068 | 0.133 | 0.223 |
|               | 0.116     | 0.08  | 0.091 | 0.134 | 0.231 |
|               | 0.097     | 0.076 | 0.094 | 0.147 | 0.272 |
| RPS6 S240/S2  | 0.087     | 0.055 | 0.06  | 0.092 | 0.164 |
|               | 0.072     | 0.05  | 0.062 | 0.116 | 0.168 |
|               | 0.106     | 0.079 | 0.087 | 0.126 | 0.155 |
|               | 0.096     | 0.073 | 0.089 | 0.135 | 0.139 |
| PKCb S660     | 0.547     | 0.549 | 0.559 | 0.778 | 0.969 |
|               | 0.564     | 0.57  | 0.555 | 0.822 | 0.95  |

|              |       |       |       |       |       |
|--------------|-------|-------|-------|-------|-------|
|              | 0.547 | 0.529 | 0.5   | 0.7   | 0.897 |
|              | 0.539 | 0.535 | 0.511 | 0.703 | 0.869 |
| PKCd S643    | 0.654 | 0.631 | 0.661 | 0.651 | 0.678 |
|              | 0.654 | 0.653 | 0.679 | 0.659 | 0.681 |
|              | 0.618 | 0.599 | 0.598 | 0.592 | 0.641 |
|              | 0.629 | 0.616 | 0.633 | 0.602 | 0.637 |
| MARCKs S512, | 0.689 | 0.653 | 0.675 | 0.641 | 0.672 |
|              | 0.693 | 0.712 | 0.691 | 0.66  | 0.677 |
|              | 0.697 | 0.703 | 0.625 | 0.614 | 0.672 |
|              | 0.706 | 0.741 | 0.648 | 0.618 | 0.674 |
| CAMI S81     | 0.591 | 0.551 | 0.554 | 0.589 | 0.601 |
|              | 0.551 | 0.587 | 0.58  | 0.591 | 0.596 |
|              | 0.522 | 0.507 | 0.479 | 0.519 | 0.55  |
|              | 0.508 | 0.537 | 0.51  | 0.523 | 0.521 |
| RSK3 T356/S3 | 0.554 | 0.554 | 0.548 | 0.68  | 0.673 |
|              | 0.545 | 0.563 | 0.559 | 0.685 | 0.684 |
|              | 0.599 | 0.609 | 0.54  | 0.675 | 0.677 |
|              | 0.593 | 0.602 | 0.551 | 0.662 | 0.682 |
| RAF S289/S29 | 0.184 | 0.173 | 0.183 | 0.197 | 0.204 |
|              | 0.186 | 0.193 | 0.197 | 0.195 | 0.204 |
|              | 0.206 | 0.185 | 0.18  | 0.185 | 0.2   |
|              | 0.208 | 0.196 | 0.202 | 0.2   | 0.214 |
| MEK S217/S22 | 0.076 | 0.082 | 0.123 | 0.293 | 0.418 |
|              | 0.089 | 0.082 | 0.132 | 0.344 | 0.419 |
|              | 0.086 | 0.098 | 0.116 | 0.285 | 0.436 |
|              | 0.106 | 0.101 | 0.129 | 0.286 | 0.426 |
| ERK T202/Y20 | 0.223 | 0.178 | 0.218 | 0.385 | 0.53  |
|              | 0.174 | 0.178 | 0.242 | 0.494 | 0.524 |
|              | 0.246 | 0.195 | 0.217 | 0.431 | 0.622 |
|              | 0.193 | 0.205 | 0.238 | 0.45  | 0.583 |
| p90RSK S380  | 0.265 | 0.131 | 0.089 | 0.099 | 0.192 |
|              | 0.324 | 0.115 | 0.116 | 0.124 | 0.241 |
|              | 0.248 | 0.109 | 0.124 | 0.093 | 0.188 |
|              | 0.233 | 0.103 | 0.106 | 0.119 | 0.186 |
| STAT1 Y701   | 0.372 | 0.385 | 0.396 | 0.425 | 0.429 |
|              | 0.375 | 0.387 | 0.393 | 0.421 | 0.437 |
|              | 0.391 | 0.382 | 0.357 | 0.404 | 0.42  |
|              | 0.378 | 0.397 | 0.39  | 0.41  | 0.424 |
| STAT3 Y705   | 0.522 | 0.589 | 0.611 | 0.618 | 0.59  |

|               |           |       |        |        |       |
|---------------|-----------|-------|--------|--------|-------|
|               | 0.541     | 0.588 | 0.596  | 0.615  | 0.603 |
|               | 0.528     | 0.565 | 0.573  | 0.582  | 0.566 |
|               | 0.52      | 0.556 | 0.566  | 0.573  | 0.571 |
| CREB S133     | 0.552     | 0.543 | 0.622  | 0.749  | 0.861 |
|               | 0.579     | 0.616 | 0.663  | 0.79   | 0.86  |
|               | 0.532     | 0.533 | 0.537  | 0.655  | 0.743 |
|               | 0.528     | 0.593 | 0.553  | 0.661  | 0.797 |
| NF-kB S536    | 0.58      | 0.583 | 0.619  | 0.67   | 0.714 |
|               | 0.567     | 0.592 | 0.605  | 0.696  | 0.689 |
|               | 0.584     | 0.608 | 0.629  | 0.698  | 0.736 |
|               | 0.597     | 0.619 | 0.617  | 0.674  | 0.739 |
| c-Jun S63     | 0.036     | 0.036 | 0.045  | 0.042  | 0.046 |
|               | 0.039     | 0.043 | 0.039  | 0.044  | 0.055 |
|               | 0.049     | 0.082 | 0.0503 | 0.0507 | 0.091 |
|               | 0.057     | 0.063 | 0.067  | 0.066  | 0.076 |
|               | MAPK3 sh1 |       |        |        |       |
| PDGFRb Y771   | 0.299     | 0.304 | 0.288  | 0.2895 | 0.291 |
|               | 0.305     | 0.311 | 0.296  | 0.286  | 0.297 |
|               | 0.298     | 0.304 | 0.286  | 0.2895 | 0.285 |
|               | 0.294     | 0.3   | 0.295  | 0.293  | 0.287 |
| SHC Y317      | 0.41      | 0.454 | 0.465  | 0.482  | 0.489 |
|               | 0.444     | 0.476 | 0.474  | 0.479  | 0.507 |
|               | 0.432     | 0.461 | 0.446  | 0.448  | 0.487 |
|               | 0.434     | 0.454 | 0.472  | 0.479  | 0.514 |
| c-Cbl Y774    | 0.4003    | 0.403 | 0.397  | 0.41   | 0.401 |
|               | 0.403     | 0.424 | 0.415  | 0.408  | 0.411 |
|               | 0.398     | 0.419 | 0.387  | 0.389  | 0.379 |
|               | 0.4       | 0.401 | 0.385  | 0.4    | 0.38  |
| Paxillin Y118 | 0.667     | 0.697 | 0.63   | 0.686  | 0.676 |
|               | 0.727     | 0.719 | 0.684  | 0.691  | 0.703 |
|               | 0.695     | 0.704 | 0.62   | 0.659  | 0.653 |
|               | 0.706     | 0.678 | 0.643  | 0.685  | 0.705 |
| AKT S473      | 0.552     | 0.552 | 0.591  | 0.615  | 0.652 |
|               | 0.588     | 0.59  | 0.655  | 0.627  | 0.663 |
|               | 0.567     | 0.545 | 0.564  | 0.574  | 0.658 |
|               | 0.572     | 0.586 | 0.617  | 0.641  | 0.633 |
| GSK-3a/b S21  | 0.585     | 0.598 | 0.464  | 0.548  | 0.557 |

|              |        |       |       |       |       |
|--------------|--------|-------|-------|-------|-------|
|              | 0.497  | 0.498 | 0.523 | 0.545 | 0.572 |
|              | 0.584  | 0.578 | 0.542 | 0.589 | 0.53  |
|              | 0.482  | 0.576 | 0.482 | 0.516 | 0.615 |
| RPS6 S235/S2 | 0.118  | 0.076 | 0.098 | 0.137 | 0.227 |
|              | 0.108  | 0.081 | 0.101 | 0.13  | 0.228 |
|              | 0.13   | 0.08  | 0.101 | 0.13  | 0.232 |
|              | 0.11   | 0.091 | 0.114 | 0.148 | 0.209 |
| RPS6 S240/S2 | 0.093  | 0.064 | 0.085 | 0.126 | 0.155 |
|              | 0.084  | 0.069 | 0.088 | 0.123 | 0.141 |
|              | 0.097  | 0.066 | 0.089 | 0.136 | 0.135 |
|              | 0.096  | 0.083 | 0.101 | 0.134 | 0.126 |
| PKCb S660    | 0.5733 | 0.564 | 0.541 | 0.712 | 0.916 |
|              | 0.577  | 0.574 | 0.571 | 0.699 | 0.857 |
|              | 0.567  | 0.573 | 0.551 | 0.67  | 0.901 |
|              | 0.576  | 0.557 | 0.562 | 0.713 | 0.888 |
| PKCd S643    | 0.621  | 0.633 | 0.623 | 0.622 | 0.656 |
|              | 0.643  | 0.64  | 0.632 | 0.627 | 0.654 |
|              | 0.641  | 0.637 | 0.619 | 0.609 | 0.641 |
|              | 0.634  | 0.632 | 0.624 | 0.623 | 0.638 |
| MARCKs S512, | 0.505  | 0.57  | 0.538 | 0.509 | 0.569 |
|              | 0.611  | 0.673 | 0.649 | 0.561 | 0.627 |
|              | 0.593  | 0.649 | 0.579 | 0.486 | 0.603 |
|              | 0.605  | 0.572 | 0.629 | 0.571 | 0.606 |
| CAMI S81     | 0.5227 | 0.522 | 0.502 | 0.511 | 0.559 |
|              | 0.534  | 0.548 | 0.565 | 0.534 | 0.592 |
|              | 0.509  | 0.539 | 0.512 | 0.525 | 0.561 |
|              | 0.525  | 0.541 | 0.551 | 0.564 | 0.591 |
| RSK3 T356/S3 | 0.614  | 0.602 | 0.597 | 0.676 | 0.819 |
|              | 0.632  | 0.625 | 0.641 | 0.715 | 0.857 |
|              | 0.636  | 0.609 | 0.596 | 0.682 | 0.813 |
|              | 0.622  | 0.604 | 0.617 | 0.732 | 0.824 |
| RAF S289/S29 | 0.173  | 0.193 | 0.189 | 0.182 | 0.194 |
|              | 0.187  | 0.2   | 0.2   | 0.185 | 0.199 |
|              | 0.179  | 0.19  | 0.18  | 0.183 | 0.182 |
|              | 0.179  | 0.188 | 0.19  | 0.182 | 0.182 |
| MEK S217/S2  | 0.162  | 0.185 | 0.244 | 0.546 | 0.846 |
|              | 0.199  | 0.2   | 0.273 | 0.566 | 0.886 |
|              | 0.175  | 0.197 | 0.234 | 0.484 | 0.812 |
|              | 0.189  | 0.185 | 0.251 | 0.55  | 0.78  |

|              |           |        |       |       |       |
|--------------|-----------|--------|-------|-------|-------|
| ERK T202/Y20 | 0.191     | 0.173  | 0.189 | 0.255 | 0.331 |
|              | 0.181     | 0.186  | 0.214 | 0.28  | 0.347 |
|              | 0.185     | 0.17   | 0.163 | 0.216 | 0.298 |
|              | 0.161     | 0.164  | 0.186 | 0.274 | 0.305 |
| p90RSK S380  | 0.311     | 0.103  | 0.114 | 0.106 | 0.156 |
|              | 0.232     | 0.109  | 0.097 | 0.135 | 0.146 |
|              | 0.258     | 0.114  | 0.132 | 0.125 | 0.168 |
|              | 0.256     | 0.136  | 0.118 | 0.132 | 0.203 |
| STAT1 Y701   | 0.332     | 0.388  | 0.4   | 0.419 | 0.437 |
|              | 0.356     | 0.385  | 0.406 | 0.421 | 0.448 |
|              | 0.361     | 0.386  | 0.39  | 0.406 | 0.432 |
|              | 0.356     | 0.386  | 0.401 | 0.412 | 0.423 |
| STAT3 Y705   | 0.535     | 0.573  | 0.567 | 0.602 | 0.575 |
|              | 0.542     | 0.566  | 0.579 | 0.586 | 0.57  |
|              | 0.563     | 0.591  | 0.583 | 0.605 | 0.58  |
|              | 0.562     | 0.576  | 0.584 | 0.616 | 0.573 |
| CREB S133    | 0.515     | 0.483  | 0.577 | 0.615 | 0.808 |
|              | 0.571     | 0.631  | 0.646 | 0.642 | 0.815 |
|              | 0.585     | 0.59   | 0.584 | 0.611 | 0.767 |
|              | 0.568     | 0.465  | 0.6   | 0.649 | 0.781 |
| NF-kB S536   | 0.599     | 0.63   | 0.657 | 0.728 | 0.793 |
|              | 0.631     | 0.647  | 0.656 | 0.694 | 0.728 |
|              | 0.606     | 0.638  | 0.631 | 0.687 | 0.754 |
|              | 0.601     | 0.613  | 0.622 | 0.676 | 0.729 |
| c-Jun S63    | 0.0573    | 0.053  | 0.045 | 0.045 | 0.055 |
|              | 0.058     | 0.0553 | 0.068 | 0.038 | 0.073 |
|              | 0.057     | 0.057  | 0.057 | 0.043 | 0.063 |
|              | 0.057     | 0.056  | 0.059 | 0.054 | 0.058 |
| PDGFRb Y771  | MAPK3 sh4 |        |       |       |       |
|              | 0.278     | 0.27   | 0.28  | 0.281 | 0.289 |
|              | 0.282     | 0.281  | 0.287 | 0.273 | 0.297 |
|              | 0.282     | 0.272  | 0.282 | 0.269 | 0.289 |
|              | 0.2807    | 0.269  | 0.292 | 0.296 | 0.29  |
| SHC Y317     | 0.4       | 0.455  | 0.428 | 0.553 | 0.538 |
|              | 0.448     | 0.472  | 0.466 | 0.546 | 0.54  |
|              | 0.4       | 0.471  | 0.456 | 0.518 | 0.529 |
|              | 0.426     | 0.471  | 0.475 | 0.55  | 0.54  |

|               |       |       |        |        |       |
|---------------|-------|-------|--------|--------|-------|
| c-Cbl Y774    | 0.393 | 0.386 | 0.397  | 0.394  | 0.355 |
|               | 0.398 | 0.393 | 0.3983 | 0.385  | 0.369 |
|               | 0.395 | 0.385 | 0.389  | 0.359  | 0.35  |
|               | 0.395 | 0.387 | 0.409  | 0.385  | 0.352 |
| Paxillin Y118 | 0.723 | 0.671 | 0.642  | 0.658  | 0.633 |
|               | 0.81  | 0.738 | 0.6397 | 0.643  | 0.655 |
|               | 0.737 | 0.652 | 0.626  | 0.609  | 0.607 |
|               | 0.743 | 0.661 | 0.651  | 0.643  | 0.614 |
| AKT S473      | 0.605 | 0.558 | 0.545  | 0.587  | 0.613 |
|               | 0.475 | 0.554 | 0.591  | 0.526  | 0.577 |
|               | 0.593 | 0.539 | 0.562  | 0.569  | 0.556 |
|               | 0.481 | 0.581 | 0.485  | 0.616  | 0.544 |
| GSK-3a/b S21  | 0.582 | 0.525 | 0.515  | 0.509  | 0.507 |
|               | 0.47  | 0.548 | 0.536  | 0.479  | 0.477 |
|               | 0.563 | 0.523 | 0.539  | 0.535  | 0.592 |
|               | 0.468 | 0.542 | 0.554  | 0.563  | 0.57  |
| RPS6 S235/S2  | 0.099 | 0.062 | 0.081  | 0.125  | 0.221 |
|               | 0.071 | 0.061 | 0.072  | 0.133  | 0.239 |
|               | 0.099 | 0.07  | 0.08   | 0.127  | 0.179 |
|               | 0.076 | 0.071 | 0.082  | 0.12   | 0.211 |
| RPS6 S240/S2  | 0.081 | 0.044 | 0.071  | 0.103  | 0.134 |
|               | 0.065 | 0.047 | 0.059  | 0.105  | 0.133 |
|               | 0.083 | 0.054 | 0.068  | 0.113  | 0.132 |
|               | 0.072 | 0.059 | 0.069  | 0.11   | 0.117 |
| PKCb S660     | 0.526 | 0.571 | 0.507  | 0.775  | 0.862 |
|               | 0.529 | 0.56  | 0.521  | 0.756  | 0.852 |
|               | 0.539 | 0.564 | 0.523  | 0.71   | 0.847 |
|               | 0.55  | 0.582 | 0.536  | 0.741  | 0.854 |
| PKCd S643     | 0.626 | 0.629 | 0.576  | 0.657  | 0.655 |
|               | 0.618 | 0.66  | 0.629  | 0.65   | 0.666 |
|               | 0.649 | 0.65  | 0.612  | 0.601  | 0.658 |
|               | 0.661 | 0.655 | 0.628  | 0.654  | 0.664 |
| MARCKs S512,  | 0.572 | 0.619 | 0.539  | 0.562  | 0.573 |
|               | 0.607 | 0.646 | 0.639  | 0.513  | 0.556 |
|               | 0.603 | 0.634 | 0.568  | 0.5403 | 0.533 |
|               | 0.61  | 0.631 | 0.605  | 0.546  | 0.548 |
| CAMI S81      | 0.573 | 0.546 | 0.552  | 0.579  | 0.606 |
|               | 0.585 | 0.55  | 0.583  | 0.567  | 0.627 |
|               | 0.602 | 0.557 | 0.554  | 0.534  | 0.57  |
|               | 0.587 | 0.548 | 0.601  | 0.597  | 0.572 |

|              |       |       |       |       |       |
|--------------|-------|-------|-------|-------|-------|
| RSK3 T356/S3 | 0.591 | 0.577 | 0.584 | 0.716 | 0.696 |
|              | 0.587 | 0.594 | 0.587 | 0.694 | 0.721 |
|              | 0.603 | 0.575 | 0.563 | 0.658 | 0.692 |
|              | 0.603 | 0.582 | 0.574 | 0.693 | 0.714 |
| RAF S289/S29 | 0.177 | 0.196 | 0.185 | 0.191 | 0.189 |
|              | 0.18  | 0.198 | 0.192 | 0.188 | 0.195 |
|              | 0.174 | 0.192 | 0.18  | 0.178 | 0.186 |
|              | 0.175 | 0.195 | 0.187 | 0.186 | 0.185 |
| MEK S217/S2  | 0.176 | 0.185 | 0.243 | 0.736 | 0.934 |
|              | 0.211 | 0.195 | 0.265 | 0.673 | 0.899 |
|              | 0.179 | 0.19  | 0.242 | 0.531 | 0.833 |
|              | 0.196 | 0.178 | 0.229 | 0.624 | 0.877 |
| ERK T202/Y20 | 0.193 | 0.175 | 0.18  | 0.322 | 0.342 |
|              | 0.183 | 0.183 | 0.209 | 0.293 | 0.363 |
|              | 0.196 | 0.17  | 0.172 | 0.21  | 0.303 |
|              | 0.16  | 0.158 | 0.186 | 0.27  | 0.314 |
| p90RSK S380  | 0.267 | 0.119 | 0.116 | 0.085 | 0.198 |
|              | 0.236 | 0.099 | 0.115 | 0.114 | 0.199 |
|              | 0.257 | 0.116 | 0.12  | 0.124 | 0.152 |
|              | 0.238 | 0.132 | 0.122 | 0.123 | 0.192 |
| STAT1 Y701   | 0.393 | 0.365 | 0.379 | 0.422 | 0.422 |
|              | 0.385 | 0.403 | 0.394 | 0.418 | 0.413 |
|              | 0.395 | 0.373 | 0.387 | 0.383 | 0.41  |
|              | 0.396 | 0.377 | 0.391 | 0.425 | 0.429 |
| STAT3 Y705   | 0.543 | 0.605 | 0.555 | 0.572 | 0.607 |
|              | 0.548 | 0.609 | 0.555 | 0.569 | 0.624 |
|              | 0.55  | 0.611 | 0.551 | 0.556 | 0.632 |
|              | 0.56  | 0.633 | 0.564 | 0.57  | 0.63  |
| CREB S133    | 0.583 | 0.573 | 0.639 | 0.814 | 0.918 |
|              | 0.629 | 0.648 | 0.708 | 0.795 | 0.926 |
|              | 0.603 | 0.661 | 0.694 | 0.706 | 0.841 |
|              | 0.619 | 0.614 | 0.682 | 0.829 | 0.885 |
| NF-kB S536   | 0.625 | 0.633 | 0.625 | 0.796 | 0.869 |
|              | 0.629 | 0.627 | 0.64  | 0.752 | 0.837 |
|              | 0.63  | 0.634 | 0.63  | 0.704 | 0.835 |
|              | 0.624 | 0.627 | 0.627 | 0.734 | 0.83  |
| c-Jun S63    | 0.037 | 0.038 | 0.04  | 0.041 | 0.047 |
|              | 0.052 | 0.047 | 0.043 | 0.039 | 0.055 |
|              | 0.043 | 0.041 | 0.043 | 0.039 | 0.038 |

|               |          |       |       |        |        |
|---------------|----------|-------|-------|--------|--------|
|               | 0.049    | 0.044 | 0.043 | 0.041  | 0.041  |
|               | ERK pool |       |       |        |        |
| PDGFRb Y771   | 0.289    | 0.309 | 0.305 | 0.297  | 0.316  |
|               | 0.312    | 0.35  | 0.352 | 0.322  | 0.3043 |
|               | 0.272    | 0.295 | 0.295 | 0.319  | 0.315  |
|               | 0.295    | 0.302 | 0.332 | 0.372  | 0.282  |
| SHC Y317      | 0.505    | 0.512 | 0.503 | 0.538  | 0.556  |
|               | 0.516    | 0.544 | 0.587 | 0.566  | 0.558  |
|               | 0.502    | 0.51  | 0.513 | 0.584  | 0.547  |
|               | 0.523    | 0.512 | 0.543 | 0.599  | 0.571  |
| c-Cbl Y774    | 0.46     | 0.419 | 0.413 | 0.379  | 0.41   |
|               | 0.418    | 0.398 | 0.419 | 0.365  | 0.405  |
|               | 0.485    | 0.422 | 0.386 | 0.424  | 0.422  |
|               | 0.427    | 0.413 | 0.406 | 0.402  | 0.402  |
| Paxillin Y118 | 0.7      | 0.655 | 0.586 | 0.668  | 0.641  |
|               | 0.633    | 0.632 | 0.607 | 0.695  | 0.625  |
|               | 0.731    | 0.666 | 0.6   | 0.664  | 0.665  |
|               | 0.722    | 0.667 | 0.708 | 0.638  | 0.732  |
| AKT S473      | 0.496    | 0.591 | 0.571 | 0.605  | 0.691  |
|               | 0.416    | 0.494 | 0.518 | 0.548  | 0.573  |
|               | 0.502    | 0.596 | 0.526 | 0.648  | 0.746  |
|               | 0.442    | 0.552 | 0.565 | 0.575  | 0.71   |
| GSK-3a/b S21  | 0.517    | 0.557 | 0.665 | 0.607  | 0.683  |
|               | 0.474    | 0.553 | 0.485 | 0.5943 | 0.549  |
|               | 0.566    | 0.605 | 0.571 | 0.637  | 0.622  |
|               | 0.525    | 0.514 | 0.625 | 0.539  | 0.57   |
| RPS6 S235/S2  | 0.121    | 0.127 | 0.135 | 0.175  | 0.179  |
|               | 0.091    | 0.101 | 0.109 | 0.142  | 0.143  |
|               | 0.1      | 0.113 | 0.109 | 0.13   | 0.164  |
|               | 0.112    | 0.131 | 0.122 | 0.127  | 0.154  |
| RPS6 S240/S2  | 0.087    | 0.104 | 0.103 | 0.122  | 0.118  |
|               | 0.08     | 0.087 | 0.102 | 0.095  | 0.101  |
|               | 0.088    | 0.091 | 0.081 | 0.099  | 0.111  |
|               | 0.094    | 0.099 | 0.088 | 0.115  | 0.11   |
| PKCb S660     | 0.638    | 0.619 | 0.679 | 0.626  | 0.876  |
|               | 0.612    | 0.69  | 0.674 | 0.686  | 0.99   |
|               | 0.575    | 0.596 | 0.61  | 0.738  | 0.793  |

|              |        |        |        |        |        |
|--------------|--------|--------|--------|--------|--------|
|              | 0.577  | 0.61   | 0.642  | 0.709  | 0.8    |
| PKCd S643    | 0.73   | 0.759  | 0.736  | 0.7    | 0.748  |
|              | 0.734  | 0.7453 | 0.7327 | 0.707  | 0.7387 |
|              | 0.717  | 0.74   | 0.726  | 0.734  | 0.726  |
|              | 0.736  | 0.737  | 0.736  | 0.7137 | 0.742  |
| MARCKs S512, | 0.602  | 0.601  | 0.571  | 0.711  | 0.564  |
|              | 0.505  | 0.533  | 0.565  | 0.733  | 0.55   |
|              | 0.611  | 0.601  | 0.628  | 0.604  | 0.606  |
|              | 0.721  | 0.762  | 0.802  | 0.597  | 0.78   |
| CAMI S81     | 0.408  | 0.404  | 0.428  | 0.444  | 0.423  |
|              | 0.505  | 0.575  | 0.546  | 0.586  | 0.671  |
|              | 0.49   | 0.477  | 0.437  | 0.479  | 0.493  |
|              | 0.533  | 0.533  | 0.572  | 0.545  | 0.556  |
| RSK3 T356/S3 | 0.612  | 0.599  | 0.65   | 0.655  | 0.765  |
|              | 0.517  | 0.563  | 0.672  | 0.62   | 0.776  |
|              | 0.599  | 0.6    | 0.644  | 0.639  | 0.783  |
|              | 0.552  | 0.583  | 0.659  | 0.639  | 0.852  |
| RAF S289/S29 | 0.214  | 0.209  | 0.178  | 0.157  | 0.187  |
|              | 0.193  | 0.199  | 0.183  | 0.182  | 0.188  |
|              | 0.203  | 0.192  | 0.161  | 0.185  | 0.181  |
|              | 0.175  | 0.148  | 0.131  | 0.189  | 0.16   |
| MEK S217/S22 | 0.215  | 0.218  | 0.5    | 0.511  | 1.288  |
|              | 0.174  | 0.192  | 0.421  | 0.586  | 1.029  |
|              | 0.191  | 0.218  | 0.474  | 0.628  | 1.2    |
|              | 0.189  | 0.206  | 0.468  | 0.474  | 1.034  |
| ERK T202/Y20 | 0.189  | 0.196  | 0.27   | 0.286  | 0.378  |
|              | 0.142  | 0.157  | 0.201  | 0.213  | 0.268  |
|              | 0.195  | 0.183  | 0.234  | 0.344  | 0.353  |
|              | 0.196  | 0.169  | 0.209  | 0.243  | 0.332  |
| p90RSK S380  | 0.113  | 0.131  | 0.191  | 0.135  | 0.505  |
|              | 0.102  | 0.129  | 0.164  | 0.191  | 0.368  |
|              | 0.1337 | 0.13   | 0.119  | 0.26   | 0.102  |
|              | 0.186  | 0.136  | 0.151  | 0.278  | 0.106  |
| STAT1 Y701   | 0.391  | 0.404  | 0.438  | 0.403  | 0.433  |
|              | 0.415  | 0.443  | 0.484  | 0.453  | 0.4383 |
|              | 0.386  | 0.405  | 0.436  | 0.417  | 0.433  |
|              | 0.406  | 0.406  | 0.447  | 0.489  | 0.449  |
| STAT3 Y705   | 0.634  | 0.62   | 0.63   | 0.598  | 0.625  |
|              | 0.669  | 0.685  | 0.724  | 0.692  | 0.752  |

|               |            |       |       |        |       |
|---------------|------------|-------|-------|--------|-------|
|               | 0.643      | 0.609 | 0.596 | 0.643  | 0.615 |
|               | 0.665      | 0.617 | 0.679 | 0.663  | 0.649 |
| CREB S133     | 0.755      | 0.685 | 0.84  | 0.8    | 0.939 |
|               | 0.793      | 0.747 | 0.936 | 0.797  | 1.204 |
|               | 0.735      | 0.598 | 0.776 | 0.934  | 0.874 |
|               | 0.741      | 0.651 | 0.855 | 1.017  | 0.914 |
| NF-kB S536    | 0.768      | 0.84  | 0.909 | 0.87   | 1.02  |
|               | 0.708      | 0.775 | 0.819 | 0.859  | 0.877 |
|               | 0.784      | 0.859 | 0.836 | 0.94   | 0.954 |
|               | 0.782      | 0.794 | 0.847 | 0.824  | 0.952 |
| c-Jun S63     | 0.064      | 0.069 | 0.061 | 0.061  | 0.072 |
|               | 0.055      | 0.053 | 0.052 | 0.0663 | 0.064 |
|               | 0.067      | 0.069 | 0.06  | 0.083  | 0.079 |
|               | 0.059      | 0.063 | 0.068 | 0.055  | 0.077 |
|               | p90RSK sh1 |       |       |        |       |
| PDGFRb Y771   | 0.276      | 0.3   | 0.292 | 0.295  | 0.287 |
|               | 0.279      | 0.301 | 0.323 | 0.329  | 0.311 |
|               | 0.299      | 0.321 | 0.319 | 0.31   | 0.295 |
|               | 0.306      | 0.333 | 0.322 | 0.332  | 0.32  |
| SHC Y317      | 0.447      | 0.491 | 0.483 | 0.499  | 0.545 |
|               | 0.452      | 0.488 | 0.5   | 0.531  | 0.545 |
|               | 0.454      | 0.504 | 0.492 | 0.523  | 0.557 |
|               | 0.459      | 0.499 | 0.501 | 0.534  | 0.578 |
| c-Cbl Y774    | 0.378      | 0.373 | 0.388 | 0.379  | 0.375 |
|               | 0.387      | 0.381 | 0.405 | 0.39   | 0.373 |
|               | 0.371      | 0.378 | 0.387 | 0.374  | 0.366 |
|               | 0.382      | 0.392 | 0.391 | 0.379  | 0.376 |
| Paxillin Y118 | 0.727      | 0.718 | 0.656 | 0.656  | 0.65  |
|               | 0.729      | 0.724 | 0.706 | 0.6593 | 0.671 |
|               | 0.709      | 0.71  | 0.665 | 0.66   | 0.66  |
|               | 0.735      | 0.718 | 0.678 | 0.662  | 0.668 |
| AKT S473      | 0.601      | 0.482 | 0.493 | 0.529  | 0.601 |
|               | 0.587      | 0.588 | 0.64  | 0.634  | 0.592 |
|               | 0.539      | 0.488 | 0.539 | 0.56   | 0.552 |
|               | 0.547      | 0.562 | 0.56  | 0.639  | 0.603 |
| GSK-3a/b S21  | 0.562      | 0.563 | 0.518 | 0.528  | 0.489 |
|               | 0.56       | 0.563 | 0.494 | 0.504  | 0.592 |

|              |        |        |       |       |       |
|--------------|--------|--------|-------|-------|-------|
|              | 0.564  | 0.529  | 0.514 | 0.526 | 0.562 |
|              | 0.562  | 0.557  | 0.542 | 0.472 | 0.571 |
| RPS6 S235/S2 | 0.136  | 0.106  | 0.106 | 0.149 | 0.225 |
|              | 0.125  | 0.122  | 0.144 | 0.172 | 0.245 |
|              | 0.128  | 0.107  | 0.114 | 0.147 | 0.217 |
|              | 0.126  | 0.114  | 0.113 | 0.164 | 0.247 |
| RPS6 S240/S2 | 0.102  | 0.06   | 0.068 | 0.112 | 0.162 |
|              | 0.086  | 0.076  | 0.104 | 0.147 | 0.193 |
|              | 0.096  | 0.098  | 0.111 | 0.159 | 0.19  |
|              | 0.115  | 0.111  | 0.114 | 0.151 | 0.191 |
| PKCb S660    | 0.54   | 0.552  | 0.521 | 0.609 | 0.83  |
|              | 0.554  | 0.548  | 0.553 | 0.68  | 0.793 |
|              | 0.563  | 0.555  | 0.543 | 0.648 | 0.793 |
|              | 0.5523 | 0.56   | 0.58  | 0.716 | 0.863 |
| PKCd S643    | 0.639  | 0.629  | 0.61  | 0.591 | 0.611 |
|              | 0.651  | 0.621  | 0.618 | 0.615 | 0.602 |
|              | 0.653  | 0.632  | 0.61  | 0.601 | 0.601 |
|              | 0.664  | 0.63   | 0.609 | 0.616 | 0.608 |
| MARCKs S512, | 0.633  | 0.6293 | 0.563 | 0.56  | 0.615 |
|              | 0.633  | 0.63   | 0.677 | 0.694 | 0.662 |
|              | 0.627  | 0.636  | 0.639 | 0.589 | 0.615 |
|              | 0.631  | 0.622  | 0.614 | 0.675 | 0.689 |
| CAMI S81     | 0.616  | 0.552  | 0.55  | 0.556 | 0.579 |
|              | 0.607  | 0.605  | 0.651 | 0.638 | 0.594 |
|              | 0.619  | 0.595  | 0.593 | 0.598 | 0.573 |
|              | 0.645  | 0.63   | 0.606 | 0.616 | 0.631 |
| RSK3 T356/S3 | 0.582  | 0.579  | 0.543 | 0.654 | 0.705 |
|              | 0.593  | 0.602  | 0.592 | 0.72  | 0.731 |
|              | 0.603  | 0.589  | 0.552 | 0.678 | 0.711 |
|              | 0.592  | 0.605  | 0.581 | 0.708 | 0.718 |
| RAF S289/S29 | 0.173  | 0.173  | 0.169 | 0.169 | 0.185 |
|              | 0.19   | 0.193  | 0.198 | 0.19  | 0.189 |
|              | 0.173  | 0.174  | 0.17  | 0.166 | 0.18  |
|              | 0.174  | 0.176  | 0.177 | 0.174 | 0.186 |
| MEK S217/S21 | 0.17   | 0.18   | 0.223 | 0.389 | 0.81  |
|              | 0.191  | 0.181  | 0.251 | 0.527 | 0.848 |
|              | 0.173  | 0.185  | 0.23  | 0.444 | 0.71  |
|              | 0.19   | 0.179  | 0.211 | 0.477 | 0.796 |
| ERK T202/Y20 | 0.376  | 0.337  | 0.377 | 0.714 | 0.724 |

|             |            |       |       |       |       |
|-------------|------------|-------|-------|-------|-------|
|             | 0.354      | 0.341 | 0.418 | 0.855 | 0.918 |
|             | 0.35       | 0.334 | 0.376 | 0.762 | 0.801 |
|             | 0.351      | 0.335 | 0.351 | 0.791 | 0.87  |
| p90RSK S380 | 0.138      | 0.105 | 0.109 | 0.113 | 0.131 |
|             | 0.202      | 0.096 | 0.104 | 0.103 | 0.167 |
|             | 0.217      | 0.116 | 0.102 | 0.109 | 0.173 |
|             | 0.233      | 0.12  | 0.122 | 0.103 | 0.17  |
| STAT1 Y701  | 0.374      | 0.388 | 0.387 | 0.402 | 0.451 |
|             | 0.375      | 0.381 | 0.393 | 0.419 | 0.446 |
|             | 0.382      | 0.394 | 0.401 | 0.397 | 0.454 |
|             | 0.382      | 0.393 | 0.397 | 0.42  | 0.446 |
| STAT3 Y705  | 0.545      | 0.584 | 0.595 | 0.579 | 0.62  |
|             | 0.55       | 0.567 | 0.6   | 0.572 | 0.613 |
|             | 0.575      | 0.602 | 0.615 | 0.587 | 0.617 |
|             | 0.568      | 0.588 | 0.61  | 0.596 | 0.616 |
| CREB S133   | 0.54       | 0.557 | 0.601 | 0.667 | 0.863 |
|             | 0.555      | 0.584 | 0.649 | 0.774 | 0.891 |
|             | 0.598      | 0.685 | 0.667 | 0.759 | 0.875 |
|             | 0.608      | 0.57  | 0.596 | 0.8   | 0.935 |
| NF-kB S536  | 0.576      | 0.585 | 0.618 | 0.636 | 0.736 |
|             | 0.624      | 0.634 | 0.682 | 0.691 | 0.737 |
|             | 0.6        | 0.616 | 0.64  | 0.658 | 0.719 |
|             | 0.611      | 0.611 | 0.633 | 0.66  | 0.719 |
| c-Jun S63   | 0.05       | 0.044 | 0.039 | 0.04  | 0.048 |
|             | 0.041      | 0.044 | 0.051 | 0.045 | 0.057 |
|             | 0.046      | 0.044 | 0.049 | 0.05  | 0.052 |
|             | 0.049      | 0.051 | 0.047 | 0.043 | 0.07  |
|             | p90RSK sh4 |       |       |       |       |
| PDGFRb Y771 | 0.29       | 0.266 | 0.257 | 0.269 | 0.282 |
|             | 0.289      | 0.28  | 0.276 | 0.277 | 0.278 |
|             | 0.287      | 0.291 | 0.263 | 0.27  | 0.303 |
|             | 0.287      | 0.284 | 0.294 | 0.25  | 0.27  |
| SHC Y317    | 0.408      | 0.448 | 0.43  | 0.5   | 0.489 |
|             | 0.41       | 0.463 | 0.461 | 0.525 | 0.491 |
|             | 0.401      | 0.457 | 0.431 | 0.497 | 0.486 |
|             | 0.405      | 0.448 | 0.446 | 0.439 | 0.469 |
| c-Cbl Y774  | 0.417      | 0.416 | 0.375 | 0.374 | 0.4   |

|               |       |        |       |        |       |
|---------------|-------|--------|-------|--------|-------|
|               | 0.417 | 0.416  | 0.419 | 0.387  | 0.403 |
|               | 0.399 | 0.383  | 0.362 | 0.375  | 0.407 |
|               | 0.396 | 0.382  | 0.39  | 0.348  | 0.399 |
| Paxillin Y118 | 0.699 | 0.742  | 0.651 | 0.699  | 0.686 |
|               | 0.705 | 0.764  | 0.679 | 0.711  | 0.691 |
|               | 0.714 | 0.751  | 0.645 | 0.71   | 0.692 |
|               | 0.698 | 0.754  | 0.699 | 0.652  | 0.694 |
| AKT S473      | 0.646 | 0.577  | 0.592 | 0.681  | 0.776 |
|               | 0.611 | 0.616  | 0.679 | 0.585  | 0.622 |
|               | 0.612 | 0.577  | 0.553 | 0.618  | 0.716 |
|               | 0.593 | 0.572  | 0.66  | 0.511  | 0.696 |
| GSK-3a/b S21  | 0.477 | 0.567  | 0.554 | 0.607  | 0.532 |
|               | 0.6   | 0.51   | 0.495 | 0.534  | 0.526 |
|               | 0.576 | 0.571  | 0.515 | 0.582  | 0.62  |
|               | 0.455 | 0.574  | 0.456 | 0.487  | 0.601 |
| RPS6 S235/S2  | 0.107 | 0.091  | 0.13  | 0.156  | 0.207 |
|               | 0.109 | 0.103  | 0.126 | 0.153  | 0.22  |
|               | 0.12  | 0.105  | 0.124 | 0.146  | 0.185 |
|               | 0.112 | 0.111  | 0.124 | 0.167  | 0.187 |
| RPS6 S240/S2  | 0.08  | 0.0737 | 0.077 | 0.11   | 0.137 |
|               | 0.071 | 0.067  | 0.072 | 0.111  | 0.138 |
|               | 0.086 | 0.079  | 0.079 | 0.115  | 0.128 |
|               | 0.076 | 0.075  | 0.084 | 0.158  | 0.127 |
| PKCb S660     | 0.536 | 0.564  | 0.534 | 0.649  | 0.784 |
|               | 0.536 | 0.573  | 0.556 | 0.689  | 0.804 |
|               | 0.541 | 0.522  | 0.49  | 0.584  | 0.701 |
|               | 0.542 | 0.519  | 0.52  | 0.539  | 0.66  |
| PKCd S643     | 0.634 | 0.642  | 0.612 | 0.642  | 0.608 |
|               | 0.639 | 0.635  | 0.632 | 0.654  | 0.622 |
|               | 0.638 | 0.622  | 0.581 | 0.61   | 0.584 |
|               | 0.625 | 0.617  | 0.623 | 0.58   | 0.567 |
| MARCKs S512,  | 0.739 | 0.716  | 0.636 | 0.644  | 0.668 |
|               | 0.747 | 0.749  | 0.734 | 0.698  | 0.612 |
|               | 0.707 | 0.678  | 0.638 | 0.651  | 0.68  |
|               | 0.75  | 0.724  | 0.729 | 0.6643 | 0.642 |
| CAMI S81      | 0.56  | 0.518  | 0.502 | 0.507  | 0.55  |
|               | 0.56  | 0.538  | 0.563 | 0.537  | 0.547 |
|               | 0.559 | 0.531  | 0.494 | 0.505  | 0.549 |
|               | 0.562 | 0.511  | 0.556 | 0.458  | 0.537 |

|              |        |       |       |       |       |
|--------------|--------|-------|-------|-------|-------|
| RSK3 T356/S3 | 0.5887 | 0.601 | 0.594 | 0.654 | 0.689 |
|              | 0.581  | 0.598 | 0.605 | 0.681 | 0.699 |
|              | 0.595  | 0.595 | 0.588 | 0.662 | 0.693 |
|              | 0.59   | 0.603 | 0.603 | 0.6   | 0.684 |
| RAF S289/S29 | 0.181  | 0.179 | 0.182 | 0.176 | 0.187 |
|              | 0.183  | 0.185 | 0.19  | 0.196 | 0.194 |
|              | 0.183  | 0.182 | 0.173 | 0.175 | 0.208 |
|              | 0.181  | 0.187 | 0.191 | 0.164 | 0.189 |
| MEK S217/S2  | 0.185  | 0.179 | 0.204 | 0.47  | 0.651 |
|              | 0.199  | 0.189 | 0.218 | 0.444 | 0.63  |
|              | 0.183  | 0.189 | 0.199 | 0.38  | 0.602 |
|              | 0.195  | 0.183 | 0.21  | 0.341 | 0.508 |
| ERK T202/Y20 | 0.367  | 0.355 | 0.401 | 0.755 | 0.995 |
|              | 0.359  | 0.357 | 0.419 | 0.828 | 0.996 |
|              | 0.374  | 0.348 | 0.384 | 0.73  | 0.941 |
|              | 0.346  | 0.337 | 0.399 | 0.61  | 0.874 |
| p90RSK S380  | 0.289  | 0.108 | 0.119 | 0.1   | 0.147 |
|              | 0.315  | 0.103 | 0.1   | 0.103 | 0.182 |
|              | 0.138  | 0.114 | 0.117 | 0.094 | 0.142 |
|              | 0.148  | 0.105 | 0.102 | 0.152 | 0.103 |
| STAT1 Y701   | 0.378  | 0.376 | 0.392 | 0.364 | 0.407 |
|              | 0.373  | 0.381 | 0.399 | 0.401 | 0.415 |
|              | 0.376  | 0.371 | 0.391 | 0.39  | 0.409 |
|              | 0.368  | 0.367 | 0.386 | 0.385 | 0.397 |
| STAT3 Y705   | 0.571  | 0.537 | 0.506 | 0.608 | 0.544 |
|              | 0.561  | 0.538 | 0.541 | 0.605 | 0.569 |
|              | 0.563  | 0.517 | 0.525 | 0.589 | 0.552 |
|              | 0.563  | 0.536 | 0.533 | 0.563 | 0.538 |
| CREB S133    | 0.577  | 0.534 | 0.555 | 0.695 | 0.831 |
|              | 0.595  | 0.577 | 0.647 | 0.754 | 0.795 |
|              | 0.562  | 0.596 | 0.558 | 0.647 | 0.79  |
|              | 0.562  | 0.555 | 0.564 | 0.553 | 0.764 |
| NF-kB S536   | 0.589  | 0.597 | 0.571 | 0.66  | 0.671 |
|              | 0.584  | 0.583 | 0.591 | 0.687 | 0.683 |
|              | 0.586  | 0.572 | 0.559 | 0.659 | 0.653 |
|              | 0.579  | 0.562 | 0.573 | 0.597 | 0.625 |
| c-Jun S63    | 0.05   | 0.054 | 0.05  | 0.042 | 0.056 |
|              | 0.051  | 0.064 | 0.053 | 0.05  | 0.06  |
|              | 0.051  | 0.06  | 0.053 | 0.049 | 0.059 |
|              | 0.055  | 0.062 | 0.056 | 0.037 | 0.046 |

|               | FAK sh16 |       |       |       |       |
|---------------|----------|-------|-------|-------|-------|
| PDGFRb Y771   | 0.289    | 0.287 | 0.278 | 0.283 | 0.261 |
|               | 0.295    | 0.303 | 0.302 | 0.315 | 0.248 |
|               | 0.296    | 0.309 | 0.281 | 0.293 | 0.259 |
|               | 0.313    | 0.315 | 0.302 | 0.318 | 0.278 |
| SHC Y317      | 0.393    | 0.46  | 0.461 | 0.46  | 0.457 |
|               | 0.402    | 0.446 | 0.471 | 0.492 | 0.455 |
|               | 0.401    | 0.462 | 0.464 | 0.474 | 0.484 |
|               | 0.407    | 0.461 | 0.472 | 0.501 | 0.507 |
| c-Cbl Y774    | 0.372    | 0.395 | 0.378 | 0.37  | 0.35  |
|               | 0.413    | 0.435 | 0.415 | 0.418 | 0.346 |
|               | 0.367    | 0.4   | 0.375 | 0.371 | 0.345 |
|               | 0.381    | 0.433 | 0.398 | 0.402 | 0.378 |
| Paxillin Y118 | 0.646    | 0.691 | 0.674 | 0.63  | 0.643 |
|               | 0.657    | 0.705 | 0.697 | 0.665 | 0.649 |
|               | 0.627    | 0.671 | 0.641 | 0.633 | 0.646 |
|               | 0.656    | 0.695 | 0.676 | 0.632 | 0.666 |
| AKT S473      | 0.649    | 0.608 | 0.609 | 0.634 | 0.725 |
|               | 0.615    | 0.643 | 0.652 | 0.7   | 0.648 |
|               | 0.535    | 0.556 | 0.526 | 0.631 | 0.686 |
|               | 0.542    | 0.626 | 0.577 | 0.544 | 0.583 |
| GSK-3a/b S21  | 0.482    | 0.555 | 0.45  | 0.508 | 0.491 |
|               | 0.453    | 0.455 | 0.483 | 0.535 | 0.47  |
|               | 0.516    | 0.517 | 0.499 | 0.48  | 0.487 |
|               | 0.423    | 0.421 | 0.439 | 0.509 | 0.471 |
| RPS6 S235/S2  | 0.145    | 0.116 | 0.134 | 0.178 | 0.245 |
|               | 0.148    | 0.124 | 0.154 | 0.188 | 0.237 |
|               | 0.135    | 0.113 | 0.126 | 0.152 | 0.254 |
|               | 0.133    | 0.121 | 0.151 | 0.189 | 0.24  |
| RPS6 S240/S2  | 0.133    | 0.073 | 0.11  | 0.167 | 0.213 |
|               | 0.13     | 0.089 | 0.135 | 0.18  | 0.193 |
|               | 0.129    | 0.101 | 0.128 | 0.175 | 0.203 |
|               | 0.135    | 0.117 | 0.148 | 0.188 | 0.157 |
| PKCb S660     | 0.522    | 0.51  | 0.523 | 0.682 | 0.763 |
|               | 0.559    | 0.537 | 0.545 | 0.745 | 0.703 |
|               | 0.532    | 0.551 | 0.52  | 0.745 | 0.733 |
|               | 0.575    | 0.552 | 0.566 | 0.732 | 0.733 |

|              |        |       |       |       |       |
|--------------|--------|-------|-------|-------|-------|
| PKCd S643    | 0.602  | 0.616 | 0.608 | 0.569 | 0.585 |
|              | 0.611  | 0.6   | 0.604 | 0.571 | 0.582 |
|              | 0.607  | 0.605 | 0.6   | 0.567 | 0.582 |
|              | 0.606  | 0.596 | 0.601 | 0.581 | 0.636 |
| MARCKs S512, | 0.663  | 0.753 | 0.682 | 0.664 | 0.622 |
|              | 0.641  | 0.795 | 0.751 | 0.718 | 0.577 |
|              | 0.643  | 0.781 | 0.619 | 0.694 | 0.656 |
|              | 0.652  | 0.7   | 0.729 | 0.724 | 0.667 |
| CAMI S81     | 0.562  | 0.536 | 0.55  | 0.535 | 0.527 |
|              | 0.591  | 0.607 | 0.611 | 0.59  | 0.532 |
|              | 0.553  | 0.558 | 0.559 | 0.577 | 0.563 |
|              | 0.615  | 0.613 | 0.592 | 0.601 | 0.625 |
| RSK3 T356/S3 | 0.592  | 0.555 | 0.531 | 0.573 | 0.666 |
|              | 0.592  | 0.549 | 0.549 | 0.616 | 0.674 |
|              | 0.573  | 0.53  | 0.53  | 0.591 | 0.688 |
|              | 0.565  | 0.539 | 0.548 | 0.632 | 0.775 |
| RAF S289/S29 | 0.181  | 0.186 | 0.189 | 0.182 | 0.176 |
|              | 0.187  | 0.192 | 0.197 | 0.188 | 0.189 |
|              | 0.177  | 0.174 | 0.183 | 0.177 | 0.187 |
|              | 0.182  | 0.187 | 0.192 | 0.184 | 0.19  |
| MEK S217/S22 | 0.169  | 0.171 | 0.229 | 0.437 | 0.55  |
|              | 0.175  | 0.175 | 0.237 | 0.494 | 0.499 |
|              | 0.1723 | 0.172 | 0.216 | 0.442 | 0.554 |
|              | 0.173  | 0.169 | 0.206 | 0.484 | 0.591 |
| ERK T202/Y20 | 0.361  | 0.334 | 0.411 | 0.718 | 0.909 |
|              | 0.341  | 0.347 | 0.424 | 0.649 | 0.885 |
|              | 0.35   | 0.329 | 0.381 | 0.726 | 0.883 |
|              | 0.328  | 0.333 | 0.38  | 0.78  | 0.921 |
| p90RSK S380  | 0.578  | 0.222 | 0.22  | 0.222 | 0.348 |
|              | 0.436  | 0.215 | 0.213 | 0.239 | 0.416 |
|              | 0.418  | 0.222 | 0.24  | 0.213 | 0.366 |
|              | 0.339  | 0.217 | 0.222 | 0.239 | 0.366 |
| STAT1 Y701   | 0.373  | 0.371 | 0.382 | 0.38  | 0.405 |
|              | 0.387  | 0.36  | 0.376 | 0.398 | 0.405 |
|              | 0.384  | 0.376 | 0.381 | 0.383 | 0.43  |
|              | 0.382  | 0.372 | 0.378 | 0.386 | 0.42  |
| STAT3 Y705   | 0.532  | 0.541 | 0.534 | 0.553 | 0.527 |
|              | 0.55   | 0.528 | 0.531 | 0.541 | 0.524 |
|              | 0.571  | 0.56  | 0.558 | 0.559 | 0.542 |

|               |          |        |        |       |       |
|---------------|----------|--------|--------|-------|-------|
|               | 0.564    | 0.546  | 0.555  | 0.567 | 0.525 |
| CREB S133     | 0.548    | 0.495  | 0.573  | 0.613 | 0.688 |
|               | 0.546    | 0.604  | 0.663  | 0.706 | 0.682 |
|               | 0.558    | 0.586  | 0.615  | 0.696 | 0.761 |
|               | 0.598    | 0.505  | 0.63   | 0.724 | 0.795 |
| NF-kB S536    | 0.537    | 0.622  | 0.62   | 0.728 | 0.724 |
|               | 0.587    | 0.631  | 0.628  | 0.726 | 0.697 |
|               | 0.551    | 0.617  | 0.599  | 0.706 | 0.699 |
|               | 0.548    | 0.586  | 0.591  | 0.677 | 0.685 |
| c-Jun S63     | 0.044    | 0.054  | 0.0553 | 0.047 | 0.047 |
|               | 0.053    | 0.0555 | 0.057  | 0.054 | 0.058 |
|               | 0.055    | 0.057  | 0.052  | 0.054 | 0.056 |
|               | 0.055    | 0.0555 | 0.057  | 0.052 | 0.074 |
|               | FAK sh21 |        |        |       |       |
| PDGFRb Y771   | 0.278    | 0.289  | 0.27   | 0.271 | 0.283 |
|               | 0.281    | 0.3    | 0.284  | 0.278 | 0.27  |
|               | 0.27     | 0.283  | 0.269  | 0.271 | 0.298 |
|               | 0.2763   | 0.275  | 0.252  | 0.253 | 0.301 |
| SHC Y317      | 0.392    | 0.451  | 0.468  | 0.52  | 0.49  |
|               | 0.402    | 0.484  | 0.532  | 0.536 | 0.458 |
|               | 0.412    | 0.45   | 0.472  | 0.516 | 0.481 |
|               | 0.362    | 0.433  | 0.418  | 0.464 | 0.482 |
| c-Cbl Y774    | 0.405    | 0.445  | 0.407  | 0.432 | 0.404 |
|               | 0.419    | 0.448  | 0.413  | 0.432 | 0.38  |
|               | 0.412    | 0.436  | 0.365  | 0.421 | 0.401 |
|               | 0.412    | 0.403  | 0.354  | 0.372 | 0.401 |
| Paxillin Y118 | 0.673    | 0.705  | 0.682  | 0.659 | 0.725 |
|               | 0.73     | 0.71   | 0.699  | 0.667 | 0.675 |
|               | 0.682    | 0.695  | 0.665  | 0.676 | 0.724 |
|               | 0.695    | 0.686  | 0.621  | 0.625 | 0.729 |
| AKT S473      | 0.529    | 0.548  | 0.537  | 0.578 | 0.619 |
|               | 0.513    | 0.498  | 0.562  | 0.654 | 0.652 |
|               | 0.511    | 0.493  | 0.505  | 0.538 | 0.579 |
|               | 0.5177   | 0.45   | 0.418  | 0.514 | 0.56  |
| GSK-3a/b S21  | 0.557    | 0.561  | 0.541  | 0.531 | 0.535 |
|               | 0.571    | 0.577  | 0.46   | 0.528 | 0.54  |
|               | 0.544    | 0.521  | 0.504  | 0.503 | 0.507 |

|              |        |       |        |        |       |
|--------------|--------|-------|--------|--------|-------|
|              | 0.5573 | 0.472 | 0.393  | 0.466  | 0.493 |
| RPS6 S235/S2 | 0.103  | 0.085 | 0.088  | 0.132  | 0.259 |
|              | 0.095  | 0.086 | 0.093  | 0.149  | 0.289 |
|              | 0.088  | 0.093 | 0.095  | 0.13   | 0.278 |
|              | 0.115  | 0.092 | 0.103  | 0.121  | 0.242 |
| RPS6 S240/S2 | 0.068  | 0.05  | 0.049  | 0.081  | 0.129 |
|              | 0.063  | 0.054 | 0.057  | 0.088  | 0.147 |
|              | 0.062  | 0.061 | 0.063  | 0.085  | 0.126 |
|              | 0.0643 | 0.056 | 0.086  | 0.108  | 0.124 |
| PKCb S660    | 0.577  | 0.594 | 0.554  | 0.804  | 0.976 |
|              | 0.578  | 0.582 | 0.561  | 0.845  | 0.766 |
|              | 0.593  | 0.574 | 0.502  | 0.712  | 0.933 |
|              | 0.5827 | 0.531 | 0.463  | 0.593  | 0.9   |
| PKCd S643    | 0.646  | 0.64  | 0.658  | 0.634  | 0.658 |
|              | 0.609  | 0.675 | 0.67   | 0.645  | 0.645 |
|              | 0.612  | 0.653 | 0.626  | 0.642  | 0.66  |
|              | 0.6223 | 0.626 | 0.591  | 0.6403 | 0.672 |
| MARCKs S512, | 0.623  | 0.661 | 0.622  | 0.593  | 0.55  |
|              | 0.631  | 0.679 | 0.667  | 0.583  | 0.444 |
|              | 0.646  | 0.655 | 0.617  | 0.598  | 0.537 |
|              | 0.6333 | 0.584 | 0.6353 | 0.448  | 0.544 |
| CAMI S81     | 0.552  | 0.587 | 0.546  | 0.568  | 0.53  |
|              | 0.569  | 0.591 | 0.607  | 0.566  | 0.493 |
|              | 0.564  | 0.561 | 0.526  | 0.563  | 0.527 |
|              | 0.5617 | 0.542 | 0.486  | 0.516  | 0.557 |
| RSK3 T356/S3 | 0.593  | 0.637 | 0.647  | 0.699  | 0.742 |
|              | 0.617  | 0.649 | 0.664  | 0.729  | 0.688 |
|              | 0.621  | 0.636 | 0.641  | 0.701  | 0.744 |
|              | 0.564  | 0.625 | 0.606  | 0.637  | 0.755 |
| RAF S289/S29 | 0.176  | 0.198 | 0.19   | 0.199  | 0.205 |
|              | 0.184  | 0.203 | 0.199  | 0.196  | 0.195 |
|              | 0.181  | 0.191 | 0.185  | 0.195  | 0.202 |
|              | 0.1803 | 0.194 | 0.1913 | 0.1967 | 0.204 |
| MEK S217/S2: | 0.177  | 0.19  | 0.259  | 0.838  | 1.022 |
|              | 0.207  | 0.191 | 0.289  | 0.874  | 0.742 |
|              | 0.179  | 0.189 | 0.241  | 0.847  | 0.99  |
|              | 0.167  | 0.169 | 0.19   | 0.498  | 0.964 |
| ERK T202/Y20 | 0.382  | 0.378 | 0.454  | 0.744  | 0.881 |
|              | 0.372  | 0.376 | 0.481  | 0.794  | 0.95  |

|             |             |       |       |        |       |
|-------------|-------------|-------|-------|--------|-------|
|             | 0.373       | 0.359 | 0.427 | 0.724  | 0.868 |
|             | 0.316       | 0.341 | 0.374 | 0.706  | 0.858 |
| p90RSK S380 | 0.4593      | 0.2   | 0.235 | 0.213  | 0.469 |
|             | 0.419       | 0.208 | 0.216 | 0.246  | 0.51  |
|             | 0.401       | 0.21  | 0.233 | 0.209  | 0.436 |
|             | 0.558       | 0.166 | 0.264 | 0.215  | 0.328 |
| STAT1 Y701  | 0.352       | 0.381 | 0.371 | 0.393  | 0.417 |
|             | 0.359       | 0.393 | 0.382 | 0.409  | 0.392 |
|             | 0.344       | 0.37  | 0.356 | 0.382  | 0.401 |
|             | 0.334       | 0.36  | 0.335 | 0.357  | 0.4   |
| STAT3 Y705  | 0.527       | 0.567 | 0.559 | 0.563  | 0.564 |
|             | 0.545       | 0.566 | 0.535 | 0.5573 | 0.555 |
|             | 0.505       | 0.546 | 0.543 | 0.56   | 0.555 |
|             | 0.512       | 0.536 | 0.519 | 0.549  | 0.561 |
| CREB S133   | 0.568       | 0.628 | 0.633 | 0.75   | 0.85  |
|             | 0.609       | 0.66  | 0.681 | 0.782  | 0.723 |
|             | 0.582       | 0.611 | 0.581 | 0.695  | 0.787 |
|             | 0.5863      | 0.563 | 0.496 | 0.591  | 0.811 |
| NF-kB S536  | 0.604       | 0.631 | 0.638 | 0.715  | 0.746 |
|             | 0.609       | 0.609 | 0.668 | 0.761  | 0.687 |
|             | 0.604       | 0.602 | 0.638 | 0.715  | 0.787 |
|             | 0.6057      | 0.578 | 0.582 | 0.611  | 0.796 |
| c-Jun S63   | 0.057       | 0.058 | 0.051 | 0.061  | 0.102 |
|             | 0.072       | 0.072 | 0.071 | 0.073  | 0.082 |
|             | 0.062       | 0.067 | 0.062 | 0.073  | 0.1   |
|             | 0.0637      | 0.063 | 0.056 | 0.052  | 0.101 |
|             | P130CAS sh3 |       |       |        |       |
| PDGFRb Y771 | 0.32        | 0.29  | 0.28  | 0.28   | 0.294 |
|             | 0.304       | 0.313 | 0.276 | 0.277  | 0.286 |
|             | 0.316       | 0.312 | 0.283 | 0.288  | 0.29  |
|             | 0.313       | 0.318 | 0.298 | 0.295  | 0.303 |
| SHC Y317    | 0.414       | 0.448 | 0.466 | 0.486  | 0.505 |
|             | 0.412       | 0.471 | 0.474 | 0.505  | 0.497 |
|             | 0.422       | 0.49  | 0.482 | 0.52   | 0.514 |
|             | 0.411       | 0.48  | 0.497 | 0.539  | 0.544 |
| c-Cbl Y774  | 0.427       | 0.426 | 0.406 | 0.424  | 0.407 |
|             | 0.407       | 0.425 | 0.419 | 0.44   | 0.423 |

|               |       |       |        |       |       |
|---------------|-------|-------|--------|-------|-------|
|               | 0.413 | 0.418 | 0.392  | 0.438 | 0.422 |
|               | 0.418 | 0.429 | 0.41   | 0.413 | 0.421 |
| Paxillin Y118 | 0.817 | 0.754 | 0.709  | 0.753 | 0.719 |
|               | 0.798 | 0.755 | 0.745  | 0.794 | 0.731 |
|               | 0.797 | 0.742 | 0.701  | 0.796 | 0.753 |
|               | 0.814 | 0.776 | 0.734  | 0.791 | 0.748 |
| AKT S473      | 0.563 | 0.626 | 0.487  | 0.534 | 0.619 |
|               | 0.592 | 0.601 | 0.491  | 0.553 | 0.575 |
|               | 0.621 | 0.576 | 0.54   | 0.492 | 0.569 |
|               | 0.592 | 0.583 | 0.472  | 0.506 | 0.561 |
| GSK-3a/b S21  | 0.53  | 0.598 | 0.563  | 0.496 | 0.581 |
|               | 0.625 | 0.601 | 0.575  | 0.501 | 0.559 |
|               | 0.597 | 0.562 | 0.505  | 0.463 | 0.535 |
|               | 0.576 | 0.551 | 0.54   | 0.482 | 0.563 |
| RPS6 S235/S2  | 0.109 | 0.063 | 0.077  | 0.147 | 0.288 |
|               | 0.093 | 0.08  | 0.088  | 0.148 | 0.279 |
|               | 0.108 | 0.085 | 0.101  | 0.149 | 0.26  |
|               | 0.088 | 0.09  | 0.098  | 0.142 | 0.267 |
| RPS6 S240/S2  | 0.093 | 0.053 | 0.078  | 0.116 | 0.168 |
|               | 0.073 | 0.065 | 0.082  | 0.127 | 0.174 |
|               | 0.084 | 0.065 | 0.085  | 0.116 | 0.158 |
|               | 0.072 | 0.079 | 0.085  | 0.117 | 0.169 |
| PKCb S660     | 0.554 | 0.546 | 0.535  | 0.7   | 0.99  |
|               | 0.531 | 0.538 | 0.527  | 0.703 | 0.948 |
|               | 0.562 | 0.583 | 0.541  | 0.712 | 1.012 |
|               | 0.566 | 0.58  | 0.573  | 0.737 | 0.986 |
| PKCd S643     | 0.623 | 0.625 | 0.665  | 0.633 | 0.639 |
|               | 0.609 | 0.649 | 0.675  | 0.636 | 0.639 |
|               | 0.622 | 0.652 | 0.668  | 0.649 | 0.639 |
|               | 0.623 | 0.651 | 0.6693 | 0.688 | 0.639 |
| MARCKs S512,  | 0.722 | 0.752 | 0.742  | 0.741 | 0.688 |
|               | 0.688 | 0.786 | 0.739  | 0.76  | 0.676 |
|               | 0.697 | 0.75  | 0.7443 | 0.732 | 0.67  |
|               | 0.689 | 0.758 | 0.752  | 0.786 | 0.673 |
| CAMI S81      | 0.584 | 0.522 | 0.521  | 0.533 | 0.512 |
|               | 0.516 | 0.563 | 0.566  | 0.569 | 0.507 |
|               | 0.562 | 0.564 | 0.521  | 0.571 | 0.541 |
|               | 0.577 | 0.584 | 0.582  | 0.595 | 0.565 |
| RSK3 T356/S3  | 0.616 | 0.571 | 0.557  | 0.613 | 0.651 |

|              |       |        |        |       |       |
|--------------|-------|--------|--------|-------|-------|
|              | 0.581 | 0.626  | 0.564  | 0.614 | 0.655 |
|              | 0.589 | 0.58   | 0.558  | 0.612 | 0.65  |
|              | 0.581 | 0.593  | 0.568  | 0.628 | 0.654 |
| RAF S289/S29 | 0.189 | 0.178  | 0.183  | 0.176 | 0.183 |
|              | 0.181 | 0.183  | 0.191  | 0.179 | 0.181 |
|              | 0.178 | 0.177  | 0.176  | 0.19  | 0.177 |
|              | 0.189 | 0.191  | 0.2    | 0.195 | 0.195 |
| MEK S217/S2  | 0.191 | 0.181  | 0.246  | 0.542 | 0.841 |
|              | 0.2   | 0.185  | 0.236  | 0.585 | 0.783 |
|              | 0.188 | 0.184  | 0.209  | 0.508 | 0.742 |
|              | 0.194 | 0.19   | 0.231  | 0.578 | 0.784 |
| ERK T202/Y20 | 0.441 | 0.371  | 0.408  | 0.73  | 0.958 |
|              | 0.391 | 0.372  | 0.419  | 0.815 | 0.982 |
|              | 0.422 | 0.361  | 0.36   | 0.686 | 0.889 |
|              | 0.381 | 0.369  | 0.401  | 0.751 | 0.94  |
| p90RSK S380  | 0.532 | 0.233  | 0.219  | 0.217 | 0.355 |
|              | 0.544 | 0.192  | 0.225  | 0.215 | 0.397 |
|              | 0.527 | 0.222  | 0.2243 | 0.204 | 0.356 |
|              | 0.722 | 0.216  | 0.229  | 0.226 | 0.408 |
| STAT1 Y701   | 0.367 | 0.367  | 0.351  | 0.409 | 0.417 |
|              | 0.365 | 0.382  | 0.347  | 0.405 | 0.418 |
|              | 0.383 | 0.404  | 0.345  | 0.429 | 0.413 |
|              | 0.38  | 0.3843 | 0.371  | 0.43  | 0.444 |
| STAT3 Y705   | 0.581 | 0.583  | 0.558  | 0.571 | 0.575 |
|              | 0.57  | 0.6    | 0.571  | 0.574 | 0.57  |
|              | 0.61  | 0.636  | 0.55   | 0.602 | 0.604 |
|              | 0.591 | 0.641  | 0.591  | 0.605 | 0.609 |
| CREB S133    | 0.578 | 0.51   | 0.557  | 0.654 | 0.795 |
|              | 0.559 | 0.607  | 0.607  | 0.701 | 0.769 |
|              | 0.587 | 0.626  | 0.592  | 0.701 | 0.796 |
|              | 0.607 | 0.659  | 0.624  | 0.772 | 0.849 |
| NF-kB S536   | 0.598 | 0.626  | 0.615  | 0.721 | 0.814 |
|              | 0.583 | 0.627  | 0.615  | 0.717 | 0.777 |
|              | 0.567 | 0.6    | 0.583  | 0.685 | 0.763 |
|              | 0.568 | 0.63   | 0.614  | 0.667 | 0.758 |
| c-Jun S63    | 0.055 | 0.054  | 0.045  | 0.053 | 0.054 |
|              | 0.054 | 0.06   | 0.051  | 0.053 | 0.05  |
|              | 0.047 | 0.053  | 0.036  | 0.035 | 0.049 |
|              | 0.049 | 0.05   | 0.041  | 0.04  | 0.056 |

|               | P130CAS sh5 |       |       |       |       |
|---------------|-------------|-------|-------|-------|-------|
| PDGFRb Y771   | 0.307       | 0.289 | 0.299 | 0.294 | 0.276 |
|               | 0.304       | 0.31  | 0.302 | 0.284 | 0.283 |
|               | 0.285       | 0.285 | 0.292 | 0.285 | 0.277 |
|               | 0.282       | 0.295 | 0.31  | 0.279 | 0.277 |
| SHC Y317      | 0.459       | 0.479 | 0.497 | 0.531 | 0.511 |
|               | 0.441       | 0.489 | 0.513 | 0.52  | 0.526 |
|               | 0.425       | 0.461 | 0.491 | 0.514 | 0.512 |
|               | 0.412       | 0.468 | 0.504 | 0.488 | 0.515 |
| c-Cbl Y774    | 0.418       | 0.375 | 0.369 | 0.402 | 0.399 |
|               | 0.42        | 0.387 | 0.385 | 0.396 | 0.382 |
|               | 0.417       | 0.394 | 0.389 | 0.433 | 0.406 |
|               | 0.424       | 0.393 | 0.382 | 0.402 | 0.409 |
| Paxillin Y118 | 0.74        | 0.701 | 0.655 | 0.687 | 0.675 |
|               | 0.772       | 0.733 | 0.675 | 0.634 | 0.683 |
|               | 0.744       | 0.704 | 0.669 | 0.7   | 0.697 |
|               | 0.772       | 0.714 | 0.693 | 0.654 | 0.703 |
| AKT S473      | 0.491       | 0.549 | 0.548 | 0.65  | 0.725 |
|               | 0.48        | 0.559 | 0.571 | 0.651 | 0.615 |
|               | 0.506       | 0.566 | 0.552 | 0.656 | 0.58  |
|               | 0.483       | 0.543 | 0.555 | 0.591 | 0.61  |
| GSK-3a/b S21  | 0.59        | 0.559 | 0.501 | 0.591 | 0.603 |
|               | 0.574       | 0.58  | 0.567 | 0.55  | 0.665 |
|               | 0.594       | 0.59  | 0.525 | 0.607 | 0.527 |
|               | 0.599       | 0.606 | 0.576 | 0.506 | 0.544 |
| RPS6 S235/S2  | 0.129       | 0.097 | 0.136 | 0.174 | 0.315 |
|               | 0.107       | 0.09  | 0.131 | 0.196 | 0.307 |
|               | 0.139       | 0.115 | 0.134 | 0.168 | 0.308 |
|               | 0.115       | 0.119 | 0.132 | 0.178 | 0.327 |
| RPS6 S240/S2  | 0.144       | 0.11  | 0.171 | 0.181 | 0.229 |
|               | 0.116       | 0.101 | 0.165 | 0.212 | 0.256 |
|               | 0.158       | 0.13  | 0.174 | 0.184 | 0.225 |
|               | 0.13        | 0.141 | 0.172 | 0.215 | 0.22  |
| PKCb S660     | 0.644       | 0.591 | 0.597 | 0.874 | 1.085 |
|               | 0.543       | 0.602 | 0.606 | 0.843 | 1.13  |
|               | 0.532       | 0.565 | 0.561 | 0.792 | 1.014 |
|               | 0.535       | 0.551 | 0.557 | 0.731 | 1.093 |

|              |        |       |       |        |       |
|--------------|--------|-------|-------|--------|-------|
| PKCd S643    | 0.6563 | 0.629 | 0.644 | 0.687  | 0.678 |
|              | 0.668  | 0.654 | 0.673 | 0.657  | 0.679 |
|              | 0.65   | 0.644 | 0.631 | 0.649  | 0.644 |
|              | 0.651  | 0.628 | 0.654 | 0.626  | 0.661 |
| MARCKs S512, | 0.584  | 0.642 | 0.548 | 0.559  | 0.566 |
|              | 0.607  | 0.69  | 0.615 | 0.505  | 0.551 |
|              | 0.581  | 0.656 | 0.555 | 0.578  | 0.54  |
|              | 0.602  | 0.64  | 0.614 | 0.5473 | 0.587 |
| CAMI S81     | 0.557  | 0.575 | 0.546 | 0.545  | 0.594 |
|              | 0.586  | 0.621 | 0.575 | 0.522  | 0.561 |
|              | 0.541  | 0.581 | 0.526 | 0.54   | 0.533 |
|              | 0.544  | 0.569 | 0.528 | 0.488  | 0.568 |
| RSK3 T356/S3 | 0.582  | 0.576 | 0.559 | 0.621  | 0.619 |
|              | 0.606  | 0.596 | 0.612 | 0.581  | 0.639 |
|              | 0.569  | 0.609 | 0.581 | 0.627  | 0.64  |
|              | 0.585  | 0.607 | 0.59  | 0.583  | 0.668 |
| RAF S289/S29 | 0.169  | 0.176 | 0.162 | 0.177  | 0.179 |
|              | 0.181  | 0.185 | 0.17  | 0.166  | 0.178 |
|              | 0.17   | 0.181 | 0.166 | 0.18   | 0.18  |
|              | 0.178  | 0.182 | 0.171 | 0.17   | 0.187 |
| MEK S217/S22 | 0.193  | 0.177 | 0.24  | 0.499  | 0.57  |
|              | 0.183  | 0.198 | 0.245 | 0.452  | 0.581 |
|              | 0.18   | 0.185 | 0.237 | 0.561  | 0.625 |
|              | 0.19   | 0.202 | 0.25  | 0.415  | 0.652 |
| ERK T202/Y20 | 0.419  | 0.41  | 0.499 | 0.907  | 1.079 |
|              | 0.4    | 0.443 | 0.506 | 0.904  | 1.105 |
|              | 0.438  | 0.418 | 0.481 | 0.942  | 1.129 |
|              | 0.399  | 0.434 | 0.478 | 0.843  | 1.171 |
| p90RSK S380  | 0.446  | 0.265 | 0.285 | 0.239  | 0.414 |
|              | 0.477  | 0.285 | 0.27  | 0.253  | 0.394 |
|              | 0.505  | 0.243 | 0.248 | 0.226  | 0.435 |
|              | 0.519  | 0.246 | 0.24  | 0.255  | 0.383 |
| STAT1 Y701   | 0.388  | 0.365 | 0.359 | 0.421  | 0.4   |
|              | 0.383  | 0.37  | 0.36  | 0.401  | 0.422 |
|              | 0.392  | 0.376 | 0.372 | 0.421  | 0.426 |
|              | 0.389  | 0.376 | 0.374 | 0.385  | 0.435 |
| STAT3 Y705   | 0.635  | 0.573 | 0.565 | 0.56   | 0.586 |
|              | 0.616  | 0.624 | 0.573 | 0.545  | 0.589 |
|              | 0.593  | 0.598 | 0.558 | 0.586  | 0.615 |
|              | 0.604  | 0.601 | 0.599 | 0.528  | 0.625 |

|               |          |       |        |        |       |
|---------------|----------|-------|--------|--------|-------|
| CREB S133     | 0.588    | 0.58  | 0.594  | 0.749  | 0.82  |
|               | 0.627    | 0.671 | 0.639  | 0.726  | 0.812 |
|               | 0.562    | 0.585 | 0.58   | 0.708  | 0.747 |
|               | 0.575    | 0.639 | 0.588  | 0.643  | 0.798 |
| NF-kB S536    | 0.61     | 0.616 | 0.623  | 0.728  | 0.775 |
|               | 0.628    | 0.649 | 0.629  | 0.687  | 0.77  |
|               | 0.619    | 0.636 | 0.632  | 0.74   | 0.776 |
|               | 0.615    | 0.632 | 0.625  | 0.663  | 0.784 |
| c-Jun S63     | 0.043    | 0.053 | 0.044  | 0.042  | 0.048 |
|               | 0.042    | 0.055 | 0.05   | 0.036  | 0.049 |
|               | 0.056    | 0.055 | 0.052  | 0.053  | 0.055 |
|               | 0.065    | 0.057 | 0.057  | 0.04   | 0.06  |
| PDGFRb Y771   | FAK pool |       |        |        |       |
|               | 0.307    | 0.32  | 0.323  | 0.352  | 0.349 |
|               | 0.288    | 0.3   | 0.313  | 0.344  | 0.329 |
|               | 0.311    | 0.329 | 0.309  | 0.317  | 0.359 |
|               | 0.292    | 0.297 | 0.311  | 0.312  | 0.356 |
| SHC Y317      | 0.475    | 0.497 | 0.531  | 0.5263 | 0.543 |
|               | 0.477    | 0.481 | 0.501  | 0.54   | 0.526 |
|               | 0.513    | 0.493 | 0.513  | 0.515  | 0.531 |
|               | 0.472    | 0.481 | 0.506  | 0.524  | 0.521 |
| c-Cbl Y774    | 0.398    | 0.413 | 0.409  | 0.461  | 0.388 |
|               | 0.411    | 0.416 | 0.424  | 0.461  | 0.389 |
|               | 0.436    | 0.416 | 0.431  | 0.396  | 0.416 |
|               | 0.459    | 0.443 | 0.442  | 0.417  | 0.427 |
| Paxillin Y118 | 0.702    | 0.713 | 0.619  | 0.697  | 0.634 |
|               | 0.654    | 0.643 | 0.635  | 0.72   | 0.639 |
|               | 0.692    | 0.662 | 0.646  | 0.673  | 0.673 |
|               | 0.699    | 0.692 | 0.682  | 0.628  | 0.702 |
| AKT S473      | 0.481    | 0.542 | 0.57   | 0.619  | 0.653 |
|               | 0.458    | 0.477 | 0.576  | 0.603  | 0.606 |
|               | 0.488    | 0.559 | 0.555  | 0.5943 | 0.615 |
|               | 0.48     | 0.547 | 0.563  | 0.561  | 0.75  |
| GSK-3a/b S21  | 0.457    | 0.496 | 0.511  | 0.6    | 0.611 |
|               | 0.542    | 0.529 | 0.475  | 0.525  | 0.593 |
|               | 0.619    | 0.639 | 0.5057 | 0.518  | 0.725 |
|               | 0.582    | 0.588 | 0.531  | 0.52   | 0.588 |

|              |        |       |       |       |       |
|--------------|--------|-------|-------|-------|-------|
| RPS6 S235/S2 | 0.104  | 0.107 | 0.124 | 0.163 | 0.207 |
|              | 0.106  | 0.098 | 0.125 | 0.162 | 0.2   |
|              | 0.103  | 0.125 | 0.137 | 0.083 | 0.175 |
|              | 0.099  | 0.125 | 0.136 | 0.123 | 0.18  |
| RPS6 S240/S2 | 0.09   | 0.096 | 0.117 | 0.14  | 0.126 |
|              | 0.093  | 0.087 | 0.118 | 0.158 | 0.14  |
|              | 0.091  | 0.098 | 0.113 | 0.091 | 0.101 |
|              | 0.087  | 0.101 | 0.134 | 0.122 | 0.124 |
| PKCb S660    | 0.618  | 0.628 | 0.669 | 0.802 | 1.055 |
|              | 0.566  | 0.566 | 0.611 | 0.708 | 0.955 |
|              | 0.651  | 0.655 | 0.716 | 0.733 | 1.051 |
|              | 0.565  | 0.616 | 0.683 | 0.7   | 0.982 |
| PKCd S643    | 0.715  | 0.696 | 0.677 | 0.825 | 0.742 |
|              | 0.687  | 0.669 | 0.648 | 0.778 | 0.682 |
|              | 0.773  | 0.742 | 0.681 | 0.73  | 0.719 |
|              | 0.723  | 0.707 | 0.712 | 0.762 | 0.754 |
| MARCKs S512, | 0.604  | 0.654 | 0.602 | 0.625 | 0.631 |
|              | 0.587  | 0.653 | 0.629 | 0.631 | 0.62  |
|              | 0.577  | 0.584 | 0.565 | 0.616 | 0.591 |
|              | 0.555  | 0.587 | 0.601 | 0.627 | 0.61  |
| CAMI S81     | 0.465  | 0.569 | 0.539 | 0.579 | 0.594 |
|              | 0.408  | 0.393 | 0.414 | 0.564 | 0.434 |
|              | 0.538  | 0.51  | 0.483 | 0.49  | 0.57  |
|              | 0.509  | 0.469 | 0.535 | 0.423 | 0.558 |
| RSK3 T356/S3 | 0.585  | 0.619 | 0.673 | 0.799 | 0.874 |
|              | 0.6    | 0.603 | 0.678 | 0.777 | 0.884 |
|              | 0.618  | 0.581 | 0.649 | 0.718 | 0.835 |
|              | 0.603  | 0.604 | 0.682 | 0.755 | 0.882 |
| RAF S289/S29 | 0.195  | 0.195 | 0.181 | 0.21  | 0.209 |
|              | 0.197  | 0.188 | 0.188 | 0.187 | 0.209 |
|              | 0.2    | 0.193 | 0.182 | 0.184 | 0.212 |
|              | 0.1973 | 0.197 | 0.175 | 0.196 | 0.22  |
| MEK S217/S22 | 0.202  | 0.189 | 0.374 | 0.562 | 0.951 |
|              | 0.19   | 0.183 | 0.447 | 0.6   | 0.916 |
|              | 0.179  | 0.199 | 0.473 | 0.564 | 0.899 |
|              | 0.186  | 0.205 | 0.528 | 0.553 | 0.929 |
| ERK T202/Y20 | 0.365  | 0.378 | 0.669 | 0.758 | 0.979 |
|              | 0.355  | 0.367 | 0.658 | 0.969 | 1     |
|              | 0.352  | 0.36  | 0.672 | 0.667 | 1.017 |

|             |          |        |        |       |        |
|-------------|----------|--------|--------|-------|--------|
|             | 0.394    | 0.381  | 0.75   | 0.687 | 1.287  |
| p90RSK S380 | 0.255    | 0.237  | 0.372  | 0.338 | 0.719  |
|             | 0.234    | 0.244  | 0.337  | 0.332 | 0.664  |
|             | 0.44     | 0.283  | 0.312  | 0.374 | 0.345  |
|             | 0.451    | 0.283  | 0.311  | 0.452 | 0.302  |
| STAT1 Y701  | 0.411    | 0.434  | 0.434  | 0.449 | 0.472  |
|             | 0.411    | 0.412  | 0.4    | 0.423 | 0.45   |
|             | 0.419    | 0.424  | 0.412  | 0.431 | 0.454  |
|             | 0.395    | 0.404  | 0.399  | 0.436 | 0.446  |
| STAT3 Y705  | 0.626    | 0.65   | 0.61   | 0.633 | 0.651  |
|             | 0.608    | 0.619  | 0.582  | 0.619 | 0.611  |
|             | 0.675    | 0.671  | 0.587  | 0.602 | 0.6263 |
|             | 0.596    | 0.621  | 0.583  | 0.573 | 0.617  |
| CREB S133   | 0.769    | 0.663  | 0.885  | 1.017 | 1.15   |
|             | 0.706    | 0.641  | 0.888  | 0.963 | 1.054  |
|             | 0.798    | 0.627  | 0.91   | 0.956 | 1.106  |
|             | 0.704    | 0.576  | 0.92   | 0.994 | 1.058  |
| NF-kB S536  | 0.706    | 0.717  | 0.838  | 0.94  | 0.977  |
|             | 0.696    | 0.684  | 0.807  | 0.935 | 0.965  |
|             | 0.737    | 0.739  | 0.89   | 0.831 | 1.009  |
|             | 0.761    | 0.746  | 0.909  | 0.823 | 1.007  |
| c-Jun S63   | 0.047    | 0.071  | 0.0677 | 0.068 | 0.072  |
|             | 0.052    | 0.069  | 0.069  | 0.073 | 0.08   |
|             | 0.054    | 0.065  | 0.067  | 0.069 | 0.071  |
|             | 0.056    | 0.073  | 0.067  | 0.066 | 0.081  |
|             | PAK1 sh7 |        |        |       |        |
| PDGFRb Y771 | 0.267    | 0.277  | 0.303  | 0.281 | 0.28   |
|             | 0.266    | 0.285  | 0.304  | 0.284 | 0.289  |
|             | 0.277    | 0.304  | 0.325  | 0.319 | 0.31   |
|             | 0.304    | 0.307  | 0.323  | 0.319 | 0.308  |
| SHC Y317    | 0.411    | 0.47   | 0.512  | 0.524 | 0.506  |
|             | 0.413    | 0.49   | 0.517  | 0.503 | 0.517  |
|             | 0.455    | 0.508  | 0.534  | 0.561 | 0.54   |
|             | 0.456    | 0.514  | 0.543  | 0.547 | 0.534  |
| c-Cbl Y774  | 0.413    | 0.41   | 0.421  | 0.429 | 0.414  |
|             | 0.422    | 0.416  | 0.411  | 0.389 | 0.424  |
|             | 0.4175   | 0.4157 | 0.394  | 0.404 | 0.399  |

|               |        |       |       |       |       |
|---------------|--------|-------|-------|-------|-------|
|               | 0.4175 | 0.421 | 0.387 | 0.449 | 0.429 |
| Paxillin Y118 | 0.726  | 0.689 | 0.721 | 0.668 | 0.661 |
|               | 0.754  | 0.715 | 0.711 | 0.658 | 0.667 |
|               | 0.785  | 0.73  | 0.728 | 0.7   | 0.688 |
|               | 0.787  | 0.744 | 0.744 | 0.721 | 0.696 |
| AKT S473      | 0.616  | 0.617 | 0.618 | 0.711 | 0.707 |
|               | 0.6    | 0.585 | 0.576 | 0.639 | 0.714 |
|               | 0.642  | 0.595 | 0.598 | 0.67  | 0.671 |
|               | 0.632  | 0.577 | 0.568 | 0.74  | 0.645 |
| GSK-3a/b S21  | 0.556  | 0.486 | 0.531 | 0.619 | 0.634 |
|               | 0.551  | 0.515 | 0.514 | 0.601 | 0.678 |
|               | 0.612  | 0.522 | 0.546 | 0.664 | 0.605 |
|               | 0.59   | 0.515 | 0.517 | 0.635 | 0.614 |
| RPS6 S235/S2  | 0.096  | 0.06  | 0.062 | 0.108 | 0.174 |
|               | 0.071  | 0.056 | 0.06  | 0.108 | 0.208 |
|               | 0.088  | 0.063 | 0.065 | 0.113 | 0.182 |
|               | 0.07   | 0.067 | 0.075 | 0.099 | 0.212 |
| RPS6 S240/S2  | 0.09   | 0.065 | 0.079 | 0.118 | 0.157 |
|               | 0.071  | 0.062 | 0.084 | 0.133 | 0.168 |
|               | 0.118  | 0.114 | 0.104 | 0.133 | 0.147 |
|               | 0.104  | 0.113 | 0.108 | 0.121 | 0.135 |
| PKCb S660     | 0.602  | 0.581 | 0.571 | 0.789 | 0.936 |
|               | 0.619  | 0.582 | 0.55  | 0.732 | 0.986 |
|               | 0.597  | 0.609 | 0.57  | 0.778 | 0.938 |
|               | 0.606  | 0.59  | 0.559 | 0.787 | 0.979 |
| PKCd S643     | 0.665  | 0.691 | 0.695 | 0.684 | 0.665 |
|               | 0.657  | 0.699 | 0.687 | 0.682 | 0.685 |
|               | 0.608  | 0.718 | 0.724 | 0.74  | 0.716 |
|               | 0.754  | 0.71  | 0.714 | 0.747 | 0.725 |
| MARCKs S512,  | 0.78   | 0.767 | 0.796 | 0.782 | 0.788 |
|               | 0.791  | 0.793 | 0.732 | 0.757 | 0.791 |
|               | 0.77   | 0.761 | 0.759 | 0.792 | 0.77  |
|               | 0.775  | 0.767 | 0.731 | 0.803 | 0.779 |
| CAMI S81      | 0.765  | 0.758 | 0.78  | 0.789 | 0.784 |
|               | 0.707  | 0.764 | 0.793 | 0.757 | 0.734 |
|               | 0.73   | 0.738 | 0.789 | 0.818 | 0.766 |
|               | 0.734  | 0.75  | 0.758 | 0.788 | 0.765 |
| RSK3 T356/S3  | 0.567  | 0.578 | 0.573 | 0.648 | 0.705 |
|               | 0.562  | 0.596 | 0.581 | 0.633 | 0.732 |

|              |        |       |       |        |       |
|--------------|--------|-------|-------|--------|-------|
|              | 0.597  | 0.6   | 0.589 | 0.682  | 0.699 |
|              | 0.595  | 0.596 | 0.588 | 0.695  | 0.718 |
| RAF S289/S29 | 0.196  | 0.176 | 0.2   | 0.192  | 0.195 |
|              | 0.179  | 0.181 | 0.183 | 0.19   | 0.207 |
|              | 0.202  | 0.192 | 0.194 | 0.2    | 0.203 |
|              | 0.205  | 0.197 | 0.194 | 0.207  | 0.204 |
| MEK S217/S22 | 0.171  | 0.184 | 0.245 | 0.441  | 0.603 |
|              | 0.184  | 0.195 | 0.226 | 0.473  | 0.779 |
|              | 0.21   | 0.241 | 0.24  | 0.533  | 0.669 |
|              | 0.233  | 0.23  | 0.239 | 0.524  | 0.685 |
| ERK T202/Y20 | 0.453  | 0.405 | 0.489 | 0.808  | 0.99  |
|              | 0.437  | 0.439 | 0.444 | 0.792  | 1.043 |
|              | 0.462  | 0.401 | 0.447 | 0.84   | 0.994 |
|              | 0.418  | 0.395 | 0.446 | 0.86   | 1.046 |
| p90RSK S380  | 0.399  | 0.259 | 0.273 | 0.27   | 0.408 |
|              | 0.446  | 0.257 | 0.286 | 0.284  | 0.375 |
|              | 0.556  | 0.326 | 0.291 | 0.264  | 0.439 |
|              | 0.547  | 0.287 | 0.294 | 0.268  | 0.433 |
| STAT1 Y701   | 0.406  | 0.396 | 0.417 | 0.45   | 0.425 |
|              | 0.41   | 0.406 | 0.424 | 0.433  | 0.443 |
|              | 0.404  | 0.4   | 0.411 | 0.457  | 0.44  |
|              | 0.4067 | 0.402 | 0.423 | 0.447  | 0.441 |
| STAT3 Y705   | 0.581  | 0.601 | 0.595 | 0.599  | 0.572 |
|              | 0.566  | 0.622 | 0.601 | 0.598  | 0.6   |
|              | 0.585  | 0.649 | 0.629 | 0.653  | 0.636 |
|              | 0.627  | 0.659 | 0.605 | 0.662  | 0.628 |
| CREB S133    | 0.52   | 0.568 | 0.667 | 0.747  | 0.886 |
|              | 0.581  | 0.652 | 0.646 | 0.706  | 0.888 |
|              | 0.466  | 0.722 | 0.738 | 0.857  | 0.931 |
|              | 0.678  | 0.723 | 0.729 | 0.895  | 0.974 |
| NF-kB S536   | 0.632  | 0.61  | 0.625 | 0.703  | 0.655 |
|              | 0.636  | 0.62  | 0.62  | 0.621  | 0.702 |
|              | 0.607  | 0.565 | 0.581 | 0.661  | 0.659 |
|              | 0.617  | 0.569 | 0.594 | 0.648  | 0.636 |
| c-Jun S63    | 0.044  | 0.043 | 0.04  | 0.049  | 0.049 |
|              | 0.04   | 0.039 | 0.04  | 0.042  | 0.054 |
|              | 0.044  | 0.051 | 0.045 | 0.0503 | 0.059 |
|              | 0.055  | 0.058 | 0.053 | 0.06   | 0.054 |

|               | PAK1 sh8 |       |       |        |       |
|---------------|----------|-------|-------|--------|-------|
| PDGFRb Y771   | 0.316    | 0.302 | 0.291 | 0.287  | 0.269 |
|               | 0.318    | 0.312 | 0.3   | 0.289  | 0.284 |
|               | 0.302    | 0.282 | 0.281 | 0.278  | 0.264 |
|               | 0.285    | 0.281 | 0.275 | 0.265  | 0.259 |
| SHC Y317      | 0.457    | 0.447 | 0.501 | 0.503  | 0.549 |
|               | 0.45     | 0.467 | 0.53  | 0.524  | 0.543 |
|               | 0.473    | 0.428 | 0.503 | 0.493  | 0.511 |
|               | 0.423    | 0.448 | 0.495 | 0.5067 | 0.482 |
| c-Cbl Y774    | 0.326    | 0.375 | 0.402 | 0.398  | 0.389 |
|               | 0.335    | 0.399 | 0.424 | 0.407  | 0.395 |
|               | 0.406    | 0.408 | 0.421 | 0.411  | 0.407 |
|               | 0.406    | 0.416 | 0.428 | 0.398  | 0.392 |
| Paxillin Y118 | 0.652    | 0.608 | 0.603 | 0.64   | 0.641 |
|               | 0.67     | 0.601 | 0.661 | 0.665  | 0.663 |
|               | 0.719    | 0.642 | 0.645 | 0.664  | 0.678 |
|               | 0.703    | 0.673 | 0.674 | 0.675  | 0.652 |
| AKT S473      | 0.619    | 0.581 | 0.555 | 0.581  | 0.592 |
|               | 0.606    | 0.525 | 0.619 | 0.687  | 0.714 |
|               | 0.654    | 0.516 | 0.574 | 0.501  | 0.573 |
|               | 0.589    | 0.507 | 0.601 | 0.62   | 0.641 |
| GSK-3a/b S21  | 0.533    | 0.534 | 0.491 | 0.51   | 0.619 |
|               | 0.583    | 0.567 | 0.604 | 0.573  | 0.632 |
|               | 0.597    | 0.513 | 0.51  | 0.545  | 0.613 |
|               | 0.57     | 0.488 | 0.546 | 0.523  | 0.572 |
| RPS6 S235/S2  | 0.101    | 0.087 | 0.15  | 0.195  | 0.275 |
|               | 0.104    | 0.089 | 0.107 | 0.17   | 0.244 |
|               | 0.126    | 0.098 | 0.108 | 0.146  | 0.229 |
|               | 0.092    | 0.106 | 0.127 | 0.148  | 0.232 |
| RPS6 S240/S2  | 0.08     | 0.096 | 0.181 | 0.244  | 0.227 |
|               | 0.108    | 0.088 | 0.111 | 0.188  | 0.221 |
|               | 0.138    | 0.11  | 0.12  | 0.162  | 0.204 |
|               | 0.101    | 0.131 | 0.134 | 0.159  | 0.206 |
| PKCb S660     | 0.608    | 0.601 | 0.54  | 0.665  | 0.905 |
|               | 0.656    | 0.59  | 0.585 | 0.744  | 0.953 |
|               | 0.628    | 0.539 | 0.531 | 0.69   | 0.855 |
|               | 0.579    | 0.536 | 0.542 | 0.54   | 0.779 |
| PKCd S643     | 0.64     | 0.678 | 0.641 | 0.651  | 0.695 |

|              |       |       |       |       |       |
|--------------|-------|-------|-------|-------|-------|
|              | 0.677 | 0.716 | 0.705 | 0.714 | 0.673 |
|              | 0.676 | 0.652 | 0.652 | 0.674 | 0.673 |
|              | 0.63  | 0.675 | 0.64  | 0.642 | 0.65  |
| MARCKs S512, | 0.841 | 0.799 | 0.658 | 0.64  | 0.825 |
|              | 0.85  | 0.813 | 0.8   | 0.728 | 0.775 |
|              | 0.708 | 0.736 | 0.73  | 0.761 | 0.776 |
|              | 0.739 | 0.733 | 0.707 | 0.724 | 0.727 |
| CAMI S81     | 1.163 | 0.823 | 0.797 | 0.922 | 0.834 |
|              | 0.939 | 0.865 | 0.856 | 0.815 | 0.957 |
|              | 0.875 | 0.833 | 0.72  | 0.743 | 0.658 |
|              | 0.795 | 0.771 | 0.886 | 0.822 | 0.777 |
| RSK3 T356/S3 | 0.531 | 0.562 | 0.551 | 0.632 | 0.695 |
|              | 0.547 | 0.571 | 0.561 | 0.665 | 0.725 |
|              | 0.552 | 0.553 | 0.551 | 0.667 | 0.719 |
|              | 0.531 | 0.572 | 0.564 | 0.589 | 0.677 |
| RAF S289/S29 | 0.188 | 0.189 | 0.191 | 0.182 | 0.213 |
|              | 0.194 | 0.199 | 0.196 | 0.188 | 0.211 |
|              | 0.202 | 0.192 | 0.189 | 0.185 | 0.208 |
|              | 0.194 | 0.195 | 0.191 | 0.186 | 0.203 |
| MEK S217/S2  | 0.176 | 0.192 | 0.193 | 0.351 | 0.563 |
|              | 0.187 | 0.197 | 0.224 | 0.445 | 0.531 |
|              | 0.195 | 0.192 | 0.213 | 0.418 | 0.528 |
|              | 0.177 | 0.196 | 0.217 | 0.177 | 0.449 |
| ERK T202/Y20 | 0.374 | 0.388 | 0.385 | 0.685 | 0.963 |
|              | 0.381 | 0.393 | 0.422 | 0.802 | 0.999 |
|              | 0.448 | 0.405 | 0.412 | 0.749 | 0.898 |
|              | 0.395 | 0.418 | 0.424 | 0.442 | 0.873 |
| p90RSK S380  | 0.131 | 0.239 | 0.245 | 0.22  | 0.246 |
|              | 0.148 | 0.229 | 0.223 | 0.231 | 0.314 |
|              | 0.43  | 0.249 | 0.254 | 0.235 | 0.351 |
|              | 0.437 | 0.245 | 0.259 | 0.254 | 0.279 |
| STAT1 Y701   | 0.387 | 0.404 | 0.396 | 0.435 | 0.401 |
|              | 0.411 | 0.425 | 0.411 | 0.441 | 0.414 |
|              | 0.398 | 0.391 | 0.386 | 0.424 | 0.399 |
|              | 0.376 | 0.397 | 0.387 | 0.399 | 0.391 |
| STAT3 Y705   | 0.551 | 0.576 | 0.576 | 0.564 | 0.559 |
|              | 0.57  | 0.604 | 0.594 | 0.58  | 0.578 |
|              | 0.576 | 0.55  | 0.591 | 0.563 | 0.582 |
|              | 0.567 | 0.562 | 0.587 | 0.558 | 0.571 |

|               |                  |        |        |       |       |
|---------------|------------------|--------|--------|-------|-------|
| CREB S133     | 0.587            | 0.5667 | 0.521  | 0.57  | 0.872 |
|               | 0.615            | 0.584  | 0.627  | 0.687 | 0.889 |
|               | 0.565            | 0.539  | 0.588  | 0.629 | 0.823 |
|               | 0.576            | 0.577  | 0.6    | 0.524 | 0.771 |
| NF-kB S536    | 0.566            | 0.566  | 0.541  | 0.617 | 0.661 |
|               | 0.588            | 0.587  | 0.573  | 0.65  | 0.692 |
|               | 0.61             | 0.599  | 0.563  | 0.655 | 0.717 |
|               | 0.599            | 0.583  | 0.588  | 0.599 | 0.676 |
| c-Jun S63     | 0.052            | 0.057  | 0.044  | 0.042 | 0.052 |
|               | 0.047            | 0.045  | 0.045  | 0.051 | 0.063 |
|               | 0.051            | 0.046  | 0.044  | 0.049 | 0.063 |
|               | 0.051            | 0.057  | 0.055  | 0.046 | 0.056 |
| PDGFRb Y771   | ROCK2 4<br>0.313 | 0.306  | 0.233  | 0.285 | 0.272 |
|               | 0.298            | 0.302  | 0.286  | 0.308 | 0.309 |
|               | 0.316            | 0.336  | 0.327  | 0.367 | 0.368 |
|               | 0.286            | 0.319  | 0.291  | 0.344 | 0.286 |
| SHC Y317      | 0.499            | 0.56   | 0.509  | 0.54  | 0.453 |
|               | 0.551            | 0.581  | 0.626  | 0.595 | 0.564 |
|               | 0.533            | 0.581  | 0.631  | 0.621 | 0.629 |
|               | 0.477            | 0.526  | 0.581  | 0.599 | 0.498 |
| c-Cbl Y774    | 0.426            | 0.402  | 0.35   | 0.352 | 0.351 |
|               | 0.421            | 0.376  | 0.397  | 0.346 | 0.396 |
|               | 0.418            | 0.428  | 0.443  | 0.41  | 0.427 |
|               | 0.388            | 0.421  | 0.443  | 0.392 | 0.384 |
| Paxillin Y118 | 0.678            | 0.659  | 0.6357 | 0.566 | 0.586 |
|               | 0.669            | 0.631  | 0.608  | 0.629 | 0.68  |
|               | 0.651            | 0.678  | 0.635  | 0.647 | 0.691 |
|               | 0.64             | 0.705  | 0.664  | 0.648 | 0.645 |
| AKT S473      | 0.461            | 0.606  | 0.414  | 0.436 | 0.535 |
|               | 0.443            | 0.46   | 0.518  | 0.474 | 0.532 |
|               | 0.475            | 0.61   | 0.612  | 0.635 | 0.705 |
|               | 0.465            | 0.586  | 0.639  | 0.586 | 0.63  |
| GSK-3a/b S21  | 0.568            | 0.665  | 0.442  | 0.474 | 0.512 |
|               | 0.557            | 0.571  | 0.586  | 0.533 | 0.653 |
|               | 0.579            | 0.641  | 0.654  | 0.628 | 0.581 |
|               | 0.524            | 0.686  | 0.704  | 0.676 | 0.636 |

|              |        |        |        |        |        |
|--------------|--------|--------|--------|--------|--------|
| RPS6 S235/S2 | 0.109  | 0.129  | 0.1337 | 0.212  | 0.252  |
|              | 0.118  | 0.116  | 0.129  | 0.156  | 0.189  |
|              | 0.121  | 0.135  | 0.136  | 0.14   | 0.233  |
|              | 0.129  | 0.137  | 0.136  | 0.142  | 0.203  |
| RPS6 S240/S2 | 0.108  | 0.1167 | 0.1193 | 0.1363 | 0.276  |
|              | 0.107  | 0.125  | 0.13   | 0.16   | 0.183  |
|              | 0.094  | 0.114  | 0.117  | 0.129  | 0.143  |
|              | 0.096  | 0.111  | 0.111  | 0.12   | 0.169  |
| PKCb S660    | 0.556  | 0.586  | 0.527  | 0.549  | 0.765  |
|              | 0.554  | 0.613  | 0.621  | 0.65   | 0.937  |
|              | 0.57   | 0.667  | 0.72   | 0.772  | 1.123  |
|              | 0.52   | 0.619  | 0.656  | 0.694  | 0.811  |
| PKCd S643    | 0.81   | 0.784  | 0.652  | 0.729  | 0.657  |
|              | 0.78   | 0.793  | 0.765  | 0.76   | 0.756  |
|              | 0.793  | 0.813  | 0.802  | 0.834  | 0.794  |
|              | 0.696  | 0.733  | 0.713  | 0.768  | 0.662  |
| MARCKs S512, | 0.638  | 0.71   | 0.665  | 0.496  | 0.472  |
|              | 0.665  | 0.66   | 0.635  | 0.592  | 0.627  |
|              | 0.642  | 0.72   | 0.666  | 0.706  | 0.691  |
|              | 0.6483 | 0.674  | 0.694  | 0.662  | 0.559  |
| CAMI S81     | 0.601  | 0.635  | 0.501  | 0.568  | 0.607  |
|              | 0.588  | 0.511  | 0.564  | 0.519  | 0.686  |
|              | 0.572  | 0.63   | 0.697  | 0.766  | 0.852  |
|              | 0.459  | 0.538  | 0.612  | 0.566  | 0.588  |
| RSK3 T356/S3 | 0.555  | 0.544  | 0.485  | 0.539  | 0.541  |
|              | 0.547  | 0.524  | 0.565  | 0.551  | 0.618  |
|              | 0.518  | 0.557  | 0.592  | 0.636  | 0.796  |
|              | 0.516  | 0.578  | 0.609  | 0.649  | 0.629  |
| RAF S289/S29 | 0.179  | 0.179  | 0.157  | 0.163  | 0.172  |
|              | 0.174  | 0.165  | 0.175  | 0.167  | 0.183  |
|              | 0.188  | 0.193  | 0.19   | 0.214  | 0.222  |
|              | 0.174  | 0.187  | 0.195  | 0.197  | 0.186  |
| MEK S217/S2: | 0.2    | 0.185  | 0.191  | 0.316  | 0.514  |
|              | 0.198  | 0.189  | 0.298  | 0.428  | 0.687  |
|              | 0.18   | 0.192  | 0.409  | 0.524  | 0.6217 |
|              | 0.174  | 0.203  | 0.41   | 0.602  | 0.664  |
| ERK T202/Y20 | 0.385  | 0.401  | 0.562  | 0.635  | 0.865  |
|              | 0.384  | 0.361  | 0.63   | 0.723  | 0.839  |
|              | 0.372  | 0.387  | 0.774  | 0.737  | 1.085  |
|              | 0.376  | 0.387  | 0.75   | 0.703  | 0.759  |

|             |         |        |        |       |       |
|-------------|---------|--------|--------|-------|-------|
| p90RSK S380 | 0.299   | 0.251  | 0.315  | 0.233 | 0.271 |
|             | 0.267   | 0.243  | 0.259  | 0.307 | 0.393 |
|             | 0.294   | 0.286  | 0.277  | 0.289 | 0.344 |
|             | 0.336   | 0.31   | 0.35   | 0.438 | 0.792 |
| STAT1 Y701  | 0.42    | 0.42   | 0.445  | 0.372 | 0.401 |
|             | 0.415   | 0.428  | 0.421  | 0.434 | 0.447 |
|             | 0.438   | 0.452  | 0.474  | 0.473 | 0.481 |
|             | 0.407   | 0.436  | 0.44   | 0.448 | 0.427 |
| STAT3 Y705  | 0.653   | 0.694  | 0.574  | 0.599 | 0.59  |
|             | 0.624   | 0.638  | 0.638  | 0.66  | 0.651 |
|             | 0.687   | 0.791  | 0.757  | 0.716 | 0.74  |
|             | 0.677   | 0.73   | 0.718  | 0.723 | 0.695 |
| CREB S133   | 0.738   | 0.669  | 0.577  | 0.724 | 0.826 |
|             | 0.848   | 0.711  | 0.879  | 0.94  | 1.095 |
|             | 0.867   | 0.863  | 1.033  | 1.198 | 1.409 |
|             | 0.719   | 0.713  | 0.874  | 0.993 | 0.873 |
| NF-kB S536  | 0.673   | 0.794  | 0.8147 | 0.713 | 0.746 |
|             | 0.724   | 0.775  | 0.787  | 0.809 | 0.826 |
|             | 0.743   | 0.864  | 0.868  | 0.869 | 0.931 |
|             | 0.683   | 0.818  | 0.789  | 0.872 | 0.8   |
| c-Jun S63   | 0.048   | 0.048  | 0.027  | 0.036 | 0.044 |
|             | 0.042   | 0.042  | 0.04   | 0.037 | 0.052 |
|             | 0.048   | 0.0493 | 0.053  | 0.07  | 0.067 |
|             | 0.039   | 0.058  | 0.054  | 0.067 | 0.053 |
| PDGFRb Y771 | 0.26    | 0.312  | 0.263  | 0.269 | 0.234 |
|             | 0.305   | 0.309  | 0.312  | 0.289 | 0.299 |
|             | 0.237   | 0.343  | 0.355  | 0.318 | 0.305 |
|             | 0.339   | 0.361  | 0.395  | 0.357 | 0.357 |
| SHC Y317    | 0.472   | 0.539  | 0.482  | 0.542 | 0.474 |
|             | 0.528   | 0.57   | 0.598  | 0.605 | 0.589 |
|             | 0.421   | 0.513  | 0.569  | 0.582 | 0.542 |
|             | 0.486   | 0.544  | 0.596  | 0.611 | 0.612 |
| c-Cbl Y774  | 0.377   | 0.382  | 0.347  | 0.399 | 0.333 |
|             | 0.428   | 0.373  | 0.401  | 0.399 | 0.37  |
|             | 0.344   | 0.454  | 0.466  | 0.452 | 0.421 |
|             | 0.472   | 0.434  | 0.449  | 0.469 | 0.468 |
|             | ROCK2 6 |        |        |       |       |

|               |       |       |        |       |       |
|---------------|-------|-------|--------|-------|-------|
| Paxillin Y118 | 0.722 | 0.679 | 0.607  | 0.603 | 0.542 |
|               | 0.685 | 0.64  | 0.633  | 0.574 | 0.576 |
|               | 0.608 | 0.772 | 0.789  | 0.703 | 0.739 |
|               | 0.856 | 0.753 | 0.769  | 0.782 | 0.776 |
| AKT S473      | 0.389 | 0.553 | 0.436  | 0.517 | 0.551 |
|               | 0.424 | 0.487 | 0.529  | 0.487 | 0.749 |
|               | 0.353 | 0.597 | 0.653  | 0.639 | 0.859 |
|               | 0.514 | 0.636 | 0.675  | 0.67  | 0.759 |
| GSK-3a/b S21  | 0.503 | 0.596 | 0.529  | 0.619 | 0.528 |
|               | 0.591 | 0.6   | 0.652  | 0.673 | 0.737 |
|               | 0.497 | 0.776 | 0.737  | 0.679 | 0.733 |
|               | 0.853 | 0.843 | 0.784  | 0.844 | 0.937 |
| RPS6 S235/S2  | 0.088 | 0.108 | 0.133  | 0.152 | 0.192 |
|               | 0.091 | 0.095 | 0.12   | 0.143 | 0.192 |
|               | 0.096 | 0.117 | 0.133  | 0.123 | 0.219 |
|               | 0.103 | 0.123 | 0.137  | 0.134 | 0.238 |
| RPS6 S240/S2  | 0.065 | 0.087 | 0.115  | 0.133 | 0.123 |
|               | 0.064 | 0.071 | 0.097  | 0.121 | 0.103 |
|               | 0.067 | 0.082 | 0.091  | 0.087 | 0.121 |
|               | 0.061 | 0.08  | 0.088  | 0.103 | 0.119 |
| PKCb S660     | 0.532 | 0.578 | 0.595  | 0.689 | 0.686 |
|               | 0.589 | 0.617 | 0.701  | 0.762 | 0.95  |
|               | 0.498 | 0.631 | 0.715  | 0.843 | 0.914 |
|               | 0.631 | 0.624 | 0.85   | 0.817 | 1.02  |
| PKCd S643     | 0.704 | 0.719 | 0.7553 | 0.733 | 0.746 |
|               | 0.77  | 0.776 | 0.76   | 0.806 | 0.778 |
|               | 0.629 | 0.714 | 0.733  | 0.731 | 0.671 |
|               | 0.779 | 0.745 | 0.773  | 0.783 | 0.789 |
| MARCKs S512,  | 0.527 | 0.659 | 0.458  | 0.571 | 0.452 |
|               | 0.62  | 0.671 | 0.596  | 0.576 | 0.607 |
|               | 0.502 | 0.715 | 0.684  | 0.775 | 0.673 |
|               | 0.691 | 0.723 | 0.739  | 0.731 | 0.741 |
| CAMI S81      | 0.486 | 0.623 | 0.537  | 0.497 | 0.447 |
|               | 0.652 | 0.628 | 0.61   | 0.532 | 0.659 |
|               | 0.502 | 0.745 | 0.798  | 0.609 | 0.694 |
|               | 0.934 | 0.902 | 1.063  | 0.72  | 0.811 |
| RSK3 T356/S3  | 0.519 | 0.592 | 0.575  | 0.633 | 0.623 |
|               | 0.538 | 0.555 | 0.616  | 0.644 | 0.755 |
|               | 0.484 | 0.624 | 0.839  | 0.741 | 0.836 |

|              |        |       |        |       |        |
|--------------|--------|-------|--------|-------|--------|
|              | 0.598  | 0.631 | 0.756  | 0.763 | 0.923  |
| RAF S289/S29 | 0.179  | 0.196 | 0.171  | 0.175 | 0.171  |
|              | 0.184  | 0.187 | 0.182  | 0.176 | 0.19   |
|              | 0.161  | 0.202 | 0.209  | 0.203 | 0.212  |
|              | 0.212  | 0.209 | 0.213  | 0.201 | 0.228  |
| MEK S217/S2  | 0.207  | 0.201 | 0.369  | 0.51  | 0.609  |
|              | 0.203  | 0.206 | 0.454  | 0.514 | 0.925  |
|              | 0.2173 | 0.215 | 0.541  | 0.715 | 1.037  |
|              | 0.242  | 0.229 | 0.623  | 0.749 | 1.301  |
| ERK T202/Y20 | 0.374  | 0.369 | 0.697  | 1.003 | 0.909  |
|              | 0.388  | 0.35  | 0.76   | 0.784 | 1.002  |
|              | 0.342  | 0.374 | 0.876  | 0.865 | 1.067  |
|              | 0.368  | 0.384 | 0.905  | 1.135 | 1.224  |
| p90RSK S380  | 0.342  | 0.289 | 0.358  | 0.317 | 0.555  |
|              | 0.43   | 0.244 | 0.307  | 0.252 | 0.514  |
|              | 0.403  | 0.291 | 0.327  | 0.333 | 0.408  |
|              | 0.32   | 0.317 | 0.3307 | 0.508 | 0.779  |
| STAT1 Y701   | 0.389  | 0.429 | 0.4377 | 0.404 | 0.41   |
|              | 0.46   | 0.442 | 0.427  | 0.447 | 0.479  |
|              | 0.359  | 0.45  | 0.417  | 0.452 | 0.459  |
|              | 0.432  | 0.421 | 0.469  | 0.458 | 0.484  |
| STAT3 Y705   | 0.621  | 0.653 | 0.567  | 0.571 | 0.555  |
|              | 0.674  | 0.668 | 0.641  | 0.587 | 0.634  |
|              | 0.624  | 0.718 | 0.708  | 0.718 | 0.696  |
|              | 0.719  | 0.707 | 0.723  | 0.734 | 0.739  |
| CREB S133    | 0.698  | 0.679 | 0.696  | 0.915 | 1.0927 |
|              | 0.82   | 0.75  | 0.928  | 1.006 | 1.099  |
|              | 0.59   | 0.78  | 0.984  | 1.177 | 1.064  |
|              | 0.831  | 0.674 | 0.961  | 1.101 | 1.115  |
| NF-kB S536   | 0.716  | 0.738 | 0.731  | 0.784 | 0.738  |
|              | 0.772  | 0.783 | 0.868  | 0.806 | 0.936  |
|              | 0.703  | 0.895 | 1.024  | 0.894 | 0.882  |
|              | 0.911  | 0.867 | 0.957  | 1.027 | 1.081  |
| c-Jun S63    | 0.044  | 0.063 | 0.038  | 0.049 | 0.039  |
|              | 0.052  | 0.053 | 0.051  | 0.047 | 0.057  |
|              | 0.028  | 0.064 | 0.057  | 0.062 | 0.066  |
|              | 0.077  | 0.069 | 0.076  | 0.062 | 0.078  |

|               | PLCG1 sh2 |       |       |       |       |
|---------------|-----------|-------|-------|-------|-------|
| PDGFRb Y771   | 0.277     | 0.279 | 0.283 | 0.286 | 0.279 |
|               | 0.266     | 0.281 | 0.284 | 0.283 | 0.287 |
|               | 0.313     | 0.311 | 0.3   | 0.311 | 0.31  |
|               | 0.324     | 0.315 | 0.322 | 0.329 | 0.32  |
| SHC Y317      | 0.406     | 0.455 | 0.516 | 0.531 | 0.543 |
|               | 0.381     | 0.508 | 0.487 | 0.523 | 0.541 |
|               | 0.433     | 0.482 | 0.507 | 0.543 | 0.554 |
|               | 0.455     | 0.484 | 0.539 | 0.576 | 0.567 |
| c-Cbl Y774    | 0.384     | 0.416 | 0.403 | 0.407 | 0.424 |
|               | 0.36      | 0.373 | 0.378 | 0.392 | 0.39  |
|               | 0.398     | 0.405 | 0.367 | 0.374 | 0.386 |
|               | 0.39      | 0.394 | 0.414 | 0.384 | 0.402 |
| Paxillin Y118 | 0.679     | 0.683 | 0.669 | 0.666 | 0.674 |
|               | 0.676     | 0.675 | 0.631 | 0.646 | 0.669 |
|               | 0.689     | 0.679 | 0.63  | 0.65  | 0.67  |
|               | 0.68      | 0.682 | 0.658 | 0.64  | 0.677 |
| AKT S473      | 0.578     | 0.567 | 0.651 | 0.593 | 0.706 |
|               | 0.513     | 0.515 | 0.573 | 0.699 | 0.65  |
|               | 0.571     | 0.555 | 0.546 | 0.487 | 0.582 |
|               | 0.527     | 0.518 | 0.553 | 0.499 | 0.595 |
| GSK-3a/b S21  | 0.575     | 0.565 | 0.626 | 0.635 | 0.683 |
|               | 0.5717    | 0.567 | 0.552 | 0.669 | 0.684 |
|               | 0.574     | 0.564 | 0.484 | 0.585 | 0.621 |
|               | 0.566     | 0.564 | 0.516 | 0.582 | 0.625 |
| RPS6 S235/S2  | 0.106     | 0.085 | 0.107 | 0.117 | 0.222 |
|               | 0.108     | 0.08  | 0.07  | 0.141 | 0.252 |
|               | 0.102     | 0.086 | 0.097 | 0.145 | 0.184 |
|               | 0.086     | 0.081 | 0.084 | 0.122 | 0.197 |
| RPS6 S240/S2  | 0.13      | 0.134 | 0.158 | 0.176 | 0.197 |
|               | 0.137     | 0.132 | 0.121 | 0.155 | 0.204 |
|               | 0.113     | 0.103 | 0.118 | 0.15  | 0.152 |
|               | 0.096     | 0.101 | 0.103 | 0.13  | 0.167 |
| PKCb S660     | 0.268     | 0.296 | 0.31  | 0.358 | 0.493 |
|               | 0.258     | 0.267 | 0.24  | 0.361 | 0.483 |
|               | 0.311     | 0.321 | 0.272 | 0.306 | 0.5   |
|               | 0.35      | 0.317 | 0.28  | 0.407 | 0.485 |
| PKCd S643     | 0.314     | 0.331 | 0.327 | 0.327 | 0.326 |
|               | 0.292     | 0.325 | 0.315 | 0.325 | 0.335 |

|              |        |        |        |       |       |
|--------------|--------|--------|--------|-------|-------|
|              | 0.385  | 0.353  | 0.325  | 0.353 | 0.336 |
|              | 0.432  | 0.385  | 0.355  | 0.335 | 0.355 |
| MARCKs S512, | 0.331  | 0.386  | 0.374  | 0.368 | 0.394 |
|              | 0.3373 | 0.35   | 0.323  | 0.363 | 0.356 |
|              | 0.352  | 0.351  | 0.3487 | 0.341 | 0.352 |
|              | 0.329  | 0.358  | 0.349  | 0.337 | 0.377 |
| CAMI S81     | 0.508  | 0.544  | 0.492  | 0.527 | 0.594 |
|              | 0.445  | 0.48   | 0.445  | 0.483 | 0.61  |
|              | 0.712  | 0.624  | 0.54   | 0.592 | 0.608 |
|              | 0.733  | 0.648  | 0.598  | 0.694 | 0.664 |
| RSK3 T356/S3 | 0.564  | 0.576  | 0.585  | 0.671 | 0.721 |
|              | 0.545  | 0.568  | 0.563  | 0.659 | 0.717 |
|              | 0.558  | 0.559  | 0.527  | 0.618 | 0.657 |
|              | 0.539  | 0.568  | 0.568  | 0.617 | 0.672 |
| RAF S289/S29 | 0.196  | 0.2    | 0.197  | 0.202 | 0.199 |
|              | 0.188  | 0.195  | 0.181  | 0.198 | 0.198 |
|              | 0.199  | 0.192  | 0.173  | 0.172 | 0.175 |
|              | 0.194  | 0.194  | 0.183  | 0.179 | 0.182 |
| MEK S217/S2  | 0.23   | 0.243  | 0.24   | 0.449 | 0.772 |
|              | 0.258  | 0.226  | 0.229  | 0.453 | 0.734 |
|              | 0.204  | 0.175  | 0.188  | 0.363 | 0.658 |
|              | 0.209  | 0.167  | 0.184  | 0.366 | 0.61  |
| ERK T202/Y20 | 0.36   | 0.374  | 0.458  | 0.811 | 0.839 |
|              | 0.358  | 0.363  | 0.431  | 0.809 | 1.076 |
|              | 0.352  | 0.356  | 0.409  | 0.68  | 0.929 |
|              | 0.354  | 0.357  | 0.416  | 0.698 | 0.975 |
| p90RSK S380  | 0.494  | 0.2805 | 0.2715 | 0.305 | 0.491 |
|              | 0.568  | 0.2805 | 0.2715 | 0.334 | 0.478 |
|              | 0.576  | 0.282  | 0.287  | 0.238 | 0.29  |
|              | 0.598  | 0.279  | 0.256  | 0.249 | 0.295 |
| STAT1 Y701   | 0.433  | 0.428  | 0.4    | 0.435 | 0.434 |
|              | 0.425  | 0.425  | 0.39   | 0.427 | 0.44  |
|              | 0.446  | 0.426  | 0.374  | 0.419 | 0.439 |
|              | 0.447  | 0.433  | 0.388  | 0.446 | 0.444 |
| STAT3 Y705   | 0.583  | 0.568  | 0.546  | 0.579 | 0.569 |
|              | 0.575  | 0.561  | 0.526  | 0.572 | 0.588 |
|              | 0.641  | 0.608  | 0.527  | 0.603 | 0.6   |
|              | 0.649  | 0.622  | 0.571  | 0.617 | 0.597 |
| CREB S133    | 0.508  | 0.554  | 0.514  | 0.575 | 0.718 |



|              |       |       |        |       |        |
|--------------|-------|-------|--------|-------|--------|
|              | 0.138 | 0.111 | 0.171  | 0.234 | 0.272  |
|              | 0.187 | 0.158 | 0.208  | 0.285 | 0.346  |
|              | 0.175 | 0.154 | 0.182  | 0.275 | 0.36   |
| RPS6 S240/S2 | 0.248 | 0.155 | 0.25   | 0.36  | 0.386  |
|              | 0.181 | 0.136 | 0.208  | 0.302 | 0.3907 |
|              | 0.25  | 0.227 | 0.279  | 0.399 | 0.384  |
|              | 0.247 | 0.249 | 0.308  | 0.373 | 0.402  |
| PKCb S660    | 0.314 | 0.303 | 0.3    | 0.356 | 0.451  |
|              | 0.336 | 0.32  | 0.274  | 0.358 | 0.491  |
|              | 0.304 | 0.292 | 0.288  | 0.331 | 0.47   |
|              | 0.318 | 0.308 | 0.272  | 0.319 | 0.476  |
| PKCd S643    | 0.35  | 0.361 | 0.376  | 0.372 | 0.374  |
|              | 0.348 | 0.335 | 0.319  | 0.329 | 0.337  |
|              | 0.349 | 0.352 | 0.358  | 0.349 | 0.344  |
|              | 0.356 | 0.35  | 0.33   | 0.343 | 0.34   |
| MARCKs S512, | 0.379 | 0.361 | 0.357  | 0.415 | 0.415  |
|              | 0.347 | 0.352 | 0.298  | 0.339 | 0.337  |
|              | 0.312 | 0.345 | 0.374  | 0.368 | 0.398  |
|              | 0.321 | 0.328 | 0.281  | 0.328 | 0.346  |
| CAMI S81     | 0.882 | 0.792 | 0.7    | 0.752 | 0.706  |
|              | 0.768 | 0.701 | 0.742  | 0.623 | 0.585  |
|              | 0.639 | 0.619 | 0.591  | 0.622 | 0.632  |
|              | 0.726 | 0.704 | 0.53   | 0.639 | 0.586  |
| RSK3 T356/S3 | 0.501 | 0.509 | 0.541  | 0.639 | 0.687  |
|              | 0.499 | 0.482 | 0.521  | 0.622 | 0.673  |
|              | 0.558 | 0.544 | 0.576  | 0.671 | 0.735  |
|              | 0.554 | 0.546 | 0.562  | 0.627 | 0.694  |
| RAF S289/S29 | 0.176 | 0.196 | 0.199  | 0.207 | 0.204  |
|              | 0.184 | 0.191 | 0.1933 | 0.194 | 0.183  |
|              | 0.193 | 0.201 | 0.192  | 0.205 | 0.204  |
|              | 0.189 | 0.194 | 0.189  | 0.191 | 0.19   |
| MEK S217/S2: | 0.15  | 0.163 | 0.185  | 0.413 | 0.594  |
|              | 0.156 | 0.168 | 0.193  | 0.406 | 0.529  |
|              | 0.188 | 0.199 | 0.204  | 0.41  | 0.593  |
|              | 0.203 | 0.197 | 0.197  | 0.379 | 0.698  |
| ERK T202/Y20 | 0.367 | 0.381 | 0.397  | 0.731 | 1.01   |
|              | 0.345 | 0.363 | 0.399  | 0.69  | 0.965  |
|              | 0.403 | 0.431 | 0.392  | 0.639 | 0.962  |
|              | 0.402 | 0.414 | 0.388  | 0.617 | 0.946  |

|                          |        |       |        |       |        |
|--------------------------|--------|-------|--------|-------|--------|
| p90RSK S380              | 0.161  | 0.239 | 0.267  | 0.219 | 0.294  |
|                          | 0.164  | 0.261 | 0.288  | 0.244 | 0.334  |
|                          | 0.459  | 0.278 | 0.295  | 0.266 | 0.329  |
|                          | 0.514  | 0.287 | 0.31   | 0.27  | 0.341  |
| STAT1 Y701               | 0.416  | 0.417 | 0.457  | 0.483 | 0.498  |
|                          | 0.403  | 0.426 | 0.437  | 0.478 | 0.504  |
|                          | 0.432  | 0.421 | 0.458  | 0.475 | 0.489  |
|                          | 0.413  | 0.422 | 0.458  | 0.471 | 0.5    |
| STAT3 Y705               | 0.618  | 0.614 | 0.598  | 0.581 | 0.588  |
|                          | 0.586  | 0.631 | 0.558  | 0.577 | 0.582  |
|                          | 0.609  | 0.599 | 0.588  | 0.571 | 0.576  |
|                          | 0.606  | 0.604 | 0.586  | 0.578 | 0.585  |
| CREB S133                | 0.494  | 0.524 | 0.494  | 0.571 | 0.761  |
|                          | 0.531  | 0.579 | 0.514  | 0.572 | 0.728  |
|                          | 0.545  | 0.568 | 0.544  | 0.593 | 0.775  |
|                          | 0.588  | 0.603 | 0.541  | 0.597 | 0.766  |
| NF-kB S536               | 0.576  | 0.645 | 0.618  | 0.668 | 0.647  |
|                          | 0.589  | 0.659 | 0.588  | 0.64  | 0.656  |
|                          | 0.6    | 0.64  | 0.605  | 0.669 | 0.68   |
|                          | 0.599  | 0.653 | 0.599  | 0.604 | 0.64   |
| c-Jun S63                | 0.04   | 0.053 | 0.047  | 0.062 | 0.066  |
|                          | 0.048  | 0.043 | 0.038  | 0.044 | 0.053  |
|                          | 0.052  | 0.057 | 0.047  | 0.057 | 0.064  |
|                          | 0.048  | 0.053 | 0.043  | 0.043 | 0.05   |
| PKC-A sh3<br>PDGFRb Y771 | 0.2793 | 0.299 | 0.2903 | 0.296 | 0.2983 |
|                          | 0.284  | 0.304 | 0.285  | 0.288 | 0.307  |
|                          | 0.275  | 0.299 | 0.289  | 0.297 | 0.293  |
|                          | 0.279  | 0.302 | 0.297  | 0.303 | 0.295  |
| SHC Y317                 | 0.351  | 0.456 | 0.417  | 0.473 | 0.434  |
|                          | 0.407  | 0.497 | 0.484  | 0.509 | 0.55   |
|                          | 0.402  | 0.467 | 0.485  | 0.539 | 0.504  |
|                          | 0.41   | 0.452 | 0.482  | 0.561 | 0.503  |
| c-Cbl Y774               | 0.346  | 0.377 | 0.349  | 0.353 | 0.323  |
|                          | 0.415  | 0.395 | 0.385  | 0.38  | 0.396  |
|                          | 0.377  | 0.359 | 0.37   | 0.363 | 0.343  |
|                          | 0.397  | 0.368 | 0.362  | 0.362 | 0.351  |

|               |        |       |        |       |        |
|---------------|--------|-------|--------|-------|--------|
| Paxillin Y118 | 0.585  | 0.671 | 0.658  | 0.611 | 0.583  |
|               | 0.742  | 0.739 | 0.673  | 0.663 | 0.732  |
|               | 0.638  | 0.674 | 0.631  | 0.662 | 0.632  |
|               | 0.72   | 0.671 | 0.67   | 0.674 | 0.645  |
| AKT S473      | 0.453  | 0.519 | 0.564  | 0.626 | 0.671  |
|               | 0.557  | 0.507 | 0.58   | 0.589 | 0.793  |
|               | 0.545  | 0.56  | 0.668  | 0.573 | 0.653  |
|               | 0.598  | 0.497 | 0.565  | 0.619 | 0.695  |
| GSK-3a/b S21  | 0.438  | 0.537 | 0.488  | 0.625 | 0.608  |
|               | 0.575  | 0.535 | 0.539  | 0.615 | 0.6063 |
|               | 0.578  | 0.588 | 0.596  | 0.564 | 0.599  |
|               | 0.499  | 0.497 | 0.51   | 0.592 | 0.612  |
| RPS6 S235/S2  | 0.093  | 0.105 | 0.105  | 0.145 | 0.176  |
|               | 0.121  | 0.11  | 0.112  | 0.124 | 0.251  |
|               | 0.133  | 0.132 | 0.118  | 0.137 | 0.25   |
|               | 0.129  | 0.119 | 0.137  | 0.161 | 0.265  |
| RPS6 S240/S2  | 0.1003 | 0.097 | 0.086  | 0.106 | 0.143  |
|               | 0.094  | 0.105 | 0.111  | 0.122 | 0.123  |
|               | 0.102  | 0.113 | 0.093  | 0.123 | 0.159  |
|               | 0.105  | 0.112 | 0.112  | 0.115 | 0.139  |
| PKCb S660     | 0.2827 | 0.26  | 0.195  | 0.293 | 0.298  |
|               | 0.276  | 0.261 | 0.274  | 0.339 | 0.477  |
|               | 0.28   | 0.297 | 0.277  | 0.39  | 0.507  |
|               | 0.292  | 0.299 | 0.285  | 0.427 | 0.553  |
| PKCd S643     | 0.6143 | 0.603 | 0.521  | 0.596 | 0.576  |
|               | 0.628  | 0.615 | 0.595  | 0.657 | 0.665  |
|               | 0.599  | 0.586 | 0.58   | 0.632 | 0.622  |
|               | 0.616  | 0.577 | 0.565  | 0.664 | 0.623  |
| MARCKs S512,  | 0.138  | 0.341 | 0.171  | 0.219 | 0.173  |
|               | 0.359  | 0.372 | 0.349  | 0.31  | 0.392  |
|               | 0.256  | 0.305 | 0.277  | 0.287 | 0.296  |
|               | 0.3    | 0.235 | 0.286  | 0.332 | 0.303  |
| CAMI S81      | 0.5417 | 0.521 | 0.4843 | 0.43  | 0.469  |
|               | 0.594  | 0.488 | 0.486  | 0.516 | 0.543  |
|               | 0.49   | 0.519 | 0.479  | 0.501 | 0.565  |
|               | 0.541  | 0.54  | 0.488  | 0.45  | 0.634  |
| RSK3 T356/S3  | 0.504  | 0.605 | 0.544  | 0.605 | 0.685  |
|               | 0.595  | 0.638 | 0.646  | 0.708 | 0.904  |
|               | 0.55   | 0.588 | 0.603  | 0.648 | 0.773  |
|               | 0.553  | 0.602 | 0.611  | 0.697 | 0.787  |

|              |        |        |        |       |        |
|--------------|--------|--------|--------|-------|--------|
| RAF S289/S29 | 0.151  | 0.207  | 0.153  | 0.162 | 0.176  |
|              | 0.199  | 0.213  | 0.182  | 0.177 | 0.225  |
|              | 0.173  | 0.191  | 0.175  | 0.161 | 0.188  |
|              | 0.181  | 0.191  | 0.175  | 0.17  | 0.195  |
| MEK S217/S2  | 0.139  | 0.174  | 0.206  | 0.423 | 0.577  |
|              | 0.183  | 0.192  | 0.294  | 0.587 | 0.7553 |
|              | 0.156  | 0.173  | 0.216  | 0.507 | 0.811  |
|              | 0.172  | 0.168  | 0.219  | 0.599 | 0.878  |
| ERK T202/Y20 | 0.3    | 0.343  | 0.419  | 0.737 | 0.915  |
|              | 0.353  | 0.384  | 0.519  | 0.748 | 1.154  |
|              | 0.317  | 0.329  | 0.412  | 0.683 | 0.952  |
|              | 0.327  | 0.328  | 0.413  | 0.763 | 0.992  |
| p90RSK S380  | 0.745  | 0.206  | 0.293  | 0.222 | 0.385  |
|              | 0.724  | 0.259  | 0.265  | 0.246 | 0.382  |
|              | 0.828  | 0.263  | 0.272  | 0.244 | 0.454  |
|              | 0.487  | 0.284  | 0.254  | 0.236 | 0.487  |
| STAT1 Y701   | 0.335  | 0.3933 | 0.351  | 0.385 | 0.39   |
|              | 0.391  | 0.398  | 0.378  | 0.426 | 0.471  |
|              | 0.369  | 0.382  | 0.377  | 0.415 | 0.442  |
|              | 0.374  | 0.4    | 0.388  | 0.433 | 0.445  |
| STAT3 Y705   | 0.5797 | 0.572  | 0.547  | 0.519 | 0.544  |
|              | 0.563  | 0.553  | 0.567  | 0.538 | 0.598  |
|              | 0.585  | 0.589  | 0.601  | 0.554 | 0.605  |
|              | 0.591  | 0.587  | 0.591  | 0.57  | 0.614  |
| CREB S133    | 0.5477 | 0.562  | 0.465  | 0.579 | 0.634  |
|              | 0.563  | 0.663  | 0.656  | 0.737 | 0.806  |
|              | 0.52   | 0.591  | 0.587  | 0.738 | 0.84   |
|              | 0.56   | 0.529  | 0.582  | 0.8   | 0.884  |
| NF-kB S536   | 0.6613 | 0.711  | 0.7027 | 0.679 | 0.72   |
|              | 0.676  | 0.726  | 0.731  | 0.713 | 0.791  |
|              | 0.657  | 0.713  | 0.694  | 0.73  | 0.774  |
|              | 0.651  | 0.692  | 0.683  | 0.749 | 0.798  |
| c-Jun S63    | 0.026  | 0.094  | 0.031  | 0.036 | 0.033  |
|              | 0.08   | 0.098  | 0.088  | 0.067 | 0.106  |
|              | 0.061  | 0.091  | 0.059  | 0.048 | 0.056  |
|              | 0.074  | 0.109  | 0.067  | 0.079 | 0.073  |

PKC-A sh8

|               |        |        |        |        |        |
|---------------|--------|--------|--------|--------|--------|
| PDGFRb Y771   | 0.282  | 0.305  | 0.261  | 0.274  | 0.3057 |
|               | 0.316  | 0.297  | 0.308  | 0.319  | 0.314  |
|               | 0.283  | 0.308  | 0.287  | 0.296  | 0.302  |
|               | 0.2937 | 0.304  | 0.286  | 0.316  | 0.301  |
| SHC Y317      | 0.422  | 0.484  | 0.459  | 0.461  | 0.5257 |
|               | 0.443  | 0.503  | 0.546  | 0.541  | 0.553  |
|               | 0.438  | 0.464  | 0.511  | 0.509  | 0.51   |
|               | 0.4343 | 0.476  | 0.515  | 0.52   | 0.514  |
| c-Cbl Y774    | 0.38   | 0.3877 | 0.3743 | 0.348  | 0.338  |
|               | 0.397  | 0.386  | 0.378  | 0.389  | 0.403  |
|               | 0.382  | 0.386  | 0.367  | 0.378  | 0.37   |
|               | 0.3863 | 0.391  | 0.378  | 0.401  | 0.381  |
| Paxillin Y118 | 0.617  | 0.727  | 0.678  | 0.6    | 0.542  |
|               | 0.714  | 0.712  | 0.674  | 0.705  | 0.699  |
|               | 0.708  | 0.704  | 0.671  | 0.662  | 0.607  |
|               | 0.6797 | 0.717  | 0.689  | 0.6557 | 0.67   |
| AKT S473      | 0.499  | 0.493  | 0.45   | 0.437  | 0.461  |
|               | 0.428  | 0.418  | 0.504  | 0.526  | 0.649  |
|               | 0.49   | 0.444  | 0.491  | 0.396  | 0.508  |
|               | 0.4723 | 0.437  | 0.426  | 0.436  | 0.582  |
| GSK-3a/b S21  | 0.51   | 0.51   | 0.412  | 0.429  | 0.431  |
|               | 0.565  | 0.469  | 0.471  | 0.557  | 0.576  |
|               | 0.549  | 0.488  | 0.482  | 0.544  | 0.49   |
|               | 0.5413 | 0.502  | 0.399  | 0.497  | 0.576  |
| RPS6 S235/S2  | 0.0853 | 0.063  | 0.11   | 0.142  | 0.19   |
|               | 0.076  | 0.064  | 0.073  | 0.114  | 0.236  |
|               | 0.082  | 0.071  | 0.072  | 0.132  | 0.208  |
|               | 0.098  | 0.073  | 0.092  | 0.129  | 0.238  |
| RPS6 S240/S2  | 0.115  | 0.055  | 0.102  | 0.142  | 0.174  |
|               | 0.066  | 0.053  | 0.066  | 0.099  | 0.142  |
|               | 0.075  | 0.06   | 0.064  | 0.114  | 0.128  |
|               | 0.107  | 0.06   | 0.086  | 0.112  | 0.139  |
| PKCb S660     | 0.263  | 0.279  | 0.256  | 0.235  | 0.215  |
|               | 0.301  | 0.277  | 0.273  | 0.353  | 0.508  |
|               | 0.304  | 0.29   | 0.285  | 0.345  | 0.444  |
|               | 0.2893 | 0.312  | 0.286  | 0.401  | 0.547  |
| PKCd S643     | 0.586  | 0.65   | 0.582  | 0.58   | 0.6487 |
|               | 0.602  | 0.639  | 0.668  | 0.662  | 0.667  |
|               | 0.59   | 0.674  | 0.624  | 0.645  | 0.632  |

|              |        |       |        |        |        |
|--------------|--------|-------|--------|--------|--------|
|              | 0.512  | 0.679 | 0.658  | 0.657  | 0.647  |
| MARCKs S512, | 0.253  | 0.355 | 0.3147 | 0.3173 | 0.3433 |
|              | 0.368  | 0.345 | 0.351  | 0.318  | 0.392  |
|              | 0.323  | 0.306 | 0.278  | 0.288  | 0.299  |
|              | 0.3147 | 0.313 | 0.315  | 0.346  | 0.339  |
| CAMI S81     | 0.52   | 0.543 | 0.54   | 0.494  | 0.534  |
|              | 0.52   | 0.49  | 0.566  | 0.509  | 0.629  |
|              | 0.468  | 0.481 | 0.599  | 0.441  | 0.613  |
|              | 0.5027 | 0.473 | 0.468  | 0.493  | 0.629  |
| RSK3 T356/S3 | 0.542  | 0.556 | 0.515  | 0.543  | 0.579  |
|              | 0.562  | 0.549 | 0.55   | 0.612  | 0.744  |
|              | 0.583  | 0.564 | 0.525  | 0.597  | 0.688  |
|              | 0.5623 | 0.552 | 0.543  | 0.623  | 0.72   |
| RAF S289/S29 | 0.172  | 0.214 | 0.151  | 0.158  | 0.164  |
|              | 0.186  | 0.193 | 0.179  | 0.185  | 0.213  |
|              | 0.181  | 0.19  | 0.175  | 0.17   | 0.19   |
|              | 0.1797 | 0.196 | 0.181  | 0.188  | 0.193  |
| MEK S217/S2  | 0.16   | 0.175 | 0.181  | 0.364  | 0.479  |
|              | 0.189  | 0.176 | 0.234  | 0.402  | 0.989  |
|              | 0.165  | 0.17  | 0.205  | 0.389  | 0.701  |
|              | 0.155  | 0.167 | 0.222  | 0.458  | 0.837  |
| ERK T202/Y20 | 0.326  | 0.379 | 0.369  | 0.576  | 0.669  |
|              | 0.349  | 0.355 | 0.421  | 0.718  | 1.008  |
|              | 0.336  | 0.349 | 0.379  | 0.678  | 0.757  |
|              | 0.337  | 0.341 | 0.409  | 0.634  | 0.889  |
| p90RSK S380  | 0.608  | 0.22  | 0.287  | 0.227  | 0.331  |
|              | 0.566  | 0.268 | 0.233  | 0.236  | 0.329  |
|              | 0.735  | 0.277 | 0.251  | 0.249  | 0.396  |
|              | 0.77   | 0.183 | 0.265  | 0.24   | 0.436  |
| STAT1 Y701   | 0.371  | 0.404 | 0.36   | 0.38   | 0.341  |
|              | 0.401  | 0.416 | 0.41   | 0.38   | 0.44   |
|              | 0.375  | 0.392 | 0.38   | 0.399  | 0.395  |
|              | 0.32   | 0.42  | 0.407  | 0.409  | 0.411  |
| STAT3 Y705   | 0.547  | 0.603 | 0.569  | 0.544  | 0.531  |
|              | 0.558  | 0.617 | 0.586  | 0.557  | 0.565  |
|              | 0.566  | 0.621 | 0.599  | 0.568  | 0.567  |
|              | 0.493  | 0.63  | 0.602  | 0.575  | 0.578  |
| CREB S133    | 0.517  | 0.627 | 0.551  | 0.573  | 0.596  |
|              | 0.61   | 0.663 | 0.694  | 0.711  | 0.795  |

|               |           |       |       |       |       |
|---------------|-----------|-------|-------|-------|-------|
|               | 0.563     | 0.587 | 0.589 | 0.689 | 0.83  |
|               | 0.5633    | 0.587 | 0.612 | 0.756 | 0.883 |
| NF-kB S536    | 0.599     | 0.637 | 0.623 | 0.644 | 0.62  |
|               | 0.621     | 0.618 | 0.642 | 0.682 | 0.722 |
|               | 0.623     | 0.633 | 0.646 | 0.681 | 0.696 |
|               | 0.6143    | 0.625 | 0.645 | 0.732 | 0.753 |
| c-Jun S63     | 0.029     | 0.056 | 0.036 | 0.036 | 0.035 |
|               | 0.05      | 0.065 | 0.05  | 0.049 | 0.085 |
|               | 0.045     | 0.046 | 0.041 | 0.05  | 0.047 |
|               | 0.02      | 0.056 | 0.047 | 0.054 | 0.056 |
|               | PKC-B sh2 |       |       |       |       |
| PDGFRb Y771   | 0.295     | 0.302 | 0.313 | 0.295 | 0.291 |
|               | 0.282     | 0.301 | 0.317 | 0.291 | 0.287 |
|               | 0.278     | 0.292 | 0.28  | 0.296 | 0.281 |
|               | 0.295     | 0.293 | 0.304 | 0.297 | 0.293 |
| SHC Y317      | 0.419     | 0.49  | 0.51  | 0.522 | 0.52  |
|               | 0.4       | 0.489 | 0.504 | 0.5   | 0.511 |
|               | 0.398     | 0.49  | 0.469 | 0.521 | 0.511 |
|               | 0.426     | 0.49  | 0.492 | 0.518 | 0.518 |
| c-Cbl Y774    | 0.412     | 0.412 | 0.427 | 0.403 | 0.384 |
|               | 0.401     | 0.405 | 0.425 | 0.376 | 0.374 |
|               | 0.397     | 0.397 | 0.383 | 0.386 | 0.363 |
|               | 0.396     | 0.396 | 0.399 | 0.386 | 0.376 |
| Paxillin Y118 | 0.675     | 0.681 | 0.675 | 0.665 | 0.676 |
|               | 0.671     | 0.68  | 0.658 | 0.629 | 0.663 |
|               | 0.67      | 0.678 | 0.624 | 0.665 | 0.652 |
|               | 0.668     | 0.684 | 0.636 | 0.656 | 0.685 |
| AKT S473      | 0.496     | 0.476 | 0.559 | 0.567 | 0.616 |
|               | 0.477     | 0.469 | 0.55  | 0.532 | 0.679 |
|               | 0.484     | 0.479 | 0.47  | 0.539 | 0.545 |
|               | 0.462     | 0.489 | 0.481 | 0.527 | 0.542 |
| GSK-3a/b S21  | 0.517     | 0.469 | 0.546 | 0.535 | 0.598 |
|               | 0.467     | 0.518 | 0.542 | 0.49  | 0.539 |
|               | 0.451     | 0.494 | 0.442 | 0.532 | 0.561 |
|               | 0.495     | 0.541 | 0.478 | 0.518 | 0.566 |
| RPS6 S235/S2  | 0.084     | 0.059 | 0.07  | 0.1   | 0.19  |
|               | 0.066     | 0.058 | 0.063 | 0.094 | 0.202 |

|              |       |       |        |       |       |
|--------------|-------|-------|--------|-------|-------|
|              | 0.081 | 0.067 | 0.072  | 0.105 | 0.166 |
|              | 0.074 | 0.071 | 0.072  | 0.112 | 0.185 |
| RPS6 S240/S2 | 0.102 | 0.074 | 0.095  | 0.114 | 0.13  |
|              | 0.079 | 0.076 | 0.089  | 0.106 | 0.163 |
|              | 0.098 | 0.077 | 0.102  | 0.127 | 0.122 |
|              | 0.08  | 0.08  | 0.096  | 0.119 | 0.143 |
| PKCb S660    | 0.287 | 0.297 | 0.32   | 0.373 | 0.56  |
|              | 0.278 | 0.293 | 0.301  | 0.381 | 0.476 |
|              | 0.293 | 0.285 | 0.259  | 0.336 | 0.468 |
|              | 0.286 | 0.293 | 0.268  | 0.352 | 0.454 |
| PKCd S643    | 0.727 | 0.675 | 0.628  | 0.666 | 0.631 |
|              | 0.705 | 0.682 | 0.622  | 0.652 | 0.623 |
|              | 0.682 | 0.645 | 0.616  | 0.648 | 0.606 |
|              | 0.697 | 0.658 | 0.598  | 0.652 | 0.625 |
| MARCKs S512, | 0.396 | 0.383 | 0.421  | 0.385 | 0.373 |
|              | 0.353 | 0.367 | 0.395  | 0.32  | 0.303 |
|              | 0.317 | 0.334 | 0.289  | 0.349 | 0.369 |
|              | 0.337 | 0.359 | 0.326  | 0.341 | 0.344 |
| CAMI S81     | 0.602 | 0.598 | 0.608  | 0.546 | 0.568 |
|              | 0.544 | 0.583 | 0.568  | 0.469 | 0.531 |
|              | 0.529 | 0.56  | 0.49   | 0.485 | 0.493 |
|              | 0.525 | 0.549 | 0.51   | 0.502 | 0.51  |
| RSK3 T356/S3 | 0.598 | 0.574 | 0.592  | 0.629 | 0.696 |
|              | 0.572 | 0.563 | 0.568  | 0.597 | 0.659 |
|              | 0.598 | 0.574 | 0.5687 | 0.602 | 0.651 |
|              | 0.58  | 0.566 | 0.546  | 0.598 | 0.658 |
| RAF S289/S29 | 0.212 | 0.197 | 0.193  | 0.201 | 0.203 |
|              | 0.203 | 0.195 | 0.185  | 0.191 | 0.203 |
|              | 0.195 | 0.183 | 0.159  | 0.172 | 0.179 |
|              | 0.193 | 0.181 | 0.163  | 0.178 | 0.187 |
| MEK S217/S2  | 0.191 | 0.183 | 0.244  | 0.505 | 0.754 |
|              | 0.207 | 0.178 | 0.249  | 0.479 | 0.626 |
|              | 0.172 | 0.173 | 0.203  | 0.494 | 0.742 |
|              | 0.188 | 0.177 | 0.21   | 0.477 | 0.654 |
| ERK T202/Y20 | 0.395 | 0.364 | 0.474  | 0.828 | 1.175 |
|              | 0.391 | 0.357 | 0.47   | 0.79  | 1.077 |
|              | 0.397 | 0.362 | 0.443  | 0.79  | 1.067 |
|              | 0.379 | 0.358 | 0.434  | 0.783 | 1.104 |
| p90RSK S380  | 0.637 | 0.475 | 0.273  | 0.269 | 0.36  |

|               |           |       |        |       |       |
|---------------|-----------|-------|--------|-------|-------|
|               | 0.728     | 0.329 | 0.267  | 0.259 | 0.358 |
|               | 0.478     | 0.242 | 0.282  | 0.249 | 0.344 |
|               | 0.526     | 0.253 | 0.29   | 0.246 | 0.348 |
| STAT1 Y701    | 0.423     | 0.411 | 0.412  | 0.414 | 0.408 |
|               | 0.411     | 0.414 | 0.416  | 0.406 | 0.398 |
|               | 0.394     | 0.388 | 0.375  | 0.405 | 0.394 |
|               | 0.402     | 0.399 | 0.394  | 0.412 | 0.421 |
| STAT3 Y705    | 0.545     | 0.584 | 0.582  | 0.571 | 0.576 |
|               | 0.531     | 0.593 | 0.569  | 0.567 | 0.56  |
|               | 0.522     | 0.561 | 0.548  | 0.55  | 0.561 |
|               | 0.523     | 0.575 | 0.555  | 0.558 | 0.562 |
| CREB S133     | 0.56      | 0.56  | 0.643  | 0.691 | 0.813 |
|               | 0.596     | 0.577 | 0.65   | 0.63  | 0.747 |
|               | 0.509     | 0.496 | 0.531  | 0.634 | 0.744 |
|               | 0.559     | 0.541 | 0.575  | 0.67  | 0.777 |
| NF-kB S536    | 0.615     | 0.635 | 0.636  | 0.655 | 0.679 |
|               | 0.613     | 0.627 | 0.624  | 0.631 | 0.645 |
|               | 0.612     | 0.622 | 0.602  | 0.674 | 0.68  |
|               | 0.6133    | 0.622 | 0.605  | 0.634 | 0.68  |
| c-Jun S63     | 0.044     | 0.041 | 0.042  | 0.041 | 0.049 |
|               | 0.033     | 0.043 | 0.04   | 0.041 | 0.04  |
|               | 0.041     | 0.048 | 0.0413 | 0.042 | 0.045 |
|               | 0.04      | 0.044 | 0.042  | 0.041 | 0.051 |
|               | PKC-B sh5 |       |        |       |       |
| PDGFRb Y771   | 0.321     | 0.299 | 0.303  | 0.302 | 0.303 |
|               | 0.328     | 0.296 | 0.295  | 0.28  | 0.276 |
|               | 0.333     | 0.31  | 0.299  | 0.304 | 0.296 |
|               | 0.325     | 0.306 | 0.299  | 0.288 | 0.291 |
| SHC Y317      | 0.514     | 0.483 | 0.493  | 0.54  | 0.582 |
|               | 0.478     | 0.482 | 0.516  | 0.506 | 0.513 |
|               | 0.492     | 0.504 | 0.516  | 0.522 | 0.535 |
|               | 0.471     | 0.491 | 0.491  | 0.493 | 0.534 |
| c-Cbl Y774    | 0.292     | 0.332 | 0.353  | 0.356 | 0.378 |
|               | 0.303     | 0.344 | 0.357  | 0.333 | 0.333 |
|               | 0.427     | 0.45  | 0.428  | 0.419 | 0.427 |
|               | 0.391     | 0.428 | 0.385  | 0.354 | 0.419 |
| Paxillin Y118 | 0.61      | 0.614 | 0.612  | 0.608 | 0.624 |

|              |        |       |       |       |       |
|--------------|--------|-------|-------|-------|-------|
|              | 0.625  | 0.582 | 0.598 | 0.533 | 0.536 |
|              | 0.713  | 0.699 | 0.676 | 0.673 | 0.691 |
|              | 0.699  | 0.68  | 0.667 | 0.643 | 0.661 |
| AKT S473     | 0.496  | 0.451 | 0.531 | 0.476 | 0.575 |
|              | 0.448  | 0.405 | 0.499 | 0.546 | 0.638 |
|              | 0.566  | 0.533 | 0.581 | 0.51  | 0.607 |
|              | 0.512  | 0.485 | 0.561 | 0.607 | 0.752 |
| GSK-3a/b S21 | 0.46   | 0.477 | 0.509 | 0.551 | 0.619 |
|              | 0.472  | 0.461 | 0.486 | 0.514 | 0.557 |
|              | 0.614  | 0.613 | 0.623 | 0.667 | 0.683 |
|              | 0.521  | 0.527 | 0.603 | 0.6   | 0.679 |
| RPS6 S235/S2 | 0.086  | 0.082 | 0.112 | 0.117 | 0.218 |
|              | 0.102  | 0.078 | 0.09  | 0.138 | 0.188 |
|              | 0.136  | 0.107 | 0.137 | 0.16  | 0.224 |
|              | 0.124  | 0.108 | 0.129 | 0.15  | 0.263 |
| RPS6 S240/S2 | 0.105  | 0.092 | 0.145 | 0.165 | 0.195 |
|              | 0.103  | 0.091 | 0.124 | 0.151 | 0.195 |
|              | 0.179  | 0.165 | 0.194 | 0.202 | 0.207 |
|              | 0.161  | 0.158 | 0.174 | 0.186 | 0.204 |
| PKCb S660    | 0.2973 | 0.294 | 0.3   | 0.376 | 0.488 |
|              | 0.288  | 0.282 | 0.281 | 0.375 | 0.409 |
|              | 0.309  | 0.303 | 0.29  | 0.348 | 0.467 |
|              | 0.295  | 0.296 | 0.28  | 0.354 | 0.472 |
| PKCd S643    | 0.777  | 0.763 | 0.697 | 0.717 | 0.717 |
|              | 0.739  | 0.73  | 0.693 | 0.69  | 0.651 |
|              | 0.739  | 0.72  | 0.689 | 0.722 | 0.685 |
|              | 0.701  | 0.707 | 0.663 | 0.675 | 0.68  |
| MARCKs S512, | 0.331  | 0.379 | 0.376 | 0.424 | 0.365 |
|              | 0.332  | 0.334 | 0.335 | 0.271 | 0.231 |
|              | 0.376  | 0.392 | 0.373 | 0.368 | 0.347 |
|              | 0.298  | 0.321 | 0.325 | 0.253 | 0.3   |
| CAMI S81     | 0.939  | 0.738 | 0.66  | 0.73  | 0.751 |
|              | 0.955  | 0.743 | 0.73  | 0.581 | 0.64  |
|              | 0.652  | 0.558 | 0.622 | 0.591 | 0.621 |
|              | 0.704  | 0.591 | 0.559 | 0.477 | 0.575 |
| RSK3 T356/S3 | 0.503  | 0.533 | 0.547 | 0.619 | 0.658 |
|              | 0.504  | 0.512 | 0.53  | 0.576 | 0.599 |
|              | 0.603  | 0.61  | 0.605 | 0.68  | 0.734 |
|              | 0.581  | 0.6   | 0.583 | 0.643 | 0.708 |

|              |       |       |       |       |       |
|--------------|-------|-------|-------|-------|-------|
| RAF S289/S29 | 0.171 | 0.189 | 0.203 | 0.196 | 0.193 |
|              | 0.177 | 0.186 | 0.197 | 0.169 | 0.173 |
|              | 0.199 | 0.208 | 0.209 | 0.202 | 0.213 |
|              | 0.191 | 0.203 | 0.198 | 0.185 | 0.202 |
| MEK S217/S2  | 0.149 | 0.176 | 0.234 | 0.475 | 0.687 |
|              | 0.163 | 0.177 | 0.24  | 0.436 | 0.525 |
|              | 0.214 | 0.206 | 0.251 | 0.479 | 0.713 |
|              | 0.221 | 0.182 | 0.234 | 0.46  | 0.668 |
| ERK T202/Y20 | 0.366 | 0.377 | 0.465 | 0.831 | 0.761 |
|              | 0.386 | 0.358 | 0.452 | 0.794 | 0.846 |
|              | 0.392 | 0.395 | 0.503 | 0.874 | 1.04  |
|              | 0.38  | 0.386 | 0.478 | 0.87  | 1.064 |
| p90RSK S380  | 0.18  | 0.287 | 0.28  | 0.283 | 0.383 |
|              | 0.184 | 0.299 | 0.284 | 0.311 | 0.42  |
|              | 0.471 | 0.318 | 0.325 | 0.323 | 0.442 |
|              | 0.542 | 0.333 | 0.315 | 0.341 | 0.46  |
| STAT1 Y701   | 0.45  | 0.441 | 0.439 | 0.483 | 0.474 |
|              | 0.464 | 0.442 | 0.442 | 0.441 | 0.438 |
|              | 0.44  | 0.428 | 0.424 | 0.369 | 0.422 |
|              | 0.436 | 0.437 | 0.391 | 0.4   | 0.431 |
| STAT3 Y705   | 0.629 | 0.587 | 0.587 | 0.548 | 0.597 |
|              | 0.602 | 0.591 | 0.571 | 0.52  | 0.545 |
|              | 0.61  | 0.588 | 0.598 | 0.559 | 0.572 |
|              | 0.609 | 0.591 | 0.58  | 0.538 | 0.581 |
| CREB S133    | 0.502 | 0.546 | 0.582 | 0.71  | 0.786 |
|              | 0.51  | 0.552 | 0.605 | 0.66  | 0.678 |
|              | 0.49  | 0.501 | 0.577 | 0.69  | 0.739 |
|              | 0.5   | 0.54  | 0.567 | 0.654 | 0.721 |
| NF-kB S536   | 0.571 | 0.585 | 0.641 | 0.691 | 0.7   |
|              | 0.574 | 0.543 | 0.596 | 0.631 | 0.627 |
|              | 0.613 | 0.613 | 0.662 | 0.697 | 0.701 |
|              | 0.605 | 0.609 | 0.644 | 0.696 | 0.728 |
| c-Jun S63    | 0.043 | 0.042 | 0.043 | 0.039 | 0.042 |
|              | 0.039 | 0.042 | 0.043 | 0.031 | 0.032 |
|              | 0.043 | 0.042 | 0.043 | 0.042 | 0.044 |
|              | 0.044 | 0.042 | 0.042 | 0.035 | 0.036 |

PKC-D sh06

|               |       |        |       |       |        |
|---------------|-------|--------|-------|-------|--------|
| PDGFRb Y771   | 0.277 | 0.269  | 0.245 | 0.268 | 0.271  |
|               | 0.258 | 0.278  | 0.251 | 0.27  | 0.259  |
|               | 0.288 | 0.278  | 0.25  | 0.26  | 0.252  |
|               | 0.285 | 0.282  | 0.253 | 0.268 | 0.261  |
| SHC Y317      | 0.374 | 0.421  | 0.433 | 0.422 | 0.455  |
|               | 0.345 | 0.438  | 0.443 | 0.445 | 0.446  |
|               | 0.41  | 0.456  | 0.464 | 0.417 | 0.474  |
|               | 0.397 | 0.465  | 0.468 | 0.461 | 0.498  |
| c-Cbl Y774    | 0.381 | 0.392  | 0.372 | 0.369 | 0.362  |
|               | 0.387 | 0.391  | 0.38  | 0.38  | 0.366  |
|               | 0.389 | 0.3915 | 0.381 | 0.364 | 0.357  |
|               | 0.391 | 0.3915 | 0.392 | 0.372 | 0.369  |
| Paxillin Y118 | 0.713 | 0.662  | 0.655 | 0.585 | 0.644  |
|               | 0.596 | 0.666  | 0.689 | 0.684 | 0.641  |
|               | 0.708 | 0.715  | 0.674 | 0.6   | 0.591  |
|               | 0.741 | 0.725  | 0.687 | 0.67  | 0.601  |
| AKT S473      | 0.423 | 0.503  | 0.465 | 0.52  | 0.654  |
|               | 0.393 | 0.483  | 0.494 | 0.558 | 0.616  |
|               | 0.524 | 0.548  | 0.57  | 0.508 | 0.622  |
|               | 0.508 | 0.527  | 0.475 | 0.486 | 0.595  |
| GSK-3a/b S21  | 0.466 | 0.471  | 0.487 | 0.533 | 0.452  |
|               | 0.471 | 0.454  | 0.499 | 0.458 | 0.437  |
|               | 0.481 | 0.471  | 0.47  | 0.523 | 0.533  |
|               | 0.466 | 0.488  | 0.491 | 0.528 | 0.441  |
| RPS6 S235/S2  | 0.094 | 0.068  | 0.09  | 0.129 | 0.237  |
|               | 0.09  | 0.077  | 0.085 | 0.138 | 0.222  |
|               | 0.108 | 0.083  | 0.097 | 0.14  | 0.199  |
|               | 0.104 | 0.101  | 0.099 | 0.137 | 0.221  |
| RPS6 S240/S2  | 0.076 | 0.057  | 0.079 | 0.101 | 0.121  |
|               | 0.078 | 0.061  | 0.075 | 0.106 | 0.138  |
|               | 0.091 | 0.068  | 0.089 | 0.115 | 0.135  |
|               | 0.093 | 0.09   | 0.093 | 0.118 | 0.159  |
| PKCb S660     | 0.513 | 0.498  | 0.499 | 0.655 | 0.861  |
|               | 0.48  | 0.492  | 0.501 | 0.72  | 0.893  |
|               | 0.535 | 0.493  | 0.484 | 0.671 | 0.883  |
|               | 0.535 | 0.521  | 0.502 | 0.654 | 0.885  |
| PKCd S643     | 0.289 | 0.291  | 0.281 | 0.278 | 0.289  |
|               | 0.293 | 0.29   | 0.289 | 0.295 | 0.283  |
|               | 0.298 | 0.289  | 0.293 | 0.288 | 0.287  |
|               | 0.292 | 0.29   | 0.288 | 0.298 | 0.2863 |

|              |        |       |       |       |       |
|--------------|--------|-------|-------|-------|-------|
| MARCKs S512, | 0.339  | 0.339 | 0.324 | 0.32  | 0.334 |
|              | 0.3337 | 0.361 | 0.394 | 0.367 | 0.315 |
|              | 0.342  | 0.346 | 0.293 | 0.298 | 0.326 |
|              | 0.32   | 0.363 | 0.355 | 0.33  | 0.314 |
| CAMI S81     | 0.512  | 0.458 | 0.437 | 0.442 | 0.448 |
|              | 0.399  | 0.455 | 0.471 | 0.489 | 0.457 |
|              | 0.513  | 0.453 | 0.435 | 0.43  | 0.449 |
|              | 0.502  | 0.485 | 0.481 | 0.478 | 0.478 |
| RSK3 T356/S3 | 0.575  | 0.568 | 0.56  | 0.565 | 0.645 |
|              | 0.579  | 0.577 | 0.571 | 0.594 | 0.642 |
|              | 0.582  | 0.58  | 0.562 | 0.564 | 0.639 |
|              | 0.58   | 0.595 | 0.571 | 0.585 | 0.63  |
| RAF S289/S29 | 0.182  | 0.178 | 0.179 | 0.185 | 0.188 |
|              | 0.181  | 0.185 | 0.186 | 0.195 | 0.182 |
|              | 0.179  | 0.181 | 0.179 | 0.174 | 0.18  |
|              | 0.182  | 0.178 | 0.182 | 0.195 | 0.182 |
| MEK S217/S2  | 0.172  | 0.184 | 0.272 | 0.511 | 0.913 |
|              | 0.168  | 0.194 | 0.301 | 0.602 | 0.873 |
|              | 0.174  | 0.186 | 0.236 | 0.462 | 0.819 |
|              | 0.191  | 0.199 | 0.255 | 0.494 | 0.844 |
| ERK T202/Y20 | 0.359  | 0.348 | 0.472 | 0.812 | 0.849 |
|              | 0.354  | 0.345 | 0.509 | 0.934 | 0.856 |
|              | 0.363  | 0.368 | 0.431 | 0.785 | 0.988 |
|              | 0.34   | 0.36  | 0.454 | 0.818 | 0.819 |
| p90RSK S380  | 0.483  | 0.232 | 0.215 | 0.227 | 0.35  |
|              | 0.589  | 0.186 | 0.204 | 0.239 | 0.402 |
|              | 0.498  | 0.234 | 0.252 | 0.237 | 0.355 |
|              | 0.51   | 0.225 | 0.233 | 0.222 | 0.371 |
| STAT1 Y701   | 0.33   | 0.351 | 0.351 | 0.369 | 0.395 |
|              | 0.324  | 0.351 | 0.357 | 0.382 | 0.391 |
|              | 0.346  | 0.363 | 0.362 | 0.385 | 0.404 |
|              | 0.344  | 0.365 | 0.371 | 0.388 | 0.411 |
| STAT3 Y705   | 0.498  | 0.534 | 0.504 | 0.481 | 0.531 |
|              | 0.489  | 0.535 | 0.509 | 0.488 | 0.518 |
|              | 0.52   | 0.541 | 0.524 | 0.498 | 0.54  |
|              | 0.521  | 0.559 | 0.527 | 0.494 | 0.533 |
| CREB S133    | 0.498  | 0.456 | 0.473 | 0.552 | 0.646 |
|              | 0.409  | 0.493 | 0.546 | 0.64  | 0.649 |
|              | 0.467  | 0.46  | 0.471 | 0.58  | 0.684 |



|              |        |       |       |       |       |
|--------------|--------|-------|-------|-------|-------|
|              | 0.123  | 0.092 | 0.1   | 0.146 | 0.225 |
| RPS6 S240/S2 | 0.077  | 0.052 | 0.069 | 0.104 | 0.13  |
|              | 0.069  | 0.05  | 0.059 | 0.101 | 0.124 |
|              | 0.099  | 0.078 | 0.08  | 0.122 | 0.161 |
|              | 0.102  | 0.08  | 0.081 | 0.116 | 0.156 |
| PKCb S660    | 0.598  | 0.614 | 0.617 | 0.819 | 1.072 |
|              | 0.637  | 0.625 | 0.597 | 0.851 | 1.068 |
|              | 0.588  | 0.573 | 0.533 | 0.717 | 0.921 |
|              | 0.588  | 0.578 | 0.543 | 0.736 | 0.963 |
| PKCd S643    | 0.352  | 0.362 | 0.356 | 0.344 | 0.357 |
|              | 0.359  | 0.346 | 0.359 | 0.355 | 0.35  |
|              | 0.301  | 0.307 | 0.302 | 0.299 | 0.29  |
|              | 0.306  | 0.307 | 0.301 | 0.307 | 0.302 |
| MARCKs S512, | 0.356  | 0.367 | 0.387 | 0.342 | 0.366 |
|              | 0.335  | 0.367 | 0.391 | 0.355 | 0.34  |
|              | 0.343  | 0.356 | 0.329 | 0.342 | 0.328 |
|              | 0.358  | 0.363 | 0.343 | 0.372 | 0.348 |
| CAMI S81     | 0.632  | 0.551 | 0.564 | 0.557 | 0.632 |
|              | 0.633  | 0.565 | 0.57  | 0.576 | 0.595 |
|              | 0.551  | 0.49  | 0.492 | 0.516 | 0.521 |
|              | 0.551  | 0.508 | 0.491 | 0.524 | 0.521 |
| RSK3 T356/S3 | 0.555  | 0.543 | 0.548 | 0.58  | 0.671 |
|              | 0.571  | 0.545 | 0.545 | 0.608 | 0.654 |
|              | 0.57   | 0.551 | 0.539 | 0.606 | 0.625 |
|              | 0.572  | 0.543 | 0.534 | 0.647 | 0.643 |
| RAF S289/S29 | 0.181  | 0.177 | 0.191 | 0.187 | 0.203 |
|              | 0.192  | 0.181 | 0.193 | 0.187 | 0.198 |
|              | 0.207  | 0.195 | 0.201 | 0.178 | 0.181 |
|              | 0.206  | 0.195 | 0.194 | 0.186 | 0.19  |
| MEK S217/S2  | 0.17   | 0.174 | 0.272 | 0.472 | 0.801 |
|              | 0.18   | 0.172 | 0.274 | 0.542 | 0.786 |
|              | 0.174  | 0.182 | 0.245 | 0.476 | 0.775 |
|              | 0.1747 | 0.184 | 0.234 | 0.499 | 0.806 |
| ERK T202/Y20 | 0.424  | 0.37  | 0.5   | 0.866 | 0.89  |
|              | 0.392  | 0.366 | 0.506 | 0.972 | 0.943 |
|              | 0.438  | 0.366 | 0.477 | 0.942 | 1.116 |
|              | 0.398  | 0.371 | 0.457 | 0.993 | 0.918 |
| p90RSK S380  | 0.531  | 0.24  | 0.229 | 0.237 | 0.398 |
|              | 0.565  | 0.246 | 0.234 | 0.238 | 0.403 |

|               |           |       |       |       |       |
|---------------|-----------|-------|-------|-------|-------|
|               | 0.555     | 0.249 | 0.259 | 0.223 | 0.377 |
|               | 0.567     | 0.257 | 0.25  | 0.208 | 0.405 |
| STAT1 Y701    | 0.397     | 0.389 | 0.413 | 0.416 | 0.438 |
|               | 0.405     | 0.386 | 0.416 | 0.425 | 0.451 |
|               | 0.376     | 0.356 | 0.396 | 0.401 | 0.414 |
|               | 0.377     | 0.381 | 0.403 | 0.407 | 0.424 |
| STAT3 Y705    | 0.553     | 0.598 | 0.597 | 0.564 | 0.601 |
|               | 0.568     | 0.591 | 0.608 | 0.59  | 0.598 |
|               | 0.537     | 0.559 | 0.564 | 0.561 | 0.529 |
|               | 0.523     | 0.554 | 0.567 | 0.562 | 0.573 |
| CREB S133     | 0.643     | 0.611 | 0.688 | 0.78  | 0.845 |
|               | 0.649     | 0.649 | 0.734 | 0.835 | 0.82  |
|               | 0.564     | 0.507 | 0.586 | 0.69  | 0.694 |
|               | 0.568     | 0.532 | 0.552 | 0.729 | 0.741 |
| NF-kB S536    | 0.625     | 0.634 | 0.65  | 0.701 | 0.765 |
|               | 0.621     | 0.648 | 0.669 | 0.725 | 0.73  |
|               | 0.632     | 0.663 | 0.664 | 0.722 | 0.77  |
|               | 0.646     | 0.664 | 0.639 | 0.723 | 0.79  |
| c-Jun S63     | 0.046     | 0.057 | 0.046 | 0.055 | 0.052 |
|               | 0.052     | 0.046 | 0.054 | 0.058 | 0.051 |
|               | 0.064     | 0.068 | 0.061 | 0.073 | 0.074 |
|               | 0.065     | 0.066 | 0.065 | 0.073 | 0.078 |
|               | PKC-E sh1 |       |       |       |       |
| PDGFRb Y771   | 0.271     | 0.283 | 0.257 | 0.286 | 0.274 |
|               | 0.295     | 0.286 | 0.288 | 0.293 | 0.293 |
|               | 0.294     | 0.285 | 0.263 | 0.265 | 0.274 |
|               | 0.284     | 0.277 | 0.291 | 0.286 | 0.28  |
| SHC Y317      | 0.404     | 0.451 | 0.463 | 0.492 | 0.436 |
|               | 0.427     | 0.449 | 0.485 | 0.502 | 0.484 |
|               | 0.42      | 0.447 | 0.456 | 0.481 | 0.453 |
|               | 0.41      | 0.434 | 0.481 | 0.485 | 0.468 |
| c-Cbl Y774    | 0.383     | 0.397 | 0.374 | 0.406 | 0.346 |
|               | 0.395     | 0.397 | 0.386 | 0.424 | 0.396 |
|               | 0.393     | 0.397 | 0.369 | 0.392 | 0.352 |
|               | 0.381     | 0.374 | 0.374 | 0.395 | 0.363 |
| Paxillin Y118 | 0.644     | 0.685 | 0.645 | 0.609 | 0.674 |
|               | 0.647     | 0.706 | 0.688 | 0.624 | 0.727 |

|              |       |       |       |       |        |
|--------------|-------|-------|-------|-------|--------|
|              | 0.633 | 0.681 | 0.649 | 0.565 | 0.651  |
|              | 0.606 | 0.652 | 0.667 | 0.577 | 0.72   |
| AKT S473     | 0.546 | 0.511 | 0.502 | 0.614 | 0.616  |
|              | 0.532 | 0.555 | 0.624 | 0.529 | 0.628  |
|              | 0.504 | 0.524 | 0.543 | 0.548 | 0.594  |
|              | 0.552 | 0.576 | 0.595 | 0.592 | 0.621  |
| GSK-3a/b S21 | 0.587 | 0.54  | 0.567 | 0.553 | 0.5683 |
|              | 0.581 | 0.468 | 0.514 | 0.583 | 0.598  |
|              | 0.546 | 0.438 | 0.527 | 0.583 | 0.572  |
|              | 0.55  | 0.534 | 0.472 | 0.617 | 0.535  |
| RPS6 S235/S2 | 0.084 | 0.069 | 0.082 | 0.129 | 0.21   |
|              | 0.078 | 0.07  | 0.08  | 0.119 | 0.201  |
|              | 0.098 | 0.074 | 0.075 | 0.128 | 0.183  |
|              | 0.109 | 0.104 | 0.11  | 0.135 | 0.22   |
| RPS6 S240/S2 | 0.075 | 0.054 | 0.067 | 0.116 | 0.145  |
|              | 0.06  | 0.054 | 0.064 | 0.105 | 0.136  |
|              | 0.087 | 0.06  | 0.062 | 0.129 | 0.115  |
|              | 0.098 | 0.097 | 0.1   | 0.13  | 0.181  |
| PKCb S660    | 0.584 | 0.558 | 0.537 | 0.681 | 0.876  |
|              | 0.56  | 0.584 | 0.579 | 0.69  | 0.94   |
|              | 0.574 | 0.568 | 0.538 | 0.631 | 0.867  |
|              | 0.566 | 0.555 | 0.552 | 0.668 | 0.961  |
| PKCd S643    | 0.602 | 0.607 | 0.627 | 0.581 | 0.609  |
|              | 0.59  | 0.615 | 0.648 | 0.595 | 0.63   |
|              | 0.598 | 0.595 | 0.637 | 0.567 | 0.594  |
|              | 0.586 | 0.584 | 0.638 | 0.578 | 0.608  |
| MARCKs S512, | 0.597 | 0.701 | 0.547 | 0.647 | 0.579  |
|              | 0.63  | 0.686 | 0.68  | 0.695 | 0.714  |
|              | 0.641 | 0.69  | 0.581 | 0.621 | 0.624  |
|              | 0.609 | 0.591 | 0.633 | 0.632 | 0.653  |
| CAMI S81     | 0.531 | 0.483 | 0.474 | 0.497 | 0.482  |
|              | 0.569 | 0.522 | 0.528 | 0.544 | 0.568  |
|              | 0.559 | 0.502 | 0.491 | 0.504 | 0.467  |
|              | 0.554 | 0.514 | 0.523 | 0.514 | 0.55   |
| RSK3 T356/S3 | 0.557 | 0.538 | 0.53  | 0.65  | 0.701  |
|              | 0.559 | 0.551 | 0.557 | 0.677 | 0.816  |
|              | 0.567 | 0.534 | 0.524 | 0.623 | 0.718  |
|              | 0.544 | 0.534 | 0.556 | 0.65  | 0.772  |
| RAF S289/S29 | 0.18  | 0.183 | 0.17  | 0.179 | 0.163  |

|              |        |        |       |       |       |
|--------------|--------|--------|-------|-------|-------|
|              | 0.19   | 0.19   | 0.18  | 0.187 | 0.196 |
|              | 0.181  | 0.177  | 0.167 | 0.17  | 0.17  |
|              | 0.178  | 0.177  | 0.173 | 0.172 | 0.171 |
| MEK S217/S22 | 0.159  | 0.169  | 0.181 | 0.391 | 0.47  |
|              | 0.178  | 0.171  | 0.211 | 0.43  | 0.673 |
|              | 0.16   | 0.165  | 0.167 | 0.335 | 0.478 |
|              | 0.167  | 0.163  | 0.187 | 0.356 | 0.59  |
| ERK T202/Y20 | 0.339  | 0.346  | 0.367 | 0.647 | 0.669 |
|              | 0.335  | 0.34   | 0.394 | 0.695 | 0.84  |
|              | 0.324  | 0.322  | 0.331 | 0.573 | 0.659 |
|              | 0.322  | 0.322  | 0.351 | 0.589 | 0.77  |
| p90RSK S380  | 0.571  | 0.232  | 0.226 | 0.218 | 0.329 |
|              | 0.537  | 0.233  | 0.22  | 0.223 | 0.302 |
|              | 0.623  | 0.246  | 0.237 | 0.231 | 0.318 |
|              | 0.61   | 0.254  | 0.217 | 0.255 | 0.31  |
| STAT1 Y701   | 0.3753 | 0.383  | 0.374 | 0.388 | 0.364 |
|              | 0.375  | 0.372  | 0.385 | 0.394 | 0.402 |
|              | 0.379  | 0.375  | 0.373 | 0.38  | 0.387 |
|              | 0.372  | 0.371  | 0.378 | 0.377 | 0.387 |
| STAT3 Y705   | 0.516  | 0.551  | 0.536 | 0.52  | 0.529 |
|              | 0.523  | 0.541  | 0.54  | 0.52  | 0.54  |
|              | 0.542  | 0.563  | 0.558 | 0.526 | 0.541 |
|              | 0.531  | 0.548  | 0.556 | 0.518 | 0.53  |
| CREB S133    | 0.518  | 0.531  | 0.509 | 0.651 | 0.652 |
|              | 0.548  | 0.5223 | 0.628 | 0.71  | 0.832 |
|              | 0.539  | 0.573  | 0.522 | 0.641 | 0.701 |
|              | 0.499  | 0.463  | 0.538 | 0.668 | 0.76  |
| NF-kB S536   | 0.573  | 0.648  | 0.616 | 0.705 | 0.698 |
|              | 0.57   | 0.669  | 0.639 | 0.721 | 0.736 |
|              | 0.561  | 0.641  | 0.592 | 0.658 | 0.668 |
|              | 0.553  | 0.625  | 0.593 | 0.671 | 0.719 |
| c-Jun S63    | 0.039  | 0.038  | 0.038 | 0.04  | 0.037 |
|              | 0.034  | 0.042  | 0.038 | 0.043 | 0.051 |
|              | 0.047  | 0.045  | 0.038 | 0.04  | 0.037 |
|              | 0.046  | 0.049  | 0.049 | 0.044 | 0.05  |
| PKC-E sh5    |        |        |       |       |       |
| PDGFRb Y771  | 0.257  | 0.272  | 0.273 | 0.289 | 0.289 |

|               |       |       |       |       |       |
|---------------|-------|-------|-------|-------|-------|
|               | 0.254 | 0.297 | 0.305 | 0.29  | 0.297 |
|               | 0.257 | 0.275 | 0.27  | 0.284 | 0.267 |
|               | 0.26  | 0.294 | 0.275 | 0.308 | 0.265 |
| SHC Y317      | 0.396 | 0.456 | 0.489 | 0.528 | 0.518 |
|               | 0.401 | 0.51  | 0.558 | 0.532 | 0.525 |
|               | 0.392 | 0.457 | 0.49  | 0.506 | 0.508 |
|               | 0.411 | 0.473 | 0.498 | 0.544 | 0.519 |
| c-Cbl Y774    | 0.369 | 0.386 | 0.341 | 0.359 | 0.364 |
|               | 0.361 | 0.397 | 0.357 | 0.364 | 0.366 |
|               | 0.369 | 0.373 | 0.331 | 0.343 | 0.357 |
|               | 0.366 | 0.384 | 0.335 | 0.368 | 0.353 |
| Paxillin Y118 | 0.592 | 0.636 | 0.649 | 0.632 | 0.604 |
|               | 0.652 | 0.706 | 0.7   | 0.681 | 0.612 |
|               | 0.593 | 0.632 | 0.629 | 0.608 | 0.581 |
|               | 0.578 | 0.646 | 0.624 | 0.633 | 0.577 |
| AKT S473      | 0.479 | 0.505 | 0.465 | 0.529 | 0.687 |
|               | 0.552 | 0.417 | 0.492 | 0.534 | 0.684 |
|               | 0.599 | 0.534 | 0.567 | 0.578 | 0.59  |
|               | 0.549 | 0.557 | 0.587 | 0.532 | 0.746 |
| GSK-3a/b S21  | 0.492 | 0.548 | 0.514 | 0.521 | 0.579 |
|               | 0.599 | 0.473 | 0.556 | 0.539 | 0.609 |
|               | 0.52  | 0.572 | 0.61  | 0.613 | 0.526 |
|               | 0.597 | 0.484 | 0.607 | 0.552 | 0.551 |
| RPS6 S235/S2  | 0.117 | 0.095 | 0.105 | 0.182 | 0.246 |
|               | 0.098 | 0.104 | 0.126 | 0.149 | 0.269 |
|               | 0.172 | 0.117 | 0.138 | 0.204 | 0.223 |
|               | 0.159 | 0.13  | 0.165 | 0.173 | 0.262 |
| RPS6 S240/S2  | 0.101 | 0.082 | 0.096 | 0.144 | 0.172 |
|               | 0.088 | 0.09  | 0.112 | 0.137 | 0.167 |
|               | 0.134 | 0.102 | 0.123 | 0.176 | 0.168 |
|               | 0.128 | 0.113 | 0.13  | 0.174 | 0.177 |
| PKCb S660     | 0.57  | 0.576 | 0.577 | 0.729 | 1.041 |
|               | 0.559 | 0.59  | 0.589 | 0.732 | 1.148 |
|               | 0.599 | 0.582 | 0.572 | 0.685 | 1.02  |
|               | 0.6   | 0.6   | 0.58  | 0.772 | 1.086 |
| PKCd S643     | 0.617 | 0.653 | 0.642 | 0.659 | 0.665 |
|               | 0.612 | 0.695 | 0.652 | 0.667 | 0.671 |
|               | 0.644 | 0.674 | 0.626 | 0.641 | 0.65  |
|               | 0.639 | 0.672 | 0.631 | 0.671 | 0.676 |

|              |       |       |       |        |       |
|--------------|-------|-------|-------|--------|-------|
| MARCKs S512, | 0.566 | 0.612 | 0.602 | 0.552  | 0.548 |
|              | 0.523 | 0.656 | 0.645 | 0.565  | 0.57  |
|              | 0.532 | 0.612 | 0.545 | 0.5677 | 0.55  |
|              | 0.544 | 0.602 | 0.547 | 0.586  | 0.522 |
| CAMI S81     | 0.487 | 0.472 | 0.487 | 0.518  | 0.552 |
|              | 0.478 | 0.529 | 0.551 | 0.541  | 0.554 |
|              | 0.515 | 0.524 | 0.492 | 0.503  | 0.52  |
|              | 0.487 | 0.516 | 0.502 | 0.562  | 0.53  |
| RSK3 T356/S3 | 0.587 | 0.55  | 0.556 | 0.62   | 0.696 |
|              | 0.58  | 0.56  | 0.569 | 0.629  | 0.715 |
|              | 0.603 | 0.555 | 0.537 | 0.598  | 0.674 |
|              | 0.591 | 0.567 | 0.545 | 0.639  | 0.702 |
| RAF S289/S29 | 0.176 | 0.175 | 0.179 | 0.177  | 0.198 |
|              | 0.175 | 0.183 | 0.188 | 0.181  | 0.203 |
|              | 0.181 | 0.175 | 0.176 | 0.164  | 0.188 |
|              | 0.179 | 0.183 | 0.181 | 0.175  | 0.19  |
| MEK S217/S2  | 0.15  | 0.158 | 0.231 | 0.502  | 0.685 |
|              | 0.174 | 0.172 | 0.253 | 0.398  | 0.755 |
|              | 0.151 | 0.155 | 0.193 | 0.429  | 0.583 |
|              | 0.16  | 0.153 | 0.203 | 0.436  | 0.645 |
| ERK T202/Y20 | 0.341 | 0.315 | 0.433 | 0.79   | 0.935 |
|              | 0.326 | 0.32  | 0.449 | 0.767  | 0.999 |
|              | 0.345 | 0.306 | 0.378 | 0.702  | 0.876 |
|              | 0.321 | 0.301 | 0.381 | 0.649  | 0.915 |
| p90RSK S380  | 0.602 | 0.248 | 0.238 | 0.227  | 0.349 |
|              | 0.646 | 0.214 | 0.238 | 0.238  | 0.345 |
|              | 0.587 | 0.248 | 0.248 | 0.246  | 0.335 |
|              | 0.597 | 0.236 | 0.255 | 0.232  | 0.413 |
| STAT1 Y701   | 0.363 | 0.375 | 0.359 | 0.389  | 0.419 |
|              | 0.356 | 0.394 | 0.382 | 0.394  | 0.424 |
|              | 0.358 | 0.379 | 0.361 | 0.379  | 0.408 |
|              | 0.367 | 0.406 | 0.365 | 0.416  | 0.416 |
| STAT3 Y705   | 0.526 | 0.569 | 0.563 | 0.549  | 0.561 |
|              | 0.516 | 0.579 | 0.579 | 0.552  | 0.562 |
|              | 0.521 | 0.575 | 0.56  | 0.547  | 0.563 |
|              | 0.531 | 0.581 | 0.569 | 0.56   | 0.564 |
| CREB S133    | 0.513 | 0.545 | 0.611 | 0.681  | 0.744 |
|              | 0.528 | 0.608 | 0.654 | 0.708  | 0.803 |
|              | 0.53  | 0.568 | 0.57  | 0.62   | 0.691 |
|              | 0.547 | 0.531 | 0.592 | 0.765  | 0.724 |

|               |       |       |        |       |       |
|---------------|-------|-------|--------|-------|-------|
| NF-kB S536    | 0.568 | 0.622 | 0.615  | 0.732 | 0.807 |
|               | 0.556 | 0.654 | 0.653  | 0.709 | 0.801 |
|               | 0.622 | 0.65  | 0.625  | 0.692 | 0.758 |
|               | 0.604 | 0.652 | 0.621  | 0.744 | 0.783 |
| c-Jun S63     | 0.041 | 0.04  | 0.033  | 0.033 | 0.046 |
|               | 0.035 | 0.048 | 0.046  | 0.034 | 0.056 |
|               | 0.042 | 0.047 | 0.041  | 0.036 | 0.036 |
|               | 0.04  | 0.047 | 0.038  | 0.044 | 0.041 |
| PDGFRb Y771   | 0.29  | 0.27  | 0.331  | 0.306 | 0.316 |
|               | 0.316 | 0.312 | 0.361  | 0.351 | 0.362 |
|               | 0.28  | 0.263 | 0.325  | 0.309 | 0.312 |
|               | 0.289 | 0.316 | 0.386  | 0.331 | 0.341 |
| SHC Y317      | 0.525 | 0.53  | 0.566  | 0.556 | 0.549 |
|               | 0.56  | 0.576 | 0.612  | 0.612 | 0.587 |
|               | 0.543 | 0.537 | 0.594  | 0.561 | 0.556 |
|               | 0.543 | 0.56  | 0.601  | 0.607 | 0.577 |
| c-Cbl Y774    | 0.445 | 0.408 | 0.428  | 0.451 | 0.442 |
|               | 0.424 | 0.399 | 0.394  | 0.422 | 0.422 |
|               | 0.459 | 0.434 | 0.448  | 0.446 | 0.458 |
|               | 0.42  | 0.401 | 0.395  | 0.457 | 0.458 |
| Paxillin Y118 | 0.666 | 0.627 | 0.666  | 0.637 | 0.634 |
|               | 0.643 | 0.625 | 0.65   | 0.612 | 0.627 |
|               | 0.723 | 0.679 | 0.744  | 0.712 | 0.696 |
|               | 0.743 | 0.781 | 0.753  | 0.687 | 0.801 |
| AKT S473      | 0.527 | 0.524 | 0.583  | 0.516 | 0.643 |
|               | 0.432 | 0.483 | 0.568  | 0.55  | 0.583 |
|               | 0.551 | 0.555 | 0.642  | 0.622 | 0.826 |
|               | 0.551 | 0.63  | 0.671  | 0.652 | 0.788 |
| GSK-3a/b S21  | 0.518 | 0.619 | 0.527  | 0.605 | 0.662 |
|               | 0.546 | 0.589 | 0.5475 | 0.58  | 0.588 |
|               | 0.601 | 0.584 | 0.568  | 0.607 | 0.53  |
|               | 0.556 | 0.606 | 0.5475 | 0.595 | 0.595 |
| RPS6 S235/S2  | 0.104 | 0.116 | 0.13   | 0.155 | 0.221 |
|               | 0.094 | 0.114 | 0.133  | 0.165 | 0.202 |
|               | 0.107 | 0.103 | 0.13   | 0.127 | 0.231 |
|               | 0.115 | 0.125 | 0.144  | 0.154 | 0.243 |

|              |       |       |        |       |       |
|--------------|-------|-------|--------|-------|-------|
| RPS6 S240/S2 | 0.075 | 0.084 | 0.098  | 0.12  | 0.12  |
|              | 0.071 | 0.091 | 0.103  | 0.139 | 0.101 |
|              | 0.078 | 0.091 | 0.094  | 0.098 | 0.131 |
|              | 0.081 | 0.076 | 0.093  | 0.129 | 0.14  |
| PKCb S660    | 0.284 | 0.296 | 0.319  | 0.345 | 0.46  |
|              | 0.3   | 0.363 | 0.342  | 0.413 | 0.503 |
|              | 0.282 | 0.288 | 0.309  | 0.366 | 0.421 |
|              | 0.317 | 0.292 | 0.36   | 0.369 | 0.459 |
| PKCd S643    | 0.346 | 0.341 | 0.349  | 0.385 | 0.355 |
|              | 0.387 | 0.4   | 0.3503 | 0.36  | 0.409 |
|              | 0.335 | 0.351 | 0.361  | 0.331 | 0.351 |
|              | 0.378 | 0.358 | 0.341  | 0.364 | 0.354 |
| MARCKs S512, | 0.12  | 0.078 | 0.074  | 0.133 | 0.127 |
|              | 0.079 | 0.121 | 0.071  | 0.094 | 0.119 |
|              | 0.226 | 0.214 | 0.297  | 0.216 | 0.216 |
|              | 0.435 | 0.323 | 0.391  | 0.331 | 0.468 |
| CAMI S81     | 0.41  | 0.417 | 0.427  | 0.496 | 0.396 |
|              | 0.519 | 0.517 | 0.609  | 0.579 | 0.57  |
|              | 0.5   | 0.493 | 0.576  | 0.512 | 0.52  |
|              | 0.553 | 0.621 | 0.731  | 0.601 | 0.637 |
| RSK3 T356/S3 | 0.608 | 0.555 | 0.649  | 0.695 | 0.814 |
|              | 0.567 | 0.557 | 0.659  | 0.617 | 0.762 |
|              | 0.635 | 0.647 | 0.733  | 0.752 | 0.872 |
|              | 0.607 | 0.651 | 0.717  | 0.712 | 0.901 |
| RAF S289/S29 | 0.199 | 0.197 | 0.206  | 0.19  | 0.202 |
|              | 0.187 | 0.194 | 0.197  | 0.183 | 0.194 |
|              | 0.207 | 0.204 | 0.203  | 0.205 | 0.217 |
|              | 0.155 | 0.163 | 0.185  | 0.157 | 0.164 |
| MEK S217/S2: | 0.179 | 0.192 | 0.45   | 0.516 | 0.921 |
|              | 0.169 | 0.18  | 0.374  | 0.399 | 0.801 |
|              | 0.198 | 0.203 | 0.458  | 0.651 | 0.947 |
|              | 0.181 | 0.2   | 0.446  | 0.438 | 1.064 |
| ERK T202/Y20 | 0.364 | 0.338 | 0.753  | 0.762 | 0.993 |
|              | 0.323 | 0.316 | 0.663  | 0.808 | 0.909 |
|              | 0.368 | 0.342 | 0.777  | 0.785 | 1.002 |
|              | 0.346 | 0.341 | 0.692  | 0.889 | 1.059 |
| p90RSK S380  | 0.428 | 0.326 | 0.322  | 0.335 | 0.4   |
|              | 0.513 | 0.264 | 0.278  | 0.329 | 0.345 |
|              | 0.271 | 0.259 | 0.288  | 0.526 | 0.432 |

|               |            |        |       |       |       |
|---------------|------------|--------|-------|-------|-------|
|               | 0.259      | 0.261  | 0.332 | 0.481 | 0.412 |
| STAT1 Y701    | 0.379      | 0.377  | 0.397 | 0.406 | 0.417 |
|               | 0.418      | 0.425  | 0.432 | 0.454 | 0.461 |
|               | 0.405      | 0.396  | 0.418 | 0.405 | 0.434 |
|               | 0.412      | 0.408  | 0.44  | 0.422 | 0.456 |
| STAT3 Y705    | 0.59       | 0.596  | 0.609 | 0.649 | 0.586 |
|               | 0.622      | 0.661  | 0.634 | 0.676 | 0.643 |
|               | 0.627      | 0.608  | 0.618 | 0.647 | 0.616 |
|               | 0.65       | 0.672  | 0.734 | 0.695 | 0.645 |
| CREB S133     | 0.712      | 0.584  | 0.822 | 0.861 | 0.892 |
|               | 0.762      | 0.759  | 0.922 | 0.977 | 1.058 |
|               | 0.751      | 0.682  | 0.867 | 0.942 | 0.958 |
|               | 0.715      | 0.628  | 0.837 | 0.917 | 0.964 |
| NF-kB S536    | 0.785      | 0.798  | 0.835 | 0.868 | 0.927 |
|               | 0.7913     | 0.78   | 0.804 | 0.811 | 0.868 |
|               | 0.8        | 0.821  | 0.838 | 0.842 | 0.914 |
|               | 0.789      | 0.805  | 0.834 | 0.829 | 0.946 |
| c-Jun S63     | 0.062      | 0.058  | 0.061 | 0.048 | 0.064 |
|               | 0.05       | 0.064  | 0.06  | 0.054 | 0.053 |
|               | 0.062      | 0.068  | 0.068 | 0.07  | 0.067 |
|               | 0.06       | 0.0633 | 0.063 | 0.074 | 0.079 |
|               | CAMK2D sh4 |        |       |       |       |
| PDGFRb Y771   | 0.289      | 0.291  | 0.297 | 0.289 | 0.294 |
|               | 0.269      | 0.289  | 0.289 | 0.289 | 0.29  |
|               | 0.33       | 0.311  | 0.309 | 0.337 | 0.32  |
|               | 0.304      | 0.325  | 0.316 | 0.337 | 0.317 |
| SHC Y317      | 0.475      | 0.521  | 0.549 | 0.551 | 0.553 |
|               | 0.436      | 0.522  | 0.537 | 0.546 | 0.543 |
|               | 0.5        | 0.545  | 0.578 | 0.607 | 0.588 |
|               | 0.473      | 0.575  | 0.568 | 0.608 | 0.59  |
| c-Cbl Y774    | 0.452      | 0.438  | 0.438 | 0.416 | 0.438 |
|               | 0.447      | 0.394  | 0.436 | 0.412 | 0.404 |
|               | 0.445      | 0.389  | 0.409 | 0.391 | 0.406 |
|               | 0.433      | 0.399  | 0.419 | 0.391 | 0.405 |
| Paxillin Y118 | 0.763      | 0.721  | 0.707 | 0.723 | 0.688 |
|               | 0.769      | 0.708  | 0.684 | 0.717 | 0.668 |
|               | 0.757      | 0.683  | 0.655 | 0.7   | 0.66  |

|              |        |       |       |        |       |
|--------------|--------|-------|-------|--------|-------|
|              | 0.739  | 0.711 | 0.675 | 0.696  | 0.655 |
| AKT S473     | 0.731  | 0.572 | 0.708 | 0.64   | 0.734 |
|              | 0.667  | 0.616 | 0.678 | 0.757  | 0.659 |
|              | 0.677  | 0.644 | 0.594 | 0.556  | 0.6   |
|              | 0.645  | 0.605 | 0.612 | 0.564  | 0.564 |
| GSK-3a/b S21 | 0.588  | 0.636 | 0.591 | 0.664  | 0.599 |
|              | 0.606  | 0.573 | 0.603 | 0.66   | 0.667 |
|              | 0.587  | 0.574 | 0.509 | 0.593  | 0.641 |
|              | 0.571  | 0.582 | 0.539 | 0.586  | 0.621 |
| RPS6 S235/S2 | 0.09   | 0.064 | 0.067 | 0.117  | 0.281 |
|              | 0.081  | 0.058 | 0.065 | 0.131  | 0.308 |
|              | 0.085  | 0.068 | 0.071 | 0.108  | 0.239 |
|              | 0.073  | 0.069 | 0.081 | 0.116  | 0.256 |
| RPS6 S240/S2 | 0.135  | 0.105 | 0.1   | 0.111  | 0.177 |
|              | 0.117  | 0.097 | 0.087 | 0.118  | 0.185 |
|              | 0.103  | 0.089 | 0.088 | 0.108  | 0.165 |
|              | 0.092  | 0.086 | 0.1   | 0.119  | 0.166 |
| PKCb S660    | 0.57   | 0.582 | 0.594 | 0.848  | 1.096 |
|              | 0.552  | 0.584 | 0.591 | 0.828  | 1.094 |
|              | 0.615  | 0.626 | 0.61  | 0.931  | 1.127 |
|              | 0.609  | 0.624 | 0.608 | 0.942  | 1.115 |
| PKCd S643    | 0.754  | 0.697 | 0.666 | 0.676  | 0.682 |
|              | 0.7    | 0.687 | 0.669 | 0.675  | 0.657 |
|              | 0.7393 | 0.716 | 0.696 | 0.6755 | 0.69  |
|              | 0.764  | 0.753 | 0.691 | 0.6755 | 0.692 |
| MARCKs S512, | 0.771  | 0.71  | 0.786 | 0.792  | 0.73  |
|              | 0.717  | 0.809 | 0.778 | 0.756  | 0.679 |
|              | 0.742  | 0.692 | 0.688 | 0.769  | 0.684 |
|              | 0.73   | 0.787 | 0.721 | 0.762  | 0.687 |
| CAMI S81     | 0.274  | 0.24  | 0.238 | 0.185  | 0.257 |
|              | 0.183  | 0.212 | 0.229 | 0.283  | 0.281 |
|              | 0.463  | 0.353 | 0.333 | 0.384  | 0.316 |
|              | 0.369  | 0.398 | 0.34  | 0.385  | 0.318 |
| RSK3 T356/S3 | 0.564  | 0.63  | 0.602 | 0.694  | 0.769 |
|              | 0.565  | 0.612 | 0.584 | 0.696  | 0.762 |
|              | 0.551  | 0.601 | 0.544 | 0.653  | 0.72  |
|              | 0.542  | 0.612 | 0.579 | 0.656  | 0.719 |
| RAF S289/S29 | 0.223  | 0.226 | 0.215 | 0.216  | 0.224 |
|              | 0.21   | 0.219 | 0.212 | 0.213  | 0.217 |

|              |            |       |       |        |       |
|--------------|------------|-------|-------|--------|-------|
|              | 0.211      | 0.201 | 0.193 | 0.192  | 0.197 |
|              | 0.202      | 0.209 | 0.203 | 0.195  | 0.194 |
| MEK S217/S22 | 0.23       | 0.234 | 0.28  | 0.72   | 0.813 |
|              | 0.247      | 0.235 | 0.286 | 0.724  | 0.94  |
|              | 0.218      | 0.196 | 0.234 | 0.563  | 0.815 |
|              | 0.225      | 0.198 | 0.246 | 0.711  | 0.824 |
| ERK T202/Y20 | 0.466      | 0.433 | 0.494 | 0.933  | 1.171 |
|              | 0.449      | 0.416 | 0.511 | 0.975  | 1.121 |
|              | 0.443      | 0.376 | 0.418 | 0.839  | 0.814 |
|              | 0.412      | 0.382 | 0.449 | 0.877  | 1.064 |
| p90RSK S380  | 0.469      | 0.325 | 0.387 | 0.426  | 0.504 |
|              | 0.46       | 0.322 | 0.424 | 0.427  | 0.533 |
|              | 0.591      | 0.284 | 0.281 | 0.231  | 0.433 |
|              | 0.569      | 0.262 | 0.282 | 0.259  | 0.449 |
| STAT1 Y701   | 0.417      | 0.415 | 0.417 | 0.415  | 0.444 |
|              | 0.395      | 0.408 | 0.411 | 0.416  | 0.447 |
|              | 0.4013     | 0.395 | 0.406 | 0.447  | 0.464 |
|              | 0.392      | 0.423 | 0.414 | 0.44   | 0.465 |
| STAT3 Y705   | 0.648      | 0.591 | 0.577 | 0.576  | 0.606 |
|              | 0.627      | 0.598 | 0.576 | 0.588  | 0.594 |
|              | 0.693      | 0.621 | 0.604 | 0.635  | 0.632 |
|              | 0.676      | 0.642 | 0.602 | 0.656  | 0.642 |
| CREB S133    | 0.568      | 0.489 | 0.664 | 0.689  | 0.924 |
|              | 0.544      | 0.65  | 0.688 | 0.675  | 0.873 |
|              | 0.693      | 0.563 | 0.695 | 0.926  | 0.943 |
|              | 0.611      | 0.764 | 0.699 | 0.908  | 1     |
| NF-kB S536   | 0.613      | 0.649 | 0.687 | 0.743  | 0.842 |
|              | 0.611      | 0.635 | 0.679 | 0.733  | 0.782 |
|              | 0.588      | 0.604 | 0.643 | 0.683  | 0.765 |
|              | 0.591      | 0.604 | 0.65  | 0.692  | 0.756 |
| c-Jun S63    | 0.033      | 0.04  | 0.031 | 0.03   | 0.045 |
|              | 0.03       | 0.033 | 0.037 | 0.0373 | 0.046 |
|              | 0.038      | 0.039 | 0.04  | 0.04   | 0.044 |
|              | 0.038      | 0.038 | 0.042 | 0.042  | 0.045 |
|              | CAMK2D sh9 |       |       |        |       |
| PDGFRb Y771  | 0.281      | 0.302 | 0.278 | 0.297  | 0.288 |
|              | 0.281      | 0.302 | 0.268 | 0.284  | 0.286 |

|               |       |       |       |       |       |
|---------------|-------|-------|-------|-------|-------|
|               | 0.302 | 0.311 | 0.278 | 0.306 | 0.295 |
|               | 0.287 | 0.309 | 0.269 | 0.304 | 0.296 |
| SHC Y317      | 0.486 | 0.502 | 0.547 | 0.538 | 0.527 |
|               | 0.482 | 0.486 | 0.55  | 0.537 | 0.529 |
|               | 0.494 | 0.512 | 0.55  | 0.56  | 0.527 |
|               | 0.478 | 0.507 | 0.55  | 0.552 | 0.527 |
| c-Cbl Y774    | 0.283 | 0.339 | 0.366 | 0.38  | 0.398 |
|               | 0.297 | 0.349 | 0.361 | 0.372 | 0.404 |
|               | 0.397 | 0.413 | 0.409 | 0.431 | 0.439 |
|               | 0.396 | 0.406 | 0.4   | 0.417 | 0.436 |
| Paxillin Y118 | 0.632 | 0.64  | 0.659 | 0.607 | 0.645 |
|               | 0.587 | 0.612 | 0.63  | 0.637 | 0.676 |
|               | 0.692 | 0.669 | 0.671 | 0.661 | 0.705 |
|               | 0.685 | 0.659 | 0.671 | 0.643 | 0.687 |
| AKT S473      | 0.474 | 0.61  | 0.574 | 0.553 | 0.633 |
|               | 0.486 | 0.606 | 0.568 | 0.721 | 0.675 |
|               | 0.558 | 0.657 | 0.575 | 0.584 | 0.648 |
|               | 0.514 | 0.596 | 0.564 | 0.729 | 0.816 |
| GSK-3a/b S21  | 0.472 | 0.555 | 0.563 | 0.589 | 0.631 |
|               | 0.508 | 0.556 | 0.584 | 0.564 | 0.607 |
|               | 0.521 | 0.595 | 0.565 | 0.658 | 0.696 |
|               | 0.506 | 0.532 | 0.551 | 0.647 | 0.683 |
| RPS6 S235/S2  | 0.129 | 0.139 | 0.143 | 0.167 | 0.309 |
|               | 0.164 | 0.143 | 0.174 | 0.191 | 0.356 |
|               | 0.195 | 0.174 | 0.162 | 0.202 | 0.344 |
|               | 0.174 | 0.171 | 0.168 | 0.232 | 0.395 |
| RPS6 S240/S2  | 0.168 | 0.164 | 0.207 | 0.214 | 0.271 |
|               | 0.156 | 0.182 | 0.226 | 0.261 | 0.28  |
|               | 0.269 | 0.263 | 0.283 | 0.307 | 0.356 |
|               | 0.239 | 0.259 | 0.293 | 0.334 | 0.386 |
| PKCb S660     | 0.606 | 0.557 | 0.562 | 0.771 | 0.945 |
|               | 0.551 | 0.593 | 0.583 | 0.864 | 1.023 |
|               | 0.616 | 0.569 | 0.597 | 0.856 | 1.024 |
|               | 0.577 | 0.57  | 0.612 | 0.898 | 1.035 |
| PKCd S643     | 0.707 | 0.691 | 0.705 | 0.679 | 0.683 |
|               | 0.656 | 0.7   | 0.695 | 0.692 | 0.668 |
|               | 0.661 | 0.701 | 0.698 | 0.7   | 0.707 |
|               | 0.666 | 0.7   | 0.68  | 0.693 | 0.68  |
| MARCKs S512,  | 0.615 | 0.641 | 0.728 | 0.654 | 0.569 |

|              |       |       |       |       |       |
|--------------|-------|-------|-------|-------|-------|
|              | 0.606 | 0.709 | 0.692 | 0.602 | 0.56  |
|              | 0.611 | 0.664 | 0.648 | 0.665 | 0.579 |
|              | 0.582 | 0.668 | 0.628 | 0.618 | 0.568 |
| CAMI S81     | 0.481 | 0.518 | 0.499 | 0.442 | 0.375 |
|              | 0.485 | 0.433 | 0.426 | 0.37  | 0.38  |
|              | 0.335 | 0.311 | 0.271 | 0.247 | 0.266 |
|              | 0.252 | 0.283 | 0.262 | 0.225 | 0.229 |
| RSK3 T356/S3 | 0.496 | 0.516 | 0.543 | 0.53  | 0.574 |
|              | 0.483 | 0.514 | 0.542 | 0.519 | 0.587 |
|              | 0.534 | 0.545 | 0.576 | 0.584 | 0.632 |
|              | 0.535 | 0.549 | 0.575 | 0.566 | 0.629 |
| RAF S289/S29 | 0.17  | 0.189 | 0.2   | 0.193 | 0.198 |
|              | 0.167 | 0.182 | 0.186 | 0.188 | 0.194 |
|              | 0.187 | 0.198 | 0.196 | 0.208 | 0.213 |
|              | 0.183 | 0.194 | 0.193 | 0.207 | 0.208 |
| MEK S217/S2  | 0.137 | 0.169 | 0.318 | 0.636 | 0.791 |
|              | 0.147 | 0.18  | 0.334 | 0.653 | 0.773 |
|              | 0.202 | 0.24  | 0.336 | 0.617 | 0.688 |
|              | 0.216 | 0.233 | 0.335 | 0.773 | 0.862 |
| ERK T202/Y20 | 0.38  | 0.391 | 0.596 | 0.892 | 1.015 |
|              | 0.374 | 0.387 | 0.594 | 0.877 | 1.11  |
|              | 0.441 | 0.452 | 0.584 | 0.902 | 1.098 |
|              | 0.41  | 0.453 | 0.598 | 0.937 | 1.09  |
| p90RSK S380  | 0.158 | 0.247 | 0.225 | 0.29  | 0.357 |
|              | 0.158 | 0.25  | 0.242 | 0.328 | 0.413 |
|              | 0.526 | 0.277 | 0.295 | 0.318 | 0.422 |
|              | 0.44  | 0.285 | 0.285 | 0.344 | 0.463 |
| STAT1 Y701   | 0.402 | 0.434 | 0.444 | 0.43  | 0.441 |
|              | 0.422 | 0.452 | 0.426 | 0.43  | 0.454 |
|              | 0.421 | 0.443 | 0.429 | 0.44  | 0.466 |
|              | 0.416 | 0.441 | 0.441 | 0.444 | 0.46  |
| STAT3 Y705   | 0.571 | 0.638 | 0.64  | 0.582 | 0.639 |
|              | 0.597 | 0.633 | 0.618 | 0.578 | 0.64  |
|              | 0.617 | 0.618 | 0.62  | 0.583 | 0.653 |
|              | 0.607 | 0.641 | 0.621 | 0.589 | 0.649 |
| CREB S133    | 0.54  | 0.458 | 0.612 | 0.709 | 0.818 |
|              | 0.517 | 0.537 | 0.633 | 0.734 | 0.862 |
|              | 0.575 | 0.517 | 0.637 | 0.753 | 0.884 |
|              | 0.557 | 0.6   | 0.639 | 0.793 | 0.909 |

|               |       |       |        |       |        |
|---------------|-------|-------|--------|-------|--------|
| NF-kB S536    | 0.613 | 0.557 | 0.58   | 0.675 | 0.697  |
|               | 0.586 | 0.585 | 0.615  | 0.713 | 0.74   |
|               | 0.612 | 0.591 | 0.59   | 0.715 | 0.75   |
|               | 0.625 | 0.609 | 0.618  | 0.723 | 0.754  |
| c-Jun S63     | 0.043 | 0.044 | 0.041  | 0.039 | 0.047  |
|               | 0.036 | 0.04  | 0.042  | 0.042 | 0.047  |
|               | 0.046 | 0.045 | 0.04   | 0.042 | 0.051  |
|               | 0.039 | 0.043 | 0.041  | 0.037 | 0.046  |
| CAMKK2 sh7    |       |       |        |       |        |
| PDGFRb Y771   | 0.276 | 0.262 | 0.28   | 0.278 | 0.276  |
|               | 0.27  | 0.258 | 0.283  | 0.276 | 0.279  |
|               | 0.289 | 0.276 | 0.285  | 0.281 | 0.283  |
|               | 0.285 | 0.286 | 0.2827 | 0.286 | 0.287  |
| SHC Y317      | 0.423 | 0.463 | 0.486  | 0.508 | 0.532  |
|               | 0.415 | 0.453 | 0.503  | 0.519 | 0.518  |
|               | 0.449 | 0.479 | 0.494  | 0.519 | 0.546  |
|               | 0.452 | 0.517 | 0.506  | 0.534 | 0.566  |
| c-Cbl Y774    | 0.425 | 0.432 | 0.399  | 0.4   | 0.401  |
|               | 0.411 | 0.426 | 0.422  | 0.417 | 0.404  |
|               | 0.409 | 0.418 | 0.389  | 0.419 | 0.393  |
|               | 0.426 | 0.436 | 0.408  | 0.412 | 0.4    |
| Paxillin Y118 | 0.735 | 0.733 | 0.733  | 0.734 | 0.67   |
|               | 0.72  | 0.716 | 0.753  | 0.726 | 0.668  |
|               | 0.718 | 0.704 | 0.708  | 0.729 | 0.664  |
|               | 0.738 | 0.75  | 0.743  | 0.753 | 0.666  |
| AKT S473      | 0.494 | 0.546 | 0.495  | 0.56  | 0.629  |
|               | 0.431 | 0.509 | 0.563  | 0.649 | 0.602  |
|               | 0.447 | 0.526 | 0.461  | 0.661 | 0.566  |
|               | 0.442 | 0.499 | 0.478  | 0.517 | 0.559  |
| GSK-3a/b S21  | 0.526 | 0.53  | 0.54   | 0.501 | 0.536  |
|               | 0.522 | 0.522 | 0.5107 | 0.488 | 0.5487 |
|               | 0.496 | 0.508 | 0.484  | 0.477 | 0.608  |
|               | 0.495 | 0.509 | 0.508  | 0.481 | 0.502  |
| RPS6 S235/S2  | 0.19  | 0.143 | 0.162  | 0.221 | 0.42   |
|               | 0.208 | 0.166 | 0.217  | 0.258 | 0.433  |
|               | 0.179 | 0.164 | 0.16   | 0.221 | 0.335  |
|               | 0.164 | 0.173 | 0.176  | 0.226 | 0.352  |

|              |       |       |       |       |       |
|--------------|-------|-------|-------|-------|-------|
| RPS6 S240/S2 | 0.19  | 0.15  | 0.165 | 0.228 | 0.252 |
|              | 0.208 | 0.159 | 0.226 | 0.208 | 0.278 |
|              | 0.214 | 0.18  | 0.172 | 0.196 | 0.237 |
|              | 0.159 | 0.195 | 0.178 | 0.209 | 0.254 |
| PKCb S660    | 0.558 | 0.553 | 0.524 | 0.825 | 1.023 |
|              | 0.551 | 0.556 | 0.553 | 0.845 | 1.017 |
|              | 0.551 | 0.58  | 0.538 | 0.849 | 1.056 |
|              | 0.569 | 0.563 | 0.54  | 0.841 | 1.04  |
| PKCd S643    | 0.622 | 0.659 | 0.625 | 0.627 | 0.598 |
|              | 0.618 | 0.654 | 0.626 | 0.629 | 0.601 |
|              | 0.628 | 0.673 | 0.632 | 0.634 | 0.615 |
|              | 0.641 | 0.671 | 0.621 | 0.63  | 0.659 |
| MARCKs S512, | 0.469 | 0.511 | 0.481 | 0.471 | 0.445 |
|              | 0.469 | 0.51  | 0.505 | 0.464 | 0.44  |
|              | 0.461 | 0.504 | 0.455 | 0.462 | 0.437 |
|              | 0.475 | 0.522 | 0.48  | 0.474 | 0.437 |
| CAMI S81     | 0.267 | 0.269 | 0.228 | 0.241 | 0.261 |
|              | 0.243 | 0.23  | 0.281 | 0.264 | 0.26  |
|              | 0.263 | 0.264 | 0.242 | 0.278 | 0.272 |
|              | 0.308 | 0.31  | 0.304 | 0.294 | 0.314 |
| RSK3 T356/S3 | 0.575 | 0.559 | 0.556 | 0.629 | 0.655 |
|              | 0.569 | 0.555 | 0.599 | 0.663 | 0.657 |
|              | 0.559 | 0.553 | 0.552 | 0.657 | 0.664 |
|              | 0.575 | 0.589 | 0.573 | 0.673 | 0.672 |
| RAF S289/S29 | 0.183 | 0.193 | 0.178 | 0.185 | 0.196 |
|              | 0.176 | 0.188 | 0.189 | 0.188 | 0.201 |
|              | 0.188 | 0.183 | 0.184 | 0.186 | 0.191 |
|              | 0.193 | 0.2   | 0.185 | 0.196 | 0.199 |
| MEK S217/S2  | 0.173 | 0.19  | 0.27  | 0.784 | 1.044 |
|              | 0.194 | 0.196 | 0.336 | 0.815 | 1.04  |
|              | 0.177 | 0.182 | 0.246 | 0.765 | 0.959 |
|              | 0.193 | 0.198 | 0.256 | 0.783 | 0.979 |
| ERK T202/Y20 | 0.387 | 0.375 | 0.493 | 0.862 | 0.959 |
|              | 0.357 | 0.373 | 0.559 | 1.111 | 1.039 |
|              | 0.376 | 0.351 | 0.437 | 0.842 | 0.916 |
|              | 0.351 | 0.39  | 0.475 | 1.058 | 0.961 |
| p90RSK S380  | 0.631 | 0.205 | 0.228 | 0.206 | 0.437 |
|              | 0.583 | 0.207 | 0.211 | 0.234 | 0.488 |
|              | 0.578 | 0.221 | 0.24  | 0.21  | 0.501 |
|              | 0.538 | 0.202 | 0.237 | 0.218 | 0.508 |

|               |       |        |       |       |        |
|---------------|-------|--------|-------|-------|--------|
| STAT1 Y701    | 0.359 | 0.379  | 0.365 | 0.393 | 0.449  |
|               | 0.36  | 0.389  | 0.371 | 0.401 | 0.442  |
|               | 0.367 | 0.4    | 0.384 | 0.409 | 0.451  |
|               | 0.372 | 0.412  | 0.393 | 0.41  | 0.465  |
| STAT3 Y705    | 0.561 | 0.579  | 0.568 | 0.59  | 0.568  |
|               | 0.569 | 0.579  | 0.568 | 0.597 | 0.555  |
|               | 0.58  | 0.571  | 0.559 | 0.611 | 0.588  |
|               | 0.592 | 0.5763 | 0.596 | 0.613 | 0.58   |
| CREB S133     | 0.505 | 0.429  | 0.502 | 0.623 | 0.713  |
|               | 0.475 | 0.464  | 0.566 | 0.686 | 0.748  |
|               | 0.507 | 0.469  | 0.525 | 0.662 | 0.761  |
|               | 0.532 | 0.559  | 0.559 | 0.685 | 0.802  |
| NF-kB S536    | 0.595 | 0.599  | 0.595 | 0.718 | 0.692  |
|               | 0.589 | 0.603  | 0.653 | 0.745 | 0.685  |
|               | 0.571 | 0.584  | 0.599 | 0.733 | 0.67   |
|               | 0.589 | 0.601  | 0.61  | 0.667 | 0.687  |
| c-Jun S63     | 0.063 | 0.076  | 0.056 | 0.064 | 0.085  |
|               | 0.064 | 0.076  | 0.088 | 0.081 | 0.092  |
|               | 0.055 | 0.059  | 0.047 | 0.063 | 0.075  |
|               | 0.074 | 0.087  | 0.068 | 0.077 | 0.094  |
| CAMKK2 sh9    |       |        |       |       |        |
| PDGFRb Y771   | 0.312 | 0.32   | 0.328 | 0.303 | 0.323  |
|               | 0.299 | 0.316  | 0.329 | 0.3   | 0.314  |
|               | 0.3   | 0.308  | 0.32  | 0.284 | 0.311  |
|               | 0.297 | 0.311  | 0.323 | 0.295 | 0.311  |
| SHC Y317      | 0.427 | 0.524  | 0.573 | 0.557 | 0.55   |
|               | 0.405 | 0.5103 | 0.57  | 0.583 | 0.539  |
|               | 0.389 | 0.492  | 0.551 | 0.519 | 0.526  |
|               | 0.393 | 0.515  | 0.549 | 0.551 | 0.522  |
| c-Cbl Y774    | 0.378 | 0.379  | 0.409 | 0.414 | 0.406  |
|               | 0.381 | 0.383  | 0.396 | 0.396 | 0.4077 |
|               | 0.392 | 0.383  | 0.414 | 0.411 | 0.411  |
|               | 0.388 | 0.4    | 0.406 | 0.422 | 0.406  |
| Paxillin Y118 | 0.705 | 0.698  | 0.706 | 0.702 | 0.723  |
|               | 0.714 | 0.677  | 0.71  | 0.703 | 0.686  |
|               | 0.714 | 0.683  | 0.715 | 0.713 | 0.726  |
|               | 0.741 | 0.691  | 0.721 | 0.717 | 0.723  |

|              |       |       |       |       |       |
|--------------|-------|-------|-------|-------|-------|
| AKT S473     | 0.612 | 0.533 | 0.693 | 0.599 | 0.716 |
|              | 0.651 | 0.522 | 0.552 | 0.612 | 0.63  |
|              | 0.632 | 0.524 | 0.514 | 0.552 | 0.628 |
|              | 0.587 | 0.63  | 0.51  | 0.601 | 0.611 |
| GSK-3a/b S21 | 0.578 | 0.518 | 0.518 | 0.638 | 0.586 |
|              | 0.609 | 0.52  | 0.53  | 0.566 | 0.533 |
|              | 0.606 | 0.629 | 0.485 | 0.595 | 0.549 |
|              | 0.572 | 0.526 | 0.516 | 0.53  | 0.519 |
| RPS6 S235/S2 | 0.136 | 0.122 | 0.124 | 0.181 | 0.429 |
|              | 0.161 | 0.117 | 0.133 | 0.183 | 0.419 |
|              | 0.169 | 0.181 | 0.155 | 0.196 | 0.382 |
|              | 0.143 | 0.161 | 0.165 | 0.214 | 0.378 |
| RPS6 S240/S2 | 0.145 | 0.134 | 0.141 | 0.208 | 0.303 |
|              | 0.148 | 0.129 | 0.147 | 0.194 | 0.299 |
|              | 0.153 | 0.175 | 0.151 | 0.175 | 0.281 |
|              | 0.146 | 0.166 | 0.165 | 0.181 | 0.273 |
| PKCb S660    | 0.607 | 0.575 | 0.59  | 0.893 | 1.124 |
|              | 0.615 | 0.599 | 0.594 | 0.936 | 1.083 |
|              | 0.561 | 0.546 | 0.548 | 0.795 | 0.991 |
|              | 0.559 | 0.546 | 0.531 | 0.839 | 0.984 |
| PKCd S643    | 0.669 | 0.663 | 0.677 | 0.725 | 0.707 |
|              | 0.651 | 0.655 | 0.669 | 0.712 | 0.675 |
|              | 0.615 | 0.622 | 0.637 | 0.667 | 0.666 |
|              | 0.625 | 0.636 | 0.635 | 0.677 | 0.676 |
| MARCKs S512, | 0.648 | 0.719 | 0.725 | 0.646 | 0.633 |
|              | 0.652 | 0.768 | 0.728 | 0.661 | 0.587 |
|              | 0.679 | 0.712 | 0.703 | 0.662 | 0.616 |
|              | 0.668 | 0.774 | 0.691 | 0.695 | 0.62  |
| CAMI S81     | 0.327 | 0.302 | 0.307 | 0.31  | 0.315 |
|              | 0.29  | 0.28  | 0.295 | 0.284 | 0.265 |
|              | 0.267 | 0.25  | 0.257 | 0.243 | 0.249 |
|              | 0.267 | 0.271 | 0.245 | 0.266 | 0.275 |
| RSK3 T356/S3 | 0.559 | 0.58  | 0.585 | 0.602 | 0.714 |
|              | 0.567 | 0.572 | 0.599 | 0.6   | 0.642 |
|              | 0.595 | 0.562 | 0.601 | 0.565 | 0.671 |
|              | 0.599 | 0.606 | 0.614 | 0.631 | 0.735 |
| RAF S289/S29 | 0.177 | 0.183 | 0.176 | 0.185 | 0.19  |
|              | 0.18  | 0.179 | 0.18  | 0.183 | 0.181 |
|              | 0.182 | 0.175 | 0.192 | 0.182 | 0.198 |

|              |            |        |        |       |       |
|--------------|------------|--------|--------|-------|-------|
|              | 0.181      | 0.179  | 0.192  | 0.199 | 0.202 |
| MEK S217/S22 | 0.203      | 0.197  | 0.275  | 0.549 | 0.823 |
|              | 0.1947     | 0.194  | 0.288  | 0.649 | 0.738 |
|              | 0.183      | 0.169  | 0.243  | 0.553 | 0.765 |
|              | 0.198      | 0.191  | 0.254  | 0.642 | 0.757 |
| ERK T202/Y20 | 0.417      | 0.402  | 0.541  | 0.86  | 1.188 |
|              | 0.382      | 0.417  | 0.55   | 0.971 | 1.135 |
|              | 0.421      | 0.365  | 0.491  | 0.854 | 1.169 |
|              | 0.381      | 0.396  | 0.512  | 0.958 | 1.166 |
| p90RSK S380  | 0.586      | 0.255  | 0.2397 | 0.247 | 0.379 |
|              | 0.526      | 0.2513 | 0.241  | 0.243 | 0.503 |
|              | 0.591      | 0.254  | 0.231  | 0.232 | 0.417 |
|              | 0.527      | 0.245  | 0.247  | 0.235 | 0.47  |
| STAT1 Y701   | 0.377      | 0.407  | 0.419  | 0.417 | 0.451 |
|              | 0.367      | 0.428  | 0.418  | 0.421 | 0.452 |
|              | 0.364      | 0.401  | 0.401  | 0.381 | 0.433 |
|              | 0.371      | 0.411  | 0.404  | 0.394 | 0.447 |
| STAT3 Y705   | 0.572      | 0.59   | 0.584  | 0.598 | 0.591 |
|              | 0.576      | 0.597  | 0.581  | 0.595 | 0.583 |
|              | 0.547      | 0.578  | 0.572  | 0.56  | 0.563 |
|              | 0.558      | 0.574  | 0.577  | 0.579 | 0.573 |
| CREB S133    | 0.58       | 0.499  | 0.565  | 0.675 | 0.853 |
|              | 0.564      | 0.561  | 0.614  | 0.719 | 0.783 |
|              | 0.522      | 0.479  | 0.549  | 0.601 | 0.745 |
|              | 0.517      | 0.54   | 0.532  | 0.635 | 0.783 |
| NF-kB S536   | 0.637      | 0.612  | 0.627  | 0.714 | 0.775 |
|              | 0.645      | 0.634  | 0.672  | 0.768 | 0.728 |
|              | 0.636      | 0.6223 | 0.633  | 0.718 | 0.745 |
|              | 0.637      | 0.621  | 0.624  | 0.735 | 0.764 |
| c-Jun S63    | 0.034      | 0.049  | 0.052  | 0.057 | 0.074 |
|              | 0.036      | 0.05   | 0.049  | 0.065 | 0.072 |
|              | 0.064      | 0.053  | 0.051  | 0.049 | 0.071 |
|              | 0.051      | 0.064  | 0.057  | 0.059 | 0.085 |
|              | PPP1CA sh4 |        |        |       |       |
| PDGFRb Y771  | 0.277      | 0.29   | 0.297  | 0.295 | 0.298 |
|              | 0.276      | 0.309  | 0.306  | 0.303 | 0.329 |
|              | 0.288      | 0.294  | 0.295  | 0.297 | 0.327 |

|               |        |        |        |       |       |
|---------------|--------|--------|--------|-------|-------|
|               | 0.304  | 0.319  | 0.312  | 0.315 | 0.329 |
| SHC Y317      | 0.399  | 0.474  | 0.505  | 0.511 | 0.544 |
|               | 0.39   | 0.469  | 0.515  | 0.474 | 0.555 |
|               | 0.407  | 0.481  | 0.486  | 0.515 | 0.576 |
|               | 0.413  | 0.467  | 0.522  | 0.541 | 0.571 |
| c-Cbl Y774    | 0.3647 | 0.358  | 0.352  | 0.36  | 0.366 |
|               | 0.361  | 0.375  | 0.364  | 0.358 | 0.384 |
|               | 0.364  | 0.359  | 0.342  | 0.357 | 0.363 |
|               | 0.369  | 0.367  | 0.349  | 0.349 | 0.364 |
| Paxillin Y118 | 0.682  | 0.713  | 0.643  | 0.653 | 0.655 |
|               | 0.676  | 0.741  | 0.701  | 0.646 | 0.742 |
|               | 0.665  | 0.703  | 0.626  | 0.626 | 0.644 |
|               | 0.743  | 0.765  | 0.656  | 0.629 | 0.666 |
| AKT S473      | 0.496  | 0.365  | 0.441  | 0.565 | 0.646 |
|               | 0.468  | 0.425  | 0.527  | 0.476 | 0.64  |
|               | 0.454  | 0.4    | 0.432  | 0.509 | 0.573 |
|               | 0.466  | 0.45   | 0.513  | 0.558 | 0.593 |
| GSK-3a/b S21  | 0.473  | 0.467  | 0.447  | 0.526 | 0.537 |
|               | 0.4677 | 0.463  | 0.487  | 0.469 | 0.471 |
|               | 0.461  | 0.467  | 0.4677 | 0.49  | 0.51  |
|               | 0.469  | 0.463  | 0.469  | 0.498 | 0.434 |
| RPS6 S235/S2  | 0.23   | 0.174  | 0.159  | 0.26  | 0.325 |
|               | 0.187  | 0.172  | 0.194  | 0.206 | 0.352 |
|               | 0.225  | 0.188  | 0.171  | 0.23  | 0.29  |
|               | 0.231  | 0.187  | 0.228  | 0.218 | 0.312 |
| RPS6 S240/S2  | 0.152  | 0.106  | 0.096  | 0.189 | 0.214 |
|               | 0.132  | 0.111  | 0.139  | 0.186 | 0.232 |
|               | 0.176  | 0.15   | 0.146  | 0.208 | 0.202 |
|               | 0.18   | 0.16   | 0.187  | 0.244 | 0.221 |
| PKCb S660     | 0.603  | 0.623  | 0.585  | 0.842 | 1.082 |
|               | 0.6137 | 0.623  | 0.62   | 0.729 | 1.053 |
|               | 0.613  | 0.6207 | 0.587  | 0.812 | 1.087 |
|               | 0.625  | 0.616  | 0.623  | 0.793 | 1.192 |
| PKCd S643     | 0.639  | 0.634  | 0.575  | 0.62  | 0.682 |
|               | 0.6413 | 0.63   | 0.596  | 0.608 | 0.698 |
|               | 0.648  | 0.637  | 0.575  | 0.627 | 0.683 |
|               | 0.637  | 0.63   | 0.597  | 0.628 | 0.705 |
| MARCKs S512,  | 0.651  | 0.709  | 0.712  | 0.756 | 0.689 |
|               | 0.584  | 0.697  | 0.719  | 0.72  | 0.704 |

|              |       |       |       |       |       |
|--------------|-------|-------|-------|-------|-------|
|              | 0.657 | 0.736 | 0.719 | 0.715 | 0.67  |
|              | 0.712 | 0.635 | 0.726 | 0.699 | 0.746 |
| CAMI S81     | 0.624 | 0.571 | 0.547 | 0.632 | 0.57  |
|              | 0.618 | 0.614 | 0.578 | 0.625 | 0.634 |
|              | 0.616 | 0.576 | 0.485 | 0.603 | 0.574 |
|              | 0.643 | 0.584 | 0.525 | 0.632 | 0.716 |
| RSK3 T356/S3 | 0.647 | 0.597 | 0.588 | 0.705 | 0.814 |
|              | 0.621 | 0.596 | 0.631 | 0.67  | 0.859 |
|              | 0.672 | 0.604 | 0.567 | 0.695 | 0.835 |
|              | 0.658 | 0.605 | 0.624 | 0.727 | 0.89  |
| RAF S289/S29 | 0.17  | 0.168 | 0.171 | 0.195 | 0.169 |
|              | 0.165 | 0.182 | 0.19  | 0.186 | 0.191 |
|              | 0.174 | 0.172 | 0.166 | 0.173 | 0.163 |
|              | 0.188 | 0.171 | 0.177 | 0.18  | 0.185 |
| MEK S217/S2  | 0.165 | 0.178 | 0.215 | 0.485 | 0.888 |
|              | 0.176 | 0.174 | 0.236 | 0.454 | 0.911 |
|              | 0.16  | 0.178 | 0.189 | 0.404 | 0.788 |
|              | 0.177 | 0.173 | 0.194 | 0.388 | 0.94  |
| ERK T202/Y20 | 0.336 | 0.291 | 0.371 | 0.601 | 0.904 |
|              | 0.318 | 0.301 | 0.393 | 0.614 | 0.882 |
|              | 0.319 | 0.286 | 0.333 | 0.538 | 0.803 |
|              | 0.328 | 0.291 | 0.339 | 0.659 | 0.906 |
| p90RSK S380  | 0.687 | 0.241 | 0.241 | 0.215 | 0.442 |
|              | 0.62  | 0.22  | 0.242 | 0.23  | 0.336 |
|              | 0.676 | 0.261 | 0.259 | 0.226 | 0.392 |
|              | 0.628 | 0.258 | 0.247 | 0.23  | 0.339 |
| STAT1 Y701   | 0.376 | 0.421 | 0.377 | 0.442 | 0.46  |
|              | 0.36  | 0.418 | 0.394 | 0.413 | 0.477 |
|              | 0.384 | 0.412 | 0.357 | 0.442 | 0.466 |
|              | 0.408 | 0.424 | 0.396 | 0.442 | 0.463 |
| STAT3 Y705   | 0.597 | 0.623 | 0.602 | 0.593 | 0.587 |
|              | 0.581 | 0.625 | 0.608 | 0.565 | 0.589 |
|              | 0.618 | 0.636 | 0.611 | 0.597 | 0.588 |
|              | 0.604 | 0.618 | 0.618 | 0.598 | 0.586 |
| CREB S133    | 0.542 | 0.584 | 0.573 | 0.692 | 0.825 |
|              | 0.529 | 0.648 | 0.655 | 0.698 | 0.882 |
|              | 0.582 | 0.678 | 0.584 | 0.735 | 0.815 |
|              | 0.623 | 0.54  | 0.583 | 0.723 | 0.912 |
| NF-kB S536   | 0.621 | 0.641 | 0.671 | 0.988 | 1.19  |

|               |            |       |       |       |       |
|---------------|------------|-------|-------|-------|-------|
|               | 0.605      | 0.695 | 0.737 | 0.831 | 1.13  |
|               | 0.638      | 0.684 | 0.668 | 0.934 | 1.065 |
|               | 0.638      | 0.642 | 0.666 | 0.854 | 1.085 |
| c-Jun S63     | 0.051      | 0.052 | 0.034 | 0.044 | 0.051 |
|               | 0.0527     | 0.047 | 0.047 | 0.039 | 0.048 |
|               | 0.056      | 0.051 | 0.04  | 0.047 | 0.048 |
|               | 0.051      | 0.052 | 0.045 | 0.047 | 0.055 |
|               | PPP1CA sh5 |       |       |       |       |
| PDGFRb Y771   | 0.273      | 0.278 | 0.28  | 0.285 | 0.323 |
|               | 0.262      | 0.288 | 0.276 | 0.276 | 0.327 |
|               | 0.296      | 0.275 | 0.27  | 0.296 | 0.31  |
|               | 0.297      | 0.292 | 0.292 | 0.296 | 0.321 |
| SHC Y317      | 0.402      | 0.44  | 0.471 | 0.528 | 0.497 |
|               | 0.385      | 0.468 | 0.488 | 0.476 | 0.499 |
|               | 0.394      | 0.448 | 0.451 | 0.497 | 0.483 |
|               | 0.402      | 0.439 | 0.475 | 0.492 | 0.486 |
| c-Cbl Y774    | 0.366      | 0.403 | 0.392 | 0.402 | 0.385 |
|               | 0.365      | 0.397 | 0.385 | 0.398 | 0.388 |
|               | 0.365      | 0.37  | 0.376 | 0.391 | 0.376 |
|               | 0.364      | 0.376 | 0.407 | 0.41  | 0.387 |
| Paxillin Y118 | 0.651      | 0.655 | 0.678 | 0.692 | 0.681 |
|               | 0.629      | 0.679 | 0.651 | 0.684 | 0.692 |
|               | 0.692      | 0.658 | 0.642 | 0.714 | 0.686 |
|               | 0.694      | 0.702 | 0.697 | 0.724 | 0.716 |
| AKT S473      | 0.552      | 0.56  | 0.596 | 0.602 | 0.724 |
|               | 0.5677     | 0.537 | 0.603 | 0.599 | 0.738 |
|               | 0.586      | 0.558 | 0.567 | 0.659 | 0.668 |
|               | 0.565      | 0.572 | 0.618 | 0.571 | 0.718 |
| GSK-3a/b S21  | 0.663      | 0.652 | 0.556 | 0.618 | 0.708 |
|               | 0.55       | 0.543 | 0.587 | 0.506 | 0.7   |
|               | 0.58       | 0.538 | 0.641 | 0.585 | 0.67  |
|               | 0.554      | 0.526 | 0.567 | 0.601 | 0.693 |
| RPS6 S235/S2  | 0.259      | 0.234 | 0.198 | 0.322 | 0.374 |
|               | 0.189      | 0.209 | 0.286 | 0.222 | 0.395 |
|               | 0.307      | 0.249 | 0.237 | 0.284 | 0.36  |
|               | 0.284      | 0.264 | 0.308 | 0.286 | 0.436 |
| RPS6 S240/S2  | 0.185      | 0.15  | 0.115 | 0.216 | 0.238 |

|              |        |       |        |        |       |
|--------------|--------|-------|--------|--------|-------|
|              | 0.145  | 0.132 | 0.189  | 0.155  | 0.218 |
|              | 0.198  | 0.172 | 0.161  | 0.218  | 0.249 |
|              | 0.177  | 0.17  | 0.182  | 0.217  | 0.262 |
| PKCb S660    | 0.66   | 0.635 | 0.636  | 0.82   | 1.104 |
|              | 0.572  | 0.635 | 0.655  | 0.696  | 1.158 |
|              | 0.622  | 0.594 | 0.564  | 0.674  | 0.967 |
|              | 0.626  | 0.59  | 0.594  | 0.706  | 1.004 |
| PKCd S643    | 0.583  | 0.625 | 0.652  | 0.647  | 0.629 |
|              | 0.579  | 0.635 | 0.647  | 0.63   | 0.64  |
|              | 0.577  | 0.598 | 0.601  | 0.615  | 0.601 |
|              | 0.586  | 0.6   | 0.621  | 0.613  | 0.615 |
| MARCKs S512, | 0.583  | 0.671 | 0.724  | 0.729  | 0.731 |
|              | 0.484  | 0.69  | 0.727  | 0.7193 | 0.71  |
|              | 0.625  | 0.649 | 0.639  | 0.706  | 0.727 |
|              | 0.657  | 0.593 | 0.728  | 0.723  | 0.731 |
| CAMI S81     | 0.498  | 0.559 | 0.533  | 0.552  | 0.603 |
|              | 0.467  | 0.585 | 0.537  | 0.533  | 0.599 |
|              | 0.566  | 0.594 | 0.525  | 0.546  | 0.593 |
|              | 0.568  | 0.605 | 0.58   | 0.569  | 0.628 |
| RSK3 T356/S3 | 0.58   | 0.608 | 0.571  | 0.692  | 0.706 |
|              | 0.596  | 0.612 | 0.586  | 0.657  | 0.731 |
|              | 0.607  | 0.617 | 0.568  | 0.703  | 0.715 |
|              | 0.601  | 0.643 | 0.604  | 0.711  | 0.751 |
| RAF S289/S29 | 0.17   | 0.171 | 0.169  | 0.178  | 0.181 |
|              | 0.161  | 0.189 | 0.164  | 0.169  | 0.181 |
|              | 0.178  | 0.171 | 0.1677 | 0.17   | 0.174 |
|              | 0.1697 | 0.178 | 0.17   | 0.173  | 0.178 |
| MEK S217/S2: | 0.166  | 0.167 | 0.252  | 0.507  | 0.903 |
|              | 0.18   | 0.172 | 0.275  | 0.483  | 0.947 |
|              | 0.171  | 0.168 | 0.208  | 0.44   | 0.811 |
|              | 0.189  | 0.164 | 0.237  | 0.453  | 0.912 |
| ERK T202/Y20 | 0.363  | 0.348 | 0.432  | 0.889  | 0.997 |
|              | 0.34   | 0.345 | 0.458  | 0.707  | 1.091 |
|              | 0.359  | 0.334 | 0.37   | 0.773  | 0.965 |
|              | 0.355  | 0.335 | 0.407  | 0.816  | 1.029 |
| p90RSK S380  | 0.618  | 0.239 | 0.236  | 0.248  | 0.41  |
|              | 0.585  | 0.208 | 0.244  | 0.248  | 0.338 |
|              | 0.659  | 0.264 | 0.236  | 0.23   | 0.358 |
|              | 0.64   | 0.255 | 0.235  | 0.242  | 0.368 |

|                          |        |       |       |       |       |
|--------------------------|--------|-------|-------|-------|-------|
| STAT1 Y701               | 0.367  | 0.387 | 0.392 | 0.407 | 0.423 |
|                          | 0.3783 | 0.393 | 0.396 | 0.395 | 0.436 |
|                          | 0.38   | 0.38  | 0.376 | 0.395 | 0.408 |
|                          | 0.388  | 0.379 | 0.386 | 0.394 | 0.421 |
| STAT3 Y705               | 0.526  | 0.564 | 0.564 | 0.581 | 0.576 |
|                          | 0.498  | 0.57  | 0.536 | 0.578 | 0.594 |
|                          | 0.545  | 0.546 | 0.541 | 0.556 | 0.57  |
|                          | 0.537  | 0.554 | 0.55  | 0.556 | 0.56  |
| CREB S133                | 0.507  | 0.514 | 0.58  | 0.624 | 0.782 |
|                          | 0.471  | 0.56  | 0.624 | 0.589 | 0.774 |
|                          | 0.509  | 0.526 | 0.533 | 0.59  | 0.702 |
|                          | 0.525  | 0.433 | 0.584 | 0.63  | 0.768 |
| NF-kB S536               | 0.617  | 0.637 | 0.643 | 0.832 | 0.949 |
|                          | 0.6163 | 0.632 | 0.68  | 0.685 | 0.975 |
|                          | 0.621  | 0.62  | 0.614 | 0.766 | 0.9   |
|                          | 0.611  | 0.604 | 0.626 | 0.778 | 0.929 |
| c-Jun S63                | 0.049  | 0.064 | 0.047 | 0.05  | 0.063 |
|                          | 0.063  | 0.07  | 0.065 | 0.044 | 0.07  |
|                          | 0.07   | 0.065 | 0.046 | 0.049 | 0.053 |
|                          | 0.07   | 0.073 | 0.069 | 0.058 | 0.071 |
| PP2CA sh4<br>PDGFRb Y771 | 0.301  | 0.311 | 0.338 | 0.36  | 0.337 |
|                          | 0.292  | 0.289 | 0.303 | 0.323 | 0.309 |
|                          | 0.33   | 0.31  | 0.346 | 0.346 | 0.356 |
|                          | 0.327  | 0.304 | 0.314 | 0.338 | 0.347 |
| SHC Y317                 | 0.476  | 0.501 | 0.561 | 0.57  | 0.579 |
|                          | 0.475  | 0.474 | 0.497 | 0.529 | 0.548 |
|                          | 0.522  | 0.531 | 0.562 | 0.556 | 0.586 |
|                          | 0.515  | 0.503 | 0.547 | 0.553 | 0.576 |
| c-Cbl Y774               | 0.408  | 0.421 | 0.428 | 0.452 | 0.423 |
|                          | 0.415  | 0.405 | 0.421 | 0.431 | 0.422 |
|                          | 0.452  | 0.433 | 0.44  | 0.448 | 0.433 |
|                          | 0.465  | 0.443 | 0.453 | 0.461 | 0.465 |
| Paxillin Y118            | 0.713  | 0.633 | 0.699 | 0.702 | 0.679 |
|                          | 0.605  | 0.61  | 0.645 | 0.623 | 0.635 |
|                          | 0.701  | 0.677 | 0.691 | 0.683 | 0.664 |
|                          | 0.736  | 0.696 | 0.694 | 0.704 | 0.719 |

|              |       |       |       |        |       |
|--------------|-------|-------|-------|--------|-------|
| AKT S473     | 0.438 | 0.459 | 0.521 | 0.611  | 0.701 |
|              | 0.476 | 0.519 | 0.503 | 0.559  | 0.649 |
|              | 0.552 | 0.522 | 0.587 | 0.683  | 0.7   |
|              | 0.545 | 0.506 | 0.588 | 0.645  | 0.674 |
| GSK-3a/b S21 | 0.573 | 0.548 | 0.603 | 0.687  | 0.744 |
|              | 0.633 | 0.497 | 0.598 | 0.706  | 0.752 |
|              | 0.735 | 0.734 | 0.665 | 0.652  | 0.735 |
|              | 0.667 | 0.58  | 0.557 | 0.601  | 0.709 |
| RPS6 S235/S2 | 0.164 | 0.184 | 0.23  | 0.24   | 0.256 |
|              | 0.15  | 0.196 | 0.228 | 0.263  | 0.298 |
|              | 0.174 | 0.224 | 0.181 | 0.237  | 0.351 |
|              | 0.168 | 0.158 | 0.259 | 0.226  | 0.306 |
| RPS6 S240/S2 | 0.089 | 0.198 | 0.191 | 0.218  | 0.158 |
|              | 0.18  | 0.2   | 0.18  | 0.209  | 0.166 |
|              | 0.141 | 0.172 | 0.132 | 0.191  | 0.185 |
|              | 0.144 | 0.142 | 0.234 | 0.257  | 0.19  |
| PKCb S660    | 0.636 | 0.642 | 0.644 | 0.759  | 0.975 |
|              | 0.65  | 0.628 | 0.634 | 0.743  | 0.957 |
|              | 0.7   | 0.715 | 0.72  | 0.82   | 1.158 |
|              | 0.665 | 0.666 | 0.701 | 0.718  | 1.03  |
| PKCd S643    | 0.684 | 0.766 | 0.756 | 0.759  | 0.735 |
|              | 0.69  | 0.718 | 0.704 | 0.703  | 0.725 |
|              | 0.703 | 0.793 | 0.748 | 0.754  | 0.744 |
|              | 0.73  | 0.791 | 0.77  | 0.767  | 0.779 |
| MARCKs S512, | 0.669 | 0.576 | 0.721 | 0.742  | 0.725 |
|              | 0.571 | 0.569 | 0.653 | 0.688  | 0.732 |
|              | 0.656 | 0.641 | 0.669 | 0.701  | 0.675 |
|              | 0.634 | 0.631 | 0.689 | 0.709  | 0.692 |
| CAMI S81     | 0.55  | 0.524 | 0.439 | 0.486  | 0.505 |
|              | 0.531 | 0.469 | 0.486 | 0.481  | 0.433 |
|              | 0.563 | 0.527 | 0.517 | 0.536  | 0.538 |
|              | 0.529 | 0.489 | 0.502 | 0.557  | 0.567 |
| RSK3 T356/S3 | 0.594 | 0.599 | 0.685 | 0.68   | 0.867 |
|              | 0.558 | 0.576 | 0.634 | 0.657  | 0.89  |
|              | 0.637 | 0.607 | 0.648 | 0.664  | 0.846 |
|              | 0.603 | 0.615 | 0.672 | 0.663  | 0.891 |
| RAF S289/S29 | 0.207 | 0.18  | 0.2   | 0.2    | 0.2   |
|              | 0.194 | 0.172 | 0.197 | 0.192  | 0.204 |
|              | 0.214 | 0.187 | 0.199 | 0.201  | 0.207 |
|              | 0.223 | 0.173 | 0.197 | 0.1977 | 0.219 |

|              |           |       |       |       |       |
|--------------|-----------|-------|-------|-------|-------|
| MEK S217/S22 | 0.155     | 0.188 | 0.412 | 0.495 | 1.053 |
|              | 0.159     | 0.178 | 0.391 | 0.468 | 0.947 |
|              | 0.186     | 0.202 | 0.424 | 0.504 | 1.072 |
|              | 0.19      | 0.2   | 0.438 | 0.495 | 0.987 |
| ERK T202/Y20 | 0.357     | 0.38  | 0.644 | 0.795 | 1.034 |
|              | 0.372     | 0.376 | 0.636 | 0.784 | 1.078 |
|              | 0.392     | 0.367 | 0.672 | 0.863 | 1.206 |
|              | 0.397     | 0.38  | 0.714 | 0.855 | 1.411 |
| p90RSK S380  | 0.091     | 0.278 | 0.258 | 0.308 | 0.113 |
|              | 0.454     | 0.289 | 0.279 | 0.33  | 0.386 |
|              | 0.124     | 0.218 | 0.307 | 0.339 | 0.432 |
|              | 0.405     | 0.304 | 0.318 | 0.333 | 0.349 |
| STAT1 Y701   | 0.379     | 0.415 | 0.444 | 0.43  | 0.413 |
|              | 0.395     | 0.369 | 0.41  | 0.405 | 0.421 |
|              | 0.403     | 0.424 | 0.438 | 0.428 | 0.443 |
|              | 0.391     | 0.4   | 0.423 | 0.439 | 0.427 |
| STAT3 Y705   | 0.606     | 0.612 | 0.687 | 0.643 | 0.6   |
|              | 0.594     | 0.575 | 0.638 | 0.624 | 0.577 |
|              | 0.6103    | 0.618 | 0.68  | 0.642 | 0.616 |
|              | 0.631     | 0.602 | 0.676 | 0.629 | 0.608 |
| CREB S133    | 0.589     | 0.547 | 0.779 | 0.799 | 0.929 |
|              | 0.601     | 0.536 | 0.706 | 0.771 | 0.906 |
|              | 0.716     | 0.664 | 0.838 | 0.97  | 1.038 |
|              | 0.673     | 0.684 | 0.806 | 0.878 | 1.015 |
| NF-kB S536   | 0.746     | 0.767 | 0.841 | 0.899 | 1.049 |
|              | 0.785     | 0.755 | 0.857 | 0.956 | 1.094 |
|              | 0.824     | 0.815 | 0.897 | 0.966 | 1.192 |
|              | 0.841     | 0.812 | 0.917 | 0.915 | 1.122 |
| c-Jun S63    | 0.039     | 0.048 | 0.057 | 0.06  | 0.061 |
|              | 0.051     | 0.047 | 0.062 | 0.055 | 0.07  |
|              | 0.061     | 0.068 | 0.058 | 0.061 | 0.068 |
|              | 0.064     | 0.066 | 0.06  | 0.056 | 0.075 |
| PDGFRb Y771  | PP2CA sh5 |       |       |       |       |
|              | 0.281     | 0.31  | 0.317 | 0.293 | 0.292 |
|              | 0.285     | 0.317 | 0.285 | 0.321 | 0.303 |
|              | 0.286     | 0.293 | 0.285 | 0.287 | 0.291 |
|              | 0.288     | 0.318 | 0.292 | 0.303 | 0.296 |

|               |       |       |       |        |       |
|---------------|-------|-------|-------|--------|-------|
| SHC Y317      | 0.403 | 0.451 | 0.492 | 0.485  | 0.467 |
|               | 0.415 | 0.458 | 0.465 | 0.52   | 0.499 |
|               | 0.411 | 0.438 | 0.457 | 0.467  | 0.478 |
|               | 0.405 | 0.451 | 0.462 | 0.502  | 0.47  |
| c-Cbl Y774    | 0.37  | 0.377 | 0.385 | 0.376  | 0.365 |
|               | 0.365 | 0.384 | 0.366 | 0.393  | 0.372 |
|               | 0.382 | 0.394 | 0.381 | 0.4    | 0.377 |
|               | 0.384 | 0.396 | 0.38  | 0.409  | 0.397 |
| Paxillin Y118 | 0.668 | 0.717 | 0.691 | 0.679  | 0.667 |
|               | 0.663 | 0.717 | 0.669 | 0.686  | 0.69  |
|               | 0.66  | 0.71  | 0.692 | 0.676  | 0.683 |
|               | 0.712 | 0.72  | 0.678 | 0.675  | 0.68  |
| AKT S473      | 0.503 | 0.484 | 0.545 | 0.57   | 0.571 |
|               | 0.486 | 0.486 | 0.545 | 0.545  | 0.573 |
|               | 0.499 | 0.506 | 0.529 | 0.561  | 0.606 |
|               | 0.524 | 0.518 | 0.517 | 0.5587 | 0.592 |
| GSK-3a/b S21  | 0.498 | 0.525 | 0.569 | 0.551  | 0.604 |
|               | 0.526 | 0.51  | 0.514 | 0.526  | 0.559 |
|               | 0.539 | 0.516 | 0.496 | 0.53   | 0.537 |
|               | 0.56  | 0.564 | 0.55  | 0.482  | 0.521 |
| RPS6 S235/S2  | 0.113 | 0.092 | 0.136 | 0.165  | 0.26  |
|               | 0.106 | 0.086 | 0.092 | 0.18   | 0.23  |
|               | 0.129 | 0.117 | 0.149 | 0.192  | 0.249 |
|               | 0.132 | 0.131 | 0.124 | 0.199  | 0.289 |
| RPS6 S240/S2  | 0.164 | 0.125 | 0.166 | 0.266  | 0.273 |
|               | 0.141 | 0.115 | 0.125 | 0.241  | 0.221 |
|               | 0.183 | 0.154 | 0.195 | 0.301  | 0.304 |
|               | 0.178 | 0.172 | 0.17  | 0.279  | 0.304 |
| PKCb S660     | 0.589 | 0.61  | 0.624 | 0.711  | 1.057 |
|               | 0.646 | 0.622 | 0.58  | 0.759  | 1.084 |
|               | 0.624 | 0.58  | 0.561 | 0.586  | 1.01  |
|               | 0.61  | 0.573 | 0.557 | 0.664  | 0.97  |
| PKCd S643     | 0.626 | 0.698 | 0.708 | 0.65   | 0.655 |
|               | 0.637 | 0.716 | 0.683 | 0.692  | 0.684 |
|               | 0.641 | 0.678 | 0.65  | 0.627  | 0.638 |
|               | 0.651 | 0.69  | 0.666 | 0.662  | 0.645 |
| MARCKs S512,  | 0.593 | 0.658 | 0.672 | 0.602  | 0.632 |
|               | 0.582 | 0.672 | 0.63  | 0.7    | 0.682 |
|               | 0.608 | 0.656 | 0.626 | 0.614  | 0.7   |

|              |       |        |       |        |       |
|--------------|-------|--------|-------|--------|-------|
|              | 0.62  | 0.685  | 0.63  | 0.664  | 0.673 |
| CAMI S81     | 0.543 | 0.555  | 0.571 | 0.521  | 0.517 |
|              | 0.553 | 0.592  | 0.545 | 0.5363 | 0.55  |
|              | 0.527 | 0.538  | 0.495 | 0.535  | 0.534 |
|              | 0.583 | 0.568  | 0.51  | 0.553  | 0.535 |
| RSK3 T356/S3 | 0.552 | 0.575  | 0.588 | 0.576  | 0.678 |
|              | 0.559 | 0.591  | 0.557 | 0.647  | 0.749 |
|              | 0.556 | 0.58   | 0.561 | 0.589  | 0.703 |
|              | 0.582 | 0.609  | 0.561 | 0.651  | 0.759 |
| RAF S289/S29 | 0.172 | 0.174  | 0.187 | 0.165  | 0.18  |
|              | 0.176 | 0.177  | 0.177 | 0.176  | 0.187 |
|              | 0.179 | 0.174  | 0.182 | 0.171  | 0.188 |
|              | 0.181 | 0.18   | 0.182 | 0.179  | 0.189 |
| MEK S217/S2  | 0.165 | 0.183  | 0.224 | 0.449  | 0.56  |
|              | 0.193 | 0.183  | 0.196 | 0.547  | 0.659 |
|              | 0.173 | 0.175  | 0.178 | 0.395  | 0.63  |
|              | 0.193 | 0.175  | 0.177 | 0.481  | 0.609 |
| ERK T202/Y20 | 0.355 | 0.368  | 0.463 | 0.761  | 1.023 |
|              | 0.354 | 0.375  | 0.409 | 0.879  | 1.088 |
|              | 0.399 | 0.376  | 0.4   | 0.721  | 1.101 |
|              | 0.4   | 0.378  | 0.397 | 0.836  | 1.09  |
| p90RSK S380  | 0.523 | 0.248  | 0.249 | 0.285  | 0.342 |
|              | 0.549 | 0.25   | 0.264 | 0.215  | 0.386 |
|              | 0.558 | 0.249  | 0.234 | 0.239  | 0.318 |
|              | 0.573 | 0.259  | 0.236 | 0.215  | 0.375 |
| STAT1 Y701   | 0.395 | 0.387  | 0.409 | 0.398  | 0.42  |
|              | 0.394 | 0.388  | 0.398 | 0.437  | 0.462 |
|              | 0.404 | 0.393  | 0.412 | 0.404  | 0.443 |
|              | 0.403 | 0.399  | 0.411 | 0.422  | 0.446 |
| STAT3 Y705   | 0.596 | 0.6    | 0.615 | 0.576  | 0.534 |
|              | 0.601 | 0.593  | 0.584 | 0.622  | 0.587 |
|              | 0.607 | 0.584  | 0.584 | 0.565  | 0.542 |
|              | 0.609 | 0.59   | 0.586 | 0.605  | 0.533 |
| CREB S133    | 0.542 | 0.5337 | 0.566 | 0.625  | 0.701 |
|              | 0.535 | 0.576  | 0.545 | 0.732  | 0.778 |
|              | 0.522 | 0.493  | 0.517 | 0.583  | 0.712 |
|              | 0.541 | 0.532  | 0.483 | 0.642  | 0.724 |
| NF-kB S536   | 0.622 | 0.636  | 0.646 | 0.686  | 0.695 |
|              | 0.618 | 0.649  | 0.597 | 0.783  | 0.715 |

|               |           |       |        |        |       |
|---------------|-----------|-------|--------|--------|-------|
|               | 0.624     | 0.637 | 0.615  | 0.658  | 0.738 |
|               | 0.63      | 0.657 | 0.6    | 0.749  | 0.702 |
| c-Jun S63     | 0.039     | 0.057 | 0.039  | 0.037  | 0.039 |
|               | 0.037     | 0.044 | 0.036  | 0.039  | 0.041 |
|               | 0.054     | 0.057 | 0.05   | 0.046  | 0.048 |
|               | 0.057     | 0.062 | 0.052  | 0.047  | 0.05  |
|               | PPCA pool |       |        |        |       |
| PDGFRb Y771   | 0.279     | 0.276 | 0.308  | 0.298  | 0.298 |
|               | 0.279     | 0.293 | 0.271  | 0.3037 | 0.309 |
|               | 0.3       | 0.298 | 0.29   | 0.304  | 0.307 |
|               | 0.29      | 0.294 | 0.304  | 0.309  | 0.317 |
| SHC Y317      | 0.408     | 0.462 | 0.478  | 0.471  | 0.505 |
|               | 0.409     | 0.477 | 0.449  | 0.425  | 0.515 |
|               | 0.419     | 0.487 | 0.482  | 0.502  | 0.521 |
|               | 0.413     | 0.472 | 0.485  | 0.503  | 0.553 |
| c-Cbl Y774    | 0.39      | 0.428 | 0.402  | 0.398  | 0.394 |
|               | 0.373     | 0.425 | 0.381  | 0.3903 | 0.412 |
|               | 0.387     | 0.426 | 0.3915 | 0.394  | 0.401 |
|               | 0.405     | 0.418 | 0.3915 | 0.379  | 0.413 |
| Paxillin Y118 | 0.741     | 0.723 | 0.689  | 0.691  | 0.719 |
|               | 0.714     | 0.73  | 0.689  | 0.66   | 0.726 |
|               | 0.744     | 0.723 | 0.681  | 0.725  | 0.732 |
|               | 0.759     | 0.73  | 0.693  | 0.723  | 0.74  |
| AKT S473      | 0.577     | 0.551 | 0.492  | 0.547  | 0.703 |
|               | 0.479     | 0.5   | 0.524  | 0.481  | 0.712 |
|               | 0.537     | 0.535 | 0.519  | 0.48   | 0.647 |
|               | 0.562     | 0.524 | 0.52   | 0.438  | 0.673 |
| GSK-3a/b S21  | 0.552     | 0.516 | 0.573  | 0.522  | 0.479 |
|               | 0.51      | 0.48  | 0.498  | 0.456  | 0.544 |
|               | 0.548     | 0.493 | 0.498  | 0.57   | 0.465 |
|               | 0.51      | 0.464 | 0.506  | 0.555  | 0.49  |
| RPS6 S235/S2  | 0.092     | 0.076 | 0.095  | 0.136  | 0.231 |
|               | 0.104     | 0.078 | 0.086  | 0.145  | 0.282 |
|               | 0.101     | 0.087 | 0.109  | 0.137  | 0.201 |
|               | 0.105     | 0.094 | 0.104  | 0.126  | 0.222 |
| RPS6 S240/S2  | 0.085     | 0.07  | 0.087  | 0.129  | 0.146 |
|               | 0.101     | 0.08  | 0.092  | 0.157  | 0.185 |

|              |       |       |       |        |       |
|--------------|-------|-------|-------|--------|-------|
|              | 0.095 | 0.082 | 0.089 | 0.118  | 0.139 |
|              | 0.092 | 0.089 | 0.094 | 0.114  | 0.15  |
| PKCb S660    | 0.554 | 0.565 | 0.599 | 0.71   | 0.906 |
|              | 0.547 | 0.568 | 0.578 | 0.633  | 0.959 |
|              | 0.573 | 0.584 | 0.595 | 0.722  | 0.928 |
|              | 0.559 | 0.579 | 0.583 | 0.671  | 0.925 |
| PKCd S643    | 0.634 | 0.611 | 0.67  | 0.611  | 0.629 |
|              | 0.62  | 0.624 | 0.648 | 0.6303 | 0.624 |
|              | 0.632 | 0.626 | 0.666 | 0.63   | 0.667 |
|              | 0.637 | 0.631 | 0.657 | 0.65   | 0.641 |
| MARCKs S512, | 0.717 | 0.752 | 0.76  | 0.76   | 0.75  |
|              | 0.674 | 0.751 | 0.687 | 0.577  | 0.748 |
|              | 0.705 | 0.737 | 0.661 | 0.749  | 0.762 |
|              | 0.706 | 0.733 | 0.66  | 0.743  | 0.764 |
| CAMI S81     | 0.533 | 0.54  | 0.532 | 0.539  | 0.525 |
|              | 0.509 | 0.55  | 0.482 | 0.5643 | 0.535 |
|              | 0.564 | 0.594 | 0.511 | 0.574  | 0.568 |
|              | 0.58  | 0.572 | 0.544 | 0.58   | 0.597 |
| RSK3 T356/S3 | 0.565 | 0.565 | 0.524 | 0.61   | 0.67  |
|              | 0.566 | 0.562 | 0.51  | 0.548  | 0.691 |
|              | 0.577 | 0.561 | 0.508 | 0.613  | 0.672 |
|              | 0.565 | 0.582 | 0.516 | 0.611  | 0.676 |
| RAF S289/S29 | 0.178 | 0.183 | 0.196 | 0.183  | 0.18  |
|              | 0.173 | 0.19  | 0.175 | 0.178  | 0.182 |
|              | 0.179 | 0.198 | 0.172 | 0.166  | 0.19  |
|              | 0.193 | 0.185 | 0.175 | 0.185  | 0.179 |
| MEK S217/S22 | 0.163 | 0.176 | 0.247 | 0.424  | 0.686 |
|              | 0.176 | 0.175 | 0.216 | 0.353  | 0.82  |
|              | 0.165 | 0.176 | 0.202 | 0.473  | 0.656 |
|              | 0.172 | 0.167 | 0.195 | 0.464  | 0.687 |
| ERK T202/Y20 | 0.397 | 0.368 | 0.463 | 0.764  | 0.976 |
|              | 0.368 | 0.371 | 0.442 | 0.619  | 1.125 |
|              | 0.387 | 0.358 | 0.41  | 0.72   | 0.939 |
|              | 0.363 | 0.363 | 0.405 | 0.706  | 0.801 |
| p90RSK S380  | 0.561 | 0.238 | 0.224 | 0.242  | 0.385 |
|              | 0.615 | 0.203 | 0.216 | 0.265  | 0.272 |
|              | 0.58  | 0.229 | 0.23  | 0.227  | 0.324 |
|              | 0.629 | 0.241 | 0.226 | 0.23   | 0.342 |
| STAT1 Y701   | 0.362 | 0.369 | 0.371 | 0.382  | 0.404 |

|               |           |        |        |       |        |
|---------------|-----------|--------|--------|-------|--------|
|               | 0.352     | 0.369  | 0.372  | 0.365 | 0.415  |
|               | 0.376     | 0.3753 | 0.362  | 0.405 | 0.433  |
|               | 0.364     | 0.388  | 0.3683 | 0.419 | 0.436  |
| STAT3 Y705    | 0.561     | 0.581  | 0.52   | 0.535 | 0.525  |
|               | 0.563     | 0.583  | 0.517  | 0.496 | 0.536  |
|               | 0.548     | 0.58   | 0.52   | 0.536 | 0.554  |
|               | 0.537     | 0.57   | 0.516  | 0.58  | 0.553  |
| CREB S133     | 0.485     | 0.493  | 0.62   | 0.761 | 0.699  |
|               | 0.492     | 0.533  | 0.605  | 0.563 | 0.745  |
|               | 0.515     | 0.531  | 0.607  | 0.681 | 0.759  |
|               | 0.495     | 0.493  | 0.597  | 0.681 | 0.776  |
| NF-kB S536    | 0.611     | 0.633  | 0.6413 | 0.732 | 0.716  |
|               | 0.586     | 0.626  | 0.653  | 0.595 | 0.711  |
|               | 0.638     | 0.646  | 0.645  | 0.645 | 0.688  |
|               | 0.657     | 0.635  | 0.626  | 0.666 | 0.651  |
| c-Jun S63     | 0.052     | 0.054  | 0.052  | 0.049 | 0.043  |
|               | 0.054     | 0.057  | 0.043  | 0.032 | 0.058  |
|               | 0.042     | 0.042  | 0.041  | 0.037 | 0.048  |
|               | 0.049     | 0.044  | 0.038  | 0.044 | 0.052  |
|               | PTPN1 sh1 |        |        |       |        |
| PDGFRb Y771   | 0.291     | 0.3    | 0.309  | 0.27  | 0.311  |
|               | 0.2997    | 0.306  | 0.302  | 0.243 | 0.319  |
|               | 0.303     | 0.318  | 0.318  | 0.278 | 0.297  |
|               | 0.305     | 0.321  | 0.28   | 0.31  | 0.305  |
| SHC Y317      | 0.414     | 0.508  | 0.482  | 0.523 | 0.49   |
|               | 0.346     | 0.525  | 0.481  | 0.438 | 0.509  |
|               | 0.41      | 0.505  | 0.496  | 0.53  | 0.484  |
|               | 0.416     | 0.508  | 0.436  | 0.547 | 0.509  |
| c-Cbl Y774    | 0.399     | 0.397  | 0.379  | 0.386 | 0.369  |
|               | 0.3987    | 0.4    | 0.395  | 0.35  | 0.38   |
|               | 0.39      | 0.409  | 0.403  | 0.385 | 0.363  |
|               | 0.407     | 0.426  | 0.3923 | 0.378 | 0.3707 |
| Paxillin Y118 | 0.731     | 0.723  | 0.663  | 0.652 | 0.676  |
|               | 0.691     | 0.708  | 0.699  | 0.578 | 0.69   |
|               | 0.655     | 0.66   | 0.69   | 0.64  | 0.626  |
|               | 0.687     | 0.739  | 0.577  | 0.712 | 0.652  |
| AKT S473      | 0.565     | 0.536  | 0.531  | 0.571 | 0.658  |

|              |        |       |        |        |       |
|--------------|--------|-------|--------|--------|-------|
|              | 0.5497 | 0.514 | 0.518  | 0.497  | 0.716 |
|              | 0.543  | 0.507 | 0.532  | 0.544  | 0.589 |
|              | 0.541  | 0.519 | 0.522  | 0.605  | 0.665 |
| GSK-3a/b S21 | 0.639  | 0.597 | 0.635  | 0.65   | 0.533 |
|              | 0.597  | 0.611 | 0.623  | 0.421  | 0.581 |
|              | 0.637  | 0.573 | 0.646  | 0.613  | 0.519 |
|              | 0.515  | 0.519 | 0.484  | 0.56   | 0.578 |
| RPS6 S235/S2 | 0.107  | 0.087 | 0.113  | 0.157  | 0.24  |
|              | 0.11   | 0.121 | 0.098  | 0.152  | 0.276 |
|              | 0.114  | 0.104 | 0.122  | 0.145  | 0.207 |
|              | 0.123  | 0.107 | 0.131  | 0.141  | 0.243 |
| RPS6 S240/S2 | 0.122  | 0.094 | 0.127  | 0.206  | 0.211 |
|              | 0.145  | 0.12  | 0.114  | 0.211  | 0.234 |
|              | 0.138  | 0.124 | 0.144  | 0.182  | 0.208 |
|              | 0.152  | 0.128 | 0.176  | 0.197  | 0.232 |
| PKCb S660    | 0.607  | 0.605 | 0.584  | 0.757  | 1.003 |
|              | 0.6053 | 0.61  | 0.585  | 0.633  | 1.063 |
|              | 0.603  | 0.58  | 0.57   | 0.718  | 0.956 |
|              | 0.606  | 0.605 | 0.496  | 0.72   | 0.984 |
| PKCd S643    | 0.663  | 0.623 | 0.61   | 0.618  | 0.623 |
|              | 0.576  | 0.654 | 0.61   | 0.6193 | 0.628 |
|              | 0.665  | 0.625 | 0.605  | 0.617  | 0.611 |
|              | 0.674  | 0.619 | 0.6083 | 0.623  | 0.618 |
| MARCKs S512, | 0.577  | 0.624 | 0.564  | 0.547  | 0.539 |
|              | 0.552  | 0.583 | 0.586  | 0.5733 | 0.548 |
|              | 0.518  | 0.57  | 0.618  | 0.558  | 0.551 |
|              | 0.561  | 0.623 | 0.484  | 0.615  | 0.594 |
| CAMI S81     | 0.587  | 0.58  | 0.514  | 0.532  | 0.666 |
|              | 0.453  | 0.599 | 0.681  | 0.536  | 0.747 |
|              | 0.692  | 0.736 | 0.713  | 0.707  | 0.549 |
|              | 0.642  | 0.789 | 0.605  | 0.622  | 0.612 |
| RSK3 T356/S3 | 0.584  | 0.576 | 0.547  | 0.588  | 0.672 |
|              | 0.5867 | 0.581 | 0.544  | 0.491  | 0.703 |
|              | 0.584  | 0.604 | 0.578  | 0.633  | 0.72  |
|              | 0.592  | 0.618 | 0.496  | 0.637  | 0.728 |
| RAF S289/S29 | 0.167  | 0.164 | 0.161  | 0.154  | 0.168 |
|              | 0.166  | 0.168 | 0.163  | 0.141  | 0.176 |
|              | 0.163  | 0.168 | 0.166  | 0.162  | 0.169 |
|              | 0.168  | 0.174 | 0.153  | 0.172  | 0.178 |

|              |           |       |       |       |       |
|--------------|-----------|-------|-------|-------|-------|
| MEK S217/S22 | 0.176     | 0.187 | 0.235 | 0.474 | 0.625 |
|              | 0.142     | 0.189 | 0.222 | 0.29  | 0.725 |
|              | 0.167     | 0.191 | 0.223 | 0.425 | 0.586 |
|              | 0.17      | 0.178 | 0.173 | 0.467 | 0.701 |
| ERK T202/Y20 | 0.372     | 0.357 | 0.437 | 0.708 | 0.979 |
|              | 0.3627    | 0.359 | 0.42  | 0.546 | 0.89  |
|              | 0.356     | 0.362 | 0.412 | 0.658 | 0.764 |
|              | 0.36      | 0.375 | 0.386 | 0.701 | 0.853 |
| p90RSK S380  | 0.45      | 0.259 | 0.219 | 0.226 | 0.312 |
|              | 0.54      | 0.186 | 0.225 | 0.242 | 0.219 |
|              | 0.526     | 0.254 | 0.246 | 0.221 | 0.323 |
|              | 0.555     | 0.262 | 0.254 | 0.204 | 0.294 |
| STAT1 Y701   | 0.391     | 0.406 | 0.4   | 0.402 | 0.476 |
|              | 0.344     | 0.416 | 0.395 | 0.365 | 0.485 |
|              | 0.361     | 0.392 | 0.411 | 0.387 | 0.423 |
|              | 0.379     | 0.401 | 0.402 | 0.391 | 0.458 |
| STAT3 Y705   | 0.569     | 0.546 | 0.547 | 0.554 | 0.568 |
|              | 0.498     | 0.561 | 0.536 | 0.525 | 0.573 |
|              | 0.528     | 0.537 | 0.538 | 0.543 | 0.558 |
|              | 0.528     | 0.554 | 0.522 | 0.552 | 0.553 |
| CREB S133    | 0.524     | 0.524 | 0.578 | 0.595 | 0.667 |
|              | 0.5133    | 0.577 | 0.595 | 0.467 | 0.724 |
|              | 0.5       | 0.516 | 0.608 | 0.638 | 0.691 |
|              | 0.516     | 0.55  | 0.476 | 0.655 | 0.745 |
| NF-kB S536   | 0.612     | 0.587 | 0.614 | 0.704 | 0.811 |
|              | 0.6       | 0.591 | 0.617 | 0.576 | 0.863 |
|              | 0.592     | 0.563 | 0.602 | 0.665 | 0.761 |
|              | 0.596     | 0.568 | 0.548 | 0.656 | 0.791 |
| c-Jun S63    | 0.06      | 0.052 | 0.047 | 0.044 | 0.052 |
|              | 0.053     | 0.067 | 0.044 | 0.026 | 0.074 |
|              | 0.044     | 0.062 | 0.049 | 0.045 | 0.057 |
|              | 0.055     | 0.066 | 0.039 | 0.057 | 0.07  |
| PDGFRb Y771  | PTPN1 sh5 |       |       |       |       |
|              | 0.309     | 0.307 | 0.311 | 0.3   | 0.311 |
|              | 0.311     | 0.3   | 0.304 | 0.297 | 0.314 |
|              | 0.313     | 0.298 | 0.298 | 0.287 | 0.303 |
|              | 0.302     | 0.29  | 0.308 | 0.298 | 0.307 |

|               |       |       |       |        |       |
|---------------|-------|-------|-------|--------|-------|
| SHC Y317      | 0.413 | 0.457 | 0.469 | 0.48   | 0.478 |
|               | 0.414 | 0.457 | 0.46  | 0.4797 | 0.498 |
|               | 0.386 | 0.429 | 0.447 | 0.478  | 0.474 |
|               | 0.393 | 0.439 | 0.463 | 0.481  | 0.482 |
| c-Cbl Y774    | 0.388 | 0.402 | 0.395 | 0.382  | 0.412 |
|               | 0.401 | 0.399 | 0.396 | 0.385  | 0.405 |
|               | 0.384 | 0.412 | 0.39  | 0.386  | 0.408 |
|               | 0.382 | 0.386 | 0.387 | 0.377  | 0.413 |
| Paxillin Y118 | 0.716 | 0.702 | 0.706 | 0.692  | 0.679 |
|               | 0.738 | 0.715 | 0.716 | 0.69   | 0.702 |
|               | 0.73  | 0.727 | 0.726 | 0.667  | 0.65  |
|               | 0.715 | 0.71  | 0.73  | 0.692  | 0.669 |
| AKT S473      | 0.471 | 0.472 | 0.538 | 0.592  | 0.561 |
|               | 0.465 | 0.471 | 0.566 | 0.631  | 0.683 |
|               | 0.491 | 0.486 | 0.566 | 0.596  | 0.658 |
|               | 0.513 | 0.468 | 0.565 | 0.631  | 0.575 |
| GSK-3a/b S21  | 0.524 | 0.541 | 0.544 | 0.592  | 0.65  |
|               | 0.511 | 0.562 | 0.534 | 0.632  | 0.68  |
|               | 0.518 | 0.525 | 0.532 | 0.593  | 0.567 |
|               | 0.562 | 0.537 | 0.541 | 0.599  | 0.662 |
| RPS6 S235/S2  | 0.124 | 0.111 | 0.123 | 0.155  | 0.197 |
|               | 0.114 | 0.096 | 0.097 | 0.149  | 0.2   |
|               | 0.118 | 0.115 | 0.11  | 0.144  | 0.218 |
|               | 0.127 | 0.115 | 0.12  | 0.152  | 0.246 |
| RPS6 S240/S2  | 0.165 | 0.124 | 0.151 | 0.2    | 0.212 |
|               | 0.129 | 0.109 | 0.123 | 0.2    | 0.203 |
|               | 0.149 | 0.139 | 0.153 | 0.194  | 0.207 |
|               | 0.168 | 0.143 | 0.168 | 0.22   | 0.247 |
| PKCb S660     | 0.606 | 0.6   | 0.58  | 0.714  | 0.928 |
|               | 0.6   | 0.601 | 0.559 | 0.752  | 0.939 |
|               | 0.57  | 0.534 | 0.574 | 0.721  | 0.902 |
|               | 0.561 | 0.586 | 0.566 | 0.716  | 0.944 |
| PKCd S643     | 0.664 | 0.666 | 0.664 | 0.65   | 0.622 |
|               | 0.671 | 0.668 | 0.663 | 0.672  | 0.629 |
|               | 0.647 | 0.634 | 0.63  | 0.617  | 0.591 |
|               | 0.628 | 0.624 | 0.641 | 0.64   | 0.6   |
| MARCKs S512,  | 0.582 | 0.646 | 0.555 | 0.551  | 0.614 |
|               | 0.62  | 0.684 | 0.554 | 0.619  | 0.614 |
|               | 0.607 | 0.663 | 0.591 | 0.612  | 0.608 |
|               | 0.614 | 0.669 | 0.592 | 0.624  | 0.622 |

|              |       |       |       |       |       |
|--------------|-------|-------|-------|-------|-------|
| CAMI S81     | 0.763 | 0.789 | 0.768 | 0.805 | 0.685 |
|              | 0.754 | 0.814 | 0.821 | 0.864 | 0.677 |
|              | 0.702 | 0.608 | 0.74  | 0.808 | 0.765 |
|              | 0.578 | 0.628 | 0.631 | 0.834 | 0.684 |
| RSK3 T356/S3 | 0.591 | 0.588 | 0.562 | 0.601 | 0.693 |
|              | 0.582 | 0.561 | 0.559 | 0.617 | 0.699 |
|              | 0.593 | 0.601 | 0.573 | 0.627 | 0.705 |
|              | 0.593 | 0.578 | 0.576 | 0.622 | 0.739 |
| RAF S289/S29 | 0.196 | 0.191 | 0.181 | 0.174 | 0.177 |
|              | 0.202 | 0.189 | 0.183 | 0.179 | 0.18  |
|              | 0.19  | 0.193 | 0.181 | 0.176 | 0.174 |
|              | 0.19  | 0.185 | 0.182 | 0.179 | 0.18  |
| MEK S217/S2  | 0.227 | 0.169 | 0.223 | 0.344 | 0.557 |
|              | 0.198 | 0.167 | 0.214 | 0.412 | 0.589 |
|              | 0.186 | 0.16  | 0.209 | 0.388 | 0.607 |
|              | 0.191 | 0.161 | 0.218 | 0.409 | 0.669 |
| ERK T202/Y20 | 0.419 | 0.423 | 0.469 | 0.666 | 0.924 |
|              | 0.401 | 0.414 | 0.449 | 0.767 | 0.969 |
|              | 0.404 | 0.4   | 0.425 | 0.663 | 0.927 |
|              | 0.39  | 0.397 | 0.415 | 0.684 | 0.972 |
| p90RSK S380  | 0.552 | 0.271 | 0.273 | 0.241 | 0.311 |
|              | 0.633 | 0.257 | 0.265 | 0.229 | 0.324 |
|              | 0.508 | 0.243 | 0.259 | 0.208 | 0.273 |
|              | 0.473 | 0.251 | 0.243 | 0.199 | 0.284 |
| STAT1 Y701   | 0.406 | 0.416 | 0.406 | 0.437 | 0.454 |
|              | 0.412 | 0.411 | 0.4   | 0.44  | 0.473 |
|              | 0.402 | 0.401 | 0.39  | 0.419 | 0.443 |
|              | 0.404 | 0.4   | 0.402 | 0.431 | 0.48  |
| STAT3 Y705   | 0.569 | 0.57  | 0.579 | 0.585 | 0.539 |
|              | 0.577 | 0.573 | 0.569 | 0.581 | 0.592 |
|              | 0.561 | 0.55  | 0.558 | 0.557 | 0.519 |
|              | 0.547 | 0.575 | 0.561 | 0.567 | 0.534 |
| CREB S133    | 0.57  | 0.57  | 0.595 | 0.632 | 0.757 |
|              | 0.614 | 0.642 | 0.577 | 0.704 | 0.749 |
|              | 0.487 | 0.491 | 0.537 | 0.619 | 0.683 |
|              | 0.485 | 0.54  | 0.497 | 0.616 | 0.712 |
| NF-kB S536   | 0.626 | 0.636 | 0.601 | 0.654 | 0.7   |
|              | 0.615 | 0.631 | 0.593 | 0.682 | 0.705 |
|              | 0.618 | 0.613 | 0.605 | 0.649 | 0.673 |

|               |           |       |        |       |       |
|---------------|-----------|-------|--------|-------|-------|
|               | 0.61      | 0.612 | 0.572  | 0.633 | 0.685 |
| c-Jun S63     | 0.055     | 0.063 | 0.045  | 0.038 | 0.059 |
|               | 0.053     | 0.06  | 0.043  | 0.047 | 0.062 |
|               | 0.054     | 0.072 | 0.048  | 0.051 | 0.065 |
|               | 0.059     | 0.067 | 0.057  | 0.055 | 0.076 |
|               | PTPN6 sh2 |       |        |       |       |
| PDGFRb Y771   | 0.287     | 0.298 | 0.321  | 0.312 | 0.314 |
|               | 0.319     | 0.299 | 0.341  | 0.326 | 0.337 |
|               | 0.308     | 0.328 | 0.269  | 0.305 | 0.292 |
|               | 0.34      | 0.358 | 0.368  | 0.377 | 0.352 |
| SHC Y317      | 0.499     | 0.543 | 0.612  | 0.641 | 0.599 |
|               | 0.539     | 0.564 | 0.634  | 0.668 | 0.65  |
|               | 0.475     | 0.512 | 0.466  | 0.546 | 0.555 |
|               | 0.503     | 0.565 | 0.621  | 0.659 | 0.641 |
| c-Cbl Y774    | 0.408     | 0.466 | 0.427  | 0.445 | 0.407 |
|               | 0.425     | 0.408 | 0.402  | 0.4   | 0.403 |
|               | 0.441     | 0.479 | 0.328  | 0.426 | 0.363 |
|               | 0.477     | 0.483 | 0.421  | 0.433 | 0.439 |
| Paxillin Y118 | 0.753     | 0.726 | 0.736  | 0.709 | 0.726 |
|               | 0.721     | 0.634 | 0.625  | 0.637 | 0.703 |
|               | 0.713     | 0.763 | 0.562  | 0.704 | 0.678 |
|               | 0.886     | 0.807 | 0.728  | 0.696 | 0.782 |
| AKT S473      | 0.485     | 0.596 | 0.661  | 0.758 | 0.723 |
|               | 0.488     | 0.532 | 0.531  | 0.586 | 0.541 |
|               | 0.488     | 0.61  | 0.5867 | 0.473 | 0.588 |
|               | 0.562     | 0.564 | 0.568  | 0.583 | 0.763 |
| GSK-3a/b S21  | 0.626     | 0.671 | 0.625  | 0.739 | 0.59  |
|               | 0.628     | 0.619 | 0.577  | 0.646 | 0.674 |
|               | 0.615     | 0.756 | 0.6617 | 0.624 | 0.665 |
|               | 0.828     | 0.707 | 0.783  | 0.861 | 0.816 |
| RPS6 S235/S2  | 0.0887    | 0.092 | 0.1    | 0.106 | 0.214 |
|               | 0.093     | 0.092 | 0.089  | 0.1   | 0.154 |
|               | 0.086     | 0.09  | 0.119  | 0.123 | 0.16  |
|               | 0.087     | 0.093 | 0.098  | 0.103 | 0.178 |
| RPS6 S240/S2  | 0.075     | 0.086 | 0.093  | 0.109 | 0.104 |
|               | 0.088     | 0.075 | 0.083  | 0.094 | 0.088 |
|               | 0.06      | 0.066 | 0.126  | 0.118 | 0.093 |

|              |        |       |        |        |       |
|--------------|--------|-------|--------|--------|-------|
|              | 0.058  | 0.064 | 0.07   | 0.074  | 0.081 |
| PKCb S660    | 0.593  | 0.613 | 0.646  | 0.735  | 0.992 |
|              | 0.647  | 0.611 | 0.693  | 0.794  | 1.059 |
|              | 0.552  | 0.634 | 0.6653 | 0.544  | 0.792 |
|              | 0.603  | 0.644 | 0.657  | 0.812  | 0.995 |
| PKCd S643    | 0.712  | 0.794 | 0.787  | 0.792  | 0.729 |
|              | 0.737  | 0.784 | 0.873  | 0.849  | 0.77  |
|              | 0.639  | 0.707 | 0.822  | 0.8203 | 0.748 |
|              | 0.732  | 0.827 | 0.806  | 0.82   | 0.745 |
| MARCKs S512, | 0.668  | 0.737 | 0.727  | 0.79   | 0.711 |
|              | 0.692  | 0.629 | 0.708  | 0.722  | 0.683 |
|              | 0.646  | 0.76  | 0.7323 | 0.603  | 0.645 |
|              | 0.728  | 0.801 | 0.762  | 0.764  | 0.736 |
| CAMI S81     | 0.555  | 0.635 | 0.698  | 0.702  | 0.536 |
|              | 0.679  | 0.524 | 0.663  | 0.65   | 0.541 |
|              | 0.582  | 0.65  | 0.515  | 0.624  | 0.581 |
|              | 0.842  | 0.878 | 0.86   | 0.6587 | 0.67  |
| RSK3 T356/S3 | 0.542  | 0.621 | 0.706  | 0.817  | 0.869 |
|              | 0.592  | 0.558 | 0.657  | 0.738  | 0.822 |
|              | 0.516  | 0.583 | 0.52   | 0.667  | 0.69  |
|              | 0.595  | 0.629 | 0.664  | 0.776  | 0.855 |
| RAF S289/S29 | 0.191  | 0.187 | 0.185  | 0.229  | 0.208 |
|              | 0.196  | 0.192 | 0.19   | 0.196  | 0.213 |
|              | 0.19   | 0.188 | 0.189  | 0.186  | 0.199 |
|              | 0.1923 | 0.201 | 0.192  | 0.202  | 0.214 |
| MEK S217/S21 | 0.176  | 0.214 | 0.498  | 0.577  | 1.166 |
|              | 0.181  | 0.213 | 0.414  | 0.468  | 1     |
|              | 0.175  | 0.211 | 0.233  | 0.363  | 0.636 |
|              | 0.226  | 0.238 | 0.483  | 0.628  | 1.213 |
| ERK T202/Y20 | 0.38   | 0.408 | 0.767  | 0.821  | 1.142 |
|              | 0.417  | 0.383 | 0.652  | 0.694  | 1.044 |
|              | 0.365  | 0.38  | 0.438  | 0.636  | 0.721 |
|              | 0.432  | 0.409 | 0.695  | 0.91   | 1.046 |
| p90RSK S380  | 0.331  | 0.226 | 0.26   | 0.254  | 0.255 |
|              | 0.499  | 0.282 | 0.295  | 0.326  | 0.366 |
|              | 0.399  | 0.208 | 0.431  | 0.503  | 0.564 |
|              | 0.308  | 0.347 | 0.365  | 0.484  | 0.583 |
| STAT1 Y701   | 0.418  | 0.442 | 0.438  | 0.46   | 0.418 |
|              | 0.445  | 0.439 | 0.464  | 0.507  | 0.499 |

|               |           |       |        |        |        |
|---------------|-----------|-------|--------|--------|--------|
|               | 0.413     | 0.419 | 0.4517 | 0.402  | 0.405  |
|               | 0.423     | 0.453 | 0.453  | 0.52   | 0.462  |
| STAT3 Y705    | 0.623     | 0.576 | 0.598  | 0.649  | 0.604  |
|               | 0.642     | 0.602 | 0.634  | 0.649  | 0.664  |
|               | 0.678     | 0.643 | 0.588  | 0.67   | 0.696  |
|               | 0.73      | 0.689 | 0.677  | 0.734  | 0.73   |
| CREB S133     | 0.711     | 0.666 | 0.868  | 1.003  | 1.048  |
|               | 0.787     | 0.644 | 0.95   | 0.953  | 1.083  |
|               | 0.708     | 0.68  | 0.536  | 0.739  | 0.861  |
|               | 0.751     | 0.731 | 0.843  | 0.946  | 0.99   |
| NF-kB S536    | 0.763     | 0.762 | 0.828  | 0.913  | 0.95   |
|               | 0.763     | 0.73  | 0.808  | 0.878  | 0.915  |
|               | 0.735     | 0.813 | 0.69   | 0.825  | 0.805  |
|               | 0.886     | 0.853 | 0.895  | 0.905  | 1.081  |
| c-Jun S63     | 0.045     | 0.058 | 0.055  | 0.053  | 0.065  |
|               | 0.051     | 0.053 | 0.057  | 0.051  | 0.072  |
|               | 0.039     | 0.06  | 0.057  | 0.042  | 0.058  |
|               | 0.057     | 0.072 | 0.059  | 0.06   | 0.08   |
|               | PTPN6 sh3 |       |        |        |        |
| PDGFRb Y771   | 0.301     | 0.343 | 0.319  | 0.347  | 0.346  |
|               | 0.331     | 0.309 | 0.337  | 0.345  | 0.371  |
|               | 0.316     | 0.313 | 0.291  | 0.311  | 0.307  |
|               | 0.318     | 0.336 | 0.311  | 0.301  | 0.347  |
| SHC Y317      | 0.498     | 0.607 | 0.616  | 0.641  | 0.594  |
|               | 0.598     | 0.602 | 0.667  | 0.662  | 0.658  |
|               | 0.537     | 0.582 | 0.526  | 0.588  | 0.569  |
|               | 0.541     | 0.543 | 0.566  | 0.563  | 0.615  |
| c-Cbl Y774    | 0.431     | 0.471 | 0.452  | 0.453  | 0.444  |
|               | 0.433     | 0.374 | 0.417  | 0.422  | 0.44   |
|               | 0.39      | 0.388 | 0.4347 | 0.4327 | 0.4397 |
|               | 0.432     | 0.428 | 0.435  | 0.423  | 0.435  |
| Paxillin Y118 | 0.743     | 0.698 | 0.655  | 0.701  | 0.626  |
|               | 0.668     | 0.614 | 0.678  | 0.715  | 0.688  |
|               | 0.664     | 0.636 | 0.545  | 0.618  | 0.57   |
|               | 0.718     | 0.707 | 0.688  | 0.7    | 0.661  |
| AKT S473      | 0.488     | 0.617 | 0.678  | 0.569  | 0.707  |
|               | 0.646     | 0.507 | 0.581  | 0.587  | 0.713  |

|              |        |        |        |        |       |
|--------------|--------|--------|--------|--------|-------|
|              | 0.494  | 0.519  | 0.426  | 0.473  | 0.605 |
|              | 0.633  | 0.624  | 0.653  | 0.617  | 0.846 |
| GSK-3a/b S21 | 0.5    | 0.629  | 0.669  | 0.621  | 0.713 |
|              | 0.641  | 0.559  | 0.629  | 0.622  | 0.681 |
|              | 0.573  | 0.586  | 0.482  | 0.497  | 0.551 |
|              | 0.695  | 0.703  | 0.717  | 0.717  | 0.642 |
| RPS6 S235/S2 | 0.0883 | 0.104  | 0.114  | 0.13   | 0.19  |
|              | 0.095  | 0.09   | 0.107  | 0.118  | 0.159 |
|              | 0.084  | 0.085  | 0.113  | 0.092  | 0.171 |
|              | 0.086  | 0.094  | 0.105  | 0.11   | 0.197 |
| RPS6 S240/S2 | 0.054  | 0.106  | 0.134  | 0.16   | 0.176 |
|              | 0.098  | 0.093  | 0.119  | 0.132  | 0.166 |
|              | 0.063  | 0.069  | 0.116  | 0.091  | 0.143 |
|              | 0.064  | 0.075  | 0.09   | 0.097  | 0.135 |
| PKCb S660    | 0.569  | 0.673  | 0.586  | 0.704  | 0.975 |
|              | 0.624  | 0.632  | 0.673  | 0.735  | 1.066 |
|              | 0.546  | 0.651  | 0.563  | 0.642  | 0.75  |
|              | 0.589  | 0.665  | 0.593  | 0.655  | 0.963 |
| PKCd S643    | 0.834  | 0.8203 | 0.809  | 0.842  | 0.819 |
|              | 0.855  | 0.824  | 0.808  | 0.831  | 0.806 |
|              | 0.84   | 0.839  | 0.721  | 0.768  | 0.724 |
|              | 0.779  | 0.798  | 0.732  | 0.7    | 0.766 |
| MARCKs S512, | 0.661  | 0.723  | 0.696  | 0.721  | 0.654 |
|              | 0.7    | 0.655  | 0.707  | 0.702  | 0.726 |
|              | 0.615  | 0.641  | 0.6987 | 0.7193 | 0.548 |
|              | 0.668  | 0.684  | 0.693  | 0.735  | 0.688 |
| CAMI S81     | 0.852  | 0.794  | 0.708  | 0.732  | 0.788 |
|              | 0.676  | 0.573  | 0.627  | 0.663  | 0.802 |
|              | 0.578  | 0.59   | 0.582  | 0.621  | 0.686 |
|              | 0.658  | 0.637  | 0.598  | 0.599  | 0.575 |
| RSK3 T356/S3 | 0.548  | 0.588  | 0.624  | 0.69   | 0.843 |
|              | 0.5    | 0.493  | 0.615  | 0.669  | 0.848 |
|              | 0.501  | 0.503  | 0.5    | 0.574  | 0.643 |
|              | 0.591  | 0.564  | 0.6    | 0.656  | 0.888 |
| RAF S289/S29 | 0.206  | 0.218  | 0.206  | 0.212  | 0.182 |
|              | 0.194  | 0.167  | 0.193  | 0.19   | 0.199 |
|              | 0.186  | 0.176  | 0.164  | 0.175  | 0.166 |
|              | 0.2    | 0.196  | 0.198  | 0.19   | 0.198 |
| MEK S217/S2: | 0.172  | 0.215  | 0.34   | 0.426  | 0.79  |

|              |            |        |       |       |        |
|--------------|------------|--------|-------|-------|--------|
|              | 0.172      | 0.21   | 0.331 | 0.441 | 0.707  |
|              | 0.171      | 0.195  | 0.211 | 0.309 | 0.412  |
|              | 0.195      | 0.203  | 0.358 | 0.445 | 0.735  |
| ERK T202/Y20 | 0.351      | 0.428  | 0.587 | 0.619 | 1.062  |
|              | 0.352      | 0.366  | 0.58  | 0.714 | 1.01   |
|              | 0.354      | 0.367  | 0.452 | 0.588 | 0.768  |
|              | 0.382      | 0.394  | 0.593 | 0.75  | 1.007  |
| p90RSK S380  | 0.3443     | 0.214  | 0.237 | 0.199 | 0.113  |
|              | 0.338      | 0.271  | 0.229 | 0.275 | 0.338  |
|              | 0.399      | 0.285  | 0.357 | 0.401 | 0.464  |
|              | 0.296      | 0.267  | 0.304 | 0.368 | 0.49   |
| STAT1 Y701   | 0.436      | 0.429  | 0.432 | 0.47  | 0.436  |
|              | 0.416      | 0.416  | 0.443 | 0.451 | 0.458  |
|              | 0.442      | 0.429  | 0.427 | 0.448 | 0.445  |
|              | 0.417      | 0.442  | 0.449 | 0.433 | 0.45   |
| STAT3 Y705   | 0.654      | 0.693  | 0.648 | 0.697 | 0.598  |
|              | 0.644      | 0.637  | 0.668 | 0.649 | 0.641  |
|              | 0.686      | 0.715  | 0.678 | 0.735 | 0.608  |
|              | 0.743      | 0.731  | 0.726 | 0.713 | 0.755  |
| CREB S133    | 0.668      | 0.659  | 0.861 | 0.941 | 1.028  |
|              | 0.769      | 0.677  | 0.936 | 0.956 | 1.158  |
|              | 0.803      | 0.714  | 0.711 | 0.888 | 0.829  |
|              | 0.822      | 0.754  | 0.836 | 0.872 | 1.069  |
| NF-kB S536   | 0.747      | 0.792  | 0.794 | 0.854 | 0.909  |
|              | 0.751      | 0.698  | 0.781 | 0.862 | 0.926  |
|              | 0.752      | 0.694  | 0.642 | 0.769 | 0.9287 |
|              | 0.766      | 0.799  | 0.772 | 0.846 | 0.951  |
| c-Jun S63    | 0.045      | 0.0527 | 0.049 | 0.058 | 0.062  |
|              | 0.042      | 0.045  | 0.053 | 0.055 | 0.058  |
|              | 0.041      | 0.052  | 0.052 | 0.049 | 0.053  |
|              | 0.051      | 0.061  | 0.054 | 0.054 | 0.08   |
|              | PTPN11 sh1 |        |       |       |        |
| PDGFRb Y771  | 0.286      | 0.301  | 0.292 | 0.328 | 0.296  |
|              | 0.278      | 0.327  | 0.281 | 0.361 | 0.341  |
|              | 0.303      | 0.298  | 0.319 | 0.301 | 0.257  |
|              | 0.328      | 0.34   | 0.361 | 0.343 | 0.334  |
| SHC Y317     | 0.532      | 0.529  | 0.51  | 0.567 | 0.553  |

|               |        |       |        |       |        |
|---------------|--------|-------|--------|-------|--------|
|               | 0.524  | 0.566 | 0.526  | 0.597 | 0.627  |
|               | 0.491  | 0.506 | 0.5    | 0.566 | 0.483  |
|               | 0.53   | 0.547 | 0.603  | 0.629 | 0.589  |
| c-Cbl Y774    | 0.462  | 0.406 | 0.376  | 0.448 | 0.402  |
|               | 0.372  | 0.424 | 0.353  | 0.423 | 0.428  |
|               | 0.477  | 0.462 | 0.434  | 0.412 | 0.367  |
|               | 0.495  | 0.46  | 0.451  | 0.421 | 0.458  |
| Paxillin Y118 | 0.771  | 0.761 | 0.6    | 0.761 | 0.728  |
|               | 0.623  | 0.682 | 0.6657 | 0.694 | 0.675  |
|               | 0.721  | 0.795 | 0.672  | 0.721 | 0.635  |
|               | 0.839  | 0.812 | 0.725  | 0.669 | 0.808  |
| AKT S473      | 0.488  | 0.53  | 0.409  | 0.622 | 0.655  |
|               | 0.412  | 0.484 | 0.386  | 0.584 | 0.732  |
|               | 0.555  | 0.611 | 0.495  | 0.535 | 0.549  |
|               | 0.578  | 0.579 | 0.561  | 0.555 | 0.802  |
| GSK-3a/b S21  | 0.642  | 0.675 | 0.475  | 0.811 | 0.608  |
|               | 0.515  | 0.617 | 0.422  | 0.902 | 0.706  |
|               | 0.718  | 0.762 | 0.65   | 0.642 | 0.58   |
|               | 0.709  | 0.818 | 0.815  | 0.691 | 0.78   |
| RPS6 S235/S2  | 0.089  | 0.105 | 0.116  | 0.146 | 0.212  |
|               | 0.097  | 0.103 | 0.143  | 0.143 | 0.177  |
|               | 0.091  | 0.109 | 0.134  | 0.097 | 0.177  |
|               | 0.096  | 0.12  | 0.13   | 0.094 | 0.18   |
| RPS6 S240/S2  | 0.081  | 0.1   | 0.123  | 0.114 | 0.143  |
|               | 0.086  | 0.088 | 0.143  | 0.101 | 0.105  |
|               | 0.078  | 0.082 | 0.111  | 0.095 | 0.13   |
|               | 0.076  | 0.083 | 0.095  | 0.091 | 0.095  |
| PKCb S660     | 0.587  | 0.604 | 0.569  | 0.67  | 0.815  |
|               | 0.598  | 0.663 | 0.546  | 0.805 | 1.015  |
|               | 0.602  | 0.613 | 0.59   | 0.676 | 0.643  |
|               | 0.605  | 0.627 | 0.682  | 0.797 | 0.919  |
| PKCd S643     | 0.751  | 0.75  | 0.728  | 0.697 | 0.686  |
|               | 0.74   | 0.801 | 0.743  | 0.739 | 0.772  |
|               | 0.696  | 0.697 | 0.71   | 0.726 | 0.7317 |
|               | 0.774  | 0.763 | 0.766  | 0.777 | 0.737  |
| MARCKs S512,  | 0.722  | 0.723 | 0.578  | 0.763 | 0.661  |
|               | 0.7355 | 0.716 | 0.6563 | 0.774 | 0.738  |
|               | 0.749  | 0.737 | 0.627  | 0.697 | 0.606  |
|               | 0.7355 | 0.748 | 0.764  | 0.794 | 0.806  |

|              |       |        |        |       |       |
|--------------|-------|--------|--------|-------|-------|
| CAMI S81     | 0.632 | 0.621  | 0.533  | 0.758 | 0.679 |
|              | 0.526 | 0.663  | 0.559  | 0.919 | 0.728 |
|              | 0.683 | 0.647  | 0.621  | 0.608 | 0.551 |
|              | 0.888 | 0.793  | 0.837  | 0.682 | 0.747 |
| RSK3 T356/S3 | 0.611 | 0.632  | 0.592  | 0.653 | 0.723 |
|              | 0.534 | 0.6    | 0.538  | 0.728 | 0.778 |
|              | 0.575 | 0.58   | 0.613  | 0.667 | 0.576 |
|              | 0.605 | 0.604  | 0.695  | 0.678 | 0.776 |
| RAF S289/S29 | 0.211 | 0.187  | 0.167  | 0.196 | 0.21  |
|              | 0.169 | 0.183  | 0.1753 | 0.187 | 0.2   |
|              | 0.192 | 0.189  | 0.171  | 0.201 | 0.18  |
|              | 0.203 | 0.192  | 0.188  | 0.186 | 0.211 |
| MEK S217/S2  | 0.207 | 0.206  | 0.33   | 0.461 | 0.691 |
|              | 0.2   | 0.194  | 0.241  | 0.633 | 0.981 |
|              | 0.188 | 0.202  | 0.382  | 0.443 | 0.523 |
|              | 0.217 | 0.238  | 0.514  | 0.503 | 1.104 |
| ERK T202/Y20 | 0.416 | 0.426  | 0.626  | 0.856 | 1.003 |
|              | 0.376 | 0.418  | 0.489  | 0.934 | 1.216 |
|              | 0.39  | 0.405  | 0.637  | 0.733 | 0.836 |
|              | 0.418 | 0.436  | 0.769  | 0.793 | 1.129 |
| p90RSK S380  | 0.242 | 0.267  | 0.416  | 0.214 | 0.621 |
|              | 0.293 | 0.253  | 0.404  | 0.435 | 0.706 |
|              | 0.444 | 0.268  | 0.347  | 0.387 | 0.438 |
|              | 0.428 | 0.337  | 0.367  | 0.563 | 0.432 |
| STAT1 Y701   | 0.44  | 0.425  | 0.421  | 0.426 | 0.447 |
|              | 0.454 | 0.482  | 0.434  | 0.483 | 0.506 |
|              | 0.416 | 0.404  | 0.451  | 0.421 | 0.398 |
|              | 0.43  | 0.419  | 0.443  | 0.484 | 0.452 |
| STAT3 Y705   | 0.61  | 0.69   | 0.598  | 0.715 | 0.634 |
|              | 0.622 | 0.709  | 0.602  | 0.719 | 0.7   |
|              | 0.687 | 0.74   | 0.677  | 0.64  | 0.657 |
|              | 0.703 | 0.764  | 0.71   | 0.679 | 0.737 |
| CREB S133    | 0.824 | 0.807  | 0.861  | 0.938 | 1.019 |
|              | 0.799 | 0.826  | 0.799  | 0.978 | 1.204 |
|              | 0.768 | 0.715  | 0.865  | 0.995 | 0.742 |
|              | 0.825 | 0.7827 | 1.014  | 1.148 | 1.063 |
| NF-kB S536   | 0.768 | 0.848  | 0.714  | 0.978 | 0.879 |
|              | 0.73  | 0.805  | 0.645  | 1     | 0.963 |
|              | 0.782 | 0.911  | 0.823  | 0.902 | 0.79  |
|              | 0.894 | 0.941  | 0.898  | 0.927 | 1.119 |

|               |       |        |        |       |       |
|---------------|-------|--------|--------|-------|-------|
| c-Jun S63     | 0.052 | 0.065  | 0.046  | 0.059 | 0.074 |
|               | 0.038 | 0.057  | 0.036  | 0.053 | 0.063 |
|               | 0.046 | 0.057  | 0.048  | 0.057 | 0.042 |
|               | 0.057 | 0.0597 | 0.061  | 0.056 | 0.068 |
| PTPN11 sh4    |       |        |        |       |       |
| PDGFRb Y771   | 0.334 | 0.299  | 0.261  | 0.28  | 0.305 |
|               | 0.314 | 0.295  | 0.345  | 0.308 | 0.337 |
|               | 0.343 | 0.298  | 0.299  | 0.259 | 0.299 |
|               | 0.34  | 0.313  | 0.329  | 0.318 | 0.346 |
| SHC Y317      | 0.521 | 0.604  | 0.501  | 0.533 | 0.546 |
|               | 0.541 | 0.639  | 0.66   | 0.549 | 0.638 |
|               | 0.531 | 0.634  | 0.572  | 0.454 | 0.548 |
|               | 0.581 | 0.581  | 0.578  | 0.602 | 0.622 |
| c-Cbl Y774    | 0.447 | 0.412  | 0.356  | 0.361 | 0.365 |
|               | 0.419 | 0.41   | 0.44   | 0.445 | 0.389 |
|               | 0.455 | 0.426  | 0.398  | 0.34  | 0.332 |
|               | 0.467 | 0.422  | 0.44   | 0.408 | 0.399 |
| Paxillin Y118 | 0.643 | 0.651  | 0.471  | 0.542 | 0.603 |
|               | 0.597 | 0.687  | 0.628  | 0.681 | 0.68  |
|               | 0.665 | 0.648  | 0.543  | 0.558 | 0.573 |
|               | 0.707 | 0.679  | 0.645  | 0.669 | 0.658 |
| AKT S473      | 0.529 | 0.547  | 0.368  | 0.455 | 0.561 |
|               | 0.422 | 0.541  | 0.531  | 0.7   | 0.617 |
|               | 0.532 | 0.585  | 0.461  | 0.42  | 0.549 |
|               | 0.64  | 0.635  | 0.621  | 0.583 | 0.775 |
| GSK-3a/b S21  | 0.619 | 0.655  | 0.46   | 0.541 | 0.574 |
|               | 0.549 | 0.598  | 0.633  | 0.689 | 0.56  |
|               | 0.687 | 0.661  | 0.512  | 0.518 | 0.495 |
|               | 0.64  | 0.585  | 0.728  | 0.685 | 0.652 |
| RPS6 S235/S2  | 0.102 | 0.119  | 0.198  | 0.169 | 0.225 |
|               | 0.101 | 0.126  | 0.123  | 0.161 | 0.191 |
|               | 0.096 | 0.13   | 0.154  | 0.172 | 0.177 |
|               | 0.112 | 0.138  | 0.139  | 0.122 | 0.186 |
| RPS6 S240/S2  | 0.121 | 0.136  | 0.1447 | 0.178 | 0.286 |
|               | 0.131 | 0.116  | 0.139  | 0.139 | 0.198 |
|               | 0.094 | 0.112  | 0.165  | 0.253 | 0.161 |
|               | 0.108 | 0.106  | 0.13   | 0.172 | 0.141 |

|              |        |       |        |        |       |
|--------------|--------|-------|--------|--------|-------|
| PKCb S660    | 0.534  | 0.612 | 0.6047 | 0.613  | 0.722 |
|              | 0.538  | 0.642 | 0.637  | 0.721  | 1.037 |
|              | 0.65   | 0.665 | 0.568  | 0.597  | 0.733 |
|              | 0.614  | 0.647 | 0.609  | 0.721  | 0.984 |
| PKCd S643    | 0.798  | 0.793 | 0.681  | 0.803  | 0.799 |
|              | 0.779  | 0.833 | 0.797  | 0.817  | 0.841 |
|              | 0.845  | 0.856 | 0.747  | 0.783  | 0.766 |
|              | 0.808  | 0.8   | 0.744  | 0.826  | 0.826 |
| MARCKs S512, | 0.577  | 0.648 | 0.387  | 0.464  | 0.482 |
|              | 0.53   | 0.661 | 0.602  | 0.678  | 0.611 |
|              | 0.609  | 0.638 | 0.477  | 0.414  | 0.492 |
|              | 0.607  | 0.592 | 0.584  | 0.584  | 0.635 |
| CAMI S81     | 0.588  | 0.653 | 0.463  | 0.572  | 0.644 |
|              | 0.528  | 0.595 | 0.63   | 0.626  | 0.694 |
|              | 0.69   | 0.605 | 0.542  | 0.547  | 0.595 |
|              | 0.632  | 0.571 | 0.588  | 0.639  | 0.516 |
| RSK3 T356/S3 | 0.53   | 0.526 | 0.54   | 0.577  | 0.636 |
|              | 0.463  | 0.497 | 0.669  | 0.737  | 0.783 |
|              | 0.515  | 0.52  | 0.583  | 0.558  | 0.608 |
|              | 0.5027 | 0.549 | 0.686  | 0.65   | 0.84  |
| RAF S289/S29 | 0.186  | 0.19  | 0.1703 | 0.171  | 0.179 |
|              | 0.191  | 0.179 | 0.17   | 0.1743 | 0.178 |
|              | 0.189  | 0.187 | 0.159  | 0.169  | 0.165 |
|              | 0.198  | 0.189 | 0.182  | 0.183  | 0.191 |
| MEK S217/S22 | 0.197  | 0.194 | 0.239  | 0.345  | 0.523 |
|              | 0.191  | 0.191 | 0.37   | 0.522  | 0.863 |
|              | 0.188  | 0.199 | 0.315  | 0.381  | 0.494 |
|              | 0.194  | 0.184 | 0.463  | 0.455  | 0.873 |
| ERK T202/Y20 | 0.368  | 0.389 | 0.531  | 0.576  | 0.709 |
|              | 0.336  | 0.363 | 0.629  | 0.841  | 0.912 |
|              | 0.382  | 0.388 | 0.595  | 0.596  | 0.809 |
|              | 0.387  | 0.372 | 0.687  | 0.613  | 0.921 |
| p90RSK S380  | 0.234  | 0.269 | 0.389  | 0.29   | 0.645 |
|              | 0.279  | 0.23  | 0.285  | 0.311  | 0.654 |
|              | 0.262  | 0.269 | 0.328  | 0.3133 | 0.349 |
|              | 0.273  | 0.326 | 0.329  | 0.339  | 0.372 |
| STAT1 Y701   | 0.437  | 0.439 | 0.376  | 0.422  | 0.458 |
|              | 0.436  | 0.448 | 0.449  | 0.447  | 0.506 |
|              | 0.469  | 0.461 | 0.416  | 0.402  | 0.461 |

|               |           |       |       |       |       |
|---------------|-----------|-------|-------|-------|-------|
|               | 0.492     | 0.461 | 0.441 | 0.445 | 0.492 |
| STAT3 Y705    | 0.635     | 0.652 | 0.543 | 0.726 | 0.621 |
|               | 0.63      | 0.714 | 0.637 | 0.78  | 0.672 |
|               | 0.687     | 0.735 | 0.652 | 0.59  | 0.604 |
|               | 0.767     | 0.767 | 0.689 | 0.711 | 0.775 |
| CREB S133     | 0.746     | 0.736 | 0.584 | 0.688 | 0.901 |
|               | 0.763     | 0.809 | 0.878 | 0.858 | 1.211 |
|               | 0.84      | 0.793 | 0.727 | 0.595 | 0.896 |
|               | 0.822     | 0.706 | 0.853 | 0.934 | 1.098 |
| NF-kB S536    | 0.704     | 0.725 | 0.625 | 0.717 | 0.797 |
|               | 0.677     | 0.77  | 0.749 | 0.877 | 0.97  |
|               | 0.801     | 0.816 | 0.692 | 0.699 | 0.792 |
|               | 0.79      | 0.792 | 0.761 | 0.769 | 0.981 |
| c-Jun S63     | 0.049     | 0.051 | 0.026 | 0.037 | 0.057 |
|               | 0.037     | 0.044 | 0.045 | 0.055 | 0.052 |
|               | 0.054     | 0.063 | 0.044 | 0.037 | 0.048 |
|               | 0.06      | 0.061 | 0.053 | 0.051 | 0.078 |
|               | PTPN pool |       |       |       |       |
| PDGFRb Y771   | 0.296     | 0.304 | 0.343 | 0.345 | 0.343 |
|               | 0.339     | 0.319 | 0.37  | 0.369 | 0.375 |
|               | 0.292     | 0.309 | 0.327 | 0.33  | 0.357 |
|               | 0.285     | 0.308 | 0.36  | 0.376 | 0.335 |
| SHC Y317      | 0.508     | 0.549 | 0.576 | 0.585 | 0.579 |
|               | 0.561     | 0.568 | 0.622 | 0.657 | 0.615 |
|               | 0.515     | 0.549 | 0.553 | 0.59  | 0.563 |
|               | 0.528     | 0.58  | 0.601 | 0.614 | 0.604 |
| c-Cbl Y774    | 0.437     | 0.419 | 0.398 | 0.433 | 0.403 |
|               | 0.46      | 0.428 | 0.43  | 0.444 | 0.443 |
|               | 0.444     | 0.437 | 0.395 | 0.441 | 0.415 |
|               | 0.459     | 0.439 | 0.397 | 0.417 | 0.444 |
| Paxillin Y118 | 0.762     | 0.652 | 0.703 | 0.714 | 0.719 |
|               | 0.821     | 0.677 | 0.739 | 0.751 | 0.787 |
|               | 0.739     | 0.684 | 0.658 | 0.699 | 0.727 |
|               | 0.774     | 0.733 | 0.69  | 0.701 | 0.757 |
| AKT S473      | 0.544     | 0.51  | 0.56  | 0.633 | 0.765 |
|               | 0.545     | 0.492 | 0.596 | 0.62  | 0.819 |
|               | 0.59      | 0.607 | 0.625 | 0.64  | 0.723 |

|              |       |       |        |        |        |
|--------------|-------|-------|--------|--------|--------|
|              | 0.616 | 0.59  | 0.667  | 0.566  | 0.827  |
| GSK-3a/b S21 | 0.612 | 0.571 | 0.593  | 0.736  | 0.689  |
|              | 0.637 | 0.535 | 0.619  | 0.799  | 0.76   |
|              | 0.533 | 0.559 | 0.538  | 0.647  | 0.616  |
|              | 0.572 | 0.669 | 0.866  | 0.7273 | 0.643  |
| RPS6 S235/S2 | 0.085 | 0.105 | 0.114  | 0.131  | 0.208  |
|              | 0.092 | 0.109 | 0.128  | 0.139  | 0.211  |
|              | 0.094 | 0.102 | 0.103  | 0.117  | 0.223  |
|              | 0.097 | 0.116 | 0.143  | 0.177  | 0.259  |
| RPS6 S240/S2 | 0.08  | 0.086 | 0.091  | 0.104  | 0.085  |
|              | 0.08  | 0.09  | 0.116  | 0.118  | 0.111  |
|              | 0.073 | 0.081 | 0.083  | 0.091  | 0.119  |
|              | 0.077 | 0.084 | 0.082  | 0.099  | 0.14   |
| PKCb S660    | 0.616 | 0.586 | 0.661  | 0.774  | 0.906  |
|              | 0.652 | 0.63  | 0.697  | 0.807  | 0.776  |
|              | 0.63  | 0.633 | 0.657  | 0.712  | 0.982  |
|              | 0.603 | 0.611 | 0.647  | 0.825  | 0.913  |
| PKCd S643    | 0.698 | 0.743 | 0.739  | 0.697  | 0.743  |
|              | 0.795 | 0.785 | 0.822  | 0.719  | 0.789  |
|              | 0.73  | 0.772 | 0.711  | 0.691  | 0.736  |
|              | 0.729 | 0.775 | 0.763  | 0.706  | 0.761  |
| MARCKs S512, | 0.665 | 0.559 | 0.682  | 0.748  | 0.691  |
|              | 0.577 | 0.535 | 0.648  | 0.695  | 0.726  |
|              | 0.632 | 0.6   | 0.62   | 0.731  | 0.645  |
|              | 0.706 | 0.792 | 0.931  | 0.7247 | 0.756  |
| CAMI S81     | 0.437 | 0.358 | 0.429  | 0.445  | 0.421  |
|              | 0.635 | 0.515 | 0.615  | 0.637  | 0.5    |
|              | 0.548 | 0.51  | 0.528  | 0.604  | 0.458  |
|              | 0.596 | 0.616 | 0.639  | 0.795  | 0.56   |
| RSK3 T356/S3 | 0.622 | 0.532 | 0.664  | 0.741  | 0.84   |
|              | 0.621 | 0.537 | 0.685  | 0.744  | 0.915  |
|              | 0.596 | 0.579 | 0.65   | 0.752  | 0.879  |
|              | 0.594 | 0.561 | 0.652  | 0.757  | 0.944  |
| RAF S289/S29 | 0.201 | 0.192 | 0.189  | 0.201  | 0.198  |
|              | 0.21  | 0.203 | 0.198  | 0.206  | 0.216  |
|              | 0.178 | 0.177 | 0.2033 | 0.2057 | 0.2007 |
|              | 0.156 | 0.192 | 0.223  | 0.21   | 0.188  |
| MEK S217/S2  | 0.169 | 0.172 | 0.365  | 0.524  | 0.949  |
|              | 0.169 | 0.172 | 0.442  | 0.5    | 0.97   |

|              |          |        |       |        |        |
|--------------|----------|--------|-------|--------|--------|
|              | 0.184    | 0.183  | 0.406 | 0.485  | 0.972  |
|              | 0.19     | 0.193  | 0.422 | 0.478  | 0.966  |
| ERK T202/Y20 | 0.375    | 0.341  | 0.633 | 0.698  | 0.992  |
|              | 0.387    | 0.339  | 0.662 | 0.709  | 1.084  |
|              | 0.371    | 0.35   | 0.613 | 0.93   | 1.067  |
|              | 0.396    | 0.354  | 0.628 | 0.827  | 1.009  |
| p90RSK S380  | 0.377    | 0.147  | 0.157 | 0.138  | 0.1345 |
|              | 0.422    | 0.151  | 0.143 | 0.138  | 0.1345 |
|              | 0.442    | 0.155  | 0.152 | 0.159  | 0.135  |
|              | 0.384    | 0.145  | 0.16  | 0.171  | 0.134  |
| STAT1 Y701   | 0.409    | 0.401  | 0.418 | 0.452  | 0.418  |
|              | 0.478    | 0.416  | 0.43  | 0.455  | 0.463  |
|              | 0.409    | 0.433  | 0.408 | 0.422  | 0.441  |
|              | 0.458    | 0.447  | 0.448 | 0.456  | 0.495  |
| STAT3 Y705   | 0.647    | 0.6193 | 0.631 | 0.653  | 0.629  |
|              | 0.708    | 0.643  | 0.692 | 0.696  | 0.694  |
|              | 0.675    | 0.615  | 0.633 | 0.614  | 0.665  |
|              | 0.659    | 0.6    | 0.654 | 0.716  | 0.672  |
| CREB S133    | 0.807    | 0.533  | 0.813 | 0.9    | 0.853  |
|              | 0.903    | 0.62   | 0.898 | 0.933  | 1.004  |
|              | 0.788    | 0.618  | 0.795 | 0.871  | 1.078  |
|              | 0.808    | 0.678  | 0.904 | 0.854  | 1.148  |
| NF-kB S536   | 0.736    | 0.776  | 0.845 | 0.943  | 1.016  |
|              | 0.734    | 0.766  | 0.869 | 0.949  | 1.033  |
|              | 0.763    | 0.794  | 0.806 | 0.908  | 1.071  |
|              | 0.759    | 0.763  | 0.806 | 0.874  | 1.064  |
| c-Jun S63    | 0.043    | 0.067  | 0.055 | 0.063  | 0.068  |
|              | 0.055    | 0.06   | 0.062 | 0.064  | 0.078  |
|              | 0.058    | 0.066  | 0.056 | 0.0635 | 0.065  |
|              | 0.065    | 0.08   | 0.063 | 0.0635 | 0.0703 |
|              | PTEN sh1 |        |       |        |        |
| PDGFRb Y771  | 0.258    | 0.255  | 0.279 | 0.277  | 0.277  |
|              | 0.274    | 0.262  | 0.272 | 0.271  | 0.276  |
|              | 0.294    | 0.28   | 0.294 | 0.304  | 0.321  |
|              | 0.293    | 0.298  | 0.296 | 0.303  | 0.314  |
| SHC Y317     | 0.428    | 0.425  | 0.485 | 0.467  | 0.473  |
|              | 0.413    | 0.432  | 0.468 | 0.439  | 0.47   |

|               |        |       |       |       |       |
|---------------|--------|-------|-------|-------|-------|
|               | 0.437  | 0.445 | 0.493 | 0.484 | 0.513 |
|               | 0.434  | 0.473 | 0.484 | 0.47  | 0.501 |
| c-Cbl Y774    | 0.3777 | 0.374 | 0.4   | 0.374 | 0.38  |
|               | 0.364  | 0.371 | 0.386 | 0.361 | 0.386 |
|               | 0.399  | 0.367 | 0.388 | 0.373 | 0.407 |
|               | 0.37   | 0.416 | 0.392 | 0.378 | 0.399 |
| Paxillin Y118 | 0.585  | 0.642 | 0.654 | 0.664 | 0.651 |
|               | 0.687  | 0.658 | 0.645 | 0.656 | 0.664 |
|               | 0.717  | 0.621 | 0.651 | 0.676 | 0.714 |
|               | 0.69   | 0.661 | 0.65  | 0.686 | 0.692 |
| AKT S473      | 0.551  | 0.551 | 0.591 | 0.627 | 0.68  |
|               | 0.585  | 0.533 | 0.611 | 0.686 | 0.784 |
|               | 0.5773 | 0.552 | 0.595 | 0.707 | 0.674 |
|               | 0.596  | 0.576 | 0.656 | 0.702 | 0.827 |
| GSK-3a/b S21  | 0.479  | 0.541 | 0.544 | 0.621 | 0.65  |
|               | 0.548  | 0.53  | 0.553 | 0.571 | 0.659 |
|               | 0.586  | 0.497 | 0.486 | 0.596 | 0.672 |
|               | 0.499  | 0.553 | 0.506 | 0.53  | 0.681 |
| RPS6 S235/S2  | 0.107  | 0.084 | 0.102 | 0.136 | 0.212 |
|               | 0.107  | 0.084 | 0.083 | 0.137 | 0.202 |
|               | 0.104  | 0.093 | 0.103 | 0.139 | 0.21  |
|               | 0.098  | 0.086 | 0.125 | 0.125 | 0.257 |
| RPS6 S240/S2  | 0.106  | 0.091 | 0.095 | 0.181 | 0.193 |
|               | 0.097  | 0.091 | 0.082 | 0.157 | 0.198 |
|               | 0.118  | 0.136 | 0.138 | 0.178 | 0.209 |
|               | 0.117  | 0.126 | 0.151 | 0.157 | 0.21  |
| PKCb S660     | 0.568  | 0.608 | 0.617 | 0.801 | 1.06  |
|               | 0.648  | 0.597 | 0.598 | 0.703 | 0.97  |
|               | 0.657  | 0.637 | 0.574 | 0.711 | 1.076 |
|               | 0.617  | 0.639 | 0.613 | 0.68  | 1.018 |
| PKCd S643     | 0.635  | 0.673 | 0.68  | 0.676 | 0.665 |
|               | 0.679  | 0.679 | 0.664 | 0.665 | 0.671 |
|               | 0.721  | 0.721 | 0.673 | 0.704 | 0.733 |
|               | 0.683  | 0.691 | 0.659 | 0.693 | 0.695 |
| MARCKs S512,  | 0.593  | 0.73  | 0.738 | 0.743 | 0.719 |
|               | 0.682  | 0.724 | 0.724 | 0.71  | 0.672 |
|               | 0.654  | 0.625 | 0.656 | 0.748 | 0.709 |
|               | 0.616  | 0.734 | 0.65  | 0.653 | 0.691 |
| CAMI S81      | 0.691  | 0.749 | 0.676 | 0.704 | 0.692 |

|              |        |        |        |       |        |
|--------------|--------|--------|--------|-------|--------|
|              | 0.717  | 0.626  | 0.628  | 0.787 | 0.634  |
|              | 0.858  | 0.721  | 0.75   | 0.843 | 0.924  |
|              | 0.767  | 0.869  | 0.725  | 0.841 | 0.845  |
| RSK3 T356/S3 | 0.498  | 0.557  | 0.549  | 0.636 | 0.709  |
|              | 0.538  | 0.566  | 0.537  | 0.608 | 0.692  |
|              | 0.569  | 0.587  | 0.537  | 0.616 | 0.709  |
|              | 0.535  | 0.604  | 0.526  | 0.603 | 0.706  |
| RAF S289/S29 | 0.171  | 0.166  | 0.186  | 0.182 | 0.199  |
|              | 0.183  | 0.169  | 0.181  | 0.183 | 0.208  |
|              | 0.199  | 0.173  | 0.178  | 0.177 | 0.215  |
|              | 0.185  | 0.1693 | 0.184  | 0.181 | 0.209  |
| MEK S217/S2  | 0.161  | 0.181  | 0.216  | 0.445 | 0.736  |
|              | 0.195  | 0.179  | 0.202  | 0.387 | 0.706  |
|              | 0.189  | 0.192  | 0.213  | 0.478 | 0.867  |
|              | 0.192  | 0.202  | 0.21   | 0.444 | 0.883  |
| ERK T202/Y20 | 0.328  | 0.36   | 0.488  | 0.847 | 1.073  |
|              | 0.365  | 0.373  | 0.459  | 0.783 | 1.053  |
|              | 0.4    | 0.392  | 0.482  | 0.74  | 1.154  |
|              | 0.382  | 0.409  | 0.44   | 0.729 | 1.125  |
| p90RSK S380  | 0.598  | 0.218  | 0.249  | 0.234 | 0.355  |
|              | 0.489  | 0.245  | 0.246  | 0.252 | 0.35   |
|              | 0.519  | 0.378  | 0.278  | 0.226 | 0.344  |
|              | 0.64   | 0.267  | 0.315  | 0.239 | 0.33   |
| STAT1 Y701   | 0.375  | 0.414  | 0.43   | 0.44  | 0.441  |
|              | 0.384  | 0.419  | 0.423  | 0.444 | 0.457  |
|              | 0.434  | 0.434  | 0.439  | 0.463 | 0.472  |
|              | 0.436  | 0.456  | 0.437  | 0.448 | 0.45   |
| STAT3 Y705   | 0.5697 | 0.57   | 0.5763 | 0.577 | 0.531  |
|              | 0.573  | 0.575  | 0.59   | 0.547 | 0.548  |
|              | 0.572  | 0.5747 | 0.569  | 0.566 | 0.582  |
|              | 0.564  | 0.579  | 0.57   | 0.567 | 0.57   |
| CREB S133    | 0.5377 | 0.514  | 0.595  | 0.628 | 0.725  |
|              | 0.533  | 0.518  | 0.545  | 0.611 | 0.729  |
|              | 0.545  | 0.55   | 0.615  | 0.681 | 0.85   |
|              | 0.535  | 0.664  | 0.577  | 0.702 | 0.824  |
| NF-kB S536   | 0.564  | 0.585  | 0.591  | 0.732 | 0.7323 |
|              | 0.593  | 0.587  | 0.587  | 0.696 | 0.715  |
|              | 0.625  | 0.607  | 0.589  | 0.705 | 0.767  |
|              | 0.588  | 0.607  | 0.581  | 0.674 | 0.715  |

|               |       |       |       |       |       |
|---------------|-------|-------|-------|-------|-------|
| c-Jun S63     | 0.037 | 0.045 | 0.05  | 0.048 | 0.054 |
|               | 0.043 | 0.047 | 0.048 | 0.041 | 0.048 |
|               | 0.049 | 0.05  | 0.058 | 0.053 | 0.101 |
|               | 0.044 | 0.064 | 0.055 | 0.063 | 0.058 |
| PTEN sh4      |       |       |       |       |       |
| PDGFRb Y771   | 0.307 | 0.312 | 0.302 | 0.314 | 0.299 |
|               | 0.326 | 0.317 | 0.297 | 0.304 | 0.296 |
|               | 0.285 | 0.286 | 0.27  | 0.284 | 0.271 |
|               | 0.28  | 0.279 | 0.257 | 0.285 | 0.27  |
| SHC Y317      | 0.444 | 0.441 | 0.521 | 0.539 | 0.499 |
|               | 0.417 | 0.459 | 0.505 | 0.516 | 0.477 |
|               | 0.392 | 0.426 | 0.482 | 0.494 | 0.443 |
|               | 0.392 | 0.395 | 0.42  | 0.481 | 0.439 |
| c-Cbl Y774    | 0.312 | 0.372 | 0.369 | 0.383 | 0.365 |
|               | 0.316 | 0.363 | 0.369 | 0.378 | 0.369 |
|               | 0.365 | 0.384 | 0.368 | 0.384 | 0.367 |
|               | 0.363 | 0.366 | 0.348 | 0.375 | 0.368 |
| Paxillin Y118 | 0.641 | 0.641 | 0.599 | 0.629 | 0.618 |
|               | 0.626 | 0.616 | 0.586 | 0.627 | 0.614 |
|               | 0.615 | 0.61  | 0.58  | 0.634 | 0.624 |
|               | 0.615 | 0.587 | 0.559 | 0.631 | 0.621 |
| AKT S473      | 0.573 | 0.624 | 0.566 | 0.616 | 0.765 |
|               | 0.519 | 0.554 | 0.623 | 0.725 | 0.747 |
|               | 0.566 | 0.545 | 0.658 | 0.599 | 0.668 |
|               | 0.554 | 0.54  | 0.526 | 0.566 | 0.707 |
| GSK-3a/b S21  | 0.497 | 0.546 | 0.615 | 0.686 | 0.72  |
|               | 0.553 | 0.553 | 0.559 | 0.639 | 0.718 |
|               | 0.578 | 0.532 | 0.551 | 0.644 | 0.644 |
|               | 0.559 | 0.512 | 0.477 | 0.588 | 0.677 |
| RPS6 S235/S2  | 0.147 | 0.124 | 0.176 | 0.197 | 0.299 |
|               | 0.144 | 0.14  | 0.127 | 0.18  | 0.317 |
|               | 0.166 | 0.12  | 0.142 | 0.175 | 0.244 |
|               | 0.128 | 0.125 | 0.137 | 0.175 | 0.288 |
| RPS6 S240/S2  | 0.175 | 0.148 | 0.171 | 0.235 | 0.235 |
|               | 0.156 | 0.149 | 0.15  | 0.274 | 0.238 |
|               | 0.158 | 0.144 | 0.168 | 0.207 | 0.187 |
|               | 0.142 | 0.146 | 0.183 | 0.207 | 0.237 |

|              |       |       |        |       |       |
|--------------|-------|-------|--------|-------|-------|
| PKCb S660    | 0.611 | 0.665 | 0.603  | 0.817 | 1.097 |
|              | 0.639 | 0.679 | 0.592  | 0.846 | 1.168 |
|              | 0.612 | 0.637 | 0.568  | 0.746 | 0.986 |
|              | 0.623 | 0.585 | 0.506  | 0.729 | 0.938 |
| PKCd S643    | 0.666 | 0.681 | 0.675  | 0.692 | 0.669 |
|              | 0.668 | 0.65  | 0.668  | 0.696 | 0.678 |
|              | 0.66  | 0.62  | 0.635  | 0.665 | 0.638 |
|              | 0.661 | 0.622 | 0.599  | 0.652 | 0.641 |
| MARCKs S512, | 0.729 | 0.841 | 0.776  | 0.802 | 0.801 |
|              | 0.7   | 0.816 | 0.701  | 0.758 | 0.74  |
|              | 0.664 | 0.776 | 0.694  | 0.754 | 0.719 |
|              | 0.626 | 0.747 | 0.7237 | 0.756 | 0.713 |
| CAMI S81     | 1.242 | 1.118 | 1.041  | 0.991 | 1.092 |
|              | 1.04  | 0.957 | 0.936  | 0.948 | 0.998 |
|              | 0.892 | 0.887 | 0.824  | 0.791 | 0.821 |
|              | 0.856 | 0.771 | 0.714  | 0.733 | 0.776 |
| RSK3 T356/S3 | 0.554 | 0.581 | 0.586  | 0.648 | 0.775 |
|              | 0.563 | 0.554 | 0.558  | 0.63  | 0.751 |
|              | 0.553 | 0.547 | 0.536  | 0.612 | 0.748 |
|              | 0.558 | 0.544 | 0.523  | 0.601 | 0.722 |
| RAF S289/S29 | 0.18  | 0.18  | 0.18   | 0.184 | 0.194 |
|              | 0.185 | 0.182 | 0.175  | 0.178 | 0.184 |
|              | 0.188 | 0.179 | 0.17   | 0.178 | 0.184 |
|              | 0.181 | 0.175 | 0.175  | 0.175 | 0.183 |
| MEK S217/S22 | 0.17  | 0.172 | 0.231  | 0.449 | 0.789 |
|              | 0.187 | 0.171 | 0.232  | 0.523 | 0.72  |
|              | 0.185 | 0.166 | 0.207  | 0.39  | 0.621 |
|              | 0.177 | 0.161 | 0.185  | 0.468 | 0.692 |
| ERK T202/Y20 | 0.359 | 0.353 | 0.445  | 0.756 | 1.068 |
|              | 0.363 | 0.338 | 0.437  | 0.861 | 0.997 |
|              | 0.37  | 0.348 | 0.395  | 0.812 | 0.864 |
|              | 0.348 | 0.321 | 0.381  | 0.83  | 0.948 |
| p90RSK S380  | 0.151 | 0.208 | 0.238  | 0.214 | 0.312 |
|              | 0.157 | 0.227 | 0.236  | 0.226 | 0.353 |
|              | 0.545 | 0.22  | 0.24   | 0.235 | 0.323 |
|              | 0.491 | 0.238 | 0.26   | 0.222 | 0.366 |
| STAT1 Y701   | 0.388 | 0.397 | 0.406  | 0.397 | 0.423 |
|              | 0.412 | 0.407 | 0.404  | 0.387 | 0.428 |
|              | 0.382 | 0.367 | 0.371  | 0.366 | 0.388 |
|              | 0.372 | 0.351 | 0.355  | 0.357 | 0.403 |

|                  |       |       |       |       |       |
|------------------|-------|-------|-------|-------|-------|
| STAT3 Y705       | 0.6   | 0.582 | 0.616 | 0.626 | 0.608 |
|                  | 0.586 | 0.592 | 0.565 | 0.588 | 0.571 |
|                  | 0.589 | 0.568 | 0.558 | 0.585 | 0.567 |
|                  | 0.556 | 0.57  | 0.544 | 0.576 | 0.558 |
| CREB S133        | 0.498 | 0.48  | 0.577 | 0.658 | 0.772 |
|                  | 0.525 | 0.539 | 0.569 | 0.637 | 0.721 |
|                  | 0.458 | 0.466 | 0.533 | 0.598 | 0.686 |
|                  | 0.458 | 0.468 | 0.468 | 0.598 | 0.679 |
| NF-kB S536       | 0.557 | 0.589 | 0.617 | 0.724 | 0.775 |
|                  | 0.556 | 0.591 | 0.615 | 0.736 | 0.821 |
|                  | 0.557 | 0.59  | 0.601 | 0.719 | 0.768 |
|                  | 0.567 | 0.578 | 0.569 | 0.709 | 0.82  |
| c-Jun S63        | 0.064 | 0.069 | 0.068 | 0.072 | 0.09  |
|                  | 0.056 | 0.063 | 0.058 | 0.05  | 0.066 |
|                  | 0.063 | 0.07  | 0.059 | 0.064 | 0.072 |
|                  | 0.059 | 0.057 | 0.047 | 0.061 | 0.069 |
| All phosphatases |       |       |       |       |       |
| PDGFRb Y771      | 0.276 | 0.328 | 0.34  | 0.354 | 0.346 |
|                  | 0.327 | 0.334 | 0.359 | 0.402 | 0.377 |
|                  | 0.299 | 0.32  | 0.333 | 0.367 | 0.343 |
|                  | 0.295 | 0.313 | 0.361 | 0.402 | 0.326 |
| SHC Y317         | 0.526 | 0.535 | 0.538 | 0.582 | 0.581 |
|                  | 0.548 | 0.517 | 0.567 | 0.627 | 0.617 |
|                  | 0.512 | 0.523 | 0.555 | 0.603 | 0.557 |
|                  | 0.518 | 0.522 | 0.58  | 0.64  | 0.585 |
| c-Cbl Y774       | 0.389 | 0.42  | 0.407 | 0.411 | 0.418 |
|                  | 0.435 | 0.414 | 0.421 | 0.425 | 0.426 |
|                  | 0.442 | 0.417 | 0.417 | 0.442 | 0.409 |
|                  | 0.436 | 0.421 | 0.422 | 0.442 | 0.412 |
| Paxillin Y118    | 0.686 | 0.723 | 0.746 | 0.665 | 0.674 |
|                  | 0.747 | 0.71  | 0.75  | 0.73  | 0.732 |
|                  | 0.732 | 0.67  | 0.685 | 0.72  | 0.658 |
|                  | 0.742 | 0.682 | 0.743 | 0.714 | 0.666 |
| AKT S473         | 0.437 | 0.595 | 0.587 | 0.608 | 0.713 |
|                  | 0.542 | 0.486 | 0.56  | 0.743 | 0.67  |
|                  | 0.532 | 0.618 | 0.576 | 0.555 | 0.59  |
|                  | 0.491 | 0.577 | 0.625 | 0.581 | 0.708 |

|              |        |       |        |        |        |
|--------------|--------|-------|--------|--------|--------|
| GSK-3a/b S21 | 0.52   | 0.584 | 0.548  | 0.588  | 0.735  |
|              | 0.525  | 0.562 | 0.534  | 0.655  | 0.741  |
|              | 0.512  | 0.568 | 0.556  | 0.668  | 0.623  |
|              | 0.522  | 0.579 | 0.684  | 0.709  | 0.583  |
| RPS6 S235/S2 | 0.134  | 0.131 | 0.112  | 0.154  | 0.273  |
|              | 0.116  | 0.133 | 0.137  | 0.202  | 0.252  |
|              | 0.124  | 0.14  | 0.132  | 0.135  | 0.24   |
|              | 0.1247 | 0.134 | 0.158  | 0.146  | 0.221  |
| RPS6 S240/S2 | 0.117  | 0.1   | 0.094  | 0.125  | 0.12   |
|              | 0.094  | 0.114 | 0.108  | 0.118  | 0.134  |
|              | 0.113  | 0.113 | 0.118  | 0.098  | 0.13   |
|              | 0.108  | 0.112 | 0.112  | 0.114  | 0.116  |
| PKCb S660    | 0.61   | 0.615 | 0.64   | 0.732  | 1.023  |
|              | 0.61   | 0.61  | 0.652  | 0.772  | 1.069  |
|              | 0.61   | 0.597 | 0.654  | 0.781  | 0.976  |
|              | 0.61   | 0.608 | 0.662  | 0.84   | 0.993  |
| PKCd S643    | 0.7657 | 0.771 | 0.755  | 0.697  | 0.768  |
|              | 0.802  | 0.792 | 0.793  | 0.75   | 0.811  |
|              | 0.759  | 0.746 | 0.783  | 0.7287 | 0.748  |
|              | 0.736  | 0.758 | 0.77   | 0.739  | 0.744  |
| MARCKs S512, | 0.508  | 0.664 | 0.622  | 0.739  | 0.723  |
|              | 0.553  | 0.539 | 0.615  | 0.731  | 0.695  |
|              | 0.629  | 0.612 | 0.635  | 0.755  | 0.669  |
|              | 0.603  | 0.746 | 0.93   | 0.699  | 0.791  |
| CAMI S81     | 0.471  | 0.49  | 0.411  | 0.517  | 0.425  |
|              | 0.609  | 0.547 | 0.599  | 0.727  | 0.631  |
|              | 0.576  | 0.495 | 0.523  | 0.449  | 0.423  |
|              | 0.623  | 0.563 | 0.655  | 0.614  | 0.587  |
| RSK3 T356/S3 | 0.543  | 0.609 | 0.63   | 0.705  | 0.846  |
|              | 0.581  | 0.592 | 0.622  | 0.775  | 0.88   |
|              | 0.591  | 0.594 | 0.656  | 0.744  | 0.859  |
|              | 0.548  | 0.585 | 0.704  | 0.744  | 0.922  |
| RAF S289/S29 | 0.18   | 0.192 | 0.187  | 0.1943 | 0.204  |
|              | 0.2    | 0.191 | 0.194  | 0.203  | 0.222  |
|              | 0.184  | 0.162 | 0.155  | 0.19   | 0.2037 |
|              | 0.149  | 0.17  | 0.1787 | 0.19   | 0.185  |
| MEK S217/S2  | 0.168  | 0.185 | 0.396  | 0.478  | 1.052  |
|              | 0.181  | 0.174 | 0.319  | 0.5    | 0.983  |
|              | 0.182  | 0.19  | 0.418  | 0.572  | 1.012  |

|              |         |       |       |        |        |
|--------------|---------|-------|-------|--------|--------|
|              | 0.181   | 0.194 | 0.409 | 0.523  | 0.998  |
| ERK T202/Y20 | 0.34    | 0.357 | 0.634 | 0.826  | 1.098  |
|              | 0.372   | 0.354 | 0.566 | 0.808  | 1.069  |
|              | 0.39    | 0.36  | 0.681 | 0.752  | 1.019  |
|              | 0.386   | 0.362 | 0.661 | 0.733  | 1.006  |
| p90RSK S380  | 0.312   | 0.263 | 0.353 | 0.319  | 0.704  |
|              | 0.276   | 0.257 | 0.356 | 0.299  | 0.721  |
|              | 0.3153  | 0.297 | 0.263 | 0.472  | 0.357  |
|              | 0.358   | 0.275 | 0.257 | 0.332  | 0.299  |
| STAT1 Y701   | 0.392   | 0.419 | 0.446 | 0.391  | 0.48   |
|              | 0.443   | 0.42  | 0.448 | 0.411  | 0.55   |
|              | 0.402   | 0.418 | 0.424 | 0.424  | 0.471  |
|              | 0.406   | 0.402 | 0.441 | 0.484  | 0.477  |
| STAT3 Y705   | 0.572   | 0.673 | 0.667 | 0.661  | 0.655  |
|              | 0.627   | 0.681 | 0.706 | 0.684  | 0.716  |
|              | 0.611   | 0.671 | 0.646 | 0.67   | 0.661  |
|              | 0.607   | 0.629 | 0.672 | 0.706  | 0.652  |
| CREB S133    | 0.586   | 0.693 | 0.756 | 0.758  | 1.068  |
|              | 0.737   | 0.679 | 0.78  | 0.835  | 1.024  |
|              | 0.71    | 0.586 | 0.742 | 0.885  | 0.99   |
|              | 0.721   | 0.651 | 0.825 | 1.001  | 1.076  |
| NF-kB S536   | 0.685   | 0.812 | 0.849 | 0.912  | 1.024  |
|              | 0.729   | 0.757 | 0.804 | 0.921  | 0.987  |
|              | 0.802   | 0.832 | 0.919 | 0.992  | 1.036  |
|              | 0.735   | 0.754 | 0.864 | 0.99   | 0.945  |
| c-Jun S63    | 0.047   | 0.06  | 0.054 | 0.064  | 0.072  |
|              | 0.051   | 0.056 | 0.057 | 0.0603 | 0.071  |
|              | 0.06    | 0.063 | 0.058 | 0.054  | 0.057  |
|              | 0.06    | 0.069 | 0.067 | 0.063  | 0.0667 |
|              | GRB sh3 |       |       |        |        |
| PDGFRb Y771  | 0.256   | 0.244 | 0.245 | 0.261  | 0.26   |
|              | 0.256   | 0.255 | 0.248 | 0.263  | 0.257  |
|              | 0.278   | 0.271 | 0.285 | 0.301  | 0.291  |
|              | 0.281   | 0.287 | 0.272 | 0.285  | 0.281  |
| SHC Y317     | 0.376   | 0.455 | 0.466 | 0.472  | 0.466  |
|              | 0.377   | 0.462 | 0.47  | 0.467  | 0.465  |
|              | 0.412   | 0.47  | 0.491 | 0.511  | 0.506  |

|               |        |        |       |       |       |
|---------------|--------|--------|-------|-------|-------|
|               | 0.415  | 0.508  | 0.5   | 0.506 | 0.477 |
| c-Cbl Y774    | 0.3747 | 0.389  | 0.341 | 0.348 | 0.341 |
|               | 0.372  | 0.378  | 0.343 | 0.346 | 0.333 |
|               | 0.378  | 0.375  | 0.357 | 0.362 | 0.368 |
|               | 0.374  | 0.395  | 0.351 | 0.364 | 0.338 |
| Paxillin Y118 | 0.634  | 0.659  | 0.618 | 0.592 | 0.599 |
|               | 0.661  | 0.659  | 0.608 | 0.587 | 0.586 |
|               | 0.68   | 0.677  | 0.649 | 0.636 | 0.641 |
|               | 0.672  | 0.709  | 0.63  | 0.63  | 0.626 |
| AKT S473      | 0.66   | 0.65   | 0.758 | 0.845 | 0.773 |
|               | 0.69   | 0.635  | 0.736 | 0.819 | 0.9   |
|               | 0.703  | 0.781  | 0.679 | 0.754 | 0.801 |
|               | 0.668  | 0.772  | 0.739 | 0.782 | 0.784 |
| GSK-3a/b S21  | 0.568  | 0.677  | 0.618 | 0.729 | 0.671 |
|               | 0.609  | 0.671  | 0.622 | 0.744 | 0.684 |
|               | 0.664  | 0.649  | 0.63  | 0.712 | 0.637 |
|               | 0.604  | 0.6657 | 0.636 | 0.753 | 0.664 |
| RPS6 S235/S2  | 0.1867 | 0.176  | 0.215 | 0.207 | 0.323 |
|               | 0.187  | 0.176  | 0.198 | 0.246 | 0.34  |
|               | 0.198  | 0.176  | 0.19  | 0.208 | 0.316 |
|               | 0.175  | 0.188  | 0.198 | 0.214 | 0.311 |
| RPS6 S240/S2  | 0.272  | 0.225  | 0.242 | 0.298 | 0.332 |
|               | 0.234  | 0.213  | 0.24  | 0.31  | 0.361 |
|               | 0.244  | 0.244  | 0.243 | 0.265 | 0.29  |
|               | 0.227  | 0.252  | 0.239 | 0.264 | 0.281 |
| PKCb S660     | 0.536  | 0.557  | 0.525 | 0.696 | 0.833 |
|               | 0.539  | 0.582  | 0.523 | 0.689 | 0.855 |
|               | 0.6    | 0.596  | 0.548 | 0.653 | 0.869 |
|               | 0.578  | 0.621  | 0.531 | 0.686 | 0.836 |
| PKCd S643     | 0.607  | 0.667  | 0.606 | 0.629 | 0.633 |
|               | 0.611  | 0.652  | 0.607 | 0.631 | 0.624 |
|               | 0.667  | 0.653  | 0.652 | 0.712 | 0.716 |
|               | 0.665  | 0.734  | 0.648 | 0.681 | 0.661 |
| MARCKs S512,  | 0.582  | 0.55   | 0.638 | 0.568 | 0.577 |
|               | 0.587  | 0.7    | 0.644 | 0.558 | 0.521 |
|               | 0.628  | 0.655  | 0.619 | 0.589 | 0.55  |
|               | 0.617  | 0.681  | 0.648 | 0.605 | 0.528 |
| CAMI S81      | 0.6    | 0.664  | 0.608 | 0.537 | 0.585 |
|               | 0.63   | 0.602  | 0.614 | 0.509 | 0.555 |

|                |       |        |        |       |       |
|----------------|-------|--------|--------|-------|-------|
|                | 0.68  | 0.628  | 0.683  | 0.611 | 0.646 |
|                | 0.649 | 0.715  | 0.666  | 0.593 | 0.588 |
| RSK3 T356/S357 | 0.509 | 0.524  | 0.493  | 0.551 | 0.625 |
|                | 0.527 | 0.528  | 0.499  | 0.556 | 0.606 |
|                | 0.538 | 0.542  | 0.508  | 0.594 | 0.646 |
|                | 0.526 | 0.567  | 0.517  | 0.586 | 0.611 |
| RAF S289/S291  | 0.164 | 0.182  | 0.172  | 0.165 | 0.182 |
|                | 0.168 | 0.183  | 0.173  | 0.169 | 0.177 |
|                | 0.184 | 0.192  | 0.182  | 0.165 | 0.182 |
|                | 0.178 | 0.1857 | 0.185  | 0.174 | 0.176 |
| MEK S217/S218  | 0.162 | 0.171  | 0.189  | 0.376 | 0.446 |
|                | 0.17  | 0.178  | 0.192  | 0.361 | 0.409 |
|                | 0.207 | 0.208  | 0.209  | 0.359 | 0.439 |
|                | 0.212 | 0.197  | 0.204  | 0.375 | 0.417 |
| ERK T202/Y204  | 0.415 | 0.412  | 0.375  | 0.759 | 0.768 |
|                | 0.409 | 0.395  | 0.385  | 0.785 | 0.752 |
|                | 0.413 | 0.396  | 0.392  | 0.798 | 0.839 |
|                | 0.371 | 0.398  | 0.396  | 0.83  | 0.772 |
| p90RSK S380    | 0.441 | 0.238  | 0.272  | 0.252 | 0.379 |
|                | 0.402 | 0.251  | 0.288  | 0.264 | 0.405 |
|                | 0.526 | 0.287  | 0.269  | 0.248 | 0.351 |
|                | 0.48  | 0.258  | 0.294  | 0.259 | 0.384 |
| STAT1 Y701     | 0.384 | 0.403  | 0.389  | 0.411 | 0.474 |
|                | 0.387 | 0.41   | 0.392  | 0.41  | 0.479 |
|                | 0.396 | 0.405  | 0.403  | 0.43  | 0.506 |
|                | 0.399 | 0.428  | 0.409  | 0.428 | 0.489 |
| STAT3 Y705     | 0.578 | 0.618  | 0.614  | 0.577 | 0.589 |
|                | 0.603 | 0.615  | 0.606  | 0.591 | 0.603 |
|                | 0.621 | 0.646  | 0.604  | 0.628 | 0.615 |
|                | 0.623 | 0.6263 | 0.647  | 0.595 | 0.617 |
| CREB S133      | 0.496 | 0.453  | 0.503  | 0.588 | 0.667 |
|                | 0.508 | 0.539  | 0.521  | 0.583 | 0.671 |
|                | 0.552 | 0.537  | 0.579  | 0.684 | 0.76  |
|                | 0.54  | 0.646  | 0.584  | 0.677 | 0.72  |
| NF-kB S536     | 0.572 | 0.576  | 0.666  | 0.842 | 0.922 |
|                | 0.602 | 0.625  | 0.649  | 0.833 | 0.892 |
|                | 0.586 | 0.582  | 0.6553 | 0.831 | 0.923 |
|                | 0.572 | 0.629  | 0.651  | 0.834 | 0.847 |
| c-Jun S63      | 0.031 | 0.038  | 0.031  | 0.032 | 0.036 |

|       |       |       |       |       |
|-------|-------|-------|-------|-------|
| 0.033 | 0.04  | 0.032 | 0.038 | 0.033 |
| 0.039 | 0.035 | 0.039 | 0.041 | 0.04  |
| 0.037 | 0.045 | 0.034 | 0.037 | 0.035 |

GRB sh4

|             |       |        |       |       |       |
|-------------|-------|--------|-------|-------|-------|
| PDGFRb Y771 | 0.313 | 0.32   | 0.301 | 0.306 | 0.304 |
|             | 0.314 | 0.2993 | 0.293 | 0.3   | 0.297 |
|             | 0.295 | 0.289  | 0.281 | 0.278 | 0.267 |
|             | 0.29  | 0.289  | 0.269 | 0.274 | 0.274 |

|          |       |       |       |       |       |
|----------|-------|-------|-------|-------|-------|
| SHC Y317 | 0.45  | 0.525 | 0.546 | 0.505 | 0.52  |
|          | 0.429 | 0.538 | 0.49  | 0.496 | 0.503 |
|          | 0.43  | 0.469 | 0.486 | 0.471 | 0.45  |
|          | 0.416 | 0.478 | 0.463 | 0.462 | 0.464 |

|            |       |       |       |       |       |
|------------|-------|-------|-------|-------|-------|
| c-Cbl Y774 | 0.309 | 0.414 | 0.426 | 0.413 | 0.379 |
|            | 0.322 | 0.411 | 0.416 | 0.412 | 0.379 |
|            | 0.401 | 0.415 | 0.421 | 0.409 | 0.376 |
|            | 0.401 | 0.43  | 0.43  | 0.414 | 0.378 |

|               |       |       |       |       |       |
|---------------|-------|-------|-------|-------|-------|
| Paxillin Y118 | 0.658 | 0.748 | 0.699 | 0.708 | 0.693 |
|               | 0.667 | 0.722 | 0.618 | 0.681 | 0.683 |
|               | 0.703 | 0.679 | 0.666 | 0.674 | 0.68  |
|               | 0.677 | 0.711 | 0.669 | 0.676 | 0.662 |

|          |       |       |       |       |       |
|----------|-------|-------|-------|-------|-------|
| AKT S473 | 0.454 | 0.63  | 0.546 | 0.609 | 0.6   |
|          | 0.451 | 0.549 | 0.537 | 0.631 | 0.768 |
|          | 0.505 | 0.534 | 0.503 | 0.47  | 0.644 |
|          | 0.465 | 0.558 | 0.521 | 0.475 | 0.687 |

|              |       |       |       |       |       |
|--------------|-------|-------|-------|-------|-------|
| GSK-3a/b S21 | 0.433 | 0.546 | 0.56  | 0.555 | 0.545 |
|              | 0.495 | 0.537 | 0.512 | 0.554 | 0.549 |
|              | 0.477 | 0.453 | 0.464 | 0.49  | 0.461 |
|              | 0.459 | 0.489 | 0.481 | 0.524 | 0.488 |

|              |       |       |       |       |       |
|--------------|-------|-------|-------|-------|-------|
| RPS6 S235/S2 | 0.104 | 0.09  | 0.103 | 0.123 | 0.237 |
|              | 0.12  | 0.09  | 0.122 | 0.148 | 0.237 |
|              | 0.121 | 0.08  | 0.094 | 0.11  | 0.175 |
|              | 0.093 | 0.113 | 0.103 | 0.127 | 0.213 |

|              |       |       |       |       |       |
|--------------|-------|-------|-------|-------|-------|
| RPS6 S240/S2 | 0.081 | 0.101 | 0.12  | 0.145 | 0.182 |
|              | 0.111 | 0.1   | 0.135 | 0.164 | 0.206 |
|              | 0.133 | 0.108 | 0.118 | 0.131 | 0.158 |
|              | 0.105 | 0.138 | 0.13  | 0.146 | 0.176 |

|           |       |       |      |      |       |
|-----------|-------|-------|------|------|-------|
| PKCb S660 | 0.593 | 0.577 | 0.59 | 0.71 | 0.835 |
|-----------|-------|-------|------|------|-------|

|              |        |        |       |       |       |
|--------------|--------|--------|-------|-------|-------|
|              | 0.599  | 0.589  | 0.574 | 0.723 | 0.851 |
|              | 0.598  | 0.52   | 0.518 | 0.623 | 0.695 |
|              | 0.563  | 0.518  | 0.514 | 0.634 | 0.726 |
| PKCd S643    | 0.713  | 0.689  | 0.699 | 0.734 | 0.673 |
|              | 0.691  | 0.689  | 0.691 | 0.745 | 0.662 |
|              | 0.695  | 0.68   | 0.687 | 0.71  | 0.627 |
|              | 0.693  | 0.698  | 0.664 | 0.71  | 0.625 |
| MARCKs S512, | 0.829  | 0.876  | 0.858 | 0.795 | 0.609 |
|              | 0.817  | 0.947  | 0.741 | 0.702 | 0.606 |
|              | 0.789  | 0.797  | 0.749 | 0.736 | 0.589 |
|              | 0.766  | 0.814  | 0.732 | 0.744 | 0.582 |
| CAMI S81     | 1.038  | 0.974  | 0.829 | 0.803 | 0.905 |
|              | 1.099  | 1.042  | 0.869 | 0.916 | 0.904 |
|              | 0.863  | 0.678  | 0.726 | 0.788 | 0.681 |
|              | 0.643  | 0.649  | 0.622 | 0.751 | 0.696 |
| RSK3 T356/S3 | 0.51   | 0.5447 | 0.544 | 0.591 | 0.68  |
|              | 0.518  | 0.544  | 0.536 | 0.593 | 0.702 |
|              | 0.526  | 0.534  | 0.534 | 0.575 | 0.652 |
|              | 0.541  | 0.556  | 0.543 | 0.592 | 0.654 |
| RAF S289/S29 | 0.188  | 0.211  | 0.212 | 0.205 | 0.195 |
|              | 0.193  | 0.211  | 0.194 | 0.188 | 0.191 |
|              | 0.204  | 0.202  | 0.19  | 0.187 | 0.198 |
|              | 0.182  | 0.21   | 0.205 | 0.186 | 0.184 |
| MEK S217/S22 | 0.163  | 0.188  | 0.201 | 0.391 | 0.42  |
|              | 0.171  | 0.187  | 0.203 | 0.406 | 0.484 |
|              | 0.193  | 0.184  | 0.195 | 0.362 | 0.442 |
|              | 0.185  | 0.187  | 0.196 | 0.375 | 0.431 |
| ERK T202/Y20 | 0.366  | 0.413  | 0.44  | 0.779 | 0.959 |
|              | 0.407  | 0.405  | 0.444 | 0.731 | 0.962 |
|              | 0.3853 | 0.39   | 0.401 | 0.615 | 0.803 |
|              | 0.383  | 0.399  | 0.403 | 0.69  | 0.839 |
| p90RSK S380  | 0.144  | 0.201  | 0.226 | 0.233 | 0.268 |
|              | 0.144  | 0.218  | 0.24  | 0.223 | 0.333 |
|              | 0.404  | 0.249  | 0.252 | 0.265 | 0.339 |
|              | 0.398  | 0.243  | 0.247 | 0.256 | 0.364 |
| STAT1 Y701   | 0.388  | 0.431  | 0.441 | 0.46  | 0.484 |
|              | 0.407  | 0.442  | 0.432 | 0.462 | 0.482 |
|              | 0.401  | 0.404  | 0.415 | 0.425 | 0.42  |
|              | 0.401  | 0.417  | 0.403 | 0.432 | 0.428 |

|               |                      |       |       |       |       |
|---------------|----------------------|-------|-------|-------|-------|
| STAT3 Y705    | 0.597                | 0.599 | 0.607 | 0.614 | 0.597 |
|               | 0.5853               | 0.612 | 0.604 | 0.617 | 0.588 |
|               | 0.573                | 0.59  | 0.6   | 0.599 | 0.573 |
|               | 0.586                | 0.587 | 0.589 | 0.605 | 0.573 |
| CREB S133     | 0.533                | 0.501 | 0.59  | 0.696 | 0.784 |
|               | 0.534                | 0.579 | 0.572 | 0.705 | 0.797 |
|               | 0.507                | 0.492 | 0.568 | 0.647 | 0.652 |
|               | 0.541                | 0.564 | 0.56  | 0.645 | 0.724 |
| NF-kB S536    | 0.617                | 0.636 | 0.591 | 0.689 | 0.721 |
|               | 0.629                | 0.623 | 0.612 | 0.724 | 0.712 |
|               | 0.658                | 0.633 | 0.607 | 0.653 | 0.673 |
|               | 0.625                | 0.658 | 0.573 | 0.663 | 0.697 |
| c-Jun S63     | 0.052                | 0.072 | 0.06  | 0.05  | 0.056 |
|               | 0.053                | 0.072 | 0.051 | 0.046 | 0.054 |
|               | 0.054                | 0.056 | 0.053 | 0.042 | 0.045 |
|               | 0.048                | 0.068 | 0.056 | 0.047 | 0.045 |
| PDGFRb Y771   | SHC1 52 sh2<br>0.288 | 0.285 | 0.346 | 0.338 | 0.342 |
|               | 0.312                | 0.29  | 0.316 | 0.322 | 0.323 |
|               | 0.294                | 0.271 | 0.283 | 0.295 | 0.299 |
|               | 0.294                | 0.306 | 0.386 | 0.376 | 0.312 |
| SHC Y317      | 0.244                | 0.259 | 0.294 | 0.284 | 0.29  |
|               | 0.276                | 0.268 | 0.279 | 0.269 | 0.297 |
|               | 0.269                | 0.245 | 0.229 | 0.245 | 0.258 |
|               | 0.244                | 0.256 | 0.276 | 0.284 | 0.264 |
| c-Cbl Y774    | 0.442                | 0.389 | 0.416 | 0.405 | 0.449 |
|               | 0.495                | 0.415 | 0.421 | 0.386 | 0.453 |
|               | 0.449                | 0.385 | 0.396 | 0.38  | 0.431 |
|               | 0.452                | 0.394 | 0.406 | 0.414 | 0.423 |
| Paxillin Y118 | 0.761                | 0.624 | 0.685 | 0.706 | 0.715 |
|               | 0.813                | 0.656 | 0.657 | 0.641 | 0.72  |
|               | 0.758                | 0.69  | 0.668 | 0.711 | 0.679 |
|               | 0.886                | 0.768 | 0.703 | 0.679 | 0.76  |
| AKT S473      | 0.451                | 0.438 | 0.525 | 0.554 | 0.558 |
|               | 0.479                | 0.455 | 0.522 | 0.545 | 0.548 |
|               | 0.494                | 0.522 | 0.48  | 0.542 | 0.617 |
|               | 0.489                | 0.494 | 0.506 | 0.481 | 0.612 |

|              |        |       |       |        |       |
|--------------|--------|-------|-------|--------|-------|
| GSK-3a/b S21 | 0.605  | 0.564 | 0.545 | 0.506  | 0.67  |
|              | 0.536  | 0.6   | 0.554 | 0.51   | 0.686 |
|              | 0.758  | 0.745 | 0.697 | 0.681  | 0.841 |
|              | 0.666  | 0.694 | 0.716 | 0.853  | 0.685 |
| RPS6 S235/S2 | 0.096  | 0.12  | 0.116 | 0.119  | 0.167 |
|              | 0.081  | 0.122 | 0.134 | 0.131  | 0.175 |
|              | 0.1    | 0.112 | 0.12  | 0.111  | 0.142 |
|              | 0.095  | 0.138 | 0.116 | 0.144  | 0.153 |
| RPS6 S240/S2 | 0.081  | 0.088 | 0.094 | 0.094  | 0.077 |
|              | 0.053  | 0.092 | 0.096 | 0.0917 | 0.095 |
|              | 0.074  | 0.09  | 0.102 | 0.092  | 0.085 |
|              | 0.071  | 0.094 | 0.092 | 0.089  | 0.096 |
| PKCb S660    | 0.583  | 0.591 | 0.653 | 0.704  | 0.914 |
|              | 0.594  | 0.601 | 0.638 | 0.698  | 0.9   |
|              | 0.5827 | 0.58  | 0.57  | 0.623  | 0.76  |
|              | 0.571  | 0.598 | 0.663 | 0.725  | 0.822 |
| PKCd S643    | 0.73   | 0.761 | 0.783 | 0.766  | 0.772 |
|              | 0.734  | 0.764 | 0.762 | 0.735  | 0.753 |
|              | 0.697  | 0.773 | 0.69  | 0.734  | 0.692 |
|              | 0.689  | 0.713 | 0.733 | 0.709  | 0.673 |
| MARCKs S512, | 0.488  | 0.486 | 0.596 | 0.562  | 0.575 |
|              | 0.514  | 0.516 | 0.585 | 0.541  | 0.581 |
|              | 0.626  | 0.721 | 0.718 | 0.766  | 0.665 |
|              | 0.773  | 0.782 | 0.783 | 0.667  | 0.78  |
| CAMI S81     | 0.48   | 0.449 | 0.55  | 0.551  | 0.565 |
|              | 0.525  | 0.469 | 0.508 | 0.495  | 0.542 |
|              | 0.477  | 0.445 | 0.483 | 0.523  | 0.491 |
|              | 0.584  | 0.549 | 0.654 | 0.523  | 0.571 |
| RSK3 T356/S3 | 0.553  | 0.51  | 0.629 | 0.63   | 0.813 |
|              | 0.542  | 0.537 | 0.626 | 0.638  | 0.823 |
|              | 0.583  | 0.554 | 0.622 | 0.665  | 0.774 |
|              | 0.59   | 0.526 | 0.643 | 0.66   | 0.778 |
| RAF S289/S29 | 0.176  | 0.176 | 0.19  | 0.194  | 0.193 |
|              | 0.184  | 0.189 | 0.186 | 0.189  | 0.191 |
|              | 0.194  | 0.195 | 0.189 | 0.2    | 0.196 |
|              | 0.203  | 0.188 | 0.183 | 0.18   | 0.198 |
| MEK S217/S2  | 0.168  | 0.174 | 0.443 | 0.486  | 1.22  |
|              | 0.172  | 0.18  | 0.412 | 0.492  | 1.155 |
|              | 0.177  | 0.19  | 0.353 | 0.477  | 0.9   |
|              | 0.191  | 0.212 | 0.438 | 0.592  | 1.092 |

|              |                      |       |        |       |       |
|--------------|----------------------|-------|--------|-------|-------|
| ERK T202/Y20 | 0.381                | 0.355 | 0.694  | 0.838 | 0.967 |
|              | 0.381                | 0.36  | 0.66   | 0.836 | 0.935 |
|              | 0.38                 | 0.348 | 0.616  | 0.811 | 0.813 |
|              | 0.387                | 0.344 | 0.634  | 0.8   | 0.84  |
| p90RSK S380  | 0.437                | 0.314 | 0.247  | 0.283 | 0.376 |
|              | 0.383                | 0.303 | 0.289  | 0.309 | 0.396 |
|              | 0.425                | 0.322 | 0.333  | 0.399 | 0.414 |
|              | 0.415                | 0.347 | 0.328  | 0.378 | 0.477 |
| STAT1 Y701   | 0.387                | 0.402 | 0.429  | 0.446 | 0.448 |
|              | 0.432                | 0.415 | 0.395  | 0.434 | 0.479 |
|              | 0.372                | 0.406 | 0.379  | 0.405 | 0.417 |
|              | 0.389                | 0.414 | 0.439  | 0.448 | 0.444 |
| STAT3 Y705   | 0.614                | 0.612 | 0.644  | 0.627 | 0.604 |
|              | 0.653                | 0.592 | 0.608  | 0.597 | 0.616 |
|              | 0.639                | 0.629 | 0.6473 | 0.641 | 0.599 |
|              | 0.674                | 0.664 | 0.69   | 0.685 | 0.634 |
| CREB S133    | 0.707                | 0.601 | 0.846  | 0.861 | 1.044 |
|              | 0.804                | 0.604 | 0.794  | 0.799 | 0.952 |
|              | 0.694                | 0.578 | 0.689  | 0.733 | 0.797 |
|              | 0.761                | 0.591 | 0.798  | 0.769 | 0.833 |
| NF-kB S536   | 0.767                | 0.787 | 0.832  | 0.921 | 1.005 |
|              | 0.783                | 0.803 | 0.85   | 0.917 | 1.003 |
|              | 0.8                  | 0.802 | 0.786  | 0.907 | 0.959 |
|              | 0.836                | 0.867 | 0.953  | 0.937 | 1.01  |
| c-Jun S63    | 0.055                | 0.051 | 0.054  | 0.049 | 0.069 |
|              | 0.057                | 0.059 | 0.063  | 0.059 | 0.061 |
|              | 0.055                | 0.057 | 0.056  | 0.057 | 0.064 |
|              | 0.062                | 0.064 | 0.075  | 0.066 | 0.07  |
| PDGFRb Y771  | SHC1 52 sh3<br>0.288 | 0.298 | 0.347  | 0.345 | 0.35  |
|              | 0.311                | 0.294 | 0.339  | 0.343 | 0.353 |
|              | 0.305                | 0.322 | 0.33   | 0.344 | 0.345 |
|              | 0.287                | 0.303 | 0.32   | 0.316 | 0.324 |
| SHC Y317     | 0.222                | 0.258 | 0.308  | 0.287 | 0.272 |
|              | 0.251                | 0.261 | 0.302  | 0.311 | 0.298 |
|              | 0.28                 | 0.291 | 0.272  | 0.302 | 0.288 |
|              | 0.238                | 0.252 | 0.274  | 0.257 | 0.286 |

|               |        |        |       |        |       |
|---------------|--------|--------|-------|--------|-------|
| c-Cbl Y774    | 0.415  | 0.386  | 0.409 | 0.408  | 0.411 |
|               | 0.466  | 0.442  | 0.454 | 0.45   | 0.448 |
|               | 0.441  | 0.417  | 0.4   | 0.422  | 0.407 |
|               | 0.475  | 0.429  | 0.437 | 0.426  | 0.433 |
| Paxillin Y118 | 0.692  | 0.594  | 0.639 | 0.626  | 0.672 |
|               | 0.692  | 0.646  | 0.7   | 0.69   | 0.669 |
|               | 0.682  | 0.649  | 0.634 | 0.643  | 0.603 |
|               | 0.6887 | 0.678  | 0.724 | 0.689  | 0.661 |
| AKT S473      | 0.423  | 0.506  | 0.551 | 0.576  | 0.617 |
|               | 0.526  | 0.557  | 0.612 | 0.613  | 0.598 |
|               | 0.43   | 0.479  | 0.429 | 0.504  | 0.603 |
|               | 0.496  | 0.523  | 0.571 | 0.611  | 0.678 |
| GSK-3a/b S21  | 0.383  | 0.542  | 0.578 | 0.482  | 0.563 |
|               | 0.48   | 0.616  | 0.539 | 0.582  | 0.6   |
|               | 0.563  | 0.505  | 0.598 | 0.637  | 0.549 |
|               | 0.699  | 0.5543 | 0.74  | 0.826  | 0.861 |
| RPS6 S235/S2  | 0.0953 | 0.107  | 0.097 | 0.118  | 0.142 |
|               | 0.081  | 0.114  | 0.125 | 0.163  | 0.154 |
|               | 0.095  | 0.097  | 0.088 | 0.104  | 0.144 |
|               | 0.11   | 0.115  | 0.115 | 0.151  | 0.17  |
| RPS6 S240/S2  | 0.035  | 0.109  | 0.108 | 0.127  | 0.096 |
|               | 0.071  | 0.108  | 0.122 | 0.15   | 0.12  |
|               | 0.064  | 0.08   | 0.074 | 0.092  | 0.092 |
|               | 0.089  | 0.103  | 0.099 | 0.12   | 0.122 |
| PKCb S660     | 0.605  | 0.62   | 0.64  | 0.752  | 0.937 |
|               | 0.623  | 0.613  | 0.642 | 0.738  | 0.929 |
|               | 0.651  | 0.665  | 0.616 | 0.788  | 0.958 |
|               | 0.597  | 0.585  | 0.565 | 0.688  | 0.835 |
| PKCd S643     | 0.757  | 0.812  | 0.818 | 0.827  | 0.798 |
|               | 0.766  | 0.739  | 0.785 | 0.815  | 0.774 |
|               | 0.744  | 0.778  | 0.737 | 0.804  | 0.743 |
|               | 0.726  | 0.725  | 0.76  | 0.766  | 0.727 |
| MARCKs S512,  | 0.53   | 0.513  | 0.534 | 0.576  | 0.578 |
|               | 0.551  | 0.552  | 0.575 | 0.619  | 0.605 |
|               | 0.556  | 0.608  | 0.51  | 0.612  | 0.56  |
|               | 0.585  | 0.616  | 0.584 | 0.6023 | 0.588 |
| CAMI S81      | 0.633  | 0.547  | 0.624 | 0.609  | 0.595 |
|               | 0.576  | 0.522  | 0.591 | 0.59   | 0.632 |
|               | 0.553  | 0.543  | 0.523 | 0.595  | 0.596 |

|              |       |       |       |       |        |
|--------------|-------|-------|-------|-------|--------|
|              | 0.497 | 0.479 | 0.496 | 0.501 | 0.52   |
| RSK3 T356/S3 | 0.544 | 0.508 | 0.616 | 0.666 | 0.77   |
|              | 0.608 | 0.556 | 0.689 | 0.753 | 0.871  |
|              | 0.604 | 0.531 | 0.552 | 0.656 | 0.729  |
|              | 0.643 | 0.603 | 0.662 | 0.744 | 0.824  |
| RAF S289/S29 | 0.189 | 0.182 | 0.186 | 0.191 | 0.197  |
|              | 0.203 | 0.185 | 0.205 | 0.212 | 0.221  |
|              | 0.202 | 0.195 | 0.181 | 0.201 | 0.195  |
|              | 0.208 | 0.206 | 0.205 | 0.213 | 0.222  |
| MEK S217/S2  | 0.15  | 0.187 | 0.389 | 0.461 | 0.922  |
|              | 0.175 | 0.207 | 0.419 | 0.511 | 0.96   |
|              | 0.178 | 0.191 | 0.338 | 0.507 | 0.782  |
|              | 0.208 | 0.2   | 0.418 | 0.481 | 0.944  |
| ERK T202/Y20 | 0.346 | 0.36  | 0.674 | 0.747 | 0.894  |
|              | 0.416 | 0.436 | 0.753 | 0.862 | 0.974  |
|              | 0.377 | 0.35  | 0.577 | 0.792 | 0.823  |
|              | 0.434 | 0.386 | 0.696 | 0.851 | 0.952  |
| p90RSK S380  | 0.367 | 0.288 | 0.239 | 0.25  | 0.106  |
|              | 0.356 | 0.312 | 0.283 | 0.31  | 0.326  |
|              | 0.379 | 0.266 | 0.296 | 0.338 | 0.443  |
|              | 0.366 | 0.323 | 0.323 | 0.36  | 0.2917 |
| STAT1 Y701   | 0.411 | 0.411 | 0.427 | 0.425 | 0.48   |
|              | 0.43  | 0.412 | 0.422 | 0.436 | 0.477  |
|              | 0.428 | 0.435 | 0.421 | 0.451 | 0.484  |
|              | 0.392 | 0.407 | 0.437 | 0.419 | 0.468  |
| STAT3 Y705   | 0.58  | 0.658 | 0.635 | 0.653 | 0.61   |
|              | 0.595 | 0.664 | 0.643 | 0.694 | 0.63   |
|              | 0.643 | 0.687 | 0.625 | 0.695 | 0.643  |
|              | 0.609 | 0.644 | 0.618 | 0.651 | 0.616  |
| CREB S133    | 0.687 | 0.607 | 0.891 | 0.885 | 1.089  |
|              | 0.767 | 0.593 | 0.872 | 0.858 | 1.042  |
|              | 0.868 | 0.692 | 0.844 | 0.948 | 1.029  |
|              | 0.737 | 0.62  | 0.769 | 0.791 | 0.886  |
| NF-kB S536   | 0.657 | 0.724 | 0.77  | 0.766 | 0.8    |
|              | 0.745 | 0.767 | 0.835 | 0.844 | 0.861  |
|              | 0.711 | 0.745 | 0.749 | 0.834 | 0.826  |
|              | 0.76  | 0.786 | 0.854 | 0.88  | 0.89   |
| c-Jun S63    | 0.044 | 0.046 | 0.047 | 0.046 | 0.059  |
|              | 0.04  | 0.056 | 0.063 | 0.06  | 0.066  |

|       |       |       |       |       |
|-------|-------|-------|-------|-------|
| 0.051 | 0.065 | 0.052 | 0.059 | 0.063 |
| 0.065 | 0.074 | 0.063 | 0.054 | 0.079 |

SRC sh1

|               |        |       |        |       |       |
|---------------|--------|-------|--------|-------|-------|
| PDGFRb Y771   | 0.25   | 0.244 | 0.234  | 0.223 | 0.261 |
|               | 0.264  | 0.252 | 0.258  | 0.268 | 0.258 |
|               | 0.223  | 0.234 | 0.208  | 0.269 | 0.232 |
|               | 0.258  | 0.272 | 0.263  | 0.238 | 0.222 |
| SHC Y317      | 0.452  | 0.447 | 0.413  | 0.422 | 0.47  |
|               | 0.475  | 0.466 | 0.481  | 0.412 | 0.473 |
|               | 0.405  | 0.42  | 0.375  | 0.517 | 0.404 |
|               | 0.473  | 0.458 | 0.43   | 0.445 | 0.423 |
| c-Cbl Y774    | 0.348  | 0.316 | 0.291  | 0.304 | 0.343 |
|               | 0.363  | 0.353 | 0.358  | 0.281 | 0.36  |
|               | 0.343  | 0.328 | 0.259  | 0.363 | 0.297 |
|               | 0.3513 | 0.351 | 0.295  | 0.333 | 0.289 |
| Paxillin Y118 | 0.573  | 0.516 | 0.483  | 0.547 | 0.522 |
|               | 0.609  | 0.555 | 0.555  | 0.51  | 0.544 |
|               | 0.516  | 0.524 | 0.459  | 0.56  | 0.477 |
|               | 0.653  | 0.616 | 0.521  | 0.54  | 0.521 |
| AKT S473      | 0.381  | 0.407 | 0.396  | 0.428 | 0.619 |
|               | 0.425  | 0.445 | 0.505  | 0.358 | 0.609 |
|               | 0.363  | 0.439 | 0.319  | 0.53  | 0.49  |
|               | 0.456  | 0.484 | 0.408  | 0.463 | 0.459 |
| GSK-3a/b S21  | 0.529  | 0.535 | 0.495  | 0.697 | 0.736 |
|               | 0.592  | 0.628 | 0.718  | 0.639 | 0.767 |
|               | 0.655  | 0.728 | 0.523  | 0.694 | 0.774 |
|               | 0.706  | 0.688 | 0.564  | 0.638 | 0.657 |
| RPS6 S235/S2  | 0.131  | 0.142 | 0.125  | 0.154 | 0.212 |
|               | 0.147  | 0.157 | 0.183  | 0.142 | 0.229 |
|               | 0.128  | 0.133 | 0.1547 | 0.155 | 0.183 |
|               | 0.143  | 0.148 | 0.156  | 0.171 | 0.171 |
| RPS6 S240/S2  | 0.094  | 0.106 | 0.1    | 0.112 | 0.123 |
|               | 0.105  | 0.12  | 0.0933 | 0.088 | 0.161 |
|               | 0.112  | 0.115 | 0.077  | 0.12  | 0.102 |
|               | 0.117  | 0.117 | 0.103  | 0.141 | 0.1   |
| PKCb S660     | 0.547  | 0.527 | 0.564  | 0.5   | 0.831 |
|               | 0.572  | 0.541 | 0.609  | 0.544 | 0.803 |

|              |        |        |       |       |       |
|--------------|--------|--------|-------|-------|-------|
|              | 0.42   | 0.448  | 0.438 | 0.7   | 0.584 |
|              | 0.511  | 0.506  | 0.525 | 0.59  | 0.625 |
| PKCd S643    | 0.655  | 0.677  | 0.625 | 0.615 | 0.705 |
|              | 0.664  | 0.697  | 0.68  | 0.564 | 0.706 |
|              | 0.6577 | 0.647  | 0.57  | 0.69  | 0.635 |
|              | 0.654  | 0.658  | 0.603 | 0.643 | 0.656 |
| MARCKs S512, | 0.464  | 0.473  | 0.41  | 0.566 | 0.472 |
|              | 0.513  | 0.516  | 0.499 | 0.493 | 0.482 |
|              | 0.497  | 0.539  | 0.47  | 0.512 | 0.493 |
|              | 0.719  | 0.5093 | 0.548 | 0.469 | 0.588 |
| CAMI S81     | 0.34   | 0.323  | 0.29  | 0.313 | 0.39  |
|              | 0.399  | 0.382  | 0.381 | 0.37  | 0.385 |
|              | 0.293  | 0.318  | 0.252 | 0.399 | 0.288 |
|              | 0.462  | 0.437  | 0.35  | 0.337 | 0.353 |
| RSK3 T356/S3 | 0.49   | 0.484  | 0.436 | 0.495 | 0.584 |
|              | 0.51   | 0.506  | 0.527 | 0.452 | 0.613 |
|              | 0.502  | 0.468  | 0.389 | 0.583 | 0.517 |
|              | 0.542  | 0.52   | 0.441 | 0.526 | 0.532 |
| RAF S289/S29 | 0.153  | 0.15   | 0.138 | 0.156 | 0.155 |
|              | 0.162  | 0.163  | 0.161 | 0.138 | 0.161 |
|              | 0.148  | 0.152  | 0.131 | 0.173 | 0.146 |
|              | 0.173  | 0.167  | 0.141 | 0.166 | 0.153 |
| MEK S217/S22 | 0.175  | 0.179  | 0.253 | 0.296 | 0.511 |
|              | 0.189  | 0.168  | 0.288 | 0.283 | 0.641 |
|              | 0.138  | 0.175  | 0.225 | 0.464 | 0.44  |
|              | 0.159  | 0.188  | 0.262 | 0.333 | 0.467 |
| ERK T202/Y20 | 0.333  | 0.322  | 0.439 | 0.497 | 0.838 |
|              | 0.369  | 0.342  | 0.533 | 0.437 | 0.849 |
|              | 0.31   | 0.287  | 0.333 | 0.713 | 0.602 |
|              | 0.349  | 0.304  | 0.389 | 0.575 | 0.626 |
| p90RSK S380  | 0.35   | 0.319  | 0.493 | 0.442 | 0.882 |
|              | 0.388  | 0.329  | 0.431 | 0.508 | 0.855 |
|              | 0.3653 | 0.391  | 0.435 | 0.614 | 0.456 |
|              | 0.358  | 0.395  | 0.425 | 0.315 | 0.279 |
| STAT1 Y701   | 0.388  | 0.372  | 0.364 | 0.359 | 0.393 |
|              | 0.389  | 0.39   | 0.39  | 0.4   | 0.404 |
|              | 0.348  | 0.351  | 0.334 | 0.407 | 0.354 |
|              | 0.381  | 0.387  | 0.377 | 0.378 | 0.366 |
| STAT3 Y705   | 0.581  | 0.543  | 0.542 | 0.548 | 0.565 |

|               |         |       |       |       |       |
|---------------|---------|-------|-------|-------|-------|
|               | 0.599   | 0.571 | 0.563 | 0.591 | 0.567 |
|               | 0.514   | 0.526 | 0.511 | 0.583 | 0.513 |
|               | 0.609   | 0.577 | 0.561 | 0.555 | 0.546 |
| CREB S133     | 0.591   | 0.58  | 0.581 | 0.519 | 0.77  |
|               | 0.648   | 0.585 | 0.65  | 0.463 | 0.704 |
|               | 0.505   | 0.483 | 0.44  | 0.725 | 0.531 |
|               | 0.599   | 0.532 | 0.503 | 0.608 | 0.548 |
| NF-kB S536    | 0.693   | 0.73  | 0.669 | 0.684 | 0.932 |
|               | 0.775   | 0.763 | 0.81  | 0.755 | 0.99  |
|               | 0.615   | 0.694 | 0.54  | 0.882 | 0.741 |
|               | 0.783   | 0.79  | 0.721 | 0.806 | 0.774 |
| c-Jun S63     | 0.035   | 0.034 | 0.024 | 0.026 | 0.037 |
|               | 0.039   | 0.043 | 0.038 | 0.029 | 0.038 |
|               | 0.026   | 0.033 | 0.022 | 0.041 | 0.029 |
|               | 0.039   | 0.043 | 0.028 | 0.032 | 0.027 |
|               | SRC sh2 |       |       |       |       |
| PDGFRb Y771   | 0.335   | 0.294 | 0.322 | 0.351 | 0.298 |
|               | 0.343   | 0.299 | 0.36  | 0.315 | 0.312 |
|               | 0.311   | 0.277 | 0.352 | 0.321 | 0.331 |
|               | 0.298   | 0.273 | 0.329 | 0.32  | 0.318 |
| SHC Y317      | 0.531   | 0.53  | 0.55  | 0.616 | 0.569 |
|               | 0.544   | 0.555 | 0.596 | 0.578 | 0.585 |
|               | 0.526   | 0.537 | 0.586 | 0.564 | 0.586 |
|               | 0.526   | 0.521 | 0.552 | 0.578 | 0.564 |
| c-Cbl Y774    | 0.408   | 0.381 | 0.364 | 0.422 | 0.385 |
|               | 0.448   | 0.423 | 0.429 | 0.426 | 0.43  |
|               | 0.414   | 0.381 | 0.389 | 0.37  | 0.418 |
|               | 0.492   | 0.409 | 0.395 | 0.418 | 0.458 |
| Paxillin Y118 | 0.652   | 0.592 | 0.612 | 0.633 | 0.568 |
|               | 0.707   | 0.635 | 0.686 | 0.683 | 0.639 |
|               | 0.657   | 0.599 | 0.653 | 0.619 | 0.601 |
|               | 0.744   | 0.643 | 0.713 | 0.622 | 0.646 |
| AKT S473      | 0.422   | 0.458 | 0.451 | 0.54  | 0.48  |
|               | 0.5     | 0.493 | 0.574 | 0.591 | 0.598 |
|               | 0.397   | 0.445 | 0.492 | 0.451 | 0.64  |
|               | 0.467   | 0.5   | 0.542 | 0.565 | 0.68  |
| GSK-3a/b S21  | 0.511   | 0.558 | 0.53  | 0.661 | 0.457 |

|              |       |       |       |        |       |
|--------------|-------|-------|-------|--------|-------|
|              | 0.508 | 0.633 | 0.557 | 0.783  | 0.589 |
|              | 0.569 | 0.565 | 0.673 | 0.428  | 0.536 |
|              | 0.714 | 0.881 | 0.744 | 0.566  | 0.829 |
| RPS6 S235/S2 | 0.089 | 0.101 | 0.095 | 0.129  | 0.15  |
|              | 0.105 | 0.118 | 0.114 | 0.143  | 0.197 |
|              | 0.079 | 0.104 | 0.106 | 0.073  | 0.178 |
|              | 0.098 | 0.126 | 0.124 | 0.126  | 0.203 |
| RPS6 S240/S2 | 0.075 | 0.096 | 0.111 | 0.097  | 0.094 |
|              | 0.084 | 0.111 | 0.118 | 0.119  | 0.143 |
|              | 0.055 | 0.09  | 0.099 | 0.1113 | 0.098 |
|              | 0.081 | 0.105 | 0.114 | 0.118  | 0.132 |
| PKCb S660    | 0.623 | 0.669 | 0.64  | 0.781  | 0.918 |
|              | 0.62  | 0.638 | 0.677 | 0.676  | 0.961 |
|              | 0.595 | 0.645 | 0.71  | 0.701  | 0.981 |
|              | 0.575 | 0.552 | 0.619 | 0.745  | 0.892 |
| PKCd S643    | 0.786 | 0.777 | 0.78  | 0.788  | 0.733 |
|              | 0.76  | 0.793 | 0.79  | 0.752  | 0.72  |
|              | 0.724 | 0.752 | 0.79  | 0.76   | 0.706 |
|              | 0.743 | 0.735 | 0.745 | 0.733  | 0.689 |
| MARCKs S512, | 0.588 | 0.608 | 0.556 | 0.657  | 0.646 |
|              | 0.639 | 0.637 | 0.647 | 0.716  | 0.688 |
|              | 0.572 | 0.576 | 0.603 | 0.621  | 0.687 |
|              | 0.623 | 0.63  | 0.646 | 0.631  | 0.704 |
| CAMI S81     | 0.602 | 0.529 | 0.538 | 0.607  | 0.597 |
|              | 0.567 | 0.499 | 0.566 | 0.514  | 0.58  |
|              | 0.518 | 0.477 | 0.536 | 0.659  | 0.58  |
|              | 0.494 | 0.43  | 0.502 | 0.552  | 0.527 |
| RSK3 T356/S3 | 0.517 | 0.455 | 0.552 | 0.675  | 0.648 |
|              | 0.592 | 0.517 | 0.685 | 0.742  | 0.812 |
|              | 0.491 | 0.465 | 0.609 | 0.625  | 0.763 |
|              | 0.57  | 0.531 | 0.667 | 0.669  | 0.772 |
| RAF S289/S29 | 0.188 | 0.175 | 0.175 | 0.186  | 0.188 |
|              | 0.21  | 0.174 | 0.191 | 0.184  | 0.196 |
|              | 0.189 | 0.17  | 0.187 | 0.168  | 0.199 |
|              | 0.221 | 0.177 | 0.193 | 0.171  | 0.216 |
| MEK S217/S2  | 0.194 | 0.17  | 0.317 | 0.555  | 0.773 |
|              | 0.214 | 0.196 | 0.425 | 0.567  | 0.953 |
|              | 0.169 | 0.171 | 0.435 | 0.44   | 0.945 |
|              | 0.202 | 0.189 | 0.433 | 0.506  | 0.994 |

|              |        |       |       |        |       |
|--------------|--------|-------|-------|--------|-------|
| ERK T202/Y20 | 0.392  | 0.355 | 0.571 | 0.845  | 0.795 |
|              | 0.451  | 0.411 | 0.692 | 0.857  | 0.954 |
|              | 0.345  | 0.341 | 0.648 | 0.734  | 0.892 |
|              | 0.411  | 0.374 | 0.703 | 0.884  | 1.006 |
| p90RSK S380  | 0.255  | 0.275 | 0.35  | 0.311  | 0.69  |
|              | 0.286  | 0.295 | 0.362 | 0.36   | 0.711 |
|              | 0.417  | 0.311 | 0.282 | 0.3757 | 0.383 |
|              | 0.381  | 0.322 | 0.293 | 0.456  | 0.322 |
| STAT1 Y701   | 0.4093 | 0.407 | 0.417 | 0.465  | 0.448 |
|              | 0.412  | 0.414 | 0.434 | 0.428  | 0.446 |
|              | 0.413  | 0.406 | 0.436 | 0.455  | 0.454 |
|              | 0.403  | 0.392 | 0.437 | 0.442  | 0.437 |
| STAT3 Y705   | 0.609  | 0.617 | 0.623 | 0.679  | 0.616 |
|              | 0.616  | 0.635 | 0.662 | 0.613  | 0.645 |
|              | 0.587  | 0.621 | 0.652 | 0.604  | 0.623 |
|              | 0.588  | 0.596 | 0.602 | 0.623  | 0.606 |
| CREB S133    | 0.834  | 0.679 | 0.912 | 0.965  | 1.057 |
|              | 0.789  | 0.706 | 0.959 | 0.817  | 1.047 |
|              | 0.763  | 0.676 | 0.924 | 0.927  | 1.078 |
|              | 0.745  | 0.595 | 0.842 | 0.888  | 0.918 |
| NF-kB S536   | 0.696  | 0.729 | 0.689 | 0.839  | 0.775 |
|              | 0.77   | 0.776 | 0.763 | 0.843  | 0.849 |
|              | 0.724  | 0.753 | 0.741 | 0.742  | 0.826 |
|              | 0.818  | 0.76  | 0.764 | 0.817  | 0.929 |
| c-Jun S63    | 0.044  | 0.053 | 0.05  | 0.067  | 0.047 |
|              | 0.048  | 0.055 | 0.055 | 0.062  | 0.063 |
|              | 0.046  | 0.052 | 0.06  | 0.052  | 0.059 |
|              | 0.065  | 0.07  | 0.068 | 0.053  | 0.07  |
| PLKO.T       |        |       |       |        |       |
| PDGFRb Y771  | 0.309  | 0.303 | 0.224 | 0.298  | 0.281 |
|              | 0.286  | 0.265 | 0.316 | 0.323  | 0.303 |
|              | 0.309  | 0.24  | 0.3   | 0.225  | 0.218 |
|              | 0.3    | 0.265 | 0.317 | 0.326  | 0.224 |
| SHC Y317     | 0.419  | 0.476 | 0.479 | 0.504  | 0.473 |
|              | 0.414  | 0.469 | 0.487 | 0.52   | 0.478 |
|              | 0.413  | 0.47  | 0.477 | 0.519  | 0.454 |
|              | 0.412  | 0.456 | 0.513 | 0.542  | 0.46  |

|               |       |       |        |       |        |
|---------------|-------|-------|--------|-------|--------|
| c-Cbl Y774    | 0.4   | 0.364 | 0.38   | 0.373 | 0.39   |
|               | 0.386 | 0.398 | 0.379  | 0.39  | 0.4    |
|               | 0.379 | 0.354 | 0.37   | 0.376 | 0.366  |
|               | 0.38  | 0.391 | 0.396  | 0.405 | 0.404  |
| Paxillin Y118 | 0.734 | 0.765 | 0.769  | 0.756 | 0.708  |
|               | 0.779 | 0.813 | 0.7607 | 0.76  | 0.709  |
|               | 0.733 | 0.738 | 0.749  | 0.735 | 0.613  |
|               | 0.724 | 0.744 | 0.764  | 0.755 | 0.677  |
| AKT S473      | 0.627 | 0.561 | 0.517  | 0.618 | 0.569  |
|               | 0.555 | 0.646 | 0.622  | 0.673 | 0.614  |
|               | 0.511 | 0.521 | 0.513  | 0.632 | 0.602  |
|               | 0.509 | 0.579 | 0.605  | 0.598 | 0.559  |
| GSK-3a/b S21  | 0.481 | 0.534 | 0.488  | 0.462 | 0.468  |
|               | 0.542 | 0.446 | 0.414  | 0.472 | 0.485  |
|               | 0.497 | 0.476 | 0.454  | 0.523 | 0.506  |
|               | 0.497 | 0.45  | 0.492  | 0.446 | 0.523  |
| RPS6 S235/S2  | 0.123 | 0.097 | 0.101  | 0.157 | 0.295  |
|               | 0.116 | 0.105 | 0.108  | 0.174 | 0.295  |
|               | 0.083 | 0.083 | 0.082  | 0.117 | 0.235  |
|               | 0.093 | 0.071 | 0.078  | 0.128 | 0.236  |
| RPS6 S240/S2  | 0.089 | 0.067 | 0.083  | 0.102 | 0.155  |
|               | 0.086 | 0.082 | 0.093  | 0.125 | 0.18   |
|               | 0.066 | 0.073 | 0.091  | 0.101 | 0.129  |
|               | 0.09  | 0.082 | 0.093  | 0.114 | 0.145  |
| PKCb S660     | 0.6   | 0.606 | 0.54   | 0.819 | 0.944  |
|               | 0.591 | 0.609 | 0.54   | 0.812 | 0.928  |
|               | 0.577 | 0.588 | 0.536  | 0.797 | 0.879  |
|               | 0.571 | 0.576 | 0.544  | 0.798 | 0.986  |
| PKCd S643     | 0.64  | 0.614 | 0.57   | 0.59  | 0.612  |
|               | 0.645 | 0.624 | 0.576  | 0.603 | 0.609  |
|               | 0.641 | 0.619 | 0.58   | 0.609 | 0.604  |
|               | 0.643 | 0.604 | 0.577  | 0.608 | 0.59   |
| MARCKs S512,  | 0.735 | 0.729 | 0.686  | 0.712 | 0.659  |
|               | 0.681 | 0.751 | 0.6837 | 0.731 | 0.6227 |
|               | 0.706 | 0.693 | 0.657  | 0.692 | 0.582  |
|               | 0.7   | 0.677 | 0.708  | 0.712 | 0.627  |
| CAMI S81      | 0.618 | 0.599 | 0.576  | 0.58  | 0.562  |
|               | 0.587 | 0.662 | 0.629  | 0.604 | 0.598  |
|               | 0.544 | 0.567 | 0.547  | 0.579 | 0.515  |
|               | 0.562 | 0.593 | 0.604  | 0.536 | 0.503  |

|              |        |       |       |       |       |
|--------------|--------|-------|-------|-------|-------|
| RSK3 T356/S3 | 0.593  | 0.571 | 0.582 | 0.71  | 0.787 |
|              | 0.603  | 0.587 | 0.589 | 0.742 | 0.823 |
|              | 0.561  | 0.553 | 0.568 | 0.694 | 0.743 |
|              | 0.569  | 0.55  | 0.566 | 0.786 | 0.836 |
| RAF S289/S29 | 0.189  | 0.176 | 0.177 | 0.175 | 0.183 |
|              | 0.187  | 0.184 | 0.185 | 0.18  | 0.19  |
|              | 0.179  | 0.175 | 0.172 | 0.169 | 0.173 |
|              | 0.185  | 0.178 | 0.18  | 0.175 | 0.174 |
| MEK S217/S2  | 0.185  | 0.19  | 0.231 | 0.609 | 0.837 |
|              | 0.186  | 0.186 | 0.237 | 0.661 | 0.905 |
|              | 0.175  | 0.185 | 0.221 | 0.628 | 0.743 |
|              | 0.182  | 0.175 | 0.203 | 0.617 | 0.824 |
| ERK T202/Y20 | 0.3403 | 0.329 | 0.426 | 0.832 | 0.876 |
|              | 0.348  | 0.331 | 0.427 | 0.917 | 0.92  |
|              | 0.341  | 0.305 | 0.386 | 0.817 | 0.791 |
|              | 0.332  | 0.311 | 0.373 | 0.688 | 0.82  |
| p90RSK S380  | 0.525  | 0.227 | 0.246 | 0.239 | 0.467 |
|              | 0.512  | 0.225 | 0.25  | 0.232 | 0.44  |
|              | 0.645  | 0.229 | 0.244 | 0.209 | 0.444 |
|              | 0.561  | 0.225 | 0.223 | 0.219 | 0.441 |
| STAT1 Y701   | 0.386  | 0.362 | 0.394 | 0.377 | 0.426 |
|              | 0.384  | 0.365 | 0.397 | 0.38  | 0.432 |
|              | 0.376  | 0.363 | 0.393 | 0.365 | 0.42  |
|              | 0.373  | 0.358 | 0.392 | 0.365 | 0.414 |
| STAT3 Y705   | 0.6    | 0.59  | 0.585 | 0.605 | 0.547 |
|              | 0.59   | 0.613 | 0.592 | 0.607 | 0.585 |
|              | 0.544  | 0.577 | 0.556 | 0.571 | 0.573 |
|              | 0.545  | 0.578 | 0.559 | 0.586 | 0.557 |
| CREB S133    | 0.612  | 0.562 | 0.627 | 0.715 | 0.835 |
|              | 0.585  | 0.547 | 0.672 | 0.787 | 0.929 |
|              | 0.575  | 0.604 | 0.63  | 0.714 | 0.708 |
|              | 0.593  | 0.571 | 0.627 | 0.64  | 0.791 |
| NF-kB S536   | 0.616  | 0.58  | 0.585 | 0.638 | 0.657 |
|              | 0.589  | 0.628 | 0.596 | 0.695 | 0.699 |
|              | 0.598  | 0.595 | 0.615 | 0.662 | 0.652 |
|              | 0.601  | 0.578 | 0.583 | 0.632 | 0.664 |
| c-Jun S63    | 0.035  | 0.04  | 0.036 | 0.039 | 0.044 |
|              | 0.036  | 0.043 | 0.037 | 0.042 | 0.061 |
|              | 0.041  | 0.04  | 0.044 | 0.038 | 0.04  |

|               |          |        |        |        |        |
|---------------|----------|--------|--------|--------|--------|
|               | 0.042    | 0.046  | 0.043  | 0.043  | 0.05   |
|               | shGFP477 |        |        |        |        |
| PDGFRb Y771   | 0.3015   | 0.2965 | 0.308  | 0.3185 | 0.312  |
|               | 0.291    | 0.2895 | 0.3125 | 0.325  | 0.306  |
|               | 0.2795   | 0.3125 | 0.3135 | 0.3365 | 0.323  |
|               | 0.3065   | 0.309  | 0.3255 | 0.3225 | 0.3325 |
| SHC Y317      | 0.4455   | 0.4865 | 0.4985 | 0.496  | 0.525  |
|               | 0.432    | 0.4945 | 0.5055 | 0.513  | 0.5225 |
|               | 0.417    | 0.508  | 0.5005 | 0.5175 | 0.5295 |
|               | 0.446    | 0.5015 | 0.503  | 0.5035 | 0.533  |
| c-Cbl Y774    | 0.4135   | 0.3905 | 0.389  | 0.3895 | 0.3935 |
|               | 0.408    | 0.4035 | 0.406  | 0.4085 | 0.4065 |
|               | 0.3725   | 0.4105 | 0.3965 | 0.4025 | 0.401  |
|               | 0.416    | 0.417  | 0.406  | 0.408  | 0.4195 |
| Paxillin Y118 | 0.707    | 0.654  | 0.6295 | 0.66   | 0.6315 |
|               | 0.7145   | 0.66   | 0.63   | 0.6875 | 0.6625 |
|               | 0.6645   | 0.6965 | 0.6405 | 0.703  | 0.686  |
|               | 0.7365   | 0.714  | 0.6605 | 0.7145 | 0.7125 |
| AKT S473      | 0.59     | 0.5245 | 0.5475 | 0.5565 | 0.645  |
|               | 0.5735   | 0.5225 | 0.551  | 0.619  | 0.6065 |
|               | 0.553    | 0.54   | 0.554  | 0.5965 | 0.6075 |
|               | 0.588    | 0.56   | 0.576  | 0.627  | 0.6475 |
| GSK-3a/b S21  | 0.582    | 0.5395 | 0.5465 | 0.572  | 0.5635 |
|               | 0.5645   | 0.54   | 0.5515 | 0.581  | 0.535  |
|               | 0.5615   | 0.5445 | 0.5815 | 0.5645 | 0.6025 |
|               | 0.557    | 0.512  | 0.4965 | 0.523  | 0.591  |
| RPS6 S235/S2  | 0.1075   | 0.1064 | 0.1045 | 0.146  | 0.211  |
|               | 0.108    | 0.1025 | 0.1155 | 0.142  | 0.2155 |
|               | 0.1195   | 0.1075 | 0.117  | 0.117  | 0.1975 |
|               | 0.113    | 0.107  | 0.1285 | 0.12   | 0.1885 |
| RPS6 S240/S2  | 0.081    | 0.0835 | 0.094  | 0.1405 | 0.145  |
|               | 0.077    | 0.0895 | 0.099  | 0.135  | 0.16   |
|               | 0.1005   | 0.09   | 0.1    | 0.1075 | 0.1385 |
|               | 0.072    | 0.091  | 0.112  | 0.1145 | 0.1455 |
| PKCb S660     | 0.585    | 0.596  | 0.63   | 0.7    | 0.961  |
|               | 0.5625   | 0.5665 | 0.5975 | 0.688  | 0.8735 |
|               | 0.5245   | 0.605  | 0.642  | 0.72   | 0.942  |

|              |        |        |        |        |        |
|--------------|--------|--------|--------|--------|--------|
|              | 0.572  | 0.583  | 0.6285 | 0.6785 | 0.885  |
| PKCd S643    | 0.677  | 0.679  | 0.6865 | 0.647  | 0.645  |
|              | 0.66   | 0.679  | 0.68   | 0.6575 | 0.642  |
|              | 0.6305 | 0.668  | 0.675  | 0.6575 | 0.688  |
|              | 0.6765 | 0.6755 | 0.6815 | 0.6455 | 0.667  |
| MARCKs S512, | 0.783  | 0.7225 | 0.7805 | 0.7744 | 0.744  |
|              | 0.758  | 0.6995 | 0.761  | 0.7555 | 0.7285 |
|              | 0.7253 | 0.7435 | 0.7235 | 0.7645 | 0.7641 |
|              | 0.708  | 0.6995 | 0.7545 | 0.7485 | 0.74   |
| CAMI S81     | 0.591  | 0.5435 | 0.62   | 0.5665 | 0.629  |
|              | 0.5335 | 0.505  | 0.5455 | 0.574  | 0.5625 |
|              | 0.534  | 0.602  | 0.6275 | 0.609  | 0.538  |
|              | 0.5845 | 0.5945 | 0.625  | 0.5585 | 0.603  |
| RSK3 T356/S3 | 0.5865 | 0.5565 | 0.6245 | 0.63   | 0.7705 |
|              | 0.605  | 0.58   | 0.609  | 0.636  | 0.747  |
|              | 0.6035 | 0.5905 | 0.639  | 0.643  | 0.7805 |
|              | 0.585  | 0.5855 | 0.6135 | 0.647  | 0.777  |
| RAF S289/S29 | 0.1885 | 0.1925 | 0.183  | 0.171  | 0.191  |
|              | 0.1935 | 0.1945 | 0.1855 | 0.176  | 0.1995 |
|              | 0.1715 | 0.199  | 0.1835 | 0.1765 | 0.198  |
|              | 0.196  | 0.202  | 0.1805 | 0.1775 | 0.2025 |
| MEK S217/S2  | 0.1825 | 0.1805 | 0.262  | 0.396  | 0.7495 |
|              | 0.1855 | 0.1725 | 0.257  | 0.4945 | 0.711  |
|              | 0.1775 | 0.183  | 0.276  | 0.453  | 0.6383 |
|              | 0.1905 | 0.182  | 0.2675 | 0.472  | 0.6835 |
| ERK T202/Y20 | 0.3678 | 0.358  | 0.643  | 0.8175 | 1.024  |
|              | 0.378  | 0.354  | 0.626  | 0.86   | 0.9905 |
|              | 0.36   | 0.3785 | 0.655  | 0.8565 | 1.035  |
|              | 0.3605 | 0.363  | 0.6525 | 0.8355 | 1.0395 |
| p90RSK S380  | 0.286  | 0.2795 | 0.2585 | 0.2815 | 0.3875 |
|              | 0.45   | 0.2525 | 0.2635 | 0.2745 | 0.44   |
|              | 0.438  | 0.2465 | 0.298  | 0.3275 | 0.4935 |
|              | 0.3875 | 0.2675 | 0.336  | 0.31   | 0.4995 |
| STAT1 Y701   | 0.395  | 0.3945 | 0.4255 | 0.407  | 0.4495 |
|              | 0.388  | 0.393  | 0.415  | 0.397  | 0.4395 |
|              | 0.374  | 0.4005 | 0.408  | 0.4105 | 0.4365 |
|              | 0.3905 | 0.396  | 0.4065 | 0.403  | 0.4345 |
| STAT3 Y705   | 0.594  | 0.6105 | 0.587  | 0.615  | 0.6025 |
|              | 0.5675 | 0.6075 | 0.5755 | 0.5815 | 0.609  |

|               |         |        |        |        |        |
|---------------|---------|--------|--------|--------|--------|
|               | 0.552   | 0.6435 | 0.5815 | 0.6525 | 0.6305 |
|               | 0.5755  | 0.628  | 0.587  | 0.6195 | 0.605  |
| CREB S133     | 0.5965  | 0.5475 | 0.6435 | 0.688  | 0.86   |
|               | 0.563   | 0.5635 | 0.6425 | 0.716  | 0.8305 |
|               | 0.5035  | 0.5855 | 0.686  | 0.762  | 0.8825 |
|               | 0.553   | 0.549  | 0.646  | 0.7155 | 0.849  |
| NF-kB S536    | 0.6675  | 0.6645 | 0.6535 | 0.772  | 0.805  |
|               | 0.667   | 0.66   | 0.6595 | 0.814  | 0.821  |
|               | 0.629   | 0.658  | 0.652  | 0.795  | 0.8065 |
|               | 0.6785  | 0.6515 | 0.644  | 0.7725 | 0.797  |
| c-Jun S63     | 0.0495  | 0.0505 | 0.0495 | 0.0495 | 0.048  |
|               | 0.0485  | 0.046  | 0.0515 | 0.0465 | 0.057  |
|               | 0.044   | 0.057  | 0.051  | 0.057  | 0.058  |
|               | 0.0515  | 0.0494 | 0.053  | 0.052  | 0.055  |
|               | shGFP49 |        |        |        |        |
| PDGFRb Y771   | 0.268   | 0.272  | 0.283  | 0.293  | 0.297  |
|               | 0.2821  | 0.2875 | 0.307  | 0.2989 | 0.292  |
|               | 0.27    | 0.2785 | 0.283  | 0.281  | 0.2905 |
|               | 0.289   | 0.287  | 0.295  | 0.3025 | 0.292  |
| SHC Y317      | 0.3905  | 0.4275 | 0.409  | 0.4795 | 0.467  |
|               | 0.4099  | 0.4595 | 0.4675 | 0.4985 | 0.4695 |
|               | 0.3805  | 0.434  | 0.418  | 0.4445 | 0.455  |
|               | 0.3905  | 0.42   | 0.423  | 0.4655 | 0.4605 |
| c-Cbl Y774    | 0.375   | 0.4015 | 0.372  | 0.387  | 0.375  |
|               | 0.4031  | 0.417  | 0.4045 | 0.3625 | 0.384  |
|               | 0.375   | 0.4035 | 0.359  | 0.3575 | 0.3645 |
|               | 0.3875  | 0.3945 | 0.3705 | 0.3875 | 0.3735 |
| Paxillin Y118 | 0.6545  | 0.664  | 0.663  | 0.6965 | 0.6625 |
|               | 0.7052  | 0.691  | 0.6985 | 0.6595 | 0.6945 |
|               | 0.6665  | 0.654  | 0.6365 | 0.677  | 0.667  |
|               | 0.6715  | 0.68   | 0.6655 | 0.7135 | 0.686  |
| AKT S473      | 0.55    | 0.618  | 0.5835 | 0.7165 | 0.7325 |
|               | 0.5735  | 0.6005 | 0.667  | 0.6999 | 0.7455 |
|               | 0.538   | 0.5805 | 0.566  | 0.619  | 0.6645 |
|               | 0.5345  | 0.5905 | 0.6105 | 0.6435 | 0.755  |
| GSK-3a/b S21  | 0.4885  | 0.4995 | 0.531  | 0.575  | 0.6105 |
|               | 0.538   | 0.5145 | 0.604  | 0.5164 | 0.606  |

|              |        |        |        |        |        |
|--------------|--------|--------|--------|--------|--------|
|              | 0.4805 | 0.447  | 0.473  | 0.502  | 0.5645 |
|              | 0.485  | 0.438  | 0.511  | 0.5415 | 0.551  |
| RPS6 S235/S2 | 0.146  | 0.115  | 0.1325 | 0.2255 | 0.315  |
|              | 0.1375 | 0.1105 | 0.1525 | 0.1975 | 0.3225 |
|              | 0.144  | 0.124  | 0.142  | 0.169  | 0.272  |
|              | 0.148  | 0.122  | 0.1535 | 0.1855 | 0.291  |
| RPS6 S240/S2 | 0.133  | 0.111  | 0.1335 | 0.2135 | 0.2405 |
|              | 0.1385 | 0.105  | 0.156  | 0.2015 | 0.2305 |
|              | 0.1405 | 0.113  | 0.1425 | 0.1635 | 0.206  |
|              | 0.1295 | 0.117  | 0.165  | 0.186  | 0.2135 |
| PKCb S660    | 0.581  | 0.591  | 0.5205 | 0.763  | 0.9515 |
|              | 0.5974 | 0.587  | 0.5615 | 0.696  | 0.9765 |
|              | 0.5705 | 0.5725 | 0.506  | 0.6835 | 0.885  |
|              | 0.566  | 0.5465 | 0.5145 | 0.718  | 0.879  |
| PKCd S643    | 0.6205 | 0.6065 | 0.6005 | 0.628  | 0.6105 |
|              | 0.606  | 0.637  | 0.6485 | 0.6522 | 0.6165 |
|              | 0.6135 | 0.5905 | 0.606  | 0.6115 | 0.6115 |
|              | 0.627  | 0.583  | 0.6135 | 0.618  | 0.6135 |
| MARCKs S512, | 0.5495 | 0.6555 | 0.5495 | 0.592  | 0.5515 |
|              | 0.6219 | 0.693  | 0.651  | 0.6529 | 0.567  |
|              | 0.592  | 0.664  | 0.5695 | 0.605  | 0.5785 |
|              | 0.592  | 0.6325 | 0.589  | 0.6375 | 0.5985 |
| CAMI S81     | 0.5505 | 0.5595 | 0.557  | 0.5985 | 0.6005 |
|              | 0.6019 | 0.563  | 0.608  | 0.5433 | 0.6095 |
|              | 0.5955 | 0.603  | 0.5815 | 0.5565 | 0.568  |
|              | 0.619  | 0.6075 | 0.599  | 0.592  | 0.5825 |
| RSK3 T356/S3 | 0.582  | 0.5845 | 0.584  | 0.6685 | 0.7225 |
|              | 0.6105 | 0.5935 | 0.6095 | 0.6385 | 0.7475 |
|              | 0.5905 | 0.5775 | 0.575  | 0.6465 | 0.7175 |
|              | 0.593  | 0.581  | 0.5835 | 0.674  | 0.7445 |
| RAF S289/S29 | 0.1595 | 0.1715 | 0.158  | 0.174  | 0.1745 |
|              | 0.1729 | 0.188  | 0.171  | 0.1615 | 0.1815 |
|              | 0.162  | 0.1705 | 0.153  | 0.1685 | 0.1695 |
|              | 0.1645 | 0.181  | 0.166  | 0.168  | 0.1725 |
| MEK S217/S21 | 0.17   | 0.173  | 0.2195 | 0.545  | 0.802  |
|              | 0.1825 | 0.1825 | 0.261  | 0.4845 | 0.8625 |
|              | 0.1735 | 0.1745 | 0.214  | 0.491  | 0.75   |
|              | 0.1815 | 0.1645 | 0.2115 | 0.515  | 0.776  |
| ERK T202/Y20 | 0.3885 | 0.324  | 0.4025 | 0.671  | 0.9175 |

|             |        |        |        |        |        |
|-------------|--------|--------|--------|--------|--------|
|             | 0.3275 | 0.3395 | 0.463  | 0.5915 | 0.982  |
|             | 0.3545 | 0.304  | 0.395  | 0.561  | 0.8615 |
|             | 0.3415 | 0.3105 | 0.391  | 0.619  | 0.9015 |
| p90RSK S380 | 0.567  | 0.2555 | 0.2605 | 0.222  | 0.4205 |
|             | 0.5315 | 0.21   | 0.2415 | 0.291  | 0.4185 |
|             | 0.583  | 0.237  | 0.2555 | 0.2275 | 0.414  |
|             | 0.57   | 0.2525 | 0.239  | 0.2445 | 0.413  |
| STAT1 Y701  | 0.346  | 0.3745 | 0.377  | 0.4105 | 0.3595 |
|             | 0.3345 | 0.397  | 0.3995 | 0.391  | 0.376  |
|             | 0.348  | 0.381  | 0.3745 | 0.3905 | 0.392  |
|             | 0.35   | 0.378  | 0.376  | 0.389  | 0.39   |
| STAT3 Y705  | 0.57   | 0.58   | 0.574  | 0.562  | 0.5655 |
|             | 0.554  | 0.587  | 0.6125 | 0.564  | 0.5725 |
|             | 0.56   | 0.567  | 0.579  | 0.5595 | 0.577  |
|             | 0.585  | 0.5735 | 0.589  | 0.5625 | 0.581  |
| CREB S133   | 0.5115 | 0.5215 | 0.5375 | 0.638  | 0.766  |
|             | 0.4525 | 0.561  | 0.622  | 0.579  | 0.8095 |
|             | 0.492  | 0.5205 | 0.5315 | 0.5895 | 0.7345 |
|             | 0.495  | 0.4475 | 0.54   | 0.625  | 0.775  |
| NF-kB S536  | 0.569  | 0.63   | 0.591  | 0.6925 | 0.7245 |
|             | 0.5967 | 0.63   | 0.6635 | 0.636  | 0.735  |
|             | 0.568  | 0.6075 | 0.5795 | 0.6345 | 0.683  |
|             | 0.564  | 0.595  | 0.5825 | 0.642  | 0.674  |
| c-Jun S63   | 0.0405 | 0.0475 | 0.04   | 0.0475 | 0.0505 |
|             | 0.0475 | 0.047  | 0.0461 | 0.0445 | 0.0565 |
|             | 0.0425 | 0.0465 | 0.041  | 0.04   | 0.042  |
|             | 0.0455 | 0.047  | 0.0455 | 0.046  | 0.047  |

| 16     | 32    | 64     | 96     | 128   | 256    |
|--------|-------|--------|--------|-------|--------|
| 0.281  | 0.283 | 0.297  | 0.299  | 0.289 | 0.308  |
| 0.2793 | 0.282 | 0.302  | 0.304  | 0.29  | 0.297  |
| 0.277  | 0.276 | 0.297  | 0.309  | 0.267 | 0.296  |
| 0.28   | 0.28  | 0.294  | 0.291  | 0.285 | 0.281  |
| 0.455  | 0.45  | 0.443  | 0.439  | 0.446 | 0.44   |
| 0.471  | 0.448 | 0.452  | 0.435  | 0.434 | 0.444  |
| 0.47   | 0.439 | 0.428  | 0.433  | 0.416 | 0.425  |
| 0.446  | 0.434 | 0.427  | 0.422  | 0.414 | 0.431  |
| 0.368  | 0.398 | 0.3923 | 0.399  | 0.389 | 0.386  |
| 0.386  | 0.388 | 0.391  | 0.396  | 0.405 | 0.402  |
| 0.377  | 0.393 | 0.393  | 0.411  | 0.4   | 0.399  |
| 0.382  | 0.399 | 0.393  | 0.409  | 0.392 | 0.4    |
| 0.623  | 0.665 | 0.709  | 0.734  | 0.646 | 0.68   |
| 0.704  | 0.665 | 0.697  | 0.734  | 0.683 | 0.714  |
| 0.643  | 0.719 | 0.748  | 0.784  | 0.684 | 0.727  |
| 0.669  | 0.699 | 0.741  | 0.781  | 0.686 | 0.714  |
| 0.309  | 0.447 | 0.37   | 0.406  | 0.346 | 0.34   |
| 0.459  | 0.457 | 0.421  | 0.424  | 0.367 | 0.3657 |
| 0.402  | 0.426 | 0.399  | 0.422  | 0.369 | 0.356  |
| 0.373  | 0.443 | 0.449  | 0.436  | 0.375 | 0.401  |
| 0.272  | 0.282 | 0.289  | 0.2553 | 0.3   | 0.313  |
| 0.341  | 0.303 | 0.327  | 0.255  | 0.3   | 0.333  |
| 0.273  | 0.295 | 0.171  | 0.273  | 0.274 | 0.249  |
| 0.188  | 0.151 | 0.281  | 0.238  | 0.286 | 0.286  |
| 0.234  | 0.485 | 0.585  | 0.602  | 0.466 | 0.567  |
| 0.305  | 0.473 | 0.61   | 0.595  | 0.497 | 0.579  |
| 0.349  | 0.443 | 0.556  | 0.6    | 0.466 | 0.568  |
| 0.262  | 0.429 | 0.57   | 0.592  | 0.501 | 0.613  |
| 0.149  | 0.259 | 0.413  | 0.554  | 0.52  | 0.541  |
| 0.174  | 0.267 | 0.465  | 0.519  | 0.562 | 0.596  |
| 0.205  | 0.217 | 0.442  | 0.612  | 0.556 | 0.64   |
| 0.178  | 0.264 | 0.457  | 0.626  | 0.592 | 0.644  |
| 0.924  | 0.821 | 0.683  | 0.689  | 0.648 | 0.749  |
| 0.937  | 0.783 | 0.686  | 0.68   | 0.647 | 0.768  |
| 0.908  | 0.751 | 0.662  | 0.68   | 0.622 | 0.717  |
| 0.87   | 0.826 | 0.679  | 0.674  | 0.627 | 0.711  |
| 0.622  | 0.626 | 0.631  | 0.64   | 0.641 | 0.644  |

|        |       |       |        |       |       |
|--------|-------|-------|--------|-------|-------|
| 0.601  | 0.63  | 0.648 | 0.642  | 0.634 | 0.643 |
| 0.619  | 0.614 | 0.616 | 0.62   | 0.598 | 0.608 |
| 0.61   | 0.625 | 0.62  | 0.603  | 0.59  | 0.604 |
| 0.465  | 0.605 | 0.629 | 0.729  | 0.583 | 0.681 |
| 0.505  | 0.605 | 0.674 | 0.696  | 0.563 | 0.699 |
| 0.494  | 0.549 | 0.593 | 0.699  | 0.545 | 0.658 |
| 0.486  | 0.602 | 0.649 | 0.69   | 0.566 | 0.646 |
| 0.627  | 0.684 | 0.695 | 0.707  | 0.712 | 0.739 |
| 0.59   | 0.654 | 0.72  | 0.692  | 0.71  | 0.759 |
| 0.669  | 0.603 | 0.669 | 0.656  | 0.597 | 0.667 |
| 0.614  | 0.606 | 0.642 | 0.677  | 0.615 | 0.638 |
| 0.639  | 0.699 | 0.716 | 0.718  | 0.679 | 0.75  |
| 0.608  | 0.706 | 0.714 | 0.71   | 0.687 | 0.752 |
| 0.673  | 0.726 | 0.76  | 0.785  | 0.729 | 0.767 |
| 0.679  | 0.731 | 0.75  | 0.765  | 0.735 | 0.752 |
| 0.178  | 0.199 | 0.214 | 0.229  | 0.215 | 0.23  |
| 0.182  | 0.205 | 0.229 | 0.235  | 0.229 | 0.229 |
| 0.18   | 0.205 | 0.224 | 0.2333 | 0.224 | 0.229 |
| 0.187  | 0.212 | 0.226 | 0.236  | 0.221 | 0.22  |
| 0.576  | 0.323 | 0.235 | 0.228  | 0.231 | 0.306 |
| 0.792  | 0.284 | 0.238 | 0.223  | 0.244 | 0.346 |
| 0.584  | 0.355 | 0.257 | 0.257  | 0.253 | 0.318 |
| 0.5    | 0.338 | 0.25  | 0.27   | 0.267 | 0.331 |
| 0.785  | 0.632 | 0.468 | 0.52   | 0.542 | 0.646 |
| 0.881  | 0.57  | 0.528 | 0.533  | 0.565 | 0.662 |
| 0.844  | 0.663 | 0.518 | 0.531  | 0.531 | 0.626 |
| 0.905  | 0.635 | 0.517 | 0.548  | 0.577 | 0.636 |
| 0.4037 | 0.257 | 0.313 | 0.29   | 0.289 | 0.27  |
| 0.505  | 0.439 | 0.324 | 0.291  | 0.293 | 0.279 |
| 0.344  | 0.245 | 0.299 | 0.245  | 0.282 | 0.258 |
| 0.362  | 0.437 | 0.338 | 0.252  | 0.272 | 0.289 |
| 0.401  | 0.455 | 0.453 | 0.44   | 0.427 | 0.475 |
| 0.424  | 0.451 | 0.455 | 0.434  | 0.425 | 0.478 |
| 0.414  | 0.434 | 0.44  | 0.456  | 0.41  | 0.491 |
| 0.404  | 0.437 | 0.435 | 0.452  | 0.447 | 0.49  |
| 0.549  | 0.554 | 0.567 | 0.552  | 0.592 | 0.587 |
| 0.531  | 0.6   | 0.555 | 0.562  | 0.575 | 0.569 |
| 0.59   | 0.538 | 0.535 | 0.545  | 0.521 | 0.523 |
| 0.546  | 0.531 | 0.53  | 0.495  | 0.52  | 0.523 |

|       |        |        |        |        |       |
|-------|--------|--------|--------|--------|-------|
| 0.808 | 0.87   | 0.792  | 0.724  | 0.718  | 0.748 |
| 0.74  | 0.889  | 0.802  | 0.699  | 0.714  | 0.798 |
| 0.828 | 0.797  | 0.713  | 0.704  | 0.716  | 0.698 |
| 0.73  | 0.811  | 0.749  | 0.723  | 0.716  | 0.693 |
| 0.605 | 0.625  | 0.56   | 0.598  | 0.589  | 0.549 |
| 0.619 | 0.618  | 0.588  | 0.591  | 0.604  | 0.616 |
| 0.611 | 0.641  | 0.596  | 0.594  | 0.584  | 0.606 |
| 0.661 | 0.61   | 0.599  | 0.611  | 0.57   | 0.58  |
| 0.046 | 0.053  | 0.058  | 0.055  | 0.046  | 0.075 |
| 0.056 | 0.058  | 0.058  | 0.055  | 0.053  | 0.09  |
| 0.051 | 0.063  | 0.075  | 0.073  | 0.069  | 0.086 |
| 0.063 | 0.072  | 0.069  | 0.08   | 0.062  | 0.086 |
| 0.326 | 0.304  | 0.309  | 0.313  | 0.329  | 0.322 |
| 0.318 | 0.3107 | 0.306  | 0.311  | 0.296  | 0.316 |
| 0.294 | 0.306  | 0.304  | 0.31   | 0.322  | 0.299 |
| 0.303 | 0.322  | 0.305  | 0.31   | 0.302  | 0.291 |
| 0.523 | 0.465  | 0.451  | 0.448  | 0.462  | 0.453 |
| 0.524 | 0.4677 | 0.4493 | 0.4633 | 0.441  | 0.459 |
| 0.464 | 0.456  | 0.454  | 0.462  | 0.464  | 0.449 |
| 0.468 | 0.482  | 0.443  | 0.48   | 0.439  | 0.447 |
| 0.454 | 0.418  | 0.426  | 0.437  | 0.44   | 0.433 |
| 0.431 | 0.4283 | 0.4293 | 0.4393 | 0.4    | 0.445 |
| 0.416 | 0.422  | 0.444  | 0.432  | 0.424  | 0.414 |
| 0.392 | 0.445  | 0.418  | 0.449  | 0.425  | 0.421 |
| 0.807 | 0.752  | 0.735  | 0.747  | 0.797  | 0.77  |
| 0.783 | 0.611  | 0.593  | 0.76   | 0.7693 | 0.772 |
| 0.69  | 0.702  | 0.75   | 0.764  | 0.762  | 0.711 |
| 0.689 | 0.77   | 0.745  | 0.769  | 0.749  | 0.74  |
| 0.506 | 0.526  | 0.459  | 0.567  | 0.474  | 0.407 |
| 0.49  | 0.215  | 0.203  | 0.186  | 0.287  | 0.435 |
| 0.375 | 0.399  | 0.379  | 0.483  | 0.39   | 0.342 |
| 0.38  | 0.527  | 0.485  | 0.409  | 0.411  | 0.318 |
| 0.386 | 0.413  | 0.378  | 0.289  | 0.365  | 0.338 |
| 0.408 | 0.188  | 0.192  | 0.17   | 0.257  | 0.333 |
| 0.221 | 0.386  | 0.384  | 0.305  | 0.352  | 0.297 |
| 0.259 | 0.307  | 0.295  | 0.346  | 0.31   | 0.278 |

|       |        |        |        |       |       |
|-------|--------|--------|--------|-------|-------|
| 0.244 | 0.463  | 0.474  | 0.47   | 0.45  | 0.361 |
| 0.311 | 0.284  | 0.261  | 0.23   | 0.344 | 0.404 |
| 0.187 | 0.381  | 0.445  | 0.449  | 0.42  | 0.392 |
| 0.24  | 0.393  | 0.487  | 0.505  | 0.319 | 0.4   |
| 0.127 | 0.227  | 0.357  | 0.421  | 0.436 | 0.426 |
| 0.129 | 0.254  | 0.271  | 0.273  | 0.372 | 0.45  |
| 0.153 | 0.219  | 0.371  | 0.49   | 0.458 | 0.444 |
| 0.167 | 0.237  | 0.409  | 0.483  | 0.402 | 0.477 |
| 0.895 | 0.824  | 0.725  | 0.717  | 0.713 | 0.728 |
| 0.895 | 0.601  | 0.539  | 0.7053 | 0.641 | 0.742 |
| 0.92  | 0.842  | 0.696  | 0.711  | 0.726 | 0.705 |
| 0.87  | 0.865  | 0.713  | 0.688  | 0.651 | 0.69  |
| 0.709 | 0.682  | 0.674  | 0.691  | 0.689 | 0.669 |
| 0.699 | 0.6807 | 0.6707 | 0.6863 | 0.66  | 0.687 |
| 0.655 | 0.67   | 0.664  | 0.675  | 0.688 | 0.667 |
| 0.647 | 0.69   | 0.674  | 0.693  | 0.664 | 0.658 |
| 0.669 | 0.785  | 0.764  | 0.839  | 0.797 | 0.764 |
| 0.711 | 0.565  | 0.558  | 0.513  | 0.661 | 0.803 |
| 0.563 | 0.687  | 0.706  | 0.844  | 0.759 | 0.719 |
| 0.566 | 0.781  | 0.754  | 0.71   | 0.677 | 0.72  |
| 0.763 | 0.712  | 0.737  | 0.861  | 0.824 | 0.765 |
| 0.796 | 0.549  | 0.562  | 0.564  | 0.681 | 0.78  |
| 0.687 | 0.751  | 0.796  | 0.717  | 0.804 | 0.74  |
| 0.652 | 0.803  | 0.792  | 0.866  | 0.754 | 0.74  |
| 0.841 | 0.829  | 0.752  | 0.767  | 0.779 | 0.774 |
| 0.911 | 0.8307 | 0.789  | 0.8057 | 0.787 | 0.799 |
| 0.761 | 0.795  | 0.805  | 0.81   | 0.796 | 0.805 |
| 0.768 | 0.868  | 0.81   | 0.84   | 0.786 | 0.781 |
| 0.23  | 0.24   | 0.255  | 0.263  | 0.26  | 0.257 |
| 0.239 | 0.188  | 0.203  | 0.2703 | 0.26  | 0.263 |
| 0.205 | 0.239  | 0.262  | 0.271  | 0.262 | 0.254 |
| 0.201 | 0.25   | 0.263  | 0.277  | 0.258 | 0.256 |
| 0.934 | 0.402  | 0.264  | 0.253  | 0.288 | 0.321 |
| 0.987 | 0.272  | 0.189  | 0.2713 | 0.233 | 0.334 |
| 0.656 | 0.42   | 0.262  | 0.271  | 0.292 | 0.308 |
| 0.685 | 0.447  | 0.264  | 0.29   | 0.261 | 0.308 |
| 1.269 | 0.792  | 0.594  | 0.606  | 0.663 | 0.717 |
| 1.34  | 0.564  | 0.473  | 0.6353 | 0.587 | 0.712 |
| 0.997 | 0.724  | 0.599  | 0.635  | 0.672 | 0.677 |
| 1.022 | 0.831  | 0.611  | 0.665  | 0.654 | 0.681 |

|       |        |       |        |       |        |
|-------|--------|-------|--------|-------|--------|
| 0.485 | 0.422  | 0.414 | 0.291  | 0.31  | 0.307  |
| 0.473 | 0.522  | 0.329 | 0.267  | 0.319 | 0.3163 |
| 0.353 | 0.446  | 0.376 | 0.297  | 0.304 | 0.332  |
| 0.345 | 0.446  | 0.441 | 0.295  | 0.343 | 0.31   |
| 0.497 | 0.461  | 0.486 | 0.503  | 0.506 | 0.516  |
| 0.466 | 0.4617 | 0.478 | 0.409  | 0.452 | 0.517  |
| 0.443 | 0.459  | 0.474 | 0.497  | 0.475 | 0.507  |
| 0.43  | 0.465  | 0.474 | 0.496  | 0.454 | 0.493  |
| 0.611 | 0.585  | 0.612 | 0.6077 | 0.603 | 0.583  |
| 0.607 | 0.553  | 0.585 | 0.586  | 0.593 | 0.608  |
| 0.583 | 0.583  | 0.609 | 0.605  | 0.59  | 0.587  |
| 0.582 | 0.593  | 0.622 | 0.632  | 0.581 | 0.593  |
| 1.09  | 0.964  | 0.838 | 0.745  | 0.819 | 0.761  |
| 1.107 | 0.714  | 0.623 | 0.539  | 0.689 | 0.759  |
| 0.859 | 1.004  | 0.866 | 0.793  | 0.828 | 0.738  |
| 0.876 | 1.091  | 0.86  | 0.844  | 0.755 | 0.707  |
| 0.676 | 0.603  | 0.627 | 0.637  | 0.634 | 0.615  |
| 0.673 | 0.6077 | 0.625 | 0.635  | 0.602 | 0.638  |
| 0.636 | 0.615  | 0.62  | 0.633  | 0.621 | 0.621  |
| 0.616 | 0.605  | 0.628 | 0.635  | 0.631 | 0.61   |
| 0.08  | 0.058  | 0.053 | 0.048  | 0.062 | 0.081  |
| 0.071 | 0.029  | 0.026 | 0.021  | 0.046 | 0.091  |
| 0.042 | 0.066  | 0.063 | 0.07   | 0.064 | 0.08   |
| 0.041 | 0.08   | 0.066 | 0.077  | 0.058 | 0.078  |
| 0.314 | 0.282  | 0.298 | 0.297  | 0.293 | 0.302  |
| 0.334 | 0.282  | 0.296 | 0.289  | 0.28  | 0.288  |
| 0.302 | 0.302  | 0.31  | 0.311  | 0.303 | 0.312  |
| 0.318 | 0.302  | 0.31  | 0.308  | 0.305 | 0.313  |
| 0.553 | 0.467  | 0.466 | 0.474  | 0.443 | 0.438  |
| 0.586 | 0.469  | 0.472 | 0.452  | 0.431 | 0.423  |
| 0.533 | 0.527  | 0.492 | 0.483  | 0.456 | 0.444  |
| 0.585 | 0.516  | 0.481 | 0.469  | 0.463 | 0.446  |
| 0.408 | 0.39   | 0.407 | 0.401  | 0.405 | 0.423  |
| 0.384 | 0.396  | 0.418 | 0.382  | 0.398 | 0.398  |
| 0.418 | 0.371  | 0.39  | 0.368  | 0.371 | 0.382  |
| 0.388 | 0.367  | 0.374 | 0.353  | 0.366 | 0.382  |

|        |       |       |       |       |       |
|--------|-------|-------|-------|-------|-------|
| 0.6737 | 0.684 | 0.705 | 0.688 | 0.689 | 0.693 |
| 0.673  | 0.658 | 0.709 | 0.674 | 0.68  | 0.688 |
| 0.677  | 0.654 | 0.7   | 0.648 | 0.637 | 0.644 |
| 0.671  | 0.677 | 0.665 | 0.635 | 0.647 | 0.653 |
| 0.439  | 0.416 | 0.419 | 0.451 | 0.396 | 0.36  |
| 0.278  | 0.262 | 0.395 | 0.377 | 0.3   | 0.298 |
| 0.294  | 0.374 | 0.317 | 0.3   | 0.237 | 0.259 |
| 0.307  | 0.334 | 0.237 | 0.242 | 0.236 | 0.273 |
| 0.308  | 0.368 | 0.267 | 0.347 | 0.259 | 0.303 |
| 0.252  | 0.32  | 0.295 | 0.284 | 0.32  | 0.248 |
| 0.333  | 0.245 | 0.234 | 0.233 | 0.279 | 0.215 |
| 0.247  | 0.221 | 0.326 | 0.219 | 0.29  | 0.252 |
| 0.649  | 0.885 | 1.115 | 1.232 | 0.999 | 0.892 |
| 0.55   | 0.853 | 1.083 | 1.08  | 0.893 | 0.863 |
| 0.555  | 0.949 | 0.997 | 1.004 | 0.81  | 0.8   |
| 0.582  | 0.936 | 0.917 | 0.983 | 0.855 | 0.823 |
| 0.372  | 0.585 | 1.051 | 1.298 | 1.232 | 1.134 |
| 0.356  | 0.588 | 1.065 | 1.23  | 1.049 | 1.081 |
| 0.307  | 0.725 | 1.015 | 1.142 | 0.98  | 0.912 |
| 0.369  | 0.725 | 0.96  | 1.137 | 1.016 | 0.952 |
| 0.953  | 0.647 | 0.573 | 0.578 | 0.599 | 0.664 |
| 1.028  | 0.619 | 0.592 | 0.551 | 0.556 | 0.632 |
| 0.826  | 0.82  | 0.639 | 0.619 | 0.6   | 0.72  |
| 1.048  | 0.813 | 0.635 | 0.6   | 0.623 | 0.712 |
| 0.67   | 0.65  | 0.622 | 0.674 | 0.662 | 0.633 |
| 0.698  | 0.639 | 0.62  | 0.646 | 0.639 | 0.62  |
| 0.672  | 0.674 | 0.649 | 0.682 | 0.661 | 0.653 |
| 0.687  | 0.668 | 0.629 | 0.667 | 0.669 | 0.654 |
| 0.698  | 0.739 | 0.738 | 0.772 | 0.776 | 0.776 |
| 0.621  | 0.69  | 0.718 | 0.743 | 0.722 | 0.734 |
| 0.645  | 0.692 | 0.675 | 0.681 | 0.669 | 0.717 |
| 0.609  | 0.701 | 0.66  | 0.682 | 0.679 | 0.68  |
| 0.513  | 0.567 | 0.607 | 0.557 | 0.527 | 0.529 |
| 0.495  | 0.552 | 0.604 | 0.584 | 0.567 | 0.464 |
| 0.584  | 0.506 | 0.479 | 0.535 | 0.497 | 0.518 |
| 0.518  | 0.469 | 0.589 | 0.493 | 0.495 | 0.469 |
| 0.704  | 0.703 | 0.68  | 0.652 | 0.685 | 0.723 |
| 0.654  | 0.704 | 0.695 | 0.616 | 0.647 | 0.68  |
| 0.662  | 0.667 | 0.649 | 0.599 | 0.618 | 0.656 |

|        |        |       |       |       |        |
|--------|--------|-------|-------|-------|--------|
| 0.638  | 0.703  | 0.653 | 0.587 | 0.627 | 0.666  |
| 0.264  | 0.256  | 0.277 | 0.31  | 0.321 | 0.31   |
| 0.235  | 0.256  | 0.288 | 0.277 | 0.277 | 0.281  |
| 0.254  | 0.255  | 0.27  | 0.272 | 0.262 | 0.242  |
| 0.25   | 0.261  | 0.258 | 0.247 | 0.265 | 0.249  |
| 0.702  | 0.356  | 0.261 | 0.273 | 0.254 | 0.289  |
| 0.689  | 0.297  | 0.262 | 0.249 | 0.234 | 0.272  |
| 0.507  | 0.379  | 0.239 | 0.231 | 0.21  | 0.258  |
| 0.689  | 0.36   | 0.23  | 0.225 | 0.219 | 0.258  |
| 0.854  | 0.661  | 0.543 | 0.58  | 0.549 | 0.586  |
| 0.953  | 0.594  | 0.546 | 0.53  | 0.529 | 0.567  |
| 0.755  | 0.64   | 0.488 | 0.473 | 0.464 | 0.533  |
| 0.804  | 0.632  | 0.492 | 0.454 | 0.465 | 0.529  |
| 0.612  | 0.35   | 0.372 | 0.282 | 0.3   | 0.322  |
| 0.529  | 0.409  | 0.345 | 0.31  | 0.332 | 0.302  |
| 0.319  | 0.379  | 0.462 | 0.283 | 0.278 | 0.268  |
| 0.384  | 0.605  | 0.418 | 0.276 | 0.268 | 0.269  |
| 0.484  | 0.445  | 0.443 | 0.471 | 0.511 | 0.473  |
| 0.503  | 0.446  | 0.461 | 0.452 | 0.473 | 0.429  |
| 0.455  | 0.499  | 0.479 | 0.492 | 0.509 | 0.47   |
| 0.501  | 0.509  | 0.469 | 0.496 | 0.513 | 0.475  |
| 0.579  | 0.574  | 0.555 | 0.571 | 0.55  | 0.56   |
| 0.598  | 0.567  | 0.551 | 0.562 | 0.531 | 0.563  |
| 0.565  | 0.602  | 0.578 | 0.603 | 0.579 | 0.594  |
| 0.616  | 0.596  | 0.579 | 0.593 | 0.576 | 0.595  |
| 0.921  | 0.833  | 0.728 | 0.668 | 0.656 | 0.645  |
| 0.903  | 0.766  | 0.761 | 0.645 | 0.646 | 0.639  |
| 0.768  | 0.959  | 0.743 | 0.736 | 0.672 | 0.6547 |
| 0.967  | 0.965  | 0.761 | 0.687 | 0.688 | 0.68   |
| 0.702  | 0.67   | 0.651 | 0.679 | 0.63  | 0.666  |
| 0.679  | 0.654  | 0.666 | 0.665 | 0.619 | 0.654  |
| 0.674  | 0.663  | 0.62  | 0.631 | 0.601 | 0.633  |
| 0.708  | 0.652  | 0.634 | 0.634 | 0.614 | 0.639  |
| 0.108  | 0.088  | 0.107 | 0.119 | 0.107 | 0.105  |
| 0.101  | 0.0913 | 0.116 | 0.079 | 0.07  | 0.089  |
| 0.0997 | 0.095  | 0.069 | 0.071 | 0.066 | 0.075  |
| 0.09   | 0.091  | 0.063 | 0.06  | 0.065 | 0.086  |

|        |       |       |       |        |       |
|--------|-------|-------|-------|--------|-------|
| 0.325  | 0.267 | 0.299 | 0.336 | 0.313  | 0.322 |
| 0.32   | 0.264 | 0.304 | 0.32  | 0.306  | 0.315 |
| 0.27   | 0.306 | 0.309 | 0.327 | 0.31   | 0.331 |
| 0.306  | 0.301 | 0.293 | 0.318 | 0.295  | 0.321 |
| 0.57   | 0.493 | 0.498 | 0.558 | 0.535  | 0.531 |
| 0.542  | 0.472 | 0.49  | 0.502 | 0.475  | 0.49  |
| 0.534  | 0.547 | 0.516 | 0.527 | 0.512  | 0.495 |
| 0.583  | 0.553 | 0.486 | 0.505 | 0.482  | 0.484 |
| 0.42   | 0.34  | 0.406 | 0.427 | 0.407  | 0.412 |
| 0.394  | 0.341 | 0.403 | 0.407 | 0.372  | 0.384 |
| 0.345  | 0.379 | 0.411 | 0.409 | 0.377  | 0.393 |
| 0.385  | 0.361 | 0.374 | 0.382 | 0.378  | 0.371 |
| 0.709  | 0.593 | 0.666 | 0.684 | 0.668  | 0.683 |
| 0.682  | 0.534 | 0.672 | 0.647 | 0.659  | 0.642 |
| 0.607  | 0.647 | 0.672 | 0.655 | 0.647  | 0.659 |
| 0.66   | 0.599 | 0.614 | 0.606 | 0.662  | 0.659 |
| 0.2883 | 0.311 | 0.35  | 0.428 | 0.36   | 0.35  |
| 0.282  | 0.335 | 0.349 | 0.352 | 0.28   | 0.289 |
| 0.319  | 0.387 | 0.313 | 0.309 | 0.255  | 0.314 |
| 0.264  | 0.264 | 0.324 | 0.229 | 0.21   | 0.248 |
| 0.302  | 0.303 | 0.284 | 0.33  | 0.228  | 0.232 |
| 0.337  | 0.238 | 0.278 | 0.281 | 0.289  | 0.347 |
| 0.222  | 0.359 | 0.332 | 0.255 | 0.314  | 0.334 |
| 0.346  | 0.33  | 0.317 | 0.32  | 0.295  | 0.299 |
| 0.685  | 0.795 | 1.017 | 1.071 | 0.884  | 0.883 |
| 0.561  | 0.633 | 1.015 | 1.013 | 0.742  | 0.898 |
| 0.499  | 0.829 | 0.913 | 0.982 | 0.826  | 0.907 |
| 0.598  | 0.832 | 0.92  | 0.963 | 0.798  | 0.791 |
| 0.444  | 0.608 | 0.954 | 1.092 | 1.057  | 1.086 |
| 0.361  | 0.546 | 0.996 | 1.1   | 0.834  | 1.021 |
| 0.334  | 0.567 | 0.775 | 0.89  | 0.828  | 0.857 |
| 0.361  | 0.547 | 0.687 | 0.804 | 0.739  | 0.781 |
| 1.009  | 0.714 | 0.685 | 0.727 | 0.735  | 0.692 |
| 1.005  | 0.611 | 0.665 | 0.679 | 0.612  | 0.668 |
| 0.813  | 0.777 | 0.702 | 0.709 | 0.727  | 0.737 |
| 0.959  | 0.776 | 0.614 | 0.67  | 0.729  | 0.759 |
| 0.751  | 0.654 | 0.721 | 0.758 | 0.709  | 0.724 |
| 0.738  | 0.645 | 0.722 | 0.711 | 0.6983 | 0.705 |

|       |        |       |        |        |       |
|-------|--------|-------|--------|--------|-------|
| 0.703 | 0.6633 | 0.725 | 0.734  | 0.698  | 0.729 |
| 0.74  | 0.691  | 0.701 | 0.723  | 0.688  | 0.708 |
| 0.688 | 0.613  | 0.72  | 0.7093 | 0.801  | 0.788 |
| 0.601 | 0.532  | 0.724 | 0.717  | 0.7227 | 0.734 |
| 0.481 | 0.702  | 0.741 | 0.732  | 0.698  | 0.728 |
| 0.589 | 0.6157 | 0.626 | 0.679  | 0.669  | 0.734 |
| 0.776 | 0.7187 | 0.716 | 0.796  | 0.679  | 0.681 |
| 0.652 | 0.723  | 0.684 | 0.63   | 0.627  | 0.704 |
| 0.689 | 0.731  | 0.7   | 0.562  | 0.526  | 0.619 |
| 0.684 | 0.702  | 0.604 | 0.616  | 0.595  | 0.529 |
| 0.851 | 0.708  | 0.752 | 0.788  | 0.781  | 0.785 |
| 0.769 | 0.643  | 0.737 | 0.713  | 0.688  | 0.741 |
| 0.681 | 0.748  | 0.723 | 0.718  | 0.708  | 0.703 |
| 0.732 | 0.677  | 0.656 | 0.655  | 0.697  | 0.708 |
| 0.258 | 0.222  | 0.259 | 0.289  | 0.281  | 0.327 |
| 0.236 | 0.2    | 0.261 | 0.264  | 0.246  | 0.278 |
| 0.204 | 0.267  | 0.26  | 0.282  | 0.271  | 0.292 |
| 0.239 | 0.232  | 0.227 | 0.257  | 0.247  | 0.272 |
| 0.599 | 0.274  | 0.25  | 0.277  | 0.281  | 0.314 |
| 0.552 | 0.222  | 0.241 | 0.224  | 0.208  | 0.274 |
| 0.408 | 0.322  | 0.241 | 0.229  | 0.241  | 0.293 |
| 0.445 | 0.288  | 0.201 | 0.203  | 0.227  | 0.295 |
| 1.145 | 0.697  | 0.641 | 0.728  | 0.729  | 0.794 |
| 0.937 | 0.613  | 0.62  | 0.657  | 0.596  | 0.725 |
| 0.944 | 0.761  | 0.62  | 0.624  | 0.619  | 0.713 |
| 0.949 | 0.669  | 0.541 | 0.565  | 0.585  | 0.696 |
| 0.713 | 0.248  | 0.41  | 0.361  | 0.447  | 0.401 |
| 0.538 | 0.517  | 0.35  | 0.395  | 0.458  | 0.411 |
| 0.244 | 0.572  | 0.631 | 0.592  | 0.436  | 0.329 |
| 0.565 | 0.691  | 0.683 | 0.476  | 0.367  | 0.313 |
| 0.519 | 0.476  | 0.528 | 0.5077 | 0.553  | 0.597 |
| 0.485 | 0.468  | 0.53  | 0.558  | 0.475  | 0.537 |
| 0.477 | 0.488  | 0.477 | 0.492  | 0.465  | 0.538 |
| 0.499 | 0.474  | 0.435 | 0.473  | 0.446  | 0.508 |
| 0.558 | 0.579  | 0.565 | 0.567  | 0.571  | 0.613 |
| 0.586 | 0.558  | 0.584 | 0.54   | 0.534  | 0.595 |
| 0.615 | 0.59   | 0.596 | 0.571  | 0.589  | 0.623 |
| 0.558 | 0.581  | 0.577 | 0.571  | 0.586  | 0.607 |
| 0.984 | 0.743  | 0.732 | 0.764  | 0.82   | 0.74  |

|        |       |       |       |       |       |
|--------|-------|-------|-------|-------|-------|
| 0.965  | 0.674 | 0.754 | 0.7   | 0.642 | 0.749 |
| 0.705  | 0.946 | 0.786 | 0.774 | 0.825 | 0.856 |
| 0.904  | 0.929 | 0.728 | 0.719 | 0.762 | 0.813 |
| 0.706  | 0.641 | 0.648 | 0.657 | 0.673 | 0.66  |
| 0.672  | 0.625 | 0.659 | 0.65  | 0.644 | 0.659 |
| 0.62   | 0.672 | 0.662 | 0.649 | 0.632 | 0.639 |
| 0.675  | 0.663 | 0.649 | 0.645 | 0.67  | 0.649 |
| 0.0393 | 0.042 | 0.065 | 0.09  | 0.075 | 0.09  |
| 0.042  | 0.039 | 0.059 | 0.055 | 0.039 | 0.06  |
| 0.037  | 0.051 | 0.047 | 0.055 | 0.043 | 0.057 |
| 0.039  | 0.039 | 0.03  | 0.036 | 0.037 | 0.059 |
| 0.315  | 0.259 | 0.274 | 0.327 | 0.29  | 0.329 |
| 0.312  | 0.262 | 0.311 | 0.299 | 0.288 | 0.306 |
| 0.32   | 0.281 | 0.271 | 0.286 | 0.269 | 0.3   |
| 0.307  | 0.28  | 0.263 | 0.28  | 0.262 | 0.306 |
| 0.481  | 0.414 | 0.474 | 0.473 | 0.448 | 0.449 |
| 0.503  | 0.436 | 0.524 | 0.461 | 0.462 | 0.427 |
| 0.501  | 0.453 | 0.462 | 0.43  | 0.442 | 0.427 |
| 0.489  | 0.447 | 0.466 | 0.419 | 0.419 | 0.422 |
| 0.358  | 0.34  | 0.371 | 0.387 | 0.371 | 0.368 |
| 0.378  | 0.336 | 0.39  | 0.382 | 0.371 | 0.352 |
| 0.364  | 0.4   | 0.405 | 0.385 | 0.387 | 0.385 |
| 0.395  | 0.398 | 0.396 | 0.392 | 0.369 | 0.379 |
| 0.681  | 0.588 | 0.631 | 0.666 | 0.632 | 0.671 |
| 0.695  | 0.606 | 0.681 | 0.658 | 0.653 | 0.672 |
| 0.655  | 0.706 | 0.689 | 0.693 | 0.683 | 0.71  |
| 0.707  | 0.709 | 0.681 | 0.675 | 0.654 | 0.702 |
| 0.283  | 0.242 | 0.267 | 0.41  | 0.315 | 0.306 |
| 0.33   | 0.159 | 0.349 | 0.301 | 0.305 | 0.257 |
| 0.228  | 0.384 | 0.373 | 0.339 | 0.265 | 0.352 |
| 0.375  | 0.348 | 0.299 | 0.303 | 0.295 | 0.327 |
| 0.292  | 0.266 | 0.29  | 0.285 | 0.232 | 0.238 |
| 0.262  | 0.24  | 0.26  | 0.229 | 0.232 | 0.205 |
| 0.277  | 0.284 | 0.29  | 0.272 | 0.237 | 0.3   |
| 0.297  | 0.274 | 0.241 | 0.269 | 0.292 | 0.292 |
| 0.459  | 0.614 | 0.8   | 0.964 | 0.846 | 0.807 |

|       |       |       |       |        |       |
|-------|-------|-------|-------|--------|-------|
| 0.52  | 0.725 | 0.886 | 0.803 | 0.816  | 0.744 |
| 0.451 | 0.826 | 0.965 | 0.92  | 0.776  | 0.826 |
| 0.535 | 0.797 | 0.875 | 0.804 | 0.8127 | 0.811 |
| 0.242 | 0.46  | 0.75  | 0.989 | 1.018  | 1.074 |
| 0.221 | 0.57  | 0.864 | 0.969 | 1.004  | 1.022 |
| 0.27  | 0.547 | 0.837 | 0.932 | 0.945  | 0.97  |
| 0.243 | 0.545 | 0.821 | 0.899 | 0.863  | 0.963 |
| 0.963 | 0.644 | 0.656 | 0.678 | 0.693  | 0.696 |
| 1.036 | 0.633 | 0.688 | 0.704 | 0.688  | 0.661 |
| 0.876 | 0.79  | 0.667 | 0.677 | 0.67   | 0.692 |
| 1.021 | 0.819 | 0.661 | 0.653 | 0.6837 | 0.675 |
| 0.68  | 0.591 | 0.617 | 0.661 | 0.599  | 0.671 |
| 0.664 | 0.609 | 0.666 | 0.651 | 0.624  | 0.646 |
| 0.666 | 0.635 | 0.615 | 0.605 | 0.579  | 0.645 |
| 0.654 | 0.618 | 0.614 | 0.606 | 0.555  | 0.619 |
| 0.623 | 0.513 | 0.709 | 0.821 | 0.754  | 0.81  |
| 0.656 | 0.521 | 0.757 | 0.76  | 0.772  | 0.747 |
| 0.607 | 0.728 | 0.781 | 0.746 | 0.709  | 0.768 |
| 0.677 | 0.694 | 0.739 | 0.769 | 0.745  | 0.789 |
| 0.511 | 0.489 | 0.493 | 0.555 | 0.53   | 0.57  |
| 0.476 | 0.509 | 0.553 | 0.514 | 0.485  | 0.543 |
| 0.53  | 0.489 | 0.491 | 0.444 | 0.443  | 0.489 |
| 0.484 | 0.464 | 0.48  | 0.464 | 0.482  | 0.504 |
| 0.668 | 0.568 | 0.653 | 0.724 | 0.673  | 0.779 |
| 0.712 | 0.58  | 0.71  | 0.691 | 0.673  | 0.754 |
| 0.678 | 0.759 | 0.737 | 0.687 | 0.661  | 0.836 |
| 0.775 | 0.767 | 0.701 | 0.747 | 0.626  | 0.808 |
| 0.21  | 0.196 | 0.251 | 0.283 | 0.265  | 0.301 |
| 0.216 | 0.21  | 0.279 | 0.272 | 0.271  | 0.282 |
| 0.219 | 0.259 | 0.269 | 0.271 | 0.261  | 0.289 |
| 0.236 | 0.257 | 0.271 | 0.276 | 0.251  | 0.294 |
| 0.515 | 0.252 | 0.23  | 0.266 | 0.257  | 0.314 |
| 0.726 | 0.255 | 0.26  | 0.241 | 0.258  | 0.296 |
| 0.493 | 0.361 | 0.266 | 0.236 | 0.253  | 0.328 |
| 0.738 | 0.34  | 0.265 | 0.245 | 0.232  | 0.326 |
| 0.762 | 0.525 | 0.554 | 0.633 | 0.543  | 0.638 |
| 0.898 | 0.523 | 0.602 | 0.586 | 0.571  | 0.618 |
| 0.728 | 0.788 | 0.637 | 0.57  | 0.539  | 0.665 |
| 0.962 | 0.733 | 0.614 | 0.571 | 0.501  | 0.676 |

|       |        |       |        |        |       |
|-------|--------|-------|--------|--------|-------|
| 0.623 | 0.373  | 0.274 | 0.254  | 0.346  | 0.292 |
| 0.653 | 0.565  | 0.251 | 0.317  | 0.313  | 0.285 |
| 0.308 | 0.324  | 0.48  | 0.345  | 0.333  | 0.296 |
| 0.363 | 0.655  | 0.484 | 0.33   | 0.336  | 0.264 |
| 0.442 | 0.4415 | 0.445 | 0.508  | 0.48   | 0.481 |
| 0.468 | 0.4415 | 0.506 | 0.489  | 0.449  | 0.431 |
| 0.44  | 0.443  | 0.461 | 0.445  | 0.434  | 0.432 |
| 0.463 | 0.44   | 0.45  | 0.441  | 0.396  | 0.435 |
| 0.548 | 0.541  | 0.517 | 0.557  | 0.531  | 0.57  |
| 0.55  | 0.547  | 0.543 | 0.555  | 0.549  | 0.562 |
| 0.549 | 0.535  | 0.512 | 0.533  | 0.537  | 0.565 |
| 0.553 | 0.543  | 0.518 | 0.522  | 0.524  | 0.565 |
| 0.914 | 0.631  | 0.645 | 0.775  | 0.718  | 0.797 |
| 0.921 | 0.678  | 0.771 | 0.724  | 0.793  | 0.824 |
| 0.829 | 0.886  | 0.71  | 0.64   | 0.68   | 0.745 |
| 0.913 | 0.908  | 0.753 | 0.661  | 0.643  | 0.789 |
| 0.601 | 0.55   | 0.609 | 0.577  | 0.541  | 0.565 |
| 0.622 | 0.595  | 0.619 | 0.566  | 0.555  | 0.561 |
| 0.601 | 0.637  | 0.647 | 0.582  | 0.581  | 0.618 |
| 0.647 | 0.631  | 0.645 | 0.585  | 0.545  | 0.588 |
| 0.046 | 0.034  | 0.049 | 0.078  | 0.053  | 0.089 |
| 0.071 | 0.039  | 0.074 | 0.062  | 0.057  | 0.074 |
| 0.048 | 0.1    | 0.066 | 0.062  | 0.055  | 0.094 |
| 0.078 | 0.089  | 0.065 | 0.061  | 0.042  | 0.1   |
| 0.234 | 0.233  | 0.257 | 0.267  | 0.268  | 0.276 |
| 0.259 | 0.249  | 0.291 | 0.291  | 0.278  | 0.284 |
| 0.261 | 0.287  | 0.256 | 0.275  | 0.26   | 0.278 |
| 0.285 | 0.231  | 0.262 | 0.28   | 0.2687 | 0.28  |
| 0.41  | 0.364  | 0.442 | 0.401  | 0.39   | 0.411 |
| 0.479 | 0.406  | 0.465 | 0.422  | 0.443  | 0.44  |
| 0.445 | 0.483  | 0.456 | 0.431  | 0.423  | 0.454 |
| 0.539 | 0.386  | 0.466 | 0.447  | 0.362  | 0.461 |
| 0.335 | 0.315  | 0.355 | 0.3597 | 0.358  | 0.38  |
| 0.37  | 0.343  | 0.382 | 0.361  | 0.383  | 0.38  |
| 0.378 | 0.387  | 0.369 | 0.359  | 0.369  | 0.388 |
| 0.401 | 0.335  | 0.371 | 0.359  | 0.335  | 0.397 |

|       |       |       |       |        |        |
|-------|-------|-------|-------|--------|--------|
| 0.584 | 0.55  | 0.638 | 0.663 | 0.643  | 0.664  |
| 0.642 | 0.596 | 0.695 | 0.682 | 0.684  | 0.671  |
| 0.674 | 0.685 | 0.661 | 0.7   | 0.663  | 0.676  |
| 0.734 | 0.544 | 0.663 | 0.709 | 0.6633 | 0.6703 |
| 0.24  | 0.25  | 0.389 | 0.319 | 0.312  | 0.3    |
| 0.338 | 0.224 | 0.404 | 0.398 | 0.341  | 0.267  |
| 0.289 | 0.474 | 0.336 | 0.348 | 0.281  | 0.327  |
| 0.431 | 0.244 | 0.333 | 0.35  | 0.3113 | 0.325  |
| 0.172 | 0.16  | 0.266 | 0.233 | 0.309  | 0.213  |
| 0.268 | 0.246 | 0.297 | 0.261 | 0.241  | 0.224  |
| 0.218 | 0.321 | 0.236 | 0.272 | 0.242  | 0.277  |
| 0.35  | 0.196 | 0.253 | 0.262 | 0.16   | 0.278  |
| 0.399 | 0.52  | 0.91  | 0.861 | 0.821  | 0.826  |
| 0.564 | 0.627 | 0.945 | 0.925 | 0.794  | 0.825  |
| 0.503 | 0.805 | 0.902 | 0.956 | 0.828  | 0.789  |
| 0.671 | 0.536 | 0.88  | 0.913 | 0.8143 | 0.784  |
| 0.261 | 0.397 | 0.723 | 0.782 | 0.832  | 0.858  |
| 0.288 | 0.498 | 0.781 | 0.811 | 0.818  | 0.887  |
| 0.285 | 0.572 | 0.74  | 0.838 | 0.81   | 0.786  |
| 0.332 | 0.454 | 0.708 | 0.794 | 0.82   | 0.777  |
| 0.711 | 0.535 | 0.66  | 0.578 | 0.633  | 0.633  |
| 1.027 | 0.616 | 0.674 | 0.604 | 0.623  | 0.622  |
| 0.847 | 0.835 | 0.682 | 0.622 | 0.642  | 0.677  |
| 1.03  | 0.573 | 0.673 | 0.611 | 0.6327 | 0.668  |
| 0.581 | 0.576 | 0.63  | 0.583 | 0.586  | 0.592  |
| 0.627 | 0.629 | 0.641 | 0.602 | 0.608  | 0.621  |
| 0.614 | 0.674 | 0.63  | 0.593 | 0.6    | 0.63   |
| 0.639 | 0.591 | 0.628 | 0.612 | 0.555  | 0.621  |
| 0.438 | 0.412 | 0.595 | 0.597 | 0.587  | 0.637  |
| 0.589 | 0.473 | 0.638 | 0.654 | 0.689  | 0.63   |
| 0.577 | 0.593 | 0.573 | 0.61  | 0.589  | 0.655  |
| 0.633 | 0.41  | 0.575 | 0.642 | 0.6217 | 0.692  |
| 0.42  | 0.366 | 0.532 | 0.463 | 0.545  | 0.549  |
| 0.525 | 0.456 | 0.519 | 0.492 | 0.529  | 0.445  |
| 0.47  | 0.449 | 0.522 | 0.534 | 0.435  | 0.483  |
| 0.57  | 0.39  | 0.523 | 0.496 | 0.416  | 0.501  |
| 0.587 | 0.582 | 0.671 | 0.7   | 0.629  | 0.673  |
| 0.715 | 0.63  | 0.717 | 0.715 | 0.684  | 0.691  |
| 0.719 | 0.725 | 0.651 | 0.708 | 0.642  | 0.702  |
| 0.757 | 0.578 | 0.676 | 0.731 | 0.6517 | 0.739  |

|       |       |       |       |        |        |
|-------|-------|-------|-------|--------|--------|
| 0.163 | 0.166 | 0.233 | 0.215 | 0.228  | 0.23   |
| 0.198 | 0.194 | 0.258 | 0.229 | 0.2265 | 0.234  |
| 0.215 | 0.223 | 0.222 | 0.218 | 0.225  | 0.226  |
| 0.222 | 0.166 | 0.234 | 0.226 | 0.2265 | 0.244  |
| 0.325 | 0.198 | 0.232 | 0.196 | 0.212  | 0.233  |
| 0.505 | 0.236 | 0.265 | 0.218 | 0.244  | 0.253  |
| 0.416 | 0.378 | 0.228 | 0.209 | 0.217  | 0.252  |
| 0.597 | 0.218 | 0.236 | 0.219 | 0.169  | 0.268  |
| 0.545 | 0.413 | 0.497 | 0.467 | 0.457  | 0.487  |
| 0.836 | 0.477 | 0.572 | 0.524 | 0.53   | 0.51   |
| 0.769 | 0.664 | 0.503 | 0.48  | 0.46   | 0.52   |
| 0.783 | 0.428 | 0.512 | 0.486 | 0.382  | 0.542  |
| 0.375 | 0.534 | 0.246 | 0.326 | 0.315  | 0.279  |
| 0.589 | 0.585 | 0.247 | 0.346 | 0.295  | 0.324  |
| 0.414 | 0.312 | 0.492 | 0.326 | 0.34   | 0.289  |
| 0.294 | 0.796 | 0.27  | 0.319 | 0.3167 | 0.2973 |
| 0.366 | 0.339 | 0.454 | 0.409 | 0.444  | 0.409  |
| 0.41  | 0.362 | 0.498 | 0.446 | 0.464  | 0.441  |
| 0.388 | 0.425 | 0.459 | 0.426 | 0.429  | 0.428  |
| 0.446 | 0.348 | 0.474 | 0.436 | 0.4457 | 0.439  |
| 0.503 | 0.536 | 0.535 | 0.503 | 0.51   | 0.539  |
| 0.547 | 0.534 | 0.549 | 0.499 | 0.518  | 0.544  |
| 0.531 | 0.565 | 0.538 | 0.508 | 0.516  | 0.536  |
| 0.548 | 0.534 | 0.546 | 0.519 | 0.505  | 0.562  |
| 0.658 | 0.565 | 0.777 | 0.648 | 0.658  | 0.769  |
| 0.951 | 0.731 | 0.911 | 0.73  | 0.813  | 0.824  |
| 0.885 | 0.948 | 0.8   | 0.742 | 0.732  | 0.779  |
| 0.993 | 0.632 | 0.864 | 0.817 | 0.571  | 0.884  |
| 0.553 | 0.508 | 0.632 | 0.587 | 0.596  | 0.549  |
| 0.661 | 0.56  | 0.622 | 0.595 | 0.618  | 0.56   |
| 0.624 | 0.626 | 0.635 | 0.605 | 0.62   | 0.583  |
| 0.684 | 0.516 | 0.647 | 0.608 | 0.537  | 0.58   |
| 0.034 | 0.03  | 0.077 | 0.065 | 0.056  | 0.071  |
| 0.079 | 0.036 | 0.126 | 0.087 | 0.101  | 0.087  |
| 0.068 | 0.1   | 0.063 | 0.071 | 0.056  | 0.089  |
| 0.101 | 0.03  | 0.075 | 0.077 | 0.032  | 0.098  |

|       |       |        |        |        |        |
|-------|-------|--------|--------|--------|--------|
| 0.323 | 0.307 | 0.286  | 0.3    | 0.297  | 0.308  |
| 0.343 | 0.293 | 0.304  | 0.324  | 0.298  | 0.336  |
| 0.359 | 0.332 | 0.309  | 0.342  | 0.32   | 0.321  |
| 0.288 | 0.313 | 0.267  | 0.317  | 0.294  | 0.309  |
| 0.551 | 0.542 | 0.5    | 0.486  | 0.481  | 0.509  |
| 0.583 | 0.553 | 0.521  | 0.505  | 0.477  | 0.577  |
| 0.606 | 0.598 | 0.552  | 0.554  | 0.551  | 0.566  |
| 0.527 | 0.572 | 0.51   | 0.526  | 0.529  | 0.553  |
| 0.401 | 0.401 | 0.361  | 0.358  | 0.384  | 0.4653 |
| 0.413 | 0.409 | 0.389  | 0.39   | 0.403  | 0.451  |
| 0.446 | 0.434 | 0.409  | 0.416  | 0.429  | 0.457  |
| 0.41  | 0.456 | 0.405  | 0.434  | 0.449  | 0.488  |
| 0.634 | 0.621 | 0.631  | 0.631  | 0.648  | 0.67   |
| 0.637 | 0.642 | 0.594  | 0.668  | 0.613  | 0.707  |
| 0.714 | 0.712 | 0.715  | 0.729  | 0.67   | 0.698  |
| 0.643 | 0.743 | 0.61   | 0.711  | 0.665  | 0.756  |
| 0.323 | 0.31  | 0.319  | 0.243  | 0.187  | 0.212  |
| 0.252 | 0.225 | 0.283  | 0.279  | 0.284  | 0.172  |
| 0.363 | 0.431 | 0.355  | 0.308  | 0.386  | 0.38   |
| 0.242 | 0.387 | 0.283  | 0.2767 | 0.281  | 0.371  |
| 0.278 | 0.308 | 0.247  | 0.23   | 0.2    | 0.263  |
| 0.252 | 0.281 | 0.245  | 0.296  | 0.211  | 0.267  |
| 0.598 | 0.541 | 0.436  | 0.515  | 0.467  | 0.398  |
| 0.347 | 0.24  | 0.379  | 0.322  | 0.353  | 0.238  |
| 0.44  | 0.8   | 0.912  | 0.833  | 0.716  | 0.785  |
| 0.413 | 0.719 | 0.851  | 0.906  | 0.654  | 0.741  |
| 0.526 | 0.865 | 0.975  | 0.928  | 0.81   | 0.804  |
| 0.332 | 0.831 | 0.9127 | 0.857  | 0.648  | 0.798  |
| 0.169 | 0.476 | 0.763  | 0.754  | 0.736  | 0.744  |
| 0.193 | 0.433 | 0.743  | 0.8    | 0.715  | 0.767  |
| 0.197 | 0.482 | 0.803  | 0.781  | 0.759  | 0.721  |
| 0.22  | 0.454 | 0.693  | 0.785  | 0.733  | 0.801  |
| 1.048 | 0.882 | 0.725  | 0.703  | 0.695  | 0.738  |
| 1.015 | 0.868 | 0.749  | 0.734  | 0.662  | 0.738  |
| 1.134 | 0.931 | 0.772  | 0.754  | 0.73   | 0.769  |
| 0.767 | 0.83  | 0.643  | 0.716  | 0.6957 | 0.74   |
| 0.747 | 0.739 | 0.71   | 0.728  | 0.744  | 0.777  |
| 0.741 | 0.719 | 0.746  | 0.745  | 0.706  | 0.796  |
| 0.744 | 0.746 | 0.726  | 0.7353 | 0.764  | 0.768  |

|       |       |        |       |       |        |
|-------|-------|--------|-------|-------|--------|
| 0.744 | 0.719 | 0.7273 | 0.733 | 0.723 | 0.742  |
| 0.695 | 0.621 | 0.699  | 0.682 | 0.675 | 0.724  |
| 0.643 | 0.59  | 0.707  | 0.691 | 0.638 | 0.696  |
| 0.675 | 0.657 | 0.678  | 0.688 | 0.676 | 0.728  |
| 0.562 | 0.665 | 0.586  | 0.717 | 0.655 | 0.743  |
| 0.452 | 0.459 | 0.509  | 0.509 | 0.373 | 0.443  |
| 0.478 | 0.446 | 0.488  | 0.479 | 0.367 | 0.491  |
| 0.561 | 0.538 | 0.549  | 0.537 | 0.472 | 0.513  |
| 0.435 | 0.519 | 0.464  | 0.53  | 0.44  | 0.53   |
| 0.836 | 0.804 | 0.856  | 0.804 | 0.808 | 0.87   |
| 0.835 | 0.801 | 0.859  | 0.864 | 0.843 | 0.92   |
| 1.025 | 0.882 | 0.947  | 0.929 | 0.916 | 0.968  |
| 0.802 | 0.96  | 0.814  | 0.962 | 0.922 | 1.03   |
| 0.22  | 0.251 | 0.247  | 0.261 | 0.248 | 0.267  |
| 0.226 | 0.252 | 0.255  | 0.278 | 0.254 | 0.278  |
| 0.247 | 0.278 | 0.279  | 0.291 | 0.275 | 0.285  |
| 0.201 | 0.289 | 0.236  | 0.306 | 0.263 | 0.2767 |
| 0.759 | 0.398 | 0.238  | 0.248 | 0.249 | 0.324  |
| 0.736 | 0.385 | 0.259  | 0.268 | 0.252 | 0.345  |
| 0.854 | 0.427 | 0.276  | 0.287 | 0.291 | 0.347  |
| 0.661 | 0.459 | 0.249  | 0.308 | 0.274 | 0.389  |
| 1.011 | 0.822 | 0.595  | 0.59  | 0.618 | 0.684  |
| 1.007 | 0.819 | 0.619  | 0.64  | 0.607 | 0.695  |
| 1.09  | 0.704 | 0.655  | 0.629 | 0.658 | 0.731  |
| 0.988 | 0.933 | 0.628  | 0.687 | 0.638 | 0.774  |
| 0.663 | 0.675 | 0.372  | 0.322 | 0.342 | 0.32   |
| 0.629 | 0.725 | 0.383  | 0.332 | 0.388 | 0.331  |
| 0.67  | 0.517 | 0.337  | 0.347 | 0.347 | 0.392  |
| 0.632 | 0.438 | 0.396  | 0.327 | 0.341 | 0.364  |
| 0.489 | 0.472 | 0.469  | 0.48  | 0.475 | 0.471  |
| 0.48  | 0.472 | 0.511  | 0.516 | 0.466 | 0.501  |
| 0.501 | 0.517 | 0.485  | 0.484 | 0.509 | 0.479  |
| 0.426 | 0.515 | 0.44   | 0.466 | 0.499 | 0.492  |
| 0.63  | 0.615 | 0.587  | 0.623 | 0.573 | 0.645  |
| 0.674 | 0.636 | 0.615  | 0.66  | 0.566 | 0.706  |
| 0.675 | 0.657 | 0.61   | 0.668 | 0.604 | 0.694  |
| 0.583 | 0.629 | 0.576  | 0.658 | 0.571 | 0.698  |
| 1.103 | 1.192 | 0.943  | 0.889 | 0.847 | 0.955  |
| 1.163 | 1.163 | 1.045  | 0.988 | 0.829 | 0.878  |

|        |       |       |        |        |       |
|--------|-------|-------|--------|--------|-------|
| 1.265  | 1.274 | 1.055 | 1.012  | 0.94   | 0.994 |
| 0.832  | 1.214 | 0.811 | 0.952  | 0.8    | 0.984 |
| 0.769  | 0.742 | 0.698 | 0.718  | 0.744  | 0.699 |
| 0.772  | 0.76  | 0.716 | 0.742  | 0.764  | 0.733 |
| 0.83   | 0.802 | 0.771 | 0.77   | 0.808  | 0.795 |
| 0.718  | 0.809 | 0.749 | 0.804  | 0.773  | 0.77  |
| 0.064  | 0.078 | 0.056 | 0.053  | 0.063  | 0.071 |
| 0.073  | 0.072 | 0.064 | 0.063  | 0.076  | 0.083 |
| 0.084  | 0.092 | 0.076 | 0.065  | 0.084  | 0.076 |
| 0.058  | 0.089 | 0.068 | 0.08   | 0.083  | 0.09  |
| 0.263  | 0.274 | 0.277 | 0.288  | 0.297  | 0.29  |
| 0.293  | 0.257 | 0.252 | 0.246  | 0.301  | 0.294 |
| 0.249  | 0.301 | 0.298 | 0.308  | 0.316  | 0.309 |
| 0.301  | 0.311 | 0.279 | 0.287  | 0.29   | 0.288 |
| 0.481  | 0.469 | 0.431 | 0.448  | 0.419  | 0.443 |
| 0.538  | 0.467 | 0.414 | 0.415  | 0.381  | 0.44  |
| 0.425  | 0.535 | 0.47  | 0.482  | 0.44   | 0.467 |
| 0.534  | 0.539 | 0.465 | 0.473  | 0.434  | 0.453 |
| 0.398  | 0.385 | 0.377 | 0.396  | 0.426  | 0.383 |
| 0.387  | 0.384 | 0.375 | 0.372  | 0.396  | 0.376 |
| 0.372  | 0.37  | 0.36  | 0.385  | 0.405  | 0.358 |
| 0.399  | 0.38  | 0.361 | 0.375  | 0.38   | 0.34  |
| 0.69   | 0.656 | 0.716 | 0.683  | 0.6913 | 0.68  |
| 0.676  | 0.645 | 0.691 | 0.6707 | 0.682  | 0.68  |
| 0.595  | 0.64  | 0.676 | 0.663  | 0.71   | 0.642 |
| 0.68   | 0.651 | 0.686 | 0.666  | 0.682  | 0.634 |
| 0.294  | 0.316 | 0.42  | 0.407  | 0.472  | 0.409 |
| 0.297  | 0.366 | 0.307 | 0.327  | 0.281  | 0.358 |
| 0.3037 | 0.3   | 0.31  | 0.287  | 0.317  | 0.215 |
| 0.32   | 0.351 | 0.288 | 0.252  | 0.286  | 0.279 |
| 0.385  | 0.366 | 0.256 | 0.315  | 0.352  | 0.281 |
| 0.245  | 0.329 | 0.303 | 0.274  | 0.324  | 0.27  |
| 0.198  | 0.25  | 0.32  | 0.234  | 0.239  | 0.276 |
| 0.278  | 0.266 | 0.332 | 0.251  | 0.233  | 0.34  |
| 0.538  | 0.842 | 1.008 | 0.983  | 1.021  | 0.99  |
| 0.58   | 0.817 | 0.948 | 0.745  | 0.879  | 0.919 |

|       |       |       |        |       |        |
|-------|-------|-------|--------|-------|--------|
| 0.368 | 0.87  | 0.873 | 0.829  | 0.787 | 0.791  |
| 0.615 | 0.925 | 0.905 | 0.9    | 0.825 | 0.839  |
| 0.27  | 0.475 | 0.759 | 0.919  | 1.041 | 1.099  |
| 0.264 | 0.541 | 0.717 | 0.805  | 0.869 | 1.079  |
| 0.324 | 0.584 | 0.795 | 0.898  | 0.826 | 0.847  |
| 0.316 | 0.63  | 0.816 | 0.945  | 0.866 | 0.87   |
| 0.87  | 0.633 | 0.673 | 0.686  | 0.663 | 0.69   |
| 1.045 | 0.568 | 0.638 | 0.575  | 0.583 | 0.651  |
| 0.669 | 0.809 | 0.762 | 0.727  | 0.721 | 0.691  |
| 1.105 | 0.831 | 0.774 | 0.73   | 0.725 | 0.733  |
| 0.662 | 0.661 | 0.65  | 0.643  | 0.685 | 0.697  |
| 0.722 | 0.655 | 0.635 | 0.605  | 0.614 | 0.686  |
| 0.639 | 0.699 | 0.674 | 0.67   | 0.687 | 0.712  |
| 0.716 | 0.716 | 0.67  | 0.671  | 0.679 | 0.699  |
| 0.629 | 0.635 | 0.717 | 0.779  | 0.809 | 0.809  |
| 0.635 | 0.601 | 0.652 | 0.7277 | 0.647 | 0.809  |
| 0.638 | 0.662 | 0.697 | 0.699  | 0.751 | 0.752  |
| 0.65  | 0.706 | 0.695 | 0.705  | 0.726 | 0.75   |
| 0.515 | 0.542 | 0.555 | 0.484  | 0.456 | 0.472  |
| 0.456 | 0.512 | 0.494 | 0.463  | 0.486 | 0.4647 |
| 0.44  | 0.629 | 0.6   | 0.478  | 0.484 | 0.482  |
| 0.577 | 0.543 | 0.501 | 0.59   | 0.455 | 0.44   |
| 0.746 | 0.708 | 0.711 | 0.72   | 0.719 | 0.775  |
| 0.736 | 0.681 | 0.669 | 0.609  | 0.658 | 0.758  |
| 0.583 | 0.685 | 0.66  | 0.67   | 0.666 | 0.685  |
| 0.741 | 0.711 | 0.651 | 0.663  | 0.649 | 0.697  |
| 0.236 | 0.235 | 0.258 | 0.253  | 0.306 | 0.317  |
| 0.22  | 0.233 | 0.248 | 0.237  | 0.243 | 0.301  |
| 0.196 | 0.248 | 0.262 | 0.265  | 0.263 | 0.263  |
| 0.239 | 0.263 | 0.257 | 0.257  | 0.25  | 0.254  |
| 0.48  | 0.363 | 0.276 | 0.295  | 0.311 | 0.364  |
| 0.538 | 0.309 | 0.248 | 0.226  | 0.252 | 0.369  |
| 0.389 | 0.389 | 0.263 | 0.247  | 0.268 | 0.309  |
| 0.592 | 0.327 | 0.266 | 0.256  | 0.27  | 0.315  |
| 0.959 | 0.747 | 0.617 | 0.625  | 0.682 | 0.704  |
| 0.953 | 0.675 | 0.576 | 0.545  | 0.584 | 0.704  |
| 0.73  | 0.766 | 0.575 | 0.544  | 0.574 | 0.622  |
| 0.96  | 0.743 | 0.57  | 0.543  | 0.563 | 0.606  |
| 0.652 | 0.294 | 0.437 | 0.345  | 0.313 | 0.373  |

|        |       |       |        |        |        |
|--------|-------|-------|--------|--------|--------|
| 0.652  | 0.32  | 0.438 | 0.34   | 0.278  | 0.321  |
| 0.337  | 0.411 | 0.507 | 0.323  | 0.324  | 0.371  |
| 0.424  | 0.556 | 0.537 | 0.338  | 0.318  | 0.388  |
| 0.411  | 0.443 | 0.415 | 0.44   | 0.445  | 0.458  |
| 0.474  | 0.434 | 0.401 | 0.403  | 0.4513 | 0.449  |
| 0.392  | 0.494 | 0.457 | 0.46   | 0.455  | 0.4573 |
| 0.468  | 0.506 | 0.456 | 0.467  | 0.454  | 0.465  |
| 0.529  | 0.56  | 0.539 | 0.54   | 0.525  | 0.578  |
| 0.556  | 0.543 | 0.543 | 0.546  | 0.512  | 0.574  |
| 0.5    | 0.602 | 0.575 | 0.586  | 0.555  | 0.586  |
| 0.572  | 0.6   | 0.558 | 0.588  | 0.539  | 0.594  |
| 0.771  | 0.909 | 0.729 | 0.788  | 0.717  | 0.733  |
| 1.004  | 0.823 | 0.679 | 0.629  | 0.6    | 0.719  |
| 0.614  | 1.002 | 0.79  | 0.802  | 0.852  | 0.822  |
| 1.014  | 0.905 | 0.821 | 0.835  | 0.749  | 0.735  |
| 0.691  | 0.682 | 0.661 | 0.652  | 0.669  | 0.65   |
| 0.688  | 0.666 | 0.597 | 0.584  | 0.62   | 0.65   |
| 0.607  | 0.669 | 0.617 | 0.625  | 0.654  | 0.612  |
| 0.72   | 0.661 | 0.621 | 0.625  | 0.647  | 0.624  |
| 0.04   | 0.053 | 0.051 | 0.0417 | 0.072  | 0.104  |
| 0.051  | 0.044 | 0.038 | 0.038  | 0.038  | 0.101  |
| 0.029  | 0.059 | 0.048 | 0.044  | 0.055  | 0.088  |
| 0.057  | 0.052 | 0.046 | 0.043  | 0.045  | 0.077  |
| 0.305  | 0.298 | 0.278 | 0.298  | 0.31   | 0.299  |
| 0.309  | 0.24  | 0.228 | 0.235  | 0.3023 | 0.305  |
| 0.2993 | 0.308 | 0.27  | 0.302  | 0.305  | 0.307  |
| 0.284  | 0.305 | 0.264 | 0.298  | 0.292  | 0.299  |
| 0.527  | 0.569 | 0.508 | 0.518  | 0.488  | 0.43   |
| 0.512  | 0.435 | 0.4   | 0.389  | 0.417  | 0.462  |
| 0.521  | 0.531 | 0.47  | 0.485  | 0.466  | 0.438  |
| 0.524  | 0.523 | 0.465 | 0.483  | 0.446  | 0.422  |
| 0.424  | 0.4   | 0.357 | 0.378  | 0.396  | 0.416  |
| 0.403  | 0.306 | 0.303 | 0.284  | 0.327  | 0.435  |
| 0.4007 | 0.389 | 0.378 | 0.376  | 0.38   | 0.406  |
| 0.375  | 0.374 | 0.348 | 0.37   | 0.377  | 0.404  |
| 0.701  | 0.682 | 0.617 | 0.614  | 0.599  | 0.647  |

|        |        |        |        |        |        |
|--------|--------|--------|--------|--------|--------|
| 0.679  | 0.652  | 0.6343 | 0.6367 | 0.6093 | 0.698  |
| 0.6663 | 0.644  | 0.666  | 0.658  | 0.606  | 0.655  |
| 0.619  | 0.63   | 0.62   | 0.638  | 0.623  | 0.671  |
| 0.379  | 0.451  | 0.396  | 0.404  | 0.401  | 0.3    |
| 0.292  | 0.168  | 0.223  | 0.123  | 0.21   | 0.466  |
| 0.034  | 0.309  | 0.301  | 0.259  | 0.253  | 0.31   |
| 0.407  | 0.307  | 0.35   | 0.356  | 0.376  | 0.304  |
| 0.393  | 0.259  | 0.397  | 0.25   | 0.252  | 0.289  |
| 0.315  | 0.3    | 0.176  | 0.094  | 0.181  | 0.2953 |
| 0.3283 | 0.322  | 0.314  | 0.305  | 0.3    | 0.297  |
| 0.277  | 0.319  | 0.235  | 0.298  | 0.302  | 0.3    |
| 0.654  | 0.814  | 0.931  | 0.988  | 0.871  | 0.746  |
| 0.589  | 0.378  | 0.597  | 0.436  | 0.783  | 1.006  |
| 0.294  | 0.755  | 0.833  | 0.781  | 0.753  | 0.802  |
| 0.685  | 0.838  | 0.829  | 0.833  | 0.725  | 0.781  |
| 0.412  | 0.606  | 0.738  | 0.795  | 0.88   | 0.757  |
| 0.332  | 0.364  | 0.528  | 0.59   | 0.604  | 0.861  |
| 0.269  | 0.476  | 0.661  | 0.683  | 0.719  | 0.752  |
| 0.481  | 0.521  | 0.589  | 0.673  | 0.662  | 0.69   |
| 0.893  | 0.836  | 0.669  | 0.612  | 0.678  | 0.662  |
| 0.962  | 0.474  | 0.536  | 0.42   | 0.526  | 0.72   |
| 0.525  | 0.722  | 0.692  | 0.601  | 0.635  | 0.706  |
| 0.932  | 0.728  | 0.642  | 0.581  | 0.674  | 0.74   |
| 0.736  | 0.785  | 0.708  | 0.726  | 0.708  | 0.724  |
| 0.754  | 0.7427 | 0.703  | 0.7137 | 0.708  | 0.76   |
| 0.737  | 0.732  | 0.71   | 0.709  | 0.709  | 0.742  |
| 0.721  | 0.711  | 0.691  | 0.706  | 0.707  | 0.74   |
| 0.702  | 0.8    | 0.708  | 0.773  | 0.825  | 0.792  |
| 0.671  | 0.475  | 0.528  | 0.459  | 0.548  | 0.748  |
| 0.377  | 0.754  | 0.731  | 0.691  | 0.721  | 0.788  |
| 0.578  | 0.736  | 0.624  | 0.6    | 0.667  | 0.776  |
| 0.66   | 0.702  | 0.754  | 0.573  | 0.703  | 0.644  |
| 0.608  | 0.515  | 0.539  | 0.5667 | 0.463  | 0.691  |
| 0.619  | 0.625  | 0.637  | 0.584  | 0.58   | 0.592  |
| 0.589  | 0.61   | 0.599  | 0.543  | 0.539  | 0.56   |
| 0.715  | 0.724  | 0.656  | 0.696  | 0.695  | 0.661  |
| 0.686  | 0.474  | 0.495  | 0.469  | 0.507  | 0.669  |
| 0.459  | 0.65   | 0.617  | 0.656  | 0.617  | 0.639  |
| 0.611  | 0.588  | 0.535  | 0.591  | 0.591  | 0.635  |

|        |        |       |       |        |       |
|--------|--------|-------|-------|--------|-------|
| 0.243  | 0.262  | 0.229 | 0.248 | 0.258  | 0.251 |
| 0.228  | 0.178  | 0.182 | 0.155 | 0.2413 | 0.248 |
| 0.145  | 0.248  | 0.238 | 0.236 | 0.235  | 0.24  |
| 0.212  | 0.238  | 0.214 | 0.227 | 0.231  | 0.234 |
| 0.614  | 0.353  | 0.212 | 0.246 | 0.269  | 0.284 |
| 0.477  | 0.19   | 0.161 | 0.163 | 0.206  | 0.294 |
| 0.231  | 0.323  | 0.21  | 0.218 | 0.226  | 0.283 |
| 0.554  | 0.288  | 0.187 | 0.214 | 0.236  | 0.271 |
| 1.149  | 0.774  | 0.58  | 0.582 | 0.624  | 0.59  |
| 1.065  | 0.46   | 0.427 | 0.413 | 0.486  | 0.646 |
| 0.536  | 0.708  | 0.549 | 0.525 | 0.521  | 0.56  |
| 0.974  | 0.66   | 0.501 | 0.522 | 0.543  | 0.562 |
| 0.871  | 0.231  | 0.576 | 0.437 | 0.428  | 0.466 |
| 0.486  | 0.443  | 0.434 | 0.448 | 0.408  | 0.42  |
| 0.287  | 0.698  | 0.602 | 0.308 | 0.289  | 0.264 |
| 0.552  | 0.77   | 0.493 | 0.317 | 0.27   | 0.272 |
| 0.475  | 0.492  | 0.5   | 0.489 | 0.51   | 0.522 |
| 0.459  | 0.472  | 0.439 | 0.392 | 0.428  | 0.54  |
| 0.4687 | 0.462  | 0.467 | 0.45  | 0.458  | 0.49  |
| 0.472  | 0.462  | 0.449 | 0.443 | 0.451  | 0.475 |
| 0.594  | 0.5847 | 0.607 | 0.592 | 0.61   | 0.619 |
| 0.598  | 0.579  | 0.594 | 0.594 | 0.559  | 0.631 |
| 0.582  | 0.588  | 0.593 | 0.592 | 0.6    | 0.619 |
| 0.61   | 0.587  | 0.582 | 0.598 | 0.594  | 0.619 |
| 0.971  | 1.017  | 0.743 | 0.805 | 0.766  | 0.613 |
| 1.115  | 0.55   | 0.549 | 0.481 | 0.539  | 0.667 |
| 0.502  | 0.986  | 0.807 | 0.797 | 0.785  | 0.744 |
| 0.974  | 0.969  | 0.776 | 0.789 | 0.751  | 0.739 |
| 0.824  | 0.698  | 0.704 | 0.664 | 0.672  | 0.625 |
| 0.807  | 0.579  | 0.627 | 0.576 | 0.585  | 0.631 |
| 0.589  | 0.697  | 0.705 | 0.679 | 0.652  | 0.623 |
| 0.819  | 0.705  | 0.682 | 0.682 | 0.629  | 0.635 |
| 0.068  | 0.101  | 0.068 | 0.075 | 0.08   | 0.116 |
| 0.064  | 0.029  | 0.03  | 0.021 | 0.035  | 0.109 |
| 0.022  | 0.066  | 0.057 | 0.055 | 0.055  | 0.096 |
| 0.053  | 0.063  | 0.036 | 0.042 | 0.051  | 0.084 |

|       |       |       |        |       |       |
|-------|-------|-------|--------|-------|-------|
| 0.229 | 0.237 | 0.248 | 0.242  | 0.279 | 0.285 |
| 0.27  | 0.263 | 0.264 | 0.282  | 0.276 | 0.293 |
| 0.26  | 0.272 | 0.273 | 0.276  | 0.28  | 0.291 |
| 0.294 | 0.28  | 0.276 | 0.28   | 0.281 | 0.284 |
| 0.398 | 0.404 | 0.399 | 0.369  | 0.398 | 0.413 |
| 0.479 | 0.467 | 0.417 | 0.418  | 0.409 | 0.448 |
| 0.427 | 0.504 | 0.457 | 0.447  | 0.461 | 0.457 |
| 0.537 | 0.519 | 0.47  | 0.453  | 0.449 | 0.441 |
| 0.281 | 0.306 | 0.34  | 0.342  | 0.358 | 0.377 |
| 0.355 | 0.351 | 0.335 | 0.382  | 0.368 | 0.388 |
| 0.327 | 0.397 | 0.407 | 0.405  | 0.405 | 0.404 |
| 0.387 | 0.396 | 0.397 | 0.414  | 0.41  | 0.395 |
| 0.5   | 0.477 | 0.561 | 0.543  | 0.632 | 0.701 |
| 0.624 | 0.585 | 0.614 | 0.64   | 0.671 | 0.734 |
| 0.595 | 0.675 | 0.679 | 0.658  | 0.68  | 0.744 |
| 0.72  | 0.66  | 0.658 | 0.727  | 0.746 | 0.767 |
| 0.125 | 0.134 | 0.3   | 0.228  | 0.241 | 0.327 |
| 0.327 | 0.218 | 0.207 | 0.289  | 0.301 | 0.333 |
| 0.234 | 0.411 | 0.355 | 0.342  | 0.343 | 0.32  |
| 0.423 | 0.397 | 0.381 | 0.324  | 0.339 | 0.315 |
| 0.108 | 0.132 | 0.234 | 0.263  | 0.278 | 0.241 |
| 0.344 | 0.27  | 0.288 | 0.237  | 0.269 | 0.245 |
| 0.192 | 0.274 | 0.264 | 0.274  | 0.268 | 0.278 |
| 0.321 | 0.305 | 0.282 | 0.278  | 0.261 | 0.261 |
| 0.373 | 0.486 | 0.789 | 0.9347 | 0.851 | 0.944 |
| 0.662 | 0.825 | 0.874 | 0.954  | 0.948 | 0.883 |
| 0.48  | 0.946 | 1.031 | 0.933  | 0.957 | 0.886 |
| 0.776 | 1.025 | 1.073 | 0.917  | 0.918 | 0.887 |
| 0.266 | 0.411 | 0.746 | 0.8967 | 0.855 | 0.947 |
| 0.27  | 0.605 | 0.789 | 0.885  | 0.921 | 0.992 |
| 0.32  | 0.598 | 0.906 | 0.896  | 0.939 | 0.88  |
| 0.37  | 0.644 | 0.896 | 0.909  | 0.915 | 0.918 |
| 0.592 | 0.474 | 0.593 | 0.53   | 0.634 | 0.748 |
| 0.989 | 0.625 | 0.613 | 0.617  | 0.646 | 0.738 |
| 0.697 | 0.799 | 0.711 | 0.658  | 0.703 | 0.777 |
| 0.975 | 0.783 | 0.699 | 0.675  | 0.706 | 0.779 |
| 0.549 | 0.561 | 0.566 | 0.542  | 0.605 | 0.601 |
| 0.639 | 0.61  | 0.581 | 0.607  | 0.621 | 0.617 |
| 0.576 | 0.651 | 0.611 | 0.601  | 0.657 | 0.634 |
| 0.65  | 0.646 | 0.618 | 0.629  | 0.651 | 0.618 |

|       |       |       |       |        |       |
|-------|-------|-------|-------|--------|-------|
| 0.342 | 0.429 | 0.571 | 0.507 | 0.626  | 0.751 |
| 0.599 | 0.566 | 0.599 | 0.648 | 0.708  | 0.827 |
| 0.44  | 0.734 | 0.724 | 0.753 | 0.792  | 0.79  |
| 0.638 | 0.709 | 0.747 | 0.741 | 0.774  | 0.818 |
| 0.373 | 0.362 | 0.445 | 0.406 | 0.442  | 0.526 |
| 0.453 | 0.49  | 0.464 | 0.562 | 0.511  | 0.609 |
| 0.487 | 0.53  | 0.549 | 0.547 | 0.491  | 0.46  |
| 0.594 | 0.542 | 0.536 | 0.588 | 0.544  | 0.552 |
| 0.549 | 0.567 | 0.657 | 0.552 | 0.647  | 0.73  |
| 0.759 | 0.677 | 0.678 | 0.661 | 0.702  | 0.842 |
| 0.645 | 0.811 | 0.818 | 0.711 | 0.757  | 0.774 |
| 0.821 | 0.799 | 0.808 | 0.727 | 0.772  | 0.789 |
| 0.146 | 0.163 | 0.171 | 0.185 | 0.219  | 0.228 |
| 0.203 | 0.213 | 0.197 | 0.24  | 0.238  | 0.252 |
| 0.182 | 0.241 | 0.239 | 0.262 | 0.258  | 0.246 |
| 0.231 | 0.244 | 0.236 | 0.264 | 0.262  | 0.245 |
| 0.273 | 0.183 | 0.188 | 0.171 | 0.213  | 0.278 |
| 0.57  | 0.241 | 0.207 | 0.244 | 0.25   | 0.317 |
| 0.362 | 0.369 | 0.26  | 0.25  | 0.278  | 0.305 |
| 0.608 | 0.365 | 0.262 | 0.269 | 0.291  | 0.321 |
| 0.496 | 0.451 | 0.399 | 0.363 | 0.435  | 0.49  |
| 0.778 | 0.517 | 0.414 | 0.468 | 0.47   | 0.553 |
| 0.57  | 0.678 | 0.504 | 0.478 | 0.53   | 0.562 |
| 0.862 | 0.65  | 0.492 | 0.489 | 0.53   | 0.57  |
| 0.388 | 0.562 | 0.287 | 0.315 | 0.251  | 0.283 |
| 0.795 | 0.427 | 0.433 | 0.303 | 0.35   | 0.295 |
| 0.468 | 0.401 | 0.525 | 0.385 | 0.353  | 0.35  |
| 0.35  | 0.655 | 0.531 | 0.383 | 0.381  | 0.383 |
| 0.354 | 0.362 | 0.392 | 0.373 | 0.4453 | 0.458 |
| 0.439 | 0.393 | 0.399 | 0.45  | 0.45   | 0.478 |
| 0.38  | 0.449 | 0.429 | 0.442 | 0.442  | 0.46  |
| 0.465 | 0.46  | 0.461 | 0.451 | 0.444  | 0.463 |
| 0.481 | 0.472 | 0.501 | 0.506 | 0.536  | 0.551 |
| 0.551 | 0.494 | 0.499 | 0.52  | 0.535  | 0.55  |
| 0.521 | 0.527 | 0.527 | 0.534 | 0.569  | 0.576 |
| 0.55  | 0.527 | 0.532 | 0.554 | 0.564  | 0.574 |
| 0.511 | 0.554 | 0.585 | 0.528 | 0.608  | 0.692 |
| 0.977 | 0.809 | 0.631 | 0.735 | 0.663  | 0.868 |
| 0.67  | 1.053 | 0.885 | 0.821 | 0.761  | 0.832 |

|       |       |       |       |       |        |
|-------|-------|-------|-------|-------|--------|
| 1.034 | 1.035 | 0.857 | 0.833 | 0.854 | 0.831  |
| 0.579 | 0.538 | 0.514 | 0.509 | 0.603 | 0.635  |
| 0.689 | 0.62  | 0.561 | 0.588 | 0.593 | 0.617  |
| 0.592 | 0.66  | 0.611 | 0.621 | 0.643 | 0.644  |
| 0.734 | 0.657 | 0.597 | 0.622 | 0.651 | 0.65   |
| 0.018 | 0.028 | 0.036 | 0.034 | 0.055 | 0.136  |
| 0.056 | 0.055 | 0.049 | 0.067 | 0.079 | 0.196  |
| 0.035 | 0.102 | 0.081 | 0.066 | 0.093 | 0.178  |
| 0.094 | 0.108 | 0.089 | 0.079 | 0.105 | 0.177  |
| 0.231 | 0.239 | 0.234 | 0.233 | 0.279 | 0.31   |
| 0.281 | 0.244 | 0.24  | 0.245 | 0.267 | 0.303  |
| 0.234 | 0.266 | 0.269 | 0.274 | 0.285 | 0.274  |
| 0.284 | 0.279 | 0.27  | 0.267 | 0.285 | 0.287  |
| 0.367 | 0.457 | 0.437 | 0.377 | 0.475 | 0.4483 |
| 0.472 | 0.466 | 0.458 | 0.404 | 0.452 | 0.476  |
| 0.365 | 0.491 | 0.478 | 0.422 | 0.455 | 0.434  |
| 0.47  | 0.505 | 0.482 | 0.428 | 0.462 | 0.435  |
| 0.277 | 0.315 | 0.307 | 0.308 | 0.37  | 0.374  |
| 0.389 | 0.31  | 0.312 | 0.326 | 0.343 | 0.365  |
| 0.304 | 0.391 | 0.389 | 0.394 | 0.412 | 0.387  |
| 0.406 | 0.403 | 0.394 | 0.401 | 0.403 | 0.386  |
| 0.485 | 0.538 | 0.524 | 0.568 | 0.618 | 0.666  |
| 0.655 | 0.546 | 0.551 | 0.585 | 0.602 | 0.694  |
| 0.492 | 0.703 | 0.675 | 0.678 | 0.669 | 0.703  |
| 0.675 | 0.708 | 0.696 | 0.714 | 0.688 | 0.689  |
| 0.117 | 0.203 | 0.184 | 0.205 | 0.272 | 0.317  |
| 0.334 | 0.19  | 0.237 | 0.247 | 0.27  | 0.225  |
| 0.144 | 0.345 | 0.349 | 0.295 | 0.34  | 0.334  |
| 0.364 | 0.38  | 0.33  | 0.343 | 0.34  | 0.336  |
| 0.114 | 0.201 | 0.168 | 0.179 | 0.235 | 0.274  |
| 0.332 | 0.211 | 0.239 | 0.243 | 0.253 | 0.174  |
| 0.139 | 0.326 | 0.317 | 0.291 | 0.31  | 0.32   |
| 0.372 | 0.368 | 0.294 | 0.32  | 0.32  | 0.307  |
| 0.181 | 0.486 | 0.478 | 0.513 | 0.842 | 0.829  |
| 0.565 | 0.484 | 0.637 | 0.629 | 0.701 | 0.674  |
| 0.215 | 0.815 | 0.863 | 0.752 | 0.847 | 0.895  |

|       |       |       |       |       |       |
|-------|-------|-------|-------|-------|-------|
| 0.613 | 0.834 | 0.861 | 0.848 | 0.89  | 0.841 |
| 0.193 | 0.339 | 0.447 | 0.579 | 0.761 | 0.984 |
| 0.288 | 0.397 | 0.58  | 0.644 | 0.683 | 0.869 |
| 0.249 | 0.553 | 0.755 | 0.804 | 0.806 | 0.895 |
| 0.347 | 0.575 | 0.783 | 0.836 | 0.811 | 0.862 |
| 0.598 | 0.667 | 0.524 | 0.478 | 0.708 | 0.765 |
| 0.971 | 0.647 | 0.6   | 0.551 | 0.651 | 0.724 |
| 0.619 | 0.829 | 0.692 | 0.603 | 0.685 | 0.77  |
| 0.98  | 0.837 | 0.68  | 0.621 | 0.7   | 0.749 |
| 0.531 | 0.563 | 0.562 | 0.605 | 0.695 | 0.688 |
| 0.631 | 0.567 | 0.588 | 0.637 | 0.647 | 0.653 |
| 0.531 | 0.598 | 0.623 | 0.656 | 0.67  | 0.609 |
| 0.611 | 0.628 | 0.633 | 0.671 | 0.67  | 0.601 |
| 0.355 | 0.441 | 0.472 | 0.459 | 0.612 | 0.862 |
| 0.59  | 0.439 | 0.484 | 0.466 | 0.539 | 0.853 |
| 0.371 | 0.671 | 0.705 | 0.673 | 0.711 | 0.854 |
| 0.61  | 0.68  | 0.688 | 0.687 | 0.717 | 0.875 |
| 0.33  | 0.416 | 0.353 | 0.363 | 0.553 | 0.514 |
| 0.413 | 0.408 | 0.388 | 0.405 | 0.466 | 0.502 |
| 0.357 | 0.496 | 0.501 | 0.484 | 0.532 | 0.401 |
| 0.53  | 0.416 | 0.5   | 0.411 | 0.432 | 0.401 |
| 0.508 | 0.538 | 0.483 | 0.488 | 0.65  | 0.753 |
| 0.722 | 0.542 | 0.498 | 0.529 | 0.619 | 0.757 |
| 0.496 | 0.709 | 0.672 | 0.665 | 0.731 | 0.741 |
| 0.745 | 0.745 | 0.678 | 0.692 | 0.752 | 0.733 |
| 0.138 | 0.191 | 0.175 | 0.181 | 0.224 | 0.278 |
| 0.206 | 0.196 | 0.181 | 0.203 | 0.209 | 0.274 |
| 0.147 | 0.252 | 0.259 | 0.259 | 0.252 | 0.266 |
| 0.228 | 0.265 | 0.264 | 0.272 | 0.263 | 0.267 |
| 0.236 | 0.186 | 0.152 | 0.168 | 0.222 | 0.278 |
| 0.504 | 0.192 | 0.168 | 0.184 | 0.2   | 0.273 |
| 0.276 | 0.348 | 0.257 | 0.245 | 0.259 | 0.297 |
| 0.527 | 0.329 | 0.253 | 0.259 | 0.27  | 0.294 |
| 0.498 | 0.521 | 0.376 | 0.36  | 0.483 | 0.564 |
| 0.908 | 0.491 | 0.389 | 0.388 | 0.438 | 0.548 |
| 0.52  | 0.692 | 0.505 | 0.47  | 0.534 | 0.58  |
| 0.717 | 0.679 | 0.495 | 0.501 | 0.543 | 0.583 |
| 0.339 | 0.445 | 0.31  | 0.267 | 0.229 | 0.303 |
| 0.654 | 0.325 | 0.324 | 0.271 | 0.273 | 0.227 |

|        |        |        |        |       |       |
|--------|--------|--------|--------|-------|-------|
| 0.448  | 0.37   | 0.449  | 0.346  | 0.331 | 0.344 |
| 0.387  | 0.58   | 0.49   | 0.328  | 0.362 | 0.369 |
| 0.356  | 0.393  | 0.369  | 0.38   | 0.484 | 0.533 |
| 0.436  | 0.396  | 0.393  | 0.408  | 0.444 | 0.53  |
| 0.356  | 0.453  | 0.435  | 0.44   | 0.471 | 0.484 |
| 0.452  | 0.455  | 0.443  | 0.446  | 0.465 | 0.473 |
| 0.486  | 0.554  | 0.521  | 0.511  | 0.509 | 0.571 |
| 0.547  | 0.555  | 0.534  | 0.527  | 0.501 | 0.555 |
| 0.496  | 0.559  | 0.526  | 0.533  | 0.513 | 0.548 |
| 0.549  | 0.573  | 0.547  | 0.537  | 0.512 | 0.539 |
| 0.608  | 0.723  | 0.576  | 0.531  | 0.728 | 0.898 |
| 1.05   | 0.723  | 0.62   | 0.588  | 0.659 | 0.95  |
| 0.617  | 0.999  | 0.837  | 0.751  | 0.77  | 0.856 |
| 1.067  | 0.845  | 0.874  | 0.804  | 0.8   | 0.803 |
| 0.624  | 0.612  | 0.558  | 0.56   | 0.673 | 0.664 |
| 0.855  | 0.6    | 0.565  | 0.605  | 0.649 | 0.659 |
| 0.635  | 0.739  | 0.678  | 0.656  | 0.72  | 0.72  |
| 0.879  | 0.737  | 0.676  | 0.697  | 0.723 | 0.71  |
| 0.019  | 0.026  | 0.024  | 0.024  | 0.041 | 0.109 |
| 0.061  | 0.03   | 0.026  | 0.03   | 0.04  | 0.112 |
| 0.021  | 0.067  | 0.065  | 0.05   | 0.065 | 0.106 |
| 0.07   | 0.078  | 0.058  | 0.059  | 0.066 | 0.11  |
| 0.2807 | 0.275  | 0.2747 | 0.2723 | 0.263 | 0.289 |
| 0.28   | 0.28   | 0.277  | 0.265  | 0.265 | 0.272 |
| 0.278  | 0.273  | 0.273  | 0.277  | 0.274 | 0.287 |
| 0.284  | 0.272  | 0.274  | 0.275  | 0.271 | 0.282 |
| 0.387  | 0.38   | 0.415  | 0.385  | 0.411 | 0.416 |
| 0.521  | 0.484  | 0.473  | 0.419  | 0.417 | 0.395 |
| 0.506  | 0.454  | 0.449  | 0.419  | 0.44  | 0.426 |
| 0.487  | 0.454  | 0.457  | 0.416  | 0.432 | 0.454 |
| 0.3967 | 0.3903 | 0.358  | 0.3783 | 0.382 | 0.384 |
| 0.386  | 0.398  | 0.389  | 0.377  | 0.397 | 0.364 |
| 0.408  | 0.385  | 0.373  | 0.377  | 0.381 | 0.36  |
| 0.396  | 0.388  | 0.377  | 0.381  | 0.374 | 0.359 |
| 0.557  | 0.562  | 0.605  | 0.606  | 0.618 | 0.651 |
| 0.646  | 0.714  | 0.686  | 0.731  | 0.667 | 0.609 |

|       |        |        |       |       |        |
|-------|--------|--------|-------|-------|--------|
| 0.701 | 0.676  | 0.606  | 0.692 | 0.689 | 0.642  |
| 0.671 | 0.704  | 0.677  | 0.673 | 0.672 | 0.663  |
| 0.163 | 0.144  | 0.258  | 0.269 | 0.326 | 0.408  |
| 0.324 | 0.356  | 0.414  | 0.332 | 0.421 | 0.318  |
| 0.382 | 0.308  | 0.284  | 0.275 | 0.254 | 0.29   |
| 0.325 | 0.397  | 0.369  | 0.416 | 0.338 | 0.369  |
| 0.192 | 0.162  | 0.316  | 0.33  | 0.28  | 0.2703 |
| 0.284 | 0.313  | 0.316  | 0.282 | 0.299 | 0.261  |
| 0.322 | 0.266  | 0.239  | 0.261 | 0.246 | 0.271  |
| 0.28  | 0.294  | 0.259  | 0.28  | 0.272 | 0.279  |
| 0.322 | 0.433  | 0.739  | 0.78  | 0.813 | 0.92   |
| 0.607 | 0.77   | 0.945  | 0.881 | 0.868 | 0.937  |
| 0.647 | 0.738  | 0.809  | 0.776 | 0.663 | 0.794  |
| 0.664 | 0.84   | 0.884  | 0.79  | 0.755 | 0.813  |
| 0.234 | 0.359  | 0.622  | 0.739 | 0.771 | 0.896  |
| 0.275 | 0.531  | 0.729  | 0.848 | 0.841 | 0.883  |
| 0.36  | 0.483  | 0.656  | 0.76  | 0.656 | 0.731  |
| 0.344 | 0.538  | 0.691  | 0.791 | 0.738 | 0.792  |
| 0.565 | 0.498  | 0.582  | 0.542 | 0.587 | 0.648  |
| 0.909 | 0.688  | 0.627  | 0.579 | 0.628 | 0.629  |
| 0.837 | 0.736  | 0.66   | 0.606 | 0.63  | 0.7    |
| 0.865 | 0.747  | 0.675  | 0.614 | 0.64  | 0.679  |
| 0.56  | 0.529  | 0.6263 | 0.636 | 0.562 | 0.626  |
| 0.629 | 0.607  | 0.623  | 0.627 | 0.616 | 0.557  |
| 0.642 | 0.622  | 0.633  | 0.637 | 0.65  | 0.593  |
| 0.657 | 0.616  | 0.623  | 0.614 | 0.588 | 0.629  |
| 0.433 | 0.7107 | 0.595  | 0.583 | 0.67  | 0.766  |
| 0.678 | 0.714  | 0.752  | 0.662 | 0.765 | 0.669  |
| 0.675 | 0.698  | 0.725  | 0.713 | 0.72  | 0.752  |
| 0.66  | 0.72   | 0.758  | 0.724 | 0.744 | 0.761  |
| 0.378 | 0.354  | 0.429  | 0.441 | 0.454 | 0.503  |
| 0.562 | 0.512  | 0.509  | 0.52  | 0.521 | 0.45   |
| 0.469 | 0.506  | 0.506  | 0.527 | 0.53  | 0.53   |
| 0.525 | 0.532  | 0.558  | 0.558 | 0.548 | 0.51   |
| 0.584 | 0.622  | 0.644  | 0.694 | 0.704 | 0.795  |
| 0.831 | 0.807  | 0.741  | 0.773 | 0.82  | 0.727  |
| 0.833 | 0.785  | 0.707  | 0.744 | 0.718 | 0.734  |
| 0.782 | 0.793  | 0.727  | 0.739 | 0.776 | 0.798  |
| 0.174 | 0.19   | 0.187  | 0.218 | 0.233 | 0.257  |

|       |       |       |       |       |       |
|-------|-------|-------|-------|-------|-------|
| 0.218 | 0.27  | 0.244 | 0.269 | 0.266 | 0.236 |
| 0.249 | 0.237 | 0.214 | 0.245 | 0.231 | 0.222 |
| 0.226 | 0.245 | 0.229 | 0.247 | 0.237 | 0.232 |
| 0.258 | 0.176 | 0.182 | 0.194 | 0.224 | 0.304 |
| 0.435 | 0.253 | 0.237 | 0.246 | 0.275 | 0.29  |
| 0.489 | 0.286 | 0.213 | 0.216 | 0.228 | 0.275 |
| 0.422 | 0.284 | 0.229 | 0.223 | 0.242 | 0.279 |
| 0.614 | 0.48  | 0.45  | 0.45  | 0.512 | 0.636 |
| 0.935 | 0.677 | 0.523 | 0.532 | 0.579 | 0.554 |
| 0.807 | 0.636 | 0.489 | 0.476 | 0.508 | 0.592 |
| 0.885 | 0.626 | 0.495 | 0.495 | 0.529 | 0.614 |
| 0.315 | 0.44  | 0.258 | 0.27  | 0.251 | 0.255 |
| 0.605 | 0.555 | 0.439 | 0.307 | 0.284 | 0.373 |
| 0.327 | 0.293 | 0.438 | 0.31  | 0.31  | 0.315 |
| 0.362 | 0.543 | 0.436 | 0.328 | 0.306 | 0.319 |
| 0.336 | 0.341 | 0.357 | 0.374 | 0.408 | 0.437 |
| 0.427 | 0.411 | 0.42  | 0.425 | 0.444 | 0.414 |
| 0.399 | 0.421 | 0.395 | 0.435 | 0.425 | 0.445 |
| 0.423 | 0.433 | 0.422 | 0.429 | 0.458 | 0.44  |
| 0.482 | 0.504 | 0.514 | 0.56  | 0.525 | 0.518 |
| 0.549 | 0.531 | 0.518 | 0.57  | 0.516 | 0.502 |
| 0.521 | 0.568 | 0.547 | 0.593 | 0.556 | 0.533 |
| 0.556 | 0.565 | 0.547 | 0.583 | 0.556 | 0.521 |
| 0.559 | 0.55  | 0.578 | 0.53  | 0.564 | 0.577 |
| 0.769 | 0.752 | 0.703 | 0.652 | 0.691 | 0.619 |
| 0.796 | 0.899 | 0.748 | 0.685 | 0.698 | 0.646 |
| 0.958 | 0.961 | 0.797 | 0.635 | 0.701 | 0.592 |
| 0.587 | 0.546 | 0.58  | 0.581 | 0.588 | 0.607 |
| 0.671 | 0.605 | 0.587 | 0.589 | 0.597 | 0.605 |
| 0.655 | 0.624 | 0.585 | 0.578 | 0.585 | 0.61  |
| 0.669 | 0.625 | 0.583 | 0.591 | 0.589 | 0.588 |
| 0.031 | 0.027 | 0.037 | 0.04  | 0.047 | 0.092 |
| 0.077 | 0.1   | 0.079 | 0.079 | 0.084 | 0.072 |
| 0.1   | 0.066 | 0.051 | 0.051 | 0.049 | 0.078 |
| 0.082 | 0.072 | 0.069 | 0.065 | 0.065 | 0.098 |
| 0.243 | 0.238 | 0.267 | 0.271 | 0.261 | 0.272 |

|        |        |       |        |       |        |
|--------|--------|-------|--------|-------|--------|
| 0.299  | 0.307  | 0.274 | 0.308  | 0.294 | 0.272  |
| 0.269  | 0.276  | 0.271 | 0.288  | 0.29  | 0.272  |
| 0.279  | 0.302  | 0.295 | 0.315  | 0.26  | 0.268  |
| 0.415  | 0.409  | 0.45  | 0.399  | 0.405 | 0.449  |
| 0.536  | 0.507  | 0.481 | 0.481  | 0.461 | 0.487  |
| 0.495  | 0.474  | 0.441 | 0.426  | 0.419 | 0.444  |
| 0.538  | 0.515  | 0.464 | 0.436  | 0.409 | 0.437  |
| 0.314  | 0.326  | 0.377 | 0.3833 | 0.385 | 0.399  |
| 0.36   | 0.389  | 0.407 | 0.385  | 0.402 | 0.39   |
| 0.349  | 0.376  | 0.394 | 0.376  | 0.408 | 0.389  |
| 0.383  | 0.385  | 0.393 | 0.389  | 0.381 | 0.374  |
| 0.6857 | 0.6733 | 0.638 | 0.601  | 0.621 | 0.677  |
| 0.683  | 0.687  | 0.763 | 0.75   | 0.69  | 0.671  |
| 0.659  | 0.648  | 0.688 | 0.674  | 0.699 | 0.681  |
| 0.715  | 0.685  | 0.745 | 0.753  | 0.589 | 0.58   |
| 0.3143 | 0.3487 | 0.286 | 0.327  | 0.313 | 0.367  |
| 0.274  | 0.404  | 0.364 | 0.317  | 0.37  | 0.187  |
| 0.319  | 0.317  | 0.279 | 0.244  | 0.284 | 0.322  |
| 0.35   | 0.325  | 0.336 | 0.25   | 0.259 | 0.282  |
| 0.2833 | 0.2893 | 0.341 | 0.235  | 0.24  | 0.279  |
| 0.255  | 0.305  | 0.285 | 0.295  | 0.305 | 0.2737 |
| 0.282  | 0.261  | 0.226 | 0.233  | 0.271 | 0.288  |
| 0.313  | 0.302  | 0.286 | 0.272  | 0.26  | 0.254  |
| 0.236  | 0.459  | 0.856 | 0.618  | 0.848 | 0.987  |
| 0.545  | 0.806  | 0.879 | 0.85   | 0.827 | 0.747  |
| 0.45   | 0.785  | 0.832 | 0.703  | 0.718 | 0.884  |
| 0.609  | 0.794  | 0.891 | 0.756  | 0.614 | 0.85   |
| 0.208  | 0.318  | 0.66  | 0.678  | 0.828 | 0.782  |
| 0.213  | 0.47   | 0.713 | 0.815  | 0.852 | 0.77   |
| 0.235  | 0.438  | 0.64  | 0.74   | 0.736 | 0.799  |
| 0.281  | 0.468  | 0.725 | 0.789  | 0.724 | 0.777  |
| 0.62   | 0.542  | 0.592 | 0.56   | 0.622 | 0.764  |
| 1.02   | 0.816  | 0.626 | 0.617  | 0.683 | 0.667  |
| 0.794  | 0.849  | 0.618 | 0.65   | 0.664 | 0.759  |
| 1.038  | 0.815  | 0.641 | 0.642  | 0.592 | 0.744  |
| 0.595  | 0.574  | 0.599 | 0.584  | 0.593 | 0.666  |
| 0.685  | 0.694  | 0.624 | 0.651  | 0.633 | 0.658  |
| 0.611  | 0.645  | 0.611 | 0.61   | 0.637 | 0.63   |
| 0.651  | 0.639  | 0.625 | 0.659  | 0.574 | 0.608  |

|       |        |       |       |       |       |
|-------|--------|-------|-------|-------|-------|
| 0.391 | 0.391  | 0.62  | 0.622 | 0.664 | 0.763 |
| 0.582 | 0.653  | 0.701 | 0.608 | 0.738 | 0.704 |
| 0.506 | 0.616  | 0.654 | 0.627 | 0.706 | 0.73  |
| 0.62  | 0.646  | 0.695 | 0.631 | 0.591 | 0.686 |
| 0.399 | 0.4983 | 0.493 | 0.467 | 0.53  | 0.461 |
| 0.514 | 0.5    | 0.48  | 0.505 | 0.481 | 0.456 |
| 0.533 | 0.511  | 0.492 | 0.527 | 0.504 | 0.486 |
| 0.613 | 0.484  | 0.468 | 0.555 | 0.437 | 0.456 |
| 0.605 | 0.802  | 0.784 | 0.786 | 0.776 | 0.84  |
| 0.852 | 0.816  | 0.784 | 0.781 | 0.816 | 0.805 |
| 0.753 | 0.772  | 0.775 | 0.772 | 0.837 | 0.851 |
| 0.861 | 0.818  | 0.793 | 0.805 | 0.77  | 0.828 |
| 0.171 | 0.174  | 0.229 | 0.219 | 0.239 | 0.271 |
| 0.216 | 0.261  | 0.27  | 0.281 | 0.264 | 0.275 |
| 0.213 | 0.241  | 0.241 | 0.255 | 0.227 | 0.252 |
| 0.236 | 0.257  | 0.267 | 0.267 | 0.216 | 0.222 |
| 0.256 | 0.186  | 0.21  | 0.181 | 0.227 | 0.311 |
| 0.442 | 0.318  | 0.24  | 0.245 | 0.271 | 0.28  |
| 0.403 | 0.345  | 0.221 | 0.217 | 0.243 | 0.286 |
| 0.519 | 0.303  | 0.246 | 0.235 | 0.212 | 0.265 |
| 0.625 | 0.488  | 0.507 | 0.426 | 0.529 | 0.648 |
| 0.896 | 0.777  | 0.573 | 0.544 | 0.592 | 0.601 |
| 0.769 | 0.71   | 0.525 | 0.478 | 0.528 | 0.594 |
| 0.8   | 0.747  | 0.561 | 0.507 | 0.477 | 0.569 |
| 0.377 | 0.48   | 0.277 | 0.357 | 0.227 | 0.3   |
| 0.777 | 0.406  | 0.516 | 0.357 | 0.315 | 0.373 |
| 0.467 | 0.358  | 0.548 | 0.356 | 0.335 | 0.37  |
| 0.416 | 0.667  | 0.571 | 0.381 | 0.38  | 0.297 |
| 0.36  | 0.356  | 0.405 | 0.376 | 0.447 | 0.456 |
| 0.448 | 0.46   | 0.455 | 0.428 | 0.456 | 0.461 |
| 0.413 | 0.457  | 0.424 | 0.427 | 0.423 | 0.447 |
| 0.463 | 0.472  | 0.464 | 0.442 | 0.412 | 0.42  |
| 0.518 | 0.5443 | 0.541 | 0.523 | 0.527 | 0.563 |
| 0.592 | 0.536  | 0.552 | 0.565 | 0.519 | 0.541 |
| 0.549 | 0.554  | 0.559 | 0.571 | 0.54  | 0.555 |
| 0.593 | 0.543  | 0.545 | 0.576 | 0.527 | 0.555 |
| 0.644 | 0.591  | 0.696 | 0.653 | 0.642 | 0.773 |
| 1.061 | 0.911  | 0.811 | 0.832 | 0.779 | 0.782 |
| 0.857 | 1.004  | 0.779 | 0.819 | 0.772 | 0.748 |
| 0.899 | 0.862  | 0.839 | 0.867 | 0.629 | 0.688 |

|       |       |        |        |       |       |
|-------|-------|--------|--------|-------|-------|
| 0.556 | 0.642 | 0.631  | 0.567  | 0.611 | 0.627 |
| 0.663 | 0.647 | 0.629  | 0.639  | 0.603 | 0.605 |
| 0.625 | 0.642 | 0.634  | 0.643  | 0.628 | 0.648 |
| 0.692 | 0.637 | 0.63   | 0.645  | 0.576 | 0.626 |
| 0.03  | 0.029 | 0.048  | 0.036  | 0.059 | 0.112 |
| 0.064 | 0.108 | 0.08   | 0.079  | 0.094 | 0.137 |
| 0.044 | 0.082 | 0.062  | 0.056  | 0.063 | 0.113 |
| 0.097 | 0.113 | 0.08   | 0.073  | 0.072 | 0.09  |
| 0.291 | 0.278 | 0.293  | 0.305  | 0.311 | 0.316 |
| 0.289 | 0.28  | 0.307  | 0.286  | 0.302 | 0.305 |
| 0.333 | 0.328 | 0.318  | 0.312  | 0.314 | 0.319 |
| 0.315 | 0.296 | 0.296  | 0.285  | 0.292 | 0.3   |
| 0.558 | 0.527 | 0.469  | 0.502  | 0.509 | 0.544 |
| 0.561 | 0.544 | 0.5    | 0.502  | 0.514 | 0.556 |
| 0.601 | 0.576 | 0.548  | 0.531  | 0.538 | 0.572 |
| 0.579 | 0.55  | 0.5    | 0.494  | 0.519 | 0.554 |
| 0.359 | 0.385 | 0.34   | 0.365  | 0.382 | 0.347 |
| 0.385 | 0.429 | 0.388  | 0.406  | 0.428 | 0.39  |
| 0.391 | 0.423 | 0.395  | 0.386  | 0.405 | 0.389 |
| 0.412 | 0.456 | 0.442  | 0.458  | 0.45  | 0.421 |
| 0.585 | 0.558 | 0.587  | 0.609  | 0.616 | 0.596 |
| 0.623 | 0.611 | 0.626  | 0.629  | 0.658 | 0.635 |
| 0.633 | 0.618 | 0.659  | 0.63   | 0.651 | 0.637 |
| 0.711 | 0.724 | 0.685  | 0.717  | 0.72  | 0.73  |
| 0.225 | 0.211 | 0.27   | 0.25   | 0.161 | 0.176 |
| 0.357 | 0.42  | 0.275  | 0.371  | 0.378 | 0.335 |
| 0.35  | 0.301 | 0.31   | 0.298  | 0.254 | 0.3   |
| 0.516 | 0.498 | 0.471  | 0.429  | 0.396 | 0.442 |
| 0.229 | 0.197 | 0.211  | 0.252  | 0.183 | 0.177 |
| 0.26  | 0.291 | 0.283  | 0.297  | 0.298 | 0.259 |
| 0.369 | 0.379 | 0.302  | 0.316  | 0.312 | 0.368 |
| 0.286 | 0.289 | 0.2653 | 0.2883 | 0.48  | 0.44  |
| 0.475 | 0.726 | 0.863  | 0.91   | 0.691 | 0.66  |
| 0.441 | 0.792 | 0.871  | 0.899  | 0.779 | 0.82  |
| 0.533 | 0.815 | 0.889  | 0.908  | 0.68  | 0.7   |
| 0.637 | 0.955 | 0.98   | 0.888  | 0.903 | 0.858 |

|        |        |       |       |        |       |
|--------|--------|-------|-------|--------|-------|
| 0.173  | 0.423  | 0.67  | 0.802 | 0.75   | 0.744 |
| 0.194  | 0.457  | 0.733 | 0.791 | 0.786  | 0.785 |
| 0.177  | 0.415  | 0.697 | 0.714 | 0.7577 | 0.75  |
| 0.241  | 0.472  | 0.744 | 0.767 | 0.737  | 0.802 |
| 1.068  | 0.831  | 0.703 | 0.738 | 0.72   | 0.755 |
| 0.977  | 0.824  | 0.705 | 0.727 | 0.72   | 0.735 |
| 1.116  | 0.841  | 0.757 | 0.745 | 0.704  | 0.756 |
| 0.981  | 0.759  | 0.679 | 0.656 | 0.645  | 0.686 |
| 0.762  | 0.791  | 0.72  | 0.774 | 0.722  | 0.752 |
| 0.719  | 0.771  | 0.684 | 0.731 | 0.677  | 0.737 |
| 0.75   | 0.818  | 0.719 | 0.748 | 0.705  | 0.779 |
| 0.746  | 0.81   | 0.686 | 0.741 | 0.695  | 0.749 |
| 0.628  | 0.629  | 0.637 | 0.705 | 0.666  | 0.679 |
| 0.639  | 0.673  | 0.676 | 0.682 | 0.687  | 0.676 |
| 0.643  | 0.679  | 0.686 | 0.653 | 0.675  | 0.721 |
| 0.703  | 0.6603 | 0.724 | 0.725 | 0.739  | 0.692 |
| 0.533  | 0.503  | 0.566 | 0.57  | 0.53   | 0.535 |
| 0.495  | 0.485  | 0.501 | 0.517 | 0.495  | 0.487 |
| 0.555  | 0.53   | 0.554 | 0.538 | 0.535  | 0.56  |
| 0.503  | 0.484  | 0.48  | 0.522 | 0.501  | 0.49  |
| 0.765  | 0.705  | 0.699 | 0.843 | 0.784  | 0.836 |
| 0.836  | 0.815  | 0.799 | 0.862 | 0.829  | 0.877 |
| 0.888  | 0.788  | 0.802 | 0.875 | 0.83   | 0.922 |
| 0.8297 | 0.7693 | 0.807 | 0.86  | 0.944  | 1.051 |
| 0.202  | 0.23   | 0.242 | 0.251 | 0.242  | 0.23  |
| 0.2    | 0.236  | 0.244 | 0.244 | 0.238  | 0.226 |
| 0.218  | 0.246  | 0.275 | 0.25  | 0.252  | 0.25  |
| 0.249  | 0.287  | 0.288 | 0.284 | 0.284  | 0.291 |
| 0.639  | 0.359  | 0.23  | 0.239 | 0.242  | 0.285 |
| 0.659  | 0.406  | 0.274 | 0.256 | 0.264  | 0.326 |
| 0.757  | 0.41   | 0.273 | 0.255 | 0.26   | 0.312 |
| 0.785  | 0.458  | 0.305 | 0.288 | 0.289  | 0.355 |
| 0.8    | 0.615  | 0.488 | 0.504 | 0.484  | 0.596 |
| 1.058  | 0.71   | 0.58  | 0.556 | 0.578  | 0.644 |
| 0.909  | 0.666  | 0.566 | 0.517 | 0.51   | 0.612 |
| 1.295  | 0.803  | 0.634 | 0.603 | 0.605  | 0.705 |
| 0.588  | 0.763  | 0.131 | 0.333 | 0.361  | 0.323 |
| 0.704  | 0.781  | 0.379 | 0.399 | 0.413  | 0.367 |
| 0.669  | 0.527  | 0.314 | 0.337 | 0.357  | 0.332 |

|       |       |        |       |        |        |
|-------|-------|--------|-------|--------|--------|
| 0.601 | 0.528 | 0.362  | 0.344 | 0.397  | 0.354  |
| 0.462 | 0.494 | 0.506  | 0.524 | 0.495  | 0.481  |
| 0.449 | 0.501 | 0.477  | 0.476 | 0.488  | 0.471  |
| 0.488 | 0.533 | 0.519  | 0.5   | 0.505  | 0.5    |
| 0.48  | 0.532 | 0.475  | 0.493 | 0.507  | 0.472  |
| 0.603 | 0.609 | 0.609  | 0.603 | 0.617  | 0.617  |
| 0.618 | 0.589 | 0.624  | 0.579 | 0.641  | 0.65   |
| 0.655 | 0.659 | 0.648  | 0.629 | 0.648  | 0.69   |
| 0.619 | 0.639 | 0.62   | 0.598 | 0.622  | 0.654  |
| 1.214 | 1.16  | 0.926  | 0.948 | 0.96   | 0.985  |
| 1.124 | 1.159 | 0.967  | 0.923 | 0.929  | 0.977  |
| 1.293 | 1.275 | 1.081  | 1.013 | 0.991  | 1.062  |
| 1.095 | 1.132 | 0.926  | 0.875 | 0.868  | 0.897  |
| 0.766 | 0.775 | 0.724  | 0.71  | 0.674  | 0.677  |
| 0.805 | 0.832 | 0.781  | 0.788 | 0.762  | 0.745  |
| 0.796 | 0.81  | 0.771  | 0.734 | 0.708  | 0.729  |
| 0.89  | 0.934 | 0.851  | 0.779 | 0.788  | 0.801  |
| 0.052 | 0.062 | 0.05   | 0.063 | 0.049  | 0.07   |
| 0.06  | 0.075 | 0.067  | 0.057 | 0.061  | 0.08   |
| 0.07  | 0.083 | 0.077  | 0.06  | 0.074  | 0.084  |
| 0.08  | 0.097 | 0.083  | 0.093 | 0.072  | 0.09   |
| 0.294 | 0.298 | 0.276  | 0.286 | 0.306  | 0.292  |
| 0.297 | 0.302 | 0.288  | 0.298 | 0.304  | 0.294  |
| 0.321 | 0.308 | 0.288  | 0.309 | 0.301  | 0.2923 |
| 0.334 | 0.319 | 0.297  | 0.303 | 0.312  | 0.291  |
| 0.503 | 0.477 | 0.457  | 0.471 | 0.463  | 0.439  |
| 0.514 | 0.472 | 0.473  | 0.487 | 0.469  | 0.455  |
| 0.524 | 0.47  | 0.461  | 0.483 | 0.454  | 0.427  |
| 0.513 | 0.503 | 0.478  | 0.491 | 0.464  | 0.44   |
| 0.41  | 0.411 | 0.415  | 0.411 | 0.39   | 0.392  |
| 0.391 | 0.418 | 0.419  | 0.427 | 0.374  | 0.413  |
| 0.422 | 0.426 | 0.434  | 0.415 | 0.354  | 0.359  |
| 0.436 | 0.437 | 0.4227 | 0.419 | 0.3727 | 0.386  |
| 0.688 | 0.707 | 0.718  | 0.714 | 0.745  | 0.65   |
| 0.66  | 0.732 | 0.729  | 0.713 | 0.697  | 0.673  |
| 0.711 | 0.749 | 0.74   | 0.739 | 0.686  | 0.569  |

|       |       |        |       |        |       |
|-------|-------|--------|-------|--------|-------|
| 0.714 | 0.747 | 0.753  | 0.752 | 0.758  | 0.621 |
| 0.561 | 0.648 | 0.626  | 0.585 | 0.647  | 0.608 |
| 0.63  | 0.693 | 0.647  | 0.579 | 0.638  | 0.657 |
| 0.618 | 0.572 | 0.607  | 0.57  | 0.73   | 0.704 |
| 0.605 | 0.662 | 0.647  | 0.677 | 0.824  | 0.641 |
| 0.135 | 0.139 | 0.132  | 0.131 | 0.151  | 0.151 |
| 0.13  | 0.17  | 0.154  | 0.158 | 0.133  | 0.169 |
| 0.173 | 0.154 | 0.165  | 0.155 | 0.14   | 0.104 |
| 0.166 | 0.174 | 0.179  | 0.167 | 0.1413 | 0.161 |
| 0.425 | 0.585 | 0.723  | 0.695 | 0.743  | 0.813 |
| 0.391 | 0.659 | 0.741  | 0.709 | 0.566  | 0.858 |
| 0.466 | 0.564 | 0.696  | 0.638 | 0.665  | 0.832 |
| 0.39  | 0.576 | 0.721  | 0.657 | 0.731  | 0.875 |
| 0.213 | 0.315 | 0.536  | 0.613 | 0.678  | 0.766 |
| 0.201 | 0.395 | 0.581  | 0.651 | 0.607  | 0.802 |
| 0.246 | 0.337 | 0.571  | 0.66  | 0.78   | 0.819 |
| 0.231 | 0.361 | 0.595  | 0.64  | 0.6883 | 0.826 |
| 1.007 | 0.871 | 0.698  | 0.694 | 0.762  | 0.817 |
| 0.953 | 0.921 | 0.732  | 0.687 | 0.655  | 0.833 |
| 1.073 | 0.856 | 0.697  | 0.669 | 0.698  | 0.779 |
| 1.008 | 0.861 | 0.716  | 0.681 | 0.74   | 0.814 |
| 0.68  | 0.665 | 0.632  | 0.632 | 0.632  | 0.615 |
| 0.683 | 0.66  | 0.652  | 0.654 | 0.63   | 0.637 |
| 0.697 | 0.651 | 0.632  | 0.633 | 0.601  | 0.59  |
| 0.702 | 0.677 | 0.655  | 0.645 | 0.64   | 0.614 |
| 0.515 | 0.611 | 0.57   | 0.584 | 0.571  | 0.61  |
| 0.539 | 0.629 | 0.625  | 0.596 | 0.595  | 0.666 |
| 0.589 | 0.574 | 0.58   | 0.606 | 0.619  | 0.58  |
| 0.574 | 0.588 | 0.605  | 0.569 | 0.595  | 0.615 |
| 0.632 | 0.619 | 0.578  | 0.63  | 0.653  | 0.598 |
| 0.674 | 0.638 | 0.658  | 0.665 | 0.609  | 0.671 |
| 0.73  | 0.637 | 0.662  | 0.705 | 0.625  | 0.544 |
| 0.737 | 0.692 | 0.721  | 0.684 | 0.735  | 0.66  |
| 0.692 | 0.716 | 0.729  | 0.722 | 0.684  | 0.68  |
| 0.749 | 0.723 | 0.776  | 0.712 | 0.65   | 0.717 |
| 0.824 | 0.797 | 0.76   | 0.779 | 0.708  | 0.67  |
| 0.81  | 0.811 | 0.776  | 0.78  | 0.784  | 0.74  |
| 0.171 | 0.19  | 0.1893 | 0.196 | 0.192  | 0.183 |
| 0.181 | 0.192 | 0.19   | 0.194 | 0.179  | 0.197 |

|       |       |       |       |        |       |
|-------|-------|-------|-------|--------|-------|
| 0.198 | 0.193 | 0.186 | 0.201 | 0.188  | 0.171 |
| 0.184 | 0.194 | 0.192 | 0.199 | 0.1863 | 0.191 |
| 0.592 | 0.402 | 0.255 | 0.289 | 0.333  | 0.393 |
| 0.604 | 0.433 | 0.279 | 0.308 | 0.311  | 0.407 |
| 0.615 | 0.436 | 0.27  | 0.302 | 0.33   | 0.335 |
| 0.609 | 0.453 | 0.27  | 0.318 | 0.347  | 0.377 |
| 0.951 | 0.815 | 0.606 | 0.623 | 0.783  | 0.753 |
| 0.945 | 0.874 | 0.687 | 0.665 | 0.676  | 0.762 |
| 1.091 | 0.853 | 0.621 | 0.617 | 0.738  | 0.701 |
| 1.063 | 0.8   | 0.624 | 0.661 | 0.847  | 0.757 |
| 0.463 | 0.297 | 0.426 | 0.319 | 0.296  | 0.349 |
| 0.533 | 0.469 | 0.439 | 0.324 | 0.344  | 0.296 |
| 0.322 | 0.368 | 0.428 | 0.335 | 0.351  | 0.544 |
| 0.359 | 0.449 | 0.475 | 0.335 | 0.3303 | 0.656 |
| 0.467 | 0.519 | 0.5   | 0.519 | 0.519  | 0.524 |
| 0.455 | 0.531 | 0.529 | 0.529 | 0.481  | 0.575 |
| 0.532 | 0.498 | 0.515 | 0.519 | 0.469  | 0.504 |
| 0.492 | 0.512 | 0.516 | 0.534 | 0.48   | 0.552 |
| 0.573 | 0.577 | 0.547 | 0.552 | 0.548  | 0.554 |
| 0.567 | 0.608 | 0.563 | 0.566 | 0.56   | 0.565 |
| 0.605 | 0.563 | 0.555 | 0.564 | 0.552  | 0.54  |
| 0.573 | 0.586 | 0.566 | 0.577 | 0.561  | 0.564 |
| 0.771 | 0.889 | 0.759 | 0.701 | 0.748  | 0.696 |
| 0.789 | 0.937 | 0.834 | 0.744 | 0.707  | 0.757 |
| 0.863 | 0.93  | 0.842 | 0.801 | 0.724  | 0.655 |
| 0.839 | 1.006 | 0.889 | 0.756 | 0.802  | 0.73  |
| 0.671 | 0.655 | 0.63  | 0.598 | 0.628  | 0.601 |
| 0.648 | 0.717 | 0.665 | 0.616 | 0.595  | 0.618 |
| 0.765 | 0.67  | 0.621 | 0.601 | 0.626  | 0.59  |
| 0.686 | 0.679 | 0.64  | 0.611 | 0.6163 | 0.613 |
| 0.062 | 0.085 | 0.099 | 0.15  | 0.238  | 0.372 |
| 0.079 | 0.113 | 0.125 | 0.171 | 0.192  | 0.466 |
| 0.104 | 0.117 | 0.13  | 0.207 | 0.268  | 0.328 |
| 0.092 | 0.123 | 0.138 | 0.218 | 0.2327 | 0.491 |
| 0.305 | 0.314 | 0.291 | 0.307 | 0.295  | 0.307 |
| 0.303 | 0.322 | 0.298 | 0.311 | 0.304  | 0.304 |

|       |       |       |       |        |       |
|-------|-------|-------|-------|--------|-------|
| 0.305 | 0.311 | 0.274 | 0.303 | 0.248  | 0.275 |
| 0.304 | 0.318 | 0.278 | 0.309 | 0.279  | 0.279 |
| 0.517 | 0.526 | 0.473 | 0.468 | 0.471  | 0.462 |
| 0.518 | 0.523 | 0.476 | 0.468 | 0.473  | 0.458 |
| 0.542 | 0.496 | 0.462 | 0.45  | 0.4623 | 0.435 |
| 0.5   | 0.499 | 0.453 | 0.454 | 0.443  | 0.433 |
| 0.412 | 0.4   | 0.422 | 0.412 | 0.437  | 0.413 |
| 0.408 | 0.405 | 0.442 | 0.411 | 0.438  | 0.424 |
| 0.429 | 0.399 | 0.453 | 0.422 | 0.402  | 0.414 |
| 0.428 | 0.405 | 0.439 | 0.419 | 0.442  | 0.412 |
| 0.695 | 0.724 | 0.69  | 0.686 | 0.674  | 0.713 |
| 0.691 | 0.72  | 0.684 | 0.701 | 0.658  | 0.706 |
| 0.69  | 0.757 | 0.724 | 0.74  | 0.6743 | 0.7   |
| 0.716 | 0.745 | 0.708 | 0.733 | 0.691  | 0.701 |
| 0.675 | 0.739 | 0.75  | 0.762 | 0.741  | 0.763 |
| 0.622 | 0.661 | 0.65  | 0.715 | 0.693  | 0.868 |
| 0.756 | 0.637 | 0.703 | 0.694 | 0.591  | 0.781 |
| 0.671 | 0.771 | 0.719 | 0.725 | 0.69   | 0.788 |
| 0.14  | 0.153 | 0.144 | 0.147 | 0.156  | 0.171 |
| 0.12  | 0.164 | 0.13  | 0.161 | 0.157  | 0.167 |
| 0.172 | 0.148 | 0.179 | 0.158 | 0.1533 | 0.146 |
| 0.159 | 0.162 | 0.153 | 0.149 | 0.147  | 0.154 |
| 0.344 | 0.588 | 0.702 | 0.658 | 0.641  | 0.836 |
| 0.409 | 0.726 | 0.75  | 0.686 | 0.599  | 0.749 |
| 0.511 | 0.566 | 0.784 | 0.636 | 0.524  | 0.818 |
| 0.385 | 0.607 | 0.695 | 0.616 | 0.589  | 0.778 |
| 0.208 | 0.336 | 0.489 | 0.538 | 0.627  | 0.691 |
| 0.217 | 0.395 | 0.524 | 0.546 | 0.597  | 0.654 |
| 0.27  | 0.363 | 0.595 | 0.571 | 0.551  | 0.715 |
| 0.218 | 0.38  | 0.556 | 0.552 | 0.64   | 0.716 |
| 0.991 | 0.79  | 0.681 | 0.636 | 0.71   | 0.781 |
| 0.9   | 0.792 | 0.68  | 0.673 | 0.719  | 0.775 |
| 0.98  | 0.755 | 0.698 | 0.62  | 0.665  | 0.747 |
| 0.912 | 0.799 | 0.667 | 0.629 | 0.679  | 0.749 |
| 0.68  | 0.705 | 0.679 | 0.672 | 0.664  | 0.687 |
| 0.648 | 0.71  | 0.681 | 0.684 | 0.66   | 0.67  |
| 0.688 | 0.664 | 0.661 | 0.663 | 0.612  | 0.622 |
| 0.647 | 0.672 | 0.651 | 0.653 | 0.618  | 0.635 |
| 0.571 | 0.654 | 0.664 | 0.689 | 0.644  | 0.729 |

|        |        |       |       |        |       |
|--------|--------|-------|-------|--------|-------|
| 0.531  | 0.666  | 0.631 | 0.694 | 0.641  | 0.752 |
| 0.609  | 0.586  | 0.628 | 0.653 | 0.593  | 0.657 |
| 0.593  | 0.642  | 0.619 | 0.665 | 0.604  | 0.691 |
| 0.681  | 0.704  | 0.718 | 0.662 | 0.687  | 0.73  |
| 0.7053 | 0.738  | 0.712 | 0.661 | 0.701  | 0.769 |
| 0.757  | 0.668  | 0.66  | 0.601 | 0.563  | 0.624 |
| 0.678  | 0.666  | 0.65  | 0.64  | 0.626  | 0.645 |
| 0.7    | 0.751  | 0.744 | 0.728 | 0.73   | 0.787 |
| 0.688  | 0.788  | 0.744 | 0.733 | 0.732  | 0.782 |
| 0.766  | 0.786  | 0.79  | 0.733 | 0.7253 | 0.731 |
| 0.784  | 0.821  | 0.728 | 0.767 | 0.714  | 0.73  |
| 0.196  | 0.227  | 0.217 | 0.229 | 0.243  | 0.241 |
| 0.19   | 0.234  | 0.218 | 0.234 | 0.246  | 0.238 |
| 0.21   | 0.226  | 0.224 | 0.233 | 0.22   | 0.221 |
| 0.207  | 0.233  | 0.218 | 0.231 | 0.241  | 0.226 |
| 0.528  | 0.337  | 0.25  | 0.24  | 0.276  | 0.358 |
| 0.518  | 0.341  | 0.245 | 0.238 | 0.286  | 0.38  |
| 0.562  | 0.364  | 0.264 | 0.249 | 0.243  | 0.322 |
| 0.625  | 0.368  | 0.251 | 0.254 | 0.283  | 0.336 |
| 1.02   | 0.768  | 0.582 | 0.606 | 0.65   | 0.823 |
| 1.018  | 0.751  | 0.582 | 0.622 | 0.665  | 0.77  |
| 1.011  | 0.797  | 0.589 | 0.606 | 0.576  | 0.673 |
| 0.982  | 0.788  | 0.607 | 0.705 | 0.669  | 0.716 |
| 0.439  | 0.3973 | 0.388 | 0.297 | 0.316  | 0.332 |
| 0.422  | 0.413  | 0.416 | 0.295 | 0.317  | 0.352 |
| 0.254  | 0.358  | 0.372 | 0.296 | 0.293  | 0.298 |
| 0.368  | 0.421  | 0.421 | 0.258 | 0.311  | 0.322 |
| 0.476  | 0.52   | 0.505 | 0.486 | 0.514  | 0.521 |
| 0.468  | 0.534  | 0.505 | 0.484 | 0.509  | 0.498 |
| 0.499  | 0.492  | 0.48  | 0.489 | 0.481  | 0.512 |
| 0.457  | 0.519  | 0.469 | 0.498 | 0.518  | 0.51  |
| 0.628  | 0.63   | 0.592 | 0.593 | 0.616  | 0.615 |
| 0.616  | 0.629  | 0.613 | 0.61  | 0.639  | 0.608 |
| 0.632  | 0.6    | 0.581 | 0.581 | 0.542  | 0.566 |
| 0.621  | 0.617  | 0.591 | 0.594 | 0.565  | 0.565 |
| 0.964  | 0.973  | 0.803 | 0.834 | 0.782  | 0.755 |
| 0.836  | 1.012  | 0.777 | 0.848 | 0.827  | 0.747 |
| 1.021  | 0.892  | 0.758 | 0.76  | 0.719  | 0.688 |
| 0.904  | 0.945  | 0.735 | 0.791 | 0.709  | 0.674 |

|       |       |       |       |       |       |
|-------|-------|-------|-------|-------|-------|
| 0.733 | 0.659 | 0.649 | 0.631 | 0.645 | 0.625 |
| 0.732 | 0.682 | 0.614 | 0.628 | 0.639 | 0.638 |
| 0.782 | 0.686 | 0.652 | 0.624 | 0.637 | 0.624 |
| 0.736 | 0.664 | 0.628 | 0.637 | 0.627 | 0.628 |
| 0.073 | 0.092 | 0.08  | 0.098 | 0.145 | 0.264 |
| 0.069 | 0.103 | 0.077 | 0.104 | 0.131 | 0.237 |
| 0.094 | 0.099 | 0.094 | 0.126 | 0.128 | 0.256 |
| 0.088 | 0.124 | 0.096 | 0.136 | 0.154 | 0.241 |

|        |       |       |       |       |       |
|--------|-------|-------|-------|-------|-------|
| 0.3055 | 0.29  | 0.291 | 0.301 | 0.292 | 0.315 |
| 0.307  | 0.283 | 0.298 | 0.306 | 0.276 | 0.307 |
| 0.3055 | 0.294 | 0.295 | 0.31  | 0.299 | 0.315 |
| 0.304  | 0.296 | 0.291 | 0.305 | 0.286 | 0.306 |

|       |       |       |       |       |       |
|-------|-------|-------|-------|-------|-------|
| 0.543 | 0.532 | 0.468 | 0.47  | 0.502 | 0.475 |
| 0.538 | 0.509 | 0.5   | 0.466 | 0.427 | 0.473 |
| 0.544 | 0.479 | 0.474 | 0.477 | 0.469 | 0.453 |
| 0.548 | 0.486 | 0.473 | 0.48  | 0.441 | 0.457 |

|       |       |       |        |       |       |
|-------|-------|-------|--------|-------|-------|
| 0.404 | 0.399 | 0.408 | 0.418  | 0.405 | 0.404 |
| 0.425 | 0.408 | 0.4   | 0.418  | 0.373 | 0.404 |
| 0.385 | 0.4   | 0.404 | 0.402  | 0.365 | 0.393 |
| 0.402 | 0.405 | 0.404 | 0.4127 | 0.357 | 0.388 |

|       |       |       |       |       |       |
|-------|-------|-------|-------|-------|-------|
| 0.679 | 0.67  | 0.612 | 0.695 | 0.716 | 0.699 |
| 0.664 | 0.702 | 0.722 | 0.688 | 0.619 | 0.679 |
| 0.662 | 0.669 | 0.692 | 0.673 | 0.648 | 0.656 |
| 0.643 | 0.663 | 0.653 | 0.641 | 0.664 | 0.676 |

|       |       |       |       |       |       |
|-------|-------|-------|-------|-------|-------|
| 0.708 | 0.775 | 0.756 | 0.819 | 0.745 | 0.803 |
| 0.626 | 0.842 | 0.849 | 0.818 | 0.617 | 0.641 |
| 0.602 | 0.759 | 0.685 | 0.686 | 0.48  | 0.568 |
| 0.549 | 0.684 | 0.625 | 0.69  | 0.497 | 0.549 |

|       |       |       |       |       |       |
|-------|-------|-------|-------|-------|-------|
| 0.308 | 0.24  | 0.253 | 0.272 | 0.281 | 0.267 |
| 0.31  | 0.294 | 0.282 | 0.261 | 0.27  | 0.295 |
| 0.278 | 0.332 | 0.335 | 0.315 | 0.276 | 0.31  |
| 0.371 | 0.372 | 0.313 | 0.336 | 0.306 | 0.314 |

|       |       |       |       |       |       |
|-------|-------|-------|-------|-------|-------|
| 0.517 | 0.681 | 0.97  | 1.054 | 0.939 | 0.913 |
| 0.512 | 0.775 | 1.033 | 0.954 | 0.788 | 0.855 |
| 0.504 | 0.767 | 0.96  | 0.902 | 0.694 | 0.717 |
| 0.546 | 0.758 | 0.929 | 0.956 | 0.759 | 0.732 |

|       |        |       |       |        |       |
|-------|--------|-------|-------|--------|-------|
| 0.279 | 0.446  | 0.84  | 1.036 | 1.084  | 1.014 |
| 0.254 | 0.482  | 0.897 | 1.036 | 0.91   | 1.022 |
| 0.224 | 0.417  | 0.716 | 0.849 | 0.794  | 0.856 |
| 0.302 | 0.422  | 0.702 | 0.865 | 0.815  | 0.815 |
| 1.055 | 0.934  | 0.709 | 0.707 | 0.7    | 0.756 |
| 1.072 | 0.865  | 0.737 | 0.707 | 0.6833 | 0.709 |
| 1.045 | 0.843  | 0.754 | 0.705 | 0.665  | 0.728 |
| 1.031 | 0.834  | 0.706 | 0.697 | 0.685  | 0.77  |
| 0.714 | 0.713  | 0.699 | 0.703 | 0.656  | 0.669 |
| 0.723 | 0.707  | 0.72  | 0.696 | 0.625  | 0.693 |
| 0.697 | 0.7073 | 0.726 | 0.702 | 0.656  | 0.7   |
| 0.704 | 0.702  | 0.734 | 0.708 | 0.664  | 0.713 |
| 0.719 | 0.6957 | 0.644 | 0.804 | 0.842  | 0.889 |
| 0.664 | 0.714  | 0.81  | 0.777 | 0.594  | 0.751 |
| 0.675 | 0.691  | 0.724 | 0.73  | 0.648  | 0.762 |
| 0.642 | 0.682  | 0.723 | 0.744 | 0.683  | 0.749 |
| 0.596 | 0.633  | 0.711 | 0.635 | 0.561  | 0.524 |
| 0.506 | 0.563  | 0.586 | 0.648 | 0.55   | 0.572 |
| 0.608 | 0.537  | 0.569 | 0.523 | 0.563  | 0.486 |
| 0.541 | 0.507  | 0.53  | 0.498 | 0.539  | 0.483 |
| 0.783 | 0.746  | 0.725 | 0.75  | 0.689  | 0.75  |
| 0.793 | 0.756  | 0.725 | 0.734 | 0.654  | 0.738 |
| 0.762 | 0.735  | 0.709 | 0.709 | 0.632  | 0.72  |
| 0.762 | 0.721  | 0.696 | 0.7   | 0.635  | 0.728 |
| 0.252 | 0.27   | 0.276 | 0.28  | 0.287  | 0.299 |
| 0.235 | 0.252  | 0.296 | 0.279 | 0.247  | 0.274 |
| 0.215 | 0.242  | 0.268 | 0.26  | 0.232  | 0.255 |
| 0.225 | 0.241  | 0.262 | 0.26  | 0.239  | 0.26  |
| 0.706 | 0.442  | 0.245 | 0.271 | 0.32   | 0.365 |
| 0.643 | 0.396  | 0.287 | 0.292 | 0.251  | 0.281 |
| 0.46  | 0.37   | 0.278 | 0.253 | 0.244  | 0.307 |
| 0.413 | 0.366  | 0.266 | 0.255 | 0.256  | 0.327 |
| 0.992 | 0.822  | 0.612 | 0.623 | 0.668  | 0.677 |
| 0.894 | 0.825  | 0.668 | 0.66  | 0.608  | 0.659 |
| 0.794 | 0.712  | 0.604 | 0.562 | 0.507  | 0.586 |
| 1.003 | 0.713  | 0.568 | 0.549 | 0.489  | 0.6   |
| 0.581 | 0.165  | 0.388 | 0.33  | 0.374  | 0.364 |
| 0.386 | 0.412  | 0.331 | 0.364 | 0.444  | 0.4   |
| 0.244 | 0.513  | 0.509 | 0.384 | 0.323  | 0.262 |
| 0.619 | 0.631  | 0.495 | 0.294 | 0.302  | 0.263 |

|       |       |       |        |        |       |
|-------|-------|-------|--------|--------|-------|
| 0.481 | 0.483 | 0.503 | 0.516  | 0.512  | 0.505 |
| 0.486 | 0.479 | 0.508 | 0.514  | 0.486  | 0.508 |
| 0.469 | 0.466 | 0.479 | 0.473  | 0.447  | 0.455 |
| 0.488 | 0.458 | 0.467 | 0.471  | 0.449  | 0.461 |
| 0.6   | 0.659 | 0.574 | 0.593  | 0.573  | 0.561 |
| 0.585 | 0.614 | 0.586 | 0.597  | 0.546  | 0.574 |
| 0.622 | 0.593 | 0.583 | 0.574  | 0.572  | 0.553 |
| 0.567 | 0.59  | 0.561 | 0.581  | 0.568  | 0.573 |
| 0.892 | 0.871 | 0.68  | 0.65   | 0.658  | 0.709 |
| 0.928 | 0.858 | 0.786 | 0.66   | 0.6797 | 0.704 |
| 0.728 | 0.819 | 0.786 | 0.701  | 0.693  | 0.792 |
| 0.825 | 0.835 | 0.778 | 0.723  | 0.688  | 0.812 |
| 0.762 | 0.659 | 0.653 | 0.66   | 0.646  | 0.641 |
| 0.767 | 0.71  | 0.655 | 0.653  | 0.631  | 0.64  |
| 0.708 | 0.706 | 0.672 | 0.664  | 0.615  | 0.635 |
| 0.725 | 0.71  | 0.65  | 0.661  | 0.643  | 0.654 |
| 0.086 | 0.093 | 0.111 | 0.108  | 0.109  | 0.173 |
| 0.068 | 0.091 | 0.121 | 0.106  | 0.078  | 0.143 |
| 0.075 | 0.063 | 0.087 | 0.084  | 0.064  | 0.123 |
| 0.071 | 0.064 | 0.084 | 0.084  | 0.063  | 0.12  |
| 0.323 | 0.316 | 0.325 | 0.298  | 0.324  | 0.311 |
| 0.315 | 0.304 | 0.317 | 0.308  | 0.291  | 0.304 |
| 0.321 | 0.326 | 0.318 | 0.328  | 0.314  | 0.328 |
| 0.33  | 0.304 | 0.308 | 0.322  | 0.323  | 0.327 |
| 0.564 | 0.531 | 0.497 | 0.483  | 0.494  | 0.483 |
| 0.59  | 0.534 | 0.5   | 0.479  | 0.465  | 0.478 |
| 0.546 | 0.582 | 0.543 | 0.508  | 0.497  | 0.503 |
| 0.571 | 0.555 | 0.525 | 0.51   | 0.512  | 0.517 |
| 0.415 | 0.413 | 0.413 | 0.424  | 0.419  | 0.424 |
| 0.384 | 0.409 | 0.41  | 0.415  | 0.402  | 0.415 |
| 0.422 | 0.38  | 0.381 | 0.4067 | 0.386  | 0.398 |
| 0.39  | 0.374 | 0.372 | 0.381  | 0.381  | 0.4   |
| 0.74  | 0.698 | 0.674 | 0.708  | 0.678  | 0.681 |
| 0.688 | 0.683 | 0.685 | 0.719  | 0.646  | 0.658 |
| 0.723 | 0.644 | 0.632 | 0.674  | 0.636  | 0.646 |
| 0.691 | 0.64  | 0.622 | 0.652  | 0.625  | 0.657 |

|       |        |       |       |       |        |
|-------|--------|-------|-------|-------|--------|
| 0.813 | 0.901  | 0.918 | 0.9   | 0.845 | 0.846  |
| 0.672 | 0.888  | 0.893 | 0.863 | 0.688 | 0.733  |
| 0.751 | 0.749  | 0.733 | 0.764 | 0.656 | 0.666  |
| 0.669 | 0.694  | 0.724 | 0.718 | 0.663 | 0.667  |
| 0.25  | 0.269  | 0.311 | 0.338 | 0.292 | 0.3117 |
| 0.287 | 0.2947 | 0.284 | 0.303 | 0.288 | 0.321  |
| 0.216 | 0.328  | 0.348 | 0.238 | 0.3   | 0.295  |
| 0.302 | 0.287  | 0.322 | 0.371 | 0.322 | 0.319  |
| 0.355 | 0.646  | 0.934 | 0.943 | 0.869 | 0.852  |
| 0.281 | 0.717  | 0.885 | 0.85  | 0.703 | 0.766  |
| 0.367 | 0.573  | 0.746 | 0.769 | 0.613 | 0.693  |
| 0.316 | 0.551  | 0.691 | 0.787 | 0.665 | 0.711  |
| 0.189 | 0.308  | 0.656 | 0.794 | 0.853 | 0.894  |
| 0.173 | 0.353  | 0.663 | 0.759 | 0.729 | 0.889  |
| 0.291 | 0.342  | 0.633 | 0.797 | 0.634 | 0.801  |
| 0.284 | 0.332  | 0.615 | 0.707 | 0.693 | 0.791  |
| 0.835 | 0.696  | 0.61  | 0.607 | 0.609 | 0.643  |
| 0.858 | 0.673  | 0.596 | 0.572 | 0.553 | 0.58   |
| 0.686 | 0.79   | 0.709 | 0.677 | 0.66  | 0.673  |
| 0.86  | 0.745  | 0.685 | 0.662 | 0.661 | 0.684  |
| 0.676 | 0.677  | 0.69  | 0.681 | 0.684 | 0.66   |
| 0.696 | 0.671  | 0.682 | 0.678 | 0.661 | 0.641  |
| 0.663 | 0.701  | 0.722 | 0.698 | 0.685 | 0.68   |
| 0.697 | 0.705  | 0.704 | 0.692 | 0.697 | 0.678  |
| 0.785 | 0.818  | 0.837 | 0.889 | 0.855 | 0.907  |
| 0.723 | 0.808  | 0.848 | 0.858 | 0.754 | 0.834  |
| 0.717 | 0.751  | 0.798 | 0.823 | 0.751 | 0.821  |
| 0.726 | 0.751  | 0.8   | 0.815 | 0.769 | 0.808  |
| 0.726 | 0.692  | 0.685 | 0.739 | 0.646 | 0.708  |
| 0.739 | 0.678  | 0.697 | 0.718 | 0.599 | 0.735  |
| 0.731 | 0.689  | 0.693 | 0.635 | 0.662 | 0.662  |
| 0.745 | 0.666  | 0.675 | 0.74  | 0.672 | 0.658  |
| 0.657 | 0.658  | 0.641 | 0.626 | 0.684 | 0.687  |
| 0.589 | 0.656  | 0.665 | 0.64  | 0.612 | 0.637  |
| 0.637 | 0.573  | 0.572 | 0.588 | 0.563 | 0.589  |
| 0.579 | 0.579  | 0.513 | 0.566 | 0.577 | 0.599  |
| 0.25  | 0.239  | 0.257 | 0.266 | 0.273 | 0.314  |
| 0.216 | 0.237  | 0.259 | 0.267 | 0.251 | 0.295  |
| 0.225 | 0.231  | 0.244 | 0.261 | 0.251 | 0.26   |

|       |       |       |       |       |        |
|-------|-------|-------|-------|-------|--------|
| 0.222 | 0.228 | 0.238 | 0.241 | 0.254 | 0.258  |
| 0.804 | 0.47  | 0.307 | 0.291 | 0.314 | 0.392  |
| 0.666 | 0.415 | 0.301 | 0.289 | 0.283 | 0.358  |
| 0.668 | 0.404 | 0.282 | 0.27  | 0.27  | 0.353  |
| 0.623 | 0.374 | 0.278 | 0.262 | 0.279 | 0.35   |
| 0.918 | 0.93  | 0.705 | 0.691 | 0.716 | 0.759  |
| 0.967 | 0.85  | 0.681 | 0.678 | 0.669 | 0.733  |
| 1.049 | 0.813 | 0.632 | 0.604 | 0.613 | 0.692  |
| 0.926 | 0.75  | 0.615 | 0.588 | 0.609 | 0.694  |
| 0.489 | 0.365 | 0.511 | 0.384 | 0.36  | 0.321  |
| 0.564 | 0.592 | 0.488 | 0.385 | 0.39  | 0.293  |
| 0.243 | 0.429 | 0.503 | 0.396 | 0.333 | 0.321  |
| 0.403 | 0.666 | 0.544 | 0.366 | 0.329 | 0.339  |
| 0.489 | 0.477 | 0.504 | 0.502 | 0.512 | 0.518  |
| 0.506 | 0.483 | 0.512 | 0.496 | 0.486 | 0.497  |
| 0.483 | 0.505 | 0.539 | 0.531 | 0.503 | 0.522  |
| 0.523 | 0.518 | 0.526 | 0.527 | 0.522 | 0.529  |
| 0.616 | 0.546 | 0.588 | 0.558 | 0.585 | 0.549  |
| 0.647 | 0.58  | 0.581 | 0.576 | 0.587 | 0.553  |
| 0.609 | 0.587 | 0.614 | 0.602 | 0.618 | 0.581  |
| 0.671 | 0.597 | 0.608 | 0.611 | 0.608 | 0.583  |
| 0.923 | 0.921 | 0.794 | 0.659 | 0.735 | 0.784  |
| 0.868 | 0.858 | 0.818 | 0.694 | 0.667 | 0.735  |
| 0.824 | 0.888 | 0.842 | 0.71  | 0.754 | 0.8    |
| 0.894 | 0.905 | 0.823 | 0.726 | 0.772 | 0.769  |
| 0.771 | 0.697 | 0.656 | 0.661 | 0.644 | 0.639  |
| 0.7   | 0.677 | 0.636 | 0.649 | 0.59  | 0.623  |
| 0.729 | 0.64  | 0.604 | 0.615 | 0.614 | 0.609  |
| 0.701 | 0.62  | 0.609 | 0.61  | 0.625 | 0.609  |
| 0.071 | 0.09  | 0.083 | 0.082 | 0.09  | 0.11   |
| 0.052 | 0.077 | 0.081 | 0.075 | 0.052 | 0.076  |
| 0.061 | 0.062 | 0.051 | 0.045 | 0.038 | 0.0823 |
| 0.059 | 0.059 | 0.041 | 0.04  | 0.05  | 0.061  |
| 0.319 | 0.325 | 0.303 | 0.304 | 0.305 | 0.31   |
| 0.331 | 0.333 | 0.309 | 0.322 | 0.317 | 0.336  |
| 0.336 | 0.334 | 0.317 | 0.321 | 0.311 | 0.33   |

|       |       |       |       |       |        |
|-------|-------|-------|-------|-------|--------|
| 0.329 | 0.319 | 0.301 | 0.305 | 0.292 | 0.302  |
| 0.571 | 0.572 | 0.537 | 0.496 | 0.526 | 0.518  |
| 0.613 | 0.609 | 0.545 | 0.531 | 0.561 | 0.571  |
| 0.592 | 0.607 | 0.565 | 0.546 | 0.565 | 0.557  |
| 0.592 | 0.588 | 0.541 | 0.529 | 0.525 | 0.522  |
| 0.417 | 0.412 | 0.418 | 0.379 | 0.395 | 0.423  |
| 0.456 | 0.415 | 0.42  | 0.408 | 0.424 | 0.442  |
| 0.443 | 0.441 | 0.444 | 0.402 | 0.427 | 0.443  |
| 0.463 | 0.434 | 0.453 | 0.43  | 0.446 | 0.443  |
| 0.689 | 0.692 | 0.711 | 0.683 | 0.634 | 0.703  |
| 0.742 | 0.653 | 0.695 | 0.716 | 0.662 | 0.72   |
| 0.691 | 0.672 | 0.731 | 0.678 | 0.695 | 0.697  |
| 0.735 | 0.669 | 0.714 | 0.717 | 0.674 | 0.675  |
| 0.679 | 0.705 | 0.698 | 0.665 | 0.559 | 0.557  |
| 0.63  | 0.635 | 0.719 | 0.656 | 0.541 | 0.542  |
| 0.671 | 0.663 | 0.759 | 0.703 | 0.612 | 0.691  |
| 0.744 | 0.736 | 0.77  | 0.758 | 0.672 | 0.618  |
| 0.455 | 0.449 | 0.44  | 0.427 | 0.414 | 0.427  |
| 0.49  | 0.458 | 0.452 | 0.455 | 0.439 | 0.447  |
| 0.668 | 0.665 | 0.587 | 0.592 | 0.637 | 0.61   |
| 0.604 | 0.494 | 0.596 | 0.558 | 0.517 | 0.476  |
| 0.294 | 0.535 | 0.698 | 0.71  | 0.674 | 0.653  |
| 0.288 | 0.496 | 0.691 | 0.694 | 0.673 | 0.694  |
| 0.332 | 0.608 | 0.864 | 0.819 | 0.825 | 0.767  |
| 0.31  | 0.507 | 0.763 | 0.738 | 0.698 | 0.698  |
| 0.097 | 0.268 | 0.554 | 0.642 | 0.664 | 0.711  |
| 0.128 | 0.249 | 0.524 | 0.641 | 0.662 | 0.7077 |
| 0.111 | 0.262 | 0.601 | 0.632 | 0.7   | 0.717  |
| 0.131 | 0.23  | 0.55  | 0.618 | 0.641 | 0.695  |
| 0.888 | 0.828 | 0.699 | 0.73  | 0.683 | 0.725  |
| 0.933 | 0.752 | 0.726 | 0.755 | 0.707 | 0.756  |
| 1.003 | 0.884 | 0.729 | 0.81  | 0.757 | 0.787  |
| 0.899 | 0.773 | 0.67  | 0.725 | 0.643 | 0.68   |
| 0.723 | 0.736 | 0.718 | 0.747 | 0.756 | 0.741  |
| 0.758 | 0.724 | 0.723 | 0.773 | 0.767 | 0.809  |
| 0.754 | 0.73  | 0.716 | 0.78  | 0.804 | 0.747  |
| 0.702 | 0.706 | 0.679 | 0.715 | 0.713 | 0.718  |
| 0.739 | 0.728 | 0.735 | 0.726 | 0.724 | 0.713  |
| 0.762 | 0.653 | 0.722 | 0.741 | 0.751 | 0.75   |

|       |       |       |        |       |       |
|-------|-------|-------|--------|-------|-------|
| 0.683 | 0.691 | 0.723 | 0.677  | 0.657 | 0.688 |
| 0.698 | 0.697 | 0.702 | 0.701  | 0.677 | 0.693 |
| 0.543 | 0.503 | 0.484 | 0.478  | 0.469 | 0.52  |
| 0.571 | 0.49  | 0.497 | 0.482  | 0.505 | 0.548 |
| 0.538 | 0.524 | 0.486 | 0.479  | 0.497 | 0.533 |
| 0.563 | 0.505 | 0.477 | 0.475  | 0.476 | 0.538 |
| 0.777 | 0.775 | 0.718 | 0.761  | 0.693 | 0.747 |
| 0.827 | 0.757 | 0.738 | 0.793  | 0.728 | 0.771 |
| 0.773 | 0.765 | 0.743 | 0.804  | 0.736 | 0.789 |
| 0.85  | 0.752 | 0.744 | 0.817  | 0.775 | 0.814 |
| 0.196 | 0.229 | 0.245 | 0.239  | 0.251 | 0.25  |
| 0.208 | 0.215 | 0.243 | 0.242  | 0.269 | 0.258 |
| 0.207 | 0.229 | 0.25  | 0.245  | 0.263 | 0.251 |
| 0.223 | 0.236 | 0.26  | 0.261  | 0.282 | 0.251 |
| 0.955 | 0.472 | 0.348 | 0.3493 | 0.341 | 0.286 |
| 0.943 | 0.421 | 0.365 | 0.337  | 0.29  | 0.306 |
| 1.012 | 0.481 | 0.37  | 0.346  | 0.362 | 0.408 |
| 0.965 | 0.575 | 0.367 | 0.365  | 0.385 | 0.424 |
| 1.081 | 0.794 | 0.79  | 0.769  | 0.781 | 0.614 |
| 1.097 | 0.914 | 0.792 | 0.775  | 0.668 | 0.677 |
| 1.101 | 0.803 | 0.789 | 0.762  | 0.799 | 0.629 |
| 1.11  | 0.779 | 0.78  | 0.7687 | 0.804 | 0.631 |
| 0.585 | 0.651 | 0.451 | 0.337  | 0.328 | 0.304 |
| 0.626 | 0.681 | 0.456 | 0.373  | 0.341 | 0.323 |
| 0.768 | 0.744 | 0.323 | 0.422  | 0.4   | 0.369 |
| 0.453 | 0.416 | 0.395 | 0.301  | 0.395 | 0.349 |
| 0.487 | 0.528 | 0.553 | 0.503  | 0.511 | 0.529 |
| 0.527 | 0.503 | 0.522 | 0.541  | 0.559 | 0.581 |
| 0.494 | 0.52  | 0.543 | 0.515  | 0.513 | 0.5   |
| 0.477 | 0.52  | 0.519 | 0.525  | 0.515 | 0.514 |
| 0.586 | 0.594 | 0.596 | 0.633  | 0.559 | 0.598 |
| 0.64  | 0.603 | 0.612 | 0.698  | 0.589 | 0.636 |
| 0.619 | 0.638 | 0.671 | 0.663  | 0.593 | 0.636 |
| 0.653 | 0.614 | 0.621 | 0.652  | 0.587 | 0.618 |
| 0.86  | 0.916 | 1.007 | 0.94   | 1.036 | 0.971 |
| 0.973 | 1.063 | 1.056 | 0.963  | 0.916 | 0.889 |
| 1.105 | 1.096 | 1.072 | 0.971  | 1.032 | 0.996 |
| 1.003 | 0.993 | 0.961 | 0.92   | 0.969 | 0.955 |
| 0.848 | 0.766 | 0.699 | 0.763  | 0.721 | 0.703 |

|       |       |       |       |       |       |
|-------|-------|-------|-------|-------|-------|
| 0.882 | 0.757 | 0.728 | 0.785 | 0.723 | 0.717 |
| 0.953 | 0.853 | 0.76  | 0.835 | 0.793 | 0.774 |
| 0.939 | 0.778 | 0.779 | 0.817 | 0.793 | 0.742 |
| 0.085 | 0.108 | 0.115 | 0.118 | 0.138 | 0.237 |
| 0.1   | 0.096 | 0.116 | 0.11  | 0.163 | 0.28  |
| 0.08  | 0.099 | 0.099 | 0.093 | 0.121 | 0.189 |
| 0.094 | 0.082 | 0.094 | 0.106 | 0.118 | 0.179 |

|       |        |       |       |       |       |
|-------|--------|-------|-------|-------|-------|
| 0.275 | 0.274  | 0.274 | 0.287 | 0.279 | 0.259 |
| 0.277 | 0.279  | 0.287 | 0.293 | 0.286 | 0.276 |
| 0.287 | 0.268  | 0.276 | 0.285 | 0.293 | 0.291 |
| 0.291 | 0.2737 | 0.264 | 0.309 | 0.256 | 0.293 |

|       |       |       |       |       |       |
|-------|-------|-------|-------|-------|-------|
| 0.465 | 0.445 | 0.421 | 0.431 | 0.436 | 0.396 |
| 0.493 | 0.458 | 0.432 | 0.44  | 0.441 | 0.433 |
| 0.482 | 0.449 | 0.457 | 0.451 | 0.478 | 0.445 |
| 0.544 | 0.403 | 0.452 | 0.46  | 0.414 | 0.461 |

|       |        |       |        |       |       |
|-------|--------|-------|--------|-------|-------|
| 0.355 | 0.334  | 0.344 | 0.367  | 0.367 | 0.367 |
| 0.366 | 0.35   | 0.369 | 0.376  | 0.367 | 0.365 |
| 0.368 | 0.365  | 0.367 | 0.375  | 0.385 | 0.366 |
| 0.375 | 0.3497 | 0.367 | 0.3727 | 0.373 | 0.37  |

|       |       |       |       |        |       |
|-------|-------|-------|-------|--------|-------|
| 0.579 | 0.583 | 0.634 | 0.68  | 0.639  | 0.657 |
| 0.61  | 0.614 | 0.672 | 0.675 | 0.65   | 0.64  |
| 0.653 | 0.636 | 0.639 | 0.658 | 0.678  | 0.647 |
| 0.677 | 0.611 | 0.611 | 0.671 | 0.6557 | 0.684 |

|       |       |       |       |       |       |
|-------|-------|-------|-------|-------|-------|
| 0.602 | 0.667 | 0.747 | 0.771 | 0.755 | 0.622 |
| 0.635 | 0.757 | 0.862 | 0.72  | 0.687 | 0.657 |
| 0.726 | 0.744 | 0.764 | 0.688 | 0.637 | 0.712 |
| 0.722 | 0.511 | 0.668 | 0.755 | 0.693 | 0.702 |

|       |        |       |       |       |       |
|-------|--------|-------|-------|-------|-------|
| 0.615 | 0.612  | 0.557 | 0.603 | 0.605 | 0.626 |
| 0.551 | 0.527  | 0.663 | 0.586 | 0.584 | 0.536 |
| 0.576 | 0.531  | 0.599 | 0.588 | 0.617 | 0.617 |
| 0.603 | 0.5567 | 0.544 | 0.654 | 0.575 | 0.597 |

|       |       |       |       |        |       |
|-------|-------|-------|-------|--------|-------|
| 0.402 | 0.691 | 0.867 | 0.809 | 0.745  | 0.767 |
| 0.463 | 0.704 | 0.96  | 0.775 | 0.715  | 0.758 |
| 0.571 | 0.688 | 0.832 | 0.774 | 0.675  | 0.869 |
| 0.569 | 0.45  | 0.78  | 0.84  | 0.7117 | 0.825 |

|      |       |       |       |       |       |
|------|-------|-------|-------|-------|-------|
| 0.32 | 0.493 | 0.732 | 0.779 | 0.802 | 0.791 |
|------|-------|-------|-------|-------|-------|

|       |        |       |       |        |        |
|-------|--------|-------|-------|--------|--------|
| 0.302 | 0.538  | 0.836 | 0.79  | 0.797  | 0.8067 |
| 0.436 | 0.469  | 0.731 | 0.744 | 0.737  | 0.805  |
| 0.369 | 0.392  | 0.72  | 0.802 | 0.7787 | 0.824  |
| 0.898 | 0.703  | 0.635 | 0.605 | 0.634  | 0.582  |
| 0.978 | 0.739  | 0.65  | 0.608 | 0.626  | 0.602  |
| 0.929 | 0.773  | 0.686 | 0.63  | 0.688  | 0.712  |
| 0.955 | 0.54   | 0.625 | 0.654 | 0.561  | 0.684  |
| 0.64  | 0.626  | 0.621 | 0.63  | 0.633  | 0.589  |
| 0.645 | 0.654  | 0.639 | 0.63  | 0.633  | 0.606  |
| 0.654 | 0.658  | 0.647 | 0.634 | 0.638  | 0.633  |
| 0.656 | 0.646  | 0.638 | 0.659 | 0.648  | 0.633  |
| 0.456 | 0.537  | 0.554 | 0.59  | 0.567  | 0.513  |
| 0.519 | 0.58   | 0.601 | 0.586 | 0.571  | 0.559  |
| 0.469 | 0.567  | 0.597 | 0.586 | 0.576  | 0.623  |
| 0.519 | 0.402  | 0.551 | 0.607 | 0.5713 | 0.631  |
| 0.522 | 0.503  | 0.55  | 0.497 | 0.535  | 0.494  |
| 0.576 | 0.593  | 0.533 | 0.491 | 0.497  | 0.567  |
| 0.519 | 0.515  | 0.563 | 0.536 | 0.552  | 0.532  |
| 0.557 | 0.537  | 0.533 | 0.583 | 0.408  | 0.591  |
| 0.614 | 0.597  | 0.621 | 0.636 | 0.631  | 0.598  |
| 0.679 | 0.651  | 0.674 | 0.644 | 0.647  | 0.656  |
| 0.675 | 0.632  | 0.662 | 0.646 | 0.658  | 0.675  |
| 0.679 | 0.6267 | 0.654 | 0.676 | 0.597  | 0.643  |
| 0.202 | 0.214  | 0.239 | 0.255 | 0.251  | 0.246  |
| 0.213 | 0.239  | 0.263 | 0.254 | 0.257  | 0.249  |
| 0.245 | 0.226  | 0.252 | 0.251 | 0.246  | 0.236  |
| 0.237 | 0.2263 | 0.238 | 0.267 | 0.224  | 0.253  |
| 0.464 | 0.234  | 0.213 | 0.2   | 0.227  | 0.207  |
| 0.43  | 0.266  | 0.241 | 0.209 | 0.236  | 0.251  |
| 0.444 | 0.27   | 0.234 | 0.2   | 0.234  | 0.278  |
| 0.467 | 0.157  | 0.212 | 0.219 | 0.19   | 0.29   |
| 0.903 | 0.543  | 0.441 | 0.461 | 0.496  | 0.431  |
| 1.009 | 0.6    | 0.502 | 0.474 | 0.497  | 0.497  |
| 0.814 | 0.611  | 0.476 | 0.452 | 0.491  | 0.533  |
| 0.824 | 0.435  | 0.45  | 0.494 | 0.409  | 0.553  |
| 0.749 | 0.415  | 0.346 | 0.291 | 0.295  | 0.313  |
| 0.612 | 0.605  | 0.351 | 0.317 | 0.286  | 0.279  |
| 0.379 | 0.36   | 0.372 | 0.347 | 0.292  | 0.313  |
| 0.272 | 0.78   | 0.257 | 0.279 | 0.291  | 0.3017 |

|       |       |       |        |       |       |
|-------|-------|-------|--------|-------|-------|
| 0.416 | 0.438 | 0.46  | 0.449  | 0.451 | 0.398 |
| 0.427 | 0.484 | 0.498 | 0.473  | 0.487 | 0.458 |
| 0.453 | 0.453 | 0.508 | 0.469  | 0.494 | 0.453 |
| 0.462 | 0.395 | 0.455 | 0.485  | 0.419 | 0.458 |
| 0.542 | 0.533 | 0.516 | 0.524  | 0.531 | 0.53  |
| 0.559 | 0.522 | 0.526 | 0.529  | 0.528 | 0.52  |
| 0.53  | 0.541 | 0.526 | 0.532  | 0.561 | 0.531 |
| 0.552 | 0.5   | 0.533 | 0.548  | 0.537 | 0.556 |
| 0.785 | 0.805 | 0.753 | 0.669  | 0.742 | 0.56  |
| 0.892 | 0.992 | 0.867 | 0.688  | 0.762 | 0.723 |
| 0.947 | 0.959 | 0.908 | 0.676  | 0.877 | 0.756 |
| 0.921 | 0.628 | 0.795 | 0.793  | 0.616 | 0.775 |
| 0.729 | 0.616 | 0.605 | 0.6    | 0.603 | 0.589 |
| 0.758 | 0.663 | 0.605 | 0.591  | 0.588 | 0.589 |
| 0.747 | 0.685 | 0.625 | 0.621  | 0.624 | 0.589 |
| 0.764 | 0.574 | 0.599 | 0.623  | 0.59  | 0.589 |
| 0.03  | 0.042 | 0.037 | 0.033  | 0.04  | 0.027 |
| 0.043 | 0.051 | 0.053 | 0.044  | 0.048 | 0.058 |
| 0.046 | 0.045 | 0.05  | 0.035  | 0.042 | 0.055 |
| 0.055 | 0.024 | 0.038 | 0.049  | 0.033 | 0.066 |
| 0.273 | 0.254 | 0.264 | 0.274  | 0.268 | 0.267 |
| 0.26  | 0.254 | 0.272 | 0.29   | 0.266 | 0.282 |
| 0.277 | 0.254 | 0.258 | 0.279  | 0.27  | 0.274 |
| 0.268 | 0.254 | 0.255 | 0.278  | 0.268 | 0.282 |
| 0.467 | 0.441 | 0.43  | 0.426  | 0.381 | 0.402 |
| 0.475 | 0.418 | 0.458 | 0.4237 | 0.412 | 0.425 |
| 0.487 | 0.415 | 0.424 | 0.423  | 0.412 | 0.409 |
| 0.469 | 0.366 | 0.421 | 0.422  | 0.405 | 0.418 |
| 0.375 | 0.36  | 0.359 | 0.355  | 0.335 | 0.354 |
| 0.381 | 0.342 | 0.372 | 0.38   | 0.357 | 0.374 |
| 0.384 | 0.38  | 0.385 | 0.392  | 0.397 | 0.394 |
| 0.4   | 0.34  | 0.378 | 0.395  | 0.397 | 0.408 |
| 0.653 | 0.656 | 0.588 | 0.583  | 0.612 | 0.617 |
| 0.648 | 0.643 | 0.588 | 0.633  | 0.647 | 0.651 |
| 0.649 | 0.706 | 0.606 | 0.643  | 0.69  | 0.687 |
| 0.674 | 0.637 | 0.618 | 0.651  | 0.714 | 0.684 |

|       |        |       |        |        |       |
|-------|--------|-------|--------|--------|-------|
| 0.73  | 0.811  | 0.731 | 0.807  | 0.662  | 0.641 |
| 0.724 | 0.729  | 0.739 | 0.859  | 0.744  | 0.667 |
| 0.769 | 0.774  | 0.734 | 0.84   | 0.731  | 0.796 |
| 0.795 | 0.693  | 0.738 | 0.905  | 0.728  | 0.795 |
| 0.606 | 0.567  | 0.507 | 0.635  | 0.63   | 0.609 |
| 0.638 | 0.569  | 0.568 | 0.592  | 0.6147 | 0.604 |
| 0.535 | 0.586  | 0.564 | 0.606  | 0.6    | 0.598 |
| 0.586 | 0.56   | 0.538 | 0.623  | 0.614  | 0.605 |
| 0.533 | 0.793  | 0.869 | 0.833  | 0.808  | 0.785 |
| 0.566 | 0.775  | 0.881 | 0.924  | 0.859  | 0.713 |
| 0.629 | 0.747  | 0.848 | 0.871  | 0.806  | 0.859 |
| 0.652 | 0.595  | 0.845 | 0.908  | 0.844  | 0.862 |
| 0.338 | 0.536  | 0.724 | 0.818  | 0.8    | 0.803 |
| 0.33  | 0.583  | 0.816 | 0.89   | 0.874  | 0.878 |
| 0.434 | 0.527  | 0.729 | 0.851  | 0.833  | 0.84  |
| 0.424 | 0.505  | 0.77  | 0.892  | 0.866  | 0.843 |
| 0.915 | 0.721  | 0.602 | 0.629  | 0.54   | 0.539 |
| 0.878 | 0.661  | 0.587 | 0.64   | 0.582  | 0.57  |
| 0.909 | 0.665  | 0.585 | 0.628  | 0.604  | 0.666 |
| 0.89  | 0.508  | 0.569 | 0.641  | 0.581  | 0.656 |
| 0.623 | 0.592  | 0.601 | 0.6    | 0.603  | 0.594 |
| 0.585 | 0.591  | 0.6   | 0.5977 | 0.612  | 0.611 |
| 0.627 | 0.585  | 0.601 | 0.593  | 0.603  | 0.599 |
| 0.597 | 0.5893 | 0.598 | 0.6    | 0.594  | 0.597 |
| 0.502 | 0.539  | 0.52  | 0.591  | 0.505  | 0.505 |
| 0.516 | 0.513  | 0.532 | 0.598  | 0.556  | 0.547 |
| 0.479 | 0.575  | 0.574 | 0.646  | 0.611  | 0.643 |
| 0.53  | 0.46   | 0.555 | 0.666  | 0.616  | 0.663 |
| 0.557 | 0.536  | 0.486 | 0.506  | 0.512  | 0.462 |
| 0.499 | 0.448  | 0.42  | 0.461  | 0.559  | 0.585 |
| 0.474 | 0.457  | 0.469 | 0.476  | 0.547  | 0.505 |
| 0.516 | 0.4803 | 0.471 | 0.541  | 0.539  | 0.52  |
| 0.699 | 0.636  | 0.585 | 0.606  | 0.589  | 0.578 |
| 0.697 | 0.626  | 0.651 | 0.647  | 0.637  | 0.607 |
| 0.736 | 0.684  | 0.644 | 0.675  | 0.681  | 0.673 |
| 0.72  | 0.598  | 0.641 | 0.694  | 0.713  | 0.674 |
| 0.211 | 0.215  | 0.225 | 0.226  | 0.202  | 0.219 |
| 0.214 | 0.212  | 0.237 | 0.246  | 0.235  | 0.241 |
| 0.216 | 0.225  | 0.234 | 0.254  | 0.251  | 0.262 |
| 0.223 | 0.2173 | 0.242 | 0.259  | 0.254  | 0.256 |

|       |        |        |       |       |       |
|-------|--------|--------|-------|-------|-------|
| 0.498 | 0.265  | 0.194  | 0.209 | 0.192 | 0.247 |
| 0.549 | 0.25   | 0.198  | 0.22  | 0.231 | 0.24  |
| 0.459 | 0.304  | 0.215  | 0.229 | 0.241 | 0.308 |
| 0.472 | 0.211  | 0.212  | 0.246 | 0.259 | 0.309 |
| 0.749 | 0.595  | 0.446  | 0.489 | 0.466 | 0.46  |
| 0.79  | 0.516  | 0.449  | 0.504 | 0.499 | 0.512 |
| 0.77  | 0.633  | 0.484  | 0.507 | 0.536 | 0.576 |
| 0.828 | 0.458  | 0.452  | 0.542 | 0.557 | 0.605 |
| 0.584 | 0.395  | 0.349  | 0.277 | 0.304 | 0.276 |
| 0.592 | 0.573  | 0.319  | 0.243 | 0.304 | 0.268 |
| 0.329 | 0.266  | 0.386  | 0.274 | 0.306 | 0.322 |
| 0.207 | 0.685  | 0.274  | 0.261 | 0.342 | 0.324 |
| 0.428 | 0.405  | 0.424  | 0.438 | 0.42  | 0.455 |
| 0.416 | 0.404  | 0.461  | 0.489 | 0.444 | 0.466 |
| 0.448 | 0.396  | 0.441  | 0.46  | 0.466 | 0.48  |
| 0.429 | 0.4017 | 0.433  | 0.451 | 0.449 | 0.48  |
| 0.53  | 0.514  | 0.513  | 0.521 | 0.513 | 0.519 |
| 0.523 | 0.512  | 0.521  | 0.537 | 0.52  | 0.509 |
| 0.533 | 0.499  | 0.496  | 0.509 | 0.526 | 0.512 |
| 0.532 | 0.496  | 0.504  | 0.504 | 0.514 | 0.513 |
| 1.027 | 0.853  | 0.723  | 0.624 | 0.591 | 0.668 |
| 0.937 | 0.802  | 0.798  | 0.733 | 0.689 | 0.755 |
| 0.997 | 0.863  | 0.781  | 0.684 | 0.75  | 0.794 |
| 0.943 | 0.656  | 0.761  | 0.731 | 0.787 | 0.795 |
| 0.711 | 0.624  | 0.571  | 0.588 | 0.545 | 0.573 |
| 0.694 | 0.595  | 0.567  | 0.593 | 0.56  | 0.591 |
| 0.721 | 0.623  | 0.593  | 0.615 | 0.595 | 0.63  |
| 0.737 | 0.548  | 0.592  | 0.624 | 0.589 | 0.621 |
| 0.048 | 0.041  | 0.037  | 0.045 | 0.036 | 0.05  |
| 0.043 | 0.038  | 0.04   | 0.048 | 0.041 | 0.058 |
| 0.049 | 0.044  | 0.047  | 0.052 | 0.05  | 0.077 |
| 0.054 | 0.029  | 0.043  | 0.062 | 0.054 | 0.082 |
| 0.259 | 0.236  | 0.2593 | 0.266 | 0.244 | 0.258 |
| 0.299 | 0.274  | 0.26   | 0.27  | 0.256 | 0.268 |
| 0.295 | 0.266  | 0.256  | 0.271 | 0.261 | 0.281 |
| 0.303 | 0.274  | 0.262  | 0.274 | 0.256 | 0.273 |

|       |       |       |       |        |       |
|-------|-------|-------|-------|--------|-------|
| 0.451 | 0.414 | 0.399 | 0.402 | 0.394  | 0.415 |
| 0.51  | 0.436 | 0.434 | 0.417 | 0.404  | 0.418 |
| 0.508 | 0.439 | 0.426 | 0.423 | 0.426  | 0.442 |
| 0.507 | 0.446 | 0.424 | 0.424 | 0.421  | 0.454 |
| 0.366 | 0.373 | 0.339 | 0.382 | 0.361  | 0.354 |
| 0.349 | 0.391 | 0.366 | 0.391 | 0.371  | 0.372 |
| 0.371 | 0.38  | 0.346 | 0.384 | 0.361  | 0.357 |
| 0.37  | 0.395 | 0.348 | 0.376 | 0.346  | 0.346 |
| 0.607 | 0.564 | 0.605 | 0.624 | 0.561  | 0.587 |
| 0.616 | 0.601 | 0.692 | 0.698 | 0.614  | 0.664 |
| 0.663 | 0.574 | 0.594 | 0.655 | 0.615  | 0.632 |
| 0.661 | 0.652 | 0.658 | 0.655 | 0.621  | 0.683 |
| 0.597 | 0.647 | 0.707 | 0.688 | 0.671  | 0.637 |
| 0.554 | 0.668 | 0.775 | 0.649 | 0.637  | 0.631 |
| 0.583 | 0.575 | 0.583 | 0.596 | 0.63   | 0.665 |
| 0.647 | 0.681 | 0.669 | 0.73  | 0.57   | 0.543 |
| 0.539 | 0.61  | 0.554 | 0.579 | 0.617  | 0.588 |
| 0.543 | 0.556 | 0.62  | 0.593 | 0.542  | 0.553 |
| 0.575 | 0.593 | 0.483 | 0.547 | 0.593  | 0.617 |
| 0.581 | 0.529 | 0.518 | 0.574 | 0.499  | 0.617 |
| 0.522 | 0.723 | 1.021 | 0.935 | 0.821  | 0.759 |
| 0.505 | 0.797 | 1.04  | 0.924 | 0.945  | 0.938 |
| 0.575 | 0.659 | 0.809 | 0.855 | 0.773  | 0.838 |
| 0.645 | 0.764 | 0.885 | 0.89  | 0.917  | 0.896 |
| 0.29  | 0.545 | 0.798 | 0.835 | 0.756  | 0.83  |
| 0.276 | 0.589 | 0.857 | 0.83  | 0.863  | 0.941 |
| 0.347 | 0.536 | 0.765 | 0.806 | 0.752  | 0.841 |
| 0.373 | 0.556 | 0.774 | 0.816 | 0.812  | 0.859 |
| 1.044 | 0.68  | 0.657 | 0.668 | 0.633  | 0.627 |
| 1.107 | 0.779 | 0.671 | 0.673 | 0.685  | 0.686 |
| 1.025 | 0.776 | 0.685 | 0.703 | 0.69   | 0.75  |
| 1.124 | 0.835 | 0.702 | 0.697 | 0.691  | 0.723 |
| 0.587 | 0.574 | 0.645 | 0.599 | 0.592  | 0.535 |
| 0.604 | 0.619 | 0.656 | 0.605 | 0.647  | 0.576 |
| 0.625 | 0.595 | 0.633 | 0.621 | 0.622  | 0.556 |
| 0.641 | 0.614 | 0.679 | 0.61  | 0.604  | 0.553 |
| 0.486 | 0.54  | 0.609 | 0.625 | 0.6347 | 0.614 |
| 0.566 | 0.647 | 0.661 | 0.619 | 0.644  | 0.635 |
| 0.554 | 0.601 | 0.634 | 0.611 | 0.613  | 0.609 |

|       |       |       |       |       |        |
|-------|-------|-------|-------|-------|--------|
| 0.59  | 0.639 | 0.668 | 0.641 | 0.647 | 0.598  |
| 0.48  | 0.42  | 0.463 | 0.467 | 0.401 | 0.457  |
| 0.575 | 0.484 | 0.528 | 0.482 | 0.475 | 0.553  |
| 0.563 | 0.485 | 0.51  | 0.496 | 0.5   | 0.555  |
| 0.587 | 0.522 | 0.545 | 0.542 | 0.499 | 0.56   |
| 0.761 | 0.708 | 0.769 | 0.789 | 0.727 | 0.75   |
| 0.785 | 0.83  | 0.848 | 0.807 | 0.812 | 0.827  |
| 0.846 | 0.769 | 0.778 | 0.763 | 0.747 | 0.76   |
| 0.853 | 0.811 | 0.794 | 0.796 | 0.812 | 0.733  |
| 0.199 | 0.206 | 0.236 | 0.266 | 0.222 | 0.244  |
| 0.211 | 0.254 | 0.267 | 0.283 | 0.256 | 0.27   |
| 0.231 | 0.221 | 0.227 | 0.255 | 0.231 | 0.235  |
| 0.228 | 0.239 | 0.241 | 0.262 | 0.231 | 0.229  |
| 0.787 | 0.337 | 0.267 | 0.286 | 0.269 | 0.328  |
| 0.843 | 0.363 | 0.326 | 0.326 | 0.346 | 0.424  |
| 0.971 | 0.384 | 0.287 | 0.282 | 0.295 | 0.373  |
| 0.965 | 0.329 | 0.286 | 0.299 | 0.314 | 0.364  |
| 1.142 | 0.608 | 0.549 | 0.617 | 0.59  | 0.579  |
| 0.95  | 0.747 | 0.644 | 0.658 | 0.697 | 0.663  |
| 1.054 | 0.637 | 0.554 | 0.565 | 0.607 | 0.642  |
| 1.048 | 0.701 | 0.568 | 0.62  | 0.63  | 0.639  |
| 0.764 | 0.406 | 0.414 | 0.348 | 0.405 | 0.3977 |
| 0.677 | 0.722 | 0.504 | 0.377 | 0.399 | 0.38   |
| 0.306 | 0.459 | 0.491 | 0.382 | 0.392 | 0.4    |
| 0.307 | 0.806 | 0.511 | 0.365 | 0.393 | 0.413  |
| 0.386 | 0.365 | 0.432 | 0.434 | 0.389 | 0.409  |
| 0.421 | 0.417 | 0.483 | 0.451 | 0.433 | 0.448  |
| 0.427 | 0.399 | 0.459 | 0.43  | 0.411 | 0.435  |
| 0.46  | 0.436 | 0.483 | 0.459 | 0.446 | 0.461  |
| 0.548 | 0.516 | 0.512 | 0.52  | 0.509 | 0.555  |
| 0.592 | 0.508 | 0.514 | 0.533 | 0.517 | 0.542  |
| 0.556 | 0.542 | 0.553 | 0.553 | 0.536 | 0.571  |
| 0.602 | 0.534 | 0.534 | 0.535 | 0.539 | 0.572  |
| 0.683 | 0.64  | 0.664 | 0.634 | 0.683 | 0.6603 |
| 0.79  | 0.75  | 0.718 | 0.671 | 0.668 | 0.663  |
| 0.784 | 0.724 | 0.761 | 0.687 | 0.707 | 0.673  |
| 0.867 | 0.819 | 0.762 | 0.662 | 0.674 | 0.645  |
| 0.796 | 0.691 | 0.685 | 0.677 | 0.642 | 0.628  |
| 0.775 | 0.723 | 0.68  | 0.671 | 0.655 | 0.663  |

|       |       |       |       |       |        |
|-------|-------|-------|-------|-------|--------|
| 0.8   | 0.697 | 0.64  | 0.628 | 0.613 | 0.653  |
| 0.797 | 0.701 | 0.645 | 0.647 | 0.632 | 0.635  |
| 0.05  | 0.048 | 0.062 | 0.067 | 0.059 | 0.096  |
| 0.063 | 0.097 | 0.1   | 0.094 | 0.106 | 0.1047 |
| 0.08  | 0.061 | 0.058 | 0.056 | 0.065 | 0.106  |
| 0.098 | 0.083 | 0.068 | 0.079 | 0.084 | 0.112  |
| 0.288 | 0.267 | 0.289 | 0.306 | 0.259 | 0.262  |
| 0.286 | 0.276 | 0.305 | 0.302 | 0.27  | 0.304  |
| 0.298 | 0.278 | 0.276 | 0.269 | 0.272 | 0.294  |
| 0.287 | 0.301 | 0.283 | 0.272 | 0.27  | 0.299  |
| 0.526 | 0.409 | 0.437 | 0.482 | 0.408 | 0.418  |
| 0.525 | 0.457 | 0.47  | 0.515 | 0.408 | 0.48   |
| 0.56  | 0.427 | 0.432 | 0.46  | 0.407 | 0.436  |
| 0.521 | 0.43  | 0.436 | 0.465 | 0.404 | 0.447  |
| 0.393 | 0.368 | 0.373 | 0.425 | 0.369 | 0.383  |
| 0.391 | 0.394 | 0.386 | 0.417 | 0.375 | 0.39   |
| 0.406 | 0.368 | 0.364 | 0.41  | 0.377 | 0.396  |
| 0.405 | 0.384 | 0.363 | 0.412 | 0.388 | 0.404  |
| 0.656 | 0.606 | 0.648 | 0.709 | 0.719 | 0.741  |
| 0.649 | 0.723 | 0.721 | 0.69  | 0.725 | 0.738  |
| 0.724 | 0.621 | 0.642 | 0.613 | 0.689 | 0.747  |
| 0.734 | 0.712 | 0.707 | 0.711 | 0.743 | 0.738  |
| 0.817 | 0.743 | 0.81  | 0.959 | 0.778 | 0.589  |
| 0.69  | 0.846 | 0.873 | 0.824 | 0.803 | 0.721  |
| 0.825 | 0.708 | 0.697 | 0.696 | 0.709 | 0.627  |
| 0.775 | 0.804 | 0.778 | 0.718 | 0.668 | 0.622  |
| 0.568 | 0.6   | 0.597 | 0.598 | 0.519 | 0.544  |
| 0.525 | 0.518 | 0.6   | 0.568 | 0.572 | 0.51   |
| 0.597 | 0.604 | 0.632 | 0.588 | 0.531 | 0.483  |
| 0.584 | 0.538 | 0.591 | 0.533 | 0.543 | 0.487  |
| 0.589 | 0.808 | 1.118 | 1.099 | 0.909 | 0.838  |
| 0.53  | 0.829 | 1.051 | 1.026 | 0.915 | 0.868  |
| 0.638 | 0.775 | 0.913 | 0.776 | 0.764 | 0.842  |
| 0.599 | 0.812 | 1.002 | 0.895 | 0.784 | 0.837  |
| 0.385 | 0.548 | 0.814 | 1.02  | 0.928 | 0.921  |
| 0.346 | 0.598 | 0.822 | 1.005 | 0.948 | 0.899  |

|       |        |       |        |       |        |
|-------|--------|-------|--------|-------|--------|
| 0.426 | 0.567  | 0.699 | 0.893  | 0.842 | 0.841  |
| 0.413 | 0.567  | 0.747 | 0.933  | 0.835 | 0.833  |
| 0.972 | 0.661  | 0.617 | 0.6253 | 0.625 | 0.634  |
| 0.959 | 0.736  | 0.628 | 0.642  | 0.633 | 0.625  |
| 0.99  | 0.69   | 0.618 | 0.613  | 0.628 | 0.639  |
| 0.987 | 0.726  | 0.623 | 0.621  | 0.631 | 0.638  |
| 0.62  | 0.64   | 0.678 | 0.734  | 0.618 | 0.618  |
| 0.608 | 0.647  | 0.711 | 0.717  | 0.661 | 0.701  |
| 0.614 | 0.649  | 0.663 | 0.7    | 0.645 | 0.686  |
| 0.592 | 0.684  | 0.699 | 0.708  | 0.655 | 0.685  |
| 0.629 | 0.583  | 0.642 | 0.757  | 0.596 | 0.623  |
| 0.602 | 0.657  | 0.712 | 0.724  | 0.629 | 0.745  |
| 0.603 | 0.598  | 0.63  | 0.648  | 0.604 | 0.683  |
| 0.627 | 0.672  | 0.691 | 0.697  | 0.584 | 0.681  |
| 0.567 | 0.471  | 0.468 | 0.518  | 0.555 | 0.451  |
| 0.475 | 0.543  | 0.53  | 0.528  | 0.479 | 0.54   |
| 0.585 | 0.494  | 0.531 | 0.496  | 0.522 | 0.533  |
| 0.445 | 0.447  | 0.534 | 0.535  | 0.51  | 0.522  |
| 0.729 | 0.6887 | 0.695 | 0.708  | 0.691 | 0.74   |
| 0.732 | 0.696  | 0.739 | 0.724  | 0.705 | 0.801  |
| 0.744 | 0.664  | 0.697 | 0.681  | 0.72  | 0.802  |
| 0.771 | 0.706  | 0.712 | 0.72   | 0.745 | 0.812  |
| 0.223 | 0.22   | 0.248 | 0.242  | 0.228 | 0.239  |
| 0.213 | 0.242  | 0.268 | 0.254  | 0.245 | 0.2437 |
| 0.23  | 0.224  | 0.238 | 0.244  | 0.221 | 0.244  |
| 0.221 | 0.239  | 0.246 | 0.236  | 0.243 | 0.248  |
| 0.523 | 0.266  | 0.231 | 0.258  | 0.216 | 0.249  |
| 0.46  | 0.333  | 0.245 | 0.26   | 0.248 | 0.331  |
| 0.552 | 0.283  | 0.212 | 0.214  | 0.23  | 0.292  |
| 0.505 | 0.327  | 0.23  | 0.239  | 0.239 | 0.296  |
| 1.003 | 0.59   | 0.522 | 0.547  | 0.526 | 0.501  |
| 0.921 | 0.642  | 0.546 | 0.575  | 0.577 | 0.579  |
| 0.815 | 0.582  | 0.474 | 0.462  | 0.518 | 0.542  |
| 0.799 | 0.641  | 0.502 | 0.502  | 0.545 | 0.539  |
| 0.485 | 0.396  | 0.37  | 0.292  | 0.34  | 0.287  |
| 0.515 | 0.607  | 0.37  | 0.304  | 0.317 | 0.252  |
| 0.32  | 0.412  | 0.346 | 0.289  | 0.302 | 0.304  |
| 0.275 | 0.61   | 0.394 | 0.283  | 0.326 | 0.289  |
| 0.437 | 0.415  | 0.453 | 0.474  | 0.476 | 0.447  |

|        |       |        |        |       |        |
|--------|-------|--------|--------|-------|--------|
| 0.444  | 0.479 | 0.462  | 0.473  | 0.473 | 0.483  |
| 0.483  | 0.434 | 0.415  | 0.414  | 0.436 | 0.452  |
| 0.453  | 0.456 | 0.452  | 0.4537 | 0.441 | 0.485  |
| 0.586  | 0.559 | 0.56   | 0.576  | 0.57  | 0.547  |
| 0.591  | 0.571 | 0.558  | 0.575  | 0.553 | 0.552  |
| 0.571  | 0.579 | 0.58   | 0.581  | 0.576 | 0.574  |
| 0.582  | 0.591 | 0.564  | 0.582  | 0.571 | 0.574  |
| 1.035  | 0.856 | 0.714  | 0.652  | 0.664 | 0.604  |
| 0.965  | 0.993 | 0.796  | 0.735  | 0.736 | 0.751  |
| 1.012  | 0.908 | 0.745  | 0.642  | 0.744 | 0.717  |
| 0.996  | 0.81  | 0.772  | 0.688  | 0.741 | 0.704  |
| 0.696  | 0.63  | 0.625  | 0.637  | 0.614 | 0.574  |
| 0.691  | 0.655 | 0.614  | 0.641  | 0.624 | 0.58   |
| 0.703  | 0.636 | 0.602  | 0.635  | 0.633 | 0.595  |
| 0.699  | 0.639 | 0.621  | 0.635  | 0.628 | 0.594  |
| 0.062  | 0.041 | 0.064  | 0.079  | 0.054 | 0.06   |
| 0.051  | 0.078 | 0.09   | 0.08   | 0.068 | 0.0677 |
| 0.074  | 0.053 | 0.054  | 0.045  | 0.051 | 0.069  |
| 0.071  | 0.075 | 0.071  | 0.061  | 0.057 | 0.074  |
| 0.299  | 0.297 | 0.286  | 0.282  | 0.282 | 0.294  |
| 0.353  | 0.304 | 0.28   | 0.2783 | 0.325 | 0.336  |
| 0.277  | 0.285 | 0.268  | 0.269  | 0.271 | 0.276  |
| 0.332  | 0.332 | 0.282  | 0.284  | 0.305 | 0.337  |
| 0.553  | 0.534 | 0.5203 | 0.491  | 0.474 | 0.495  |
| 0.563  | 0.559 | 0.546  | 0.558  | 0.529 | 0.5083 |
| 0.551  | 0.54  | 0.496  | 0.486  | 0.503 | 0.505  |
| 0.585  | 0.557 | 0.519  | 0.511  | 0.504 | 0.525  |
| 0.423  | 0.445 | 0.427  | 0.444  | 0.407 | 0.417  |
| 0.397  | 0.399 | 0.378  | 0.398  | 0.384 | 0.416  |
| 0.428  | 0.438 | 0.394  | 0.43   | 0.416 | 0.422  |
| 0.404  | 0.395 | 0.385  | 0.406  | 0.399 | 0.417  |
| 0.653  | 0.622 | 0.616  | 0.701  | 0.692 | 0.702  |
| 0.614  | 0.562 | 0.567  | 0.574  | 0.617 | 0.693  |
| 0.669  | 0.634 | 0.594  | 0.609  | 0.679 | 0.682  |
| 0.6453 | 0.674 | 0.666  | 0.667  | 0.769 | 0.743  |
| 0.812  | 0.914 | 0.868  | 0.815  | 0.708 | 0.667  |

|       |        |       |       |        |        |
|-------|--------|-------|-------|--------|--------|
| 0.659 | 0.723  | 0.698 | 0.682 | 0.63   | 0.586  |
| 0.871 | 0.922  | 0.807 | 0.754 | 0.825  | 0.769  |
| 0.895 | 0.71   | 0.831 | 0.819 | 0.817  | 0.755  |
| 0.643 | 0.666  | 0.64  | 0.702 | 0.603  | 0.617  |
| 0.557 | 0.548  | 0.714 | 0.586 | 0.526  | 0.594  |
| 0.63  | 0.587  | 0.565 | 0.558 | 0.575  | 0.544  |
| 0.635 | 0.6003 | 0.567 | 0.552 | 0.727  | 0.585  |
| 0.482 | 0.768  | 0.876 | 0.84  | 0.782  | 0.711  |
| 0.436 | 0.61   | 0.637 | 0.712 | 0.712  | 0.644  |
| 0.521 | 0.774  | 0.745 | 0.706 | 0.7407 | 0.731  |
| 0.481 | 0.656  | 0.805 | 0.703 | 0.728  | 0.661  |
| 0.25  | 0.452  | 0.65  | 0.715 | 0.686  | 0.711  |
| 0.249 | 0.384  | 0.535 | 0.657 | 0.61   | 0.662  |
| 0.224 | 0.392  | 0.542 | 0.581 | 0.628  | 0.657  |
| 0.199 | 0.282  | 0.536 | 0.481 | 0.44   | 0.483  |
| 0.914 | 0.764  | 0.645 | 0.672 | 0.603  | 0.673  |
| 0.999 | 0.791  | 0.624 | 0.749 | 0.683  | 0.756  |
| 0.835 | 0.706  | 0.563 | 0.604 | 0.595  | 0.641  |
| 0.831 | 0.795  | 0.587 | 0.645 | 0.593  | 0.697  |
| 0.735 | 0.783  | 0.683 | 0.755 | 0.668  | 0.765  |
| 0.732 | 0.764  | 0.701 | 0.833 | 0.717  | 0.816  |
| 0.723 | 0.725  | 0.623 | 0.736 | 0.674  | 0.723  |
| 0.738 | 0.728  | 0.647 | 0.781 | 0.667  | 0.718  |
| 0.652 | 0.646  | 0.671 | 0.655 | 0.623  | 0.676  |
| 0.6   | 0.577  | 0.641 | 0.602 | 0.572  | 0.625  |
| 0.682 | 0.727  | 0.66  | 0.651 | 0.711  | 0.853  |
| 0.853 | 0.832  | 0.793 | 0.86  | 0.84   | 0.902  |
| 0.473 | 0.396  | 0.459 | 0.402 | 0.465  | 0.479  |
| 0.574 | 0.513  | 0.499 | 0.605 | 0.549  | 0.583  |
| 0.422 | 0.492  | 0.423 | 0.456 | 0.463  | 0.472  |
| 0.542 | 0.611  | 0.492 | 0.558 | 0.561  | 0.644  |
| 0.796 | 0.847  | 0.77  | 0.87  | 0.808  | 0.812  |
| 0.716 | 0.695  | 0.695 | 0.77  | 0.772  | 0.811  |
| 0.795 | 0.795  | 0.747 | 0.857 | 0.853  | 0.864  |
| 0.888 | 0.784  | 0.775 | 0.891 | 0.821  | 0.847  |
| 0.227 | 0.246  | 0.237 | 0.261 | 0.24   | 0.256  |
| 0.213 | 0.213  | 0.214 | 0.229 | 0.221  | 0.26   |
| 0.207 | 0.218  | 0.218 | 0.226 | 0.232  | 0.238  |
| 0.183 | 0.243  | 0.214 | 0.206 | 0.205  | 0.2513 |

|       |        |        |        |        |        |
|-------|--------|--------|--------|--------|--------|
| 0.6   | 0.38   | 0.255  | 0.259  | 0.253  | 0.287  |
| 0.518 | 0.302  | 0.23   | 0.232  | 0.234  | 0.261  |
| 0.7   | 0.374  | 0.251  | 0.297  | 0.291  | 0.295  |
| 0.645 | 0.371  | 0.266  | 0.255  | 0.271  | 0.328  |
| 1.005 | 0.768  | 0.545  | 0.567  | 0.564  | 0.602  |
| 0.867 | 0.624  | 0.479  | 0.509  | 0.519  | 0.54   |
| 0.99  | 0.7    | 0.516  | 0.534  | 0.58   | 0.614  |
| 0.932 | 0.656  | 0.539  | 0.54   | 0.562  | 0.596  |
| 0.716 | 0.788  | 0.4267 | 0.382  | 0.384  | 0.351  |
| 0.667 | 0.748  | 0.498  | 0.351  | 0.377  | 0.311  |
| 0.588 | 0.676  | 0.428  | 0.4    | 0.346  | 0.356  |
| 0.654 | 0.756  | 0.354  | 0.35   | 0.369  | 0.413  |
| 0.465 | 0.453  | 0.443  | 0.49   | 0.459  | 0.505  |
| 0.452 | 0.47   | 0.458  | 0.561  | 0.509  | 0.531  |
| 0.436 | 0.453  | 0.428  | 0.473  | 0.455  | 0.478  |
| 0.455 | 0.4587 | 0.439  | 0.514  | 0.473  | 0.515  |
| 0.633 | 0.663  | 0.574  | 0.615  | 0.55   | 0.615  |
| 0.708 | 0.67   | 0.601  | 0.625  | 0.588  | 0.707  |
| 0.612 | 0.654  | 0.581  | 0.61   | 0.568  | 0.611  |
| 0.676 | 0.722  | 0.599  | 0.65   | 0.603  | 0.745  |
| 1.127 | 1.248  | 0.895  | 0.849  | 0.874  | 0.891  |
| 1.407 | 1.312  | 0.985  | 0.8447 | 0.8603 | 0.8757 |
| 1.027 | 1.164  | 0.829  | 0.816  | 0.848  | 0.841  |
| 1.066 | 1.167  | 0.886  | 0.869  | 0.859  | 0.895  |
| 0.867 | 0.844  | 0.746  | 0.742  | 0.71   | 0.719  |
| 0.817 | 0.792  | 0.7    | 0.707  | 0.676  | 0.695  |
| 0.886 | 0.831  | 0.704  | 0.706  | 0.699  | 0.718  |
| 0.866 | 0.802  | 0.716  | 0.724  | 0.723  | 0.7107 |
| 0.067 | 0.093  | 0.066  | 0.067  | 0.069  | 0.07   |
| 0.062 | 0.07   | 0.061  | 0.06   | 0.069  | 0.069  |
| 0.068 | 0.079  | 0.063  | 0.067  | 0.067  | 0.0695 |
| 0.078 | 0.0807 | 0.079  | 0.071  | 0.071  | 0.0695 |
| 0.307 | 0.301  | 0.275  | 0.303  | 0.296  | 0.281  |
| 0.299 | 0.314  | 0.286  | 0.298  | 0.291  | 0.296  |
| 0.286 | 0.288  | 0.295  | 0.3    | 0.286  | 0.279  |
| 0.295 | 0.294  | 0.28   | 0.294  | 0.282  | 0.262  |

|       |        |       |       |       |        |
|-------|--------|-------|-------|-------|--------|
| 0.51  | 0.478  | 0.439 | 0.443 | 0.455 | 0.414  |
| 0.521 | 0.497  | 0.448 | 0.467 | 0.458 | 0.44   |
| 0.469 | 0.499  | 0.461 | 0.465 | 0.45  | 0.424  |
| 0.489 | 0.497  | 0.437 | 0.456 | 0.455 | 0.417  |
| 0.397 | 0.404  | 0.389 | 0.392 | 0.399 | 0.385  |
| 0.408 | 0.416  | 0.388 | 0.399 | 0.402 | 0.4    |
| 0.401 | 0.4097 | 0.386 | 0.409 | 0.397 | 0.391  |
| 0.408 | 0.409  | 0.369 | 0.386 | 0.382 | 0.374  |
| 0.661 | 0.682  | 0.648 | 0.686 | 0.634 | 0.672  |
| 0.691 | 0.674  | 0.657 | 0.711 | 0.633 | 0.699  |
| 0.674 | 0.675  | 0.651 | 0.724 | 0.643 | 0.683  |
| 0.67  | 0.685  | 0.626 | 0.698 | 0.609 | 0.686  |
| 0.73  | 0.753  | 0.743 | 0.705 | 0.769 | 0.691  |
| 0.748 | 0.7477 | 0.773 | 0.688 | 0.712 | 0.742  |
| 0.759 | 0.749  | 0.757 | 0.698 | 0.757 | 0.727  |
| 0.741 | 0.741  | 0.703 | 0.628 | 0.656 | 0.704  |
| 0.786 | 0.748  | 0.68  | 0.706 | 0.707 | 0.693  |
| 0.665 | 0.769  | 0.709 | 0.729 | 0.686 | 0.78   |
| 0.645 | 0.764  | 0.749 | 0.598 | 0.541 | 0.638  |
| 0.783 | 0.595  | 0.705 | 0.719 | 0.644 | 0.628  |
| 0.572 | 0.732  | 0.74  | 0.651 | 0.713 | 0.669  |
| 0.581 | 0.812  | 0.779 | 0.697 | 0.627 | 0.728  |
| 0.491 | 0.776  | 0.764 | 0.701 | 0.632 | 0.782  |
| 0.587 | 0.827  | 0.726 | 0.702 | 0.625 | 0.779  |
| 0.344 | 0.409  | 0.528 | 0.541 | 0.557 | 0.532  |
| 0.305 | 0.47   | 0.518 | 0.562 | 0.545 | 0.612  |
| 0.348 | 0.451  | 0.598 | 0.682 | 0.622 | 0.668  |
| 0.321 | 0.522  | 0.592 | 0.697 | 0.647 | 0.687  |
| 1.006 | 0.788  | 0.635 | 0.641 | 0.666 | 0.691  |
| 1.011 | 0.788  | 0.7   | 0.645 | 0.649 | 0.7    |
| 0.836 | 0.815  | 0.699 | 0.635 | 0.651 | 0.71   |
| 0.995 | 0.794  | 0.653 | 0.611 | 0.672 | 0.703  |
| 0.67  | 0.718  | 0.664 | 0.694 | 0.669 | 0.639  |
| 0.658 | 0.735  | 0.669 | 0.711 | 0.663 | 0.655  |
| 0.642 | 0.7    | 0.673 | 0.704 | 0.655 | 0.631  |
| 0.636 | 0.712  | 0.636 | 0.691 | 0.645 | 0.624  |
| 0.681 | 0.759  | 0.79  | 0.883 | 0.809 | 0.786  |
| 0.672 | 0.81   | 0.765 | 0.856 | 0.799 | 0.7793 |
| 0.63  | 0.755  | 0.794 | 0.858 | 0.807 | 0.781  |
| 0.674 | 0.77   | 0.747 | 0.804 | 0.755 | 0.771  |

|        |        |        |       |       |       |
|--------|--------|--------|-------|-------|-------|
| 0.542  | 0.561  | 0.531  | 0.533 | 0.534 | 0.483 |
| 0.521  | 0.592  | 0.53   | 0.552 | 0.536 | 0.544 |
| 0.524  | 0.51   | 0.553  | 0.515 | 0.514 | 0.477 |
| 0.518  | 0.553  | 0.495  | 0.495 | 0.465 | 0.47  |
| 0.767  | 0.748  | 0.702  | 0.699 | 0.693 | 0.652 |
| 0.756  | 0.739  | 0.699  | 0.726 | 0.698 | 0.716 |
| 0.722  | 0.737  | 0.721  | 0.731 | 0.697 | 0.648 |
| 0.7483 | 0.742  | 0.7073 | 0.693 | 0.637 | 0.654 |
| 0.115  | 0.117  | 0.12   | 0.12  | 0.125 | 0.118 |
| 0.125  | 0.134  | 0.122  | 0.131 | 0.122 | 0.13  |
| 0.097  | 0.122  | 0.132  | 0.138 | 0.121 | 0.113 |
| 0.118  | 0.132  | 0.118  | 0.109 | 0.107 | 0.106 |
| 0.305  | 0.165  | 0.108  | 0.107 | 0.114 | 0.11  |
| 0.362  | 0.161  | 0.108  | 0.108 | 0.118 | 0.148 |
| 0.166  | 0.184  | 0.128  | 0.12  | 0.122 | 0.14  |
| 0.21   | 0.189  | 0.103  | 0.113 | 0.11  | 0.115 |
| 0.524  | 0.39   | 0.289  | 0.252 | 0.275 | 0.258 |
| 0.555  | 0.363  | 0.262  | 0.263 | 0.273 | 0.304 |
| 0.399  | 0.394  | 0.277  | 0.265 | 0.266 | 0.306 |
| 0.486  | 0.386  | 0.258  | 0.249 | 0.244 | 0.296 |
| 0.267  | 0.23   | 0.263  | 0.152 | 0.147 | 0.153 |
| 0.353  | 0.237  | 0.206  | 0.139 | 0.146 | 0.133 |
| 0.315  | 0.2493 | 0.186  | 0.167 | 0.175 | 0.161 |
| 0.3117 | 0.281  | 0.249  | 0.165 | 0.149 | 0.185 |
| 0.452  | 0.45   | 0.452  | 0.448 | 0.447 | 0.432 |
| 0.47   | 0.468  | 0.458  | 0.459 | 0.439 | 0.451 |
| 0.441  | 0.436  | 0.459  | 0.451 | 0.426 | 0.433 |
| 0.451  | 0.452  | 0.441  | 0.445 | 0.421 | 0.425 |
| 0.571  | 0.596  | 0.609  | 0.597 | 0.602 | 0.56  |
| 0.576  | 0.607  | 0.617  | 0.605 | 0.594 | 0.556 |
| 0.595  | 0.587  | 0.61   | 0.601 | 0.596 | 0.544 |
| 0.579  | 0.594  | 0.594  | 0.604 | 0.599 | 0.548 |
| 0.93   | 1      | 0.736  | 0.619 | 0.641 | 0.59  |
| 0.897  | 1.074  | 0.759  | 0.665 | 0.677 | 0.617 |
| 0.788  | 0.921  | 0.825  | 0.642 | 0.669 | 0.64  |
| 0.872  | 1.038  | 0.76   | 0.624 | 0.631 | 0.598 |
| 0.719  | 0.648  | 0.636  | 0.594 | 0.639 | 0.615 |
| 0.73   | 0.656  | 0.645  | 0.588 | 0.63  | 0.676 |
| 0.642  | 0.639  | 0.668  | 0.63  | 0.673 | 0.672 |

|       |       |       |       |        |       |
|-------|-------|-------|-------|--------|-------|
| 0.682 | 0.694 | 0.621 | 0.583 | 0.616  | 0.617 |
| 0.05  | 0.075 | 0.053 | 0.048 | 0.069  | 0.046 |
| 0.07  | 0.089 | 0.053 | 0.05  | 0.0603 | 0.064 |
| 0.038 | 0.087 | 0.07  | 0.057 | 0.061  | 0.066 |
| 0.073 | 0.102 | 0.056 | 0.052 | 0.051  | 0.061 |
| 0.326 | 0.296 | 0.309 | 0.298 | 0.305  | 0.334 |
| 0.335 | 0.293 | 0.306 | 0.302 | 0.307  | 0.329 |
| 0.291 | 0.304 | 0.317 | 0.311 | 0.31   | 0.329 |
| 0.32  | 0.299 | 0.311 | 0.31  | 0.302  | 0.329 |
| 0.533 | 0.543 | 0.512 | 0.516 | 0.523  | 0.466 |
| 0.523 | 0.523 | 0.492 | 0.53  | 0.523  | 0.469 |
| 0.486 | 0.549 | 0.513 | 0.531 | 0.502  | 0.443 |
| 0.543 | 0.528 | 0.49  | 0.527 | 0.485  | 0.435 |
| 0.381 | 0.342 | 0.371 | 0.37  | 0.393  | 0.402 |
| 0.465 | 0.352 | 0.36  | 0.388 | 0.388  | 0.376 |
| 0.298 | 0.413 | 0.454 | 0.443 | 0.441  | 0.437 |
| 0.408 | 0.398 | 0.391 | 0.441 | 0.439  | 0.432 |
| 0.581 | 0.612 | 0.627 | 0.61  | 0.626  | 0.636 |
| 0.708 | 0.634 | 0.589 | 0.579 | 0.558  | 0.603 |
| 0.529 | 0.712 | 0.746 | 0.725 | 0.688  | 0.662 |
| 0.649 | 0.63  | 0.682 | 0.692 | 0.672  | 0.682 |
| 0.649 | 0.717 | 0.698 | 0.675 | 0.726  | 0.683 |
| 0.716 | 0.757 | 0.643 | 0.647 | 0.627  | 0.682 |
| 0.627 | 0.805 | 0.799 | 0.73  | 0.72   | 0.773 |
| 0.689 | 0.742 | 0.728 | 0.699 | 0.689  | 0.79  |
| 0.583 | 0.583 | 0.609 | 0.539 | 0.618  | 0.597 |
| 0.719 | 0.573 | 0.6   | 0.589 | 0.632  | 0.625 |
| 0.455 | 0.578 | 0.754 | 0.702 | 0.686  | 0.705 |
| 0.687 | 0.65  | 0.677 | 0.661 | 0.672  | 0.705 |
| 0.457 | 0.598 | 0.803 | 0.758 | 0.794  | 0.763 |
| 0.566 | 0.661 | 0.763 | 0.778 | 0.756  | 0.777 |
| 0.378 | 0.723 | 0.936 | 0.893 | 0.889  | 0.991 |
| 0.534 | 0.719 | 0.91  | 0.995 | 0.869  | 1.027 |
| 0.331 | 0.502 | 0.796 | 0.757 | 0.907  | 0.87  |
| 0.359 | 0.561 | 0.727 | 0.774 | 0.802  | 0.841 |
| 0.255 | 0.53  | 0.865 | 0.885 | 0.937  | 0.916 |

|       |        |       |       |        |       |
|-------|--------|-------|-------|--------|-------|
| 0.429 | 0.525  | 0.758 | 0.847 | 0.837  | 0.897 |
| 0.891 | 0.839  | 0.716 | 0.708 | 0.756  | 0.775 |
| 0.938 | 0.841  | 0.695 | 0.709 | 0.731  | 0.774 |
| 0.849 | 0.821  | 0.706 | 0.712 | 0.706  | 0.776 |
| 0.885 | 0.777  | 0.673 | 0.705 | 0.711  | 0.794 |
| 0.766 | 0.729  | 0.718 | 0.696 | 0.7153 | 0.717 |
| 0.754 | 0.702  | 0.685 | 0.7   | 0.718  | 0.707 |
| 0.721 | 0.73   | 0.722 | 0.713 | 0.715  | 0.701 |
| 0.727 | 0.699  | 0.681 | 0.713 | 0.713  | 0.705 |
| 0.533 | 0.606  | 0.651 | 0.627 | 0.649  | 0.66  |
| 0.601 | 0.591  | 0.642 | 0.596 | 0.606  | 0.674 |
| 0.495 | 0.616  | 0.677 | 0.644 | 0.667  | 0.714 |
| 0.575 | 0.576  | 0.629 | 0.613 | 0.592  | 0.706 |
| 0.853 | 0.95   | 0.825 | 0.813 | 0.789  | 0.823 |
| 0.655 | 0.857  | 0.718 | 0.747 | 0.734  | 0.873 |
| 0.869 | 0.831  | 0.665 | 0.682 | 0.65   | 0.612 |
| 0.822 | 0.715  | 0.588 | 0.625 | 0.601  | 0.606 |
| 0.719 | 0.766  | 0.701 | 0.674 | 0.707  | 0.779 |
| 0.842 | 0.757  | 0.664 | 0.658 | 0.673  | 0.749 |
| 0.648 | 0.88   | 0.832 | 0.799 | 0.793  | 0.855 |
| 0.821 | 0.796  | 0.745 | 0.768 | 0.771  | 0.86  |
| 0.104 | 0.121  | 0.133 | 0.117 | 0.123  | 0.123 |
| 0.133 | 0.118  | 0.102 | 0.113 | 0.111  | 0.118 |
| 0.08  | 0.146  | 0.162 | 0.16  | 0.151  | 0.134 |
| 0.124 | 0.12   | 0.121 | 0.143 | 0.13   | 0.138 |
| 0.19  | 0.154  | 0.104 | 0.107 | 0.118  | 0.121 |
| 0.332 | 0.129  | 0.103 | 0.109 | 0.113  | 0.131 |
| 0.098 | 0.187  | 0.148 | 0.137 | 0.139  | 0.156 |
| 0.239 | 0.149  | 0.121 | 0.127 | 0.134  | 0.154 |
| 0.408 | 0.342  | 0.272 | 0.229 | 0.268  | 0.253 |
| 0.591 | 0.337  | 0.247 | 0.25  | 0.244  | 0.274 |
| 0.267 | 0.424  | 0.355 | 0.312 | 0.318  | 0.371 |
| 0.471 | 0.347  | 0.288 | 0.295 | 0.302  | 0.357 |
| 0.24  | 0.2185 | 0.223 | 0.162 | 0.172  | 0.168 |
| 0.424 | 0.238  | 0.214 | 0.168 | 0.177  | 0.143 |
| 0.267 | 0.199  | 0.269 | 0.24  | 0.243  | 0.304 |
| 0.137 | 0.2185 | 0.256 | 0.235 | 0.306  | 0.318 |
| 0.502 | 0.518  | 0.538 | 0.54  | 0.521  | 0.516 |
| 0.488 | 0.52   | 0.528 | 0.538 | 0.473  | 0.51  |

|        |        |       |        |        |       |
|--------|--------|-------|--------|--------|-------|
| 0.495  | 0.492  | 0.497 | 0.514  | 0.469  | 0.501 |
| 0.503  | 0.471  | 0.485 | 0.508  | 0.442  | 0.489 |
| 0.573  | 0.628  | 0.626 | 0.595  | 0.602  | 0.6   |
| 0.625  | 0.613  | 0.624 | 0.595  | 0.598  | 0.604 |
| 0.581  | 0.626  | 0.623 | 0.588  | 0.5903 | 0.61  |
| 0.603  | 0.605  | 0.606 | 0.589  | 0.571  | 0.613 |
| 0.878  | 0.926  | 0.819 | 0.776  | 0.754  | 0.643 |
| 1.012  | 0.926  | 0.785 | 0.755  | 0.722  | 0.683 |
| 0.787  | 0.947  | 0.868 | 0.829  | 0.749  | 0.669 |
| 0.915  | 0.871  | 0.785 | 0.79   | 0.735  | 0.739 |
| 0.699  | 0.636  | 0.608 | 0.585  | 0.626  | 0.588 |
| 0.832  | 0.665  | 0.609 | 0.605  | 0.606  | 0.587 |
| 0.624  | 0.736  | 0.678 | 0.649  | 0.661  | 0.643 |
| 0.757  | 0.737  | 0.659 | 0.661  | 0.661  | 0.635 |
| 0.043  | 0.063  | 0.059 | 0.053  | 0.055  | 0.057 |
| 0.06   | 0.066  | 0.043 | 0.042  | 0.036  | 0.047 |
| 0.04   | 0.076  | 0.069 | 0.065  | 0.054  | 0.063 |
| 0.056  | 0.059  | 0.049 | 0.048  | 0.044  | 0.054 |
| 0.229  | 0.267  | 0.275 | 0.266  | 0.268  | 0.257 |
| 0.257  | 0.27   | 0.28  | 0.2727 | 0.275  | 0.268 |
| 0.252  | 0.279  | 0.275 | 0.276  | 0.275  | 0.263 |
| 0.272  | 0.28   | 0.273 | 0.276  | 0.267  | 0.269 |
| 0.395  | 0.42   | 0.406 | 0.393  | 0.376  | 0.397 |
| 0.461  | 0.434  | 0.412 | 0.414  | 0.377  | 0.4   |
| 0.439  | 0.456  | 0.435 | 0.444  | 0.413  | 0.406 |
| 0.502  | 0.48   | 0.439 | 0.453  | 0.379  | 0.419 |
| 0.364  | 0.39   | 0.411 | 0.376  | 0.426  | 0.395 |
| 0.4    | 0.418  | 0.41  | 0.392  | 0.407  | 0.405 |
| 0.403  | 0.438  | 0.439 | 0.408  | 0.431  | 0.399 |
| 0.427  | 0.428  | 0.432 | 0.403  | 0.425  | 0.417 |
| 0.7413 | 0.671  | 0.714 | 0.65   | 0.666  | 0.62  |
| 0.739  | 0.702  | 0.703 | 0.67   | 0.664  | 0.692 |
| 0.717  | 0.741  | 0.75  | 0.749  | 0.734  | 0.679 |
| 0.768  | 0.714  | 0.741 | 0.74   | 0.738  | 0.732 |
| 0.504  | 0.8497 | 0.864 | 0.765  | 0.753  | 0.693 |
| 0.792  | 0.84   | 0.796 | 0.726  | 0.706  | 0.745 |

|        |        |       |       |        |       |
|--------|--------|-------|-------|--------|-------|
| 0.786  | 0.899  | 0.825 | 0.78  | 0.737  | 0.779 |
| 0.851  | 0.81   | 0.798 | 0.695 | 0.695  | 0.813 |
| 0.6343 | 0.652  | 0.661 | 0.612 | 0.638  | 0.627 |
| 0.627  | 0.605  | 0.629 | 0.614 | 0.625  | 0.62  |
| 0.604  | 0.648  | 0.646 | 0.645 | 0.6293 | 0.631 |
| 0.672  | 0.617  | 0.666 | 0.625 | 0.625  | 0.63  |
| 0.379  | 0.674  | 0.905 | 0.758 | 0.695  | 0.625 |
| 0.632  | 0.81   | 0.815 | 0.75  | 0.671  | 0.733 |
| 0.612  | 0.865  | 0.849 | 0.785 | 0.716  | 0.734 |
| 0.662  | 0.828  | 0.887 | 0.764 | 0.705  | 0.733 |
| 0.276  | 0.521  | 0.817 | 0.754 | 0.751  | 0.588 |
| 0.341  | 0.614  | 0.794 | 0.777 | 0.736  | 0.694 |
| 0.374  | 0.6    | 0.808 | 0.795 | 0.775  | 0.673 |
| 0.398  | 0.644  | 0.865 | 0.821 | 0.797  | 0.703 |
| 0.649  | 0.61   | 0.633 | 0.605 | 0.612  | 0.604 |
| 0.898  | 0.682  | 0.61  | 0.579 | 0.606  | 0.639 |
| 0.836  | 0.747  | 0.643 | 0.631 | 0.636  | 0.664 |
| 0.905  | 0.697  | 0.63  | 0.609 | 0.643  | 0.689 |
| 0.562  | 0.585  | 0.607 | 0.592 | 0.562  | 0.569 |
| 0.605  | 0.592  | 0.593 | 0.591 | 0.555  | 0.587 |
| 0.597  | 0.608  | 0.603 | 0.606 | 0.58   | 0.583 |
| 0.616  | 0.602  | 0.605 | 0.609 | 0.569  | 0.583 |
| 0.464  | 0.682  | 0.761 | 0.65  | 0.672  | 0.692 |
| 0.595  | 0.747  | 0.742 | 0.648 | 0.648  | 0.74  |
| 0.585  | 0.761  | 0.73  | 0.676 | 0.684  | 0.734 |
| 0.663  | 0.746  | 0.705 | 0.627 | 0.647  | 0.781 |
| 0.4997 | 0.454  | 0.47  | 0.467 | 0.519  | 0.437 |
| 0.496  | 0.498  | 0.462 | 0.487 | 0.476  | 0.494 |
| 0.483  | 0.53   | 0.488 | 0.529 | 0.511  | 0.486 |
| 0.52   | 0.52   | 0.48  | 0.493 | 0.491  | 0.51  |
| 0.663  | 0.717  | 0.73  | 0.711 | 0.704  | 0.699 |
| 0.825  | 0.762  | 0.722 | 0.73  | 0.697  | 0.748 |
| 0.786  | 0.81   | 0.771 | 0.775 | 0.721  | 0.75  |
| 0.839  | 0.787  | 0.783 | 0.77  | 0.733  | 0.808 |
| 0.1197 | 0.1253 | 0.123 | 0.117 | 0.13   | 0.109 |
| 0.11   | 0.123  | 0.129 | 0.128 | 0.119  | 0.123 |
| 0.12   | 0.127  | 0.136 | 0.134 | 0.132  | 0.117 |
| 0.129  | 0.126  | 0.134 | 0.128 | 0.105  | 0.13  |
| 0.073  | 0.097  | 0.104 | 0.096 | 0.118  | 0.114 |

|       |       |       |        |       |        |
|-------|-------|-------|--------|-------|--------|
| 0.18  | 0.15  | 0.112 | 0.114  | 0.112 | 0.133  |
| 0.277 | 0.15  | 0.111 | 0.108  | 0.121 | 0.129  |
| 0.257 | 0.145 | 0.119 | 0.112  | 0.124 | 0.138  |
| 0.173 | 0.251 | 0.251 | 0.2567 | 0.26  | 0.251  |
| 0.427 | 0.32  | 0.259 | 0.273  | 0.257 | 0.285  |
| 0.43  | 0.32  | 0.248 | 0.244  | 0.273 | 0.282  |
| 0.511 | 0.306 | 0.254 | 0.253  | 0.278 | 0.3    |
| 0.326 | 0.164 | 0.112 | 0.138  | 0.114 | 0.148  |
| 0.461 | 0.247 | 0.185 | 0.117  | 0.128 | 0.121  |
| 0.068 | 0.081 | 0.206 | 0.151  | 0.131 | 0.151  |
| 0.062 | 0.354 | 0.174 | 0.165  | 0.141 | 0.147  |
| 0.357 | 0.378 | 0.411 | 0.427  | 0.383 | 0.376  |
| 0.405 | 0.407 | 0.44  | 0.422  | 0.377 | 0.411  |
| 0.39  | 0.419 | 0.417 | 0.438  | 0.396 | 0.426  |
| 0.42  | 0.427 | 0.43  | 0.446  | 0.375 | 0.432  |
| 0.505 | 0.548 | 0.515 | 0.508  | 0.515 | 0.515  |
| 0.55  | 0.548 | 0.521 | 0.515  | 0.533 | 0.528  |
| 0.531 | 0.566 | 0.517 | 0.526  | 0.538 | 0.539  |
| 0.556 | 0.581 | 0.534 | 0.547  | 0.547 | 0.536  |
| 0.641 | 0.784 | 0.716 | 0.548  | 0.565 | 0.509  |
| 0.983 | 0.883 | 0.733 | 0.587  | 0.55  | 0.58   |
| 0.904 | 0.934 | 0.747 | 0.679  | 0.622 | 0.565  |
| 0.985 | 0.908 | 0.736 | 0.684  | 0.631 | 0.593  |
| 0.623 | 0.604 | 0.657 | 0.645  | 0.654 | 0.634  |
| 0.73  | 0.639 | 0.623 | 0.626  | 0.626 | 0.661  |
| 0.755 | 0.674 | 0.664 | 0.673  | 0.654 | 0.666  |
| 0.742 | 0.65  | 0.665 | 0.649  | 0.65  | 0.669  |
| 0.035 | 0.074 | 0.079 | 0.07   | 0.058 | 0.05   |
| 0.069 | 0.095 | 0.091 | 0.065  | 0.052 | 0.075  |
| 0.101 | 0.082 | 0.07  | 0.061  | 0.059 | 0.069  |
| 0.095 | 0.087 | 0.088 | 0.063  | 0.062 | 0.084  |
| 0.285 | 0.289 | 0.299 | 0.323  | 0.292 | 0.287  |
| 0.288 | 0.299 | 0.309 | 0.333  | 0.297 | 0.285  |
| 0.306 | 0.262 | 0.28  | 0.302  | 0.277 | 0.2827 |
| 0.289 | 0.265 | 0.279 | 0.295  | 0.275 | 0.276  |
| 0.508 | 0.503 | 0.455 | 0.445  | 0.468 | 0.445  |

|       |       |       |       |       |       |
|-------|-------|-------|-------|-------|-------|
| 0.523 | 0.503 | 0.478 | 0.468 | 0.478 | 0.424 |
| 0.516 | 0.454 | 0.433 | 0.435 | 0.447 | 0.364 |
| 0.517 | 0.462 | 0.428 | 0.416 | 0.436 | 0.405 |
| 0.353 | 0.38  | 0.376 | 0.353 | 0.391 | 0.384 |
| 0.404 | 0.369 | 0.378 | 0.369 | 0.388 | 0.372 |
| 0.377 | 0.403 | 0.422 | 0.39  | 0.417 | 0.375 |
| 0.408 | 0.412 | 0.405 | 0.394 | 0.412 | 0.412 |
| 0.698 | 0.659 | 0.661 | 0.619 | 0.636 | 0.656 |
| 0.744 | 0.666 | 0.664 | 0.657 | 0.673 | 0.672 |
| 0.692 | 0.712 | 0.715 | 0.69  | 0.702 | 0.614 |
| 0.749 | 0.715 | 0.733 | 0.69  | 0.7   | 0.688 |
| 0.492 | 0.727 | 0.643 | 0.618 | 0.596 | 0.624 |
| 0.642 | 0.705 | 0.638 | 0.631 | 0.631 | 0.583 |
| 0.572 | 0.711 | 0.673 | 0.645 | 0.607 | 0.533 |
| 0.686 | 0.76  | 0.74  | 0.646 | 0.615 | 0.674 |
| 0.565 | 0.528 | 0.511 | 0.525 | 0.526 | 0.554 |
| 0.594 | 0.563 | 0.529 | 0.563 | 0.516 | 0.501 |
| 0.645 | 0.602 | 0.617 | 0.603 | 0.551 | 0.592 |
| 0.634 | 0.619 | 0.589 | 0.598 | 0.571 | 0.605 |
| 0.485 | 0.768 | 0.837 | 0.772 | 0.802 | 0.845 |
| 0.663 | 0.81  | 0.898 | 0.814 | 0.797 | 0.755 |
| 0.587 | 0.833 | 0.961 | 0.901 | 0.839 | 0.771 |
| 0.694 | 0.876 | 1.024 | 0.896 | 0.869 | 0.875 |
| 0.261 | 0.497 | 0.71  | 0.773 | 0.788 | 0.808 |
| 0.342 | 0.549 | 0.784 | 0.871 | 0.853 | 0.779 |
| 0.33  | 0.58  | 0.877 | 0.908 | 0.9   | 0.708 |
| 0.408 | 0.631 | 0.907 | 0.935 | 0.924 | 0.843 |
| 0.783 | 0.816 | 0.667 | 0.66  | 0.69  | 0.76  |
| 0.895 | 0.835 | 0.694 | 0.674 | 0.665 | 0.738 |
| 0.907 | 0.743 | 0.643 | 0.609 | 0.609 | 0.607 |
| 0.919 | 0.743 | 0.635 | 0.62  | 0.617 | 0.678 |
| 0.635 | 0.675 | 0.663 | 0.677 | 0.625 | 0.627 |
| 0.636 | 0.681 | 0.679 | 0.704 | 0.636 | 0.618 |
| 0.686 | 0.615 | 0.628 | 0.657 | 0.588 | 0.547 |
| 0.633 | 0.625 | 0.634 | 0.621 | 0.568 | 0.592 |
| 0.601 | 0.696 | 0.731 | 0.774 | 0.75  | 0.773 |
| 0.685 | 0.733 | 0.747 | 0.784 | 0.76  | 0.755 |
| 0.658 | 0.728 | 0.753 | 0.753 | 0.738 | 0.768 |
| 0.71  | 0.749 | 0.763 | 0.76  | 0.745 | 0.776 |

|        |       |        |       |        |        |
|--------|-------|--------|-------|--------|--------|
| 0.519  | 0.526 | 0.554  | 0.557 | 0.593  | 0.566  |
| 0.523  | 0.532 | 0.57   | 0.583 | 0.601  | 0.558  |
| 0.5173 | 0.529 | 0.508  | 0.49  | 0.524  | 0.401  |
| 0.51   | 0.529 | 0.51   | 0.492 | 0.513  | 0.487  |
| 0.664  | 0.697 | 0.6977 | 0.675 | 0.7027 | 0.691  |
| 0.765  | 0.676 | 0.642  | 0.699 | 0.699  | 0.682  |
| 0.722  | 0.716 | 0.704  | 0.708 | 0.704  | 0.6865 |
| 0.823  | 0.798 | 0.747  | 0.705 | 0.705  | 0.6865 |
| 0.092  | 0.098 | 0.098  | 0.114 | 0.115  | 0.121  |
| 0.117  | 0.121 | 0.106  | 0.129 | 0.126  | 0.116  |
| 0.096  | 0.122 | 0.137  | 0.133 | 0.13   | 0.121  |
| 0.133  | 0.139 | 0.139  | 0.129 | 0.114  | 0.126  |
| 0.138  | 0.143 | 0.097  | 0.097 | 0.114  | 0.137  |
| 0.306  | 0.152 | 0.108  | 0.115 | 0.124  | 0.133  |
| 0.209  | 0.176 | 0.131  | 0.114 | 0.124  | 0.113  |
| 0.247  | 0.177 | 0.126  | 0.119 | 0.138  | 0.153  |
| 0.305  | 0.317 | 0.241  | 0.218 | 0.239  | 0.287  |
| 0.512  | 0.32  | 0.241  | 0.237 | 0.254  | 0.271  |
| 0.353  | 0.366 | 0.296  | 0.261 | 0.278  | 0.213  |
| 0.502  | 0.357 | 0.276  | 0.283 | 0.31   | 0.344  |
| 0.357  | 0.124 | 0.201  | 0.143 | 0.153  | 0.147  |
| 0.337  | 0.278 | 0.248  | 0.148 | 0.148  | 0.17   |
| 0.13   | 0.115 | 0.192  | 0.166 | 0.135  | 0.1553 |
| 0.071  | 0.379 | 0.22   | 0.178 | 0.15   | 0.149  |
| 0.422  | 0.426 | 0.444  | 0.427 | 0.446  | 0.471  |
| 0.44   | 0.441 | 0.444  | 0.43  | 0.452  | 0.447  |
| 0.4317 | 0.41  | 0.409  | 0.439 | 0.429  | 0.4493 |
| 0.433  | 0.422 | 0.435  | 0.424 | 0.423  | 0.43   |
| 0.562  | 0.583 | 0.597  | 0.58  | 0.564  | 0.609  |
| 0.542  | 0.589 | 0.604  | 0.606 | 0.578  | 0.606  |
| 0.567  | 0.551 | 0.56   | 0.583 | 0.539  | 0.538  |
| 0.569  | 0.558 | 0.568  | 0.561 | 0.536  | 0.574  |
| 0.806  | 0.944 | 0.774  | 0.712 | 0.741  | 0.671  |
| 0.911  | 0.998 | 0.789  | 0.756 | 0.753  | 0.735  |
| 0.934  | 0.871 | 0.716  | 0.687 | 0.679  | 0.546  |
| 0.885  | 0.916 | 0.732  | 0.641 | 0.68   | 0.635  |
| 0.62   | 0.644 | 0.627  | 0.611 | 0.641  | 0.608  |
| 0.674  | 0.631 | 0.611  | 0.614 | 0.649  | 0.631  |
| 0.648  | 0.677 | 0.654  | 0.628 | 0.673  | 0.599  |
| 0.679  | 0.681 | 0.656  | 0.651 | 0.666  | 0.646  |

|       |       |       |       |       |        |
|-------|-------|-------|-------|-------|--------|
| 0.051 | 0.071 | 0.051 | 0.049 | 0.052 | 0.073  |
| 0.088 | 0.083 | 0.057 | 0.061 | 0.057 | 0.073  |
| 0.057 | 0.09  | 0.096 | 0.07  | 0.064 | 0.068  |
| 0.096 | 0.113 | 0.079 | 0.081 | 0.066 | 0.0713 |

|       |       |       |       |       |       |
|-------|-------|-------|-------|-------|-------|
| 0.266 | 0.27  | 0.272 | 0.273 | 0.277 | 0.285 |
| 0.281 | 0.282 | 0.277 | 0.281 | 0.274 | 0.285 |
| 0.282 | 0.276 | 0.271 | 0.274 | 0.275 | 0.28  |
| 0.28  | 0.284 | 0.277 | 0.282 | 0.276 | 0.277 |

|       |       |       |       |       |       |
|-------|-------|-------|-------|-------|-------|
| 0.456 | 0.463 | 0.43  | 0.443 | 0.42  | 0.45  |
| 0.505 | 0.512 | 0.453 | 0.453 | 0.43  | 0.454 |
| 0.501 | 0.471 | 0.427 | 0.453 | 0.43  | 0.448 |
| 0.505 | 0.485 | 0.436 | 0.455 | 0.436 | 0.459 |

|       |       |       |       |       |       |
|-------|-------|-------|-------|-------|-------|
| 0.372 | 0.387 | 0.373 | 0.376 | 0.393 | 0.4   |
| 0.403 | 0.403 | 0.394 | 0.388 | 0.379 | 0.376 |
| 0.418 | 0.377 | 0.373 | 0.373 | 0.371 | 0.367 |
| 0.411 | 0.373 | 0.383 | 0.37  | 0.374 | 0.38  |

|       |        |        |       |       |       |
|-------|--------|--------|-------|-------|-------|
| 0.574 | 0.63   | 0.599  | 0.634 | 0.689 | 0.678 |
| 0.59  | 0.6223 | 0.5997 | 0.713 | 0.667 | 0.66  |
| 0.671 | 0.612  | 0.599  | 0.628 | 0.661 | 0.626 |
| 0.621 | 0.625  | 0.601  | 0.644 | 0.656 | 0.638 |

|       |       |       |       |       |       |
|-------|-------|-------|-------|-------|-------|
| 0.561 | 0.732 | 0.741 | 0.722 | 0.704 | 0.71  |
| 0.644 | 0.845 | 0.813 | 0.674 | 0.713 | 0.675 |
| 0.708 | 0.717 | 0.686 | 0.657 | 0.721 | 0.706 |
| 0.764 | 0.784 | 0.782 | 0.647 | 0.678 | 0.669 |

|       |       |       |       |       |       |
|-------|-------|-------|-------|-------|-------|
| 0.666 | 0.602 | 0.588 | 0.586 | 0.589 | 0.623 |
| 0.603 | 0.647 | 0.614 | 0.619 | 0.573 | 0.649 |
| 0.653 | 0.572 | 0.526 | 0.558 | 0.536 | 0.612 |
| 0.651 | 0.611 | 0.575 | 0.582 | 0.531 | 0.595 |

|       |       |       |       |       |       |
|-------|-------|-------|-------|-------|-------|
| 0.518 | 0.755 | 0.8   | 0.781 | 0.8   | 0.852 |
| 0.567 | 0.787 | 0.831 | 0.767 | 0.741 | 0.929 |
| 0.615 | 0.685 | 0.77  | 0.721 | 0.697 | 0.914 |
| 0.589 | 0.763 | 0.817 | 0.731 | 0.667 | 0.825 |

|       |       |       |       |       |       |
|-------|-------|-------|-------|-------|-------|
| 0.291 | 0.494 | 0.711 | 0.774 | 0.78  | 0.76  |
| 0.285 | 0.528 | 0.735 | 0.78  | 0.76  | 0.81  |
| 0.341 | 0.477 | 0.665 | 0.718 | 0.711 | 0.752 |
| 0.322 | 0.506 | 0.696 | 0.721 | 0.666 | 0.709 |

|        |       |        |       |       |        |
|--------|-------|--------|-------|-------|--------|
| 0.752  | 0.815 | 0.698  | 0.695 | 0.726 | 0.779  |
| 0.973  | 0.87  | 0.722  | 0.681 | 0.675 | 0.751  |
| 0.915  | 0.862 | 0.713  | 0.711 | 0.721 | 0.814  |
| 0.999  | 0.872 | 0.721  | 0.695 | 0.708 | 0.763  |
| 0.596  | 0.615 | 0.662  | 0.63  | 0.615 | 0.634  |
| 0.65   | 0.67  | 0.707  | 0.673 | 0.61  | 0.646  |
| 0.616  | 0.661 | 0.69   | 0.645 | 0.621 | 0.625  |
| 0.653  | 0.659 | 0.69   | 0.671 | 0.616 | 0.633  |
| 0.488  | 0.58  | 0.619  | 0.634 | 0.589 | 0.694  |
| 0.559  | 0.632 | 0.666  | 0.629 | 0.555 | 0.655  |
| 0.571  | 0.56  | 0.577  | 0.625 | 0.592 | 0.591  |
| 0.628  | 0.639 | 0.651  | 0.63  | 0.589 | 0.631  |
| 0.476  | 0.474 | 0.525  | 0.506 | 0.633 | 0.599  |
| 0.551  | 0.532 | 0.5497 | 0.588 | 0.635 | 0.552  |
| 0.555  | 0.484 | 0.535  | 0.522 | 0.598 | 0.525  |
| 0.637  | 0.529 | 0.589  | 0.513 | 0.586 | 0.544  |
| 0.746  | 0.758 | 0.794  | 0.728 | 0.756 | 0.794  |
| 0.831  | 0.825 | 0.864  | 0.778 | 0.745 | 0.773  |
| 0.823  | 0.761 | 0.797  | 0.741 | 0.745 | 0.765  |
| 0.84   | 0.788 | 0.822  | 0.769 | 0.745 | 0.79   |
| 0.0965 | 0.09  | 0.094  | 0.094 | 0.099 | 0.101  |
| 0.0965 | 0.102 | 0.106  | 0.104 | 0.096 | 0.098  |
| 0.101  | 0.088 | 0.093  | 0.092 | 0.086 | 0.088  |
| 0.092  | 0.093 | 0.093  | 0.093 | 0.094 | 0.0957 |
| 0.183  | 0.134 | 0.111  | 0.113 | 0.129 | 0.149  |
| 0.18   | 0.179 | 0.133  | 0.129 | 0.133 | 0.166  |
| 0.246  | 0.145 | 0.103  | 0.105 | 0.116 | 0.129  |
| 0.263  | 0.169 | 0.124  | 0.112 | 0.119 | 0.125  |
| 0.325  | 0.312 | 0.254  | 0.241 | 0.272 | 0.32   |
| 0.399  | 0.394 | 0.312  | 0.305 | 0.292 | 0.317  |
| 0.484  | 0.31  | 0.255  | 0.257 | 0.27  | 0.279  |
| 0.512  | 0.343 | 0.281  | 0.254 | 0.27  | 0.29   |
| 0.443  | 0.115 | 0.173  | 0.152 | 0.126 | 0.156  |
| 0.393  | 0.322 | 0.207  | 0.177 | 0.149 | 0.161  |
| 0.085  | 0.146 | 0.237  | 0.181 | 0.168 | 0.176  |
| 0.097  | 0.346 | 0.238  | 0.186 | 0.176 | 0.174  |
| 0.4415 | 0.435 | 0.437  | 0.397 | 0.439 | 0.438  |
| 0.4415 | 0.476 | 0.479  | 0.446 | 0.431 | 0.416  |
| 0.438  | 0.442 | 0.436  | 0.398 | 0.406 | 0.41   |

|       |       |       |        |       |       |
|-------|-------|-------|--------|-------|-------|
| 0.445 | 0.45  | 0.465 | 0.442  | 0.414 | 0.44  |
| 0.571 | 0.562 | 0.53  | 0.537  | 0.561 | 0.575 |
| 0.587 | 0.581 | 0.536 | 0.551  | 0.54  | 0.565 |
| 0.584 | 0.575 | 0.543 | 0.559  | 0.57  | 0.567 |
| 0.587 | 0.586 | 0.54  | 0.553  | 0.559 | 0.574 |
| 0.798 | 0.913 | 0.747 | 0.755  | 0.727 | 0.738 |
| 0.916 | 1.008 | 0.843 | 0.821  | 0.791 | 0.76  |
| 0.932 | 0.95  | 0.788 | 0.824  | 0.798 | 0.689 |
| 0.826 | 0.841 | 0.854 | 0.857  | 0.818 | 0.659 |
| 0.648 | 0.673 | 0.62  | 0.594  | 0.628 | 0.664 |
| 0.698 | 0.682 | 0.638 | 0.604  | 0.627 | 0.667 |
| 0.707 | 0.681 | 0.606 | 0.59   | 0.633 | 0.66  |
| 0.714 | 0.669 | 0.61  | 0.591  | 0.618 | 0.644 |
| 0.056 | 0.08  | 0.075 | 0.064  | 0.088 | 0.139 |
| 0.087 | 0.118 | 0.114 | 0.08   | 0.08  | 0.145 |
| 0.106 | 0.091 | 0.079 | 0.063  | 0.079 | 0.107 |
| 0.116 | 0.11  | 0.097 | 0.074  | 0.077 | 0.14  |
| 0.281 | 0.266 | 0.241 | 0.263  | 0.259 | 0.257 |
| 0.283 | 0.298 | 0.274 | 0.29   | 0.252 | 0.273 |
| 0.274 | 0.284 | 0.247 | 0.27   | 0.255 | 0.25  |
| 0.286 | 0.266 | 0.268 | 0.28   | 0.256 | 0.268 |
| 0.449 | 0.437 | 0.402 | 0.418  | 0.418 | 0.421 |
| 0.453 | 0.462 | 0.423 | 0.434  | 0.411 | 0.42  |
| 0.45  | 0.425 | 0.389 | 0.416  | 0.414 | 0.428 |
| 0.444 | 0.423 | 0.4   | 0.408  | 0.408 | 0.426 |
| 0.3   | 0.402 | 0.382 | 0.394  | 0.413 | 0.384 |
| 0.353 | 0.401 | 0.391 | 0.399  | 0.399 | 0.402 |
| 0.374 | 0.386 | 0.364 | 0.379  | 0.387 | 0.369 |
| 0.376 | 0.392 | 0.374 | 0.38   | 0.376 | 0.353 |
| 0.637 | 0.646 | 0.63  | 0.632  | 0.636 | 0.644 |
| 0.658 | 0.651 | 0.654 | 0.6283 | 0.625 | 0.662 |
| 0.629 | 0.624 | 0.608 | 0.628  | 0.601 | 0.605 |
| 0.624 | 0.621 | 0.63  | 0.625  | 0.618 | 0.645 |
| 0.48  | 0.637 | 0.649 | 0.693  | 0.743 | 0.668 |
| 0.62  | 0.685 | 0.668 | 0.599  | 0.666 | 0.683 |
| 0.618 | 0.62  | 0.704 | 0.558  | 0.666 | 0.653 |

|        |       |       |       |       |        |
|--------|-------|-------|-------|-------|--------|
| 0.656  | 0.63  | 0.694 | 0.59  | 0.702 | 0.668  |
| 0.509  | 0.597 | 0.593 | 0.597 | 0.6   | 0.567  |
| 0.625  | 0.628 | 0.62  | 0.619 | 0.553 | 0.545  |
| 0.633  | 0.557 | 0.53  | 0.593 | 0.516 | 0.624  |
| 0.618  | 0.547 | 0.56  | 0.572 | 0.636 | 0.529  |
| 0.353  | 0.885 | 0.855 | 0.848 | 0.753 | 0.804  |
| 0.651  | 0.987 | 0.938 | 0.912 | 0.798 | 0.799  |
| 0.646  | 0.867 | 0.8   | 0.827 | 0.787 | 0.792  |
| 0.68   | 0.863 | 0.857 | 0.864 | 0.765 | 0.7983 |
| 0.264  | 0.648 | 0.749 | 0.845 | 0.742 | 0.723  |
| 0.379  | 0.697 | 0.787 | 0.841 | 0.753 | 0.735  |
| 0.429  | 0.631 | 0.713 | 0.807 | 0.701 | 0.636  |
| 0.439  | 0.627 | 0.744 | 0.799 | 0.707 | 0.68   |
| 0.582  | 0.671 | 0.571 | 0.595 | 0.555 | 0.661  |
| 0.844  | 0.714 | 0.572 | 0.61  | 0.557 | 0.639  |
| 0.834  | 0.708 | 0.553 | 0.606 | 0.565 | 0.656  |
| 0.856  | 0.727 | 0.576 | 0.594 | 0.554 | 0.649  |
| 0.607  | 0.611 | 0.565 | 0.607 | 0.6   | 0.601  |
| 0.609  | 0.613 | 0.565 | 0.599 | 0.602 | 0.599  |
| 0.601  | 0.613 | 0.555 | 0.597 | 0.597 | 0.594  |
| 0.611  | 0.593 | 0.558 | 0.591 | 0.601 | 0.598  |
| 0.506  | 0.496 | 0.566 | 0.605 | 0.582 | 0.562  |
| 0.49   | 0.573 | 0.569 | 0.619 | 0.54  | 0.5727 |
| 0.491  | 0.546 | 0.524 | 0.602 | 0.57  | 0.582  |
| 0.537  | 0.539 | 0.58  | 0.595 | 0.567 | 0.574  |
| 0.5587 | 0.495 | 0.507 | 0.487 | 0.499 | 0.512  |
| 0.56   | 0.541 | 0.535 | 0.523 | 0.513 | 0.557  |
| 0.565  | 0.498 | 0.489 | 0.51  | 0.52  | 0.529  |
| 0.551  | 0.509 | 0.558 | 0.519 | 0.521 | 0.564  |
| 0.602  | 0.726 | 0.685 | 0.652 | 0.684 | 0.707  |
| 0.758  | 0.744 | 0.706 | 0.693 | 0.683 | 0.6877 |
| 0.764  | 0.719 | 0.663 | 0.679 | 0.665 | 0.673  |
| 0.793  | 0.724 | 0.695 | 0.663 | 0.686 | 0.683  |
| 0.055  | 0.094 | 0.09  | 0.094 | 0.092 | 0.096  |
| 0.081  | 0.1   | 0.102 | 0.1   | 0.095 | 0.1    |
| 0.098  | 0.085 | 0.079 | 0.089 | 0.074 | 0.081  |
| 0.092  | 0.085 | 0.091 | 0.088 | 0.085 | 0.077  |
| 0.012  | 0.124 | 0.091 | 0.09  | 0.099 | 0.115  |
| 0.192  | 0.149 | 0.104 | 0.106 | 0.106 | 0.123  |

|        |       |       |       |       |        |
|--------|-------|-------|-------|-------|--------|
| 0.226  | 0.128 | 0.084 | 0.093 | 0.091 | 0.106  |
| 0.226  | 0.11  | 0.097 | 0.092 | 0.094 | 0.099  |
| 0.114  | 0.281 | 0.225 | 0.211 | 0.217 | 0.251  |
| 0.387  | 0.3   | 0.236 | 0.252 | 0.242 | 0.254  |
| 0.403  | 0.264 | 0.194 | 0.201 | 0.205 | 0.218  |
| 0.388  | 0.247 | 0.213 | 0.223 | 0.22  | 0.226  |
| 0.203  | 0.182 | 0.17  | 0.137 | 0.114 | 0.117  |
| 0.294  | 0.22  | 0.189 | 0.114 | 0.145 | 0.113  |
| 0.168  | 0.201 | 0.184 | 0.132 | 0.134 | 0.153  |
| 0.098  | 0.201 | 0.165 | 0.157 | 0.152 | 0.147  |
| 0.45   | 0.426 | 0.432 | 0.431 | 0.421 | 0.409  |
| 0.44   | 0.448 | 0.442 | 0.434 | 0.428 | 0.405  |
| 0.453  | 0.429 | 0.429 | 0.432 | 0.428 | 0.388  |
| 0.457  | 0.436 | 0.441 | 0.419 | 0.421 | 0.396  |
| 0.535  | 0.537 | 0.53  | 0.531 | 0.536 | 0.547  |
| 0.531  | 0.53  | 0.535 | 0.542 | 0.53  | 0.54   |
| 0.524  | 0.548 | 0.548 | 0.546 | 0.549 | 0.544  |
| 0.55   | 0.54  | 0.544 | 0.534 | 0.544 | 0.543  |
| 0.7473 | 0.713 | 0.567 | 0.582 | 0.522 | 0.525  |
| 0.736  | 0.761 | 0.643 | 0.62  | 0.538 | 0.552  |
| 0.723  | 0.744 | 0.596 | 0.614 | 0.536 | 0.513  |
| 0.783  | 0.759 | 0.618 | 0.604 | 0.516 | 0.493  |
| 0.63   | 0.696 | 0.665 | 0.643 | 0.633 | 0.663  |
| 0.742  | 0.682 | 0.663 | 0.637 | 0.632 | 0.668  |
| 0.746  | 0.672 | 0.637 | 0.625 | 0.622 | 0.642  |
| 0.744  | 0.667 | 0.64  | 0.616 | 0.629 | 0.64   |
| 0.032  | 0.091 | 0.076 | 0.071 | 0.067 | 0.097  |
| 0.077  | 0.124 | 0.103 | 0.074 | 0.078 | 0.112  |
| 0.108  | 0.083 | 0.059 | 0.071 | 0.064 | 0.082  |
| 0.097  | 0.086 | 0.087 | 0.08  | 0.07  | 0.079  |
| 0.276  | 0.26  | 0.308 | 0.309 | 0.291 | 0.287  |
| 0.291  | 0.287 | 0.295 | 0.306 | 0.287 | 0.29   |
| 0.279  | 0.277 | 0.305 | 0.307 | 0.277 | 0.2885 |
| 0.354  | 0.345 | 0.299 | 0.313 | 0.285 | 0.2885 |
| 0.543  | 0.517 | 0.509 | 0.502 | 0.485 | 0.526  |
| 0.538  | 0.55  | 0.504 | 0.516 | 0.5   | 0.534  |

|       |       |        |       |       |       |
|-------|-------|--------|-------|-------|-------|
| 0.532 | 0.54  | 0.496  | 0.496 | 0.488 | 0.549 |
| 0.557 | 0.543 | 0.491  | 0.49  | 0.504 | 0.555 |
| 0.398 | 0.383 | 0.407  | 0.422 | 0.38  | 0.39  |
| 0.417 | 0.418 | 0.394  | 0.446 | 0.415 | 0.392 |
| 0.413 | 0.417 | 0.399  | 0.433 | 0.421 | 0.41  |
| 0.427 | 0.405 | 0.4    | 0.419 | 0.419 | 0.455 |
| 0.626 | 0.627 | 0.618  | 0.713 | 0.583 | 0.647 |
| 0.644 | 0.68  | 0.604  | 0.682 | 0.596 | 0.642 |
| 0.696 | 0.766 | 0.67   | 0.702 | 0.672 | 0.739 |
| 0.773 | 0.768 | 0.762  | 0.768 | 0.706 | 0.726 |
| 0.769 | 0.687 | 0.777  | 0.712 | 0.528 | 0.573 |
| 0.676 | 0.737 | 0.719  | 0.703 | 0.581 | 0.569 |
| 0.753 | 0.765 | 0.895  | 0.943 | 0.776 | 0.77  |
| 0.812 | 0.809 | 0.782  | 0.881 | 0.767 | 0.683 |
| 0.716 | 0.576 | 0.69   | 0.688 | 0.553 | 0.567 |
| 0.67  | 0.671 | 0.631  | 0.687 | 0.621 | 0.604 |
| 0.897 | 0.797 | 0.854  | 0.84  | 0.744 | 0.722 |
| 0.66  | 0.875 | 0.687  | 0.753 | 0.673 | 0.631 |
| 0.624 | 0.812 | 0.989  | 0.881 | 0.755 | 0.619 |
| 0.506 | 0.802 | 0.858  | 0.819 | 0.772 | 0.638 |
| 0.545 | 0.848 | 0.98   | 1.001 | 0.761 | 0.608 |
| 0.595 | 0.893 | 0.832  | 0.881 | 0.749 | 0.727 |
| 0.264 | 0.442 | 0.766  | 0.767 | 0.687 | 0.598 |
| 0.273 | 0.469 | 0.708  | 0.715 | 0.785 | 0.613 |
| 0.254 | 0.454 | 0.726  | 0.711 | 0.746 | 0.622 |
| 0.286 | 0.393 | 0.654  | 0.563 | 0.635 | 0.51  |
| 1.011 | 0.787 | 0.658  | 0.699 | 0.656 | 0.67  |
| 0.863 | 0.78  | 0.6363 | 0.689 | 0.656 | 0.68  |
| 0.857 | 0.772 | 0.605  | 0.741 | 0.624 | 0.604 |
| 0.997 | 0.894 | 0.646  | 0.684 | 0.686 | 0.699 |
| 0.741 | 0.682 | 0.73   | 0.739 | 0.689 | 0.679 |
| 0.719 | 0.671 | 0.706  | 0.741 | 0.707 | 0.72  |
| 0.715 | 0.695 | 0.686  | 0.749 | 0.689 | 0.674 |
| 0.703 | 0.643 | 0.66   | 0.684 | 0.662 | 0.659 |
| 0.575 | 0.603 | 0.61   | 0.646 | 0.519 | 0.617 |
| 0.568 | 0.64  | 0.595  | 0.647 | 0.549 | 0.643 |
| 0.806 | 0.933 | 0.701  | 0.85  | 0.803 | 0.942 |
| 0.838 | 0.858 | 0.842  | 0.872 | 0.826 | 0.807 |
| 0.462 | 0.413 | 0.496  | 0.479 | 0.462 | 0.464 |

|        |        |        |       |       |        |
|--------|--------|--------|-------|-------|--------|
| 0.467  | 0.464  | 0.467  | 0.484 | 0.483 | 0.485  |
| 0.485  | 0.504  | 0.484  | 0.487 | 0.528 | 0.531  |
| 0.651  | 0.4603 | 0.4823 | 0.566 | 0.491 | 0.4933 |
| 0.802  | 0.767  | 0.812  | 0.787 | 0.703 | 0.842  |
| 0.794  | 0.879  | 0.804  | 0.811 | 0.734 | 0.775  |
| 0.876  | 0.928  | 0.835  | 0.873 | 0.898 | 0.935  |
| 0.922  | 1.039  | 0.873  | 0.806 | 0.821 | 0.97   |
| 0.095  | 0.103  | 0.114  | 0.113 | 0.105 | 0.117  |
| 0.102  | 0.115  | 0.114  | 0.125 | 0.11  | 0.113  |
| 0.115  | 0.1093 | 0.138  | 0.128 | 0.131 | 0.114  |
| 0.113  | 0.11   | 0.118  | 0.11  | 0.116 | 0.112  |
| 0.272  | 0.126  | 0.11   | 0.101 | 0.089 | 0.107  |
| 0.202  | 0.15   | 0.103  | 0.103 | 0.11  | 0.126  |
| 0.234  | 0.197  | 0.138  | 0.14  | 0.131 | 0.129  |
| 0.483  | 0.223  | 0.153  | 0.136 | 0.158 | 0.169  |
| 0.512  | 0.273  | 0.276  | 0.234 | 0.201 | 0.235  |
| 0.397  | 0.298  | 0.255  | 0.24  | 0.234 | 0.259  |
| 0.545  | 0.386  | 0.261  | 0.3   | 0.285 | 0.287  |
| 0.631  | 0.409  | 0.282  | 0.268 | 0.288 | 0.326  |
| 0.265  | 0.334  | 0.221  | 0.128 | 0.139 | 0.145  |
| 0.265  | 0.058  | 0.141  | 0.136 | 0.174 | 0.137  |
| 0.166  | 0.166  | 0.251  | 0.142 | 0.16  | 0.144  |
| 0.17   | 0.141  | 0.177  | 0.19  | 0.167 | 0.154  |
| 0.454  | 0.45   | 0.458  | 0.471 | 0.437 | 0.42   |
| 0.446  | 0.464  | 0.452  | 0.469 | 0.453 | 0.461  |
| 0.492  | 0.507  | 0.459  | 0.503 | 0.489 | 0.419  |
| 0.513  | 0.515  | 0.469  | 0.474 | 0.496 | 0.455  |
| 0.651  | 0.611  | 0.622  | 0.604 | 0.596 | 0.614  |
| 0.641  | 0.631  | 0.593  | 0.636 | 0.664 | 0.626  |
| 0.648  | 0.649  | 0.611  | 0.597 | 0.601 | 0.625  |
| 0.6467 | 0.6303 | 0.639  | 0.619 | 0.661 | 0.679  |
| 1.056  | 0.974  | 0.872  | 0.756 | 0.731 | 0.722  |
| 0.984  | 1.002  | 0.822  | 0.729 | 0.727 | 0.6897 |
| 0.969  | 0.976  | 0.784  | 0.712 | 0.691 | 0.7    |
| 1.078  | 1.055  | 0.774  | 0.661 | 0.701 | 0.647  |
| 0.957  | 0.764  | 0.767  | 0.759 | 0.715 | 0.756  |
| 0.906  | 0.803  | 0.763  | 0.772 | 0.747 | 0.775  |
| 0.885  | 0.795  | 0.785  | 0.807 | 0.784 | 0.786  |
| 1.094  | 0.892  | 0.797  | 0.833 | 0.868 | 0.856  |

|       |       |       |       |        |        |
|-------|-------|-------|-------|--------|--------|
| 0.072 | 0.068 | 0.077 | 0.07  | 0.059  | 0.058  |
| 0.066 | 0.082 | 0.066 | 0.063 | 0.071  | 0.065  |
| 0.076 | 0.099 | 0.073 | 0.07  | 0.066  | 0.071  |
| 0.085 | 0.083 | 0.076 | 0.08  | 0.0653 | 0.0647 |

|       |       |       |       |       |       |
|-------|-------|-------|-------|-------|-------|
| 0.308 | 0.285 | 0.292 | 0.28  | 0.279 | 0.302 |
| 0.307 | 0.288 | 0.293 | 0.273 | 0.281 | 0.299 |
| 0.312 | 0.285 | 0.291 | 0.286 | 0.285 | 0.3   |
| 0.302 | 0.284 | 0.285 | 0.294 | 0.283 | 0.299 |

|       |       |       |       |       |       |
|-------|-------|-------|-------|-------|-------|
| 0.525 | 0.499 | 0.494 | 0.418 | 0.441 | 0.457 |
| 0.53  | 0.499 | 0.484 | 0.406 | 0.432 | 0.454 |
| 0.517 | 0.512 | 0.488 | 0.424 | 0.449 | 0.46  |
| 0.511 | 0.501 | 0.474 | 0.446 | 0.435 | 0.462 |

|       |       |       |       |       |       |
|-------|-------|-------|-------|-------|-------|
| 0.373 | 0.438 | 0.392 | 0.4   | 0.424 | 0.393 |
| 0.38  | 0.418 | 0.399 | 0.397 | 0.428 | 0.388 |
| 0.376 | 0.421 | 0.387 | 0.405 | 0.414 | 0.387 |
| 0.377 | 0.419 | 0.378 | 0.385 | 0.41  | 0.387 |

|       |       |       |        |       |       |
|-------|-------|-------|--------|-------|-------|
| 0.67  | 0.696 | 0.66  | 0.669  | 0.663 | 0.67  |
| 0.681 | 0.677 | 0.667 | 0.655  | 0.669 | 0.679 |
| 0.661 | 0.69  | 0.669 | 0.6593 | 0.681 | 0.687 |
| 0.665 | 0.709 | 0.653 | 0.654  | 0.643 | 0.673 |

|       |       |       |       |       |       |
|-------|-------|-------|-------|-------|-------|
| 0.745 | 0.896 | 0.813 | 0.817 | 0.733 | 0.767 |
| 0.76  | 0.831 | 0.825 | 0.723 | 0.703 | 0.71  |
| 0.763 | 0.899 | 0.819 | 0.863 | 0.711 | 0.753 |
| 0.706 | 0.848 | 0.788 | 0.727 | 0.65  | 0.657 |

|       |       |       |       |       |       |
|-------|-------|-------|-------|-------|-------|
| 0.631 | 0.744 | 0.724 | 0.672 | 0.689 | 0.64  |
| 0.574 | 0.677 | 0.721 | 0.62  | 0.635 | 0.615 |
| 0.63  | 0.602 | 0.595 | 0.617 | 0.544 | 0.518 |
| 0.607 | 0.73  | 0.678 | 0.678 | 0.641 | 0.478 |

|       |       |       |       |       |       |
|-------|-------|-------|-------|-------|-------|
| 0.444 | 0.718 | 0.889 | 0.845 | 0.752 | 0.776 |
| 0.456 | 0.691 | 0.822 | 0.839 | 0.754 | 0.714 |
| 0.498 | 0.73  | 0.852 | 0.863 | 0.704 | 0.732 |
| 0.459 | 0.72  | 0.78  | 0.793 | 0.726 | 0.694 |

|       |       |       |       |       |       |
|-------|-------|-------|-------|-------|-------|
| 0.278 | 0.445 | 0.652 | 0.705 | 0.696 | 0.653 |
| 0.239 | 0.446 | 0.648 | 0.691 | 0.72  | 0.709 |
| 0.336 | 0.464 | 0.675 | 0.798 | 0.769 | 0.786 |
| 0.298 | 0.475 | 0.661 | 0.765 | 0.779 | 0.737 |

|       |       |       |       |       |       |
|-------|-------|-------|-------|-------|-------|
| 1.048 | 0.754 | 0.716 | 0.637 | 0.652 | 0.693 |
| 1.035 | 0.74  | 0.706 | 0.621 | 0.655 | 0.643 |
| 0.981 | 0.796 | 0.702 | 0.647 | 0.644 | 0.677 |
| 1.019 | 0.759 | 0.67  | 0.674 | 0.649 | 0.652 |
| 0.635 | 0.668 | 0.722 | 0.659 | 0.669 | 0.646 |
| 0.637 | 0.664 | 0.704 | 0.635 | 0.64  | 0.646 |
| 0.652 | 0.658 | 0.699 | 0.655 | 0.643 | 0.647 |
| 0.62  | 0.644 | 0.684 | 0.679 | 0.636 | 0.637 |
| 0.665 | 0.736 | 0.732 | 0.727 | 0.713 | 0.73  |
| 0.694 | 0.721 | 0.747 | 0.659 | 0.694 | 0.727 |
| 0.663 | 0.745 | 0.722 | 0.756 | 0.675 | 0.749 |
| 0.655 | 0.73  | 0.722 | 0.717 | 0.683 | 0.717 |
| 0.584 | 0.565 | 0.616 | 0.579 | 0.597 | 0.584 |
| 0.578 | 0.532 | 0.63  | 0.556 | 0.589 | 0.579 |
| 0.625 | 0.525 | 0.561 | 0.568 | 0.561 | 0.564 |
| 0.571 | 0.525 | 0.574 | 0.595 | 0.53  | 0.535 |
| 0.823 | 0.761 | 0.78  | 0.751 | 0.756 | 0.754 |
| 0.834 | 0.735 | 0.778 | 0.717 | 0.748 | 0.744 |
| 0.826 | 0.762 | 0.773 | 0.782 | 0.728 | 0.739 |
| 0.807 | 0.778 | 0.74  | 0.717 | 0.725 | 0.734 |
| 0.212 | 0.235 | 0.243 | 0.232 | 0.243 | 0.244 |
| 0.209 | 0.236 | 0.249 | 0.217 | 0.24  | 0.243 |
| 0.219 | 0.232 | 0.241 | 0.239 | 0.232 | 0.241 |
| 0.206 | 0.24  | 0.236 | 0.213 | 0.226 | 0.231 |
| 0.157 | 0.127 | 0.101 | 0.098 | 0.123 | 0.151 |
| 0.195 | 0.112 | 0.095 | 0.089 | 0.12  | 0.129 |
| 0.162 | 0.135 | 0.101 | 0.102 | 0.101 | 0.13  |
| 0.172 | 0.118 | 0.097 | 0.096 | 0.101 | 0.122 |
| 0.515 | 0.392 | 0.289 | 0.282 | 0.302 | 0.304 |
| 0.519 | 0.335 | 0.271 | 0.257 | 0.319 | 0.323 |
| 0.492 | 0.399 | 0.289 | 0.288 | 0.283 | 0.337 |
| 0.449 | 0.373 | 0.281 | 0.268 | 0.285 | 0.322 |
| 0.256 | 0.277 | 0.21  | 0.17  | 0.14  | 0.154 |
| 0.343 | 0.259 | 0.201 | 0.182 | 0.161 | 0.152 |
| 0.244 | 0.259 | 0.189 | 0.162 | 0.185 | 0.152 |
| 0.089 | 0.241 | 0.215 | 0.147 | 0.158 | 0.147 |
| 0.462 | 0.463 | 0.476 | 0.477 | 0.457 | 0.442 |
| 0.483 | 0.468 | 0.479 | 0.458 | 0.452 | 0.444 |
| 0.47  | 0.449 | 0.465 | 0.469 | 0.433 | 0.462 |
| 0.448 | 0.452 | 0.456 | 0.487 | 0.441 | 0.46  |

|       |        |       |        |       |       |
|-------|--------|-------|--------|-------|-------|
| 0.589 | 0.576  | 0.571 | 0.56   | 0.573 | 0.56  |
| 0.594 | 0.59   | 0.567 | 0.55   | 0.558 | 0.56  |
| 0.603 | 0.563  | 0.555 | 0.541  | 0.572 | 0.552 |
| 0.594 | 0.572  | 0.546 | 0.582  | 0.559 | 0.571 |
| 0.893 | 0.974  | 0.827 | 0.696  | 0.837 | 0.747 |
| 0.887 | 0.953  | 0.869 | 0.7373 | 0.788 | 0.777 |
| 0.911 | 0.955  | 0.799 | 0.739  | 0.771 | 0.777 |
| 0.862 | 0.964  | 0.796 | 0.777  | 0.795 | 0.759 |
| 0.671 | 0.621  | 0.609 | 0.618  | 0.596 | 0.595 |
| 0.726 | 0.615  | 0.603 | 0.598  | 0.598 | 0.567 |
| 0.666 | 0.612  | 0.645 | 0.659  | 0.632 | 0.629 |
| 0.663 | 0.6    | 0.599 | 0.592  | 0.613 | 0.58  |
| 0.068 | 0.073  | 0.065 | 0.057  | 0.06  | 0.075 |
| 0.082 | 0.068  | 0.064 | 0.0583 | 0.055 | 0.08  |
| 0.068 | 0.0767 | 0.072 | 0.063  | 0.053 | 0.088 |
| 0.078 | 0.089  | 0.066 | 0.055  | 0.051 | 0.092 |
| 0.325 | 0.302  | 0.293 | 0.309  | 0.315 | 0.324 |
| 0.323 | 0.295  | 0.295 | 0.303  | 0.307 | 0.324 |
| 0.29  | 0.31   | 0.295 | 0.308  | 0.309 | 0.33  |
| 0.313 | 0.308  | 0.296 | 0.302  | 0.304 | 0.32  |
| 0.519 | 0.517  | 0.505 | 0.491  | 0.493 | 0.485 |
| 0.502 | 0.487  | 0.486 | 0.486  | 0.475 | 0.497 |
| 0.5   | 0.516  | 0.502 | 0.489  | 0.466 | 0.465 |
| 0.518 | 0.504  | 0.483 | 0.462  | 0.441 | 0.458 |
| 0.371 | 0.327  | 0.343 | 0.372  | 0.376 | 0.383 |
| 0.447 | 0.338  | 0.353 | 0.374  | 0.366 | 0.374 |
| 0.282 | 0.436  | 0.427 | 0.439  | 0.423 | 0.411 |
| 0.402 | 0.406  | 0.386 | 0.414  | 0.413 | 0.42  |
| 0.602 | 0.612  | 0.59  | 0.612  | 0.623 | 0.621 |
| 0.692 | 0.622  | 0.617 | 0.606  | 0.6   | 0.581 |
| 0.563 | 0.722  | 0.692 | 0.684  | 0.683 | 0.666 |
| 0.674 | 0.697  | 0.667 | 0.657  | 0.66  | 0.651 |
| 0.653 | 0.711  | 0.682 | 0.761  | 0.676 | 0.65  |
| 0.715 | 0.728  | 0.653 | 0.726  | 0.582 | 0.6   |
| 0.563 | 0.836  | 0.775 | 0.814  | 0.686 | 0.684 |
| 0.654 | 0.812  | 0.683 | 0.689  | 0.633 | 0.771 |

|        |        |        |        |       |       |
|--------|--------|--------|--------|-------|-------|
| 0.639  | 0.569  | 0.606  | 0.627  | 0.587 | 0.581 |
| 0.78   | 0.601  | 0.617  | 0.655  | 0.582 | 0.571 |
| 0.552  | 0.604  | 0.6277 | 0.636  | 0.688 | 0.692 |
| 0.729  | 0.708  | 0.66   | 0.658  | 0.603 | 0.607 |
| 0.349  | 0.525  | 0.704  | 0.744  | 0.688 | 0.635 |
| 0.426  | 0.546  | 0.728  | 0.67   | 0.553 | 0.498 |
| 0.347  | 0.641  | 0.881  | 0.816  | 0.671 | 0.725 |
| 0.4    | 0.632  | 0.792  | 0.758  | 0.636 | 0.659 |
| 0.241  | 0.374  | 0.686  | 0.757  | 0.8   | 0.79  |
| 0.273  | 0.401  | 0.745  | 0.759  | 0.658 | 0.641 |
| 0.168  | 0.401  | 0.776  | 0.793  | 0.717 | 0.802 |
| 0.312  | 0.442  | 0.651  | 0.731  | 0.622 | 0.655 |
| 0.899  | 0.733  | 0.634  | 0.623  | 0.653 | 0.662 |
| 0.895  | 0.731  | 0.622  | 0.626  | 0.627 | 0.654 |
| 0.928  | 0.71   | 0.62   | 0.607  | 0.615 | 0.629 |
| 0.853  | 0.705  | 0.602  | 0.6187 | 0.615 | 0.633 |
| 0.714  | 0.715  | 0.704  | 0.719  | 0.757 | 0.688 |
| 0.699  | 0.6987 | 0.711  | 0.708  | 0.738 | 0.69  |
| 0.69   | 0.695  | 0.713  | 0.714  | 0.729 | 0.672 |
| 0.681  | 0.686  | 0.695  | 0.69   | 0.72  | 0.672 |
| 0.622  | 0.625  | 0.659  | 0.647  | 0.638 | 0.668 |
| 0.64   | 0.635  | 0.685  | 0.664  | 0.619 | 0.65  |
| 0.6257 | 0.648  | 0.688  | 0.689  | 0.634 | 0.69  |
| 0.615  | 0.624  | 0.647  | 0.643  | 0.63  | 0.664 |
| 0.913  | 0.795  | 0.71   | 0.873  | 0.805 | 0.727 |
| 0.666  | 0.875  | 0.837  | 0.795  | 0.753 | 0.745 |
| 0.829  | 0.645  | 0.717  | 0.719  | 0.634 | 0.674 |
| 0.858  | 0.702  | 0.635  | 0.62   | 0.599 | 0.631 |
| 0.674  | 0.684  | 0.61   | 0.633  | 0.628 | 0.641 |
| 0.785  | 0.676  | 0.602  | 0.6    | 0.615 | 0.625 |
| 0.635  | 0.802  | 0.7    | 0.698  | 0.694 | 0.713 |
| 0.745  | 0.767  | 0.667  | 0.651  | 0.684 | 0.687 |
| 0.193  | 0.198  | 0.209  | 0.212  | 0.206 | 0.211 |
| 0.214  | 0.195  | 0.213  | 0.198  | 0.203 | 0.205 |
| 0.176  | 0.228  | 0.227  | 0.227  | 0.225 | 0.23  |
| 0.205  | 0.217  | 0.219  | 0.21   | 0.22  | 0.217 |
| 0.187  | 0.117  | 0.116  | 0.12   | 0.114 | 0.142 |
| 0.255  | 0.108  | 0.108  | 0.11   | 0.121 | 0.129 |
| 0.106  | 0.178  | 0.114  | 0.107  | 0.117 | 0.151 |

|       |       |       |        |       |       |
|-------|-------|-------|--------|-------|-------|
| 0.202 | 0.143 | 0.104 | 0.099  | 0.118 | 0.131 |
| 0.427 | 0.344 | 0.25  | 0.244  | 0.26  | 0.257 |
| 0.58  | 0.274 | 0.235 | 0.231  | 0.219 | 0.248 |
| 0.316 | 0.417 | 0.306 | 0.278  | 0.287 | 0.32  |
| 0.473 | 0.356 | 0.277 | 0.253  | 0.271 | 0.335 |
| 0.249 | 0.006 | 0.186 | 0.144  | 0.154 | 0.139 |
| 0.447 | 0.29  | 0.161 | 0.162  | 0.156 | 0.156 |
| 0     | 0.139 | 0.237 | 0.185  | 0.193 | 0.189 |
| 0.163 | 0.316 | 0.229 | 0.218  | 0.224 | 0.257 |
| 0.512 | 0.493 | 0.521 | 0.498  | 0.519 | 0.5   |
| 0.494 | 0.491 | 0.515 | 0.475  | 0.477 | 0.449 |
| 0.51  | 0.46  | 0.467 | 0.446  | 0.476 | 0.445 |
| 0.511 | 0.456 | 0.473 | 0.424  | 0.441 | 0.44  |
| 0.625 | 0.628 | 0.616 | 0.6    | 0.58  | 0.608 |
| 0.662 | 0.606 | 0.627 | 0.599  | 0.56  | 0.615 |
| 0.607 | 0.638 | 0.627 | 0.578  | 0.594 | 0.619 |
| 0.632 | 0.625 | 0.617 | 0.582  | 0.546 | 0.618 |
| 0.969 | 0.961 | 0.789 | 0.669  | 0.726 | 0.775 |
| 0.985 | 0.982 | 0.789 | 0.652  | 0.701 | 0.789 |
| 0.885 | 1.002 | 0.793 | 0.672  | 0.679 | 0.8   |
| 0.937 | 0.961 | 0.771 | 0.695  | 0.683 | 0.739 |
| 0.623 | 0.593 | 0.604 | 0.641  | 0.605 | 0.622 |
| 0.684 | 0.57  | 0.604 | 0.592  | 0.543 | 0.573 |
| 0.605 | 0.641 | 0.626 | 0.642  | 0.588 | 0.612 |
| 0.642 | 0.635 | 0.619 | 0.637  | 0.585 | 0.614 |
| 0.06  | 0.073 | 0.064 | 0.065  | 0.061 | 0.078 |
| 0.072 | 0.059 | 0.055 | 0.049  | 0.046 | 0.058 |
| 0.049 | 0.088 | 0.071 | 0.063  | 0.063 | 0.076 |
| 0.074 | 0.077 | 0.063 | 0.053  | 0.049 | 0.059 |
| 0.288 | 0.277 | 0.285 | 0.289  | 0.271 | 0.294 |
| 0.302 | 0.265 | 0.269 | 0.278  | 0.269 | 0.29  |
| 0.279 | 0.302 | 0.306 | 0.2933 | 0.292 | 0.347 |
| 0.309 | 0.3   | 0.296 | 0.313  | 0.303 | 0.328 |
| 0.493 | 0.48  | 0.445 | 0.469  | 0.474 | 0.44  |
| 0.546 | 0.459 | 0.441 | 0.451  | 0.448 | 0.436 |
| 0.487 | 0.53  | 0.502 | 0.553  | 0.482 | 0.496 |

|       |        |       |        |       |       |
|-------|--------|-------|--------|-------|-------|
| 0.536 | 0.498  | 0.48  | 0.503  | 0.489 | 0.491 |
| 0.373 | 0.421  | 0.388 | 0.395  | 0.378 | 0.395 |
| 0.376 | 0.381  | 0.388 | 0.385  | 0.388 | 0.387 |
| 0.361 | 0.384  | 0.401 | 0.4    | 0.405 | 0.386 |
| 0.365 | 0.38   | 0.404 | 0.4    | 0.389 | 0.401 |
| 0.696 | 0.671  | 0.675 | 0.713  | 0.687 | 0.715 |
| 0.679 | 0.665  | 0.668 | 0.686  | 0.692 | 0.715 |
| 0.662 | 0.671  | 0.667 | 0.677  | 0.69  | 0.672 |
| 0.674 | 0.677  | 0.661 | 0.688  | 0.68  | 0.706 |
| 0.608 | 0.892  | 0.747 | 0.6897 | 0.669 | 0.68  |
| 0.605 | 0.746  | 0.669 | 0.713  | 0.69  | 0.667 |
| 0.625 | 0.721  | 0.641 | 0.702  | 0.592 | 0.595 |
| 0.769 | 0.715  | 0.581 | 0.654  | 0.593 | 0.57  |
| 0.638 | 0.6427 | 0.683 | 0.718  | 0.674 | 0.661 |
| 0.636 | 0.621  | 0.601 | 0.596  | 0.667 | 0.661 |
| 0.614 | 0.669  | 0.655 | 0.612  | 0.587 | 0.588 |
| 0.638 | 0.638  | 0.587 | 0.593  | 0.597 | 0.588 |
| 0.393 | 0.865  | 1.065 | 1.121  | 0.853 | 0.875 |
| 0.384 | 0.858  | 0.98  | 0.971  | 0.859 | 0.825 |
| 0.506 | 0.701  | 0.928 | 0.919  | 0.693 | 0.759 |
| 0.404 | 0.718  | 0.797 | 0.865  | 0.732 | 0.708 |
| 0.244 | 0.479  | 0.826 | 0.7687 | 0.819 | 0.821 |
| 0.244 | 0.5    | 0.781 | 0.828  | 0.835 | 0.836 |
| 0.375 | 0.378  | 0.665 | 0.739  | 0.693 | 0.78  |
| 0.272 | 0.379  | 0.624 | 0.739  | 0.738 | 0.781 |
| 0.901 | 0.919  | 0.798 | 0.731  | 0.747 | 0.77  |
| 1.028 | 0.843  | 0.786 | 0.769  | 0.741 | 0.754 |
| 0.904 | 0.862  | 0.88  | 0.837  | 0.744 | 0.8   |
| 1.02  | 0.927  | 0.797 | 0.739  | 0.789 | 0.805 |
| 0.696 | 0.691  | 0.717 | 0.719  | 0.693 | 0.685 |
| 0.778 | 0.662  | 0.715 | 0.683  | 0.679 | 0.682 |
| 0.673 | 0.726  | 0.782 | 0.715  | 0.692 | 0.775 |
| 0.751 | 0.713  | 0.747 | 0.743  | 0.737 | 0.775 |
| 0.536 | 0.623  | 0.624 | 0.5857 | 0.594 | 0.625 |
| 0.527 | 0.566  | 0.594 | 0.571  | 0.594 | 0.633 |
| 0.519 | 0.595  | 0.598 | 0.601  | 0.588 | 0.581 |
| 0.524 | 0.596  | 0.586 | 0.585  | 0.572 | 0.585 |
| 0.607 | 0.55   | 0.536 | 0.62   | 0.661 | 0.649 |
| 0.693 | 0.569  | 0.527 | 0.644  | 0.604 | 0.567 |

|       |        |       |       |        |       |
|-------|--------|-------|-------|--------|-------|
| 0.56  | 0.691  | 0.734 | 0.853 | 0.781  | 0.731 |
| 0.744 | 0.654  | 0.674 | 0.707 | 0.746  | 0.715 |
| 0.739 | 0.709  | 0.755 | 0.748 | 0.704  | 0.751 |
| 0.716 | 0.708  | 0.726 | 0.7   | 0.706  | 0.758 |
| 0.726 | 0.718  | 0.73  | 0.692 | 0.652  | 0.672 |
| 0.715 | 0.701  | 0.691 | 0.694 | 0.674  | 0.708 |
| 0.213 | 0.241  | 0.237 | 0.264 | 0.25   | 0.274 |
| 0.196 | 0.228  | 0.236 | 0.239 | 0.253  | 0.265 |
| 0.213 | 0.221  | 0.23  | 0.24  | 0.233  | 0.23  |
| 0.207 | 0.221  | 0.215 | 0.226 | 0.232  | 0.245 |
| 0.884 | 0.616  | 0.375 | 0.352 | 0.345  | 0.472 |
| 0.775 | 0.506  | 0.357 | 0.32  | 0.376  | 0.51  |
| 0.718 | 0.513  | 0.349 | 0.316 | 0.323  | 0.447 |
| 0.668 | 0.499  | 0.347 | 0.32  | 0.341  | 0.482 |
| 0.454 | 0.395  | 0.316 | 0.323 | 0.292  | 0.328 |
| 0.392 | 0.322  | 0.27  | 0.269 | 0.309  | 0.359 |
| 0.411 | 0.367  | 0.269 | 0.254 | 0.262  | 0.268 |
| 0.402 | 0.309  | 0.262 | 0.252 | 0.26   | 0.281 |
| 0.387 | 0.2755 | 0.252 | 0.252 | 0.278  | 0.259 |
| 0.212 | 0.2755 | 0.272 | 0.228 | 0.287  | 0.213 |
| 0.12  | 0.218  | 0.242 | 0.191 | 0.136  | 0.156 |
| 0.218 | 0.333  | 0.242 | 0.148 | 0.143  | 0.162 |
| 0.452 | 0.473  | 0.478 | 0.46  | 0.445  | 0.489 |
| 0.487 | 0.453  | 0.47  | 0.441 | 0.446  | 0.486 |
| 0.465 | 0.479  | 0.499 | 0.524 | 0.41   | 0.526 |
| 0.483 | 0.466  | 0.481 | 0.464 | 0.4337 | 0.533 |
| 0.577 | 0.544  | 0.529 | 0.578 | 0.594  | 0.602 |
| 0.588 | 0.558  | 0.535 | 0.584 | 0.585  | 0.599 |
| 0.589 | 0.585  | 0.571 | 0.666 | 0.611  | 0.648 |
| 0.619 | 0.589  | 0.566 | 0.61  | 0.615  | 0.639 |
| 0.853 | 0.968  | 0.853 | 0.728 | 0.741  | 0.766 |
| 1.101 | 0.881  | 0.819 | 0.719 | 0.775  | 0.76  |
| 0.839 | 1.077  | 1.001 | 1.076 | 0.897  | 1.008 |
| 0.995 | 1.068  | 0.962 | 0.907 | 0.919  | 0.977 |
| 0.678 | 0.7    | 0.625 | 0.653 | 0.622  | 0.62  |
| 0.661 | 0.671  | 0.615 | 0.608 | 0.635  | 0.607 |
| 0.689 | 0.655  | 0.597 | 0.6   | 0.599  | 0.583 |
| 0.657 | 0.641  | 0.602 | 0.596 | 0.586  | 0.581 |
| 0.057 | 0.102  | 0.093 | 0.09  | 0.084  | 0.161 |

|       |       |       |       |       |       |
|-------|-------|-------|-------|-------|-------|
| 0.054 | 0.074 | 0.068 | 0.055 | 0.086 | 0.165 |
| 0.058 | 0.089 | 0.088 | 0.078 | 0.085 | 0.158 |
| 0.064 | 0.091 | 0.074 | 0.071 | 0.08  | 0.176 |

|       |       |       |       |       |       |
|-------|-------|-------|-------|-------|-------|
| 0.322 | 0.291 | 0.316 | 0.308 | 0.276 | 0.303 |
| 0.34  | 0.3   | 0.293 | 0.32  | 0.293 | 0.321 |
| 0.347 | 0.316 | 0.286 | 0.33  | 0.289 | 0.32  |
| 0.333 | 0.285 | 0.251 | 0.314 | 0.279 | 0.316 |

|       |       |       |       |       |       |
|-------|-------|-------|-------|-------|-------|
| 0.51  | 0.527 | 0.531 | 0.473 | 0.482 | 0.489 |
| 0.543 | 0.561 | 0.503 | 0.505 | 0.52  | 0.529 |
| 0.563 | 0.589 | 0.477 | 0.528 | 0.527 | 0.544 |
| 0.533 | 0.541 | 0.436 | 0.515 | 0.519 | 0.516 |

|       |        |       |       |       |       |
|-------|--------|-------|-------|-------|-------|
| 0.383 | 0.4233 | 0.388 | 0.38  | 0.384 | 0.371 |
| 0.421 | 0.41   | 0.378 | 0.415 | 0.412 | 0.398 |
| 0.433 | 0.43   | 0.341 | 0.42  | 0.417 | 0.418 |
| 0.44  | 0.43   | 0.316 | 0.431 | 0.422 | 0.436 |

|       |        |       |       |       |       |
|-------|--------|-------|-------|-------|-------|
| 0.652 | 0.64   | 0.658 | 0.6   | 0.598 | 0.664 |
| 0.704 | 0.6813 | 0.655 | 0.7   | 0.618 | 0.703 |
| 0.677 | 0.718  | 0.621 | 0.662 | 0.651 | 0.722 |
| 0.688 | 0.686  | 0.539 | 0.69  | 0.644 | 0.716 |

|       |       |       |       |       |       |
|-------|-------|-------|-------|-------|-------|
| 0.714 | 0.732 | 0.703 | 0.724 | 0.613 | 0.629 |
| 0.687 | 0.674 | 0.815 | 0.72  | 0.615 | 0.607 |
| 0.738 | 0.744 | 0.724 | 0.807 | 0.68  | 0.806 |
| 0.841 | 0.795 | 0.645 | 0.852 | 0.747 | 0.73  |

|       |       |       |       |       |       |
|-------|-------|-------|-------|-------|-------|
| 0.64  | 0.623 | 0.728 | 0.579 | 0.534 | 0.574 |
| 0.67  | 0.647 | 0.56  | 0.626 | 0.557 | 0.615 |
| 0.917 | 0.944 | 0.53  | 0.85  | 0.779 | 0.776 |
| 0.731 | 0.597 | 0.529 | 0.657 | 0.574 | 0.555 |

|       |       |        |       |       |       |
|-------|-------|--------|-------|-------|-------|
| 0.463 | 0.765 | 0.859  | 0.747 | 0.71  | 0.746 |
| 0.486 | 0.75  | 0.755  | 0.707 | 0.694 | 0.73  |
| 0.51  | 0.926 | 0.793  | 0.91  | 0.79  | 0.745 |
| 0.505 | 0.812 | 0.8023 | 0.798 | 0.876 | 0.769 |

|       |       |       |       |       |       |
|-------|-------|-------|-------|-------|-------|
| 0.225 | 0.472 | 0.699 | 0.687 | 0.766 | 0.699 |
| 0.294 | 0.463 | 0.612 | 0.73  | 0.803 | 0.74  |
| 0.252 | 0.539 | 0.713 | 0.789 | 0.821 | 0.694 |
| 0.296 | 0.454 | 0.577 | 0.755 | 0.83  | 0.714 |

|       |       |       |       |       |       |
|-------|-------|-------|-------|-------|-------|
| 0.892 | 0.782 | 0.721 | 0.653 | 0.639 | 0.682 |
|-------|-------|-------|-------|-------|-------|

|       |       |        |        |       |        |
|-------|-------|--------|--------|-------|--------|
| 0.928 | 0.784 | 0.63   | 0.668  | 0.65  | 0.696  |
| 1.002 | 0.873 | 0.667  | 0.727  | 0.69  | 0.718  |
| 0.938 | 0.725 | 0.613  | 0.645  | 0.604 | 0.636  |
| 0.737 | 0.694 | 0.721  | 0.654  | 0.734 | 0.738  |
| 0.748 | 0.688 | 0.678  | 0.674  | 0.771 | 0.756  |
| 0.801 | 0.694 | 0.698  | 0.723  | 0.781 | 0.741  |
| 0.721 | 0.658 | 0.653  | 0.664  | 0.721 | 0.718  |
| 0.694 | 0.658 | 0.67   | 0.655  | 0.604 | 0.696  |
| 0.646 | 0.617 | 0.685  | 0.659  | 0.611 | 0.672  |
| 0.657 | 0.616 | 0.689  | 0.666  | 0.609 | 0.675  |
| 0.663 | 0.608 | 0.6813 | 0.661  | 0.62  | 0.705  |
| 0.467 | 0.428 | 0.515  | 0.416  | 0.404 | 0.437  |
| 0.484 | 0.427 | 0.487  | 0.436  | 0.434 | 0.469  |
| 0.53  | 0.506 | 0.424  | 0.493  | 0.464 | 0.549  |
| 0.512 | 0.453 | 0.426  | 0.47   | 0.432 | 0.539  |
| 0.893 | 0.824 | 0.875  | 0.782  | 0.812 | 0.86   |
| 0.943 | 0.837 | 0.859  | 0.86   | 0.851 | 0.886  |
| 0.913 | 0.931 | 0.803  | 0.79   | 0.88  | 0.94   |
| 0.935 | 0.908 | 0.8457 | 0.898  | 0.819 | 0.975  |
| 0.196 | 0.229 | 0.26   | 0.231  | 0.237 | 0.213  |
| 0.209 | 0.23  | 0.246  | 0.25   | 0.245 | 0.229  |
| 0.216 | 0.255 | 0.24   | 0.254  | 0.247 | 0.243  |
| 0.219 | 0.245 | 0.204  | 0.269  | 0.235 | 0.255  |
| 0.164 | 0.132 | 0.126  | 0.089  | 0.094 | 0.109  |
| 0.194 | 0.142 | 0.13   | 0.103  | 0.107 | 0.123  |
| 0.331 | 0.188 | 0.091  | 0.116  | 0.111 | 0.124  |
| 0.25  | 0.162 | 0.06   | 0.124  | 0.123 | 0.1187 |
| 0.455 | 0.359 | 0.299  | 0.265  | 0.266 | 0.272  |
| 0.459 | 0.368 | 0.273  | 0.273  | 0.276 | 0.314  |
| 0.467 | 0.44  | 0.275  | 0.286  | 0.294 | 0.315  |
| 0.505 | 0.373 | 0.191  | 0.309  | 0.293 | 0.352  |
| 0.352 | 0.284 | 0.36   | 0.208  | 0.215 | 0.226  |
| 0.379 | 0.235 | 0.217  | 0.216  | 0.227 | 0.219  |
| 0.294 | 0.331 | 0.2513 | 0.212  | 0.205 | 0.184  |
| 0.198 | 0.306 | 0.177  | 0.189  | 0.22  | 0.176  |
| 0.525 | 0.497 | 0.481  | 0.488  | 0.497 | 0.502  |
| 0.508 | 0.478 | 0.483  | 0.4887 | 0.487 | 0.489  |
| 0.52  | 0.496 | 0.474  | 0.499  | 0.485 | 0.5    |
| 0.507 | 0.476 | 0.4793 | 0.479  | 0.479 | 0.499  |

|       |       |       |       |       |       |
|-------|-------|-------|-------|-------|-------|
| 0.619 | 0.626 | 0.633 | 0.598 | 0.584 | 0.609 |
| 0.658 | 0.641 | 0.614 | 0.638 | 0.62  | 0.643 |
| 0.655 | 0.657 | 0.586 | 0.62  | 0.599 | 0.636 |
| 0.627 | 0.616 | 0.611 | 0.611 | 0.606 | 0.647 |
| 1.164 | 1.162 | 0.955 | 0.836 | 0.862 | 0.837 |
| 1.206 | 1.169 | 0.916 | 0.889 | 0.902 | 0.959 |
| 1.226 | 1.228 | 0.893 | 0.895 | 0.902 | 0.929 |
| 1.133 | 1.055 | 0.708 | 0.853 | 0.819 | 0.921 |
| 0.791 | 0.748 | 0.743 | 0.69  | 0.705 | 0.683 |
| 0.845 | 0.753 | 0.699 | 0.731 | 0.731 | 0.694 |
| 0.884 | 0.813 | 0.655 | 0.761 | 0.771 | 0.751 |
| 0.919 | 0.775 | 0.615 | 0.791 | 0.789 | 0.728 |
| 0.068 | 0.106 | 0.089 | 0.063 | 0.063 | 0.08  |
| 0.104 | 0.115 | 0.073 | 0.087 | 0.084 | 0.106 |
| 0.089 | 0.138 | 0.066 | 0.09  | 0.074 | 0.094 |
| 0.1   | 0.096 | 0.046 | 0.093 | 0.083 | 0.105 |
| 0.278 | 0.276 | 0.283 | 0.273 | 0.263 | 0.268 |
| 0.285 | 0.275 | 0.296 | 0.281 | 0.264 | 0.268 |
| 0.271 | 0.278 | 0.3   | 0.292 | 0.267 | 0.28  |
| 0.282 | 0.277 | 0.298 | 0.285 | 0.272 | 0.271 |
| 0.521 | 0.494 | 0.45  | 0.408 | 0.456 | 0.428 |
| 0.54  | 0.478 | 0.457 | 0.417 | 0.461 | 0.441 |
| 0.487 | 0.515 | 0.493 | 0.436 | 0.455 | 0.435 |
| 0.532 | 0.525 | 0.476 | 0.431 | 0.462 | 0.433 |
| 0.394 | 0.286 | 0.31  | 0.333 | 0.353 | 0.358 |
| 0.43  | 0.291 | 0.316 | 0.342 | 0.355 | 0.375 |
| 0.289 | 0.381 | 0.395 | 0.387 | 0.387 | 0.363 |
| 0.395 | 0.372 | 0.375 | 0.387 | 0.37  | 0.36  |
| 0.606 | 0.563 | 0.532 | 0.562 | 0.606 | 0.599 |
| 0.642 | 0.556 | 0.568 | 0.622 | 0.605 | 0.594 |
| 0.529 | 0.638 | 0.65  | 0.679 | 0.632 | 0.595 |
| 0.637 | 0.643 | 0.627 | 0.638 | 0.64  | 0.613 |
| 0.578 | 0.748 | 0.657 | 0.639 | 0.623 | 0.668 |
| 0.672 | 0.753 | 0.665 | 0.758 | 0.657 | 0.626 |
| 0.552 | 0.773 | 0.734 | 0.758 | 0.672 | 0.635 |
| 0.668 | 0.766 | 0.667 | 0.695 | 0.661 | 0.607 |

|        |        |        |        |       |       |
|--------|--------|--------|--------|-------|-------|
| 0.549  | 0.589  | 0.6173 | 0.592  | 0.503 | 0.571 |
| 0.5723 | 0.588  | 0.6    | 0.655  | 0.572 | 0.594 |
| 0.528  | 0.601  | 0.627  | 0.643  | 0.579 | 0.563 |
| 0.64   | 0.625  | 0.625  | 0.638  | 0.581 | 0.557 |
| 0.317  | 0.594  | 0.518  | 0.603  | 0.512 | 0.57  |
| 0.424  | 0.615  | 0.629  | 0.664  | 0.549 | 0.538 |
| 0.376  | 0.583  | 0.715  | 0.662  | 0.613 | 0.657 |
| 0.431  | 0.639  | 0.731  | 0.698  | 0.58  | 0.576 |
| 0.252  | 0.467  | 0.601  | 0.701  | 0.663 | 0.76  |
| 0.371  | 0.449  | 0.644  | 0.744  | 0.631 | 0.612 |
| 0.255  | 0.445  | 0.714  | 0.766  | 0.715 | 0.774 |
| 0.343  | 0.508  | 0.716  | 0.764  | 0.623 | 0.621 |
| 0.819  | 0.719  | 0.54   | 0.558  | 0.624 | 0.629 |
| 0.955  | 0.719  | 0.59   | 0.598  | 0.64  | 0.662 |
| 0.883  | 0.734  | 0.638  | 0.589  | 0.629 | 0.667 |
| 0.889  | 0.734  | 0.612  | 0.594  | 0.633 | 0.66  |
| 0.725  | 0.712  | 0.668  | 0.618  | 0.695 | 0.65  |
| 0.737  | 0.686  | 0.68   | 0.685  | 0.717 | 0.659 |
| 0.735  | 0.695  | 0.71   | 0.644  | 0.709 | 0.652 |
| 0.733  | 0.696  | 0.691  | 0.633  | 0.715 | 0.646 |
| 0.611  | 0.652  | 0.6593 | 0.638  | 0.593 | 0.663 |
| 0.654  | 0.652  | 0.651  | 0.694  | 0.615 | 0.687 |
| 0.587  | 0.653  | 0.676  | 0.6733 | 0.666 | 0.705 |
| 0.596  | 0.665  | 0.651  | 0.688  | 0.662 | 0.67  |
| 0.729  | 0.7683 | 0.768  | 0.817  | 0.784 | 0.766 |
| 0.644  | 0.889  | 0.803  | 0.864  | 0.709 | 0.709 |
| 0.778  | 0.71   | 0.726  | 0.669  | 0.609 | 0.589 |
| 0.749  | 0.706  | 0.658  | 0.72   | 0.603 | 0.569 |
| 0.628  | 0.61   | 0.56   | 0.581  | 0.571 | 0.647 |
| 0.711  | 0.599  | 0.595  | 0.59   | 0.591 | 0.656 |
| 0.608  | 0.677  | 0.684  | 0.673  | 0.626 | 0.671 |
| 0.683  | 0.658  | 0.656  | 0.64   | 0.618 | 0.668 |
| 0.195  | 0.202  | 0.182  | 0.196  | 0.2   | 0.236 |
| 0.212  | 0.199  | 0.204  | 0.217  | 0.202 | 0.234 |
| 0.179  | 0.211  | 0.217  | 0.241  | 0.216 | 0.229 |
| 0.197  | 0.209  | 0.213  | 0.218  | 0.218 | 0.224 |
| 0.465  | 0.281  | 0.189  | 0.196  | 0.219 | 0.259 |
| 0.549  | 0.279  | 0.216  | 0.213  | 0.222 | 0.271 |
| 0.373  | 0.348  | 0.257  | 0.246  | 0.25  | 0.295 |
| 0.498  | 0.347  | 0.258  | 0.24   | 0.243 | 0.295 |

|       |        |        |        |        |       |
|-------|--------|--------|--------|--------|-------|
| 0.376 | 0.298  | 0.173  | 0.203  | 0.215  | 0.274 |
| 0.479 | 0.27   | 0.234  | 0.253  | 0.261  | 0.261 |
| 0.307 | 0.302  | 0.272  | 0.244  | 0.244  | 0.265 |
| 0.373 | 0.289  | 0.235  | 0.227  | 0.234  | 0.257 |
| 0.179 | 0.1635 | 0.178  | 0.117  | 0.127  | 0.113 |
| 0.15  | 0.176  | 0.147  | 0.122  | 0.133  | 0.133 |
| 0.15  | 0.151  | 0.181  | 0.165  | 0.156  | 0.162 |
| 0.121 | 0.1635 | 0.195  | 0.153  | 0.171  | 0.18  |
| 0.438 | 0.43   | 0.458  | 0.457  | 0.451  | 0.458 |
| 0.461 | 0.419  | 0.482  | 0.468  | 0.451  | 0.458 |
| 0.418 | 0.427  | 0.494  | 0.478  | 0.451  | 0.453 |
| 0.449 | 0.427  | 0.48   | 0.469  | 0.451  | 0.453 |
| 0.582 | 0.622  | 0.535  | 0.578  | 0.557  | 0.582 |
| 0.596 | 0.623  | 0.566  | 0.584  | 0.568  | 0.604 |
| 0.6   | 0.619  | 0.559  | 0.56   | 0.55   | 0.59  |
| 0.604 | 0.597  | 0.555  | 0.581  | 0.567  | 0.601 |
| 0.846 | 0.781  | 0.648  | 0.557  | 0.597  | 0.671 |
| 0.964 | 0.795  | 0.733  | 0.62   | 0.619  | 0.714 |
| 0.768 | 0.86   | 0.83   | 0.68   | 0.683  | 0.735 |
| 0.866 | 0.868  | 0.79   | 0.703  | 0.679  | 0.721 |
| 0.687 | 0.639  | 0.6317 | 0.62   | 0.6107 | 0.637 |
| 0.732 | 0.663  | 0.629  | 0.627  | 0.619  | 0.635 |
| 0.673 | 0.657  | 0.64   | 0.6227 | 0.604  | 0.618 |
| 0.729 | 0.661  | 0.626  | 0.621  | 0.609  | 0.614 |
| 0.062 | 0.072  | 0.052  | 0.05   | 0.048  | 0.078 |
| 0.078 | 0.069  | 0.055  | 0.06   | 0.05   | 0.08  |
| 0.059 | 0.085  | 0.088  | 0.078  | 0.06   | 0.074 |
| 0.078 | 0.086  | 0.065  | 0.065  | 0.056  | 0.067 |
| 0.259 | 0.252  | 0.264  | 0.257  | 0.262  | 0.282 |
| 0.261 | 0.248  | 0.268  | 0.268  | 0.272  | 0.278 |
| 0.263 | 0.255  | 0.265  | 0.257  | 0.263  | 0.277 |
| 0.283 | 0.259  | 0.262  | 0.253  | 0.262  | 0.273 |
| 0.491 | 0.454  | 0.425  | 0.412  | 0.411  | 0.402 |
| 0.521 | 0.448  | 0.433  | 0.43   | 0.409  | 0.394 |
| 0.508 | 0.457  | 0.432  | 0.444  | 0.417  | 0.407 |
| 0.53  | 0.477  | 0.43   | 0.4287 | 0.409  | 0.405 |

|       |       |       |        |       |       |
|-------|-------|-------|--------|-------|-------|
| 0.422 | 0.397 | 0.394 | 0.403  | 0.399 | 0.42  |
| 0.421 | 0.406 | 0.399 | 0.41   | 0.391 | 0.434 |
| 0.429 | 0.423 | 0.399 | 0.421  | 0.403 | 0.429 |
| 0.443 | 0.416 | 0.405 | 0.4113 | 0.425 | 0.433 |
| 0.646 | 0.691 | 0.659 | 0.672  | 0.619 | 0.721 |
| 0.668 | 0.695 | 0.669 | 0.733  | 0.624 | 0.712 |
| 0.71  | 0.673 | 0.624 | 0.75   | 0.638 | 0.659 |
| 0.748 | 0.675 | 0.676 | 0.799  | 0.714 | 0.687 |
| 0.653 | 0.73  | 0.681 | 0.751  | 0.688 | 0.638 |
| 0.656 | 0.67  | 0.683 | 0.733  | 0.659 | 0.687 |
| 0.691 | 0.743 | 0.633 | 0.743  | 0.682 | 0.628 |
| 0.674 | 0.732 | 0.645 | 0.718  | 0.68  | 0.644 |
| 0.604 | 0.651 | 0.638 | 0.649  | 0.563 | 0.604 |
| 0.612 | 0.59  | 0.644 | 0.666  | 0.588 | 0.616 |
| 0.63  | 0.629 | 0.591 | 0.678  | 0.611 | 0.61  |
| 0.685 | 0.653 | 0.616 | 0.6643 | 0.626 | 0.617 |
| 0.657 | 0.897 | 0.92  | 0.927  | 0.854 | 0.826 |
| 0.656 | 0.827 | 0.982 | 0.97   | 0.802 | 0.942 |
| 0.724 | 0.906 | 0.823 | 0.961  | 0.81  | 0.9   |
| 0.717 | 0.886 | 0.913 | 1.005  | 0.889 | 0.913 |
| 0.382 | 0.575 | 0.832 | 0.871  | 0.825 | 0.834 |
| 0.374 | 0.556 | 0.88  | 0.948  | 0.821 | 0.915 |
| 0.455 | 0.58  | 0.8   | 0.923  | 0.854 | 0.884 |
| 0.443 | 0.602 | 0.823 | 1.002  | 0.92  | 0.92  |
| 0.875 | 0.68  | 0.593 | 0.584  | 0.579 | 0.62  |
| 0.904 | 0.655 | 0.576 | 0.586  | 0.572 | 0.625 |
| 0.896 | 0.71  | 0.598 | 0.601  | 0.587 | 0.627 |
| 0.919 | 0.717 | 0.61  | 0.587  | 0.589 | 0.638 |
| 0.582 | 0.621 | 0.608 | 0.598  | 0.599 | 0.594 |
| 0.595 | 0.615 | 0.598 | 0.602  | 0.598 | 0.596 |
| 0.586 | 0.628 | 0.612 | 0.607  | 0.616 | 0.595 |
| 0.607 | 0.648 | 0.615 | 0.601  | 0.609 | 0.604 |
| 0.576 | 0.691 | 0.69  | 0.788  | 0.661 | 0.751 |
| 0.624 | 0.682 | 0.703 | 0.771  | 0.679 | 0.758 |
| 0.609 | 0.682 | 0.685 | 0.8    | 0.677 | 0.722 |
| 0.622 | 0.708 | 0.693 | 0.677  | 0.651 | 0.7   |
| 0.449 | 0.438 | 0.461 | 0.505  | 0.446 | 0.482 |
| 0.469 | 0.447 | 0.459 | 0.519  | 0.465 | 0.505 |
| 0.477 | 0.465 | 0.46  | 0.529  | 0.461 | 0.489 |

|       |       |        |        |       |       |
|-------|-------|--------|--------|-------|-------|
| 0.495 | 0.488 | 0.461  | 0.517  | 0.472 | 0.5   |
| 0.683 | 0.719 | 0.707  | 0.71   | 0.668 | 0.697 |
| 0.708 | 0.713 | 0.701  | 0.706  | 0.692 | 0.723 |
| 0.716 | 0.748 | 0.722  | 0.739  | 0.7   | 0.709 |
| 0.732 | 0.759 | 0.727  | 0.773  | 0.733 | 0.739 |
| 0.207 | 0.222 | 0.237  | 0.249  | 0.238 | 0.239 |
| 0.214 | 0.231 | 0.248  | 0.251  | 0.245 | 0.243 |
| 0.219 | 0.228 | 0.238  | 0.256  | 0.248 | 0.235 |
| 0.221 | 0.236 | 0.242  | 0.255  | 0.251 | 0.246 |
| 0.291 | 0.17  | 0.116  | 0.109  | 0.117 | 0.144 |
| 0.301 | 0.172 | 0.124  | 0.126  | 0.134 | 0.159 |
| 0.336 | 0.179 | 0.117  | 0.113  | 0.119 | 0.138 |
| 0.361 | 0.193 | 0.124  | 0.135  | 0.139 | 0.159 |
| 0.536 | 0.343 | 0.268  | 0.247  | 0.271 | 0.31  |
| 0.522 | 0.346 | 0.281  | 0.287  | 0.278 | 0.325 |
| 0.577 | 0.359 | 0.269  | 0.262  | 0.275 | 0.297 |
| 0.35  | 0.351 | 0.266  | 0.2653 | 0.314 | 0.322 |
| 0.306 | 0.143 | 0.175  | 0.141  | 0.145 | 0.122 |
| 0.42  | 0.312 | 0.165  | 0.135  | 0.132 | 0.129 |
| 0.127 | 0.1   | 0.182  | 0.134  | 0.14  | 0.144 |
| 0.06  | 0.352 | 0.207  | 0.1367 | 0.139 | 0.162 |
| 0.398 | 0.413 | 0.4345 | 0.417  | 0.416 | 0.461 |
| 0.407 | 0.41  | 0.4345 | 0.447  | 0.425 | 0.468 |
| 0.418 | 0.422 | 0.432  | 0.431  | 0.436 | 0.486 |
| 0.433 | 0.441 | 0.437  | 0.452  | 0.439 | 0.493 |
| 0.52  | 0.503 | 0.532  | 0.514  | 0.541 | 0.529 |
| 0.537 | 0.504 | 0.54   | 0.522  | 0.531 | 0.528 |
| 0.534 | 0.514 | 0.543  | 0.532  | 0.559 | 0.548 |
| 0.551 | 0.523 | 0.551  | 0.528  | 0.558 | 0.555 |
| 0.709 | 0.722 | 0.644  | 0.562  | 0.552 | 0.595 |
| 0.778 | 0.765 | 0.648  | 0.609  | 0.564 | 0.623 |
| 0.786 | 0.747 | 0.677  | 0.658  | 0.608 | 0.648 |
| 0.793 | 0.801 | 0.683  | 0.661  | 0.622 | 0.654 |
| 0.677 | 0.632 | 0.607  | 0.626  | 0.644 | 0.597 |
| 0.681 | 0.634 | 0.601  | 0.625  | 0.639 | 0.609 |
| 0.692 | 0.664 | 0.608  | 0.64   | 0.608 | 0.627 |
| 0.693 | 0.649 | 0.602  | 0.666  | 0.625 | 0.63  |
| 0.071 | 0.108 | 0.103  | 0.086  | 0.101 | 0.104 |
| 0.08  | 0.102 | 0.127  | 0.115  | 0.096 | 0.126 |

|       |       |       |       |       |       |
|-------|-------|-------|-------|-------|-------|
| 0.112 | 0.098 | 0.087 | 0.088 | 0.088 | 0.114 |
| 0.122 | 0.117 | 0.108 | 0.113 | 0.12  | 0.132 |
|       |       |       |       |       |       |
| 0.301 | 0.3   | 0.317 | 0.324 | 0.312 | 0.325 |
| 0.288 | 0.304 | 0.323 | 0.328 | 0.315 | 0.317 |
| 0.313 | 0.274 | 0.288 | 0.296 | 0.281 | 0.28  |
| 0.291 | 0.273 | 0.287 | 0.283 | 0.281 | 0.282 |
|       |       |       |       |       |       |
| 0.509 | 0.49  | 0.461 | 0.461 | 0.468 | 0.46  |
| 0.482 | 0.476 | 0.465 | 0.467 | 0.458 | 0.452 |
| 0.523 | 0.435 | 0.424 | 0.438 | 0.444 | 0.428 |
| 0.501 | 0.444 | 0.419 | 0.417 | 0.42  | 0.434 |
|       |       |       |       |       |       |
| 0.35  | 0.373 | 0.36  | 0.36  | 0.37  | 0.368 |
| 0.379 | 0.364 | 0.354 | 0.36  | 0.374 | 0.39  |
| 0.361 | 0.401 | 0.384 | 0.405 | 0.411 | 0.407 |
| 0.394 | 0.401 | 0.387 | 0.408 | 0.408 | 0.42  |
|       |       |       |       |       |       |
| 0.646 | 0.652 | 0.647 | 0.691 | 0.645 | 0.637 |
| 0.678 | 0.656 | 0.64  | 0.684 | 0.655 | 0.658 |
| 0.635 | 0.696 | 0.692 | 0.778 | 0.714 | 0.692 |
| 0.716 | 0.709 | 0.688 | 0.743 | 0.713 | 0.688 |
|       |       |       |       |       |       |
| 0.623 | 0.735 | 0.632 | 0.757 | 0.596 | 0.613 |
| 0.647 | 0.703 | 0.652 | 0.734 | 0.595 | 0.61  |
| 0.609 | 0.707 | 0.666 | 0.762 | 0.637 | 0.678 |
| 0.69  | 0.723 | 0.687 | 0.764 | 0.597 | 0.626 |
|       |       |       |       |       |       |
| 0.614 | 0.525 | 0.511 | 0.511 | 0.498 | 0.514 |
| 0.553 | 0.535 | 0.537 | 0.529 | 0.474 | 0.494 |
| 0.507 | 0.567 | 0.593 | 0.621 | 0.58  | 0.574 |
| 0.64  | 0.574 | 0.554 | 0.589 | 0.539 | 0.555 |
|       |       |       |       |       |       |
| 0.4   | 0.689 | 0.786 | 0.846 | 0.711 | 0.682 |
| 0.434 | 0.744 | 0.866 | 0.847 | 0.735 | 0.653 |
| 0.444 | 0.71  | 0.913 | 0.924 | 0.86  | 0.826 |
| 0.518 | 0.762 | 0.848 | 0.901 | 0.787 | 0.737 |
|       |       |       |       |       |       |
| 0.224 | 0.412 | 0.72  | 0.819 | 0.764 | 0.767 |
| 0.26  | 0.456 | 0.777 | 0.797 | 0.758 | 0.822 |
| 0.268 | 0.465 | 0.846 | 0.931 | 0.94  | 0.875 |
| 0.314 | 0.517 | 0.852 | 0.921 | 0.887 | 0.847 |
|       |       |       |       |       |       |
| 0.961 | 0.84  | 0.682 | 0.698 | 0.657 | 0.749 |
| 0.852 | 0.865 | 0.691 | 0.707 | 0.677 | 0.769 |

|        |       |       |       |        |       |
|--------|-------|-------|-------|--------|-------|
| 0.928  | 0.743 | 0.626 | 0.628 | 0.609  | 0.722 |
| 0.879  | 0.76  | 0.638 | 0.639 | 0.587  | 0.7   |
| 0.657  | 0.631 | 0.64  | 0.649 | 0.638  | 0.643 |
| 0.624  | 0.64  | 0.642 | 0.647 | 0.644  | 0.659 |
| 0.67   | 0.582 | 0.603 | 0.614 | 0.613  | 0.623 |
| 0.616  | 0.605 | 0.617 | 0.605 | 0.605  | 0.611 |
| 0.558  | 0.657 | 0.662 | 0.715 | 0.678  | 0.7   |
| 0.572  | 0.691 | 0.681 | 0.694 | 0.657  | 0.708 |
| 0.552  | 0.666 | 0.664 | 0.702 | 0.68   | 0.711 |
| 0.587  | 0.676 | 0.687 | 0.693 | 0.677  | 0.696 |
| 0.535  | 0.593 | 0.587 | 0.626 | 0.607  | 0.616 |
| 0.503  | 0.567 | 0.576 | 0.607 | 0.605  | 0.639 |
| 0.584  | 0.502 | 0.493 | 0.523 | 0.527  | 0.546 |
| 0.511  | 0.502 | 0.511 | 0.531 | 0.516  | 0.537 |
| 0.6725 | 0.659 | 0.647 | 0.611 | 0.621  | 0.677 |
| 0.681  | 0.683 | 0.669 | 0.628 | 0.622  | 0.688 |
| 0.664  | 0.695 | 0.719 | 0.708 | 0.708  | 0.706 |
| 0.6725 | 0.75  | 0.736 | 0.692 | 0.702  | 0.749 |
| 0.206  | 0.223 | 0.239 | 0.245 | 0.263  | 0.261 |
| 0.224  | 0.247 | 0.251 | 0.246 | 0.266  | 0.26  |
| 0.198  | 0.249 | 0.251 | 0.263 | 0.258  | 0.269 |
| 0.229  | 0.25  | 0.258 | 0.261 | 0.266  | 0.267 |
| 0.278  | 0.183 | 0.12  | 0.117 | 0.121  | 0.147 |
| 0.304  | 0.188 | 0.13  | 0.12  | 0.131  | 0.161 |
| 0.278  | 0.21  | 0.145 | 0.133 | 0.142  | 0.177 |
| 0.387  | 0.201 | 0.139 | 0.131 | 0.153  | 0.182 |
| 0.513  | 0.355 | 0.277 | 0.264 | 0.271  | 0.296 |
| 0.589  | 0.349 | 0.263 | 0.258 | 0.278  | 0.316 |
| 0.474  | 0.406 | 0.303 | 0.301 | 0.319  | 0.367 |
| 0.387  | 0.373 | 0.287 | 0.312 | 0.33   | 0.37  |
| 0.375  | 0.156 | 0.195 | 0.159 | 0.161  | 0.144 |
| 0.313  | 0.275 | 0.181 | 0.147 | 0.1537 | 0.149 |
| 0.134  | 0.137 | 0.188 | 0.138 | 0.147  | 0.155 |
| 0.087  | 0.368 | 0.213 | 0.143 | 0.153  | 0.148 |
| 0.432  | 0.495 | 0.473 | 0.459 | 0.449  | 0.473 |
| 0.435  | 0.482 | 0.47  | 0.458 | 0.461  | 0.486 |
| 0.479  | 0.424 | 0.429 | 0.437 | 0.433  | 0.453 |
| 0.426  | 0.433 | 0.453 | 0.43  | 0.426  | 0.458 |
| 0.556  | 0.606 | 0.606 | 0.545 | 0.587  | 0.562 |

|       |       |       |       |       |        |
|-------|-------|-------|-------|-------|--------|
| 0.519 | 0.608 | 0.608 | 0.547 | 0.585 | 0.561  |
| 0.551 | 0.578 | 0.585 | 0.521 | 0.565 | 0.535  |
| 0.535 | 0.567 | 0.572 | 0.519 | 0.561 | 0.537  |
| 0.926 | 0.971 | 0.851 | 0.734 | 0.763 | 0.784  |
| 0.838 | 0.99  | 0.863 | 0.757 | 0.767 | 0.831  |
| 0.915 | 0.86  | 0.751 | 0.67  | 0.679 | 0.716  |
| 0.858 | 0.888 | 0.752 | 0.683 | 0.681 | 0.745  |
| 0.637 | 0.579 | 0.625 | 0.576 | 0.579 | 0.567  |
| 0.63  | 0.568 | 0.615 | 0.58  | 0.595 | 0.586  |
| 0.625 | 0.593 | 0.65  | 0.614 | 0.629 | 0.629  |
| 0.663 | 0.607 | 0.653 | 0.629 | 0.619 | 0.618  |
| 0.065 | 0.077 | 0.073 | 0.066 | 0.068 | 0.073  |
| 0.087 | 0.085 | 0.079 | 0.067 | 0.068 | 0.1033 |
| 0.067 | 0.091 | 0.106 | 0.092 | 0.09  | 0.119  |
| 0.1   | 0.108 | 0.098 | 0.082 | 0.089 | 0.118  |
| 0.257 | 0.266 | 0.251 | 0.278 | 0.29  | 0.277  |
| 0.284 | 0.295 | 0.289 | 0.282 | 0.284 | 0.277  |
| 0.298 | 0.28  | 0.265 | 0.265 | 0.285 | 0.271  |
| 0.287 | 0.273 | 0.28  | 0.281 | 0.283 | 0.268  |
| 0.473 | 0.437 | 0.399 | 0.42  | 0.447 | 0.418  |
| 0.502 | 0.443 | 0.449 | 0.435 | 0.433 | 0.426  |
| 0.496 | 0.418 | 0.413 | 0.419 | 0.441 | 0.422  |
| 0.485 | 0.413 | 0.418 | 0.422 | 0.453 | 0.436  |
| 0.394 | 0.396 | 0.377 | 0.395 | 0.409 | 0.397  |
| 0.386 | 0.397 | 0.404 | 0.417 | 0.397 | 0.425  |
| 0.41  | 0.392 | 0.377 | 0.382 | 0.377 | 0.373  |
| 0.41  | 0.376 | 0.381 | 0.393 | 0.377 | 0.379  |
| 0.649 | 0.702 | 0.6   | 0.657 | 0.641 | 0.656  |
| 0.677 | 0.709 | 0.637 | 0.689 | 0.624 | 0.68   |
| 0.674 | 0.686 | 0.599 | 0.642 | 0.606 | 0.623  |
| 0.652 | 0.673 | 0.611 | 0.656 | 0.61  | 0.661  |
| 0.71  | 0.756 | 0.699 | 0.708 | 0.674 | 0.604  |
| 0.651 | 0.749 | 0.752 | 0.779 | 0.589 | 0.762  |
| 0.711 | 0.768 | 0.684 | 0.67  | 0.602 | 0.694  |
| 0.69  | 0.751 | 0.774 | 0.751 | 0.643 | 0.646  |
| 0.592 | 0.646 | 0.584 | 0.57  | 0.578 | 0.581  |

|       |       |        |       |       |        |
|-------|-------|--------|-------|-------|--------|
| 0.544 | 0.623 | 0.609  | 0.621 | 0.508 | 0.587  |
| 0.598 | 0.611 | 0.562  | 0.544 | 0.496 | 0.598  |
| 0.57  | 0.549 | 0.568  | 0.567 | 0.518 | 0.516  |
| 0.411 | 0.822 | 0.885  | 0.839 | 0.751 | 0.727  |
| 0.409 | 0.756 | 0.932  | 0.889 | 0.702 | 0.826  |
| 0.444 | 0.717 | 0.807  | 0.774 | 0.696 | 0.704  |
| 0.463 | 0.691 | 0.888  | 0.856 | 0.756 | 0.748  |
| 0.23  | 0.463 | 0.703  | 0.777 | 0.743 | 0.692  |
| 0.203 | 0.443 | 0.735  | 0.769 | 0.748 | 0.757  |
| 0.252 | 0.43  | 0.636  | 0.732 | 0.66  | 0.627  |
| 0.259 | 0.412 | 0.675  | 0.73  | 0.738 | 0.691  |
| 0.933 | 0.878 | 0.658  | 0.651 | 0.666 | 0.668  |
| 0.892 | 0.814 | 0.651  | 0.661 | 0.64  | 0.664  |
| 0.893 | 0.845 | 0.665  | 0.64  | 0.639 | 0.645  |
| 0.949 | 0.786 | 0.653  | 0.667 | 0.65  | 0.653  |
| 0.621 | 0.636 | 0.616  | 0.645 | 0.658 | 0.651  |
| 0.633 | 0.631 | 0.641  | 0.658 | 0.648 | 0.634  |
| 0.631 | 0.62  | 0.624  | 0.643 | 0.637 | 0.626  |
| 0.629 | 0.629 | 0.631  | 0.653 | 0.641 | 0.648  |
| 0.504 | 0.642 | 0.6127 | 0.606 | 0.625 | 0.7    |
| 0.544 | 0.653 | 0.62   | 0.683 | 0.592 | 0.723  |
| 0.579 | 0.63  | 0.591  | 0.65  | 0.603 | 0.65   |
| 0.569 | 0.626 | 0.627  | 0.671 | 0.619 | 0.658  |
| 0.503 | 0.529 | 0.497  | 0.496 | 0.526 | 0.522  |
| 0.552 | 0.506 | 0.558  | 0.544 | 0.533 | 0.593  |
| 0.569 | 0.511 | 0.534  | 0.508 | 0.527 | 0.539  |
| 0.549 | 0.52  | 0.563  | 0.553 | 0.564 | 0.598  |
| 0.851 | 0.871 | 0.743  | 0.79  | 0.831 | 0.858  |
| 0.866 | 0.887 | 0.813  | 0.858 | 0.844 | 0.9    |
| 0.893 | 0.892 | 0.782  | 0.806 | 0.794 | 0.79   |
| 0.913 | 0.882 | 0.814  | 0.813 | 0.834 | 0.843  |
| 0.192 | 0.213 | 0.206  | 0.224 | 0.221 | 0.245  |
| 0.196 | 0.218 | 0.233  | 0.244 | 0.224 | 0.26   |
| 0.216 | 0.202 | 0.201  | 0.221 | 0.204 | 0.224  |
| 0.205 | 0.2   | 0.214  | 0.226 | 0.21  | 0.228  |
| 0.667 | 0.417 | 0.282  | 0.264 | 0.315 | 0.343  |
| 0.664 | 0.412 | 0.318  | 0.298 | 0.316 | 0.3293 |
| 0.77  | 0.379 | 0.295  | 0.26  | 0.277 | 0.32   |
| 0.752 | 0.362 | 0.29   | 0.281 | 0.303 | 0.325  |

|       |       |       |       |       |        |
|-------|-------|-------|-------|-------|--------|
| 0.33  | 0.298 | 0.213 | 0.212 | 0.233 | 0.24   |
| 0.31  | 0.274 | 0.255 | 0.239 | 0.223 | 0.2287 |
| 0.373 | 0.264 | 0.213 | 0.187 | 0.199 | 0.214  |
| 0.331 | 0.235 | 0.218 | 0.224 | 0.226 | 0.232  |
| 0.283 | 0.105 | 0.227 | 0.139 | 0.122 | 0.149  |
| 0.302 | 0.311 | 0.196 | 0.149 | 0.147 | 0.12   |
| 0.092 | 0.163 | 0.227 | 0.172 | 0.167 | 0.174  |
| 0.137 | 0.327 | 0.214 | 0.194 | 0.164 | 0.166  |
| 0.409 | 0.413 | 0.405 | 0.427 | 0.429 | 0.454  |
| 0.437 | 0.44  | 0.446 | 0.449 | 0.439 | 0.447  |
| 0.439 | 0.429 | 0.431 | 0.43  | 0.416 | 0.435  |
| 0.446 | 0.41  | 0.429 | 0.422 | 0.423 | 0.446  |
| 0.584 | 0.54  | 0.553 | 0.527 | 0.559 | 0.56   |
| 0.585 | 0.534 | 0.558 | 0.531 | 0.564 | 0.549  |
| 0.569 | 0.539 | 0.578 | 0.542 | 0.574 | 0.56   |
| 0.598 | 0.538 | 0.563 | 0.54  | 0.561 | 0.542  |
| 0.811 | 0.882 | 0.733 | 0.66  | 0.699 | 0.712  |
| 0.832 | 0.881 | 0.872 | 0.733 | 0.707 | 0.7    |
| 0.868 | 0.911 | 0.805 | 0.712 | 0.687 | 0.68   |
| 0.912 | 0.866 | 0.811 | 0.718 | 0.706 | 0.708  |
| 0.731 | 0.64  | 0.582 | 0.613 | 0.614 | 0.589  |
| 0.68  | 0.601 | 0.563 | 0.602 | 0.597 | 0.602  |
| 0.69  | 0.6   | 0.556 | 0.589 | 0.592 | 0.573  |
| 0.681 | 0.585 | 0.544 | 0.58  | 0.584 | 0.576  |
| 0.051 | 0.077 | 0.05  | 0.038 | 0.058 | 0.076  |
| 0.056 | 0.091 | 0.082 | 0.073 | 0.068 | 0.11   |
| 0.094 | 0.068 | 0.056 | 0.052 | 0.058 | 0.067  |
| 0.075 | 0.069 | 0.067 | 0.054 | 0.065 | 0.089  |
| 0.294 | 0.268 | 0.283 | 0.277 | 0.259 | 0.297  |
| 0.289 | 0.274 | 0.27  | 0.257 | 0.259 | 0.295  |
| 0.297 | 0.271 | 0.276 | 0.281 | 0.274 | 0.313  |
| 0.3   | 0.299 | 0.276 | 0.294 | 0.261 | 0.288  |
| 0.487 | 0.459 | 0.417 | 0.452 | 0.429 | 0.424  |
| 0.494 | 0.458 | 0.444 | 0.417 | 0.421 | 0.43   |
| 0.494 | 0.459 | 0.41  | 0.444 | 0.423 | 0.43   |
| 0.49  | 0.471 | 0.408 | 0.452 | 0.427 | 0.428  |

|       |        |       |        |        |       |
|-------|--------|-------|--------|--------|-------|
| 0.369 | 0.376  | 0.402 | 0.39   | 0.384  | 0.381 |
| 0.376 | 0.389  | 0.398 | 0.357  | 0.375  | 0.384 |
| 0.4   | 0.371  | 0.389 | 0.363  | 0.37   | 0.366 |
| 0.381 | 0.371  | 0.384 | 0.375  | 0.365  | 0.371 |
| 0.66  | 0.651  | 0.611 | 0.66   | 0.704  | 0.666 |
| 0.637 | 0.698  | 0.607 | 0.601  | 0.639  | 0.672 |
| 0.649 | 0.62   | 0.594 | 0.628  | 0.627  | 0.643 |
| 0.65  | 0.646  | 0.595 | 0.658  | 0.623  | 0.642 |
| 0.779 | 0.836  | 0.776 | 0.6933 | 0.69   | 0.691 |
| 0.695 | 0.791  | 0.66  | 0.679  | 0.684  | 0.676 |
| 0.756 | 0.77   | 0.692 | 0.7    | 0.645  | 0.609 |
| 0.715 | 0.811  | 0.732 | 0.701  | 0.59   | 0.596 |
| 0.564 | 0.577  | 0.542 | 0.567  | 0.54   | 0.57  |
| 0.508 | 0.542  | 0.471 | 0.543  | 0.533  | 0.575 |
| 0.559 | 0.522  | 0.485 | 0.496  | 0.501  | 0.52  |
| 0.513 | 0.548  | 0.496 | 0.518  | 0.484  | 0.503 |
| 0.439 | 0.698  | 0.862 | 0.829  | 0.74   | 0.7   |
| 0.4   | 0.647  | 0.734 | 0.622  | 0.764  | 0.721 |
| 0.475 | 0.628  | 0.713 | 0.702  | 0.697  | 0.641 |
| 0.422 | 0.665  | 0.763 | 0.752  | 0.651  | 0.617 |
| 0.202 | 0.423  | 0.718 | 0.823  | 0.793  | 0.759 |
| 0.181 | 0.423  | 0.705 | 0.755  | 0.791  | 0.782 |
| 0.227 | 0.398  | 0.623 | 0.706  | 0.722  | 0.688 |
| 0.211 | 0.406  | 0.669 | 0.786  | 0.712  | 0.668 |
| 1.039 | 0.776  | 0.654 | 0.645  | 0.634  | 0.639 |
| 0.989 | 0.762  | 0.608 | 0.641  | 0.64   | 0.638 |
| 1.003 | 0.755  | 0.659 | 0.645  | 0.651  | 0.638 |
| 0.991 | 0.764  | 0.666 | 0.633  | 0.6417 | 0.637 |
| 0.666 | 0.651  | 0.606 | 0.609  | 0.649  | 0.615 |
| 0.651 | 0.657  | 0.597 | 0.559  | 0.633  | 0.617 |
| 0.665 | 0.673  | 0.597 | 0.608  | 0.643  | 0.612 |
| 0.651 | 0.684  | 0.601 | 0.625  | 0.637  | 0.614 |
| 0.518 | 0.58   | 0.582 | 0.647  | 0.614  | 0.648 |
| 0.499 | 0.587  | 0.536 | 0.64   | 0.587  | 0.642 |
| 0.494 | 0.556  | 0.581 | 0.625  | 0.6    | 0.624 |
| 0.512 | 0.607  | 0.601 | 0.648  | 0.584  | 0.591 |
| 0.573 | 0.5637 | 0.57  | 0.578  | 0.578  | 0.618 |
| 0.571 | 0.55   | 0.56  | 0.5767 | 0.559  | 0.62  |
| 0.584 | 0.563  | 0.563 | 0.558  | 0.557  | 0.566 |
| 0.606 | 0.578  | 0.567 | 0.594  | 0.56   | 0.559 |

|       |       |       |        |        |       |
|-------|-------|-------|--------|--------|-------|
| 0.774 | 0.751 | 0.723 | 0.716  | 0.728  | 0.766 |
| 0.776 | 0.786 | 0.72  | 0.7137 | 0.73   | 0.771 |
| 0.764 | 0.766 | 0.727 | 0.697  | 0.718  | 0.774 |
| 0.778 | 0.793 | 0.714 | 0.728  | 0.711  | 0.774 |
| 0.199 | 0.21  | 0.243 | 0.234  | 0.24   | 0.241 |
| 0.195 | 0.22  | 0.235 | 0.2287 | 0.24   | 0.251 |
| 0.201 | 0.203 | 0.233 | 0.22   | 0.225  | 0.218 |
| 0.186 | 0.209 | 0.228 | 0.232  | 0.232  | 0.225 |
| 0.799 | 0.476 | 0.3   | 0.268  | 0.286  | 0.331 |
| 0.712 | 0.411 | 0.271 | 0.2583 | 0.302  | 0.346 |
| 0.85  | 0.434 | 0.28  | 0.242  | 0.268  | 0.31  |
| 0.754 | 0.41  | 0.289 | 0.265  | 0.276  | 0.3   |
| 0.362 | 0.279 | 0.223 | 0.221  | 0.226  | 0.242 |
| 0.3   | 0.262 | 0.207 | 0.192  | 0.242  | 0.255 |
| 0.339 | 0.243 | 0.203 | 0.194  | 0.212  | 0.221 |
| 0.313 | 0.261 | 0.202 | 0.215  | 0.209  | 0.213 |
| 0.317 | 0.098 | 0.165 | 0.155  | 0.136  | 0.149 |
| 0.31  | 0.359 | 0.231 | 0.15   | 0.1523 | 0.122 |
| 0.079 | 0.138 | 0.2   | 0.161  | 0.166  | 0.156 |
| 0.116 | 0.312 | 0.264 | 0.164  | 0.155  | 0.155 |
| 0.431 | 0.426 | 0.427 | 0.423  | 0.461  | 0.477 |
| 0.428 | 0.428 | 0.411 | 0.408  | 0.437  | 0.481 |
| 0.428 | 0.427 | 0.426 | 0.418  | 0.425  | 0.475 |
| 0.425 | 0.427 | 0.421 | 0.46   | 0.457  | 0.467 |
| 0.57  | 0.575 | 0.54  | 0.524  | 0.535  | 0.546 |
| 0.575 | 0.561 | 0.525 | 0.519  | 0.533  | 0.544 |
| 0.553 | 0.57  | 0.546 | 0.525  | 0.548  | 0.547 |
| 0.563 | 0.575 | 0.532 | 0.535  | 0.537  | 0.554 |
| 1     | 0.918 | 0.872 | 0.699  | 0.737  | 0.768 |
| 0.929 | 0.966 | 0.81  | 0.634  | 0.761  | 0.796 |
| 0.997 | 0.966 | 0.903 | 0.764  | 0.731  | 0.751 |
| 1.002 | 0.801 | 0.912 | 0.809  | 0.728  | 0.731 |
| 0.759 | 0.657 | 0.596 | 0.576  | 0.597  | 0.579 |
| 0.728 | 0.65  | 0.591 | 0.562  | 0.598  | 0.572 |
| 0.771 | 0.627 | 0.574 | 0.551  | 0.595  | 0.576 |
| 0.736 | 0.633 | 0.589 | 0.559  | 0.572  | 0.552 |
| 0.065 | 0.071 | 0.062 | 0.051  | 0.056  | 0.076 |
| 0.055 | 0.087 | 0.056 | 0.04   | 0.059  | 0.086 |
| 0.071 | 0.067 | 0.054 | 0.042  | 0.048  | 0.062 |

|       |        |        |       |       |        |
|-------|--------|--------|-------|-------|--------|
| 0.071 | 0.075  | 0.062  | 0.06  | 0.052 | 0.062  |
| 0.321 | 0.303  | 0.265  | 0.31  | 0.301 | 0.294  |
| 0.294 | 0.347  | 0.321  | 0.353 | 0.365 | 0.357  |
| 0.322 | 0.285  | 0.279  | 0.301 | 0.277 | 0.284  |
| 0.349 | 0.325  | 0.296  | 0.327 | 0.315 | 0.339  |
| 0.52  | 0.5733 | 0.476  | 0.489 | 0.497 | 0.488  |
| 0.513 | 0.611  | 0.475  | 0.549 | 0.581 | 0.591  |
| 0.571 | 0.554  | 0.466  | 0.495 | 0.468 | 0.52   |
| 0.586 | 0.555  | 0.494  | 0.521 | 0.503 | 0.523  |
| 0.395 | 0.427  | 0.378  | 0.411 | 0.427 | 0.408  |
| 0.361 | 0.401  | 0.353  | 0.397 | 0.392 | 0.403  |
| 0.437 | 0.43   | 0.391  | 0.419 | 0.368 | 0.43   |
| 0.392 | 0.364  | 0.372  | 0.405 | 0.379 | 0.397  |
| 0.63  | 0.703  | 0.719  | 0.673 | 0.658 | 0.608  |
| 0.559 | 0.656  | 0.673  | 0.699 | 0.611 | 0.676  |
| 0.703 | 0.725  | 0.645  | 0.691 | 0.604 | 0.672  |
| 0.767 | 0.74   | 0.615  | 0.722 | 0.685 | 0.748  |
| 0.723 | 0.761  | 0.865  | 0.656 | 0.574 | 0.635  |
| 0.566 | 0.702  | 0.636  | 0.634 | 0.554 | 0.571  |
| 0.826 | 0.938  | 0.776  | 0.769 | 0.631 | 0.806  |
| 0.756 | 0.857  | 0.537  | 0.779 | 0.655 | 0.798  |
| 0.655 | 0.613  | 0.625  | 0.627 | 0.597 | 0.62   |
| 0.563 | 0.607  | 0.6377 | 0.615 | 0.574 | 0.623  |
| 0.619 | 0.586  | 0.671  | 0.568 | 0.515 | 0.562  |
| 0.546 | 0.602  | 0.617  | 0.564 | 0.553 | 0.6017 |
| 0.392 | 0.675  | 0.889  | 0.833 | 0.793 | 0.73   |
| 0.247 | 0.528  | 0.71   | 0.732 | 0.477 | 0.588  |
| 0.342 | 0.713  | 0.939  | 0.818 | 0.599 | 0.741  |
| 0.313 | 0.592  | 0.591  | 0.808 | 0.683 | 0.696  |
| 0.183 | 0.355  | 0.532  | 0.724 | 0.715 | 0.672  |
| 0.174 | 0.323  | 0.378  | 0.7   | 0.601 | 0.628  |
| 0.177 | 0.328  | 0.671  | 0.655 | 0.5   | 0.601  |
| 0.165 | 0.213  | 0.545  | 0.555 | 0.445 | 0.418  |
| 0.881 | 0.752  | 0.652  | 0.676 | 0.709 | 0.682  |
| 0.715 | 0.889  | 0.74   | 0.762 | 0.724 | 0.786  |
| 0.833 | 0.756  | 0.661  | 0.656 | 0.623 | 0.653  |

|        |        |        |        |        |        |
|--------|--------|--------|--------|--------|--------|
| 0.815  | 0.781  | 0.641  | 0.658  | 0.643  | 0.681  |
| 0.663  | 0.719  | 0.698  | 0.708  | 0.706  | 0.709  |
| 0.674  | 0.6877 | 0.669  | 0.7107 | 0.6947 | 0.7223 |
| 0.682  | 0.669  | 0.692  | 0.699  | 0.675  | 0.73   |
| 0.693  | 0.675  | 0.712  | 0.725  | 0.703  | 0.728  |
| 0.54   | 0.625  | 0.732  | 0.532  | 0.548  | 0.56   |
| 0.452  | 0.602  | 0.742  | 0.55   | 0.475  | 0.564  |
| 0.642  | 0.705  | 0.552  | 0.587  | 0.538  | 0.679  |
| 0.767  | 0.784  | 0.521  | 0.744  | 0.724  | 0.808  |
| 0.457  | 0.364  | 0.493  | 0.492  | 0.365  | 0.422  |
| 0.463  | 0.559  | 0.489  | 0.583  | 0.548  | 0.581  |
| 0.491  | 0.451  | 0.47   | 0.468  | 0.389  | 0.482  |
| 0.593  | 0.539  | 0.504  | 0.564  | 0.494  | 0.637  |
| 0.782  | 0.902  | 0.844  | 0.818  | 0.766  | 0.772  |
| 0.8137 | 0.845  | 0.823  | 0.799  | 0.74   | 0.838  |
| 0.837  | 0.928  | 0.747  | 0.783  | 0.71   | 0.917  |
| 0.822  | 0.858  | 0.705  | 0.812  | 0.773  | 0.874  |
| 0.199  | 0.245  | 0.217  | 0.241  | 0.247  | 0.24   |
| 0.172  | 0.219  | 0.2205 | 0.238  | 0.227  | 0.249  |
| 0.192  | 0.209  | 0.224  | 0.231  | 0.201  | 0.24   |
| 0.174  | 0.18   | 0.2205 | 0.194  | 0.194  | 0.243  |
| 1.157  | 0.742  | 0.523  | 0.381  | 0.41   | 0.52   |
| 0.564  | 0.744  | 0.562  | 0.379  | 0.362  | 0.465  |
| 1.214  | 0.853  | 0.421  | 0.5    | 0.455  | 0.525  |
| 0.967  | 0.751  | 0.37   | 0.482  | 0.462  | 0.561  |
| 0.37   | 0.341  | 0.276  | 0.242  | 0.268  | 0.245  |
| 0.156  | 0.24   | 0.233  | 0.216  | 0.206  | 0.238  |
| 0.405  | 0.341  | 0.25   | 0.25   | 0.214  | 0.279  |
| 0.347  | 0.276  | 0.194  | 0.239  | 0.235  | 0.278  |
| 0.455  | 0.2703 | 0.212  | 0.212  | 0.182  | 0.214  |
| 0.362  | 0.143  | 0.315  | 0.166  | 0.144  | 0.16   |
| 0.261  | 0.278  | 0.17   | 0.156  | 0.165  | 0.167  |
| 0.251  | 0.39   | 0.211  | 0.156  | 0.182  | 0.196  |
| 0.429  | 0.527  | 0.443  | 0.456  | 0.467  | 0.448  |
| 0.418  | 0.562  | 0.499  | 0.536  | 0.494  | 0.538  |
| 0.454  | 0.505  | 0.44   | 0.47   | 0.424  | 0.454  |
| 0.467  | 0.519  | 0.454  | 0.486  | 0.465  | 0.508  |
| 0.615  | 0.656  | 0.588  | 0.626  | 0.625  | 0.598  |
| 0.596  | 0.696  | 0.686  | 0.715  | 0.71   | 0.692  |

|       |        |       |       |       |        |
|-------|--------|-------|-------|-------|--------|
| 0.634 | 0.63   | 0.579 | 0.605 | 0.544 | 0.597  |
| 0.682 | 0.709  | 0.583 | 0.653 | 0.611 | 0.66   |
| 1.009 | 1.201  | 0.91  | 0.901 | 0.868 | 0.891  |
| 0.83  | 1.1337 | 0.93  | 0.888 | 1.073 | 1.182  |
| 1.019 | 1.135  | 0.895 | 0.828 | 0.738 | 0.895  |
| 1.032 | 1.065  | 0.979 | 0.935 | 0.801 | 0.938  |
| 0.906 | 0.857  | 0.754 | 0.743 | 0.764 | 0.791  |
| 0.793 | 0.819  | 0.775 | 0.709 | 0.7   | 0.76   |
| 0.89  | 0.847  | 0.74  | 0.739 | 0.671 | 0.802  |
| 0.845 | 0.843  | 0.662 | 0.739 | 0.724 | 0.816  |
| 0.071 | 0.1023 | 0.085 | 0.076 | 0.087 | 0.104  |
| 0.045 | 0.103  | 0.08  | 0.072 | 0.069 | 0.106  |
| 0.076 | 0.109  | 0.085 | 0.085 | 0.063 | 0.104  |
| 0.078 | 0.095  | 0.059 | 0.086 | 0.074 | 0.149  |
| 0.28  | 0.276  | 0.269 | 0.276 | 0.277 | 0.279  |
| 0.302 | 0.286  | 0.279 | 0.273 | 0.294 | 0.293  |
| 0.3   | 0.283  | 0.299 | 0.279 | 0.28  | 0.306  |
| 0.303 | 0.3    | 0.299 | 0.301 | 0.304 | 0.298  |
| 0.478 | 0.477  | 0.446 | 0.435 | 0.445 | 0.45   |
| 0.532 | 0.491  | 0.452 | 0.443 | 0.445 | 0.437  |
| 0.523 | 0.467  | 0.455 | 0.459 | 0.469 | 0.478  |
| 0.508 | 0.477  | 0.46  | 0.461 | 0.493 | 0.457  |
| 0.371 | 0.356  | 0.362 | 0.388 | 0.381 | 0.372  |
| 0.371 | 0.368  | 0.366 | 0.385 | 0.372 | 0.369  |
| 0.383 | 0.355  | 0.366 | 0.379 | 0.375 | 0.3767 |
| 0.374 | 0.371  | 0.379 | 0.389 | 0.374 | 0.389  |
| 0.647 | 0.676  | 0.663 | 0.718 | 0.651 | 0.649  |
| 0.627 | 0.691  | 0.668 | 0.721 | 0.662 | 0.657  |
| 0.676 | 0.656  | 0.649 | 0.707 | 0.648 | 0.637  |
| 0.646 | 0.698  | 0.672 | 0.712 | 0.676 | 0.655  |
| 0.616 | 0.732  | 0.684 | 0.742 | 0.629 | 0.6235 |
| 0.572 | 0.797  | 0.699 | 0.656 | 0.655 | 0.616  |
| 0.658 | 0.654  | 0.658 | 0.596 | 0.609 | 0.6235 |
| 0.619 | 0.777  | 0.785 | 0.649 | 0.643 | 0.631  |
| 0.478 | 0.505  | 0.487 | 0.542 | 0.492 | 0.509  |
| 0.445 | 0.491  | 0.521 | 0.516 | 0.477 | 0.476  |

|       |       |       |       |       |       |
|-------|-------|-------|-------|-------|-------|
| 0.476 | 0.482 | 0.498 | 0.505 | 0.577 | 0.446 |
| 0.484 | 0.486 | 0.496 | 0.518 | 0.481 | 0.453 |
| 0.361 | 0.736 | 0.832 | 0.934 | 0.743 | 0.788 |
| 0.366 | 0.848 | 0.908 | 0.806 | 0.768 | 0.817 |
| 0.433 | 0.657 | 0.837 | 0.826 | 0.793 | 0.763 |
| 0.458 | 0.705 | 0.881 | 0.924 | 0.813 | 0.808 |
| 0.312 | 0.494 | 0.722 | 0.926 | 0.855 | 1.05  |
| 0.26  | 0.576 | 0.812 | 0.861 | 0.929 | 0.979 |
| 0.306 | 0.455 | 0.796 | 0.883 | 0.871 | 0.92  |
| 0.343 | 0.485 | 0.775 | 0.892 | 0.903 | 1.004 |
| 0.871 | 0.741 | 0.704 | 0.647 | 0.594 | 0.754 |
| 0.911 | 0.737 | 0.704 | 0.648 | 0.605 | 0.744 |
| 0.867 | 0.722 | 0.725 | 0.659 | 0.648 | 0.759 |
| 0.958 | 0.818 | 0.769 | 0.7   | 0.644 | 0.771 |
| 0.628 | 0.625 | 0.591 | 0.616 | 0.632 | 0.635 |
| 0.632 | 0.644 | 0.603 | 0.615 | 0.622 | 0.621 |
| 0.623 | 0.634 | 0.596 | 0.618 | 0.636 | 0.62  |
| 0.634 | 0.64  | 0.598 | 0.614 | 0.621 | 0.629 |
| 0.523 | 0.611 | 0.627 | 0.678 | 0.594 | 0.634 |
| 0.582 | 0.643 | 0.606 | 0.628 | 0.648 | 0.643 |
| 0.595 | 0.632 | 0.623 | 0.641 | 0.61  | 0.613 |
| 0.57  | 0.664 | 0.652 | 0.674 | 0.693 | 0.643 |
| 0.584 | 0.582 | 0.585 | 0.589 | 0.553 | 0.56  |
| 0.659 | 0.594 | 0.583 | 0.575 | 0.59  | 0.573 |
| 0.651 | 0.574 | 0.591 | 0.568 | 0.578 | 0.598 |
| 0.627 | 0.61  | 0.62  | 0.612 | 0.622 | 0.53  |
| 0.838 | 0.809 | 0.792 | 0.823 | 0.838 | 0.862 |
| 0.883 | 0.857 | 0.813 | 0.825 | 0.881 | 0.883 |
| 0.84  | 0.871 | 0.861 | 0.837 | 0.872 | 0.89  |
| 0.921 | 0.931 | 0.894 | 0.883 | 0.913 | 0.894 |
| 0.19  | 0.241 | 0.23  | 0.25  | 0.242 | 0.269 |
| 0.201 | 0.244 | 0.241 | 0.248 | 0.251 | 0.263 |
| 0.217 | 0.224 | 0.223 | 0.246 | 0.225 | 0.262 |
| 0.203 | 0.25  | 0.253 | 0.254 | 0.253 | 0.266 |
| 0.711 | 0.443 | 0.304 | 0.275 | 0.294 | 0.397 |
| 0.72  | 0.4   | 0.306 | 0.27  | 0.321 | 0.384 |
| 0.829 | 0.444 | 0.309 | 0.26  | 0.285 | 0.374 |
| 0.78  | 0.392 | 0.316 | 0.283 | 0.321 | 0.38  |
| 0.95  | 0.757 | 0.55  | 0.545 | 0.544 | 0.628 |

|        |        |       |        |       |        |
|--------|--------|-------|--------|-------|--------|
| 0.743  | 0.799  | 0.577 | 0.536  | 0.579 | 0.616  |
| 0.851  | 0.703  | 0.548 | 0.502  | 0.521 | 0.585  |
| 0.845  | 0.638  | 0.562 | 0.526  | 0.551 | 0.612  |
| 0.292  | 0.089  | 0.171 | 0.156  | 0.144 | 0.155  |
| 0.229  | 0.302  | 0.214 | 0.14   | 0.134 | 0.1457 |
| 0.092  | 0.141  | 0.157 | 0.176  | 0.145 | 0.148  |
| 0.149  | 0.282  | 0.19  | 0.141  | 0.144 | 0.134  |
| 0.453  | 0.4593 | 0.454 | 0.453  | 0.452 | 0.497  |
| 0.459  | 0.458  | 0.447 | 0.459  | 0.461 | 0.49   |
| 0.454  | 0.456  | 0.47  | 0.478  | 0.436 | 0.492  |
| 0.473  | 0.464  | 0.467 | 0.477  | 0.475 | 0.502  |
| 0.581  | 0.554  | 0.557 | 0.517  | 0.569 | 0.586  |
| 0.598  | 0.537  | 0.559 | 0.529  | 0.547 | 0.562  |
| 0.567  | 0.554  | 0.577 | 0.552  | 0.543 | 0.585  |
| 0.598  | 0.556  | 0.559 | 0.525  | 0.568 | 0.57   |
| 1.021  | 0.918  | 0.848 | 0.735  | 0.768 | 0.832  |
| 1.054  | 0.96   | 0.844 | 0.703  | 0.83  | 0.848  |
| 1.058  | 1.005  | 0.949 | 0.835  | 0.846 | 0.873  |
| 1.093  | 0.866  | 0.948 | 0.883  | 0.88  | 0.893  |
| 0.668  | 0.6    | 0.547 | 0.568  | 0.583 | 0.59   |
| 0.638  | 0.636  | 0.575 | 0.554  | 0.581 | 0.6    |
| 0.662  | 0.616  | 0.558 | 0.546  | 0.565 | 0.575  |
| 0.665  | 0.614  | 0.557 | 0.552  | 0.567 | 0.577  |
| 0.065  | 0.078  | 0.077 | 0.065  | 0.061 | 0.091  |
| 0.0947 | 0.115  | 0.078 | 0.077  | 0.097 | 0.115  |
| 0.108  | 0.082  | 0.084 | 0.068  | 0.067 | 0.095  |
| 0.111  | 0.122  | 0.121 | 0.109  | 0.112 | 0.135  |
| 0.253  | 0.267  | 0.269 | 0.272  | 0.271 | 0.273  |
| 0.261  | 0.259  | 0.259 | 0.258  | 0.274 | 0.273  |
| 0.251  | 0.264  | 0.267 | 0.266  | 0.283 | 0.284  |
| 0.264  | 0.266  | 0.266 | 0.2653 | 0.263 | 0.262  |
| 0.421  | 0.454  | 0.421 | 0.399  | 0.394 | 0.423  |
| 0.443  | 0.453  | 0.408 | 0.385  | 0.401 | 0.443  |
| 0.435  | 0.451  | 0.412 | 0.389  | 0.408 | 0.429  |
| 0.433  | 0.448  | 0.417 | 0.396  | 0.39  | 0.42   |
| 0.377  | 0.406  | 0.369 | 0.3827 | 0.362 | 0.387  |

|       |       |       |       |       |       |
|-------|-------|-------|-------|-------|-------|
| 0.388 | 0.42  | 0.378 | 0.376 | 0.371 | 0.377 |
| 0.411 | 0.38  | 0.379 | 0.383 | 0.36  | 0.375 |
| 0.409 | 0.385 | 0.374 | 0.389 | 0.341 | 0.369 |
| 0.675 | 0.702 | 0.7   | 0.717 | 0.692 | 0.727 |
| 0.704 | 0.714 | 0.698 | 0.691 | 0.685 | 0.717 |
| 0.669 | 0.7   | 0.706 | 0.713 | 0.678 | 0.706 |
| 0.723 | 0.717 | 0.696 | 0.745 | 0.646 | 0.693 |
| 0.642 | 0.911 | 0.751 | 0.697 | 0.704 | 0.757 |
| 0.705 | 0.896 | 0.728 | 0.693 | 0.734 | 0.748 |
| 0.681 | 0.793 | 0.696 | 0.695 | 0.668 | 0.682 |
| 0.736 | 0.848 | 0.73  | 0.703 | 0.672 | 0.778 |
| 0.649 | 0.61  | 0.544 | 0.626 | 0.551 | 0.522 |
| 0.558 | 0.571 | 0.535 | 0.538 | 0.6   | 0.552 |
| 0.542 | 0.554 | 0.529 | 0.538 | 0.53  | 0.501 |
| 0.583 | 0.581 | 0.521 | 0.56  | 0.581 | 0.575 |
| 0.311 | 0.64  | 0.777 | 0.828 | 0.617 | 0.662 |
| 0.254 | 0.612 | 0.705 | 0.745 | 0.667 | 0.653 |
| 0.269 | 0.535 | 0.691 | 0.671 | 0.571 | 0.598 |
| 0.277 | 0.57  | 0.702 | 0.712 | 0.526 | 0.609 |
| 0.229 | 0.433 | 0.641 | 0.852 | 0.75  | 0.798 |
| 0.182 | 0.435 | 0.661 | 0.786 | 0.806 | 0.778 |
| 0.261 | 0.416 | 0.655 | 0.767 | 0.737 | 0.755 |
| 0.273 | 0.444 | 0.684 | 0.819 | 0.694 | 0.755 |
| 0.759 | 0.734 | 0.618 | 0.646 | 0.675 | 0.737 |
| 0.803 | 0.728 | 0.618 | 0.607 | 0.664 | 0.701 |
| 0.815 | 0.673 | 0.574 | 0.572 | 0.629 | 0.673 |
| 0.87  | 0.7   | 0.58  | 0.586 | 0.584 | 0.634 |
| 0.656 | 0.644 | 0.618 | 0.629 | 0.653 | 0.607 |
| 0.645 | 0.653 | 0.623 | 0.617 | 0.644 | 0.618 |
| 0.658 | 0.621 | 0.6   | 0.601 | 0.623 | 0.571 |
| 0.683 | 0.62  | 0.598 | 0.603 | 0.607 | 0.555 |
| 0.572 | 0.71  | 0.678 | 0.75  | 0.659 | 0.769 |
| 0.655 | 0.71  | 0.674 | 0.647 | 0.673 | 0.764 |
| 0.601 | 0.705 | 0.69  | 0.733 | 0.687 | 0.771 |
| 0.654 | 0.746 | 0.723 | 0.734 | 0.622 | 0.692 |
| 0.523 | 0.514 | 0.496 | 0.53  | 0.513 | 0.551 |
| 0.538 | 0.517 | 0.507 | 0.479 | 0.523 | 0.568 |
| 0.508 | 0.52  | 0.528 | 0.526 | 0.532 | 0.569 |
| 0.56  | 0.529 | 0.535 | 0.539 | 0.488 | 0.536 |

|       |       |       |       |       |        |
|-------|-------|-------|-------|-------|--------|
| 0.768 | 0.745 | 0.722 | 0.754 | 0.726 | 0.797  |
| 0.818 | 0.74  | 0.723 | 0.719 | 0.752 | 0.805  |
| 0.769 | 0.761 | 0.783 | 0.777 | 0.745 | 0.816  |
| 0.849 | 0.773 | 0.766 | 0.787 | 0.702 | 0.771  |
| 0.201 | 0.241 | 0.236 | 0.258 | 0.24  | 0.266  |
| 0.198 | 0.274 | 0.237 | 0.224 | 0.248 | 0.264  |
| 0.209 | 0.239 | 0.243 | 0.234 | 0.223 | 0.259  |
| 0.222 | 0.247 | 0.24  | 0.261 | 0.21  | 0.25   |
| 0.489 | 0.347 | 0.245 | 0.243 | 0.264 | 0.34   |
| 0.561 | 0.35  | 0.227 | 0.222 | 0.28  | 0.35   |
| 0.529 | 0.345 | 0.24  | 0.227 | 0.26  | 0.329  |
| 0.615 | 0.385 | 0.246 | 0.252 | 0.244 | 0.31   |
| 0.966 | 0.731 | 0.534 | 0.585 | 0.565 | 0.636  |
| 0.997 | 0.711 | 0.537 | 0.563 | 0.594 | 0.636  |
| 0.93  | 0.709 | 0.519 | 0.548 | 0.553 | 0.596  |
| 0.825 | 0.74  | 0.533 | 0.578 | 0.512 | 0.553  |
| 0.249 | 0.138 | 0.153 | 0.123 | 0.131 | 0.133  |
| 0.201 | 0.226 | 0.173 | 0.141 | 0.094 | 0.136  |
| 0.137 | 0.141 | 0.162 | 0.15  | 0.121 | 0.124  |
| 0.122 | 0.273 | 0.192 | 0.115 | 0.159 | 0.113  |
| 0.417 | 0.446 | 0.439 | 0.42  | 0.437 | 0.453  |
| 0.43  | 0.446 | 0.428 | 0.42  | 0.439 | 0.455  |
| 0.399 | 0.449 | 0.434 | 0.414 | 0.418 | 0.4483 |
| 0.43  | 0.451 | 0.436 | 0.429 | 0.419 | 0.437  |
| 0.55  | 0.551 | 0.511 | 0.563 | 0.563 | 0.556  |
| 0.553 | 0.556 | 0.509 | 0.522 | 0.554 | 0.562  |
| 0.565 | 0.551 | 0.506 | 0.55  | 0.54  | 0.547  |
| 0.544 | 0.551 | 0.498 | 0.542 | 0.529 | 0.546  |
| 0.778 | 0.861 | 0.753 | 0.687 | 0.783 | 0.704  |
| 0.805 | 0.873 | 0.736 | 0.618 | 0.811 | 0.714  |
| 0.797 | 0.878 | 0.792 | 0.679 | 0.776 | 0.708  |
| 0.87  | 0.914 | 0.802 | 0.731 | 0.694 | 0.68   |
| 0.607 | 0.612 | 0.558 | 0.582 | 0.596 | 0.596  |
| 0.617 | 0.604 | 0.565 | 0.555 | 0.613 | 0.596  |
| 0.622 | 0.585 | 0.555 | 0.563 | 0.584 | 0.588  |
| 0.651 | 0.597 | 0.561 | 0.568 | 0.547 | 0.552  |
| 0.061 | 0.08  | 0.07  | 0.064 | 0.067 | 0.104  |
| 0.07  | 0.084 | 0.063 | 0.045 | 0.072 | 0.117  |
| 0.064 | 0.09  | 0.094 | 0.055 | 0.074 | 0.095  |
| 0.095 | 0.103 | 0.083 | 0.074 | 0.051 | 0.086  |

|       |       |       |       |        |       |
|-------|-------|-------|-------|--------|-------|
| 0.261 | 0.263 | 0.259 | 0.268 | 0.257  | 0.289 |
| 0.287 | 0.264 | 0.265 | 0.278 | 0.261  | 0.28  |
| 0.272 | 0.257 | 0.263 | 0.275 | 0.269  | 0.285 |
| 0.298 | 0.287 | 0.289 | 0.293 | 0.284  | 0.29  |
| 0.433 | 0.451 | 0.409 | 0.427 | 0.414  | 0.425 |
| 0.479 | 0.455 | 0.427 | 0.438 | 0.4237 | 0.406 |
| 0.463 | 0.443 | 0.422 | 0.436 | 0.434  | 0.451 |
| 0.461 | 0.446 | 0.43  | 0.443 | 0.423  | 0.432 |
| 0.374 | 0.368 | 0.371 | 0.358 | 0.366  | 0.372 |
| 0.358 | 0.366 | 0.358 | 0.366 | 0.342  | 0.371 |
| 0.373 | 0.358 | 0.352 | 0.352 | 0.354  | 0.352 |
| 0.367 | 0.364 | 0.378 | 0.384 | 0.349  | 0.352 |
| 0.634 | 0.648 | 0.628 | 0.664 | 0.614  | 0.673 |
| 0.612 | 0.668 | 0.634 | 0.694 | 0.597  | 0.652 |
| 0.667 | 0.623 | 0.602 | 0.662 | 0.623  | 0.628 |
| 0.659 | 0.662 | 0.635 | 0.659 | 0.594  | 0.63  |
| 0.629 | 0.743 | 0.682 | 0.647 | 0.672  | 0.653 |
| 0.605 | 0.817 | 0.771 | 0.669 | 0.711  | 0.607 |
| 0.723 | 0.614 | 0.571 | 0.7   | 0.73   | 0.721 |
| 0.679 | 0.689 | 0.697 | 0.577 | 0.59   | 0.647 |
| 0.522 | 0.569 | 0.516 | 0.512 | 0.512  | 0.557 |
| 0.579 | 0.574 | 0.542 | 0.528 | 0.539  | 0.486 |
| 0.547 | 0.489 | 0.459 | 0.463 | 0.439  | 0.472 |
| 0.51  | 0.509 | 0.486 | 0.455 | 0.548  | 0.484 |
| 0.419 | 0.679 | 0.688 | 0.66  | 0.595  | 0.507 |
| 0.407 | 0.687 | 0.774 | 0.676 | 0.56   | 0.478 |
| 0.46  | 0.582 | 0.629 | 0.612 | 0.539  | 0.509 |
| 0.421 | 0.578 | 0.736 | 0.677 | 0.581  | 0.49  |
| 0.26  | 0.443 | 0.608 | 0.69  | 0.599  | 0.527 |
| 0.236 | 0.472 | 0.682 | 0.656 | 0.548  | 0.511 |
| 0.331 | 0.386 | 0.618 | 0.637 | 0.558  | 0.474 |
| 0.28  | 0.398 | 0.647 | 0.626 | 0.566  | 0.482 |
| 0.76  | 0.67  | 0.569 | 0.543 | 0.565  | 0.622 |
| 0.756 | 0.656 | 0.568 | 0.594 | 0.545  | 0.562 |
| 0.754 | 0.646 | 0.553 | 0.535 | 0.566  | 0.609 |
| 0.773 | 0.654 | 0.617 | 0.57  | 0.593  | 0.608 |

|       |       |        |        |       |       |
|-------|-------|--------|--------|-------|-------|
| 0.607 | 0.581 | 0.617  | 0.553  | 0.587 | 0.598 |
| 0.614 | 0.578 | 0.627  | 0.561  | 0.587 | 0.583 |
| 0.602 | 0.569 | 0.618  | 0.556  | 0.59  | 0.578 |
| 0.618 | 0.564 | 0.618  | 0.555  | 0.592 | 0.585 |
| 0.558 | 0.693 | 0.694  | 0.717  | 0.75  | 0.777 |
| 0.559 | 0.715 | 0.7    | 0.729  | 0.55  | 0.695 |
| 0.586 | 0.658 | 0.632  | 0.649  | 0.654 | 0.718 |
| 0.644 | 0.717 | 0.716  | 0.643  | 0.696 | 0.686 |
| 0.536 | 0.56  | 0.55   | 0.543  | 0.551 | 0.546 |
| 0.579 | 0.56  | 0.577  | 0.572  | 0.525 | 0.553 |
| 0.596 | 0.547 | 0.575  | 0.549  | 0.553 | 0.548 |
| 0.612 | 0.596 | 0.5673 | 0.595  | 0.589 | 0.604 |
| 0.687 | 0.743 | 0.644  | 0.662  | 0.637 | 0.719 |
| 0.689 | 0.762 | 0.655  | 0.694  | 0.616 | 0.706 |
| 0.699 | 0.729 | 0.656  | 0.681  | 0.635 | 0.702 |
| 0.722 | 0.761 | 0.696  | 0.691  | 0.652 | 0.684 |
| 0.188 | 0.201 | 0.216  | 0.219  | 0.213 | 0.23  |
| 0.195 | 0.221 | 0.246  | 0.233  | 0.203 | 0.206 |
| 0.211 | 0.193 | 0.212  | 0.202  | 0.204 | 0.21  |
| 0.21  | 0.22  | 0.241  | 0.22   | 0.227 | 0.21  |
| 0.434 | 0.297 | 0.216  | 0.196  | 0.22  | 0.26  |
| 0.426 | 0.302 | 0.225  | 0.207  | 0.218 | 0.251 |
| 0.391 | 0.282 | 0.215  | 0.193  | 0.216 | 0.235 |
| 0.393 | 0.294 | 0.231  | 0.21   | 0.224 | 0.234 |
| 0.748 | 0.607 | 0.412  | 0.421  | 0.41  | 0.501 |
| 0.713 | 0.604 | 0.43   | 0.44   | 0.39  | 0.483 |
| 0.821 | 0.544 | 0.405  | 0.398  | 0.397 | 0.463 |
| 0.77  | 0.562 | 0.429  | 0.438  | 0.403 | 0.467 |
| 0.489 | 0.299 | 0.341  | 0.254  | 0.219 | 0.245 |
| 0.496 | 0.437 | 0.348  | 0.244  | 0.26  | 0.213 |
| 0.309 | 0.283 | 0.358  | 0.264  | 0.218 | 0.258 |
| 0.293 | 0.461 | 0.326  | 0.275  | 0.238 | 0.261 |
| 0.416 | 0.479 | 0.434  | 0.449  | 0.423 | 0.412 |
| 0.419 | 0.482 | 0.447  | 0.462  | 0.416 | 0.404 |
| 0.428 | 0.478 | 0.442  | 0.474  | 0.438 | 0.415 |
| 0.429 | 0.486 | 0.454  | 0.472  | 0.441 | 0.413 |
| 0.508 | 0.564 | 0.539  | 0.54   | 0.531 | 0.525 |
| 0.525 | 0.548 | 0.54   | 0.559  | 0.52  | 0.517 |
| 0.488 | 0.534 | 0.55   | 0.5483 | 0.547 | 0.527 |

|       |       |       |       |        |       |
|-------|-------|-------|-------|--------|-------|
| 0.52  | 0.561 | 0.546 | 0.546 | 0.534  | 0.525 |
| 0.785 | 0.822 | 0.676 | 0.661 | 0.571  | 0.691 |
| 0.798 | 0.83  | 0.702 | 0.673 | 0.524  | 0.686 |
| 0.783 | 0.898 | 0.764 | 0.717 | 0.621  | 0.685 |
| 0.842 | 0.907 | 0.774 | 0.723 | 0.649  | 0.608 |
| 0.695 | 0.61  | 0.562 | 0.567 | 0.558  | 0.553 |
| 0.656 | 0.629 | 0.576 | 0.567 | 0.536  | 0.551 |
| 0.647 | 0.613 | 0.562 | 0.535 | 0.546  | 0.535 |
| 0.651 | 0.606 | 0.551 | 0.538 | 0.525  | 0.535 |
| 0.067 | 0.082 | 0.061 | 0.052 | 0.054  | 0.077 |
| 0.068 | 0.097 | 0.078 | 0.075 | 0.048  | 0.08  |
| 0.092 | 0.078 | 0.06  | 0.053 | 0.055  | 0.067 |
| 0.095 | 0.099 | 0.097 | 0.08  | 0.067  | 0.08  |
| 0.273 | 0.272 | 0.277 | 0.27  | 0.277  | 0.277 |
| 0.273 | 0.27  | 0.281 | 0.276 | 0.269  | 0.284 |
| 0.283 | 0.263 | 0.268 | 0.265 | 0.279  | 0.272 |
| 0.267 | 0.263 | 0.269 | 0.289 | 0.275  | 0.27  |
| 0.431 | 0.43  | 0.437 | 0.426 | 0.41   | 0.405 |
| 0.438 | 0.432 | 0.427 | 0.426 | 0.399  | 0.416 |
| 0.432 | 0.43  | 0.417 | 0.417 | 0.412  | 0.391 |
| 0.427 | 0.434 | 0.425 | 0.424 | 0.379  | 0.4   |
| 0.396 | 0.386 | 0.403 | 0.413 | 0.415  | 0.423 |
| 0.385 | 0.394 | 0.421 | 0.417 | 0.367  | 0.42  |
| 0.423 | 0.391 | 0.38  | 0.383 | 0.401  | 0.385 |
| 0.389 | 0.393 | 0.396 | 0.371 | 0.335  | 0.388 |
| 0.675 | 0.68  | 0.656 | 0.693 | 0.68   | 0.68  |
| 0.694 | 0.711 | 0.694 | 0.719 | 0.651  | 0.688 |
| 0.767 | 0.689 | 0.669 | 0.697 | 0.668  | 0.675 |
| 0.679 | 0.701 | 0.669 | 0.729 | 0.6663 | 0.667 |
| 0.741 | 0.791 | 0.749 | 0.702 | 0.673  | 0.678 |
| 0.637 | 0.871 | 0.826 | 0.682 | 0.618  | 0.662 |
| 0.813 | 0.653 | 0.638 | 0.569 | 0.607  | 0.6   |
| 0.665 | 0.729 | 0.628 | 0.674 | 0.498  | 0.706 |
| 0.562 | 0.585 | 0.569 | 0.576 | 0.557  | 0.551 |
| 0.498 | 0.6   | 0.598 | 0.571 | 0.512  | 0.587 |
| 0.611 | 0.514 | 0.51  | 0.479 | 0.482  | 0.498 |

|       |       |       |       |        |        |
|-------|-------|-------|-------|--------|--------|
| 0.593 | 0.547 | 0.498 | 0.509 | 0.459  | 0.562  |
| 0.518 | 0.776 | 0.835 | 0.802 | 0.689  | 0.737  |
| 0.446 | 0.836 | 0.849 | 0.782 | 0.661  | 0.778  |
| 0.603 | 0.667 | 0.714 | 0.652 | 0.562  | 0.581  |
| 0.393 | 0.739 | 0.674 | 0.71  | 0.464  | 0.494  |
| 0.253 | 0.522 | 0.733 | 0.88  | 0.81   | 0.827  |
| 0.224 | 0.566 | 0.816 | 0.827 | 0.787  | 0.825  |
| 0.309 | 0.474 | 0.708 | 0.772 | 0.707  | 0.73   |
| 0.231 | 0.502 | 0.702 | 0.83  | 0.615  | 0.649  |
| 0.857 | 0.801 | 0.648 | 0.618 | 0.626  | 0.738  |
| 0.803 | 0.81  | 0.669 | 0.61  | 0.589  | 0.715  |
| 0.943 | 0.765 | 0.571 | 0.54  | 0.538  | 0.639  |
| 0.749 | 0.761 | 0.558 | 0.537 | 0.474  | 0.597  |
| 0.666 | 0.673 | 0.677 | 0.618 | 0.621  | 0.61   |
| 0.632 | 0.691 | 0.685 | 0.627 | 0.605  | 0.622  |
| 0.697 | 0.661 | 0.663 | 0.593 | 0.581  | 0.603  |
| 0.646 | 0.657 | 0.665 | 0.591 | 0.552  | 0.606  |
| 0.5   | 0.587 | 0.635 | 0.65  | 0.648  | 0.681  |
| 0.537 | 0.608 | 0.668 | 0.638 | 0.567  | 0.69   |
| 0.566 | 0.562 | 0.623 | 0.601 | 0.617  | 0.661  |
| 0.552 | 0.592 | 0.608 | 0.583 | 0.6107 | 0.636  |
| 0.503 | 0.562 | 0.526 | 0.582 | 0.523  | 0.523  |
| 0.505 | 0.591 | 0.595 | 0.575 | 0.516  | 0.5213 |
| 0.555 | 0.554 | 0.53  | 0.543 | 0.531  | 0.524  |
| 0.534 | 0.57  | 0.552 | 0.572 | 0.5233 | 0.517  |
| 0.81  | 0.849 | 0.781 | 0.735 | 0.757  | 0.807  |
| 0.82  | 0.882 | 0.807 | 0.723 | 0.731  | 0.814  |
| 0.852 | 0.873 | 0.79  | 0.725 | 0.729  | 0.784  |
| 0.831 | 0.891 | 0.777 | 0.726 | 0.66   | 0.793  |
| 0.222 | 0.235 | 0.254 | 0.263 | 0.252  | 0.247  |
| 0.202 | 0.245 | 0.267 | 0.259 | 0.239  | 0.2427 |
| 0.236 | 0.233 | 0.238 | 0.233 | 0.221  | 0.238  |
| 0.222 | 0.24  | 0.246 | 0.252 | 0.2373 | 0.243  |
| 0.577 | 0.404 | 0.259 | 0.236 | 0.254  | 0.27   |
| 0.553 | 0.335 | 0.272 | 0.241 | 0.246  | 0.291  |
| 0.675 | 0.382 | 0.245 | 0.224 | 0.237  | 0.263  |
| 0.535 | 0.327 | 0.248 | 0.234 | 0.197  | 0.231  |
| 0.998 | 0.718 | 0.521 | 0.493 | 0.491  | 0.57   |
| 0.94  | 0.723 | 0.543 | 0.525 | 0.475  | 0.594  |

|        |       |        |        |        |        |
|--------|-------|--------|--------|--------|--------|
| 0.873  | 0.667 | 0.488  | 0.456  | 0.451  | 0.519  |
| 0.944  | 0.691 | 0.496  | 0.478  | 0.392  | 0.505  |
| 0.575  | 0.282 | 0.43   | 0.259  | 0.287  | 0.3    |
| 0.534  | 0.541 | 0.402  | 0.29   | 0.292  | 0.264  |
| 0.4647 | 0.316 | 0.405  | 0.27   | 0.246  | 0.285  |
| 0.285  | 0.459 | 0.42   | 0.281  | 0.304  | 0.212  |
| 0.423  | 0.434 | 0.405  | 0.413  | 0.42   | 0.429  |
| 0.416  | 0.439 | 0.433  | 0.424  | 0.41   | 0.439  |
| 0.439  | 0.416 | 0.412  | 0.397  | 0.389  | 0.415  |
| 0.401  | 0.418 | 0.403  | 0.411  | 0.4063 | 0.41   |
| 0.56   | 0.551 | 0.524  | 0.519  | 0.558  | 0.553  |
| 0.564  | 0.557 | 0.525  | 0.526  | 0.543  | 0.554  |
| 0.577  | 0.545 | 0.517  | 0.509  | 0.544  | 0.548  |
| 0.552  | 0.534 | 0.51   | 0.522  | 0.533  | 0.545  |
| 0.873  | 0.884 | 0.718  | 0.785  | 0.702  | 0.692  |
| 0.825  | 0.922 | 0.796  | 0.774  | 0.681  | 0.6607 |
| 0.934  | 0.886 | 0.735  | 0.729  | 0.683  | 0.661  |
| 0.801  | 0.911 | 0.721  | 0.68   | 0.6887 | 0.629  |
| 0.639  | 0.612 | 0.575  | 0.615  | 0.573  | 0.611  |
| 0.624  | 0.631 | 0.602  | 0.628  | 0.558  | 0.621  |
| 0.677  | 0.607 | 0.564  | 0.587  | 0.549  | 0.591  |
| 0.62   | 0.607 | 0.559  | 0.6    | 0.503  | 0.568  |
| 0.135  | 0.187 | 0.122  | 0.098  | 0.109  | 0.156  |
| 0.126  | 0.212 | 0.151  | 0.105  | 0.093  | 0.178  |
| 0.191  | 0.19  | 0.124  | 0.089  | 0.088  | 0.15   |
| 0.149  | 0.192 | 0.129  | 0.1    | 0.061  | 0.134  |
| 0.3    | 0.279 | 0.279  | 0.295  | 0.284  | 0.264  |
| 0.3    | 0.254 | 0.249  | 0.2923 | 0.279  | 0.262  |
| 0.293  | 0.292 | 0.293  | 0.292  | 0.281  | 0.266  |
| 0.315  | 0.296 | 0.292  | 0.29   | 0.279  | 0.26   |
| 0.482  | 0.444 | 0.456  | 0.443  | 0.406  | 0.419  |
| 0.498  | 0.459 | 0.459  | 0.393  | 0.413  | 0.424  |
| 0.477  | 0.451 | 0.456  | 0.462  | 0.418  | 0.44   |
| 0.496  | 0.482 | 0.465  | 0.461  | 0.402  | 0.437  |
| 0.429  | 0.402 | 0.417  | 0.403  | 0.407  | 0.39   |
| 0.419  | 0.408 | 0.4143 | 0.414  | 0.421  | 0.412  |

|       |        |        |        |       |       |
|-------|--------|--------|--------|-------|-------|
| 0.418 | 0.413  | 0.42   | 0.423  | 0.412 | 0.392 |
| 0.429 | 0.409  | 0.406  | 0.416  | 0.431 | 0.403 |
| 0.738 | 0.71   | 0.737  | 0.745  | 0.717 | 0.725 |
| 0.752 | 0.713  | 0.735  | 0.749  | 0.746 | 0.737 |
| 0.726 | 0.714  | 0.745  | 0.756  | 0.753 | 0.727 |
| 0.74  | 0.715  | 0.723  | 0.746  | 0.775 | 0.77  |
| 0.668 | 0.84   | 0.814  | 0.87   | 0.69  | 0.632 |
| 0.655 | 0.699  | 0.599  | 0.553  | 0.631 | 0.624 |
| 0.595 | 0.732  | 0.701  | 0.752  | 0.591 | 0.553 |
| 0.613 | 0.777  | 0.709  | 0.682  | 0.625 | 0.581 |
| 0.556 | 0.581  | 0.579  | 0.609  | 0.538 | 0.531 |
| 0.545 | 0.504  | 0.436  | 0.454  | 0.556 | 0.523 |
| 0.634 | 0.536  | 0.542  | 0.592  | 0.52  | 0.482 |
| 0.579 | 0.554  | 0.519  | 0.538  | 0.542 | 0.505 |
| 0.448 | 0.768  | 0.952  | 0.972  | 0.772 | 0.637 |
| 0.467 | 0.615  | 0.601  | 0.584  | 0.737 | 0.644 |
| 0.471 | 0.697  | 0.868  | 0.839  | 0.698 | 0.563 |
| 0.479 | 0.724  | 0.846  | 0.786  | 0.684 | 0.612 |
| 0.255 | 0.459  | 0.737  | 0.901  | 0.782 | 0.683 |
| 0.206 | 0.441  | 0.547  | 0.693  | 0.763 | 0.719 |
| 0.258 | 0.43   | 0.699  | 0.934  | 0.777 | 0.665 |
| 0.252 | 0.465  | 0.682  | 0.869  | 0.744 | 0.692 |
| 0.97  | 0.778  | 0.713  | 0.633  | 0.639 | 0.696 |
| 1.023 | 0.616  | 0.537  | 0.6347 | 0.623 | 0.699 |
| 0.936 | 0.817  | 0.708  | 0.641  | 0.642 | 0.71  |
| 1.023 | 0.848  | 0.72   | 0.63   | 0.635 | 0.703 |
| 0.632 | 0.639  | 0.645  | 0.629  | 0.605 | 0.598 |
| 0.631 | 0.6467 | 0.6483 | 0.641  | 0.613 | 0.608 |
| 0.624 | 0.641  | 0.63   | 0.662  | 0.609 | 0.646 |
| 0.637 | 0.66   | 0.67   | 0.632  | 0.632 | 0.596 |
| 0.655 | 0.686  | 0.75   | 0.801  | 0.741 | 0.794 |
| 0.661 | 0.531  | 0.507  | 0.7663 | 0.716 | 0.784 |
| 0.612 | 0.708  | 0.712  | 0.769  | 0.709 | 0.776 |
| 0.643 | 0.723  | 0.752  | 0.729  | 0.736 | 0.758 |
| 0.511 | 0.502  | 0.549  | 0.57   | 0.531 | 0.526 |
| 0.542 | 0.433  | 0.407  | 0.5767 | 0.513 | 0.547 |
| 0.502 | 0.55   | 0.559  | 0.589  | 0.527 | 0.568 |
| 0.567 | 0.579  | 0.559  | 0.571  | 0.553 | 0.571 |
| 0.729 | 0.702  | 0.751  | 0.775  | 0.685 | 0.733 |

|       |        |        |        |        |       |
|-------|--------|--------|--------|--------|-------|
| 0.757 | 0.7203 | 0.7293 | 0.7493 | 0.683  | 0.801 |
| 0.741 | 0.729  | 0.723  | 0.741  | 0.697  | 0.739 |
| 0.77  | 0.73   | 0.714  | 0.732  | 0.717  | 0.751 |
| 0.211 | 0.209  | 0.249  | 0.247  | 0.254  | 0.22  |
| 0.213 | 0.179  | 0.181  | 0.244  | 0.263  | 0.241 |
| 0.19  | 0.208  | 0.245  | 0.244  | 0.254  | 0.231 |
| 0.209 | 0.23   | 0.246  | 0.241  | 0.267  | 0.241 |
| 0.562 | 0.349  | 0.276  | 0.248  | 0.259  | 0.303 |
| 0.605 | 0.235  | 0.184  | 0.25   | 0.259  | 0.312 |
| 0.525 | 0.362  | 0.273  | 0.247  | 0.252  | 0.29  |
| 0.628 | 0.378  | 0.271  | 0.255  | 0.265  | 0.296 |
| 0.938 | 0.631  | 0.502  | 0.496  | 0.516  | 0.561 |
| 0.934 | 0.507  | 0.402  | 0.4993 | 0.526  | 0.594 |
| 0.899 | 0.623  | 0.509  | 0.503  | 0.498  | 0.545 |
| 0.932 | 0.64   | 0.479  | 0.499  | 0.529  | 0.572 |
| 0.4   | 0.343  | 0.335  | 0.308  | 0.284  | 0.293 |
| 0.514 | 0.616  | 0.338  | 0.243  | 0.2987 | 0.265 |
| 0.328 | 0.314  | 0.387  | 0.319  | 0.314  | 0.296 |
| 0.299 | 0.547  | 0.401  | 0.303  | 0.298  | 0.306 |
| 0.436 | 0.443  | 0.444  | 0.426  | 0.417  | 0.44  |
| 0.472 | 0.383  | 0.366  | 0.4427 | 0.421  | 0.443 |
| 0.434 | 0.462  | 0.435  | 0.448  | 0.431  | 0.466 |
| 0.47  | 0.48   | 0.469  | 0.454  | 0.447  | 0.471 |
| 0.6   | 0.555  | 0.557  | 0.545  | 0.543  | 0.553 |
| 0.615 | 0.509  | 0.504  | 0.502  | 0.555  | 0.562 |
| 0.587 | 0.543  | 0.545  | 0.542  | 0.523  | 0.579 |
| 0.626 | 0.589  | 0.548  | 0.551  | 0.561  | 0.567 |
| 0.878 | 0.794  | 0.815  | 0.676  | 0.652  | 0.699 |
| 0.901 | 0.853  | 0.565  | 0.502  | 0.656  | 0.697 |
| 0.821 | 0.87   | 0.843  | 0.759  | 0.681  | 0.743 |
| 0.913 | 0.895  | 0.84   | 0.781  | 0.718  | 0.742 |
| 0.672 | 0.634  | 0.628  | 0.582  | 0.582  | 0.601 |
| 0.656 | 0.578  | 0.521  | 0.58   | 0.59   | 0.613 |
| 0.66  | 0.623  | 0.619  | 0.586  | 0.567  | 0.594 |
| 0.676 | 0.63   | 0.607  | 0.572  | 0.591  | 0.612 |
| 0.063 | 0.056  | 0.059  | 0.056  | 0.055  | 0.065 |
| 0.062 | 0.0575 | 0.0587 | 0.057  | 0.061  | 0.083 |
| 0.057 | 0.059  | 0.057  | 0.057  | 0.05   | 0.064 |
| 0.07  | 0.0575 | 0.06   | 0.058  | 0.061  | 0.078 |

|       |       |        |       |        |        |
|-------|-------|--------|-------|--------|--------|
| 0.282 | 0.284 | 0.278  | 0.297 | 0.2883 | 0.297  |
| 0.288 | 0.284 | 0.284  | 0.28  | 0.292  | 0.307  |
| 0.283 | 0.28  | 0.279  | 0.283 | 0.285  | 0.286  |
| 0.284 | 0.281 | 0.2803 | 0.272 | 0.288  | 0.292  |
| 0.483 | 0.454 | 0.485  | 0.448 | 0.479  | 0.474  |
| 0.493 | 0.433 | 0.478  | 0.437 | 0.446  | 0.479  |
| 0.51  | 0.428 | 0.451  | 0.427 | 0.424  | 0.453  |
| 0.499 | 0.423 | 0.463  | 0.422 | 0.423  | 0.448  |
| 0.388 | 0.39  | 0.389  | 0.405 | 0.392  | 0.4    |
| 0.402 | 0.382 | 0.393  | 0.406 | 0.406  | 0.4    |
| 0.411 | 0.393 | 0.395  | 0.425 | 0.411  | 0.41   |
| 0.425 | 0.396 | 0.401  | 0.426 | 0.406  | 0.405  |
| 0.644 | 0.689 | 0.693  | 0.716 | 0.677  | 0.695  |
| 0.652 | 0.698 | 0.675  | 0.695 | 0.702  | 0.728  |
| 0.649 | 0.708 | 0.681  | 0.716 | 0.697  | 0.733  |
| 0.678 | 0.703 | 0.721  | 0.72  | 0.691  | 0.701  |
| 0.702 | 0.899 | 0.802  | 0.879 | 0.727  | 0.695  |
| 0.709 | 0.845 | 0.774  | 0.828 | 0.768  | 0.767  |
| 0.742 | 0.834 | 0.758  | 0.803 | 0.734  | 0.727  |
| 0.731 | 0.878 | 0.821  | 0.778 | 0.724  | 0.706  |
| 0.718 | 0.591 | 0.567  | 0.584 | 0.561  | 0.546  |
| 0.598 | 0.575 | 0.568  | 0.579 | 0.571  | 0.571  |
| 0.627 | 0.56  | 0.576  | 0.595 | 0.566  | 0.552  |
| 0.653 | 0.589 | 0.567  | 0.587 | 0.552  | 0.5563 |
| 0.49  | 0.973 | 0.932  | 1.058 | 0.839  | 0.848  |
| 0.492 | 0.917 | 0.954  | 1.087 | 0.911  | 0.895  |
| 0.594 | 0.854 | 0.917  | 0.968 | 0.814  | 0.804  |
| 0.55  | 0.895 | 0.905  | 0.916 | 0.784  | 0.809  |
| 0.333 | 0.437 | 0.674  | 0.818 | 0.834  | 0.868  |
| 0.338 | 0.481 | 0.727  | 0.82  | 0.85   | 0.889  |
| 0.364 | 0.46  | 0.731  | 0.842 | 0.87   | 0.912  |
| 0.382 | 0.48  | 0.761  | 0.859 | 0.868  | 0.886  |
| 1.097 | 0.829 | 0.701  | 0.699 | 0.676  | 0.726  |
| 1.03  | 0.813 | 0.7    | 0.679 | 0.702  | 0.762  |
| 1.02  | 0.761 | 0.638  | 0.624 | 0.615  | 0.695  |
| 1.037 | 0.763 | 0.673  | 0.645 | 0.638  | 0.669  |

|       |       |        |       |       |        |
|-------|-------|--------|-------|-------|--------|
| 0.696 | 0.643 | 0.653  | 0.694 | 0.662 | 0.676  |
| 0.659 | 0.643 | 0.646  | 0.668 | 0.686 | 0.688  |
| 0.697 | 0.631 | 0.615  | 0.654 | 0.651 | 0.658  |
| 0.658 | 0.634 | 0.636  | 0.643 | 0.649 | 0.634  |
| 0.458 | 0.632 | 0.608  | 0.644 | 0.651 | 0.625  |
| 0.499 | 0.632 | 0.602  | 0.584 | 0.627 | 0.638  |
| 0.48  | 0.631 | 0.577  | 0.629 | 0.635 | 0.629  |
| 0.494 | 0.647 | 0.646  | 0.604 | 0.658 | 0.612  |
| 0.564 | 0.564 | 0.579  | 0.586 | 0.629 | 0.524  |
| 0.545 | 0.555 | 0.542  | 0.557 | 0.585 | 0.55   |
| 0.557 | 0.499 | 0.503  | 0.542 | 0.554 | 0.527  |
| 0.562 | 0.51  | 0.541  | 0.546 | 0.531 | 0.511  |
| 0.642 | 0.72  | 0.701  | 0.683 | 0.717 | 0.725  |
| 0.669 | 0.717 | 0.686  | 0.658 | 0.72  | 0.742  |
| 0.716 | 0.738 | 0.687  | 0.706 | 0.731 | 0.7267 |
| 0.757 | 0.705 | 0.745  | 0.673 | 0.758 | 0.713  |
| 0.195 | 0.209 | 0.22   | 0.215 | 0.22  | 0.23   |
| 0.2   | 0.207 | 0.219  | 0.217 | 0.22  | 0.234  |
| 0.2   | 0.208 | 0.219  | 0.218 | 0.22  | 0.232  |
| 0.208 | 0.21  | 0.232  | 0.218 | 0.229 | 0.226  |
| 0.401 | 0.262 | 0.218  | 0.225 | 0.227 | 0.285  |
| 0.456 | 0.262 | 0.197  | 0.221 | 0.242 | 0.292  |
| 0.441 | 0.286 | 0.21   | 0.226 | 0.221 | 0.29   |
| 0.528 | 0.279 | 0.219  | 0.231 | 0.24  | 0.282  |
| 0.941 | 0.712 | 0.53   | 0.559 | 0.571 | 0.619  |
| 0.975 | 0.661 | 0.513  | 0.542 | 0.596 | 0.667  |
| 0.978 | 0.699 | 0.515  | 0.55  | 0.567 | 0.645  |
| 1.018 | 0.659 | 0.522  | 0.575 | 0.59  | 0.622  |
| 0.557 | 0.373 | 0.401  | 0.29  | 0.295 | 0.29   |
| 0.615 | 0.513 | 0.418  | 0.268 | 0.277 | 0.27   |
| 0.389 | 0.345 | 0.456  | 0.286 | 0.309 | 0.292  |
| 0.308 | 0.642 | 0.42   | 0.306 | 0.298 | 0.308  |
| 0.46  | 0.472 | 0.489  | 0.487 | 0.497 | 0.534  |
| 0.453 | 0.464 | 0.498  | 0.45  | 0.487 | 0.524  |
| 0.452 | 0.465 | 0.459  | 0.464 | 0.467 | 0.507  |
| 0.458 | 0.473 | 0.502  | 0.456 | 0.462 | 0.496  |
| 0.557 | 0.585 | 0.597  | 0.586 | 0.606 | 0.608  |
| 0.573 | 0.602 | 0.605  | 0.603 | 0.621 | 0.58   |
| 0.594 | 0.547 | 0.5953 | 0.585 | 0.602 | 0.584  |
| 0.58  | 0.59  | 0.584  | 0.579 | 0.568 | 0.574  |

|       |        |       |       |       |       |
|-------|--------|-------|-------|-------|-------|
| 0.951 | 0.965  | 0.828 | 0.706 | 0.799 | 0.829 |
| 0.896 | 0.9227 | 0.812 | 0.726 | 0.768 | 0.844 |
| 0.978 | 0.891  | 0.763 | 0.697 | 0.722 | 0.792 |
| 0.933 | 0.912  | 0.809 | 0.723 | 0.719 | 0.786 |
| 0.682 | 0.635  | 0.607 | 0.579 | 0.584 | 0.562 |
| 0.696 | 0.627  | 0.579 | 0.569 | 0.601 | 0.592 |
| 0.734 | 0.626  | 0.584 | 0.569 | 0.587 | 0.578 |
| 0.732 | 0.62   | 0.604 | 0.587 | 0.592 | 0.576 |
| 0.054 | 0.046  | 0.048 | 0.047 | 0.053 | 0.062 |
| 0.053 | 0.045  | 0.045 | 0.041 | 0.05  | 0.079 |
| 0.046 | 0.058  | 0.053 | 0.054 | 0.056 | 0.078 |
| 0.062 | 0.059  | 0.064 | 0.058 | 0.053 | 0.081 |
| 0.325 | 0.308  | 0.275 | 0.299 | 0.304 | 0.308 |
| 0.3   | 0.296  | 0.296 | 0.287 | 0.286 | 0.284 |
| 0.332 | 0.3    | 0.288 | 0.31  | 0.318 | 0.323 |
| 0.304 | 0.307  | 0.279 | 0.306 | 0.311 | 0.315 |
| 0.523 | 0.504  | 0.519 | 0.494 | 0.477 | 0.489 |
| 0.501 | 0.496  | 0.516 | 0.493 | 0.459 | 0.467 |
| 0.529 | 0.518  | 0.516 | 0.534 | 0.516 | 0.513 |
| 0.499 | 0.496  | 0.513 | 0.519 | 0.505 | 0.503 |
| 0.367 | 0.405  | 0.438 | 0.396 | 0.432 | 0.403 |
| 0.389 | 0.427  | 0.451 | 0.396 | 0.417 | 0.424 |
| 0.403 | 0.429  | 0.401 | 0.439 | 0.458 | 0.447 |
| 0.418 | 0.474  | 0.419 | 0.441 | 0.461 | 0.46  |
| 0.676 | 0.596  | 0.713 | 0.658 | 0.714 | 0.652 |
| 0.68  | 0.606  | 0.745 | 0.618 | 0.596 | 0.653 |
| 0.661 | 0.634  | 0.648 | 0.675 | 0.756 | 0.73  |
| 0.707 | 0.705  | 0.673 | 0.707 | 0.704 | 0.676 |
| 0.761 | 0.735  | 0.73  | 0.721 | 0.645 | 0.656 |
| 0.766 | 0.748  | 0.662 | 0.705 | 0.561 | 0.572 |
| 0.756 | 0.819  | 0.725 | 0.767 | 0.705 | 0.722 |
| 0.782 | 0.802  | 0.81  | 0.726 | 0.635 | 0.726 |
| 0.621 | 0.579  | 0.62  | 0.602 | 0.562 | 0.585 |
| 0.642 | 0.592  | 0.567 | 0.569 | 0.506 | 0.539 |
| 0.747 | 0.679  | 0.608 | 0.828 | 0.808 | 0.833 |
| 0.697 | 0.633  | 0.619 | 0.749 | 0.652 | 0.549 |

|       |       |       |       |       |       |
|-------|-------|-------|-------|-------|-------|
| 0.449 | 0.708 | 0.923 | 0.823 | 0.755 | 0.689 |
| 0.472 | 0.724 | 0.933 | 0.745 | 0.696 | 0.632 |
| 0.434 | 0.819 | 0.913 | 0.883 | 0.792 | 0.728 |
| 0.453 | 0.752 | 0.951 | 0.821 | 0.749 | 0.635 |
| 0.188 | 0.406 | 0.679 | 0.782 | 0.733 | 0.729 |
| 0.222 | 0.416 | 0.725 | 0.729 | 0.739 | 0.731 |
| 0.172 | 0.423 | 0.743 | 0.807 | 0.737 | 0.763 |
| 0.204 | 0.455 | 0.73  | 0.773 | 0.747 | 0.756 |
| 0.931 | 0.818 | 0.736 | 0.67  | 0.685 | 0.717 |
| 0.876 | 0.761 | 0.667 | 0.645 | 0.631 | 0.594 |
| 0.983 | 0.904 | 0.669 | 0.763 | 0.732 | 0.746 |
| 0.902 | 0.836 | 0.665 | 0.691 | 0.662 | 0.653 |
| 0.716 | 0.743 | 0.7   | 0.72  | 0.69  | 0.694 |
| 0.707 | 0.71  | 0.687 | 0.691 | 0.667 | 0.692 |
| 0.736 | 0.733 | 0.678 | 0.735 | 0.717 | 0.758 |
| 0.733 | 0.757 | 0.694 | 0.748 | 0.728 | 0.71  |
| 0.539 | 0.569 | 0.581 | 0.614 | 0.631 | 0.625 |
| 0.54  | 0.612 | 0.599 | 0.667 | 0.553 | 0.598 |
| 0.538 | 0.577 | 0.58  | 0.606 | 0.64  | 0.645 |
| 0.525 | 0.576 | 0.632 | 0.609 | 0.607 | 0.592 |
| 0.534 | 0.548 | 0.535 | 0.485 | 0.554 | 0.43  |
| 0.515 | 0.51  | 0.427 | 0.38  | 0.436 | 0.398 |
| 0.519 | 0.553 | 0.522 | 0.536 | 0.449 | 0.474 |
| 0.492 | 0.527 | 0.431 | 0.463 | 0.523 | 0.451 |
| 0.929 | 0.843 | 0.795 | 0.808 | 0.851 | 0.906 |
| 0.963 | 0.858 | 0.839 | 0.807 | 0.731 | 0.874 |
| 0.899 | 0.873 | 0.809 | 0.876 | 0.901 | 0.968 |
| 0.946 | 0.939 | 0.858 | 0.843 | 0.911 | 0.951 |
| 0.217 | 0.233 | 0.242 | 0.268 | 0.266 | 0.254 |
| 0.229 | 0.243 | 0.245 | 0.27  | 0.24  | 0.253 |
| 0.221 | 0.247 | 0.229 | 0.284 | 0.276 | 0.269 |
| 0.228 | 0.263 | 0.243 | 0.286 | 0.279 | 0.267 |
| 0.675 | 0.345 | 0.25  | 0.224 | 0.245 | 0.252 |
| 0.711 | 0.36  | 0.267 | 0.218 | 0.219 | 0.25  |
| 0.708 | 0.387 | 0.232 | 0.243 | 0.264 | 0.277 |
| 0.743 | 0.41  | 0.238 | 0.247 | 0.261 | 0.276 |
| 0.96  | 0.687 | 0.576 | 0.525 | 0.529 | 0.577 |
| 1.01  | 0.708 | 0.596 | 0.518 | 0.472 | 0.575 |
| 1.045 | 0.765 | 0.529 | 0.575 | 0.586 | 0.639 |

|       |       |       |       |       |        |
|-------|-------|-------|-------|-------|--------|
| 1.086 | 0.825 | 0.563 | 0.574 | 0.576 | 0.651  |
| 0.87  | 0.56  | 0.536 | 0.36  | 0.364 | 0.4    |
| 0.787 | 0.503 | 0.529 | 0.376 | 0.337 | 0.354  |
| 0.758 | 0.794 | 0.112 | 0.378 | 0.386 | 0.308  |
| 0.745 | 0.715 | 0.371 | 0.394 | 0.372 | 0.317  |
| 0.511 | 0.472 | 0.493 | 0.458 | 0.449 | 0.49   |
| 0.496 | 0.462 | 0.493 | 0.457 | 0.419 | 0.445  |
| 0.5   | 0.472 | 0.491 | 0.474 | 0.44  | 0.487  |
| 0.49  | 0.455 | 0.477 | 0.446 | 0.433 | 0.459  |
| 0.633 | 0.608 | 0.572 | 0.609 | 0.619 | 0.652  |
| 0.634 | 0.587 | 0.576 | 0.587 | 0.594 | 0.615  |
| 0.619 | 0.602 | 0.573 | 0.662 | 0.648 | 0.655  |
| 0.609 | 0.595 | 0.545 | 0.605 | 0.623 | 0.652  |
| 1.147 | 1.186 | 0.935 | 0.967 | 0.975 | 0.982  |
| 1.143 | 1.178 | 0.932 | 0.872 | 0.948 | 0.964  |
| 1.216 | 1.296 | 0.865 | 1.007 | 0.94  | 0.9703 |
| 1.177 | 1.241 | 0.858 | 0.984 | 0.929 | 0.965  |
| 0.835 | 0.803 | 0.77  | 0.704 | 0.721 | 0.724  |
| 0.865 | 0.821 | 0.75  | 0.687 | 0.707 | 0.719  |
| 0.906 | 0.848 | 0.72  | 0.75  | 0.782 | 0.793  |
| 0.959 | 0.884 | 0.729 | 0.772 | 0.781 | 0.778  |
| 0.093 | 0.111 | 0.084 | 0.07  | 0.093 | 0.119  |
| 0.119 | 0.129 | 0.095 | 0.083 | 0.075 | 0.137  |
| 0.102 | 0.118 | 0.075 | 0.084 | 0.097 | 0.141  |
| 0.117 | 0.139 | 0.097 | 0.095 | 0.096 | 0.142  |
| 0.289 | 0.262 | 0.278 | 0.278 | 0.301 | 0.285  |
| 0.325 | 0.255 | 0.275 | 0.269 | 0.297 | 0.287  |
| 0.281 | 0.291 | 0.306 | 0.311 | 0.33  | 0.309  |
| 0.293 | 0.281 | 0.302 | 0.32  | 0.324 | 0.318  |
| 0.514 | 0.489 | 0.488 | 0.424 | 0.463 | 0.434  |
| 0.569 | 0.487 | 0.48  | 0.418 | 0.444 | 0.428  |
| 0.5   | 0.539 | 0.533 | 0.472 | 0.478 | 0.445  |
| 0.529 | 0.523 | 0.517 | 0.478 | 0.482 | 0.455  |
| 0.367 | 0.375 | 0.39  | 0.411 | 0.38  | 0.389  |
| 0.422 | 0.379 | 0.392 | 0.406 | 0.385 | 0.389  |
| 0.37  | 0.377 | 0.436 | 0.451 | 0.397 | 0.397  |

|       |       |       |        |       |       |
|-------|-------|-------|--------|-------|-------|
| 0.41  | 0.377 | 0.427 | 0.468  | 0.411 | 0.428 |
| 0.732 | 0.736 | 0.671 | 0.692  | 0.686 | 0.68  |
| 0.784 | 0.738 | 0.674 | 0.689  | 0.687 | 0.699 |
| 0.699 | 0.768 | 0.721 | 0.751  | 0.711 | 0.693 |
| 0.73  | 0.775 | 0.72  | 0.77   | 0.703 | 0.724 |
| 0.634 | 0.886 | 0.838 | 0.776  | 0.753 | 0.698 |
| 0.715 | 0.833 | 0.816 | 0.799  | 0.702 | 0.656 |
| 0.696 | 0.802 | 0.745 | 0.783  | 0.7   | 0.697 |
| 0.687 | 0.817 | 0.749 | 0.767  | 0.719 | 0.768 |
| 0.621 | 0.672 | 0.704 | 0.668  | 0.646 | 0.65  |
| 0.744 | 0.618 | 0.679 | 0.655  | 0.628 | 0.615 |
| 0.628 | 0.675 | 0.699 | 0.576  | 0.577 | 0.546 |
| 0.682 | 0.66  | 0.705 | 0.57   | 0.585 | 0.63  |
| 0.339 | 0.662 | 0.838 | 0.789  | 0.7   | 0.658 |
| 0.439 | 0.677 | 0.79  | 0.831  | 0.689 | 0.596 |
| 0.46  | 0.615 | 0.691 | 0.79   | 0.624 | 0.513 |
| 0.433 | 0.638 | 0.742 | 0.85   | 0.711 | 0.531 |
| 0.247 | 0.403 | 0.752 | 0.932  | 0.833 | 0.786 |
| 0.239 | 0.404 | 0.671 | 0.895  | 0.8   | 0.74  |
| 0.287 | 0.404 | 0.611 | 0.906  | 0.816 | 0.677 |
| 0.318 | 0.41  | 0.67  | 0.925  | 0.813 | 0.67  |
| 0.891 | 0.81  | 0.664 | 0.719  | 0.693 | 0.793 |
| 1.066 | 0.792 | 0.675 | 0.734  | 0.684 | 0.763 |
| 0.977 | 0.84  | 0.68  | 0.771  | 0.688 | 0.734 |
| 1.021 | 0.814 | 0.685 | 0.7413 | 0.695 | 0.745 |
| 0.679 | 0.691 | 0.713 | 0.699  | 0.683 | 0.733 |
| 0.75  | 0.694 | 0.707 | 0.694  | 0.661 | 0.73  |
| 0.681 | 0.765 | 0.76  | 0.777  | 0.724 | 0.724 |
| 0.715 | 0.719 | 0.744 | 0.791  | 0.694 | 0.729 |
| 0.71  | 0.784 | 0.805 | 0.837  | 0.821 | 0.786 |
| 0.727 | 0.739 | 0.799 | 0.827  | 0.791 | 0.806 |
| 0.744 | 0.754 | 0.747 | 0.838  | 0.746 | 0.72  |
| 0.709 | 0.74  | 0.778 | 0.8    | 0.761 | 0.721 |
| 0.746 | 0.706 | 0.722 | 0.695  | 0.7   | 0.817 |
| 0.898 | 0.81  | 0.697 | 0.837  | 0.809 | 0.781 |
| 0.752 | 0.909 | 0.876 | 0.948  | 0.935 | 0.799 |
| 0.89  | 0.827 | 0.893 | 0.97   | 0.91  | 0.908 |
| 0.766 | 0.788 | 0.744 | 0.734  | 0.763 | 0.772 |
| 0.82  | 0.75  | 0.727 | 0.727  | 0.73  | 0.758 |

|       |       |       |        |        |        |
|-------|-------|-------|--------|--------|--------|
| 0.79  | 0.803 | 0.805 | 0.805  | 0.754  | 0.738  |
| 0.809 | 0.804 | 0.762 | 0.805  | 0.77   | 0.762  |
| 0.215 | 0.233 | 0.25  | 0.25   | 0.25   | 0.272  |
| 0.231 | 0.226 | 0.249 | 0.252  | 0.247  | 0.275  |
| 0.209 | 0.239 | 0.267 | 0.274  | 0.236  | 0.24   |
| 0.213 | 0.237 | 0.255 | 0.264  | 0.238  | 0.26   |
| 0.589 | 0.341 | 0.259 | 0.234  | 0.249  | 0.311  |
| 0.667 | 0.311 | 0.247 | 0.2523 | 0.248  | 0.332  |
| 0.48  | 0.391 | 0.253 | 0.257  | 0.247  | 0.281  |
| 0.677 | 0.35  | 0.269 | 0.266  | 0.255  | 0.294  |
| 0.973 | 0.811 | 0.649 | 0.597  | 0.617  | 0.722  |
| 1.082 | 0.747 | 0.627 | 0.594  | 0.623  | 0.742  |
| 1.028 | 0.776 | 0.644 | 0.64   | 0.629  | 0.688  |
| 1.06  | 0.767 | 0.673 | 0.664  | 0.646  | 0.719  |
| 0.517 | 0.295 | 0.424 | 0.352  | 0.338  | 0.322  |
| 0.495 | 0.525 | 0.405 | 0.36   | 0.353  | 0.354  |
| 0.289 | 0.4   | 0.434 | 0.34   | 0.385  | 0.355  |
| 0.392 | 0.614 | 0.443 | 0.318  | 0.3587 | 0.32   |
| 0.477 | 0.444 | 0.479 | 0.482  | 0.463  | 0.505  |
| 0.508 | 0.443 | 0.488 | 0.481  | 0.454  | 0.499  |
| 0.486 | 0.469 | 0.505 | 0.514  | 0.469  | 0.49   |
| 0.522 | 0.459 | 0.494 | 0.527  | 0.461  | 0.508  |
| 0.61  | 0.573 | 0.574 | 0.564  | 0.576  | 0.595  |
| 0.661 | 0.589 | 0.579 | 0.583  | 0.584  | 0.585  |
| 0.606 | 0.607 | 0.631 | 0.628  | 0.603  | 0.616  |
| 0.636 | 0.585 | 0.587 | 0.598  | 0.582  | 0.633  |
| 0.94  | 0.915 | 0.847 | 0.764  | 0.779  | 0.819  |
| 1.135 | 0.863 | 0.807 | 0.766  | 0.779  | 0.791  |
| 0.912 | 1.115 | 0.962 | 0.977  | 0.955  | 0.839  |
| 1.05  | 1.049 | 0.99  | 1.084  | 0.881  | 0.96   |
| 0.608 | 0.585 | 0.58  | 0.598  | 0.616  | 0.592  |
| 0.658 | 0.57  | 0.569 | 0.597  | 0.6333 | 0.574  |
| 0.625 | 0.614 | 0.614 | 0.645  | 0.636  | 0.558  |
| 0.672 | 0.604 | 0.611 | 0.659  | 0.648  | 0.621  |
| 0.075 | 0.095 | 0.094 | 0.075  | 0.074  | 0.083  |
| 0.102 | 0.087 | 0.09  | 0.069  | 0.067  | 0.095  |
| 0.079 | 0.112 | 0.113 | 0.12   | 0.087  | 0.084  |
| 0.103 | 0.108 | 0.11  | 0.125  | 0.095  | 0.0873 |

|        |        |        |       |       |       |
|--------|--------|--------|-------|-------|-------|
| 0.301  | 0.304  | 0.295  | 0.284 | 0.282 | 0.275 |
| 0.276  | 0.301  | 0.292  | 0.279 | 0.291 | 0.275 |
| 0.306  | 0.279  | 0.272  | 0.276 | 0.275 | 0.257 |
| 0.283  | 0.278  | 0.27   | 0.255 | 0.261 | 0.253 |
| 0.498  | 0.481  | 0.467  | 0.452 | 0.442 | 0.424 |
| 0.456  | 0.483  | 0.455  | 0.442 | 0.44  | 0.446 |
| 0.536  | 0.459  | 0.425  | 0.442 | 0.432 | 0.422 |
| 0.402  | 0.463  | 0.422  | 0.414 | 0.41  | 0.409 |
| 0.401  | 0.3697 | 0.372  | 0.384 | 0.383 | 0.39  |
| 0.4    | 0.356  | 0.366  | 0.38  | 0.387 | 0.384 |
| 0.3937 | 0.376  | 0.386  | 0.384 | 0.386 | 0.369 |
| 0.38   | 0.377  | 0.368  | 0.382 | 0.391 | 0.375 |
| 0.666  | 0.651  | 0.633  | 0.668 | 0.634 | 0.664 |
| 0.693  | 0.709  | 0.632  | 0.644 | 0.632 | 0.671 |
| 0.66   | 0.689  | 0.636  | 0.653 | 0.626 | 0.642 |
| 0.668  | 0.678  | 0.613  | 0.649 | 0.65  | 0.678 |
| 0.778  | 0.764  | 0.775  | 0.772 | 0.668 | 0.742 |
| 0.739  | 0.771  | 0.673  | 0.717 | 0.743 | 0.691 |
| 0.629  | 0.747  | 0.658  | 0.703 | 0.603 | 0.569 |
| 0.629  | 0.701  | 0.616  | 0.735 | 0.58  | 0.601 |
| 0.64   | 0.627  | 0.626  | 0.689 | 0.628 | 0.683 |
| 0.616  | 0.677  | 0.588  | 0.677 | 0.62  | 0.682 |
| 0.544  | 0.625  | 0.562  | 0.637 | 0.582 | 0.523 |
| 0.6    | 0.633  | 0.592  | 0.628 | 0.534 | 0.544 |
| 0.505  | 0.713  | 0.7047 | 0.8   | 0.656 | 0.665 |
| 0.527  | 0.721  | 0.729  | 0.697 | 0.605 | 0.684 |
| 0.487  | 0.637  | 0.707  | 0.742 | 0.693 | 0.586 |
| 0.2    | 0.655  | 0.678  | 0.731 | 0.597 | 0.641 |
| 0.291  | 0.508  | 0.864  | 0.915 | 0.834 | 0.785 |
| 0.292  | 0.511  | 0.775  | 0.843 | 0.81  | 0.778 |
| 0.241  | 0.446  | 0.708  | 0.845 | 0.874 | 0.755 |
| 0.216  | 0.48   | 0.686  | 0.811 | 0.74  | 0.749 |
| 1.028  | 0.807  | 0.731  | 0.69  | 0.693 | 0.766 |
| 0.931  | 0.836  | 0.709  | 0.698 | 0.65  | 0.742 |
| 1.006  | 0.762  | 0.624  | 0.705 | 0.617 | 0.643 |
| 0.62   | 0.717  | 0.608  | 0.61  | 0.604 | 0.648 |
| 0.719  | 0.707  | 0.69   | 0.678 | 0.69  | 0.667 |

|        |       |       |        |       |       |
|--------|-------|-------|--------|-------|-------|
| 0.691  | 0.718 | 0.685 | 0.65   | 0.703 | 0.698 |
| 0.715  | 0.726 | 0.659 | 0.698  | 0.669 | 0.642 |
| 0.721  | 0.686 | 0.663 | 0.632  | 0.677 | 0.644 |
| 0.766  | 0.852 | 0.902 | 0.86   | 0.826 | 0.883 |
| 0.726  | 0.873 | 0.873 | 0.82   | 0.835 | 0.803 |
| 0.841  | 0.769 | 0.772 | 0.82   | 0.828 | 0.787 |
| 0.725  | 0.748 | 0.775 | 0.826  | 0.797 | 0.743 |
| 0.834  | 0.939 | 1.091 | 1.062  | 1.006 | 0.958 |
| 0.8    | 0.954 | 0.965 | 0.962  | 0.922 | 0.867 |
| 1.118  | 0.846 | 0.826 | 0.998  | 0.816 | 0.713 |
| 0.75   | 0.872 | 0.771 | 0.797  | 0.916 | 0.805 |
| 0.759  | 0.729 | 0.756 | 0.683  | 0.695 | 0.755 |
| 0.739  | 0.764 | 0.744 | 0.651  | 0.685 | 0.735 |
| 0.734  | 0.736 | 0.72  | 0.653  | 0.699 | 0.675 |
| 0.744  | 0.719 | 0.706 | 0.638  | 0.676 | 0.68  |
| 0.218  | 0.207 | 0.226 | 0.2297 | 0.238 | 0.25  |
| 0.21   | 0.221 | 0.228 | 0.227  | 0.232 | 0.243 |
| 0.2    | 0.22  | 0.231 | 0.231  | 0.235 | 0.229 |
| 0.2093 | 0.21  | 0.222 | 0.231  | 0.233 | 0.233 |
| 0.575  | 0.331 | 0.243 | 0.227  | 0.226 | 0.277 |
| 0.456  | 0.337 | 0.239 | 0.219  | 0.228 | 0.287 |
| 0.417  | 0.337 | 0.23  | 0.221  | 0.222 | 0.251 |
| 0.224  | 0.331 | 0.231 | 0.222  | 0.211 | 0.258 |
| 1.098  | 0.655 | 0.491 | 0.507  | 0.515 | 0.581 |
| 1.069  | 0.67  | 0.494 | 0.499  | 0.537 | 0.58  |
| 0.757  | 0.676 | 0.499 | 0.513  | 0.521 | 0.538 |
| 0.467  | 0.658 | 0.475 | 0.503  | 0.514 | 0.561 |
| 0.405  | 0.18  | 0.285 | 0.28   | 0.259 | 0.245 |
| 0.468  | 0.391 | 0.333 | 0.266  | 0.252 | 0.25  |
| 0.137  | 0.302 | 0.303 | 0.279  | 0.277 | 0.29  |
| 0.308  | 0.241 | 0.308 | 0.263  | 0.304 | 0.279 |
| 0.433  | 0.426 | 0.448 | 0.439  | 0.428 | 0.435 |
| 0.413  | 0.44  | 0.441 | 0.431  | 0.434 | 0.452 |
| 0.427  | 0.41  | 0.414 | 0.428  | 0.42  | 0.441 |
| 0.368  | 0.404 | 0.415 | 0.404  | 0.409 | 0.427 |
| 0.58   | 0.591 | 0.579 | 0.5737 | 0.576 | 0.599 |
| 0.575  | 0.59  | 0.578 | 0.585  | 0.584 | 0.574 |
| 0.604  | 0.596 | 0.574 | 0.579  | 0.573 | 0.561 |
| 0.571  | 0.593 | 0.568 | 0.557  | 0.571 | 0.564 |

|       |       |       |       |       |       |
|-------|-------|-------|-------|-------|-------|
| 0.936 | 0.797 | 0.824 | 0.677 | 0.709 | 0.741 |
| 0.864 | 0.866 | 0.836 | 0.682 | 0.733 | 0.75  |
| 0.885 | 0.832 | 0.745 | 0.731 | 0.706 | 0.705 |
| 0.895 | 0.833 | 0.774 | 0.693 | 0.695 | 0.68  |
| 0.656 | 0.568 | 0.523 | 0.563 | 0.536 | 0.576 |
| 0.681 | 0.57  | 0.53  | 0.567 | 0.548 | 0.59  |
| 0.577 | 0.574 | 0.531 | 0.558 | 0.539 | 0.575 |
| 0.565 | 0.58  | 0.526 | 0.578 | 0.558 | 0.587 |
| 0.083 | 0.071 | 0.086 | 0.073 | 0.055 | 0.1   |
| 0.072 | 0.086 | 0.079 | 0.057 | 0.06  | 0.093 |
| 0.081 | 0.096 | 0.099 | 0.091 | 0.072 | 0.075 |
| 0.049 | 0.091 | 0.082 | 0.078 | 0.07  | 0.081 |
| 0.316 | 0.279 | 0.266 | 0.308 | 0.307 | 0.317 |
| 0.311 | 0.28  | 0.299 | 0.28  | 0.278 | 0.288 |
| 0.333 | 0.293 | 0.299 | 0.312 | 0.293 | 0.32  |
| 0.281 | 0.26  | 0.25  | 0.302 | 0.275 | 0.287 |
| 0.543 | 0.555 | 0.499 | 0.513 | 0.515 | 0.556 |
| 0.567 | 0.574 | 0.59  | 0.512 | 0.521 | 0.56  |
| 0.594 | 0.587 | 0.595 | 0.604 | 0.598 | 0.626 |
| 0.432 | 0.499 | 0.51  | 0.555 | 0.504 | 0.559 |
| 0.414 | 0.369 | 0.367 | 0.412 | 0.413 | 0.432 |
| 0.386 | 0.359 | 0.381 | 0.388 | 0.386 | 0.409 |
| 0.422 | 0.362 | 0.388 | 0.43  | 0.401 | 0.435 |
| 0.349 | 0.36  | 0.346 | 0.42  | 0.403 | 0.455 |
| 0.647 | 0.628 | 0.664 | 0.647 | 0.736 | 0.749 |
| 0.655 | 0.656 | 0.644 | 0.654 | 0.686 | 0.689 |
| 0.65  | 0.595 | 0.648 | 0.741 | 0.672 | 0.685 |
| 0.582 | 0.625 | 0.652 | 0.709 | 0.684 | 0.725 |
| 0.737 | 0.6   | 0.67  | 0.653 | 0.661 | 0.696 |
| 0.561 | 0.566 | 0.603 | 0.602 | 0.585 | 0.539 |
| 0.741 | 0.765 | 0.703 | 0.734 | 0.746 | 0.73  |
| 0.575 | 0.623 | 0.628 | 0.852 | 0.811 | 0.68  |
| 0.733 | 0.651 | 0.625 | 0.546 | 0.678 | 0.569 |
| 0.634 | 0.658 | 0.618 | 0.657 | 0.634 | 0.629 |
| 0.614 | 0.705 | 0.555 | 0.62  | 0.674 | 0.523 |
| 0.54  | 0.62  | 0.58  | 0.665 | 0.659 | 0.738 |

|        |       |        |       |        |       |
|--------|-------|--------|-------|--------|-------|
| 0.51   | 0.762 | 0.899  | 0.778 | 0.81   | 0.814 |
| 0.405  | 0.697 | 0.835  | 0.727 | 0.792  | 0.695 |
| 0.594  | 0.857 | 0.853  | 0.953 | 0.84   | 0.753 |
| 0.379  | 0.622 | 0.725  | 0.86  | 0.848  | 0.774 |
| 0.353  | 0.619 | 0.907  | 1.071 | 1.028  | 1.033 |
| 0.249  | 0.46  | 0.843  | 0.857 | 0.844  | 0.813 |
| 0.27   | 0.429 | 0.715  | 0.875 | 0.84   | 0.824 |
| 0.296  | 0.414 | 0.574  | 0.815 | 0.709  | 0.788 |
| 0.912  | 0.643 | 0.599  | 0.672 | 0.6867 | 0.652 |
| 0.881  | 0.729 | 0.652  | 0.658 | 0.686  | 0.669 |
| 1.113  | 0.789 | 0.68   | 0.753 | 0.721  | 0.661 |
| 0.681  | 0.592 | 0.531  | 0.674 | 0.653  | 0.635 |
| 0.809  | 0.722 | 0.763  | 0.716 | 0.775  | 0.758 |
| 0.818  | 0.752 | 0.778  | 0.734 | 0.814  | 0.763 |
| 0.873  | 0.772 | 0.794  | 0.881 | 0.816  | 0.87  |
| 0.712  | 0.68  | 0.71   | 0.715 | 0.762  | 0.711 |
| 0.667  | 0.59  | 0.627  | 0.685 | 0.647  | 0.814 |
| 0.595  | 0.609 | 0.666  | 0.634 | 0.604  | 0.703 |
| 0.63   | 0.618 | 0.748  | 0.711 | 0.666  | 0.738 |
| 0.6307 | 0.584 | 0.55   | 0.683 | 0.656  | 0.917 |
| 0.556  | 0.596 | 0.667  | 0.642 | 0.59   | 0.555 |
| 0.684  | 0.605 | 0.603  | 0.6   | 0.568  | 0.609 |
| 0.719  | 0.608 | 0.708  | 0.708 | 0.615  | 0.712 |
| 0.48   | 0.51  | 0.6593 | 0.612 | 0.541  | 0.64  |
| 0.805  | 0.772 | 0.726  | 0.764 | 0.784  | 0.837 |
| 0.776  | 0.754 | 0.701  | 0.705 | 0.726  | 0.771 |
| 0.907  | 0.773 | 0.789  | 0.802 | 0.783  | 0.84  |
| 0.645  | 0.738 | 0.639  | 0.832 | 0.85   | 0.908 |
| 0.206  | 0.216 | 0.249  | 0.268 | 0.237  | 0.287 |
| 0.193  | 0.205 | 0.238  | 0.21  | 0.215  | 0.24  |
| 0.237  | 0.214 | 0.258  | 0.261 | 0.242  | 0.28  |
| 0.186  | 0.208 | 0.21   | 0.245 | 0.242  | 0.272 |
| 0.556  | 0.272 | 0.22   | 0.228 | 0.243  | 0.285 |
| 0.485  | 0.31  | 0.217  | 0.216 | 0.222  | 0.269 |
| 0.646  | 0.294 | 0.249  | 0.251 | 0.254  | 0.278 |
| 0.388  | 0.256 | 0.189  | 0.244 | 0.247  | 0.303 |
| 1.009  | 0.667 | 0.511  | 0.568 | 0.571  | 0.639 |
| 0.827  | 0.667 | 0.495  | 0.517 | 0.515  | 0.556 |
| 0.992  | 0.667 | 0.554  | 0.591 | 0.558  | 0.6   |
| 0.785  | 0.583 | 0.472  | 0.571 | 0.571  | 0.633 |

|       |        |       |       |       |       |
|-------|--------|-------|-------|-------|-------|
| 0.399 | 0.521  | 0.123 | 0.279 | 0.269 | 0.266 |
| 0.636 | 0.418  | 0.387 | 0.244 | 0.321 | 0.298 |
| 0.725 | 0.48   | 0.409 | 0.316 | 0.304 | 0.351 |
| 0.918 | 0.569  | 0.446 | 0.386 | 0.399 | 0.386 |
| 0.454 | 0.438  | 0.466 | 0.47  | 0.517 | 0.485 |
| 0.457 | 0.475  | 0.459 | 0.454 | 0.509 | 0.505 |
| 0.512 | 0.496  | 0.472 | 0.497 | 0.527 | 0.514 |
| 0.426 | 0.444  | 0.422 | 0.45  | 0.532 | 0.479 |
| 0.589 | 0.601  | 0.561 | 0.583 | 0.625 | 0.617 |
| 0.623 | 0.641  | 0.597 | 0.578 | 0.651 | 0.662 |
| 0.711 | 0.682  | 0.621 | 0.657 | 0.686 | 0.765 |
| 0.598 | 0.626  | 0.6   | 0.701 | 0.678 | 0.738 |
| 1.323 | 1.035  | 0.859 | 0.889 | 0.858 | 0.975 |
| 1.291 | 1.152  | 0.973 | 0.926 | 0.887 | 0.979 |
| 1.566 | 1.134  | 1.015 | 1     | 0.947 | 1.099 |
| 0.906 | 0.849  | 0.706 | 0.948 | 0.81  | 0.909 |
| 0.755 | 0.711  | 0.694 | 0.732 | 0.714 | 0.755 |
| 0.771 | 0.77   | 0.72  | 0.736 | 0.757 | 0.732 |
| 0.855 | 0.758  | 0.714 | 0.747 | 0.751 | 0.766 |
| 0.691 | 0.685  | 0.677 | 0.76  | 0.745 | 0.752 |
| 0.065 | 0.056  | 0.058 | 0.062 | 0.056 | 0.082 |
| 0.054 | 0.065  | 0.053 | 0.057 | 0.053 | 0.056 |
| 0.074 | 0.0577 | 0.067 | 0.077 | 0.077 | 0.075 |
| 0.04  | 0.052  | 0.047 | 0.08  | 0.073 | 0.081 |
| 0.282 | 0.237  | 0.263 | 0.249 | 0.251 | 0.262 |
| 0.29  | 0.276  | 0.281 | 0.269 | 0.288 | 0.285 |
| 0.303 | 0.321  | 0.274 | 0.286 | 0.292 | 0.315 |
| 0.375 | 0.364  | 0.298 | 0.321 | 0.341 | 0.367 |
| 0.525 | 0.477  | 0.491 | 0.458 | 0.457 | 0.491 |
| 0.562 | 0.555  | 0.526 | 0.528 | 0.541 | 0.538 |
| 0.55  | 0.55   | 0.494 | 0.496 | 0.488 | 0.496 |
| 0.582 | 0.578  | 0.462 | 0.536 | 0.549 | 0.527 |
| 0.378 | 0.378  | 0.388 | 0.402 | 0.373 | 0.373 |
| 0.373 | 0.402  | 0.369 | 0.401 | 0.391 | 0.399 |
| 0.412 | 0.486  | 0.398 | 0.458 | 0.432 | 0.468 |
| 0.453 | 0.483  | 0.381 | 0.456 | 0.462 | 0.443 |

|       |       |        |        |        |        |
|-------|-------|--------|--------|--------|--------|
| 0.655 | 0.556 | 0.608  | 0.631  | 0.582  | 0.614  |
| 0.608 | 0.589 | 0.578  | 0.612  | 0.598  | 0.594  |
| 0.754 | 0.74  | 0.634  | 0.692  | 0.683  | 0.755  |
| 0.781 | 0.748 | 0.602  | 0.771  | 0.722  | 0.661  |
| 0.751 | 0.712 | 0.748  | 0.711  | 0.603  | 0.547  |
| 0.633 | 0.665 | 0.708  | 0.738  | 0.67   | 0.669  |
| 0.77  | 0.792 | 0.7377 | 0.713  | 0.778  | 0.799  |
| 0.833 | 0.761 | 0.757  | 0.7207 | 0.723  | 0.68   |
| 0.629 | 0.559 | 0.693  | 0.681  | 0.594  | 0.688  |
| 0.717 | 0.695 | 0.602  | 0.659  | 0.643  | 0.699  |
| 0.828 | 0.814 | 0.754  | 0.803  | 0.74   | 0.77   |
| 0.957 | 0.878 | 0.854  | 0.878  | 0.729  | 0.719  |
| 0.524 | 0.547 | 0.764  | 0.682  | 0.585  | 0.646  |
| 0.43  | 0.652 | 0.722  | 0.716  | 0.628  | 0.592  |
| 0.543 | 0.719 | 0.767  | 0.762  | 0.686  | 0.679  |
| 0.627 | 0.79  | 0.735  | 0.823  | 0.684  | 0.763  |
| 0.235 | 0.285 | 0.581  | 0.628  | 0.63   | 0.686  |
| 0.187 | 0.308 | 0.502  | 0.598  | 0.631  | 0.601  |
| 0.204 | 0.373 | 0.591  | 0.668  | 0.768  | 0.747  |
| 0.213 | 0.337 | 0.481  | 0.642  | 0.64   | 0.574  |
| 0.976 | 0.587 | 0.584  | 0.626  | 0.6327 | 0.662  |
| 0.954 | 0.761 | 0.646  | 0.65   | 0.631  | 0.705  |
| 0.93  | 0.743 | 0.64   | 0.667  | 0.627  | 0.666  |
| 1.078 | 0.899 | 0.581  | 0.655  | 0.64   | 0.6777 |
| 0.733 | 0.675 | 0.75   | 0.698  | 0.704  | 0.739  |
| 0.769 | 0.775 | 0.762  | 0.741  | 0.814  | 0.803  |
| 0.737 | 0.741 | 0.701  | 0.7    | 0.697  | 0.801  |
| 0.777 | 0.8   | 0.714  | 0.755  | 0.801  | 0.789  |
| 0.606 | 0.465 | 0.514  | 0.541  | 0.565  | 0.555  |
| 0.604 | 0.555 | 0.539  | 0.564  | 0.668  | 0.619  |
| 0.659 | 0.66  | 0.706  | 0.785  | 0.763  | 0.705  |
| 0.741 | 0.695 | 0.564  | 0.759  | 0.784  | 0.739  |
| 0.631 | 0.523 | 0.543  | 0.565  | 0.6187 | 0.555  |
| 0.743 | 0.628 | 0.589  | 0.623  | 0.611  | 0.604  |
| 0.618 | 0.718 | 0.573  | 0.586  | 0.577  | 0.672  |
| 0.865 | 0.924 | 0.594  | 0.5913 | 0.668  | 0.6103 |
| 0.868 | 0.652 | 0.726  | 0.703  | 0.696  | 0.807  |
| 0.797 | 0.759 | 0.705  | 0.719  | 0.739  | 0.717  |
| 0.909 | 0.88  | 0.871  | 0.893  | 0.833  | 0.915  |

|        |        |       |       |       |        |
|--------|--------|-------|-------|-------|--------|
| 1.011  | 1.046  | 0.713 | 0.875 | 0.868 | 0.951  |
| 0.213  | 0.204  | 0.231 | 0.24  | 0.224 | 0.248  |
| 0.196  | 0.225  | 0.219 | 0.24  | 0.236 | 0.237  |
| 0.216  | 0.264  | 0.261 | 0.276 | 0.273 | 0.313  |
| 0.235  | 0.272  | 0.223 | 0.277 | 0.272 | 0.266  |
| 0.707  | 0.247  | 0.236 | 0.212 | 0.232 | 0.268  |
| 0.601  | 0.34   | 0.225 | 0.208 | 0.256 | 0.279  |
| 0.663  | 0.378  | 0.297 | 0.269 | 0.312 | 0.324  |
| 0.879  | 0.425  | 0.248 | 0.273 | 0.313 | 0.333  |
| 1.079  | 0.618  | 0.514 | 0.587 | 0.547 | 0.579  |
| 0.987  | 0.692  | 0.519 | 0.575 | 0.571 | 0.587  |
| 1.001  | 0.763  | 0.58  | 0.655 | 0.622 | 0.661  |
| 1.484  | 0.823  | 0.524 | 0.692 | 0.646 | 0.697  |
| 0.626  | 0.931  | 0.35  | 0.49  | 0.455 | 0.351  |
| 0.807  | 0.439  | 0.393 | 0.301 | 0.476 | 0.406  |
| 0.696  | 0.481  | 0.426 | 0.443 | 0.438 | 0.41   |
| 0.872  | 0.72   | 0.532 | 0.537 | 0.577 | 0.513  |
| 0.468  | 0.393  | 0.447 | 0.426 | 0.441 | 0.469  |
| 0.476  | 0.487  | 0.51  | 0.501 | 0.488 | 0.489  |
| 0.47   | 0.452  | 0.463 | 0.467 | 0.461 | 0.49   |
| 0.495  | 0.536  | 0.439 | 0.476 | 0.475 | 0.4827 |
| 0.635  | 0.561  | 0.637 | 0.621 | 0.585 | 0.569  |
| 0.669  | 0.638  | 0.646 | 0.621 | 0.646 | 0.605  |
| 0.713  | 0.702  | 0.713 | 0.717 | 0.741 | 0.694  |
| 0.733  | 0.717  | 0.646 | 0.719 | 0.749 | 0.707  |
| 1.191  | 0.893  | 0.816 | 0.815 | 0.787 | 0.788  |
| 1.189  | 1.16   | 0.995 | 0.924 | 0.963 | 0.927  |
| 1.187  | 1.202  | 0.998 | 0.982 | 0.95  | 0.904  |
| 1.284  | 1.254  | 0.708 | 0.916 | 0.956 | 0.871  |
| 0.799  | 0.82   | 0.783 | 0.73  | 0.691 | 0.754  |
| 0.791  | 0.759  | 0.771 | 0.744 | 0.764 | 0.763  |
| 0.794  | 0.844  | 0.738 | 0.747 | 0.791 | 0.838  |
| 0.937  | 0.857  | 0.795 | 0.852 | 0.87  | 0.83   |
| 0.085  | 0.0933 | 0.066 | 0.082 | 0.075 | 0.108  |
| 0.0847 | 0.079  | 0.077 | 0.063 | 0.074 | 0.077  |
| 0.078  | 0.108  | 0.092 | 0.084 | 0.095 | 0.138  |
| 0.091  | 0.093  | 0.062 | 0.075 | 0.075 | 0.103  |

|       |       |       |        |        |       |
|-------|-------|-------|--------|--------|-------|
| 0.294 | 0.269 | 0.269 | 0.266  | 0.271  | 0.293 |
| 0.316 | 0.274 | 0.273 | 0.258  | 0.266  | 0.283 |
| 0.278 | 0.299 | 0.295 | 0.294  | 0.303  | 0.322 |
| 0.306 | 0.295 | 0.298 | 0.314  | 0.297  | 0.322 |
| 0.489 | 0.404 | 0.451 | 0.436  | 0.407  | 0.443 |
| 0.507 | 0.423 | 0.444 | 0.422  | 0.395  | 0.427 |
| 0.486 | 0.469 | 0.477 | 0.471  | 0.448  | 0.469 |
| 0.522 | 0.445 | 0.489 | 0.502  | 0.443  | 0.468 |
| 0.409 | 0.411 | 0.399 | 0.378  | 0.386  | 0.413 |
| 0.39  | 0.416 | 0.397 | 0.373  | 0.385  | 0.401 |
| 0.394 | 0.413 | 0.38  | 0.358  | 0.376  | 0.375 |
| 0.385 | 0.411 | 0.383 | 0.365  | 0.376  | 0.383 |
| 0.691 | 0.654 | 0.693 | 0.618  | 0.653  | 0.667 |
| 0.672 | 0.647 | 0.686 | 0.603  | 0.661  | 0.679 |
| 0.669 | 0.646 | 0.664 | 0.612  | 0.651  | 0.628 |
| 0.657 | 0.658 | 0.659 | 0.615  | 0.669  | 0.651 |
| 0.794 | 0.86  | 0.818 | 0.6743 | 0.664  | 0.828 |
| 0.649 | 0.812 | 0.683 | 0.695  | 0.643  | 0.722 |
| 0.766 | 0.729 | 0.675 | 0.685  | 0.586  | 0.612 |
| 0.656 | 0.647 | 0.581 | 0.643  | 0.581  | 0.608 |
| 0.589 | 0.67  | 0.709 | 0.564  | 0.608  | 0.561 |
| 0.641 | 0.712 | 0.687 | 0.584  | 0.603  | 0.652 |
| 0.712 | 0.652 | 0.649 | 0.617  | 0.564  | 0.553 |
| 0.647 | 0.605 | 0.611 | 0.618  | 0.556  | 0.569 |
| 0.457 | 0.665 | 0.8   | 0.791  | 0.647  | 0.663 |
| 0.37  | 0.751 | 0.744 | 0.711  | 0.5903 | 0.601 |
| 0.512 | 0.579 | 0.67  | 0.664  | 0.563  | 0.486 |
| 0.392 | 0.563 | 0.611 | 0.633  | 0.561  | 0.503 |
| 0.309 | 0.442 | 0.678 | 0.551  | 0.537  | 0.623 |
| 0.25  | 0.506 | 0.561 | 0.551  | 0.579  | 0.609 |
| 0.378 | 0.372 | 0.464 | 0.516  | 0.513  | 0.44  |
| 0.298 | 0.366 | 0.457 | 0.586  | 0.519  | 0.478 |
| 0.497 | 0.328 | 0.313 | 0.303  | 0.299  | 0.334 |
| 0.516 | 0.397 | 0.31  | 0.259  | 0.296  | 0.291 |
| 0.485 | 0.397 | 0.366 | 0.337  | 0.35   | 0.341 |
| 0.492 | 0.364 | 0.334 | 0.343  | 0.312  | 0.383 |
| 0.321 | 0.322 | 0.334 | 0.329  | 0.33   | 0.327 |
| 0.354 | 0.33  | 0.308 | 0.318  | 0.323  | 0.318 |

|       |        |       |        |       |        |
|-------|--------|-------|--------|-------|--------|
| 0.334 | 0.386  | 0.373 | 0.357  | 0.369 | 0.386  |
| 0.406 | 0.365  | 0.399 | 0.3347 | 0.343 | 0.408  |
| 0.39  | 0.374  | 0.397 | 0.413  | 0.372 | 0.3717 |
| 0.311 | 0.376  | 0.338 | 0.334  | 0.347 | 0.399  |
| 0.366 | 0.36   | 0.369 | 0.323  | 0.327 | 0.356  |
| 0.319 | 0.333  | 0.33  | 0.383  | 0.345 | 0.36   |
| 0.557 | 0.577  | 0.576 | 0.574  | 0.527 | 0.594  |
| 0.668 | 0.573  | 0.531 | 0.505  | 0.615 | 0.573  |
| 0.589 | 0.696  | 0.667 | 0.64   | 0.679 | 0.748  |
| 0.602 | 0.662  | 0.7   | 0.802  | 0.638 | 0.791  |
| 0.78  | 0.738  | 0.698 | 0.697  | 0.626 | 0.71   |
| 0.721 | 0.733  | 0.679 | 0.657  | 0.612 | 0.706  |
| 0.745 | 0.692  | 0.661 | 0.641  | 0.592 | 0.642  |
| 0.691 | 0.682  | 0.644 | 0.651  | 0.587 | 0.655  |
| 0.228 | 0.231  | 0.243 | 0.251  | 0.245 | 0.265  |
| 0.201 | 0.242  | 0.238 | 0.236  | 0.234 | 0.255  |
| 0.233 | 0.235  | 0.232 | 0.226  | 0.229 | 0.223  |
| 0.217 | 0.23   | 0.226 | 0.23   | 0.231 | 0.234  |
| 0.547 | 0.366  | 0.258 | 0.266  | 0.247 | 0.302  |
| 0.504 | 0.341  | 0.243 | 0.244  | 0.252 | 0.286  |
| 0.571 | 0.316  | 0.206 | 0.202  | 0.196 | 0.215  |
| 0.507 | 0.285  | 0.206 | 0.213  | 0.206 | 0.234  |
| 1.029 | 0.642  | 0.518 | 0.508  | 0.509 | 0.562  |
| 0.927 | 0.637  | 0.498 | 0.482  | 0.509 | 0.571  |
| 1     | 0.591  | 0.477 | 0.453  | 0.476 | 0.496  |
| 0.93  | 0.597  | 0.481 | 0.459  | 0.465 | 0.502  |
| 0.565 | 0.373  | 0.405 | 0.363  | 0.402 | 0.403  |
| 0.509 | 0.601  | 0.457 | 0.342  | 0.452 | 0.338  |
| 0.378 | 0.353  | 0.417 | 0.295  | 0.289 | 0.253  |
| 0.378 | 0.531  | 0.397 | 0.27   | 0.301 | 0.267  |
| 0.47  | 0.4793 | 0.458 | 0.458  | 0.445 | 0.448  |
| 0.482 | 0.479  | 0.453 | 0.436  | 0.429 | 0.454  |
| 0.465 | 0.479  | 0.482 | 0.466  | 0.448 | 0.445  |
| 0.516 | 0.48   | 0.479 | 0.4533 | 0.442 | 0.449  |
| 0.569 | 0.556  | 0.575 | 0.543  | 0.546 | 0.556  |
| 0.607 | 0.564  | 0.591 | 0.55   | 0.541 | 0.561  |
| 0.573 | 0.607  | 0.607 | 0.575  | 0.577 | 0.578  |
| 0.603 | 0.598  | 0.612 | 0.596  | 0.572 | 0.591  |
| 0.896 | 0.794  | 0.651 | 0.616  | 0.598 | 0.603  |

|       |       |       |        |        |       |
|-------|-------|-------|--------|--------|-------|
| 0.985 | 0.82  | 0.648 | 0.602  | 0.593  | 0.629 |
| 0.855 | 0.932 | 0.766 | 0.74   | 0.736  | 0.807 |
| 1.008 | 0.919 | 0.871 | 0.916  | 0.696  | 0.878 |
| 0.637 | 0.619 | 0.639 | 0.65   | 0.658  | 0.653 |
| 0.613 | 0.621 | 0.639 | 0.643  | 0.667  | 0.628 |
| 0.7   | 0.607 | 0.608 | 0.61   | 0.641  | 0.608 |
| 0.667 | 0.595 | 0.616 | 0.618  | 0.639  | 0.601 |
| 0.092 | 0.093 | 0.076 | 0.07   | 0.0497 | 0.074 |
| 0.08  | 0.093 | 0.059 | 0.0567 | 0.048  | 0.071 |
| 0.103 | 0.07  | 0.058 | 0.044  | 0.049  | 0.052 |
| 0.075 | 0.07  | 0.054 | 0.056  | 0.052  | 0.063 |
| 0.274 | 0.28  | 0.275 | 0.279  | 0.269  | 0.277 |
| 0.284 | 0.284 | 0.282 | 0.267  | 0.27   | 0.277 |
| 0.285 | 0.286 | 0.276 | 0.279  | 0.279  | 0.286 |
| 0.28  | 0.286 | 0.272 | 0.277  | 0.269  | 0.279 |
| 0.514 | 0.434 | 0.436 | 0.447  | 0.428  | 0.444 |
| 0.511 | 0.441 | 0.429 | 0.433  | 0.426  | 0.45  |
| 0.518 | 0.474 | 0.436 | 0.452  | 0.431  | 0.445 |
| 0.523 | 0.476 | 0.431 | 0.446  | 0.423  | 0.441 |
| 0.368 | 0.272 | 0.317 | 0.332  | 0.346  | 0.355 |
| 0.4   | 0.302 | 0.322 | 0.322  | 0.338  | 0.353 |
| 0.277 | 0.389 | 0.38  | 0.371  | 0.373  | 0.379 |
| 0.372 | 0.381 | 0.367 | 0.349  | 0.369  | 0.369 |
| 0.61  | 0.577 | 0.576 | 0.566  | 0.604  | 0.639 |
| 0.64  | 0.59  | 0.571 | 0.533  | 0.607  | 0.616 |
| 0.577 | 0.638 | 0.618 | 0.585  | 0.642  | 0.655 |
| 0.61  | 0.623 | 0.599 | 0.561  | 0.639  | 0.637 |
| 0.626 | 0.581 | 0.588 | 0.657  | 0.539  | 0.601 |
| 0.587 | 0.696 | 0.558 | 0.597  | 0.496  | 0.564 |
| 0.594 | 0.713 | 0.654 | 0.678  | 0.526  | 0.602 |
| 0.563 | 0.611 | 0.53  | 0.569  | 0.513  | 0.532 |
| 0.591 | 0.513 | 0.562 | 0.593  | 0.502  | 0.549 |
| 0.639 | 0.561 | 0.543 | 0.574  | 0.53   | 0.558 |
| 0.524 | 0.626 | 0.594 | 0.639  | 0.565  | 0.592 |
| 0.574 | 0.591 | 0.581 | 0.604  | 0.566  | 0.578 |
| 0.53  | 0.697 | 0.811 | 0.847  | 0.709  | 0.733 |

|        |       |       |        |       |        |
|--------|-------|-------|--------|-------|--------|
| 0.536  | 0.822 | 0.778 | 0.793  | 0.749 | 0.743  |
| 0.502  | 0.788 | 0.797 | 0.832  | 0.752 | 0.7367 |
| 0.512  | 0.793 | 0.795 | 0.808  | 0.751 | 0.734  |
| 0.438  | 0.631 | 0.834 | 0.963  | 0.895 | 0.949  |
| 0.46   | 0.696 | 0.779 | 0.914  | 0.831 | 0.845  |
| 0.377  | 0.709 | 0.867 | 0.98   | 0.899 | 0.98   |
| 0.428  | 0.725 | 0.809 | 0.977  | 0.9   | 0.899  |
| 0.461  | 0.38  | 0.342 | 0.341  | 0.342 | 0.401  |
| 0.505  | 0.409 | 0.308 | 0.3307 | 0.34  | 0.38   |
| 0.547  | 0.41  | 0.34  | 0.33   | 0.314 | 0.321  |
| 0.512  | 0.408 | 0.329 | 0.321  | 0.318 | 0.331  |
| 0.371  | 0.335 | 0.365 | 0.364  | 0.361 | 0.362  |
| 0.35   | 0.356 | 0.325 | 0.345  | 0.323 | 0.335  |
| 0.344  | 0.352 | 0.346 | 0.326  | 0.326 | 0.332  |
| 0.332  | 0.33  | 0.325 | 0.334  | 0.348 | 0.339  |
| 0.375  | 0.367 | 0.363 | 0.368  | 0.36  | 0.386  |
| 0.319  | 0.383 | 0.348 | 0.368  | 0.353 | 0.386  |
| 0.37   | 0.386 | 0.367 | 0.362  | 0.352 | 0.367  |
| 0.362  | 0.37  | 0.342 | 0.349  | 0.362 | 0.353  |
| 0.666  | 0.827 | 0.811 | 0.838  | 0.742 | 0.763  |
| 0.624  | 0.839 | 0.696 | 0.785  | 0.66  | 0.655  |
| 0.6573 | 0.714 | 0.672 | 0.736  | 0.601 | 0.622  |
| 0.682  | 0.616 | 0.58  | 0.677  | 0.595 | 0.609  |
| 0.72   | 0.675 | 0.684 | 0.632  | 0.67  | 0.676  |
| 0.762  | 0.682 | 0.655 | 0.609  | 0.673 | 0.662  |
| 0.664  | 0.775 | 0.733 | 0.682  | 0.718 | 0.718  |
| 0.721  | 0.728 | 0.699 | 0.647  | 0.736 | 0.708  |
| 0.212  | 0.208 | 0.227 | 0.236  | 0.226 | 0.234  |
| 0.225  | 0.215 | 0.22  | 0.228  | 0.218 | 0.234  |
| 0.186  | 0.244 | 0.25  | 0.254  | 0.231 | 0.246  |
| 0.208  | 0.23  | 0.232 | 0.241  | 0.243 | 0.247  |
| 0.547  | 0.252 | 0.208 | 0.217  | 0.221 | 0.249  |
| 0.599  | 0.263 | 0.202 | 0.211  | 0.213 | 0.252  |
| 0.4    | 0.311 | 0.227 | 0.228  | 0.222 | 0.273  |
| 0.528  | 0.291 | 0.218 | 0.227  | 0.235 | 0.27   |
| 0.925  | 0.609 | 0.524 | 0.5097 | 0.548 | 0.593  |
| 0.923  | 0.636 | 0.529 | 0.528  | 0.515 | 0.569  |
| 0.755  | 0.693 | 0.527 | 0.512  | 0.512 | 0.559  |
| 0.993  | 0.649 | 0.492 | 0.489  | 0.512 | 0.531  |

|        |        |       |       |       |       |
|--------|--------|-------|-------|-------|-------|
| 0.446  | 0.172  | 0.297 | 0.279 | 0.278 | 0.265 |
| 0.512  | 0.439  | 0.349 | 0.259 | 0.292 | 0.258 |
| 0.132  | 0.299  | 0.371 | 0.308 | 0.325 | 0.306 |
| 0.292  | 0.474  | 0.389 | 0.321 | 0.33  | 0.334 |
| 0.503  | 0.426  | 0.481 | 0.471 | 0.462 | 0.49  |
| 0.506  | 0.446  | 0.473 | 0.466 | 0.464 | 0.483 |
| 0.481  | 0.48   | 0.501 | 0.493 | 0.461 | 0.51  |
| 0.518  | 0.481  | 0.466 | 0.467 | 0.453 | 0.47  |
| 0.581  | 0.591  | 0.583 | 0.562 | 0.573 | 0.6   |
| 0.596  | 0.593  | 0.577 | 0.551 | 0.569 | 0.607 |
| 0.5953 | 0.577  | 0.549 | 0.538 | 0.568 | 0.591 |
| 0.609  | 0.569  | 0.556 | 0.546 | 0.571 | 0.605 |
| 0.832  | 0.736  | 0.607 | 0.633 | 0.644 | 0.598 |
| 0.859  | 0.796  | 0.604 | 0.63  | 0.615 | 0.645 |
| 0.785  | 0.878  | 0.635 | 0.689 | 0.682 | 0.645 |
| 0.802  | 0.845  | 0.675 | 0.746 | 0.683 | 0.703 |
| 0.63   | 0.558  | 0.546 | 0.562 | 0.591 | 0.629 |
| 0.65   | 0.586  | 0.557 | 0.573 | 0.595 | 0.637 |
| 0.575  | 0.626  | 0.603 | 0.617 | 0.588 | 0.656 |
| 0.647  | 0.589  | 0.541 | 0.569 | 0.604 | 0.667 |
| 0.077  | 0.06   | 0.059 | 0.065 | 0.056 | 0.095 |
| 0.079  | 0.059  | 0.041 | 0.046 | 0.047 | 0.09  |
| 0.078  | 0.086  | 0.065 | 0.069 | 0.06  | 0.097 |
| 0.074  | 0.074  | 0.048 | 0.054 | 0.058 | 0.081 |
| 0.2913 | 0.2837 | 0.282 | 0.282 | 0.266 | 0.28  |
| 0.292  | 0.273  | 0.297 | 0.29  | 0.271 | 0.289 |
| 0.292  | 0.289  | 0.293 | 0.35  | 0.27  | 0.291 |
| 0.29   | 0.289  | 0.318 | 0.323 | 0.259 | 0.292 |
| 0.445  | 0.437  | 0.41  | 0.418 | 0.423 | 0.438 |
| 0.538  | 0.447  | 0.481 | 0.459 | 0.444 | 0.461 |
| 0.544  | 0.475  | 0.418 | 0.437 | 0.43  | 0.453 |
| 0.534  | 0.498  | 0.447 | 0.453 | 0.422 | 0.474 |
| 0.357  | 0.356  | 0.39  | 0.346 | 0.357 | 0.367 |
| 0.363  | 0.355  | 0.422 | 0.373 | 0.385 | 0.397 |
| 0.383  | 0.369  | 0.38  | 0.349 | 0.339 | 0.356 |
| 0.377  | 0.387  | 0.407 | 0.359 | 0.335 | 0.36  |

|        |       |       |       |        |       |
|--------|-------|-------|-------|--------|-------|
| 0.603  | 0.606 | 0.648 | 0.638 | 0.662  | 0.677 |
| 0.644  | 0.616 | 0.697 | 0.687 | 0.683  | 0.704 |
| 0.703  | 0.672 | 0.603 | 0.634 | 0.605  | 0.639 |
| 0.661  | 0.67  | 0.655 | 0.647 | 0.61   | 0.634 |
| 0.688  | 0.798 | 0.94  | 0.813 | 0.714  | 0.789 |
| 0.795  | 0.663 | 0.939 | 0.874 | 0.891  | 0.789 |
| 0.918  | 0.78  | 0.756 | 0.726 | 0.635  | 0.828 |
| 0.837  | 0.84  | 0.952 | 0.907 | 0.658  | 0.802 |
| 0.625  | 0.561 | 0.613 | 0.573 | 0.554  | 0.552 |
| 0.623  | 0.652 | 0.652 | 0.648 | 0.643  | 0.538 |
| 0.6263 | 0.568 | 0.498 | 0.555 | 0.523  | 0.538 |
| 0.631  | 0.615 | 0.618 | 0.598 | 0.645  | 0.512 |
| 0.459  | 0.798 | 0.84  | 0.762 | 0.658  | 0.885 |
| 0.561  | 0.73  | 0.926 | 0.888 | 0.87   | 0.836 |
| 0.621  | 0.737 | 0.691 | 0.707 | 0.657  | 0.819 |
| 0.593  | 0.827 | 0.893 | 0.845 | 0.743  | 0.808 |
| 0.183  | 0.444 | 0.662 | 0.598 | 0.684  | 0.863 |
| 0.224  | 0.436 | 0.71  | 0.648 | 0.782  | 0.877 |
| 0.278  | 0.437 | 0.577 | 0.594 | 0.671  | 0.712 |
| 0.264  | 0.464 | 0.691 | 0.621 | 0.65   | 0.805 |
| 0.287  | 0.31  | 0.319 | 0.291 | 0.274  | 0.32  |
| 0.559  | 0.264 | 0.33  | 0.336 | 0.346  | 0.308 |
| 0.45   | 0.425 | 0.308 | 0.301 | 0.316  | 0.388 |
| 0.545  | 0.474 | 0.386 | 0.353 | 0.327  | 0.352 |
| 0.565  | 0.599 | 0.686 | 0.608 | 0.587  | 0.585 |
| 0.605  | 0.604 | 0.694 | 0.657 | 0.619  | 0.621 |
| 0.616  | 0.622 | 0.664 | 0.625 | 0.603  | 0.627 |
| 0.661  | 0.678 | 0.701 | 0.627 | 0.586  | 0.619 |
| 0.179  | 0.25  | 0.308 | 0.282 | 0.309  | 0.297 |
| 0.242  | 0.23  | 0.337 | 0.369 | 0.374  | 0.341 |
| 0.316  | 0.316 | 0.246 | 0.299 | 0.26   | 0.319 |
| 0.285  | 0.328 | 0.345 | 0.312 | 0.265  | 0.307 |
| 0.443  | 0.42  | 0.522 | 0.475 | 0.444  | 0.456 |
| 0.569  | 0.446 | 0.516 | 0.439 | 0.408  | 0.477 |
| 0.454  | 0.393 | 0.482 | 0.441 | 0.4313 | 0.459 |
| 0.474  | 0.475 | 0.539 | 0.477 | 0.442  | 0.464 |
| 0.779  | 0.775 | 0.859 | 0.79  | 0.815  | 0.86  |
| 0.854  | 0.799 | 0.944 | 0.887 | 0.9    | 0.91  |
| 0.927  | 0.86  | 0.768 | 0.778 | 0.776  | 0.849 |
| 0.888  | 0.911 | 0.983 | 0.799 | 0.739  | 0.892 |

|       |        |       |       |       |       |
|-------|--------|-------|-------|-------|-------|
| 0.18  | 0.211  | 0.236 | 0.244 | 0.229 | 0.243 |
| 0.189 | 0.215  | 0.267 | 0.27  | 0.257 | 0.264 |
| 0.226 | 0.217  | 0.205 | 0.24  | 0.213 | 0.229 |
| 0.208 | 0.229  | 0.246 | 0.24  | 0.207 | 0.244 |
| 0.483 | 0.259  | 0.229 | 0.218 | 0.221 | 0.266 |
| 0.573 | 0.237  | 0.276 | 0.25  | 0.262 | 0.296 |
| 0.593 | 0.337  | 0.201 | 0.208 | 0.212 | 0.269 |
| 0.572 | 0.349  | 0.244 | 0.221 | 0.212 | 0.268 |
| 0.81  | 0.594  | 0.54  | 0.524 | 0.553 | 0.599 |
| 0.855 | 0.569  | 0.623 | 0.573 | 0.643 | 0.651 |
| 0.904 | 0.688  | 0.482 | 0.487 | 0.54  | 0.616 |
| 0.86  | 0.59   | 0.581 | 0.55  | 0.54  | 0.612 |
| 0.527 | 0.51   | 0.364 | 0.353 | 0.326 | 0.316 |
| 0.694 | 0.725  | 0.298 | 0.386 | 0.369 | 0.338 |
| 0.406 | 0.384  | 0.526 | 0.316 | 0.334 | 0.314 |
| 0.335 | 0.673  | 0.451 | 0.407 | 0.382 | 0.313 |
| 0.421 | 0.426  | 0.541 | 0.489 | 0.494 | 0.462 |
| 0.487 | 0.4677 | 0.575 | 0.545 | 0.521 | 0.497 |
| 0.462 | 0.463  | 0.505 | 0.557 | 0.483 | 0.463 |
| 0.524 | 0.514  | 0.565 | 0.542 | 0.477 | 0.517 |
| 0.531 | 0.524  | 0.583 | 0.524 | 0.555 | 0.545 |
| 0.597 | 0.53   | 0.604 | 0.543 | 0.562 | 0.55  |
| 0.573 | 0.557  | 0.599 | 0.632 | 0.577 | 0.55  |
| 0.611 | 0.582  | 0.652 | 0.615 | 0.573 | 0.559 |
| 0.73  | 0.809  | 0.87  | 0.648 | 0.623 | 0.667 |
| 0.905 | 0.783  | 0.802 | 0.773 | 0.729 | 0.804 |
| 0.976 | 0.982  | 0.85  | 0.732 | 0.668 | 0.727 |
| 0.986 | 0.856  | 0.823 | 0.741 | 0.645 | 0.733 |
| 0.659 | 0.647  | 0.658 | 0.625 | 0.636 | 0.639 |
| 0.734 | 0.604  | 0.658 | 0.65  | 0.64  | 0.627 |
| 0.734 | 0.641  | 0.61  | 0.607 | 0.641 | 0.641 |
| 0.741 | 0.668  | 0.658 | 0.651 | 0.643 | 0.621 |
| 0.041 | 0.051  | 0.103 | 0.084 | 0.079 | 0.167 |
| 0.078 | 0.056  | 0.189 | 0.129 | 0.149 | 0.236 |
| 0.12  | 0.094  | 0.052 | 0.069 | 0.072 | 0.157 |
| 0.102 | 0.137  | 0.129 | 0.092 | 0.072 | 0.194 |

|        |       |       |        |        |        |
|--------|-------|-------|--------|--------|--------|
| 0.3033 | 0.29  | 0.299 | 0.288  | 0.294  | 0.277  |
| 0.306  | 0.299 | 0.292 | 0.292  | 0.291  | 0.284  |
| 0.306  | 0.297 | 0.284 | 0.282  | 0.288  | 0.276  |
| 0.298  | 0.306 | 0.291 | 0.288  | 0.291  | 0.281  |
| 0.463  | 0.43  | 0.479 | 0.434  | 0.453  | 0.489  |
| 0.522  | 0.483 | 0.485 | 0.458  | 0.463  | 0.517  |
| 0.515  | 0.456 | 0.452 | 0.405  | 0.424  | 0.468  |
| 0.525  | 0.498 | 0.489 | 0.446  | 0.429  | 0.512  |
| 0.343  | 0.361 | 0.373 | 0.395  | 0.382  | 0.364  |
| 0.354  | 0.394 | 0.395 | 0.412  | 0.38   | 0.362  |
| 0.381  | 0.382 | 0.375 | 0.393  | 0.374  | 0.361  |
| 0.37   | 0.387 | 0.38  | 0.403  | 0.377  | 0.374  |
| 0.642  | 0.608 | 0.694 | 0.704  | 0.647  | 0.671  |
| 0.704  | 0.663 | 0.715 | 0.715  | 0.64   | 0.688  |
| 0.728  | 0.661 | 0.687 | 0.695  | 0.637  | 0.681  |
| 0.714  | 0.689 | 0.706 | 0.714  | 0.631  | 0.708  |
| 0.673  | 0.595 | 0.752 | 0.771  | 0.694  | 0.6817 |
| 0.695  | 0.701 | 0.782 | 0.887  | 0.679  | 0.688  |
| 0.845  | 0.695 | 0.724 | 0.666  | 0.6865 | 0.666  |
| 0.775  | 0.776 | 0.677 | 0.678  | 0.6865 | 0.691  |
| 0.579  | 0.559 | 0.53  | 0.53   | 0.491  | 0.509  |
| 0.508  | 0.515 | 0.576 | 0.523  | 0.497  | 0.579  |
| 0.582  | 0.54  | 0.531 | 0.498  | 0.458  | 0.545  |
| 0.575  | 0.579 | 0.527 | 0.541  | 0.449  | 0.591  |
| 0.505  | 0.668 | 1.029 | 1.072  | 1.048  | 0.903  |
| 0.537  | 0.744 | 1.057 | 1.196  | 0.996  | 1.016  |
| 0.645  | 0.745 | 1.05  | 0.863  | 0.775  | 0.904  |
| 0.604  | 0.807 | 0.921 | 0.704  | 0.899  | 0.957  |
| 0.231  | 0.518 | 0.892 | 1.007  | 0.996  | 1.021  |
| 0.232  | 0.538 | 0.937 | 1.072  | 0.931  | 1.161  |
| 0.291  | 0.523 | 0.848 | 0.939  | 0.83   | 0.96   |
| 0.29   | 0.56  | 0.876 | 0.987  | 0.865  | 0.957  |
| 0.426  | 0.294 | 0.318 | 0.323  | 0.32   | 0.311  |
| 0.531  | 0.355 | 0.341 | 0.3183 | 0.332  | 0.328  |
| 0.525  | 0.392 | 0.353 | 0.307  | 0.324  | 0.364  |
| 0.558  | 0.422 | 0.322 | 0.325  | 0.318  | 0.365  |
| 0.625  | 0.582 | 0.598 | 0.651  | 0.636  | 0.622  |
| 0.637  | 0.605 | 0.627 | 0.655  | 0.63   | 0.68   |
| 0.645  | 0.631 | 0.634 | 0.641  | 0.593  | 0.672  |

|       |        |       |        |       |       |
|-------|--------|-------|--------|-------|-------|
| 0.666 | 0.639  | 0.62  | 0.648  | 0.623 | 0.662 |
| 0.273 | 0.3267 | 0.315 | 0.317  | 0.339 | 0.29  |
| 0.285 | 0.309  | 0.345 | 0.387  | 0.352 | 0.346 |
| 0.336 | 0.309  | 0.317 | 0.302  | 0.296 | 0.334 |
| 0.317 | 0.362  | 0.324 | 0.342  | 0.257 | 0.356 |
| 0.49  | 0.494  | 0.501 | 0.51   | 0.523 | 0.528 |
| 0.488 | 0.488  | 0.542 | 0.569  | 0.546 | 0.567 |
| 0.554 | 0.469  | 0.483 | 0.475  | 0.46  | 0.479 |
| 0.542 | 0.527  | 0.506 | 0.516  | 0.513 | 0.517 |
| 0.71  | 0.682  | 0.666 | 0.693  | 0.67  | 0.744 |
| 0.782 | 0.772  | 0.713 | 0.784  | 0.67  | 0.839 |
| 0.752 | 0.809  | 0.716 | 0.734  | 0.695 | 0.84  |
| 0.768 | 0.843  | 0.752 | 0.78   | 0.662 | 0.926 |
| 0.211 | 0.212  | 0.252 | 0.267  | 0.26  | 0.263 |
| 0.211 | 0.256  | 0.269 | 0.287  | 0.267 | 0.28  |
| 0.237 | 0.248  | 0.25  | 0.269  | 0.25  | 0.264 |
| 0.226 | 0.264  | 0.253 | 0.274  | 0.248 | 0.274 |
| 0.461 | 0.262  | 0.231 | 0.239  | 0.231 | 0.244 |
| 0.583 | 0.324  | 0.248 | 0.2383 | 0.244 | 0.289 |
| 0.639 | 0.341  | 0.228 | 0.23   | 0.227 | 0.285 |
| 0.663 | 0.309  | 0.239 | 0.246  | 0.22  | 0.283 |
| 0.693 | 0.561  | 0.524 | 0.536  | 0.53  | 0.579 |
| 0.78  | 0.653  | 0.552 | 0.5193 | 0.537 | 0.641 |
| 0.876 | 0.667  | 0.519 | 0.5    | 0.47  | 0.612 |
| 0.912 | 0.58   | 0.533 | 0.522  | 0.489 | 0.638 |
| 0.348 | 0.404  | 0.285 | 0.344  | 0.322 | 0.337 |
| 0.568 | 0.681  | 0.376 | 0.332  | 0.369 | 0.326 |
| 0.326 | 0.408  | 0.45  | 0.371  | 0.341 | 0.328 |
| 0.344 | 0.721  | 0.476 | 0.36   | 0.385 | 0.288 |
| 0.429 | 0.386  | 0.438 | 0.414  | 0.408 | 0.433 |
| 0.45  | 0.442  | 0.486 | 0.462  | 0.47  | 0.481 |
| 0.477 | 0.448  | 0.436 | 0.437  | 0.439 | 0.456 |
| 0.47  | 0.46   | 0.476 | 0.449  | 0.432 | 0.47  |
| 0.589 | 0.539  | 0.519 | 0.55   | 0.529 | 0.57  |
| 0.605 | 0.552  | 0.538 | 0.563  | 0.531 | 0.578 |
| 0.592 | 0.549  | 0.542 | 0.564  | 0.549 | 0.581 |
| 0.598 | 0.559  | 0.547 | 0.57   | 0.546 | 0.596 |
| 0.875 | 0.773  | 0.78  | 0.68   | 0.736 | 0.802 |
| 0.918 | 0.79   | 0.716 | 0.767  | 0.787 | 0.733 |

|       |       |        |       |       |       |
|-------|-------|--------|-------|-------|-------|
| 0.832 | 0.941 | 0.815  | 0.762 | 0.778 | 0.853 |
| 0.785 | 0.894 | 0.892  | 0.804 | 0.741 | 0.892 |
| 0.624 | 0.592 | 0.599  | 0.584 | 0.602 | 0.62  |
| 0.665 | 0.63  | 0.629  | 0.592 | 0.598 | 0.636 |
| 0.685 | 0.628 | 0.614  | 0.585 | 0.604 | 0.64  |
| 0.692 | 0.616 | 0.619  | 0.592 | 0.587 | 0.635 |
| 0.071 | 0.051 | 0.092  | 0.089 | 0.088 | 0.115 |
| 0.078 | 0.107 | 0.143  | 0.131 | 0.11  | 0.176 |
| 0.127 | 0.102 | 0.076  | 0.074 | 0.058 | 0.116 |
| 0.104 | 0.138 | 0.102  | 0.08  | 0.055 | 0.145 |
| 0.295 | 0.282 | 0.283  | 0.28  | 0.272 | 0.288 |
| 0.292 | 0.285 | 0.28   | 0.284 | 0.276 | 0.29  |
| 0.291 | 0.292 | 0.281  | 0.283 | 0.277 | 0.288 |
| 0.277 | 0.292 | 0.2813 | 0.278 | 0.278 | 0.286 |
| 0.487 | 0.456 | 0.422  | 0.435 | 0.433 | 0.416 |
| 0.485 | 0.468 | 0.43   | 0.441 | 0.437 | 0.401 |
| 0.496 | 0.476 | 0.423  | 0.44  | 0.427 | 0.412 |
| 0.476 | 0.485 | 0.411  | 0.428 | 0.43  | 0.404 |
| 0.389 | 0.391 | 0.398  | 0.39  | 0.376 | 0.395 |
| 0.393 | 0.395 | 0.401  | 0.402 | 0.384 | 0.371 |
| 0.398 | 0.39  | 0.387  | 0.383 | 0.365 | 0.374 |
| 0.387 | 0.383 | 0.375  | 0.369 | 0.357 | 0.374 |
| 0.633 | 0.615 | 0.685  | 0.686 | 0.594 | 0.671 |
| 0.633 | 0.62  | 0.681  | 0.694 | 0.615 | 0.636 |
| 0.621 | 0.626 | 0.691  | 0.686 | 0.608 | 0.648 |
| 0.626 | 0.632 | 0.656  | 0.669 | 0.585 | 0.661 |
| 0.676 | 0.654 | 0.696  | 0.712 | 0.59  | 0.684 |
| 0.656 | 0.627 | 0.67   | 0.681 | 0.592 | 0.615 |
| 0.691 | 0.698 | 0.704  | 0.72  | 0.534 | 0.657 |
| 0.665 | 0.571 | 0.571  | 0.62  | 0.494 | 0.608 |
| 0.639 | 0.578 | 0.647  | 0.607 | 0.543 | 0.614 |
| 0.52  | 0.628 | 0.652  | 0.553 | 0.59  | 0.613 |
| 0.658 | 0.666 | 0.645  | 0.478 | 0.544 | 0.481 |
| 0.635 | 0.607 | 0.589  | 0.536 | 0.518 | 0.481 |
| 0.471 | 0.729 | 0.886  | 0.778 | 0.79  | 0.738 |
| 0.461 | 0.765 | 0.892  | 0.793 | 0.716 | 0.681 |

|       |       |       |       |       |       |
|-------|-------|-------|-------|-------|-------|
| 0.513 | 0.788 | 0.882 | 0.839 | 0.656 | 0.668 |
| 0.458 | 0.712 | 0.75  | 0.702 | 0.617 | 0.676 |
| 0.263 | 0.371 | 0.649 | 0.637 | 0.585 | 0.713 |
| 0.2   | 0.43  | 0.596 | 0.641 | 0.558 | 0.643 |
| 0.288 | 0.436 | 0.651 | 0.769 | 0.69  | 0.744 |
| 0.248 | 0.392 | 0.608 | 0.758 | 0.681 | 0.773 |
| 0.537 | 0.372 | 0.332 | 0.305 | 0.331 | 0.34  |
| 0.508 | 0.376 | 0.327 | 0.325 | 0.309 | 0.334 |
| 0.455 | 0.397 | 0.314 | 0.316 | 0.305 | 0.341 |
| 0.493 | 0.428 | 0.279 | 0.277 | 0.289 | 0.325 |
| 0.624 | 0.673 | 0.656 | 0.638 | 0.638 | 0.665 |
| 0.608 | 0.7   | 0.661 | 0.648 | 0.646 | 0.648 |
| 0.647 | 0.685 | 0.654 | 0.633 | 0.62  | 0.662 |
| 0.599 | 0.685 | 0.632 | 0.625 | 0.623 | 0.64  |
| 0.361 | 0.373 | 0.409 | 0.394 | 0.362 | 0.388 |
| 0.332 | 0.36  | 0.355 | 0.404 | 0.385 | 0.381 |
| 0.388 | 0.393 | 0.37  | 0.357 | 0.329 | 0.409 |
| 0.335 | 0.335 | 0.305 | 0.341 | 0.327 | 0.376 |
| 0.571 | 0.544 | 0.585 | 0.605 | 0.519 | 0.589 |
| 0.543 | 0.556 | 0.556 | 0.611 | 0.54  | 0.566 |
| 0.601 | 0.531 | 0.537 | 0.553 | 0.489 | 0.562 |
| 0.532 | 0.544 | 0.51  | 0.541 | 0.482 | 0.543 |
| 0.745 | 0.725 | 0.645 | 0.678 | 0.665 | 0.701 |
| 0.734 | 0.721 | 0.629 | 0.679 | 0.674 | 0.692 |
| 0.724 | 0.716 | 0.629 | 0.65  | 0.636 | 0.68  |
| 0.719 | 0.72  | 0.589 | 0.641 | 0.621 | 0.68  |
| 0.223 | 0.242 | 0.261 | 0.266 | 0.238 | 0.285 |
| 0.208 | 0.247 | 0.256 | 0.273 | 0.252 | 0.277 |
| 0.229 | 0.247 | 0.252 | 0.254 | 0.227 | 0.264 |
| 0.215 | 0.237 | 0.236 | 0.245 | 0.227 | 0.268 |
| 0.589 | 0.357 | 0.246 | 0.241 | 0.227 | 0.296 |
| 0.623 | 0.318 | 0.224 | 0.239 | 0.248 | 0.294 |
| 0.617 | 0.374 | 0.225 | 0.21  | 0.209 | 0.282 |
| 0.573 | 0.333 | 0.213 | 0.211 | 0.215 | 0.278 |
| 1.091 | 0.72  | 0.545 | 0.517 | 0.549 | 0.628 |
| 1.013 | 0.7   | 0.524 | 0.529 | 0.558 | 0.615 |
| 0.855 | 0.737 | 0.517 | 0.487 | 0.499 | 0.593 |
| 1.008 | 0.701 | 0.508 | 0.485 | 0.505 | 0.587 |
| 0.488 | 0.477 | 0.544 | 0.341 | 0.33  | 0.287 |

|       |        |       |       |       |       |
|-------|--------|-------|-------|-------|-------|
| 0.494 | 0.4457 | 0.449 | 0.333 | 0.318 | 0.275 |
| 0.414 | 0.31   | 0.401 | 0.315 | 0.333 | 0.305 |
| 0.326 | 0.55   | 0.393 | 0.322 | 0.362 | 0.29  |
| 0.445 | 0.4213 | 0.431 | 0.399 | 0.402 | 0.437 |
| 0.459 | 0.43   | 0.433 | 0.395 | 0.397 | 0.423 |
| 0.454 | 0.418  | 0.417 | 0.383 | 0.393 | 0.438 |
| 0.414 | 0.416  | 0.393 | 0.381 | 0.391 | 0.433 |
| 0.569 | 0.561  | 0.568 | 0.579 | 0.567 | 0.557 |
| 0.557 | 0.57   | 0.574 | 0.591 | 0.555 | 0.545 |
| 0.562 | 0.555  | 0.565 | 0.57  | 0.547 | 0.534 |
| 0.56  | 0.57   | 0.556 | 0.562 | 0.546 | 0.539 |
| 0.902 | 0.812  | 0.672 | 0.66  | 0.596 | 0.628 |
| 0.87  | 0.838  | 0.72  | 0.669 | 0.663 | 0.643 |
| 0.89  | 0.843  | 0.665 | 0.683 | 0.617 | 0.672 |
| 0.828 | 0.875  | 0.676 | 0.664 | 0.625 | 0.697 |
| 0.606 | 0.615  | 0.643 | 0.613 | 0.563 | 0.618 |
| 0.641 | 0.652  | 0.599 | 0.578 | 0.609 | 0.574 |
| 0.66  | 0.655  | 0.631 | 0.595 | 0.579 | 0.561 |
| 0.652 | 0.639  | 0.63  | 0.588 | 0.581 | 0.563 |
| 0.076 | 0.067  | 0.06  | 0.047 | 0.043 | 0.082 |
| 0.078 | 0.061  | 0.059 | 0.046 | 0.048 | 0.08  |
| 0.075 | 0.078  | 0.056 | 0.046 | 0.04  | 0.087 |
| 0.069 | 0.074  | 0.047 | 0.046 | 0.039 | 0.102 |
| 0.312 | 0.289  | 0.304 | 0.305 | 0.287 | 0.305 |
| 0.32  | 0.2963 | 0.296 | 0.301 | 0.285 | 0.303 |
| 0.299 | 0.304  | 0.299 | 0.313 | 0.294 | 0.307 |
| 0.303 | 0.296  | 0.301 | 0.303 | 0.281 | 0.301 |
| 0.541 | 0.448  | 0.451 | 0.492 | 0.496 | 0.484 |
| 0.517 | 0.448  | 0.436 | 0.478 | 0.484 | 0.479 |
| 0.57  | 0.484  | 0.447 | 0.483 | 0.488 | 0.468 |
| 0.552 | 0.464  | 0.444 | 0.457 | 0.448 | 0.446 |
| 0.39  | 0.294  | 0.326 | 0.341 | 0.362 | 0.377 |
| 0.424 | 0.297  | 0.338 | 0.337 | 0.359 | 0.363 |
| 0.285 | 0.412  | 0.412 | 0.42  | 0.416 | 0.414 |
| 0.407 | 0.396  | 0.396 | 0.378 | 0.4   | 0.415 |
| 0.629 | 0.576  | 0.597 | 0.626 | 0.594 | 0.616 |

|       |        |       |        |       |       |
|-------|--------|-------|--------|-------|-------|
| 0.714 | 0.565  | 0.588 | 0.6    | 0.589 | 0.605 |
| 0.596 | 0.691  | 0.676 | 0.703  | 0.678 | 0.684 |
| 0.663 | 0.645  | 0.671 | 0.654  | 0.637 | 0.663 |
| 0.692 | 0.623  | 0.644 | 0.633  | 0.545 | 0.639 |
| 0.732 | 0.584  | 0.623 | 0.61   | 0.494 | 0.578 |
| 0.69  | 0.797  | 0.752 | 0.6187 | 0.602 | 0.689 |
| 0.705 | 0.644  | 0.675 | 0.613  | 0.573 | 0.67  |
| 0.609 | 0.531  | 0.556 | 0.575  | 0.508 | 0.571 |
| 0.746 | 0.514  | 0.531 | 0.563  | 0.512 | 0.56  |
| 0.567 | 0.613  | 0.684 | 0.601  | 0.604 | 0.679 |
| 0.699 | 0.69   | 0.658 | 0.609  | 0.614 | 0.676 |
| 0.502 | 0.637  | 0.807 | 0.753  | 0.662 | 0.679 |
| 0.567 | 0.667  | 0.803 | 0.718  | 0.601 | 0.714 |
| 0.51  | 0.818  | 0.922 | 0.888  | 0.743 | 0.809 |
| 0.541 | 0.765  | 0.927 | 0.815  | 0.713 | 0.807 |
| 0.335 | 0.442  | 0.646 | 0.724  | 0.771 | 0.807 |
| 0.354 | 0.465  | 0.641 | 0.712  | 0.666 | 0.7   |
| 0.253 | 0.552  | 0.755 | 0.824  | 0.791 | 0.812 |
| 0.393 | 0.502  | 0.632 | 0.694  | 0.62  | 0.767 |
| 0.49  | 0.346  | 0.343 | 0.322  | 0.314 | 0.332 |
| 0.483 | 0.303  | 0.274 | 0.288  | 0.295 | 0.351 |
| 0.614 | 0.405  | 0.312 | 0.326  | 0.309 | 0.325 |
| 0.425 | 0.335  | 0.285 | 0.294  | 0.299 | 0.338 |
| 0.714 | 0.6953 | 0.686 | 0.718  | 0.664 | 0.709 |
| 0.708 | 0.67   | 0.691 | 0.727  | 0.676 | 0.727 |
| 0.748 | 0.736  | 0.664 | 0.701  | 0.638 | 0.686 |
| 0.746 | 0.68   | 0.663 | 0.688  | 0.613 | 0.665 |
| 0.342 | 0.324  | 0.357 | 0.382  | 0.325 | 0.371 |
| 0.301 | 0.28   | 0.328 | 0.363  | 0.32  | 0.353 |
| 0.316 | 0.305  | 0.403 | 0.391  | 0.368 | 0.401 |
| 0.302 | 0.311  | 0.326 | 0.288  | 0.317 | 0.382 |
| 0.646 | 0.74   | 0.73  | 0.707  | 0.585 | 0.649 |
| 0.63  | 0.734  | 0.787 | 0.62   | 0.657 | 0.584 |
| 0.901 | 0.576  | 0.549 | 0.586  | 0.601 | 0.515 |
| 0.541 | 0.593  | 0.606 | 0.582  | 0.543 | 0.61  |
| 0.692 | 0.601  | 0.585 | 0.616  | 0.594 | 0.639 |
| 0.788 | 0.567  | 0.563 | 0.591  | 0.582 | 0.617 |
| 0.663 | 0.744  | 0.663 | 0.706  | 0.68  | 0.729 |
| 0.723 | 0.636  | 0.631 | 0.647  | 0.645 | 0.721 |

|       |       |        |        |       |       |
|-------|-------|--------|--------|-------|-------|
| 0.222 | 0.217 | 0.23   | 0.234  | 0.223 | 0.235 |
| 0.244 | 0.205 | 0.221  | 0.221  | 0.206 | 0.219 |
| 0.207 | 0.253 | 0.246  | 0.225  | 0.236 | 0.251 |
| 0.23  | 0.226 | 0.23   | 0.22   | 0.219 | 0.252 |
| 0.488 | 0.222 | 0.202  | 0.225  | 0.221 | 0.266 |
| 0.538 | 0.211 | 0.187  | 0.211  | 0.224 | 0.255 |
| 0.432 | 0.305 | 0.231  | 0.243  | 0.248 | 0.271 |
| 0.493 | 0.264 | 0.214  | 0.221  | 0.222 | 0.273 |
| 0.862 | 0.556 | 0.496  | 0.485  | 0.5   | 0.507 |
| 1.054 | 0.522 | 0.463  | 0.447  | 0.471 | 0.514 |
| 0.709 | 0.661 | 0.513  | 0.53   | 0.547 | 0.593 |
| 0.922 | 0.583 | 0.489  | 0.463  | 0.496 | 0.582 |
| 0.57  | 0.218 | 0.36   | 0.297  | 0.333 | 0.294 |
| 0.638 | 0.554 | 0.336  | 0.298  | 0.31  | 0.312 |
| 0.213 | 0.346 | 0.457  | 0.326  | 0.383 | 0.365 |
| 0.356 | 0.577 | 0.443  | 0.356  | 0.363 | 0.358 |
| 0.483 | 0.464 | 0.497  | 0.483  | 0.465 | 0.508 |
| 0.461 | 0.463 | 0.489  | 0.475  | 0.458 | 0.504 |
| 0.483 | 0.452 | 0.4797 | 0.457  | 0.431 | 0.479 |
| 0.464 | 0.442 | 0.453  | 0.432  | 0.411 | 0.474 |
| 0.585 | 0.532 | 0.587  | 0.567  | 0.595 | 0.575 |
| 0.633 | 0.541 | 0.57   | 0.556  | 0.581 | 0.573 |
| 0.601 | 0.564 | 0.577  | 0.5587 | 0.612 | 0.596 |
| 0.606 | 0.557 | 0.576  | 0.553  | 0.603 | 0.595 |
| 0.913 | 0.761 | 0.631  | 0.587  | 0.603 | 0.612 |
| 0.859 | 0.727 | 0.617  | 0.582  | 0.577 | 0.664 |
| 0.85  | 0.847 | 0.647  | 0.666  | 0.639 | 0.659 |
| 0.784 | 0.768 | 0.61   | 0.588  | 0.556 | 0.652 |
| 0.612 | 0.587 | 0.59   | 0.566  | 0.604 | 0.603 |
| 0.669 | 0.605 | 0.598  | 0.566  | 0.59  | 0.607 |
| 0.603 | 0.698 | 0.677  | 0.65   | 0.648 | 0.662 |
| 0.716 | 0.68  | 0.625  | 0.597  | 0.617 | 0.668 |
| 0.053 | 0.041 | 0.05   | 0.046  | 0.035 | 0.06  |
| 0.058 | 0.042 | 0.037  | 0.043  | 0.04  | 0.05  |
| 0.049 | 0.062 | 0.051  | 0.056  | 0.044 | 0.071 |
| 0.05  | 0.045 | 0.042  | 0.034  | 0.032 | 0.063 |

|       |       |        |       |        |        |
|-------|-------|--------|-------|--------|--------|
| 0.262 | 0.255 | 0.255  | 0.253 | 0.257  | 0.267  |
| 0.257 | 0.266 | 0.256  | 0.254 | 0.25   | 0.271  |
| 0.26  | 0.273 | 0.264  | 0.273 | 0.273  | 0.281  |
| 0.263 | 0.269 | 0.258  | 0.266 | 0.263  | 0.282  |
| 0.386 | 0.377 | 0.408  | 0.389 | 0.37   | 0.385  |
| 0.408 | 0.396 | 0.398  | 0.397 | 0.365  | 0.393  |
| 0.412 | 0.384 | 0.43   | 0.418 | 0.379  | 0.432  |
| 0.416 | 0.434 | 0.418  | 0.418 | 0.368  | 0.425  |
| 0.369 | 0.369 | 0.382  | 0.39  | 0.363  | 0.359  |
| 0.373 | 0.392 | 0.355  | 0.385 | 0.345  | 0.37   |
| 0.374 | 0.384 | 0.381  | 0.387 | 0.378  | 0.362  |
| 0.383 | 0.391 | 0.364  | 0.407 | 0.387  | 0.382  |
| 0.652 | 0.667 | 0.683  | 0.694 | 0.691  | 0.736  |
| 0.627 | 0.71  | 0.688  | 0.682 | 0.7157 | 0.736  |
| 0.659 | 0.741 | 0.712  | 0.696 | 0.724  | 0.744  |
| 0.675 | 0.704 | 0.697  | 0.721 | 0.732  | 0.7387 |
| 0.761 | 0.668 | 0.756  | 0.721 | 0.626  | 0.644  |
| 0.725 | 0.789 | 0.735  | 0.728 | 0.528  | 0.596  |
| 0.834 | 0.753 | 0.753  | 0.72  | 0.624  | 0.678  |
| 0.775 | 0.73  | 0.665  | 0.696 | 0.602  | 0.663  |
| 0.449 | 0.522 | 0.474  | 0.489 | 0.495  | 0.431  |
| 0.458 | 0.503 | 0.453  | 0.49  | 0.508  | 0.436  |
| 0.505 | 0.527 | 0.461  | 0.488 | 0.492  | 0.471  |
| 0.517 | 0.509 | 0.437  | 0.482 | 0.485  | 0.474  |
| 0.504 | 0.701 | 0.803  | 0.788 | 0.654  | 0.645  |
| 0.493 | 0.782 | 0.812  | 0.786 | 0.582  | 0.655  |
| 0.586 | 0.737 | 0.784  | 0.802 | 0.681  | 0.694  |
| 0.566 | 0.787 | 0.766  | 0.776 | 0.639  | 0.683  |
| 0.228 | 0.404 | 0.674  | 0.721 | 0.67   | 0.67   |
| 0.221 | 0.462 | 0.681  | 0.701 | 0.623  | 0.664  |
| 0.259 | 0.445 | 0.646  | 0.712 | 0.707  | 0.692  |
| 0.247 | 0.449 | 0.654  | 0.742 | 0.724  | 0.718  |
| 0.889 | 0.578 | 0.564  | 0.549 | 0.521  | 0.576  |
| 0.909 | 0.628 | 0.538  | 0.552 | 0.487  | 0.57   |
| 0.914 | 0.633 | 0.57   | 0.569 | 0.535  | 0.622  |
| 0.922 | 0.63  | 0.551  | 0.558 | 0.535  | 0.608  |
| 0.288 | 0.262 | 0.292  | 0.287 | 0.265  | 0.277  |
| 0.317 | 0.298 | 0.287  | 0.288 | 0.279  | 0.292  |
| 0.277 | 0.291 | 0.2887 | 0.28  | 0.306  | 0.3    |
| 0.305 | 0.303 | 0.287  | 0.284 | 0.319  | 0.309  |

|       |       |       |       |        |       |
|-------|-------|-------|-------|--------|-------|
| 0.309 | 0.274 | 0.353 | 0.355 | 0.316  | 0.359 |
| 0.278 | 0.353 | 0.314 | 0.392 | 0.3327 | 0.338 |
| 0.345 | 0.328 | 0.349 | 0.364 | 0.36   | 0.405 |
| 0.299 | 0.329 | 0.303 | 0.357 | 0.322  | 0.366 |
| 0.425 | 0.446 | 0.444 | 0.46  | 0.44   | 0.448 |
| 0.451 | 0.445 | 0.439 | 0.476 | 0.4533 | 0.463 |
| 0.463 | 0.446 | 0.469 | 0.468 | 0.457  | 0.48  |
| 0.43  | 0.447 | 0.437 | 0.488 | 0.463  | 0.481 |
| 0.669 | 0.615 | 0.631 | 0.634 | 0.624  | 0.7   |
| 0.696 | 0.739 | 0.624 | 0.658 | 0.598  | 0.723 |
| 0.758 | 0.714 | 0.651 | 0.633 | 0.669  | 0.73  |
| 0.696 | 0.696 | 0.652 | 0.663 | 0.655  | 0.735 |
| 0.202 | 0.225 | 0.23  | 0.228 | 0.226  | 0.231 |
| 0.205 | 0.228 | 0.232 | 0.234 | 0.215  | 0.237 |
| 0.23  | 0.223 | 0.23  | 0.23  | 0.245  | 0.235 |
| 0.222 | 0.224 | 0.235 | 0.243 | 0.239  | 0.248 |
| 0.572 | 0.278 | 0.218 | 0.209 | 0.218  | 0.241 |
| 0.566 | 0.332 | 0.22  | 0.213 | 0.2    | 0.256 |
| 0.647 | 0.332 | 0.221 | 0.208 | 0.233  | 0.254 |
| 0.602 | 0.328 | 0.224 | 0.22  | 0.23   | 0.256 |
| 1.002 | 0.55  | 0.491 | 0.497 | 0.515  | 0.517 |
| 1.017 | 0.637 | 0.487 | 0.521 | 0.477  | 0.529 |
| 0.924 | 0.632 | 0.494 | 0.481 | 0.53   | 0.524 |
| 0.882 | 0.625 | 0.464 | 0.505 | 0.54   | 0.544 |
| 0.556 | 0.39  | 0.327 | 0.261 | 0.294  | 0.244 |
| 0.49  | 0.569 | 0.366 | 0.237 | 0.3    | 0.225 |
| 0.296 | 0.294 | 0.371 | 0.266 | 0.26   | 0.277 |
| 0.263 | 0.582 | 0.381 | 0.252 | 0.303  | 0.256 |
| 0.384 | 0.357 | 0.395 | 0.393 | 0.38   | 0.365 |
| 0.411 | 0.381 | 0.401 | 0.394 | 0.379  | 0.377 |
| 0.393 | 0.372 | 0.408 | 0.41  | 0.399  | 0.387 |
| 0.403 | 0.385 | 0.412 | 0.411 | 0.393  | 0.398 |
| 0.512 | 0.53  | 0.517 | 0.515 | 0.505  | 0.503 |
| 0.529 | 0.535 | 0.502 | 0.508 | 0.508  | 0.513 |
| 0.524 | 0.543 | 0.521 | 0.53  | 0.523  | 0.504 |
| 0.542 | 0.539 | 0.518 | 0.516 | 0.515  | 0.526 |
| 0.722 | 0.596 | 0.57  | 0.526 | 0.539  | 0.563 |
| 0.775 | 0.733 | 0.588 | 0.601 | 0.489  | 0.599 |
| 0.754 | 0.721 | 0.632 | 0.608 | 0.6    | 0.65  |

|       |       |       |       |       |       |
|-------|-------|-------|-------|-------|-------|
| 0.731 | 0.724 | 0.611 | 0.635 | 0.577 | 0.653 |
| 0.7   | 0.592 | 0.59  | 0.58  | 0.56  | 0.549 |
| 0.707 | 0.624 | 0.569 | 0.573 | 0.529 | 0.55  |
| 0.731 | 0.63  | 0.59  | 0.586 | 0.571 | 0.572 |
| 0.737 | 0.63  | 0.586 | 0.599 | 0.586 | 0.567 |
| 0.102 | 0.078 | 0.099 | 0.094 | 0.071 | 0.116 |
| 0.097 | 0.141 | 0.086 | 0.092 | 0.055 | 0.131 |
| 0.131 | 0.118 | 0.082 | 0.076 | 0.094 | 0.133 |
| 0.12  | 0.124 | 0.09  | 0.091 | 0.088 | 0.135 |
| 0.315 | 0.298 | 0.296 | 0.303 | 0.304 | 0.333 |
| 0.277 | 0.31  | 0.302 | 0.307 | 0.306 | 0.327 |
| 0.303 | 0.282 | 0.27  | 0.284 | 0.265 | 0.29  |
| 0.294 | 0.282 | 0.272 | 0.298 | 0.269 | 0.3   |
| 0.499 | 0.474 | 0.485 | 0.445 | 0.445 | 0.467 |
| 0.479 | 0.496 | 0.502 | 0.459 | 0.45  | 0.451 |
| 0.536 | 0.445 | 0.452 | 0.434 | 0.412 | 0.424 |
| 0.498 | 0.46  | 0.465 | 0.418 | 0.415 | 0.433 |
| 0.359 | 0.356 | 0.401 | 0.344 | 0.385 | 0.371 |
| 0.377 | 0.365 | 0.393 | 0.344 | 0.38  | 0.376 |
| 0.361 | 0.418 | 0.43  | 0.38  | 0.419 | 0.4   |
| 0.398 | 0.405 | 0.437 | 0.392 | 0.412 | 0.409 |
| 0.664 | 0.589 | 0.643 | 0.652 | 0.591 | 0.653 |
| 0.684 | 0.63  | 0.643 | 0.666 | 0.612 | 0.655 |
| 0.644 | 0.691 | 0.69  | 0.725 | 0.659 | 0.728 |
| 0.714 | 0.668 | 0.7   | 0.721 | 0.643 | 0.716 |
| 0.795 | 0.729 | 0.797 | 0.805 | 0.625 | 0.71  |
| 0.812 | 0.738 | 0.73  | 0.778 | 0.628 | 0.677 |
| 0.842 | 0.786 | 0.818 | 0.812 | 0.646 | 0.749 |
| 0.916 | 0.828 | 0.849 | 0.858 | 0.659 | 0.77  |
| 0.496 | 0.59  | 0.536 | 0.57  | 0.496 | 0.518 |
| 0.554 | 0.535 | 0.539 | 0.557 | 0.577 | 0.485 |
| 0.552 | 0.616 | 0.633 | 0.67  | 0.556 | 0.564 |
| 0.665 | 0.602 | 0.6   | 0.643 | 0.539 | 0.588 |
| 0.515 | 0.674 | 0.796 | 0.837 | 0.721 | 0.671 |
| 0.542 | 0.75  | 0.796 | 0.799 | 0.678 | 0.606 |
| 0.563 | 0.802 | 0.864 | 0.864 | 0.76  | 0.691 |

|       |       |       |       |       |       |
|-------|-------|-------|-------|-------|-------|
| 0.618 | 0.818 | 0.901 | 0.884 | 0.833 | 0.735 |
| 0.207 | 0.437 | 0.639 | 0.74  | 0.732 | 0.771 |
| 0.229 | 0.538 | 0.709 | 0.8   | 0.76  | 0.808 |
| 0.245 | 0.571 | 0.745 | 0.854 | 0.865 | 0.849 |
| 0.26  | 0.549 | 0.731 | 0.828 | 0.841 | 0.893 |
| 1.077 | 0.793 | 0.673 | 0.631 | 0.648 | 0.697 |
| 0.97  | 0.819 | 0.668 | 0.62  | 0.654 | 0.704 |
| 1.08  | 0.714 | 0.609 | 0.562 | 0.589 | 0.663 |
| 0.975 | 0.748 | 0.643 | 0.585 | 0.588 | 0.645 |
| 0.348 | 0.323 | 0.342 | 0.342 | 0.328 | 0.334 |
| 0.299 | 0.355 | 0.328 | 0.337 | 0.344 | 0.34  |
| 0.353 | 0.297 | 0.3   | 0.306 | 0.287 | 0.302 |
| 0.304 | 0.319 | 0.32  | 0.286 | 0.3   | 0.305 |
| 0.337 | 0.303 | 0.362 | 0.361 | 0.344 | 0.386 |
| 0.302 | 0.35  | 0.364 | 0.375 | 0.336 | 0.365 |
| 0.338 | 0.363 | 0.367 | 0.376 | 0.314 | 0.377 |
| 0.343 | 0.371 | 0.363 | 0.411 | 0.339 | 0.412 |
| 0.623 | 0.539 | 0.56  | 0.587 | 0.588 | 0.595 |
| 0.566 | 0.584 | 0.556 | 0.605 | 0.587 | 0.604 |
| 0.65  | 0.501 | 0.505 | 0.53  | 0.51  | 0.533 |
| 0.555 | 0.523 | 0.522 | 0.546 | 0.508 | 0.53  |
| 0.641 | 0.658 | 0.668 | 0.663 | 0.669 | 0.668 |
| 0.667 | 0.7   | 0.66  | 0.673 | 0.661 | 0.671 |
| 0.661 | 0.775 | 0.741 | 0.749 | 0.684 | 0.733 |
| 0.751 | 0.769 | 0.746 | 0.75  | 0.677 | 0.715 |
| 0.214 | 0.201 | 0.239 | 0.248 | 0.251 | 0.261 |
| 0.201 | 0.232 | 0.242 | 0.258 | 0.254 | 0.261 |
| 0.212 | 0.245 | 0.247 | 0.278 | 0.247 | 0.282 |
| 0.249 | 0.246 | 0.261 | 0.276 | 0.257 | 0.28  |
| 0.53  | 0.254 | 0.207 | 0.205 | 0.21  | 0.249 |
| 0.676 | 0.292 | 0.202 | 0.211 | 0.209 | 0.251 |
| 0.53  | 0.328 | 0.224 | 0.224 | 0.218 | 0.266 |
| 0.633 | 0.316 | 0.222 | 0.224 | 0.219 | 0.284 |
| 1.006 | 0.617 | 0.516 | 0.539 | 0.568 | 0.601 |
| 1.039 | 0.678 | 0.505 | 0.553 | 0.543 | 0.578 |
| 0.829 | 0.784 | 0.56  | 0.583 | 0.582 | 0.627 |
| 0.964 | 0.729 | 0.545 | 0.589 | 0.592 | 0.657 |
| 0.545 | 0.373 | 0.334 | 0.296 | 0.295 | 0.26  |
| 0.51  | 0.576 | 0.378 | 0.279 | 0.313 | 0.281 |

|        |       |       |        |       |        |
|--------|-------|-------|--------|-------|--------|
| 0.327  | 0.312 | 0.424 | 0.28   | 0.326 | 0.273  |
| 0.279  | 0.629 | 0.426 | 0.284  | 0.342 | 0.257  |
| 0.46   | 0.456 | 0.433 | 0.434  | 0.422 | 0.465  |
| 0.459  | 0.482 | 0.444 | 0.4257 | 0.42  | 0.439  |
| 0.4527 | 0.448 | 0.414 | 0.43   | 0.392 | 0.427  |
| 0.439  | 0.463 | 0.424 | 0.413  | 0.392 | 0.431  |
| 0.589  | 0.528 | 0.532 | 0.569  | 0.557 | 0.569  |
| 0.559  | 0.554 | 0.533 | 0.569  | 0.572 | 0.575  |
| 0.596  | 0.505 | 0.505 | 0.534  | 0.532 | 0.554  |
| 0.57   | 0.516 | 0.521 | 0.535  | 0.542 | 0.539  |
| 0.926  | 0.813 | 0.698 | 0.685  | 0.716 | 0.696  |
| 0.817  | 0.908 | 0.732 | 0.758  | 0.747 | 0.745  |
| 0.929  | 0.79  | 0.646 | 0.663  | 0.632 | 0.688  |
| 0.834  | 0.832 | 0.685 | 0.683  | 0.646 | 0.716  |
| 0.664  | 0.586 | 0.589 | 0.602  | 0.58  | 0.581  |
| 0.678  | 0.633 | 0.578 | 0.597  | 0.591 | 0.586  |
| 0.69   | 0.679 | 0.62  | 0.622  | 0.642 | 0.629  |
| 0.74   | 0.67  | 0.631 | 0.633  | 0.611 | 0.624  |
| 0.074  | 0.048 | 0.061 | 0.061  | 0.055 | 0.065  |
| 0.072  | 0.076 | 0.054 | 0.063  | 0.064 | 0.076  |
| 0.074  | 0.092 | 0.072 | 0.077  | 0.07  | 0.102  |
| 0.096  | 0.096 | 0.078 | 0.087  | 0.067 | 0.081  |
| 0.266  | 0.273 | 0.277 | 0.279  | 0.269 | 0.271  |
| 0.262  | 0.285 | 0.281 | 0.277  | 0.271 | 0.273  |
| 0.268  | 0.28  | 0.276 | 0.276  | 0.269 | 0.2707 |
| 0.259  | 0.273 | 0.29  | 0.279  | 0.268 | 0.268  |
| 0.457  | 0.436 | 0.425 | 0.4    | 0.392 | 0.43   |
| 0.466  | 0.496 | 0.499 | 0.419  | 0.393 | 0.432  |
| 0.508  | 0.447 | 0.436 | 0.408  | 0.397 | 0.434  |
| 0.467  | 0.442 | 0.464 | 0.408  | 0.389 | 0.434  |
| 0.412  | 0.379 | 0.403 | 0.391  | 0.379 | 0.414  |
| 0.381  | 0.387 | 0.426 | 0.412  | 0.38  | 0.406  |
| 0.411  | 0.378 | 0.403 | 0.393  | 0.374 | 0.381  |
| 0.399  | 0.377 | 0.407 | 0.397  | 0.364 | 0.389  |
| 0.665  | 0.704 | 0.64  | 0.725  | 0.658 | 0.736  |
| 0.662  | 0.731 | 0.727 | 0.727  | 0.657 | 0.739  |

|       |       |        |        |       |       |
|-------|-------|--------|--------|-------|-------|
| 0.743 | 0.707 | 0.653  | 0.687  | 0.618 | 0.676 |
| 0.68  | 0.696 | 0.684  | 0.678  | 0.612 | 0.669 |
| 0.784 | 0.7   | 0.782  | 0.733  | 0.705 | 0.752 |
| 0.725 | 0.694 | 0.847  | 0.743  | 0.647 | 0.639 |
| 0.837 | 0.715 | 0.782  | 0.683  | 0.636 | 0.673 |
| 0.742 | 0.651 | 0.829  | 0.79   | 0.636 | 0.678 |
| 0.626 | 0.522 | 0.563  | 0.534  | 0.54  | 0.567 |
| 0.573 | 0.573 | 0.5733 | 0.589  | 0.472 | 0.484 |
| 0.646 | 0.539 | 0.55   | 0.516  | 0.463 | 0.474 |
| 0.573 | 0.514 | 0.607  | 0.543  | 0.461 | 0.476 |
| 0.491 | 0.771 | 0.966  | 0.969  | 0.976 | 0.953 |
| 0.479 | 0.792 | 1.068  | 0.938  | 0.943 | 0.883 |
| 0.566 | 0.759 | 0.967  | 0.91   | 0.847 | 0.827 |
| 0.497 | 0.714 | 0.973  | 0.935  | 0.89  | 0.811 |
| 0.216 | 0.511 | 0.739  | 0.877  | 0.917 | 0.997 |
| 0.204 | 0.503 | 0.868  | 0.858  | 0.93  | 0.98  |
| 0.259 | 0.486 | 0.703  | 0.822  | 0.831 | 0.85  |
| 0.234 | 0.451 | 0.752  | 0.822  | 0.848 | 0.94  |
| 0.986 | 0.761 | 0.593  | 0.616  | 0.654 | 0.727 |
| 0.943 | 0.77  | 0.61   | 0.646  | 0.642 | 0.665 |
| 0.936 | 0.78  | 0.622  | 0.627  | 0.645 | 0.714 |
| 0.921 | 0.754 | 0.612  | 0.638  | 0.645 | 0.679 |
| 0.608 | 0.6   | 0.629  | 0.63   | 0.618 | 0.581 |
| 0.61  | 0.608 | 0.63   | 0.636  | 0.602 | 0.557 |
| 0.617 | 0.605 | 0.637  | 0.619  | 0.6   | 0.569 |
| 0.607 | 0.586 | 0.627  | 0.642  | 0.606 | 0.569 |
| 0.604 | 0.585 | 0.574  | 0.675  | 0.605 | 0.816 |
| 0.54  | 0.683 | 0.693  | 0.697  | 0.594 | 0.728 |
| 0.647 | 0.675 | 0.613  | 0.678  | 0.596 | 0.761 |
| 0.595 | 0.637 | 0.68   | 0.708  | 0.586 | 0.764 |
| 0.553 | 0.51  | 0.489  | 0.49   | 0.452 | 0.539 |
| 0.564 | 0.566 | 0.51   | 0.526  | 0.481 | 0.539 |
| 0.458 | 0.534 | 0.495  | 0.498  | 0.491 | 0.447 |
| 0.528 | 0.55  | 0.48   | 0.5047 | 0.485 | 0.536 |
| 0.889 | 0.795 | 0.77   | 0.796  | 0.776 | 0.938 |
| 0.85  | 0.867 | 0.953  | 0.836  | 0.825 | 0.91  |
| 0.918 | 0.838 | 0.796  | 0.802  | 0.797 | 0.941 |
| 0.864 | 0.859 | 0.944  | 0.821  | 0.784 | 0.935 |
| 0.204 | 0.219 | 0.235  | 0.233  | 0.223 | 0.262 |

|        |       |        |        |       |       |
|--------|-------|--------|--------|-------|-------|
| 0.19   | 0.242 | 0.2367 | 0.244  | 0.235 | 0.253 |
| 0.221  | 0.215 | 0.22   | 0.228  | 0.218 | 0.232 |
| 0.204  | 0.223 | 0.255  | 0.231  | 0.209 | 0.235 |
| 0.529  | 0.301 | 0.221  | 0.204  | 0.219 | 0.286 |
| 0.493  | 0.276 | 0.264  | 0.228  | 0.231 | 0.276 |
| 0.56   | 0.334 | 0.219  | 0.197  | 0.218 | 0.258 |
| 0.461  | 0.308 | 0.238  | 0.208  | 0.211 | 0.253 |
| 0.835  | 0.616 | 0.478  | 0.511  | 0.506 | 0.601 |
| 0.79   | 0.675 | 0.568  | 0.57   | 0.518 | 0.575 |
| 0.902  | 0.64  | 0.484  | 0.488  | 0.48  | 0.537 |
| 0.801  | 0.611 | 0.498  | 0.529  | 0.491 | 0.566 |
| 0.447  | 0.341 | 0.417  | 0.301  | 0.314 | 0.246 |
| 0.501  | 0.608 | 0.351  | 0.368  | 0.311 | 0.266 |
| 0.296  | 0.351 | 0.482  | 0.316  | 0.339 | 0.282 |
| 0.382  | 0.583 | 0.404  | 0.347  | 0.343 | 0.263 |
| 0.436  | 0.418 | 0.443  | 0.418  | 0.385 | 0.438 |
| 0.422  | 0.441 | 0.477  | 0.44   | 0.42  | 0.436 |
| 0.432  | 0.428 | 0.432  | 0.407  | 0.397 | 0.42  |
| 0.419  | 0.426 | 0.453  | 0.415  | 0.411 | 0.428 |
| 0.538  | 0.54  | 0.533  | 0.5333 | 0.536 | 0.516 |
| 0.541  | 0.545 | 0.533  | 0.53   | 0.539 | 0.507 |
| 0.545  | 0.552 | 0.541  | 0.539  | 0.548 | 0.516 |
| 0.556  | 0.557 | 0.55   | 0.531  | 0.546 | 0.515 |
| 0.879  | 0.773 | 0.672  | 0.636  | 0.643 | 0.749 |
| 0.794  | 0.919 | 0.706  | 0.728  | 0.687 | 0.761 |
| 0.895  | 0.869 | 0.712  | 0.661  | 0.655 | 0.713 |
| 0.811  | 0.689 | 0.809  | 0.686  | 0.664 | 0.702 |
| 0.677  | 0.599 | 0.631  | 0.593  | 0.575 | 0.613 |
| 0.654  | 0.578 | 0.625  | 0.622  | 0.553 | 0.608 |
| 0.667  | 0.591 | 0.612  | 0.574  | 0.54  | 0.598 |
| 0.637  | 0.565 | 0.602  | 0.602  | 0.551 | 0.589 |
| 0.062  | 0.047 | 0.045  | 0.046  | 0.038 | 0.076 |
| 0.052  | 0.084 | 0.0507 | 0.064  | 0.047 | 0.078 |
| 0.0567 | 0.056 | 0.045  | 0.055  | 0.051 | 0.061 |
| 0.056  | 0.066 | 0.062  | 0.052  | 0.054 | 0.079 |
| 0.285  | 0.298 | 0.276  | 0.288  | 0.267 | 0.287 |

|       |       |       |       |        |       |
|-------|-------|-------|-------|--------|-------|
| 0.282 | 0.305 | 0.295 | 0.292 | 0.27   | 0.295 |
| 0.3   | 0.306 | 0.285 | 0.284 | 0.268  | 0.277 |
| 0.293 | 0.305 | 0.289 | 0.286 | 0.271  | 0.3   |
| 0.482 | 0.428 | 0.437 | 0.43  | 0.394  | 0.414 |
| 0.491 | 0.479 | 0.456 | 0.472 | 0.402  | 0.465 |
| 0.527 | 0.443 | 0.433 | 0.429 | 0.402  | 0.419 |
| 0.522 | 0.459 | 0.447 | 0.468 | 0.414  | 0.439 |
| 0.376 | 0.357 | 0.386 | 0.411 | 0.35   | 0.372 |
| 0.38  | 0.385 | 0.397 | 0.367 | 0.36   | 0.379 |
| 0.392 | 0.358 | 0.378 | 0.343 | 0.341  | 0.354 |
| 0.382 | 0.352 | 0.376 | 0.352 | 0.345  | 0.364 |
| 0.638 | 0.624 | 0.657 | 0.669 | 0.65   | 0.715 |
| 0.601 | 0.672 | 0.702 | 0.697 | 0.659  | 0.72  |
| 0.687 | 0.622 | 0.661 | 0.682 | 0.641  | 0.684 |
| 0.676 | 0.649 | 0.656 | 0.685 | 0.652  | 0.705 |
| 0.707 | 0.595 | 0.733 | 0.832 | 0.645  | 0.696 |
| 0.643 | 0.678 | 0.753 | 0.822 | 0.569  | 0.629 |
| 0.795 | 0.655 | 0.663 | 0.678 | 0.554  | 0.688 |
| 0.709 | 0.699 | 0.728 | 0.707 | 0.585  | 0.688 |
| 0.652 | 0.66  | 0.581 | 0.634 | 0.52   | 0.584 |
| 0.618 | 0.606 | 0.615 | 0.652 | 0.488  | 0.598 |
| 0.715 | 0.587 | 0.524 | 0.537 | 0.591  | 0.566 |
| 0.643 | 0.614 | 0.585 | 0.547 | 0.495  | 0.581 |
| 0.612 | 0.627 | 0.906 | 0.962 | 0.799  | 0.823 |
| 0.541 | 0.714 | 0.914 | 1.044 | 0.7397 | 0.751 |
| 0.699 | 0.701 | 0.785 | 0.788 | 0.663  | 0.818 |
| 0.577 | 0.79  | 0.944 | 0.827 | 0.757  | 0.777 |
| 0.296 | 0.409 | 0.73  | 0.891 | 0.765  | 0.843 |
| 0.262 | 0.502 | 0.785 | 0.908 | 0.705  | 0.836 |
| 0.336 | 0.455 | 0.644 | 0.791 | 0.675  | 0.819 |
| 0.302 | 0.515 | 0.751 | 0.845 | 0.698  | 0.77  |
| 1.084 | 0.758 | 0.658 | 0.631 | 0.62   | 0.676 |
| 1.094 | 0.784 | 0.684 | 0.657 | 0.577  | 0.64  |
| 1.11  | 0.802 | 0.646 | 0.627 | 0.621  | 0.684 |
| 1.067 | 0.806 | 0.696 | 0.617 | 0.621  | 0.688 |
| 0.663 | 0.632 | 0.63  | 0.647 | 0.659  | 0.66  |
| 0.643 | 0.652 | 0.638 | 0.656 | 0.668  | 0.67  |
| 0.631 | 0.621 | 0.632 | 0.647 | 0.646  | 0.658 |
| 0.642 | 0.623 | 0.637 | 0.633 | 0.652  | 0.662 |

|       |       |       |       |       |       |
|-------|-------|-------|-------|-------|-------|
| 0.527 | 0.57  | 0.575 | 0.643 | 0.523 | 0.651 |
| 0.517 | 0.604 | 0.581 | 0.637 | 0.506 | 0.64  |
| 0.58  | 0.618 | 0.533 | 0.604 | 0.535 | 0.641 |
| 0.554 | 0.61  | 0.57  | 0.631 | 0.539 | 0.671 |
| 0.518 | 0.491 | 0.499 | 0.541 | 0.44  | 0.538 |
| 0.524 | 0.569 | 0.569 | 0.568 | 0.483 | 0.574 |
| 0.543 | 0.548 | 0.507 | 0.566 | 0.465 | 0.535 |
| 0.549 | 0.588 | 0.553 | 0.568 | 0.479 | 0.574 |
| 0.747 | 0.641 | 0.647 | 0.702 | 0.635 | 0.73  |
| 0.768 | 0.714 | 0.692 | 0.72  | 0.641 | 0.747 |
| 0.741 | 0.692 | 0.651 | 0.703 | 0.632 | 0.708 |
| 0.737 | 0.704 | 0.649 | 0.704 | 0.64  | 0.756 |
| 0.217 | 0.23  | 0.222 | 0.235 | 0.226 | 0.247 |
| 0.203 | 0.254 | 0.246 | 0.246 | 0.224 | 0.257 |
| 0.229 | 0.237 | 0.218 | 0.234 | 0.212 | 0.222 |
| 0.207 | 0.241 | 0.213 | 0.234 | 0.223 | 0.242 |
| 0.519 | 0.26  | 0.204 | 0.21  | 0.199 | 0.248 |
| 0.467 | 0.292 | 0.216 | 0.221 | 0.196 | 0.261 |
| 0.585 | 0.27  | 0.191 | 0.193 | 0.189 | 0.24  |
| 0.486 | 0.288 | 0.192 | 0.205 | 0.198 | 0.238 |
| 0.857 | 0.609 | 0.483 | 0.49  | 0.477 | 0.594 |
| 0.808 | 0.689 | 0.515 | 0.53  | 0.496 | 0.622 |
| 0.985 | 0.639 | 0.458 | 0.464 | 0.45  | 0.561 |
| 0.885 | 0.659 | 0.474 | 0.466 | 0.463 | 0.579 |
| 0.531 | 0.408 | 0.397 | 0.284 | 0.35  | 0.257 |
| 0.534 | 0.635 | 0.411 | 0.291 | 0.348 | 0.227 |
| 0.293 | 0.348 | 0.446 | 0.276 | 0.367 | 0.267 |
| 0.277 | 0.615 | 0.499 | 0.3   | 0.339 | 0.261 |
| 0.397 | 0.382 | 0.419 | 0.465 | 0.405 | 0.415 |
| 0.417 | 0.432 | 0.451 | 0.465 | 0.407 | 0.421 |
| 0.423 | 0.396 | 0.406 | 0.454 | 0.429 | 0.407 |
| 0.413 | 0.441 | 0.446 | 0.458 | 0.429 | 0.425 |
| 0.557 | 0.543 | 0.562 | 0.53  | 0.534 | 0.498 |
| 0.564 | 0.552 | 0.557 | 0.548 | 0.542 | 0.517 |
| 0.552 | 0.549 | 0.577 | 0.521 | 0.523 | 0.505 |
| 0.547 | 0.542 | 0.57  | 0.537 | 0.539 | 0.513 |
| 0.845 | 0.732 | 0.673 | 0.675 | 0.59  | 0.658 |
| 0.775 | 0.845 | 0.749 | 0.754 | 0.622 | 0.721 |
| 0.861 | 0.815 | 0.694 | 0.726 | 0.604 | 0.639 |
| 0.85  | 0.892 | 0.751 | 0.754 | 0.615 | 0.705 |

|       |       |       |        |       |        |
|-------|-------|-------|--------|-------|--------|
| 0.711 | 0.579 | 0.593 | 0.645  | 0.621 | 0.646  |
| 0.683 | 0.661 | 0.602 | 0.65   | 0.633 | 0.626  |
| 0.738 | 0.628 | 0.58  | 0.606  | 0.631 | 0.633  |
| 0.717 | 0.628 | 0.596 | 0.6    | 0.62  | 0.616  |
| 0.084 | 0.055 | 0.059 | 0.073  | 0.042 | 0.074  |
| 0.062 | 0.093 | 0.08  | 0.078  | 0.037 | 0.086  |
| 0.111 | 0.067 | 0.047 | 0.057  | 0.038 | 0.066  |
| 0.083 | 0.091 | 0.063 | 0.062  | 0.044 | 0.08   |
| 0.301 | 0.297 | 0.285 | 0.286  | 0.286 | 0.282  |
| 0.336 | 0.292 | 0.329 | 0.318  | 0.353 | 0.339  |
| 0.304 | 0.291 | 0.273 | 0.274  | 0.269 | 0.276  |
| 0.367 | 0.354 | 0.286 | 0.311  | 0.324 | 0.366  |
| 0.555 | 0.516 | 0.5   | 0.496  | 0.489 | 0.479  |
| 0.588 | 0.559 | 0.588 | 0.55   | 0.508 | 0.57   |
| 0.575 | 0.555 | 0.52  | 0.518  | 0.51  | 0.516  |
| 0.61  | 0.563 | 0.524 | 0.534  | 0.525 | 0.547  |
| 0.422 | 0.414 | 0.406 | 0.391  | 0.403 | 0.405  |
| 0.4   | 0.387 | 0.366 | 0.37   | 0.373 | 0.383  |
| 0.446 | 0.428 | 0.405 | 0.395  | 0.417 | 0.419  |
| 0.419 | 0.402 | 0.392 | 0.41   | 0.415 | 0.43   |
| 0.664 | 0.684 | 0.623 | 0.619  | 0.603 | 0.661  |
| 0.685 | 0.648 | 0.571 | 0.614  | 0.563 | 0.678  |
| 0.714 | 0.765 | 0.66  | 0.676  | 0.636 | 0.727  |
| 0.784 | 0.792 | 0.661 | 0.6363 | 0.739 | 0.783  |
| 0.718 | 0.747 | 0.738 | 0.71   | 0.627 | 0.634  |
| 0.624 | 0.623 | 0.643 | 0.623  | 0.527 | 0.571  |
| 0.894 | 0.844 | 0.906 | 0.747  | 0.702 | 0.838  |
| 0.752 | 0.654 | 0.891 | 0.903  | 0.791 | 0.756  |
| 0.672 | 0.685 | 0.64  | 0.687  | 0.617 | 0.598  |
| 0.596 | 0.598 | 0.511 | 0.578  | 0.53  | 0.577  |
| 0.519 | 0.601 | 0.577 | 0.567  | 0.526 | 0.554  |
| 0.751 | 0.628 | 0.523 | 0.597  | 0.695 | 0.5763 |
| 0.458 | 0.786 | 0.971 | 0.891  | 0.764 | 0.75   |
| 0.405 | 0.666 | 0.782 | 0.799  | 0.657 | 0.656  |
| 0.511 | 0.754 | 0.94  | 0.798  | 0.701 | 0.809  |
| 0.509 | 0.675 | 0.898 | 0.845  | 0.754 | 0.751  |

|        |       |       |       |       |        |
|--------|-------|-------|-------|-------|--------|
| 0.192  | 0.461 | 0.694 | 0.749 | 0.723 | 0.73   |
| 0.194  | 0.371 | 0.577 | 0.685 | 0.637 | 0.669  |
| 0.215  | 0.393 | 0.656 | 0.638 | 0.651 | 0.7    |
| 0.186  | 0.297 | 0.531 | 0.53  | 0.467 | 0.569  |
| 0.444  | 0.374 | 0.323 | 0.314 | 0.31  | 0.332  |
| 0.524  | 0.422 | 0.363 | 0.389 | 0.305 | 0.3313 |
| 0.441  | 0.354 | 0.287 | 0.301 | 0.298 | 0.313  |
| 0.4697 | 0.429 | 0.344 | 0.321 | 0.307 | 0.349  |
| 0.343  | 0.386 | 0.338 | 0.344 | 0.373 | 0.373  |
| 0.373  | 0.369 | 0.433 | 0.392 | 0.347 | 0.346  |
| 0.419  | 0.393 | 0.334 | 0.325 | 0.33  | 0.34   |
| 0.369  | 0.357 | 0.357 | 0.363 | 0.338 | 0.325  |
| 0.11   | 0.074 | 0.145 | 0.14  | 0.121 | 0.084  |
| 0.063  | 0.025 | 0.122 | 0.096 | 0.072 | 0.069  |
| 0.236  | 0.302 | 0.19  | 0.204 | 0.219 | 0.3    |
| 0.399  | 0.345 | 0.339 | 0.433 | 0.365 | 0.308  |
| 0.376  | 0.406 | 0.403 | 0.374 | 0.393 | 0.496  |
| 0.518  | 0.501 | 0.608 | 0.512 | 0.585 | 0.629  |
| 0.52   | 0.544 | 0.524 | 0.476 | 0.5   | 0.556  |
| 0.657  | 0.723 | 0.61  | 0.582 | 0.605 | 0.5603 |
| 0.861  | 0.839 | 0.87  | 0.796 | 0.821 | 0.878  |
| 0.813  | 0.752 | 0.758 | 0.761 | 0.683 | 0.806  |
| 0.943  | 0.999 | 0.934 | 0.859 | 0.862 | 0.943  |
| 0.957  | 1.001 | 0.944 | 0.891 | 0.859 | 0.995  |
| 0.229  | 0.267 | 0.245 | 0.277 | 0.261 | 0.269  |
| 0.216  | 0.251 | 0.221 | 0.268 | 0.235 | 0.252  |
| 0.236  | 0.268 | 0.263 | 0.28  | 0.26  | 0.26   |
| 0.186  | 0.262 | 0.22  | 0.273 | 0.28  | 0.2603 |
| 0.719  | 0.356 | 0.271 | 0.225 | 0.224 | 0.287  |
| 0.602  | 0.307 | 0.239 | 0.209 | 0.202 | 0.282  |
| 0.704  | 0.4   | 0.302 | 0.252 | 0.253 | 0.295  |
| 0.741  | 0.405 | 0.277 | 0.242 | 0.278 | 0.333  |
| 1.017  | 0.786 | 0.53  | 0.553 | 0.573 | 0.63   |
| 0.922  | 0.697 | 0.468 | 0.508 | 0.491 | 0.577  |
| 1.052  | 0.848 | 0.55  | 0.566 | 0.57  | 0.655  |
| 1.031  | 0.817 | 0.531 | 0.586 | 0.593 | 0.679  |
| 0.543  | 0.54  | 0.436 | 0.384 | 0.348 | 0.323  |
| 0.484  | 0.378 | 0.427 | 0.351 | 0.378 | 0.271  |
| 0.47   | 0.427 | 0.388 | 0.35  | 0.295 | 0.347  |

|       |       |       |        |        |        |
|-------|-------|-------|--------|--------|--------|
| 0.463 | 0.427 | 0.357 | 0.345  | 0.323  | 0.375  |
| 0.434 | 0.448 | 0.451 | 0.425  | 0.427  | 0.446  |
| 0.47  | 0.481 | 0.507 | 0.473  | 0.4477 | 0.513  |
| 0.458 | 0.468 | 0.463 | 0.453  | 0.442  | 0.465  |
| 0.506 | 0.494 | 0.487 | 0.458  | 0.474  | 0.473  |
| 0.626 | 0.596 | 0.585 | 0.572  | 0.544  | 0.639  |
| 0.687 | 0.613 | 0.624 | 0.667  | 0.691  | 0.71   |
| 0.651 | 0.632 | 0.61  | 0.597  | 0.567  | 0.649  |
| 0.701 | 0.731 | 0.613 | 0.64   | 0.617  | 0.733  |
| 1.014 | 1.08  | 0.833 | 0.737  | 0.806  | 0.846  |
| 1.127 | 1.116 | 1.095 | 0.89   | 0.805  | 0.8173 |
| 1.078 | 1.123 | 0.84  | 0.757  | 0.808  | 0.804  |
| 1.162 | 1.068 | 0.873 | 0.808  | 0.801  | 0.802  |
| 0.848 | 0.776 | 0.714 | 0.758  | 0.726  | 0.718  |
| 0.808 | 0.763 | 0.682 | 0.732  | 0.699  | 0.71   |
| 0.842 | 0.802 | 0.726 | 0.761  | 0.725  | 0.766  |
| 0.853 | 0.875 | 0.706 | 0.777  | 0.779  | 0.834  |
| 0.089 | 0.11  | 0.082 | 0.071  | 0.062  | 0.094  |
| 0.072 | 0.081 | 0.058 | 0.057  | 0.06   | 0.088  |
| 0.09  | 0.115 | 0.086 | 0.086  | 0.082  | 0.102  |
| 0.09  | 0.111 | 0.081 | 0.075  | 0.103  | 0.119  |
| 0.283 | 0.287 | 0.294 | 0.297  | 0.288  | 0.288  |
| 0.309 | 0.298 | 0.286 | 0.289  | 0.277  | 0.295  |
| 0.279 | 0.318 | 0.31  | 0.319  | 0.298  | 0.32   |
| 0.299 | 0.314 | 0.328 | 0.3017 | 0.304  | 0.327  |
| 0.525 | 0.46  | 0.446 | 0.444  | 0.465  | 0.431  |
| 0.553 | 0.478 | 0.454 | 0.448  | 0.459  | 0.422  |
| 0.513 | 0.502 | 0.471 | 0.489  | 0.481  | 0.476  |
| 0.539 | 0.512 | 0.513 | 0.495  | 0.496  | 0.477  |
| 0.445 | 0.417 | 0.389 | 0.41   | 0.451  | 0.433  |
| 0.417 | 0.434 | 0.4   | 0.391  | 0.416  | 0.427  |
| 0.427 | 0.401 | 0.387 | 0.398  | 0.421  | 0.395  |
| 0.429 | 0.401 | 0.379 | 0.392  | 0.418  | 0.4    |
| 0.69  | 0.691 | 0.7   | 0.674  | 0.666  | 0.695  |
| 0.672 | 0.708 | 0.697 | 0.679  | 0.658  | 0.684  |
| 0.672 | 0.65  | 0.68  | 0.651  | 0.647  | 0.675  |

|        |       |       |       |        |        |
|--------|-------|-------|-------|--------|--------|
| 0.659  | 0.681 | 0.68  | 0.671 | 0.626  | 0.664  |
| 0.853  | 0.966 | 0.886 | 0.814 | 0.819  | 0.887  |
| 0.719  | 0.934 | 0.848 | 0.775 | 0.785  | 0.755  |
| 0.857  | 0.744 | 0.76  | 0.7   | 0.676  | 0.809  |
| 0.747  | 0.783 | 0.758 | 0.705 | 0.674  | 0.754  |
| 0.733  | 0.736 | 0.684 | 0.704 | 0.632  | 0.721  |
| 0.511  | 0.573 | 0.666 | 0.66  | 0.688  | 0.675  |
| 0.72   | 0.581 | 0.669 | 0.63  | 0.643  | 0.592  |
| 0.602  | 0.629 | 0.611 | 0.677 | 0.678  | 0.58   |
| 0.635  | 0.906 | 0.996 | 0.938 | 0.882  | 0.915  |
| 0.503  | 0.915 | 0.944 | 0.936 | 0.854  | 0.827  |
| 0.683  | 0.785 | 0.877 | 0.851 | 0.8333 | 0.941  |
| 0.51   | 0.796 | 0.829 | 0.884 | 0.764  | 0.861  |
| 0.352  | 0.621 | 0.926 | 0.936 | 0.868  | 0.783  |
| 0.302  | 0.634 | 0.882 | 0.856 | 0.759  | 0.781  |
| 0.428  | 0.441 | 0.683 | 0.721 | 0.619  | 0.73   |
| 0.332  | 0.45  | 0.67  | 0.776 | 0.702  | 0.757  |
| 1.026  | 0.848 | 0.706 | 0.606 | 0.683  | 0.7977 |
| 1.064  | 0.818 | 0.703 | 0.616 | 0.687  | 0.73   |
| 1.052  | 0.902 | 0.73  | 0.65  | 0.7    | 0.849  |
| 1.002  | 0.879 | 0.783 | 0.642 | 0.729  | 0.814  |
| 0.701  | 0.649 | 0.656 | 0.697 | 0.699  | 0.671  |
| 0.719  | 0.678 | 0.668 | 0.712 | 0.667  | 0.658  |
| 0.696  | 0.721 | 0.684 | 0.74  | 0.682  | 0.71   |
| 0.7053 | 0.704 | 0.769 | 0.748 | 0.695  | 0.752  |
| 0.709  | 0.84  | 0.808 | 0.799 | 0.817  | 0.832  |
| 0.667  | 0.853 | 0.768 | 0.762 | 0.767  | 0.84   |
| 0.726  | 0.775 | 0.753 | 0.726 | 0.745  | 0.792  |
| 0.712  | 0.804 | 0.729 | 0.728 | 0.745  | 0.789  |
| 0.309  | 0.255 | 0.252 | 0.22  | 0.36   | 0.288  |
| 0.304  | 0.265 | 0.231 | 0.314 | 0.267  | 0.268  |
| 0.244  | 0.386 | 0.351 | 0.346 | 0.318  | 0.344  |
| 0.404  | 0.398 | 0.489 | 0.341 | 0.319  | 0.363  |
| 0.853  | 0.792 | 0.734 | 0.732 | 0.723  | 0.774  |
| 0.79   | 0.815 | 0.744 | 0.743 | 0.698  | 0.741  |
| 0.844  | 0.71  | 0.704 | 0.713 | 0.656  | 0.709  |
| 0.804  | 0.746 | 0.67  | 0.702 | 0.667  | 0.724  |
| 0.242  | 0.27  | 0.283 | 0.274 | 0.284  | 0.283  |
| 0.216  | 0.282 | 0.277 | 0.267 | 0.269  | 0.273  |

|       |       |       |        |        |        |
|-------|-------|-------|--------|--------|--------|
| 0.252 | 0.244 | 0.262 | 0.254  | 0.244  | 0.247  |
| 0.231 | 0.254 | 0.252 | 0.232  | 0.245  | 0.264  |
| 0.695 | 0.431 | 0.31  | 0.272  | 0.309  | 0.406  |
| 0.683 | 0.43  | 0.284 | 0.279  | 0.319  | 0.393  |
| 0.702 | 0.388 | 0.282 | 0.245  | 0.252  | 0.372  |
| 0.656 | 0.388 | 0.269 | 0.257  | 0.291  | 0.378  |
| 1.091 | 0.77  | 0.636 | 0.533  | 0.6    | 0.701  |
| 0.976 | 0.76  | 0.603 | 0.536  | 0.605  | 0.722  |
| 1.056 | 0.717 | 0.598 | 0.498  | 0.513  | 0.664  |
| 0.975 | 0.696 | 0.583 | 0.514  | 0.538  | 0.657  |
| 0.597 | 0.341 | 0.501 | 0.431  | 0.458  | 0.406  |
| 0.526 | 0.644 | 0.543 | 0.475  | 0.455  | 0.394  |
| 0.328 | 0.399 | 0.5   | 0.327  | 0.324  | 0.336  |
| 0.397 | 0.548 | 0.456 | 0.303  | 0.333  | 0.327  |
| 0.442 | 0.454 | 0.46  | 0.474  | 0.47   | 0.472  |
| 0.459 | 0.472 | 0.449 | 0.47   | 0.451  | 0.478  |
| 0.462 | 0.482 | 0.466 | 0.487  | 0.457  | 0.483  |
| 0.488 | 0.482 | 0.509 | 0.491  | 0.464  | 0.4777 |
| 0.581 | 0.541 | 0.542 | 0.528  | 0.586  | 0.572  |
| 0.605 | 0.549 | 0.55  | 0.536  | 0.568  | 0.567  |
| 0.576 | 0.587 | 0.57  | 0.564  | 0.584  | 0.609  |
| 0.575 | 0.578 | 0.591 | 0.574  | 0.598  | 0.612  |
| 0.913 | 0.991 | 0.825 | 0.757  | 0.72   | 0.704  |
| 0.99  | 1.028 | 0.803 | 0.748  | 0.717  | 0.708  |
| 0.928 | 1.226 | 0.95  | 0.878  | 0.792  | 0.879  |
| 1.028 | 1.191 | 1.114 | 0.878  | 0.783  | 0.936  |
| 0.711 | 0.686 | 0.613 | 0.613  | 0.601  | 0.629  |
| 0.658 | 0.69  | 0.601 | 0.614  | 0.609  | 0.622  |
| 0.694 | 0.648 | 0.586 | 0.593  | 0.566  | 0.618  |
| 0.674 | 0.659 | 0.586 | 0.599  | 0.571  | 0.595  |
| 0.054 | 0.074 | 0.057 | 0.047  | 0.056  | 0.077  |
| 0.057 | 0.083 | 0.049 | 0.042  | 0.045  | 0.08   |
| 0.065 | 0.057 | 0.053 | 0.051  | 0.048  | 0.0783 |
| 0.063 | 0.069 | 0.053 | 0.0467 | 0.0497 | 0.078  |
| 0.302 | 0.283 | 0.281 | 0.283  | 0.277  | 0.281  |
| 0.318 | 0.269 | 0.277 | 0.285  | 0.283  | 0.285  |

|       |       |       |        |       |        |
|-------|-------|-------|--------|-------|--------|
| 0.297 | 0.284 | 0.288 | 0.29   | 0.283 | 0.2853 |
| 0.303 | 0.281 | 0.287 | 0.288  | 0.283 | 0.29   |
| 0.491 | 0.483 | 0.443 | 0.455  | 0.429 | 0.445  |
| 0.487 | 0.465 | 0.436 | 0.459  | 0.438 | 0.454  |
| 0.482 | 0.506 | 0.466 | 0.474  | 0.426 | 0.456  |
| 0.483 | 0.492 | 0.464 | 0.463  | 0.418 | 0.439  |
| 0.377 | 0.3   | 0.347 | 0.35   | 0.362 | 0.391  |
| 0.412 | 0.319 | 0.348 | 0.349  | 0.356 | 0.384  |
| 0.278 | 0.407 | 0.419 | 0.406  | 0.386 | 0.411  |
| 0.386 | 0.383 | 0.388 | 0.398  | 0.367 | 0.379  |
| 0.632 | 0.631 | 0.601 | 0.575  | 0.641 | 0.591  |
| 0.691 | 0.612 | 0.598 | 0.578  | 0.646 | 0.58   |
| 0.608 | 0.666 | 0.638 | 0.622  | 0.661 | 0.604  |
| 0.66  | 0.649 | 0.62  | 0.616  | 0.668 | 0.607  |
| 0.691 | 0.671 | 0.625 | 0.595  | 0.651 | 0.677  |
| 0.72  | 0.772 | 0.646 | 0.602  | 0.647 | 0.696  |
| 0.674 | 0.752 | 0.659 | 0.618  | 0.631 | 0.662  |
| 0.647 | 0.674 | 0.586 | 0.721  | 0.767 | 0.67   |
| 0.559 | 0.602 | 0.587 | 0.58   | 0.588 | 0.586  |
| 0.674 | 0.644 | 0.614 | 0.623  | 0.632 | 0.574  |
| 0.564 | 0.666 | 0.601 | 0.664  | 0.595 | 0.634  |
| 0.574 | 0.621 | 0.588 | 0.591  | 0.579 | 0.585  |
| 0.597 | 0.81  | 0.724 | 0.67   | 0.705 | 0.69   |
| 0.661 | 0.926 | 0.829 | 0.767  | 0.754 | 0.782  |
| 0.707 | 0.909 | 0.814 | 0.795  | 0.788 | 0.803  |
| 0.629 | 0.843 | 0.822 | 0.798  | 0.786 | 0.818  |
| 0.438 | 0.721 | 0.808 | 0.826  | 0.828 | 0.865  |
| 0.433 | 0.725 | 0.843 | 0.863  | 0.845 | 0.864  |
| 0.461 | 0.725 | 0.851 | 0.8353 | 0.829 | 0.874  |
| 0.496 | 0.738 | 0.829 | 0.817  | 0.773 | 0.809  |
| 0.916 | 0.746 | 0.661 | 0.619  | 0.635 | 0.667  |
| 1.026 | 0.738 | 0.662 | 0.637  | 0.642 | 0.683  |
| 0.965 | 0.775 | 0.7   | 0.676  | 0.664 | 0.707  |
| 0.906 | 0.734 | 0.67  | 0.649  | 0.679 | 0.72   |
| 0.67  | 0.705 | 0.708 | 0.683  | 0.652 | 0.656  |
| 0.701 | 0.68  | 0.707 | 0.684  | 0.648 | 0.661  |
| 0.708 | 0.705 | 0.714 | 0.677  | 0.635 | 0.667  |
| 0.668 | 0.666 | 0.713 | 0.672  | 0.635 | 0.654  |
| 0.543 | 0.697 | 0.634 | 0.706  | 0.659 | 0.723  |

|       |       |       |        |       |       |
|-------|-------|-------|--------|-------|-------|
| 0.617 | 0.658 | 0.654 | 0.674  | 0.684 | 0.741 |
| 0.562 | 0.676 | 0.639 | 0.736  | 0.658 | 0.765 |
| 0.537 | 0.621 | 0.602 | 0.625  | 0.632 | 0.754 |
| 0.372 | 0.548 | 0.457 | 0.438  | 0.426 | 0.393 |
| 0.241 | 0.48  | 0.409 | 0.378  | 0.389 | 0.349 |
| 0.44  | 0.325 | 0.335 | 0.324  | 0.261 | 0.223 |
| 0.323 | 0.26  | 0.273 | 0.315  | 0.241 | 0.333 |
| 0.59  | 0.596 | 0.558 | 0.586  | 0.564 | 0.602 |
| 0.675 | 0.592 | 0.555 | 0.561  | 0.565 | 0.605 |
| 0.588 | 0.652 | 0.615 | 0.635  | 0.6   | 0.643 |
| 0.616 | 0.615 | 0.579 | 0.605  | 0.591 | 0.626 |
| 0.207 | 0.228 | 0.215 | 0.219  | 0.222 | 0.223 |
| 0.229 | 0.228 | 0.225 | 0.215  | 0.221 | 0.217 |
| 0.201 | 0.242 | 0.247 | 0.241  | 0.232 | 0.238 |
| 0.211 | 0.223 | 0.226 | 0.229  | 0.234 | 0.231 |
| 0.573 | 0.298 | 0.206 | 0.211  | 0.232 | 0.274 |
| 0.619 | 0.263 | 0.211 | 0.219  | 0.236 | 0.28  |
| 0.414 | 0.367 | 0.261 | 0.253  | 0.257 | 0.31  |
| 0.562 | 0.338 | 0.229 | 0.243  | 0.263 | 0.303 |
| 0.844 | 0.652 | 0.475 | 0.486  | 0.526 | 0.528 |
| 1.009 | 0.633 | 0.501 | 0.503  | 0.506 | 0.524 |
| 0.863 | 0.652 | 0.534 | 0.529  | 0.533 | 0.557 |
| 0.818 | 0.613 | 0.482 | 0.495  | 0.522 | 0.553 |
| 0.5   | 0.173 | 0.365 | 0.306  | 0.277 | 0.289 |
| 0.521 | 0.438 | 0.325 | 0.31   | 0.269 | 0.313 |
| 0.163 | 0.316 | 0.385 | 0.333  | 0.31  | 0.32  |
| 0.336 | 0.447 | 0.373 | 0.338  | 0.3   | 0.321 |
| 0.453 | 0.494 | 0.498 | 0.453  | 0.454 | 0.452 |
| 0.475 | 0.496 | 0.498 | 0.462  | 0.452 | 0.456 |
| 0.458 | 0.499 | 0.494 | 0.449  | 0.457 | 0.452 |
| 0.461 | 0.489 | 0.491 | 0.446  | 0.458 | 0.448 |
| 0.613 | 0.633 | 0.596 | 0.595  | 0.59  | 0.586 |
| 0.639 | 0.636 | 0.604 | 0.604  | 0.591 | 0.578 |
| 0.613 | 0.617 | 0.599 | 0.6003 | 0.585 | 0.598 |
| 0.639 | 0.613 | 0.591 | 0.602  | 0.593 | 0.597 |
| 0.878 | 0.893 | 0.658 | 0.642  | 0.625 | 0.611 |
| 0.883 | 0.883 | 0.702 | 0.657  | 0.629 | 0.65  |
| 0.878 | 0.974 | 0.751 | 0.7    | 0.657 | 0.673 |
| 0.893 | 0.916 | 0.758 | 0.679  | 0.655 | 0.664 |

|       |       |        |       |       |        |
|-------|-------|--------|-------|-------|--------|
| 0.639 | 0.616 | 0.62   | 0.603 | 0.588 | 0.587  |
| 0.678 | 0.598 | 0.63   | 0.626 | 0.569 | 0.595  |
| 0.651 | 0.632 | 0.646  | 0.638 | 0.574 | 0.616  |
| 0.633 | 0.611 | 0.638  | 0.633 | 0.585 | 0.611  |
| 0.058 | 0.075 | 0.06   | 0.056 | 0.063 | 0.099  |
| 0.07  | 0.07  | 0.056  | 0.049 | 0.057 | 0.09   |
| 0.064 | 0.082 | 0.068  | 0.061 | 0.059 | 0.097  |
| 0.055 | 0.066 | 0.053  | 0.045 | 0.05  | 0.077  |
| 0.267 | 0.28  | 0.274  | 0.27  | 0.263 | 0.267  |
| 0.271 | 0.278 | 0.276  | 0.27  | 0.263 | 0.258  |
| 0.28  | 0.281 | 0.281  | 0.276 | 0.265 | 0.2625 |
| 0.293 | 0.287 | 0.268  | 0.271 | 0.263 | 0.2625 |
| 0.461 | 0.484 | 0.405  | 0.419 | 0.419 | 0.39   |
| 0.467 | 0.461 | 0.418  | 0.444 | 0.418 | 0.376  |
| 0.45  | 0.476 | 0.427  | 0.435 | 0.437 | 0.382  |
| 0.475 | 0.499 | 0.4    | 0.452 | 0.431 | 0.418  |
| 0.388 | 0.419 | 0.386  | 0.387 | 0.372 | 0.385  |
| 0.37  | 0.431 | 0.392  | 0.403 | 0.365 | 0.367  |
| 0.393 | 0.427 | 0.384  | 0.392 | 0.365 | 0.3817 |
| 0.387 | 0.432 | 0.361  | 0.401 | 0.376 | 0.393  |
| 0.679 | 0.705 | 0.69   | 0.695 | 0.684 | 0.658  |
| 0.625 | 0.706 | 0.687  | 0.687 | 0.684 | 0.593  |
| 0.7   | 0.701 | 0.687  | 0.691 | 0.628 | 0.565  |
| 0.696 | 0.708 | 0.688  | 0.703 | 0.695 | 0.643  |
| 0.765 | 0.841 | 0.735  | 0.639 | 0.684 | 0.623  |
| 0.577 | 0.802 | 0.689  | 0.591 | 0.62  | 0.693  |
| 0.72  | 0.684 | 0.639  | 0.557 | 0.611 | 0.601  |
| 0.655 | 0.697 | 0.568  | 0.481 | 0.6   | 0.658  |
| 0.504 | 0.553 | 0.528  | 0.504 | 0.568 | 0.652  |
| 0.504 | 0.554 | 0.535  | 0.516 | 0.556 | 0.6    |
| 0.496 | 0.612 | 0.613  | 0.493 | 0.534 | 0.54   |
| 0.577 | 0.508 | 0.495  | 0.543 | 0.53  | 0.538  |
| 0.797 | 0.99  | 0.948  | 0.904 | 0.883 | 0.925  |
| 0.568 | 0.993 | 0.943  | 0.99  | 0.856 | 0.934  |
| 0.722 | 0.846 | 0.847  | 0.833 | 0.815 | 0.773  |
| 0.603 | 0.833 | 0.9127 | 0.77  | 0.773 | 0.931  |

|       |       |        |       |       |        |
|-------|-------|--------|-------|-------|--------|
| 0.432 | 0.708 | 0.903  | 0.928 | 0.828 | 0.772  |
| 0.331 | 0.808 | 0.922  | 0.955 | 0.827 | 0.782  |
| 0.46  | 0.675 | 0.882  | 0.944 | 0.85  | 0.7    |
| 0.383 | 0.717 | 0.742  | 0.887 | 0.834 | 0.837  |
| 0.936 | 0.753 | 0.673  | 0.597 | 0.629 | 0.668  |
| 0.901 | 0.759 | 0.679  | 0.595 | 0.591 | 0.626  |
| 0.918 | 0.759 | 0.687  | 0.602 | 0.639 | 0.613  |
| 0.93  | 0.741 | 0.595  | 0.595 | 0.626 | 0.7    |
| 0.606 | 0.645 | 0.619  | 0.613 | 0.582 | 0.585  |
| 0.604 | 0.617 | 0.611  | 0.617 | 0.595 | 0.571  |
| 0.606 | 0.643 | 0.621  | 0.608 | 0.593 | 0.58   |
| 0.628 | 0.641 | 0.59   | 0.627 | 0.589 | 0.61   |
| 0.437 | 0.504 | 0.531  | 0.514 | 0.492 | 0.513  |
| 0.415 | 0.5   | 0.535  | 0.497 | 0.489 | 0.443  |
| 0.435 | 0.465 | 0.502  | 0.481 | 0.487 | 0.424  |
| 0.458 | 0.49  | 0.443  | 0.474 | 0.488 | 0.529  |
| 0.228 | 0.267 | 0.261  | 0.274 | 0.253 | 0.237  |
| 0.253 | 0.269 | 0.26   | 0.261 | 0.236 | 0.196  |
| 0.283 | 0.295 | 0.305  | 0.277 | 0.275 | 0.208  |
| 0.301 | 0.291 | 0.215  | 0.294 | 0.282 | 0.325  |
| 0.715 | 0.739 | 0.664  | 0.654 | 0.66  | 0.663  |
| 0.702 | 0.743 | 0.669  | 0.647 | 0.652 | 0.636  |
| 0.739 | 0.73  | 0.674  | 0.648 | 0.666 | 0.626  |
| 0.727 | 0.747 | 0.621  | 0.661 | 0.673 | 0.6417 |
| 0.215 | 0.257 | 0.218  | 0.234 | 0.219 | 0.189  |
| 0.205 | 0.236 | 0.218  | 0.227 | 0.211 | 0.175  |
| 0.216 | 0.225 | 0.234  | 0.242 | 0.214 | 0.166  |
| 0.221 | 0.25  | 0.2233 | 0.244 | 0.234 | 0.222  |
| 0.632 | 0.451 | 0.276  | 0.254 | 0.285 | 0.311  |
| 0.537 | 0.437 | 0.278  | 0.272 | 0.282 | 0.274  |
| 0.647 | 0.422 | 0.273  | 0.248 | 0.283 | 0.258  |
| 0.679 | 0.437 | 0.221  | 0.257 | 0.286 | 0.317  |
| 1.07  | 0.749 | 0.572  | 0.554 | 0.552 | 0.593  |
| 0.923 | 0.761 | 0.578  | 0.568 | 0.53  | 0.574  |
| 1.052 | 0.713 | 0.553  | 0.526 | 0.535 | 0.52   |
| 0.806 | 0.726 | 0.475  | 0.547 | 0.543 | 0.619  |
| 0.607 | 0.319 | 0.419  | 0.296 | 0.319 | 0.342  |
| 0.577 | 0.522 | 0.434  | 0.298 | 0.312 | 0.356  |
| 0.308 | 0.283 | 0.43   | 0.308 | 0.293 | 0.369  |
| 0.278 | 0.571 | 0.522  | 0.234 | 0.307 | 0.323  |

|        |       |       |        |       |       |
|--------|-------|-------|--------|-------|-------|
| 0.402  | 0.468 | 0.437 | 0.428  | 0.454 | 0.432 |
| 0.418  | 0.466 | 0.443 | 0.432  | 0.453 | 0.412 |
| 0.412  | 0.478 | 0.468 | 0.447  | 0.476 | 0.418 |
| 0.416  | 0.479 | 0.409 | 0.458  | 0.471 | 0.473 |
| 0.566  | 0.568 | 0.516 | 0.54   | 0.534 | 0.548 |
| 0.587  | 0.558 | 0.529 | 0.5577 | 0.574 | 0.516 |
| 0.577  | 0.545 | 0.503 | 0.561  | 0.589 | 0.523 |
| 0.59   | 0.583 | 0.497 | 0.572  | 0.585 | 0.573 |
| 0.811  | 0.845 | 0.684 | 0.62   | 0.567 | 0.531 |
| 0.828  | 0.846 | 0.72  | 0.656  | 0.562 | 0.5   |
| 0.823  | 0.866 | 0.785 | 0.679  | 0.617 | 0.505 |
| 0.876  | 0.87  | 0.625 | 0.693  | 0.631 | 0.579 |
| 0.702  | 0.606 | 0.537 | 0.598  | 0.541 | 0.543 |
| 0.639  | 0.621 | 0.541 | 0.613  | 0.539 | 0.531 |
| 0.675  | 0.603 | 0.525 | 0.576  | 0.513 | 0.511 |
| 0.648  | 0.615 | 0.484 | 0.594  | 0.533 | 0.557 |
| 0.1    | 0.157 | 0.099 | 0.092  | 0.083 | 0.099 |
| 0.08   | 0.172 | 0.107 | 0.102  | 0.095 | 0.08  |
| 0.124  | 0.126 | 0.09  | 0.081  | 0.082 | 0.061 |
| 0.118  | 0.148 | 0.055 | 0.087  | 0.087 | 0.08  |
| 0.311  | 0.325 | 0.302 | 0.298  | 0.327 | 0.298 |
| 0.3123 | 0.328 | 0.303 | 0.294  | 0.315 | 0.287 |
| 0.315  | 0.32  | 0.297 | 0.295  | 0.313 | 0.267 |
| 0.311  | 0.319 | 0.301 | 0.293  | 0.318 | 0.29  |
| 0.502  | 0.491 | 0.462 | 0.45   | 0.458 | 0.467 |
| 0.497  | 0.505 | 0.481 | 0.467  | 0.452 | 0.44  |
| 0.532  | 0.462 | 0.446 | 0.444  | 0.442 | 0.424 |
| 0.501  | 0.473 | 0.444 | 0.433  | 0.43  | 0.425 |
| 0.4103 | 0.403 | 0.4   | 0.415  | 0.396 | 0.408 |
| 0.405  | 0.403 | 0.394 | 0.427  | 0.392 | 0.4   |
| 0.413  | 0.401 | 0.402 | 0.435  | 0.405 | 0.411 |
| 0.413  | 0.41  | 0.408 | 0.435  | 0.399 | 0.405 |
| 0.722  | 0.699 | 0.688 | 0.655  | 0.679 | 0.72  |
| 0.71   | 0.705 | 0.667 | 0.668  | 0.67  | 0.726 |
| 0.722  | 0.697 | 0.665 | 0.684  | 0.669 | 0.725 |
| 0.728  | 0.715 | 0.698 | 0.694  | 0.685 | 0.687 |

|       |       |       |        |       |       |
|-------|-------|-------|--------|-------|-------|
| 0.77  | 0.871 | 0.845 | 0.7    | 0.779 | 0.868 |
| 0.671 | 0.88  | 0.855 | 0.736  | 0.76  | 0.888 |
| 0.825 | 0.723 | 0.749 | 0.653  | 0.709 | 0.702 |
| 0.797 | 0.824 | 0.823 | 0.674  | 0.734 | 0.744 |
| 0.567 | 0.628 | 0.538 | 0.538  | 0.6   | 0.634 |
| 0.557 | 0.644 | 0.572 | 0.599  | 0.578 | 0.627 |
| 0.635 | 0.576 | 0.519 | 0.544  | 0.559 | 0.527 |
| 0.615 | 0.623 | 0.565 | 0.58   | 0.566 | 0.544 |
| 0.686 | 0.984 | 0.987 | 0.922  | 0.93  | 1.087 |
| 0.615 | 1.013 | 1.079 | 1.025  | 0.919 | 1.035 |
| 0.78  | 0.841 | 0.859 | 0.956  | 0.903 | 0.773 |
| 0.725 | 0.941 | 0.967 | 0.92   | 0.873 | 0.852 |
| 0.381 | 0.569 | 0.774 | 0.859  | 0.918 | 0.966 |
| 0.337 | 0.624 | 0.814 | 0.874  | 0.873 | 0.898 |
| 0.412 | 0.549 | 0.797 | 0.913  | 0.898 | 0.827 |
| 0.416 | 0.643 | 0.878 | 0.935  | 0.935 | 0.868 |
| 1.016 | 0.906 | 0.762 | 0.647  | 0.72  | 0.784 |
| 0.876 | 0.872 | 0.754 | 0.662  | 0.719 | 0.807 |
| 0.992 | 0.78  | 0.69  | 0.605  | 0.664 | 0.692 |
| 0.95  | 0.803 | 0.687 | 0.61   | 0.67  | 0.715 |
| 0.654 | 0.646 | 0.653 | 0.638  | 0.652 | 0.655 |
| 0.617 | 0.644 | 0.654 | 0.646  | 0.651 | 0.642 |
| 0.671 | 0.614 | 0.617 | 0.609  | 0.615 | 0.617 |
| 0.625 | 0.625 | 0.636 | 0.609  | 0.614 | 0.618 |
| 0.627 | 0.704 | 0.775 | 0.711  | 0.739 | 0.784 |
| 0.608 | 0.72  | 0.752 | 0.719  | 0.721 | 0.775 |
| 0.643 | 0.685 | 0.734 | 0.695  | 0.707 | 0.673 |
| 0.669 | 0.702 | 0.754 | 0.709  | 0.731 | 0.693 |
| 0.299 | 0.298 | 0.296 | 0.284  | 0.307 | 0.314 |
| 0.226 | 0.295 | 0.295 | 0.301  | 0.305 | 0.303 |
| 0.344 | 0.256 | 0.243 | 0.235  | 0.251 | 0.248 |
| 0.266 | 0.27  | 0.272 | 0.277  | 0.248 | 0.212 |
| 0.693 | 0.742 | 0.693 | 0.7093 | 0.678 | 0.747 |
| 0.646 | 0.745 | 0.694 | 0.694  | 0.696 | 0.759 |
| 0.706 | 0.771 | 0.712 | 0.714  | 0.693 | 0.7   |
| 0.717 | 0.784 | 0.734 | 0.72   | 0.706 | 0.69  |
| 0.205 | 0.23  | 0.215 | 0.227  | 0.231 | 0.228 |
| 0.2   | 0.235 | 0.218 | 0.237  | 0.235 | 0.215 |
| 0.203 | 0.224 | 0.213 | 0.232  | 0.232 | 0.229 |

|       |       |       |       |        |       |
|-------|-------|-------|-------|--------|-------|
| 0.205 | 0.233 | 0.225 | 0.253 | 0.2327 | 0.206 |
| 0.632 | 0.403 | 0.275 | 0.257 | 0.28   | 0.323 |
| 0.606 | 0.394 | 0.276 | 0.263 | 0.28   | 0.321 |
| 0.734 | 0.389 | 0.278 | 0.262 | 0.273  | 0.292 |
| 0.572 | 0.4   | 0.289 | 0.269 | 0.271  | 0.3   |
| 1.068 | 0.799 | 0.621 | 0.554 | 0.588  | 0.661 |
| 1.026 | 0.788 | 0.613 | 0.57  | 0.575  | 0.673 |
| 0.863 | 0.791 | 0.613 | 0.568 | 0.565  | 0.601 |
| 1.078 | 0.765 | 0.619 | 0.577 | 0.59   | 0.623 |
| 0.634 | 0.375 | 0.445 | 0.333 | 0.284  | 0.311 |
| 0.595 | 0.54  | 0.458 | 0.335 | 0.286  | 0.324 |
| 0.348 | 0.338 | 0.465 | 0.337 | 0.312  | 0.316 |
| 0.347 | 0.607 | 0.434 | 0.354 | 0.298  | 0.354 |
| 0.438 | 0.434 | 0.418 | 0.431 | 0.44   | 0.43  |
| 0.42  | 0.44  | 0.419 | 0.44  | 0.431  | 0.435 |
| 0.445 | 0.417 | 0.421 | 0.43  | 0.428  | 0.43  |
| 0.43  | 0.438 | 0.425 | 0.421 | 0.421  | 0.425 |
| 0.57  | 0.568 | 0.567 | 0.558 | 0.557  | 0.549 |
| 0.564 | 0.58  | 0.563 | 0.573 | 0.54   | 0.552 |
| 0.583 | 0.56  | 0.548 | 0.569 | 0.553  | 0.543 |
| 0.562 | 0.561 | 0.552 | 0.551 | 0.541  | 0.548 |
| 0.934 | 0.934 | 0.766 | 0.649 | 0.657  | 0.65  |
| 0.826 | 0.924 | 0.78  | 0.681 | 0.672  | 0.665 |
| 0.997 | 0.85  | 0.744 | 0.629 | 0.63   | 0.604 |
| 0.896 | 0.866 | 0.746 | 0.651 | 0.638  | 0.591 |
| 0.707 | 0.617 | 0.6   | 0.603 | 0.62   | 0.622 |
| 0.676 | 0.617 | 0.588 | 0.603 | 0.616  | 0.637 |
| 0.741 | 0.62  | 0.585 | 0.602 | 0.61   | 0.605 |
| 0.713 | 0.617 | 0.61  | 0.62  | 0.609  | 0.598 |
| 0.089 | 0.101 | 0.088 | 0.065 | 0.071  | 0.104 |
| 0.081 | 0.11  | 0.074 | 0.074 | 0.06   | 0.089 |
| 0.096 | 0.099 | 0.083 | 0.082 | 0.07   | 0.087 |
| 0.106 | 0.121 | 0.104 | 0.086 | 0.079  | 0.084 |
| 0.271 | 0.296 | 0.28  | 0.307 | 0.287  | 0.279 |
| 0.296 | 0.298 | 0.289 | 0.305 | 0.292  | 0.281 |
| 0.299 | 0.3   | 0.287 | 0.306 | 0.295  | 0.279 |

|        |       |        |        |       |       |
|--------|-------|--------|--------|-------|-------|
| 0.294  | 0.301 | 0.294  | 0.306  | 0.296 | 0.287 |
| 0.469  | 0.502 | 0.414  | 0.443  | 0.419 | 0.448 |
| 0.468  | 0.502 | 0.476  | 0.489  | 0.434 | 0.455 |
| 0.545  | 0.502 | 0.425  | 0.461  | 0.46  | 0.466 |
| 0.503  | 0.515 | 0.44   | 0.485  | 0.462 | 0.468 |
| 0.371  | 0.387 | 0.378  | 0.4    | 0.369 | 0.392 |
| 0.352  | 0.385 | 0.414  | 0.42   | 0.389 | 0.409 |
| 0.408  | 0.381 | 0.37   | 0.399  | 0.379 | 0.38  |
| 0.387  | 0.393 | 0.391  | 0.396  | 0.366 | 0.388 |
| 0.65   | 0.732 | 0.675  | 0.728  | 0.685 | 0.717 |
| 0.63   | 0.744 | 0.713  | 0.734  | 0.714 | 0.742 |
| 0.734  | 0.721 | 0.6953 | 0.707  | 0.681 | 0.708 |
| 0.693  | 0.756 | 0.698  | 0.712  | 0.693 | 0.692 |
| 0.637  | 0.728 | 0.632  | 0.634  | 0.526 | 0.658 |
| 0.53   | 0.658 | 0.744  | 0.696  | 0.583 | 0.607 |
| 0.72   | 0.619 | 0.63   | 0.582  | 0.542 | 0.585 |
| 0.684  | 0.745 | 0.71   | 0.66   | 0.534 | 0.648 |
| 0.478  | 0.53  | 0.52   | 0.534  | 0.466 | 0.426 |
| 0.537  | 0.415 | 0.463  | 0.463  | 0.468 | 0.406 |
| 0.511  | 0.489 | 0.508  | 0.522  | 0.465 | 0.493 |
| 0.48   | 0.441 | 0.435  | 0.424  | 0.457 | 0.403 |
| 0.752  | 1.102 | 1.17   | 1.189  | 1.035 | 1.165 |
| 0.678  | 1.011 | 1.281  | 1.322  | 1.154 | 1.153 |
| 0.892  | 0.931 | 1.132  | 1.152  | 1.024 | 1.079 |
| 0.817  | 1.044 | 1.229  | 1.198  | 1.072 | 1.136 |
| 0.288  | 0.612 | 0.783  | 0.903  | 0.895 | 0.963 |
| 0.239  | 0.575 | 0.917  | 0.964  | 0.989 | 1.026 |
| 0.381  | 0.553 | 0.768  | 0.897  | 0.858 | 0.889 |
| 0.32   | 0.564 | 0.844  | 0.943  | 0.925 | 1.042 |
| 1.174  | 0.895 | 0.748  | 0.671  | 0.692 | 0.809 |
| 1.111  | 0.83  | 0.784  | 0.717  | 0.697 | 0.766 |
| 1.204  | 0.834 | 0.765  | 0.684  | 0.703 | 0.791 |
| 1.233  | 0.885 | 0.775  | 0.702  | 0.712 | 0.79  |
| 0.624  | 0.628 | 0.639  | 0.617  | 0.607 | 0.627 |
| 0.621  | 0.663 | 0.669  | 0.62   | 0.61  | 0.636 |
| 0.68   | 0.625 | 0.604  | 0.6185 | 0.603 | 0.635 |
| 0.628  | 0.663 | 0.619  | 0.6185 | 0.613 | 0.622 |
| 0.629  | 0.693 | 0.689  | 0.695  | 0.631 | 0.777 |
| 0.6597 | 0.698 | 0.767  | 0.739  | 0.715 | 0.752 |

|       |       |       |       |       |       |
|-------|-------|-------|-------|-------|-------|
| 0.678 | 0.706 | 0.711 | 0.725 | 0.666 | 0.757 |
| 0.672 | 0.751 | 0.767 | 0.739 | 0.718 | 0.769 |
| 0.563 | 0.65  | 0.631 | 0.596 | 0.529 | 0.579 |
| 0.488 | 0.68  | 0.59  | 0.523 | 0.605 | 0.634 |
| 0.648 | 0.614 | 0.601 | 0.497 | 0.481 | 0.523 |
| 0.471 | 0.601 | 0.584 | 0.529 | 0.515 | 0.613 |
| 0.955 | 0.86  | 0.781 | 0.83  | 0.738 | 0.838 |
| 0.941 | 0.866 | 0.918 | 0.875 | 0.795 | 0.864 |
| 0.92  | 0.927 | 0.822 | 0.885 | 0.795 | 0.843 |
| 0.957 | 0.997 | 0.95  | 0.875 | 0.783 | 0.907 |
| 0.188 | 0.224 | 0.214 | 0.22  | 0.203 | 0.256 |
| 0.188 | 0.225 | 0.251 | 0.24  | 0.234 | 0.257 |
| 0.216 | 0.22  | 0.197 | 0.226 | 0.225 | 0.243 |
| 0.204 | 0.235 | 0.237 | 0.225 | 0.229 | 0.248 |
| 0.578 | 0.299 | 0.207 | 0.221 | 0.209 | 0.232 |
| 0.534 | 0.292 | 0.229 | 0.237 | 0.23  | 0.246 |
| 0.594 | 0.295 | 0.208 | 0.221 | 0.216 | 0.233 |
| 0.569 | 0.313 | 0.227 | 0.23  | 0.226 | 0.234 |
| 0.707 | 0.581 | 0.408 | 0.402 | 0.434 | 0.46  |
| 0.638 | 0.56  | 0.455 | 0.439 | 0.465 | 0.474 |
| 0.736 | 0.554 | 0.402 | 0.399 | 0.434 | 0.435 |
| 0.71  | 0.58  | 0.431 | 0.408 | 0.447 | 0.462 |
| 0.643 | 0.331 | 0.42  | 0.275 | 0.303 | 0.252 |
| 0.609 | 0.611 | 0.367 | 0.293 | 0.315 | 0.273 |
| 0.312 | 0.332 | 0.415 | 0.269 | 0.315 | 0.274 |
| 0.348 | 0.633 | 0.419 | 0.302 | 0.325 | 0.275 |
| 0.461 | 0.467 | 0.463 | 0.456 | 0.428 | 0.467 |
| 0.492 | 0.465 | 0.491 | 0.49  | 0.427 | 0.473 |
| 0.496 | 0.466 | 0.473 | 0.478 | 0.439 | 0.475 |
| 0.489 | 0.482 | 0.488 | 0.477 | 0.447 | 0.487 |
| 0.614 | 0.578 | 0.564 | 0.567 | 0.565 | 0.549 |
| 0.613 | 0.565 | 0.581 | 0.579 | 0.556 | 0.547 |
| 0.601 | 0.588 | 0.576 | 0.584 | 0.579 | 0.548 |
| 0.628 | 0.59  | 0.575 | 0.565 | 0.571 | 0.552 |
| 0.976 | 0.901 | 0.714 | 0.664 | 0.708 | 0.739 |
| 0.947 | 0.942 | 0.685 | 0.758 | 0.765 | 0.82  |
| 0.984 | 0.772 | 0.787 | 0.762 | 0.763 | 0.783 |
| 0.801 | 0.83  | 0.849 | 0.77  | 0.816 | 0.768 |
| 1.023 | 0.702 | 0.647 | 0.586 | 0.633 | 0.634 |

|       |        |        |       |       |       |
|-------|--------|--------|-------|-------|-------|
| 0.905 | 0.698  | 0.656  | 0.653 | 0.628 | 0.642 |
| 0.978 | 0.702  | 0.617  | 0.61  | 0.618 | 0.622 |
| 0.914 | 0.713  | 0.626  | 0.625 | 0.618 | 0.613 |
| 0.058 | 0.063  | 0.049  | 0.053 | 0.049 | 0.055 |
| 0.048 | 0.059  | 0.0567 | 0.065 | 0.044 | 0.074 |
| 0.082 | 0.059  | 0.052  | 0.045 | 0.049 | 0.059 |
| 0.067 | 0.08   | 0.069  | 0.059 | 0.062 | 0.077 |
| 0.308 | 0.285  | 0.29   | 0.269 | 0.271 | 0.295 |
| 0.277 | 0.276  | 0.284  | 0.272 | 0.271 | 0.296 |
| 0.303 | 0.28   | 0.268  | 0.261 | 0.264 | 0.283 |
| 0.292 | 0.271  | 0.278  | 0.265 | 0.269 | 0.284 |
| 0.484 | 0.473  | 0.433  | 0.403 | 0.39  | 0.4   |
| 0.475 | 0.459  | 0.427  | 0.402 | 0.378 | 0.406 |
| 0.485 | 0.472  | 0.413  | 0.394 | 0.386 | 0.394 |
| 0.46  | 0.469  | 0.429  | 0.427 | 0.387 | 0.403 |
| 0.38  | 0.407  | 0.402  | 0.421 | 0.407 | 0.416 |
| 0.368 | 0.418  | 0.426  | 0.426 | 0.397 | 0.4   |
| 0.415 | 0.41   | 0.39   | 0.415 | 0.389 | 0.394 |
| 0.402 | 0.406  | 0.41   | 0.427 | 0.396 | 0.4   |
| 0.666 | 0.726  | 0.677  | 0.735 | 0.757 | 0.773 |
| 0.67  | 0.734  | 0.691  | 0.735 | 0.749 | 0.755 |
| 0.729 | 0.751  | 0.681  | 0.745 | 0.731 | 0.75  |
| 0.684 | 0.77   | 0.688  | 0.764 | 0.759 | 0.742 |
| 0.863 | 0.8147 | 0.811  | 0.791 | 0.738 | 0.786 |
| 0.734 | 0.794  | 0.844  | 0.806 | 0.627 | 0.685 |
| 0.896 | 0.83   | 0.728  | 0.692 | 0.662 | 0.668 |
| 0.843 | 0.82   | 0.782  | 0.765 | 0.57  | 0.668 |
| 0.724 | 0.725  | 0.637  | 0.687 | 0.659 | 0.661 |
| 0.652 | 0.656  | 0.677  | 0.693 | 0.567 | 0.623 |
| 0.744 | 0.708  | 0.59   | 0.635 | 0.596 | 0.597 |
| 0.698 | 0.698  | 0.653  | 0.698 | 0.566 | 0.567 |
| 0.831 | 1.258  | 1.203  | 1.28  | 1.136 | 1.192 |
| 0.715 | 1.063  | 1.315  | 1.349 | 0.875 | 1.101 |
| 0.947 | 1.171  | 1.162  | 1.195 | 1.026 | 1.084 |
| 0.794 | 1.138  | 1.234  | 1.246 | 0.836 | 1.007 |
| 0.379 | 0.683  | 0.888  | 0.975 | 0.968 | 0.927 |

|       |       |        |        |       |       |
|-------|-------|--------|--------|-------|-------|
| 0.351 | 0.605 | 0.937  | 1.013  | 0.867 | 0.905 |
| 0.471 | 0.645 | 0.816  | 0.912  | 0.899 | 0.851 |
| 0.379 | 0.629 | 0.927  | 1.008  | 0.862 | 0.804 |
| 1.072 | 0.886 | 0.691  | 0.685  | 0.661 | 0.721 |
| 0.995 | 0.807 | 0.724  | 0.693  | 0.598 | 0.697 |
| 1.117 | 0.857 | 0.696  | 0.682  | 0.649 | 0.699 |
| 1.047 | 0.833 | 0.712  | 0.683  | 0.636 | 0.719 |
| 0.663 | 0.63  | 0.647  | 0.651  | 0.639 | 0.621 |
| 0.601 | 0.624 | 0.641  | 0.652  | 0.627 | 0.643 |
| 0.665 | 0.629 | 0.614  | 0.657  | 0.635 | 0.631 |
| 0.637 | 0.627 | 0.649  | 0.653  | 0.646 | 0.631 |
| 0.623 | 0.738 | 0.726  | 0.711  | 0.703 | 0.779 |
| 0.614 | 0.705 | 0.731  | 0.724  | 0.646 | 0.725 |
| 0.681 | 0.733 | 0.7307 | 0.71   | 0.69  | 0.738 |
| 0.672 | 0.755 | 0.735  | 0.759  | 0.677 | 0.738 |
| 0.577 | 0.573 | 0.559  | 0.595  | 0.521 | 0.597 |
| 0.544 | 0.573 | 0.607  | 0.614  | 0.495 | 0.572 |
| 0.588 | 0.582 | 0.542  | 0.605  | 0.632 | 0.575 |
| 0.584 | 0.595 | 0.613  | 0.671  | 0.519 | 0.584 |
| 0.743 | 0.744 | 0.695  | 0.713  | 0.692 | 0.744 |
| 0.762 | 0.714 | 0.725  | 0.724  | 0.641 | 0.725 |
| 0.744 | 0.756 | 0.69   | 0.739  | 0.692 | 0.795 |
| 0.734 | 0.816 | 0.775  | 0.7253 | 0.7   | 0.743 |
| 0.207 | 0.244 | 0.237  | 0.247  | 0.241 | 0.248 |
| 0.197 | 0.238 | 0.251  | 0.253  | 0.213 | 0.237 |
| 0.233 | 0.223 | 0.2443 | 0.247  | 0.216 | 0.231 |
| 0.225 | 0.247 | 0.245  | 0.256  | 0.222 | 0.226 |
| 0.667 | 0.357 | 0.228  | 0.215  | 0.213 | 0.253 |
| 0.58  | 0.323 | 0.23   | 0.218  | 0.198 | 0.262 |
| 0.66  | 0.348 | 0.214  | 0.213  | 0.206 | 0.247 |
| 0.628 | 0.359 | 0.24   | 0.224  | 0.209 | 0.236 |
| 0.84  | 0.686 | 0.468  | 0.487  | 0.485 | 0.54  |
| 0.776 | 0.62  | 0.478  | 0.511  | 0.458 | 0.541 |
| 0.897 | 0.646 | 0.431  | 0.474  | 0.467 | 0.509 |
| 0.807 | 0.665 | 0.482  | 0.493  | 0.462 | 0.505 |
| 0.627 | 0.319 | 0.409  | 0.279  | 0.286 | 0.26  |
| 0.591 | 0.629 | 0.36   | 0.275  | 0.29  | 0.232 |
| 0.312 | 0.271 | 0.468  | 0.273  | 0.298 | 0.271 |
| 0.303 | 0.529 | 0.422  | 0.273  | 0.312 | 0.249 |

|        |       |        |       |       |       |
|--------|-------|--------|-------|-------|-------|
| 0.4265 | 0.435 | 0.436  | 0.404 | 0.416 | 0.428 |
| 0.433  | 0.422 | 0.449  | 0.42  | 0.39  | 0.42  |
| 0.4265 | 0.428 | 0.418  | 0.401 | 0.402 | 0.41  |
| 0.42   | 0.424 | 0.444  | 0.404 | 0.39  | 0.412 |
| 0.547  | 0.561 | 0.554  | 0.578 | 0.583 | 0.565 |
| 0.553  | 0.557 | 0.558  | 0.59  | 0.545 | 0.566 |
| 0.567  | 0.547 | 0.548  | 0.579 | 0.559 | 0.556 |
| 0.535  | 0.543 | 0.537  | 0.574 | 0.57  | 0.562 |
| 0.814  | 0.866 | 0.681  | 0.627 | 0.618 | 0.701 |
| 0.745  | 0.858 | 0.728  | 0.651 | 0.601 | 0.674 |
| 0.833  | 0.876 | 0.666  | 0.653 | 0.608 | 0.667 |
| 0.802  | 0.933 | 0.756  | 0.665 | 0.627 | 0.667 |
| 0.789  | 0.726 | 0.694  | 0.656 | 0.665 | 0.66  |
| 0.788  | 0.706 | 0.704  | 0.648 | 0.626 | 0.65  |
| 0.92   | 0.727 | 0.679  | 0.629 | 0.601 | 0.591 |
| 0.879  | 0.7   | 0.694  | 0.634 | 0.573 | 0.571 |
| 0.107  | 0.124 | 0.071  | 0.07  | 0.071 | 0.093 |
| 0.09   | 0.08  | 0.096  | 0.083 | 0.039 | 0.087 |
| 0.138  | 0.116 | 0.062  | 0.069 | 0.056 | 0.071 |
| 0.109  | 0.114 | 0.096  | 0.079 | 0.042 | 0.077 |
| 0.326  | 0.31  | 0.304  | 0.308 | 0.327 | 0.314 |
| 0.3    | 0.3   | 0.278  | 0.296 | 0.278 | 0.287 |
| 0.331  | 0.297 | 0.32   | 0.315 | 0.317 | 0.316 |
| 0.325  | 0.3   | 0.289  | 0.306 | 0.317 | 0.307 |
| 0.53   | 0.51  | 0.508  | 0.502 | 0.522 | 0.544 |
| 0.528  | 0.5   | 0.5087 | 0.501 | 0.466 | 0.499 |
| 0.513  | 0.498 | 0.516  | 0.532 | 0.529 | 0.543 |
| 0.514  | 0.506 | 0.502  | 0.489 | 0.519 | 0.536 |
| 0.432  | 0.414 | 0.419  | 0.443 | 0.431 | 0.42  |
| 0.429  | 0.408 | 0.381  | 0.445 | 0.397 | 0.418 |
| 0.436  | 0.429 | 0.418  | 0.461 | 0.437 | 0.454 |
| 0.448  | 0.448 | 0.438  | 0.47  | 0.461 | 0.454 |
| 0.708  | 0.744 | 0.734  | 0.717 | 0.705 | 0.775 |
| 0.629  | 0.655 | 0.613  | 0.657 | 0.577 | 0.752 |
| 0.673  | 0.701 | 0.705  | 0.772 | 0.634 | 0.742 |
| 0.691  | 0.73  | 0.712  | 0.726 | 0.711 | 0.752 |

|       |        |       |       |       |       |
|-------|--------|-------|-------|-------|-------|
| 0.919 | 0.97   | 0.846 | 0.837 | 0.848 | 0.747 |
| 0.884 | 0.887  | 0.795 | 0.776 | 0.579 | 0.686 |
| 0.797 | 0.938  | 0.822 | 0.78  | 0.673 | 0.757 |
| 0.807 | 0.768  | 0.821 | 0.694 | 0.63  | 0.782 |
| 0.787 | 0.823  | 0.722 | 0.832 | 0.769 | 0.761 |
| 0.799 | 0.721  | 0.62  | 0.798 | 0.565 | 0.697 |
| 0.839 | 0.857  | 0.839 | 1.013 | 0.836 | 0.977 |
| 0.626 | 0.685  | 0.879 | 0.863 | 0.637 | 0.625 |
| 0.698 | 1.184  | 1.189 | 1.259 | 1.324 | 0.967 |
| 0.867 | 1.162  | 1.129 | 1.227 | 0.966 | 1.014 |
| 0.695 | 1.294  | 1.212 | 1.241 | 1.131 | 1.156 |
| 0.807 | 1.143  | 1.143 | 1.052 | 0.962 | 1.051 |
| 0.325 | 0.62   | 0.864 | 1.01  | 0.972 | 0.973 |
| 0.396 | 0.585  | 0.763 | 0.916 | 0.795 | 0.931 |
| 0.271 | 0.593  | 0.87  | 0.935 | 0.843 | 0.963 |
| 0.377 | 0.614  | 0.853 | 0.866 | 0.871 | 0.887 |
| 0.889 | 0.873  | 0.747 | 0.712 | 0.783 | 0.731 |
| 0.904 | 0.811  | 0.724 | 0.644 | 0.631 | 0.676 |
| 1.167 | 0.852  | 0.813 | 0.759 | 0.761 | 0.808 |
| 1.062 | 0.845  | 0.75  | 0.661 | 0.684 | 0.76  |
| 0.747 | 0.733  | 0.743 | 0.765 | 0.742 | 0.749 |
| 0.739 | 0.7307 | 0.722 | 0.729 | 0.668 | 0.762 |
| 0.723 | 0.726  | 0.752 | 0.699 | 0.738 | 0.743 |
| 0.759 | 0.733  | 0.723 | 0.703 | 0.738 | 0.742 |
| 0.792 | 0.751  | 0.745 | 0.763 | 0.787 | 0.787 |
| 0.714 | 0.684  | 0.681 | 0.748 | 0.618 | 0.75  |
| 0.704 | 0.687  | 0.7   | 0.694 | 0.657 | 0.702 |
| 0.668 | 0.702  | 0.713 | 0.669 | 0.673 | 0.704 |
| 0.512 | 0.469  | 0.477 | 0.505 | 0.489 | 0.524 |
| 0.477 | 0.449  | 0.511 | 0.428 | 0.405 | 0.458 |
| 0.56  | 0.498  | 0.557 | 0.567 | 0.52  | 0.564 |
| 0.537 | 0.546  | 0.486 | 0.469 | 0.532 | 0.456 |
| 0.947 | 0.927  | 0.895 | 0.881 | 0.912 | 0.781 |
| 0.89  | 0.854  | 0.775 | 0.85  | 0.743 | 0.893 |
| 0.847 | 0.825  | 0.842 | 0.917 | 0.825 | 0.951 |
| 0.879 | 0.878  | 0.926 | 0.832 | 0.884 | 0.91  |
| 0.237 | 0.275  | 0.281 | 0.292 | 0.268 | 0.3   |
| 0.228 | 0.259  | 0.253 | 0.285 | 0.226 | 0.282 |
| 0.233 | 0.266  | 0.277 | 0.3   | 0.256 | 0.288 |
| 0.238 | 0.256  | 0.286 | 0.294 | 0.255 | 0.264 |

|       |       |        |        |        |       |
|-------|-------|--------|--------|--------|-------|
| 0.891 | 0.338 | 0.262  | 0.256  | 0.276  | 0.315 |
| 0.781 | 0.392 | 0.249  | 0.237  | 0.229  | 0.295 |
| 0.76  | 0.408 | 0.288  | 0.262  | 0.265  | 0.33  |
| 0.762 | 0.439 | 0.29   | 0.251  | 0.288  | 0.33  |
| 1.089 | 0.795 | 0.582  | 0.579  | 0.62   | 0.52  |
| 1.101 | 0.718 | 0.56   | 0.54   | 0.517  | 0.627 |
| 1.046 | 0.808 | 0.612  | 0.582  | 0.593  | 0.705 |
| 1.038 | 0.845 | 0.622  | 0.566  | 0.617  | 0.667 |
| 0.576 | 0.644 | 0.421  | 0.308  | 0.3    | 0.27  |
| 0.568 | 0.703 | 0.44   | 0.335  | 0.353  | 0.288 |
| 0.738 | 0.832 | 0.137  | 0.377  | 0.401  | 0.342 |
| 0.649 | 0.679 | 0.41   | 0.403  | 0.334  | 0.322 |
| 0.484 | 0.506 | 0.521  | 0.523  | 0.507  | 0.473 |
| 0.489 | 0.468 | 0.475  | 0.522  | 0.423  | 0.451 |
| 0.493 | 0.493 | 0.502  | 0.522  | 0.476  | 0.5   |
| 0.475 | 0.485 | 0.479  | 0.498  | 0.474  | 0.448 |
| 0.643 | 0.63  | 0.627  | 0.631  | 0.626  | 0.656 |
| 0.634 | 0.611 | 0.599  | 0.589  | 0.571  | 0.639 |
| 0.647 | 0.624 | 0.6143 | 0.6113 | 0.618  | 0.657 |
| 0.646 | 0.633 | 0.617  | 0.614  | 0.608  | 0.655 |
| 1.071 | 1.049 | 0.962  | 0.937  | 0.966  | 0.812 |
| 1.126 | 1.145 | 0.862  | 0.798  | 0.714  | 0.907 |
| 1.223 | 1.219 | 0.99   | 0.995  | 0.892  | 0.992 |
| 1.109 | 1.193 | 0.969  | 0.89   | 0.896  | 0.988 |
| 0.96  | 0.85  | 0.785  | 0.734  | 0.81   | 0.755 |
| 1.01  | 0.829 | 0.771  | 0.739  | 0.757  | 0.748 |
| 1.006 | 0.909 | 0.813  | 0.788  | 0.831  | 0.846 |
| 0.994 | 0.909 | 0.821  | 0.777  | 0.809  | 0.816 |
| 0.094 | 0.114 | 0.105  | 0.079  | 0.09   | 0.119 |
| 0.112 | 0.131 | 0.09   | 0.082  | 0.059  | 0.135 |
| 0.084 | 0.107 | 0.093  | 0.076  | 0.081  | 0.107 |
| 0.093 | 0.119 | 0.093  | 0.069  | 0.081  | 0.108 |
| 0.314 | 0.294 | 0.292  | 0.297  | 0.299  | 0.301 |
| 0.307 | 0.3   | 0.288  | 0.292  | 0.293  | 0.304 |
| 0.302 | 0.297 | 0.277  | 0.279  | 0.2973 | 0.296 |
| 0.298 | 0.295 | 0.277  | 0.3    | 0.3    | 0.306 |

|        |        |        |       |       |        |
|--------|--------|--------|-------|-------|--------|
| 0.447  | 0.448  | 0.432  | 0.43  | 0.443 | 0.45   |
| 0.447  | 0.46   | 0.422  | 0.437 | 0.434 | 0.456  |
| 0.485  | 0.434  | 0.402  | 0.415 | 0.425 | 0.422  |
| 0.447  | 0.425  | 0.408  | 0.419 | 0.431 | 0.44   |
| 0.355  | 0.409  | 0.409  | 0.406 | 0.4   | 0.375  |
| 0.372  | 0.418  | 0.396  | 0.422 | 0.387 | 0.389  |
| 0.39   | 0.42   | 0.421  | 0.414 | 0.407 | 0.394  |
| 0.379  | 0.44   | 0.428  | 0.414 | 0.399 | 0.401  |
| 0.669  | 0.63   | 0.648  | 0.686 | 0.683 | 0.674  |
| 0.661  | 0.672  | 0.643  | 0.704 | 0.673 | 0.693  |
| 0.678  | 0.662  | 0.657  | 0.711 | 0.685 | 0.699  |
| 0.672  | 0.691  | 0.673  | 0.725 | 0.699 | 0.704  |
| 0.795  | 0.809  | 0.803  | 0.695 | 0.605 | 0.615  |
| 0.712  | 0.817  | 0.705  | 0.715 | 0.613 | 0.6097 |
| 0.872  | 0.687  | 0.797  | 0.617 | 0.588 | 0.609  |
| 0.723  | 0.778  | 0.745  | 0.716 | 0.589 | 0.605  |
| 0.572  | 0.5665 | 0.572  | 0.554 | 0.536 | 0.496  |
| 0.574  | 0.568  | 0.531  | 0.569 | 0.499 | 0.591  |
| 0.5777 | 0.5665 | 0.5567 | 0.528 | 0.511 | 0.54   |
| 0.587  | 0.565  | 0.567  | 0.588 | 0.513 | 0.54   |
| 0.613  | 0.961  | 1.04   | 0.976 | 0.864 | 0.821  |
| 0.525  | 0.982  | 0.981  | 0.98  | 0.866 | 0.867  |
| 0.686  | 0.834  | 1.059  | 0.867 | 0.84  | 0.844  |
| 0.556  | 0.891  | 0.951  | 0.912 | 0.817 | 0.81   |
| 0.431  | 0.566  | 0.83   | 0.928 | 0.942 | 0.966  |
| 0.426  | 0.608  | 0.8    | 0.921 | 0.959 | 1.012  |
| 0.338  | 0.621  | 0.945  | 0.941 | 1.054 | 1.069  |
| 0.369  | 0.661  | 0.994  | 1.017 | 1.039 | 1.083  |
| 1.139  | 0.828  | 0.756  | 0.701 | 0.674 | 0.739  |
| 1.054  | 0.863  | 0.735  | 0.72  | 0.664 | 0.78   |
| 1.173  | 0.746  | 0.696  | 0.633 | 0.621 | 0.701  |
| 0.994  | 0.752  | 0.707  | 0.674 | 0.641 | 0.701  |
| 0.678  | 0.624  | 0.66   | 0.59  | 0.666 | 0.656  |
| 0.654  | 0.663  | 0.671  | 0.629 | 0.66  | 0.671  |
| 0.664  | 0.632  | 0.638  | 0.584 | 0.628 | 0.639  |
| 0.666  | 0.642  | 0.653  | 0.588 | 0.638 | 0.635  |
| 0.664  | 0.676  | 0.667  | 0.612 | 0.662 | 0.695  |
| 0.648  | 0.726  | 0.621  | 0.639 | 0.674 | 0.752  |
| 0.714  | 0.703  | 0.683  | 0.604 | 0.658 | 0.699  |

|       |        |       |        |       |        |
|-------|--------|-------|--------|-------|--------|
| 0.67  | 0.731  | 0.66  | 0.695  | 0.708 | 0.729  |
| 0.614 | 0.591  | 0.604 | 0.583  | 0.576 | 0.609  |
| 0.577 | 0.5783 | 0.563 | 0.614  | 0.563 | 0.677  |
| 0.522 | 0.571  | 0.562 | 0.551  | 0.544 | 0.603  |
| 0.575 | 0.573  | 0.574 | 0.634  | 0.558 | 0.615  |
| 0.8   | 0.791  | 0.736 | 0.718  | 0.738 | 0.789  |
| 0.779 | 0.825  | 0.716 | 0.731  | 0.719 | 0.825  |
| 0.825 | 0.841  | 0.757 | 0.737  | 0.758 | 0.823  |
| 0.814 | 0.845  | 0.772 | 0.774  | 0.769 | 0.82   |
| 0.191 | 0.204  | 0.242 | 0.232  | 0.226 | 0.265  |
| 0.19  | 0.219  | 0.239 | 0.242  | 0.224 | 0.274  |
| 0.209 | 0.213  | 0.247 | 0.244  | 0.237 | 0.272  |
| 0.22  | 0.225  | 0.252 | 0.2393 | 0.258 | 0.292  |
| 0.527 | 0.344  | 0.241 | 0.225  | 0.237 | 0.277  |
| 0.681 | 0.367  | 0.232 | 0.225  | 0.228 | 0.286  |
| 0.581 | 0.342  | 0.249 | 0.227  | 0.238 | 0.293  |
| 0.575 | 0.352  | 0.242 | 0.244  | 0.255 | 0.304  |
| 1.048 | 0.694  | 0.545 | 0.507  | 0.557 | 0.613  |
| 1.019 | 0.715  | 0.51  | 0.522  | 0.531 | 0.663  |
| 0.921 | 0.717  | 0.548 | 0.501  | 0.546 | 0.637  |
| 0.847 | 0.719  | 0.548 | 0.546  | 0.569 | 0.67   |
| 0.509 | 0.336  | 0.407 | 0.33   | 0.272 | 0.278  |
| 0.544 | 0.608  | 0.422 | 0.293  | 0.293 | 0.272  |
| 0.321 | 0.368  | 0.392 | 0.349  | 0.288 | 0.263  |
| 0.342 | 0.607  | 0.414 | 0.289  | 0.318 | 0.261  |
| 0.475 | 0.443  | 0.458 | 0.487  | 0.449 | 0.439  |
| 0.456 | 0.468  | 0.451 | 0.481  | 0.445 | 0.439  |
| 0.446 | 0.459  | 0.458 | 0.457  | 0.438 | 0.428  |
| 0.452 | 0.461  | 0.465 | 0.461  | 0.432 | 0.441  |
| 0.592 | 0.569  | 0.543 | 0.55   | 0.581 | 0.58   |
| 0.556 | 0.59   | 0.556 | 0.567  | 0.581 | 0.579  |
| 0.598 | 0.573  | 0.521 | 0.547  | 0.559 | 0.5767 |
| 0.59  | 0.579  | 0.541 | 0.545  | 0.574 | 0.571  |
| 0.864 | 0.887  | 0.691 | 0.622  | 0.611 | 0.674  |
| 0.786 | 0.966  | 0.681 | 0.667  | 0.614 | 0.752  |
| 0.96  | 0.826  | 0.667 | 0.617  | 0.58  | 0.694  |
| 0.8   | 0.835  | 0.667 | 0.683  | 0.633 | 0.724  |
| 0.643 | 0.668  | 0.596 | 0.673  | 0.68  | 0.68   |
| 0.64  | 0.674  | 0.617 | 0.69   | 0.673 | 0.68   |

|       |        |       |        |        |        |
|-------|--------|-------|--------|--------|--------|
| 0.769 | 0.663  | 0.631 | 0.677  | 0.693  | 0.694  |
| 0.721 | 0.643  | 0.641 | 0.708  | 0.669  | 0.666  |
| 0.059 | 0.057  | 0.054 | 0.045  | 0.045  | 0.067  |
| 0.069 | 0.076  | 0.044 | 0.049  | 0.042  | 0.09   |
| 0.075 | 0.081  | 0.064 | 0.056  | 0.056  | 0.09   |
| 0.075 | 0.093  | 0.064 | 0.072  | 0.067  | 0.11   |
| 0.282 | 0.293  | 0.297 | 0.284  | 0.296  | 0.271  |
| 0.286 | 0.2853 | 0.295 | 0.284  | 0.266  | 0.293  |
| 0.294 | 0.285  | 0.296 | 0.276  | 0.281  | 0.297  |
| 0.28  | 0.278  | 0.293 | 0.295  | 0.287  | 0.297  |
| 0.458 | 0.447  | 0.437 | 0.411  | 0.428  | 0.411  |
| 0.47  | 0.4427 | 0.434 | 0.418  | 0.417  | 0.403  |
| 0.465 | 0.439  | 0.442 | 0.421  | 0.428  | 0.412  |
| 0.436 | 0.442  | 0.438 | 0.423  | 0.418  | 0.422  |
| 0.403 | 0.405  | 0.432 | 0.404  | 0.4    | 0.426  |
| 0.387 | 0.379  | 0.424 | 0.401  | 0.374  | 0.4343 |
| 0.419 | 0.414  | 0.414 | 0.414  | 0.382  | 0.436  |
| 0.378 | 0.385  | 0.425 | 0.439  | 0.398  | 0.441  |
| 0.749 | 0.73   | 0.697 | 0.691  | 0.705  | 0.743  |
| 0.735 | 0.664  | 0.717 | 0.7003 | 0.661  | 0.705  |
| 0.736 | 0.727  | 0.706 | 0.694  | 0.694  | 0.735  |
| 0.68  | 0.671  | 0.71  | 0.716  | 0.703  | 0.749  |
| 0.847 | 0.983  | 0.889 | 0.868  | 0.747  | 0.837  |
| 0.698 | 0.572  | 0.761 | 0.702  | 0.587  | 0.647  |
| 0.835 | 0.762  | 0.761 | 0.678  | 0.562  | 0.664  |
| 0.54  | 0.542  | 0.698 | 0.705  | 0.48   | 0.663  |
| 0.558 | 0.589  | 0.59  | 0.571  | 0.499  | 0.541  |
| 0.586 | 0.488  | 0.531 | 0.502  | 0.556  | 0.49   |
| 0.565 | 0.516  | 0.522 | 0.513  | 0.5073 | 0.497  |
| 0.509 | 0.483  | 0.53  | 0.524  | 0.467  | 0.502  |
| 0.478 | 0.931  | 1.014 | 0.913  | 0.826  | 0.841  |
| 0.399 | 0.611  | 0.878 | 0.801  | 0.718  | 0.756  |
| 0.537 | 0.758  | 0.898 | 0.793  | 0.677  | 0.717  |
| 0.375 | 0.578  | 0.836 | 0.804  | 0.7403 | 0.693  |
| 0.284 | 0.565  | 0.878 | 0.893  | 0.925  | 0.908  |
| 0.245 | 0.466  | 0.847 | 0.842  | 0.837  | 0.919  |

|       |        |       |       |        |       |
|-------|--------|-------|-------|--------|-------|
| 0.255 | 0.496  | 0.821 | 0.852 | 0.84   | 0.855 |
| 0.259 | 0.435  | 0.819 | 0.865 | 0.763  | 0.878 |
| 1.023 | 0.777  | 0.671 | 0.63  | 0.603  | 0.696 |
| 0.999 | 0.62   | 0.626 | 0.602 | 0.577  | 0.664 |
| 0.974 | 0.765  | 0.666 | 0.614 | 0.601  | 0.686 |
| 0.782 | 0.644  | 0.637 | 0.614 | 0.566  | 0.691 |
| 0.623 | 0.623  | 0.642 | 0.62  | 0.609  | 0.648 |
| 0.608 | 0.6143 | 0.615 | 0.605 | 0.589  | 0.644 |
| 0.626 | 0.622  | 0.619 | 0.589 | 0.594  | 0.67  |
| 0.596 | 0.598  | 0.618 | 0.637 | 0.631  | 0.664 |
| 0.721 | 0.756  | 0.758 | 0.833 | 0.724  | 0.823 |
| 0.666 | 0.593  | 0.743 | 0.78  | 0.64   | 0.746 |
| 0.742 | 0.704  | 0.735 | 0.764 | 0.651  | 0.76  |
| 0.596 | 0.613  | 0.733 | 0.811 | 0.628  | 0.769 |
| 0.577 | 0.559  | 0.564 | 0.5   | 0.563  | 0.567 |
| 0.549 | 0.561  | 0.551 | 0.549 | 0.48   | 0.548 |
| 0.564 | 0.593  | 0.578 | 0.572 | 0.534  | 0.554 |
| 0.501 | 0.531  | 0.569 | 0.597 | 0.54   | 0.471 |
| 0.779 | 0.784  | 0.727 | 0.741 | 0.735  | 0.786 |
| 0.76  | 0.657  | 0.717 | 0.717 | 0.652  | 0.769 |
| 0.823 | 0.746  | 0.702 | 0.692 | 0.662  | 0.718 |
| 0.681 | 0.661  | 0.698 | 0.774 | 0.67   | 0.796 |
| 0.207 | 0.235  | 0.234 | 0.261 | 0.26   | 0.271 |
| 0.2   | 0.203  | 0.231 | 0.244 | 0.218  | 0.268 |
| 0.237 | 0.24   | 0.242 | 0.247 | 0.243  | 0.259 |
| 0.194 | 0.216  | 0.247 | 0.261 | 0.243  | 0.274 |
| 0.69  | 0.346  | 0.239 | 0.224 | 0.238  | 0.263 |
| 0.493 | 0.249  | 0.238 | 0.217 | 0.211  | 0.252 |
| 0.567 | 0.321  | 0.232 | 0.212 | 0.212  | 0.24  |
| 0.417 | 0.246  | 0.235 | 0.228 | 0.203  | 0.242 |
| 1.006 | 0.653  | 0.546 | 0.5   | 0.539  | 0.625 |
| 0.89  | 0.536  | 0.549 | 0.506 | 0.502  | 0.603 |
| 1.034 | 0.642  | 0.527 | 0.484 | 0.49   | 0.559 |
| 0.763 | 0.533  | 0.53  | 0.506 | 0.475  | 0.575 |
| 0.484 | 0.33   | 0.386 | 0.297 | 0.287  | 0.291 |
| 0.543 | 0.339  | 0.273 | 0.302 | 0.287  | 0.237 |
| 0.331 | 0.279  | 0.393 | 0.28  | 0.291  | 0.253 |
| 0.366 | 0.408  | 0.287 | 0.281 | 0.2883 | 0.248 |
| 0.398 | 0.426  | 0.437 | 0.42  | 0.431  | 0.45  |

|       |       |        |       |       |       |
|-------|-------|--------|-------|-------|-------|
| 0.396 | 0.395 | 0.445  | 0.422 | 0.429 | 0.456 |
| 0.397 | 0.429 | 0.447  | 0.433 | 0.449 | 0.46  |
| 0.36  | 0.422 | 0.459  | 0.441 | 0.439 | 0.472 |
| 0.557 | 0.566 | 0.575  | 0.569 | 0.527 | 0.575 |
| 0.57  | 0.566 | 0.568  | 0.567 | 0.499 | 0.581 |
| 0.564 | 0.58  | 0.576  | 0.542 | 0.511 | 0.582 |
| 0.525 | 0.552 | 0.581  | 0.574 | 0.543 | 0.601 |
| 0.855 | 0.877 | 0.657  | 0.635 | 0.666 | 0.699 |
| 0.834 | 0.728 | 0.692  | 0.675 | 0.6   | 0.724 |
| 0.846 | 0.914 | 0.721  | 0.686 | 0.67  | 0.764 |
| 0.663 | 0.786 | 0.72   | 0.756 | 0.671 | 0.805 |
| 0.732 | 0.683 | 0.615  | 0.649 | 0.615 | 0.643 |
| 0.629 | 0.599 | 0.591  | 0.634 | 0.589 | 0.633 |
| 0.748 | 0.685 | 0.589  | 0.627 | 0.585 | 0.633 |
| 0.646 | 0.635 | 0.59   | 0.651 | 0.558 | 0.632 |
| 0.081 | 0.095 | 0.066  | 0.062 | 0.059 | 0.089 |
| 0.066 | 0.062 | 0.069  | 0.054 | 0.042 | 0.093 |
| 0.089 | 0.079 | 0.055  | 0.053 | 0.046 | 0.083 |
| 0.04  | 0.051 | 0.068  | 0.065 | 0.047 | 0.09  |
| 0.32  | 0.305 | 0.284  | 0.282 | 0.276 | 0.296 |
| 0.305 | 0.263 | 0.293  | 0.29  | 0.245 | 0.301 |
| 0.279 | 0.301 | 0.29   | 0.292 | 0.277 | 0.304 |
| 0.28  | 0.289 | 0.289  | 0.3   | 0.263 | 0.306 |
| 0.51  | 0.455 | 0.443  | 0.425 | 0.422 | 0.433 |
| 0.513 | 0.39  | 0.447  | 0.438 | 0.398 | 0.435 |
| 0.447 | 0.445 | 0.437  | 0.447 | 0.418 | 0.434 |
| 0.451 | 0.415 | 0.392  | 0.447 | 0.399 | 0.434 |
| 0.389 | 0.384 | 0.368  | 0.39  | 0.429 | 0.388 |
| 0.367 | 0.339 | 0.374  | 0.388 | 0.404 | 0.389 |
| 0.355 | 0.387 | 0.373  | 0.405 | 0.379 | 0.403 |
| 0.343 | 0.339 | 0.312  | 0.42  | 0.404 | 0.409 |
| 0.671 | 0.708 | 0.67   | 0.681 | 0.731 | 0.7   |
| 0.72  | 0.582 | 0.692  | 0.674 | 0.702 | 0.711 |
| 0.617 | 0.702 | 0.673  | 0.713 | 0.718 | 0.685 |
| 0.604 | 0.63  | 0.6783 | 0.717 | 0.657 | 0.714 |
| 0.835 | 0.867 | 0.87   | 0.832 | 0.718 | 0.777 |

|       |        |        |       |        |        |
|-------|--------|--------|-------|--------|--------|
| 0.706 | 0.549  | 0.87   | 0.778 | 0.439  | 0.793  |
| 0.663 | 0.72   | 0.849  | 0.815 | 0.593  | 0.633  |
| 0.482 | 0.578  | 0.72   | 0.769 | 0.435  | 0.725  |
| 0.556 | 0.628  | 0.571  | 0.596 | 0.574  | 0.561  |
| 0.529 | 0.6007 | 0.62   | 0.602 | 0.511  | 0.575  |
| 0.595 | 0.587  | 0.58   | 0.646 | 0.65   | 0.496  |
| 0.493 | 0.587  | 0.562  | 0.619 | 0.525  | 0.539  |
| 0.45  | 0.786  | 0.747  | 0.72  | 0.662  | 0.575  |
| 0.431 | 0.46   | 0.769  | 0.709 | 0.459  | 0.619  |
| 0.45  | 0.658  | 0.713  | 0.689 | 0.554  | 0.515  |
| 0.33  | 0.648  | 0.635  | 0.667 | 0.421  | 0.593  |
| 0.351 | 0.524  | 0.702  | 0.764 | 0.787  | 0.712  |
| 0.318 | 0.429  | 0.736  | 0.76  | 0.656  | 0.799  |
| 0.307 | 0.505  | 0.699  | 0.75  | 0.747  | 0.769  |
| 0.284 | 0.555  | 0.702  | 0.782 | 0.678  | 0.848  |
| 1.13  | 0.772  | 0.658  | 0.648 | 0.637  | 0.67   |
| 1.022 | 0.587  | 0.658  | 0.633 | 0.6215 | 0.691  |
| 0.939 | 0.724  | 0.653  | 0.643 | 0.606  | 0.633  |
| 0.747 | 0.664  | 0.6563 | 0.644 | 0.6215 | 0.665  |
| 0.629 | 0.632  | 0.605  | 0.596 | 0.617  | 0.574  |
| 0.619 | 0.577  | 0.605  | 0.601 | 0.587  | 0.592  |
| 0.597 | 0.611  | 0.588  | 0.584 | 0.605  | 0.565  |
| 0.577 | 0.571  | 0.551  | 0.602 | 0.583  | 0.574  |
| 0.529 | 0.63   | 0.576  | 0.583 | 0.595  | 0.66   |
| 0.527 | 0.449  | 0.586  | 0.581 | 0.5523 | 0.66   |
| 0.469 | 0.556  | 0.548  | 0.583 | 0.563  | 0.608  |
| 0.432 | 0.507  | 0.57   | 0.58  | 0.499  | 0.633  |
| 0.721 | 0.601  | 0.64   | 0.644 | 0.625  | 0.648  |
| 0.608 | 0.552  | 0.651  | 0.669 | 0.594  | 0.649  |
| 0.683 | 0.577  | 0.611  | 0.689 | 0.579  | 0.651  |
| 0.585 | 0.608  | 0.573  | 0.706 | 0.534  | 0.653  |
| 0.715 | 0.684  | 0.626  | 0.698 | 0.651  | 0.675  |
| 0.778 | 0.533  | 0.649  | 0.678 | 0.6413 | 0.693  |
| 0.627 | 0.707  | 0.643  | 0.713 | 0.656  | 0.696  |
| 0.58  | 0.582  | 0.529  | 0.727 | 0.617  | 0.718  |
| 0.194 | 0.207  | 0.216  | 0.223 | 0.216  | 0.219  |
| 0.198 | 0.164  | 0.224  | 0.223 | 0.2097 | 0.226  |
| 0.178 | 0.2    | 0.21   | 0.245 | 0.213  | 0.2237 |
| 0.167 | 0.173  | 0.173  | 0.239 | 0.2    | 0.226  |

|       |       |       |       |       |       |
|-------|-------|-------|-------|-------|-------|
| 0.595 | 0.316 | 0.229 | 0.199 | 0.223 | 0.241 |
| 0.56  | 0.212 | 0.236 | 0.208 | 0.179 | 0.252 |
| 0.436 | 0.288 | 0.225 | 0.21  | 0.219 | 0.239 |
| 0.381 | 0.235 | 0.174 | 0.215 | 0.191 | 0.249 |
| 0.928 | 0.584 | 0.414 | 0.401 | 0.465 | 0.495 |
| 0.866 | 0.45  | 0.439 | 0.418 | 0.382 | 0.512 |
| 0.744 | 0.54  | 0.403 | 0.415 | 0.435 | 0.486 |
| 0.673 | 0.475 | 0.351 | 0.43  | 0.397 | 0.499 |
| 0.478 | 0.285 | 0.385 | 0.263 | 0.285 | 0.264 |
| 0.439 | 0.492 | 0.216 | 0.259 | 0.322 | 0.208 |
| 0.342 | 0.321 | 0.355 | 0.24  | 0.291 | 0.24  |
| 0.349 | 0.409 | 0.329 | 0.184 | 0.321 | 0.21  |
| 0.482 | 0.498 | 0.492 | 0.475 | 0.448 | 0.5   |
| 0.461 | 0.404 | 0.5   | 0.515 | 0.402 | 0.512 |
| 0.447 | 0.451 | 0.462 | 0.501 | 0.399 | 0.5   |
| 0.42  | 0.402 | 0.409 | 0.499 | 0.389 | 0.505 |
| 0.537 | 0.552 | 0.554 | 0.529 | 0.526 | 0.504 |
| 0.537 | 0.5   | 0.571 | 0.568 | 0.527 | 0.515 |
| 0.516 | 0.505 | 0.521 | 0.519 | 0.53  | 0.495 |
| 0.512 | 0.492 | 0.504 | 0.526 | 0.521 | 0.512 |
| 0.808 | 0.831 | 0.621 | 0.594 | 0.621 | 0.645 |
| 0.811 | 0.61  | 0.675 | 0.689 | 0.505 | 0.706 |
| 0.632 | 0.85  | 0.633 | 0.631 | 0.604 | 0.683 |
| 0.563 | 0.673 | 0.643 | 0.721 | 0.551 | 0.646 |
| 0.729 | 0.607 | 0.577 | 0.581 | 0.575 | 0.569 |
| 0.681 | 0.54  | 0.575 | 0.584 | 0.517 | 0.587 |
| 0.68  | 0.601 | 0.575 | 0.572 | 0.544 | 0.561 |
| 0.607 | 0.559 | 0.54  | 0.589 | 0.521 | 0.566 |
| 0.079 | 0.091 | 0.073 | 0.075 | 0.07  | 0.117 |
| 0.084 | 0.047 | 0.085 | 0.083 | 0.039 | 0.137 |
| 0.056 | 0.086 | 0.069 | 0.098 | 0.072 | 0.152 |
| 0.046 | 0.05  | 0.048 | 0.1   | 0.055 | 0.146 |
| 0.322 | 0.302 | 0.292 | 0.295 | 0.286 | 0.306 |
| 0.32  | 0.307 | 0.295 | 0.295 | 0.288 | 0.303 |
| 0.308 | 0.293 | 0.286 | 0.297 | 0.282 | 0.3   |
| 0.304 | 0.3   | 0.283 | 0.287 | 0.281 | 0.304 |

|       |        |       |       |       |       |
|-------|--------|-------|-------|-------|-------|
| 0.465 | 0.481  | 0.431 | 0.438 | 0.416 | 0.431 |
| 0.467 | 0.48   | 0.434 | 0.432 | 0.413 | 0.421 |
| 0.486 | 0.436  | 0.407 | 0.423 | 0.41  | 0.412 |
| 0.444 | 0.449  | 0.388 | 0.412 | 0.402 | 0.43  |
| 0.396 | 0.399  | 0.384 | 0.399 | 0.391 | 0.395 |
| 0.395 | 0.391  | 0.379 | 0.396 | 0.393 | 0.393 |
| 0.406 | 0.385  | 0.389 | 0.392 | 0.392 | 0.405 |
| 0.391 | 0.399  | 0.38  | 0.392 | 0.384 | 0.399 |
| 0.676 | 0.682  | 0.68  | 0.685 | 0.669 | 0.675 |
| 0.683 | 0.69   | 0.661 | 0.696 | 0.675 | 0.667 |
| 0.662 | 0.676  | 0.687 | 0.706 | 0.706 | 0.717 |
| 0.678 | 0.6827 | 0.669 | 0.706 | 0.689 | 0.694 |
| 0.763 | 0.716  | 0.651 | 0.702 | 0.595 | 0.664 |
| 0.66  | 0.674  | 0.624 | 0.698 | 0.559 | 0.67  |
| 0.744 | 0.627  | 0.673 | 0.665 | 0.565 | 0.584 |
| 0.642 | 0.655  | 0.609 | 0.662 | 0.571 | 0.557 |
| 0.651 | 0.629  | 0.617 | 0.529 | 0.601 | 0.657 |
| 0.612 | 0.636  | 0.603 | 0.514 | 0.565 | 0.64  |
| 0.649 | 0.569  | 0.533 | 0.547 | 0.573 | 0.549 |
| 0.6   | 0.625  | 0.582 | 0.504 | 0.576 | 0.57  |
| 0.467 | 0.733  | 0.739 | 0.772 | 0.645 | 0.578 |
| 0.419 | 0.734  | 0.769 | 0.728 | 0.62  | 0.551 |
| 0.49  | 0.615  | 0.764 | 0.789 | 0.648 | 0.444 |
| 0.426 | 0.664  | 0.672 | 0.69  | 0.673 | 0.533 |
| 0.311 | 0.5    | 0.663 | 0.778 | 0.755 | 0.582 |
| 0.38  | 0.507  | 0.683 | 0.753 | 0.713 | 0.564 |
| 0.298 | 0.473  | 0.717 | 0.804 | 0.808 | 0.566 |
| 0.29  | 0.484  | 0.647 | 0.749 | 0.813 | 0.683 |
| 0.927 | 0.735  | 0.64  | 0.617 | 0.609 | 0.617 |
| 0.867 | 0.704  | 0.637 | 0.623 | 0.587 | 0.626 |
| 0.882 | 0.626  | 0.634 | 0.624 | 0.586 | 0.585 |
| 0.798 | 0.681  | 0.604 | 0.617 | 0.604 | 0.577 |
| 0.67  | 0.638  | 0.64  | 0.673 | 0.668 | 0.66  |
| 0.649 | 0.647  | 0.654 | 0.666 | 0.668 | 0.655 |
| 0.685 | 0.621  | 0.619 | 0.632 | 0.633 | 0.626 |
| 0.639 | 0.611  | 0.61  | 0.636 | 0.638 | 0.622 |
| 0.603 | 0.619  | 0.631 | 0.664 | 0.64  | 0.713 |
| 0.611 | 0.627  | 0.609 | 0.631 | 0.609 | 0.699 |
| 0.619 | 0.612  | 0.653 | 0.642 | 0.611 | 0.668 |
| 0.611 | 0.612  | 0.612 | 0.648 | 0.644 | 0.671 |

|       |       |       |       |       |       |
|-------|-------|-------|-------|-------|-------|
| 0.745 | 0.679 | 0.71  | 0.762 | 0.715 | 0.762 |
| 0.644 | 0.712 | 0.74  | 0.723 | 0.694 | 0.819 |
| 0.787 | 0.644 | 0.71  | 0.675 | 0.651 | 0.75  |
| 0.701 | 0.66  | 0.689 | 0.722 | 0.682 | 0.722 |
| 0.788 | 0.705 | 0.627 | 0.672 | 0.634 | 0.678 |
| 0.783 | 0.717 | 0.611 | 0.661 | 0.624 | 0.68  |
| 0.787 | 0.687 | 0.671 | 0.696 | 0.654 | 0.691 |
| 0.755 | 0.709 | 0.638 | 0.694 | 0.666 | 0.686 |
| 0.198 | 0.223 | 0.221 | 0.242 | 0.222 | 0.241 |
| 0.191 | 0.225 | 0.219 | 0.235 | 0.217 | 0.234 |
| 0.209 | 0.212 | 0.226 | 0.24  | 0.215 | 0.24  |
| 0.197 | 0.224 | 0.215 | 0.236 | 0.217 | 0.233 |
| 0.467 | 0.253 | 0.202 | 0.207 | 0.205 | 0.216 |
| 0.502 | 0.244 | 0.196 | 0.201 | 0.201 | 0.221 |
| 0.445 | 0.263 | 0.224 | 0.214 | 0.208 | 0.212 |
| 0.447 | 0.261 | 0.207 | 0.214 | 0.213 | 0.222 |
| 0.957 | 0.584 | 0.458 | 0.496 | 0.466 | 0.539 |
| 0.902 | 0.582 | 0.441 | 0.484 | 0.443 | 0.541 |
| 0.953 | 0.583 | 0.479 | 0.491 | 0.441 | 0.51  |
| 0.9   | 0.567 | 0.425 | 0.488 | 0.458 | 0.536 |
| 0.46  | 0.34  | 0.364 | 0.296 | 0.298 | 0.265 |
| 0.433 | 0.48  | 0.365 | 0.303 | 0.286 | 0.255 |
| 0.38  | 0.291 | 0.33  | 0.295 | 0.268 | 0.232 |
| 0.345 | 0.434 | 0.357 | 0.29  | 0.258 | 0.244 |
| 0.459 | 0.462 | 0.478 | 0.465 | 0.458 | 0.522 |
| 0.458 | 0.472 | 0.49  | 0.467 | 0.447 | 0.525 |
| 0.467 | 0.439 | 0.469 | 0.487 | 0.468 | 0.546 |
| 0.44  | 0.447 | 0.461 | 0.48  | 0.464 | 0.547 |
| 0.572 | 0.57  | 0.549 | 0.636 | 0.581 | 0.6   |
| 0.566 | 0.569 | 0.592 | 0.64  | 0.584 | 0.6   |
| 0.62  | 0.549 | 0.558 | 0.58  | 0.564 | 0.581 |
| 0.604 | 0.581 | 0.531 | 0.608 | 0.563 | 0.583 |
| 0.894 | 0.805 | 0.652 | 0.651 | 0.672 | 0.656 |
| 0.767 | 0.847 | 0.652 | 0.628 | 0.661 | 0.678 |
| 0.906 | 0.757 | 0.62  | 0.615 | 0.611 | 0.618 |
| 0.76  | 0.758 | 0.58  | 0.617 | 0.655 | 0.658 |
| 0.637 | 0.57  | 0.572 | 0.583 | 0.574 | 0.563 |
| 0.624 | 0.566 | 0.557 | 0.573 | 0.563 | 0.56  |
| 0.64  | 0.558 | 0.577 | 0.571 | 0.571 | 0.552 |

|       |       |       |       |       |        |
|-------|-------|-------|-------|-------|--------|
| 0.608 | 0.557 | 0.58  | 0.574 | 0.551 | 0.542  |
| 0.089 | 0.096 | 0.076 | 0.072 | 0.067 | 0.081  |
| 0.097 | 0.095 | 0.067 | 0.062 | 0.066 | 0.086  |
| 0.1   | 0.085 | 0.083 | 0.085 | 0.082 | 0.089  |
| 0.091 | 0.1   | 0.078 | 0.081 | 0.075 | 0.095  |
|       |       |       |       |       |        |
| 0.294 | 0.288 | 0.292 | 0.305 | 0.281 | 0.283  |
| 0.301 | 0.288 | 0.285 | 0.325 | 0.275 | 0.304  |
| 0.287 | 0.314 | 0.274 | 0.302 | 0.275 | 0.325  |
| 0.368 | 0.346 | 0.313 | 0.345 | 0.334 | 0.354  |
|       |       |       |       |       |        |
| 0.565 | 0.561 | 0.516 | 0.525 | 0.544 | 0.495  |
| 0.614 | 0.565 | 0.553 | 0.572 | 0.576 | 0.539  |
| 0.534 | 0.535 | 0.5   | 0.528 | 0.54  | 0.494  |
| 0.619 | 0.575 | 0.533 | 0.551 | 0.532 | 0.535  |
|       |       |       |       |       |        |
| 0.456 | 0.46  | 0.438 | 0.449 | 0.422 | 0.452  |
| 0.433 | 0.409 | 0.392 | 0.428 | 0.418 | 0.433  |
| 0.415 | 0.427 | 0.411 | 0.42  | 0.387 | 0.43   |
| 0.483 | 0.443 | 0.422 | 0.472 | 0.446 | 0.45   |
|       |       |       |       |       |        |
| 0.792 | 0.748 | 0.648 | 0.722 | 0.757 | 0.728  |
| 0.689 | 0.614 | 0.606 | 0.637 | 0.666 | 0.697  |
| 0.722 | 0.744 | 0.649 | 0.685 | 0.696 | 0.83   |
| 0.829 | 0.74  | 0.733 | 0.774 | 0.802 | 0.793  |
|       |       |       |       |       |        |
| 0.719 | 0.91  | 0.809 | 0.825 | 0.733 | 0.732  |
| 0.743 | 0.698 | 0.637 | 0.674 | 0.704 | 0.7147 |
| 0.751 | 0.735 | 0.908 | 0.74  | 0.677 | 0.686  |
| 0.669 | 0.689 | 0.785 | 0.912 | 0.776 | 0.726  |
|       |       |       |       |       |        |
| 0.535 | 0.629 | 0.73  | 0.591 | 0.602 | 0.564  |
| 0.666 | 0.647 | 0.664 | 0.546 | 0.674 | 0.66   |
| 0.741 | 0.691 | 0.825 | 0.722 | 0.795 | 0.761  |
| 0.778 | 0.754 | 0.811 | 0.794 | 0.791 | 0.81   |
|       |       |       |       |       |        |
| 0.368 | 0.805 | 0.781 | 0.722 | 0.756 | 0.524  |
| 0.362 | 0.596 | 0.642 | 0.654 | 0.518 | 0.429  |
| 0.32  | 0.557 | 0.648 | 0.643 | 0.462 | 0.501  |
| 0.418 | 0.612 | 0.653 | 0.6   | 0.58  | 0.508  |
|       |       |       |       |       |        |
| 0.207 | 0.432 | 0.617 | 0.715 | 0.699 | 0.604  |
| 0.178 | 0.305 | 0.469 | 0.599 | 0.481 | 0.472  |
| 0.165 | 0.307 | 0.49  | 0.604 | 0.47  | 0.541  |

|        |       |       |       |        |        |
|--------|-------|-------|-------|--------|--------|
| 0.13   | 0.282 | 0.519 | 0.547 | 0.484  | 0.412  |
| 0.865  | 0.747 | 0.671 | 0.655 | 0.611  | 0.62   |
| 0.972  | 0.733 | 0.675 | 0.684 | 0.664  | 0.675  |
| 0.8    | 0.667 | 0.621 | 0.637 | 0.6423 | 0.639  |
| 0.976  | 0.794 | 0.644 | 0.652 | 0.652  | 0.717  |
| 0.735  | 0.752 | 0.74  | 0.766 | 0.763  | 0.744  |
| 0.763  | 0.763 | 0.784 | 0.8   | 0.758  | 0.794  |
| 0.7533 | 0.674 | 0.663 | 0.692 | 0.7653 | 0.762  |
| 0.762  | 0.732 | 0.711 | 0.752 | 0.775  | 0.77   |
| 0.718  | 0.76  | 0.774 | 0.766 | 0.787  | 0.807  |
| 0.7    | 0.658 | 0.724 | 0.783 | 0.717  | 0.734  |
| 0.669  | 0.724 | 0.842 | 0.89  | 0.749  | 0.851  |
| 0.756  | 0.757 | 0.813 | 0.879 | 0.816  | 0.858  |
| 0.661  | 0.594 | 0.565 | 0.605 | 0.64   | 0.6585 |
| 0.738  | 0.68  | 0.676 | 0.672 | 0.67   | 0.664  |
| 0.525  | 0.659 | 0.553 | 0.669 | 0.629  | 0.653  |
| 0.819  | 0.839 | 0.677 | 0.589 | 0.701  | 0.6585 |
| 0.987  | 1.078 | 0.924 | 0.876 | 0.871  | 0.903  |
| 0.88   | 0.876 | 0.816 | 0.821 | 0.782  | 0.903  |
| 0.834  | 0.925 | 0.889 | 0.863 | 0.757  | 0.924  |
| 0.996  | 0.999 | 0.837 | 0.841 | 0.865  | 1.017  |
| 0.243  | 0.276 | 0.255 | 0.254 | 0.283  | 0.277  |
| 0.212  | 0.21  | 0.236 | 0.251 | 0.243  | 0.258  |
| 0.208  | 0.228 | 0.248 | 0.27  | 0.246  | 0.303  |
| 0.235  | 0.241 | 0.239 | 0.261 | 0.268  | 0.293  |
| 0.582  | 0.397 | 0.269 | 0.257 | 0.263  | 0.28   |
| 0.631  | 0.322 | 0.239 | 0.237 | 0.237  | 0.254  |
| 0.544  | 0.317 | 0.255 | 0.256 | 0.236  | 0.278  |
| 0.696  | 0.367 | 0.274 | 0.277 | 0.296  | 0.31   |
| 0.942  | 0.843 | 0.561 | 0.55  | 0.556  | 0.61   |
| 0.899  | 0.698 | 0.522 | 0.528 | 0.527  | 0.542  |
| 0.866  | 0.646 | 0.507 | 0.505 | 0.465  | 0.552  |
| 1.146  | 0.72  | 0.507 | 0.56  | 0.581  | 0.609  |
| 0.394  | 0.688 | 0.31  | 0.279 | 0.277  | 0.255  |
| 0.646  | 0.697 | 0.416 | 0.292 | 0.294  | 0.307  |
| 0.778  | 0.76  | 0.334 | 0.388 | 0.407  | 0.371  |
| 0.929  | 0.992 | 0.422 | 0.311 | 0.415  | 0.391  |
| 0.453  | 0.462 | 0.465 | 0.48  | 0.499  | 0.471  |
| 0.516  | 0.488 | 0.488 | 0.499 | 0.506  | 0.503  |

|        |        |       |       |       |        |
|--------|--------|-------|-------|-------|--------|
| 0.427  | 0.445  | 0.425 | 0.455 | 0.464 | 0.476  |
| 0.486  | 0.512  | 0.459 | 0.466 | 0.507 | 0.543  |
| 0.631  | 0.638  | 0.609 | 0.615 | 0.6   | 0.625  |
| 0.656  | 0.659  | 0.641 | 0.65  | 0.631 | 0.656  |
| 0.698  | 0.71   | 0.7   | 0.718 | 0.692 | 0.73   |
| 0.746  | 0.721  | 0.715 | 0.714 | 0.711 | 0.727  |
| 1.283  | 1.269  | 0.949 | 0.831 | 0.829 | 0.927  |
| 1.351  | 1.242  | 0.982 | 0.935 | 0.903 | 1      |
| 1.111  | 1.11   | 0.923 | 0.823 | 0.775 | 0.884  |
| 1.306  | 1.196  | 0.918 | 0.844 | 0.859 | 0.959  |
| 0.843  | 0.816  | 0.714 | 0.763 | 0.737 | 0.706  |
| 0.833  | 0.797  | 0.722 | 0.763 | 0.722 | 0.693  |
| 0.82   | 0.851  | 0.689 | 0.739 | 0.703 | 0.774  |
| 0.962  | 0.856  | 0.812 | 0.875 | 0.844 | 0.787  |
| 0.1    | 0.085  | 0.098 | 0.099 | 0.093 | 0.1    |
| 0.083  | 0.087  | 0.08  | 0.064 | 0.076 | 0.074  |
| 0.073  | 0.085  | 0.07  | 0.063 | 0.064 | 0.082  |
| 0.092  | 0.083  | 0.071 | 0.068 | 0.083 | 0.077  |
| 0.337  | 0.33   | 0.301 | 0.35  | 0.331 | 0.331  |
| 0.322  | 0.325  | 0.283 | 0.354 | 0.313 | 0.326  |
| 0.31   | 0.305  | 0.312 | 0.345 | 0.303 | 0.329  |
| 0.327  | 0.292  | 0.288 | 0.332 | 0.315 | 0.291  |
| 0.587  | 0.608  | 0.538 | 0.56  | 0.551 | 0.561  |
| 0.643  | 0.629  | 0.53  | 0.593 | 0.57  | 0.565  |
| 0.587  | 0.606  | 0.545 | 0.612 | 0.561 | 0.5563 |
| 0.581  | 0.533  | 0.515 | 0.542 | 0.525 | 0.543  |
| 0.434  | 0.446  | 0.439 | 0.417 | 0.42  | 0.447  |
| 0.432  | 0.445  | 0.377 | 0.405 | 0.386 | 0.428  |
| 0.4303 | 0.457  | 0.413 | 0.38  | 0.367 | 0.389  |
| 0.425  | 0.436  | 0.399 | 0.398 | 0.406 | 0.42   |
| 0.621  | 0.6663 | 0.713 | 0.678 | 0.775 | 0.755  |
| 0.644  | 0.672  | 0.634 | 0.68  | 0.672 | 0.739  |
| 0.572  | 0.656  | 0.599 | 0.635 | 0.651 | 0.666  |
| 0.648  | 0.671  | 0.588 | 0.671 | 0.687 | 0.723  |
| 0.913  | 0.977  | 0.858 | 0.91  | 0.856 | 0.793  |
| 0.795  | 0.858  | 0.661 | 0.778 | 0.655 | 0.689  |

|        |        |        |        |       |       |
|--------|--------|--------|--------|-------|-------|
| 0.746  | 0.756  | 0.701  | 0.677  | 0.619 | 0.685 |
| 0.744  | 0.769  | 0.77   | 0.873  | 0.834 | 0.848 |
| 0.639  | 0.692  | 0.608  | 0.596  | 0.63  | 0.582 |
| 0.713  | 0.726  | 0.656  | 0.537  | 0.649 | 0.512 |
| 0.607  | 0.602  | 0.676  | 0.481  | 0.554 | 0.567 |
| 0.623  | 0.67   | 0.692  | 0.582  | 0.76  | 0.658 |
| 0.392  | 0.636  | 0.5843 | 0.5627 | 0.503 | 0.569 |
| 0.354  | 0.526  | 0.587  | 0.598  | 0.572 | 0.426 |
| 0.242  | 0.529  | 0.604  | 0.568  | 0.402 | 0.338 |
| 0.326  | 0.457  | 0.562  | 0.522  | 0.535 | 0.415 |
| 0.298  | 0.515  | 0.786  | 0.922  | 1.004 | 0.767 |
| 0.223  | 0.377  | 0.537  | 0.765  | 0.651 | 0.464 |
| 0.166  | 0.32   | 0.545  | 0.538  | 0.474 | 0.338 |
| 0.191  | 0.268  | 0.442  | 0.524  | 0.519 | 0.375 |
| 0.868  | 0.763  | 0.713  | 0.691  | 0.676 | 0.66  |
| 0.909  | 0.79   | 0.658  | 0.661  | 0.683 | 0.68  |
| 0.728  | 0.714  | 0.698  | 0.659  | 0.578 | 0.639 |
| 0.767  | 0.682  | 0.621  | 0.601  | 0.619 | 0.639 |
| 0.833  | 0.857  | 0.81   | 0.88   | 0.841 | 0.816 |
| 0.832  | 0.825  | 0.79   | 0.834  | 0.819 | 0.821 |
| 0.744  | 0.825  | 0.831  | 0.817  | 0.768 | 0.802 |
| 0.741  | 0.748  | 0.759  | 0.76   | 0.737 | 0.727 |
| 0.701  | 0.757  | 0.749  | 0.8    | 0.786 | 0.765 |
| 0.699  | 0.644  | 0.671  | 0.731  | 0.667 | 0.672 |
| 0.575  | 0.669  | 0.732  | 0.706  | 0.618 | 0.618 |
| 0.647  | 0.667  | 0.658  | 0.698  | 0.658 | 0.773 |
| 0.635  | 0.685  | 0.599  | 0.661  | 0.641 | 0.671 |
| 0.62   | 0.645  | 0.693  | 0.682  | 0.728 | 0.717 |
| 0.68   | 0.681  | 0.733  | 0.656  | 0.633 | 0.654 |
| 0.56   | 0.565  | 0.535  | 0.571  | 0.591 | 0.62  |
| 0.918  | 0.8763 | 0.918  | 0.894  | 0.852 | 0.873 |
| 0.875  | 0.903  | 0.795  | 0.803  | 0.73  | 0.799 |
| 0.8797 | 0.872  | 0.827  | 0.809  | 0.725 | 0.741 |
| 0.846  | 0.854  | 0.801  | 0.834  | 0.812 | 0.876 |
| 0.226  | 0.2267 | 0.266  | 0.298  | 0.275 | 0.262 |
| 0.221  | 0.222  | 0.204  | 0.261  | 0.236 | 0.24  |
| 0.186  | 0.23   | 0.225  | 0.256  | 0.216 | 0.221 |
| 0.213  | 0.228  | 0.208  | 0.252  | 0.235 | 0.231 |
| 0.538  | 0.317  | 0.232  | 0.255  | 0.245 | 0.234 |

|       |       |       |       |       |       |
|-------|-------|-------|-------|-------|-------|
| 0.448 | 0.267 | 0.192 | 0.218 | 0.208 | 0.209 |
| 0.385 | 0.267 | 0.215 | 0.213 | 0.2   | 0.195 |
| 0.496 | 0.261 | 0.188 | 0.223 | 0.221 | 0.229 |
| 0.823 | 0.664 | 0.529 | 0.53  | 0.545 | 0.52  |
| 0.751 | 0.533 | 0.461 | 0.445 | 0.471 | 0.471 |
| 0.728 | 0.522 | 0.464 | 0.418 | 0.426 | 0.408 |
| 0.852 | 0.523 | 0.424 | 0.435 | 0.479 | 0.496 |
| 0.379 | 0.552 | 0.32  | 0.274 | 0.311 | 0.281 |
| 0.542 | 0.55  | 0.383 | 0.297 | 0.309 | 0.267 |
| 0.76  | 0.724 | 0.323 | 0.372 | 0.4   | 0.378 |
| 0.542 | 0.431 | 0.341 | 0.319 | 0.428 | 0.349 |
| 0.474 | 0.494 | 0.509 | 0.579 | 0.539 | 0.501 |
| 0.493 | 0.503 | 0.496 | 0.543 | 0.499 | 0.54  |
| 0.489 | 0.508 | 0.504 | 0.539 | 0.494 | 0.493 |
| 0.494 | 0.503 | 0.474 | 0.506 | 0.482 | 0.485 |
| 0.632 | 0.644 | 0.604 | 0.655 | 0.639 | 0.606 |
| 0.684 | 0.654 | 0.622 | 0.695 | 0.67  | 0.627 |
| 0.681 | 0.718 | 0.604 | 0.658 | 0.679 | 0.676 |
| 0.75  | 0.73  | 0.632 | 0.7   | 0.691 | 0.66  |
| 1.316 | 1.105 | 1.034 | 1.039 | 0.937 | 0.888 |
| 1.391 | 1.285 | 1.049 | 1.012 | 0.932 | 0.955 |
| 1.162 | 1.348 | 1.028 | 0.928 | 0.82  | 0.887 |
| 1.221 | 1.101 | 0.898 | 0.937 | 0.792 | 0.878 |
| 0.913 | 0.817 | 0.763 | 0.736 | 0.791 | 0.791 |
| 0.901 | 0.787 | 0.728 | 0.712 | 0.751 | 0.759 |
| 0.84  | 0.798 | 0.735 | 0.689 | 0.748 | 0.752 |
| 0.87  | 0.767 | 0.729 | 0.69  | 0.739 | 0.771 |
| 0.092 | 0.076 | 0.099 | 0.096 | 0.087 | 0.083 |
| 0.08  | 0.077 | 0.067 | 0.06  | 0.047 | 0.064 |
| 0.076 | 0.084 | 0.073 | 0.065 | 0.055 | 0.066 |
| 0.075 | 0.067 | 0.076 | 0.07  | 0.067 | 0.077 |
| 0.316 | 0.308 | 0.311 | 0.296 | 0.261 | 0.281 |
| 0.278 | 0.287 | 0.341 | 0.33  | 0.31  | 0.308 |
| 0.307 | 0.304 | 0.289 | 0.293 | 0.284 | 0.29  |
| 0.359 | 0.372 | 0.261 | 0.338 | 0.371 | 0.338 |
| 0.542 | 0.535 | 0.485 | 0.505 | 0.477 | 0.499 |

|       |       |       |       |       |        |
|-------|-------|-------|-------|-------|--------|
| 0.517 | 0.504 | 0.516 | 0.562 | 0.546 | 0.561  |
| 0.534 | 0.469 | 0.502 | 0.51  | 0.492 | 0.506  |
| 0.592 | 0.561 | 0.494 | 0.557 | 0.556 | 0.539  |
| 0.402 | 0.441 | 0.384 | 0.425 | 0.354 | 0.447  |
| 0.353 | 0.339 | 0.403 | 0.42  | 0.389 | 0.434  |
| 0.414 | 0.406 | 0.424 | 0.406 | 0.4   | 0.419  |
| 0.462 | 0.451 | 0.352 | 0.474 | 0.47  | 0.447  |
| 0.725 | 0.699 | 0.719 | 0.725 | 0.621 | 0.729  |
| 0.533 | 0.565 | 0.62  | 0.653 | 0.641 | 0.679  |
| 0.683 | 0.746 | 0.709 | 0.663 | 0.697 | 0.718  |
| 0.76  | 0.765 | 0.56  | 0.784 | 0.812 | 0.748  |
| 0.68  | 0.683 | 0.704 | 0.727 | 0.585 | 0.633  |
| 0.55  | 0.54  | 0.607 | 0.689 | 0.594 | 0.645  |
| 0.775 | 0.822 | 0.739 | 0.692 | 0.822 | 0.722  |
| 0.793 | 0.772 | 0.544 | 0.755 | 0.902 | 0.781  |
| 0.719 | 0.742 | 0.842 | 0.54  | 0.586 | 0.526  |
| 0.498 | 0.492 | 0.84  | 0.571 | 0.689 | 0.688  |
| 0.785 | 0.88  | 0.541 | 0.692 | 0.716 | 0.709  |
| 0.934 | 0.837 | 0.484 | 0.889 | 0.894 | 0.934  |
| 0.471 | 0.697 | 0.788 | 0.86  | 0.589 | 0.804  |
| 0.334 | 0.482 | 0.795 | 0.964 | 0.781 | 0.8    |
| 0.397 | 0.672 | 0.845 | 0.856 | 0.745 | 0.733  |
| 0.42  | 0.846 | 0.573 | 0.966 | 0.902 | 0.811  |
| 0.273 | 0.455 | 0.701 | 0.862 | 0.829 | 0.902  |
| 0.278 | 0.31  | 0.576 | 0.875 | 0.847 | 0.867  |
| 0.226 | 0.385 | 0.869 | 0.785 | 0.831 | 0.794  |
| 0.165 | 0.399 | 0.58  | 0.853 | 0.851 | 0.8543 |
| 0.899 | 0.784 | 0.668 | 0.682 | 0.647 | 0.645  |
| 0.689 | 0.648 | 0.77  | 0.785 | 0.766 | 0.778  |
| 0.827 | 0.706 | 0.655 | 0.691 | 0.676 | 0.638  |
| 0.916 | 0.896 | 0.553 | 0.739 | 0.769 | 0.761  |
| 0.72  | 0.737 | 0.673 | 0.704 | 0.685 | 0.753  |
| 0.707 | 0.705 | 0.738 | 0.773 | 0.773 | 0.833  |
| 0.669 | 0.657 | 0.749 | 0.635 | 0.676 | 0.668  |
| 0.76  | 0.773 | 0.708 | 0.762 | 0.765 | 0.757  |
| 0.667 | 0.685 | 0.738 | 0.74  | 0.574 | 0.724  |
| 0.469 | 0.445 | 0.752 | 0.774 | 0.689 | 0.732  |
| 0.721 | 0.646 | 0.664 | 0.83  | 0.802 | 0.757  |
| 0.756 | 0.758 | 0.718 | 0.859 | 0.845 | 0.848  |

|       |       |        |       |        |       |
|-------|-------|--------|-------|--------|-------|
| 0.655 | 0.642 | 0.663  | 0.608 | 0.6693 | 0.578 |
| 0.527 | 0.549 | 0.582  | 0.705 | 0.665  | 0.631 |
| 0.538 | 0.603 | 0.602  | 0.653 | 0.54   | 0.649 |
| 0.742 | 0.801 | 0.481  | 0.675 | 0.803  | 0.738 |
| 0.886 | 0.997 | 0.894  | 0.867 | 0.8177 | 0.887 |
| 0.59  | 0.692 | 0.958  | 0.837 | 0.782  | 0.853 |
| 0.763 | 0.86  | 0.883  | 0.746 | 0.818  | 0.849 |
| 0.837 | 0.963 | 0.634  | 0.849 | 0.853  | 0.915 |
| 0.228 | 0.251 | 0.255  | 0.287 | 0.239  | 0.288 |
| 0.188 | 0.19  | 0.254  | 0.261 | 0.248  | 0.271 |
| 0.221 | 0.226 | 0.26   | 0.262 | 0.268  | 0.272 |
| 0.232 | 0.253 | 0.2563 | 0.278 | 0.294  | 0.288 |
| 0.732 | 0.42  | 0.323  | 0.276 | 0.276  | 0.367 |
| 0.43  | 0.23  | 0.33   | 0.292 | 0.31   | 0.369 |
| 0.589 | 0.345 | 0.316  | 0.28  | 0.312  | 0.357 |
| 0.854 | 0.511 | 0.196  | 0.322 | 0.396  | 0.434 |
| 1.209 | 0.807 | 0.671  | 0.73  | 0.688  | 0.79  |
| 0.873 | 0.605 | 0.715  | 0.73  | 0.721  | 0.79  |
| 0.967 | 0.798 | 0.755  | 0.687 | 0.71   | 0.703 |
| 1.152 | 1.009 | 0.531  | 0.761 | 0.868  | 0.844 |
| 0.681 | 0.555 | 0.495  | 0.36  | 0.376  | 0.358 |
| 0.865 | 0.5   | 0.593  | 0.322 | 0.32   | 0.315 |
| 0.567 | 0.6   | 0.329  | 0.38  | 0.359  | 0.306 |
| 0.894 | 0.878 | 0.618  | 0.376 | 0.363  | 0.372 |
| 0.483 | 0.469 | 0.452  | 0.475 | 0.471  | 0.5   |
| 0.461 | 0.441 | 0.509  | 0.533 | 0.501  | 0.532 |
| 0.469 | 0.428 | 0.435  | 0.461 | 0.482  | 0.488 |
| 0.5   | 0.489 | 0.435  | 0.497 | 0.519  | 0.534 |
| 0.61  | 0.627 | 0.677  | 0.607 | 0.576  | 0.625 |
| 0.545 | 0.584 | 0.705  | 0.639 | 0.632  | 0.668 |
| 0.671 | 0.72  | 0.606  | 0.667 | 0.703  | 0.743 |
| 0.684 | 0.749 | 0.574  | 0.717 | 0.637  | 0.728 |
| 1.198 | 1.167 | 0.95   | 0.896 | 0.912  | 0.957 |
| 0.874 | 0.918 | 1.027  | 1.084 | 1.177  | 1.035 |
| 1.047 | 1.024 | 1.053  | 0.892 | 1.01   | 0.878 |
| 1.192 | 1.208 | 0.774  | 0.944 | 1.158  | 0.972 |
| 0.836 | 0.791 | 0.841  | 0.75  | 0.741  | 0.716 |
| 0.739 | 0.693 | 0.813  | 0.762 | 0.776  | 0.746 |
| 0.826 | 0.787 | 0.774  | 0.741 | 0.792  | 0.761 |
| 0.97  | 0.88  | 0.7    | 0.893 | 0.7697 | 0.829 |

|       |       |       |       |       |       |
|-------|-------|-------|-------|-------|-------|
| 0.077 | 0.095 | 0.08  | 0.109 | 0.092 | 0.116 |
| 0.071 | 0.047 | 0.072 | 0.081 | 0.092 | 0.099 |
| 0.071 | 0.068 | 0.104 | 0.084 | 0.084 | 0.112 |
| 0.065 | 0.084 | 0.047 | 0.083 | 0.099 | 0.106 |

|       |       |       |       |       |       |
|-------|-------|-------|-------|-------|-------|
| 0.301 | 0.287 | 0.282 | 0.315 | 0.301 | 0.315 |
| 0.284 | 0.303 | 0.273 | 0.304 | 0.287 | 0.32  |
| 0.317 | 0.296 | 0.302 | 0.334 | 0.315 | 0.309 |
| 0.326 | 0.291 | 0.265 | 0.311 | 0.308 | 0.3   |

|       |       |        |       |       |       |
|-------|-------|--------|-------|-------|-------|
| 0.581 | 0.52  | 0.595  | 0.497 | 0.532 | 0.547 |
| 0.572 | 0.578 | 0.494  | 0.54  | 0.558 | 0.534 |
| 0.646 | 0.568 | 0.5367 | 0.601 | 0.573 | 0.61  |
| 0.597 | 0.511 | 0.521  | 0.578 | 0.556 | 0.537 |

|       |        |       |       |       |       |
|-------|--------|-------|-------|-------|-------|
| 0.381 | 0.376  | 0.36  | 0.415 | 0.41  | 0.432 |
| 0.351 | 0.401  | 0.389 | 0.414 | 0.37  | 0.411 |
| 0.427 | 0.3927 | 0.41  | 0.441 | 0.407 | 0.435 |
| 0.435 | 0.401  | 0.351 | 0.44  | 0.438 | 0.442 |

|       |       |       |       |       |       |
|-------|-------|-------|-------|-------|-------|
| 0.649 | 0.591 | 0.635 | 0.646 | 0.672 | 0.714 |
| 0.631 | 0.629 | 0.675 | 0.683 | 0.631 | 0.675 |
| 0.69  | 0.585 | 0.656 | 0.664 | 0.657 | 0.675 |
| 0.724 | 0.651 | 0.623 | 0.691 | 0.668 | 0.702 |

|       |       |       |       |       |       |
|-------|-------|-------|-------|-------|-------|
| 0.659 | 0.669 | 0.687 | 0.637 | 0.522 | 0.565 |
| 0.51  | 0.613 | 0.716 | 0.683 | 0.543 | 0.539 |
| 0.727 | 0.804 | 0.717 | 0.731 | 0.66  | 0.694 |
| 0.759 | 0.771 | 0.602 | 0.731 | 0.843 | 0.653 |

|       |       |       |       |       |       |
|-------|-------|-------|-------|-------|-------|
| 0.625 | 0.673 | 0.549 | 0.564 | 0.713 | 0.561 |
| 0.554 | 0.75  | 0.684 | 0.564 | 0.727 | 0.555 |
| 0.636 | 0.761 | 0.577 | 0.64  | 0.702 | 0.593 |
| 0.724 | 0.722 | 0.546 | 0.697 | 0.762 | 0.762 |

|       |       |       |       |       |       |
|-------|-------|-------|-------|-------|-------|
| 0.379 | 0.532 | 0.778 | 0.729 | 0.577 | 0.63  |
| 0.296 | 0.612 | 0.697 | 0.79  | 0.603 | 0.63  |
| 0.452 | 0.617 | 0.779 | 0.86  | 0.598 | 0.636 |
| 0.453 | 0.701 | 0.541 | 0.884 | 0.731 | 0.69  |

|       |       |       |       |       |       |
|-------|-------|-------|-------|-------|-------|
| 0.373 | 0.478 | 0.641 | 0.865 | 0.836 | 0.901 |
| 0.257 | 0.448 | 0.598 | 0.753 | 0.708 | 0.727 |
| 0.285 | 0.384 | 0.884 | 0.744 | 0.681 | 0.748 |
| 0.218 | 0.437 | 0.629 | 0.729 | 0.654 | 0.739 |

|       |       |        |       |       |       |
|-------|-------|--------|-------|-------|-------|
| 0.73  | 0.66  | 0.65   | 0.682 | 0.592 | 0.651 |
| 0.667 | 0.76  | 0.648  | 0.745 | 0.7   | 0.736 |
| 0.922 | 0.734 | 0.648  | 0.781 | 0.678 | 0.729 |
| 0.916 | 0.764 | 0.566  | 0.782 | 0.672 | 0.674 |
| 0.791 | 0.796 | 0.818  | 0.785 | 0.762 | 0.765 |
| 0.778 | 0.824 | 0.758  | 0.836 | 0.867 | 0.787 |
| 0.869 | 0.835 | 0.882  | 0.879 | 0.828 | 0.808 |
| 0.801 | 0.782 | 0.789  | 0.835 | 0.794 | 0.733 |
| 0.503 | 0.537 | 0.614  | 0.601 | 0.567 | 0.657 |
| 0.456 | 0.603 | 0.724  | 0.617 | 0.583 | 0.628 |
| 0.614 | 0.574 | 0.591  | 0.669 | 0.6   | 0.64  |
| 0.587 | 0.628 | 0.522  | 0.683 | 0.63  | 0.709 |
| 0.58  | 0.597 | 0.6427 | 0.646 | 0.594 | 0.609 |
| 0.548 | 0.615 | 0.65   | 0.65  | 0.615 | 0.599 |
| 0.697 | 0.625 | 0.692  | 0.722 | 0.633 | 0.61  |
| 0.615 | 0.595 | 0.586  | 0.634 | 0.595 | 0.622 |
| 0.764 | 0.734 | 0.795  | 0.767 | 0.771 | 0.837 |
| 0.653 | 0.823 | 0.836  | 0.76  | 0.739 | 0.806 |
| 0.844 | 0.75  | 0.828  | 0.8   | 0.759 | 0.851 |
| 0.865 | 0.834 | 0.674  | 0.847 | 0.871 | 0.885 |
| 0.2   | 0.226 | 0.242  | 0.239 | 0.234 | 0.268 |
| 0.185 | 0.237 | 0.249  | 0.233 | 0.222 | 0.249 |
| 0.223 | 0.232 | 0.262  | 0.255 | 0.235 | 0.248 |
| 0.223 | 0.246 | 0.251  | 0.243 | 0.251 | 0.26  |
| 0.521 | 0.269 | 0.255  | 0.228 | 0.232 | 0.26  |
| 0.412 | 0.363 | 0.257  | 0.222 | 0.24  | 0.278 |
| 0.681 | 0.327 | 0.24   | 0.242 | 0.232 | 0.266 |
| 0.647 | 0.371 | 0.192  | 0.266 | 0.263 | 0.301 |
| 0.714 | 0.629 | 0.487  | 0.498 | 0.532 | 0.548 |
| 0.705 | 0.652 | 0.503  | 0.47  | 0.513 | 0.56  |
| 0.858 | 0.638 | 0.513  | 0.512 | 0.5   | 0.522 |
| 0.9   | 0.685 | 0.428  | 0.536 | 0.574 | 0.588 |
| 0.61  | 0.468 | 0.395  | 0.361 | 0.35  | 0.338 |
| 0.661 | 0.391 | 0.389  | 0.325 | 0.29  | 0.318 |
| 0.416 | 0.476 | 0.388  | 0.309 | 0.322 | 0.288 |
| 0.798 | 0.616 | 0.38   | 0.348 | 0.374 | 0.315 |
| 0.483 | 0.456 | 0.475  | 0.484 | 0.489 | 0.492 |
| 0.464 | 0.524 | 0.442  | 0.502 | 0.496 | 0.494 |
| 0.531 | 0.498 | 0.468  | 0.526 | 0.514 | 0.516 |

|       |       |       |        |        |        |
|-------|-------|-------|--------|--------|--------|
| 0.535 | 0.513 | 0.433 | 0.548  | 0.544  | 0.484  |
| 0.642 | 0.62  | 0.742 | 0.582  | 0.602  | 0.58   |
| 0.674 | 0.674 | 0.714 | 0.642  | 0.649  | 0.626  |
| 0.743 | 0.699 | 0.601 | 0.665  | 0.656  | 0.678  |
| 0.752 | 0.732 | 0.583 | 0.677  | 0.739  | 0.705  |
| 1.124 | 1.071 | 1.032 | 0.883  | 0.878  | 0.962  |
| 1.01  | 1.275 | 0.925 | 0.964  | 0.986  | 1.026  |
| 1.481 | 1.222 | 0.943 | 0.96   | 0.922  | 1.036  |
| 1.285 | 1.154 | 0.853 | 0.984  | 1      | 0.994  |
| 0.733 | 0.701 | 0.681 | 0.731  | 0.694  | 0.698  |
| 0.722 | 0.767 | 0.712 | 0.745  | 0.752  | 0.703  |
| 0.848 | 0.756 | 0.75  | 0.761  | 0.748  | 0.735  |
| 0.913 | 0.761 | 0.657 | 0.781  | 0.784  | 0.71   |
| 0.068 | 0.06  | 0.086 | 0.067  | 0.055  | 0.076  |
| 0.042 | 0.072 | 0.06  | 0.054  | 0.061  | 0.072  |
| 0.085 | 0.086 | 0.074 | 0.074  | 0.073  | 0.078  |
| 0.073 | 0.082 | 0.048 | 0.079  | 0.084  | 0.091  |
| 0.327 | 0.305 | 0.301 | 0.316  | 0.299  | 0.302  |
| 0.373 | 0.355 | 0.335 | 0.369  | 0.389  | 0.358  |
| 0.32  | 0.297 | 0.286 | 0.32   | 0.308  | 0.302  |
| 0.349 | 0.337 | 0.305 | 0.324  | 0.326  | 0.342  |
| 0.565 | 0.512 | 0.501 | 0.5    | 0.522  | 0.506  |
| 0.632 | 0.582 | 0.557 | 0.556  | 0.5327 | 0.5257 |
| 0.556 | 0.523 | 0.501 | 0.494  | 0.535  | 0.539  |
| 0.587 | 0.556 | 0.534 | 0.53   | 0.541  | 0.532  |
| 0.415 | 0.426 | 0.405 | 0.4677 | 0.413  | 0.413  |
| 0.431 | 0.459 | 0.48  | 0.477  | 0.475  | 0.475  |
| 0.417 | 0.416 | 0.437 | 0.441  | 0.408  | 0.426  |
| 0.42  | 0.424 | 0.475 | 0.485  | 0.441  | 0.418  |
| 0.709 | 0.71  | 0.685 | 0.74   | 0.722  | 0.713  |
| 0.747 | 0.745 | 0.731 | 0.802  | 0.81   | 0.804  |
| 0.703 | 0.731 | 0.712 | 0.727  | 0.707  | 0.709  |
| 0.719 | 0.738 | 0.738 | 0.772  | 0.751  | 0.756  |
| 0.872 | 0.879 | 0.791 | 0.754  | 0.777  | 0.721  |
| 0.879 | 0.801 | 0.808 | 0.786  | 0.766  | 0.673  |
| 0.731 | 0.695 | 0.72  | 0.68   | 0.774  | 0.652  |

|       |        |       |        |        |       |
|-------|--------|-------|--------|--------|-------|
| 0.691 | 0.707  | 0.731 | 0.825  | 0.767  | 0.664 |
| 0.743 | 0.72   | 0.63  | 0.665  | 0.681  | 0.679 |
| 0.83  | 0.744  | 0.853 | 0.775  | 0.776  | 0.746 |
| 0.653 | 0.594  | 0.49  | 0.497  | 0.654  | 0.563 |
| 0.763 | 0.686  | 0.545 | 0.629  | 0.962  | 1.105 |
| 0.454 | 0.694  | 0.722 | 0.754  | 0.732  | 0.531 |
| 0.49  | 0.639  | 0.743 | 0.751  | 0.716  | 0.52  |
| 0.444 | 0.603  | 0.728 | 0.741  | 0.67   | 0.521 |
| 0.423 | 0.599  | 0.695 | 0.665  | 0.59   | 0.399 |
| 0.183 | 0.368  | 0.602 | 0.631  | 0.651  | 0.564 |
| 0.225 | 0.345  | 0.613 | 0.658  | 0.656  | 0.59  |
| 0.209 | 0.353  | 0.608 | 0.636  | 0.608  | 0.487 |
| 0.182 | 0.21   | 0.543 | 0.6417 | 0.326  | 0.275 |
| 0.967 | 0.784  | 0.649 | 0.675  | 0.667  | 0.72  |
| 1.065 | 0.824  | 0.782 | 0.832  | 0.781  | 0.795 |
| 0.917 | 0.745  | 0.696 | 0.719  | 0.678  | 0.751 |
| 0.873 | 0.797  | 0.681 | 0.709  | 0.679  | 0.735 |
| 0.739 | 0.761  | 0.731 | 0.733  | 0.716  | 0.737 |
| 0.823 | 0.813  | 0.821 | 0.7303 | 0.767  | 0.806 |
| 0.759 | 0.73   | 0.73  | 0.724  | 0.715  | 0.722 |
| 0.75  | 0.753  | 0.729 | 0.734  | 0.7327 | 0.748 |
| 0.652 | 0.669  | 0.64  | 0.663  | 0.676  | 0.667 |
| 0.583 | 0.616  | 0.678 | 0.636  | 0.62   | 0.605 |
| 0.611 | 0.652  | 0.657 | 0.633  | 0.605  | 0.677 |
| 0.786 | 0.6457 | 0.733 | 0.768  | 0.833  | 0.884 |
| 0.439 | 0.403  | 0.507 | 0.419  | 0.408  | 0.431 |
| 0.661 | 0.595  | 0.613 | 0.648  | 0.63   | 0.664 |
| 0.46  | 0.536  | 0.431 | 0.454  | 0.421  | 0.462 |
| 0.509 | 0.66   | 0.526 | 0.549  | 0.571  | 0.709 |
| 0.97  | 0.891  | 0.862 | 0.822  | 0.831  | 0.933 |
| 1.016 | 0.918  | 0.936 | 0.86   | 0.901  | 0.968 |
| 0.989 | 0.869  | 0.859 | 0.848  | 0.842  | 0.991 |
| 1.029 | 0.984  | 0.966 | 0.837  | 0.861  | 0.982 |
| 0.223 | 0.23   | 0.251 | 0.265  | 0.257  | 0.251 |
| 0.232 | 0.245  | 0.283 | 0.286  | 0.291  | 0.283 |
| 0.188 | 0.186  | 0.331 | 0.245  | 0.226  | 0.224 |
| 0.277 | 0.319  | 0.267 | 0.316  | 0.357  | 0.334 |
| 0.646 | 0.343  | 0.229 | 0.234  | 0.241  | 0.271 |
| 0.635 | 0.333  | 0.248 | 0.248  | 0.255  | 0.279 |

|       |        |        |        |       |       |
|-------|--------|--------|--------|-------|-------|
| 0.651 | 0.344  | 0.25   | 0.237  | 0.252 | 0.295 |
| 0.647 | 0.363  | 0.321  | 0.257  | 0.253 | 0.281 |
| 0.93  | 0.663  | 0.468  | 0.505  | 0.528 | 0.568 |
| 0.929 | 0.662  | 0.527  | 0.557  | 0.591 | 0.612 |
| 0.94  | 0.654  | 0.499  | 0.501  | 0.544 | 0.625 |
| 1.084 | 0.644  | 0.552  | 0.554  | 0.546 | 0.538 |
| 0.143 | 0.15   | 0.134  | 0.135  | 0.129 | 0.117 |
| 0.138 | 0.138  | 0.129  | 0.133  | 0.12  | 0.112 |
| 0.147 | 0.159  | 0.1315 | 0.137  | 0.144 | 0.133 |
| 0.149 | 0.164  | 0.1315 | 0.135  | 0.131 | 0.168 |
| 0.501 | 0.518  | 0.477  | 0.494  | 0.483 | 0.5   |
| 0.546 | 0.551  | 0.528  | 0.548  | 0.546 | 0.587 |
| 0.526 | 0.504  | 0.464  | 0.504  | 0.486 | 0.505 |
| 0.546 | 0.545  | 0.531  | 0.543  | 0.511 | 0.546 |
| 0.652 | 0.636  | 0.646  | 0.65   | 0.57  | 0.621 |
| 0.726 | 0.738  | 0.7    | 0.726  | 0.683 | 0.75  |
| 0.663 | 0.62   | 0.648  | 0.662  | 0.611 | 0.639 |
| 0.67  | 0.667  | 0.669  | 0.681  | 0.596 | 0.733 |
| 1.052 | 1.027  | 0.862  | 0.875  | 0.922 | 0.995 |
| 1.265 | 1.47   | 1.123  | 1.116  | 1.131 | 1.161 |
| 1.185 | 1.114  | 0.923  | 0.921  | 0.897 | 0.97  |
| 1.331 | 1.22   | 1.01   | 0.929  | 0.895 | 0.955 |
| 0.898 | 0.778  | 0.723  | 0.768  | 0.746 | 0.748 |
| 0.942 | 0.792  | 0.801  | 0.842  | 0.81  | 0.797 |
| 0.937 | 0.803  | 0.753  | 0.792  | 0.758 | 0.809 |
| 0.905 | 0.793  | 0.825  | 0.888  | 0.785 | 0.82  |
| 0.094 | 0.112  | 0.083  | 0.079  | 0.078 | 0.102 |
| 0.097 | 0.112  | 0.103  | 0.093  | 0.096 | 0.121 |
| 0.078 | 0.1033 | 0.076  | 0.081  | 0.11  | 0.088 |
| 0.087 | 0.086  | 0.0873 | 0.0843 | 0.084 | 0.081 |
| 0.278 | 0.263  | 0.249  | 0.27   | 0.263 | 0.282 |
| 0.31  | 0.267  | 0.246  | 0.259  | 0.255 | 0.28  |
| 0.28  | 0.292  | 0.282  | 0.28   | 0.293 | 0.304 |
| 0.284 | 0.285  | 0.267  | 0.297  | 0.287 | 0.304 |
| 0.495 | 0.42   | 0.42   | 0.425  | 0.409 | 0.436 |
| 0.514 | 0.425  | 0.427  | 0.416  | 0.41  | 0.445 |

|       |       |       |       |       |       |
|-------|-------|-------|-------|-------|-------|
| 0.489 | 0.518 | 0.475 | 0.447 | 0.446 | 0.47  |
| 0.513 | 0.474 | 0.455 | 0.475 | 0.443 | 0.457 |
| 0.399 | 0.371 | 0.374 | 0.37  | 0.342 | 0.379 |
| 0.415 | 0.381 | 0.372 | 0.363 | 0.351 | 0.374 |
| 0.38  | 0.417 | 0.417 | 0.375 | 0.384 | 0.412 |
| 0.404 | 0.413 | 0.401 | 0.401 | 0.367 | 0.391 |
| 0.702 | 0.651 | 0.639 | 0.619 | 0.638 | 0.711 |
| 0.715 | 0.655 | 0.657 | 0.627 | 0.639 | 0.706 |
| 0.646 | 0.69  | 0.688 | 0.643 | 0.684 | 0.732 |
| 0.671 | 0.696 | 0.666 | 0.66  | 0.662 | 0.732 |
| 0.848 | 0.834 | 0.858 | 0.785 | 0.755 | 0.776 |
| 0.778 | 0.804 | 0.812 | 0.764 | 0.711 | 0.791 |
| 0.831 | 0.857 | 0.788 | 0.698 | 0.751 | 0.829 |
| 0.74  | 0.729 | 0.73  | 0.729 | 0.703 | 0.705 |
| 0.674 | 0.669 | 0.652 | 0.626 | 0.607 | 0.628 |
| 0.676 | 0.644 | 0.652 | 0.608 | 0.577 | 0.638 |
| 0.67  | 0.7   | 0.653 | 0.58  | 0.606 | 0.637 |
| 0.647 | 0.655 | 0.64  | 0.643 | 0.591 | 0.613 |
| 0.52  | 0.783 | 0.953 | 0.823 | 0.786 | 0.8   |
| 0.473 | 0.783 | 0.88  | 0.8   | 0.726 | 0.855 |
| 0.542 | 0.754 | 0.863 | 0.79  | 0.739 | 0.818 |
| 0.453 | 0.739 | 0.794 | 0.749 | 0.696 | 0.736 |
| 0.353 | 0.567 | 0.927 | 0.973 | 0.937 | 0.918 |
| 0.309 | 0.556 | 0.854 | 0.942 | 0.834 | 0.94  |
| 0.273 | 0.514 | 0.842 | 0.891 | 0.869 | 0.839 |
| 0.242 | 0.518 | 0.856 | 0.948 | 0.836 | 0.904 |
| 0.997 | 0.877 | 0.735 | 0.671 | 0.681 | 0.754 |
| 1.01  | 0.839 | 0.756 | 0.681 | 0.67  | 0.74  |
| 1.028 | 0.919 | 0.794 | 0.705 | 0.734 | 0.742 |
| 1.041 | 0.91  | 0.682 | 0.718 | 0.688 | 0.712 |
| 0.672 | 0.714 | 0.679 | 0.69  | 0.64  | 0.711 |
| 0.688 | 0.714 | 0.674 | 0.688 | 0.639 | 0.711 |
| 0.69  | 0.77  | 0.745 | 0.683 | 0.663 | 0.711 |
| 0.724 | 0.744 | 0.722 | 0.762 | 0.663 | 0.707 |
| 0.673 | 0.724 | 0.751 | 0.737 | 0.707 | 0.82  |
| 0.648 | 0.717 | 0.725 | 0.716 | 0.699 | 0.811 |
| 0.697 | 0.73  | 0.761 | 0.654 | 0.698 | 0.826 |
| 0.625 | 0.668 | 0.687 | 0.705 | 0.694 | 0.781 |
| 0.653 | 0.783 | 0.729 | 0.749 | 0.66  | 0.752 |

|       |       |       |       |       |       |
|-------|-------|-------|-------|-------|-------|
| 0.814 | 0.811 | 0.741 | 0.716 | 0.659 | 0.724 |
| 0.804 | 0.78  | 0.985 | 0.592 | 0.659 | 0.784 |
| 0.726 | 0.76  | 0.895 | 0.973 | 0.63  | 0.751 |
| 0.775 | 0.709 | 0.649 | 0.644 | 0.692 | 0.715 |
| 0.784 | 0.73  | 0.657 | 0.633 | 0.69  | 0.717 |
| 0.725 | 0.773 | 0.712 | 0.624 | 0.728 | 0.722 |
| 0.75  | 0.753 | 0.674 | 0.672 | 0.698 | 0.722 |
| 0.225 | 0.216 | 0.226 | 0.229 | 0.227 | 0.258 |
| 0.226 | 0.218 | 0.225 | 0.23  | 0.225 | 0.259 |
| 0.202 | 0.244 | 0.264 | 0.234 | 0.257 | 0.288 |
| 0.218 | 0.245 | 0.249 | 0.251 | 0.248 | 0.287 |
| 0.637 | 0.364 | 0.239 | 0.225 | 0.234 | 0.267 |
| 0.796 | 0.276 | 0.227 | 0.221 | 0.227 | 0.287 |
| 0.649 | 0.404 | 0.265 | 0.231 | 0.265 | 0.302 |
| 0.569 | 0.364 | 0.247 | 0.26  | 0.267 | 0.293 |
| 1.108 | 0.76  | 0.551 | 0.508 | 0.538 | 0.644 |
| 1.116 | 0.706 | 0.56  | 0.523 | 0.536 | 0.647 |
| 0.906 | 0.771 | 0.593 | 0.502 | 0.568 | 0.683 |
| 0.801 | 0.733 | 0.545 | 0.524 | 0.561 | 0.643 |
| 0.562 | 0.347 | 0.438 | 0.331 | 0.324 | 0.306 |
| 0.529 | 0.556 | 0.402 | 0.347 | 0.333 | 0.313 |
| 0.303 | 0.378 | 0.482 | 0.41  | 0.29  | 0.295 |
| 0.379 | 0.64  | 0.452 | 0.368 | 0.329 | 0.286 |
| 0.474 | 0.419 | 0.429 | 0.436 | 0.443 | 0.484 |
| 0.477 | 0.426 | 0.433 | 0.429 | 0.438 | 0.497 |
| 0.424 | 0.469 | 0.494 | 0.478 | 0.497 | 0.527 |
| 0.463 | 0.482 | 0.486 | 0.508 | 0.493 | 0.545 |
| 0.548 | 0.578 | 0.556 | 0.544 | 0.547 | 0.618 |
| 0.618 | 0.578 | 0.568 | 0.559 | 0.547 | 0.615 |
| 0.571 | 0.598 | 0.603 | 0.55  | 0.545 | 0.635 |
| 0.597 | 0.605 | 0.552 | 0.56  | 0.544 | 0.643 |
| 0.804 | 0.812 | 0.701 | 0.622 | 0.57  | 0.669 |
| 0.91  | 0.8   | 0.695 | 0.653 | 0.623 | 0.669 |
| 0.765 | 0.795 | 0.909 | 0.674 | 0.704 | 0.767 |
| 0.84  | 1.011 | 0.869 | 0.858 | 0.682 | 0.753 |
| 0.692 | 0.58  | 0.542 | 0.564 | 0.545 | 0.563 |
| 0.689 | 0.574 | 0.54  | 0.562 | 0.553 | 0.552 |
| 0.661 | 0.603 | 0.581 | 0.585 | 0.574 | 0.575 |
| 0.669 | 0.6   | 0.575 | 0.59  | 0.579 | 0.564 |

|       |       |       |       |       |       |
|-------|-------|-------|-------|-------|-------|
| 0.082 | 0.094 | 0.075 | 0.07  | 0.066 | 0.098 |
| 0.097 | 0.078 | 0.087 | 0.057 | 0.062 | 0.111 |
| 0.086 | 0.101 | 0.095 | 0.069 | 0.09  | 0.125 |
| 0.085 | 0.094 | 0.072 | 0.077 | 0.076 | 0.115 |

|       |       |       |       |       |       |
|-------|-------|-------|-------|-------|-------|
| 0.299 | 0.296 | 0.298 | 0.302 | 0.304 | 0.285 |
| 0.286 | 0.292 | 0.296 | 0.295 | 0.296 | 0.286 |
| 0.318 | 0.274 | 0.276 | 0.275 | 0.271 | 0.269 |
| 0.29  | 0.265 | 0.271 | 0.271 | 0.268 | 0.261 |

|       |       |       |       |       |       |
|-------|-------|-------|-------|-------|-------|
| 0.493 | 0.479 | 0.478 | 0.449 | 0.437 | 0.449 |
| 0.472 | 0.461 | 0.433 | 0.431 | 0.436 | 0.425 |
| 0.519 | 0.443 | 0.425 | 0.425 | 0.409 | 0.416 |
| 0.466 | 0.448 | 0.405 | 0.409 | 0.393 | 0.41  |

|       |       |       |       |       |       |
|-------|-------|-------|-------|-------|-------|
| 0.365 | 0.303 | 0.324 | 0.357 | 0.354 | 0.359 |
| 0.366 | 0.309 | 0.314 | 0.351 | 0.34  | 0.362 |
| 0.302 | 0.329 | 0.327 | 0.365 | 0.348 | 0.368 |
| 0.34  | 0.33  | 0.323 | 0.36  | 0.341 | 0.356 |

|       |       |       |       |       |       |
|-------|-------|-------|-------|-------|-------|
| 0.623 | 0.648 | 0.594 | 0.62  | 0.598 | 0.605 |
| 0.64  | 0.656 | 0.579 | 0.589 | 0.589 | 0.586 |
| 0.611 | 0.62  | 0.575 | 0.624 | 0.599 | 0.608 |
| 0.596 | 0.6   | 0.559 | 0.606 | 0.585 | 0.596 |

|       |       |       |       |       |       |
|-------|-------|-------|-------|-------|-------|
| 0.842 | 0.895 | 0.9   | 0.848 | 0.751 | 0.861 |
| 0.776 | 0.845 | 0.759 | 0.722 | 0.627 | 0.764 |
| 0.828 | 0.878 | 0.832 | 0.84  | 0.639 | 0.666 |
| 0.728 | 0.736 | 0.728 | 0.751 | 0.644 | 0.688 |

|       |       |       |       |       |       |
|-------|-------|-------|-------|-------|-------|
| 0.763 | 0.654 | 0.492 | 0.532 | 0.626 | 0.543 |
| 0.732 | 0.618 | 0.566 | 0.635 | 0.595 | 0.665 |
| 0.631 | 0.689 | 0.585 | 0.666 | 0.593 | 0.577 |
| 0.669 | 0.658 | 0.581 | 0.63  | 0.578 | 0.602 |

|       |       |       |       |       |       |
|-------|-------|-------|-------|-------|-------|
| 0.646 | 0.976 | 0.953 | 0.93  | 0.854 | 0.844 |
| 0.581 | 0.878 | 0.846 | 0.841 | 0.788 | 0.824 |
| 0.62  | 0.871 | 0.823 | 0.903 | 0.761 | 0.668 |
| 0.554 | 0.777 | 0.773 | 0.791 | 0.727 | 0.706 |

|       |       |       |       |       |       |
|-------|-------|-------|-------|-------|-------|
| 0.444 | 0.749 | 1.023 | 1.129 | 1.108 | 1.028 |
| 0.403 | 0.678 | 0.916 | 1.038 | 0.975 | 1.049 |
| 0.393 | 0.644 | 0.847 | 1.066 | 1.025 | 0.978 |
| 0.4   | 0.608 | 0.825 | 0.98  | 0.909 | 0.992 |

|       |        |       |       |       |       |
|-------|--------|-------|-------|-------|-------|
| 1.094 | 0.911  | 0.691 | 0.639 | 0.671 | 0.704 |
| 0.965 | 0.867  | 0.654 | 0.606 | 0.632 | 0.705 |
| 1.035 | 0.852  | 0.685 | 0.62  | 0.6   | 0.606 |
| 0.933 | 0.816  | 0.635 | 0.593 | 0.617 | 0.617 |
| 0.69  | 0.662  | 0.668 | 0.643 | 0.625 | 0.641 |
| 0.664 | 0.671  | 0.662 | 0.634 | 0.617 | 0.653 |
| 0.674 | 0.675  | 0.681 | 0.649 | 0.619 | 0.639 |
| 0.661 | 0.664  | 0.67  | 0.651 | 0.623 | 0.647 |
| 0.731 | 0.859  | 0.835 | 0.848 | 0.798 | 0.826 |
| 0.66  | 0.812  | 0.741 | 0.783 | 0.714 | 0.822 |
| 0.796 | 0.773  | 0.75  | 0.803 | 0.705 | 0.769 |
| 0.695 | 0.709  | 0.708 | 0.792 | 0.708 | 0.731 |
| 1.055 | 1.2    | 1.262 | 1.266 | 1.345 | 1.224 |
| 0.895 | 1.111  | 1.024 | 1.156 | 1.093 | 1.145 |
| 1.314 | 0.972  | 0.993 | 1.105 | 0.856 | 1.009 |
| 0.954 | 0.973  | 0.856 | 0.935 | 0.841 | 0.876 |
| 0.841 | 0.823  | 0.828 | 0.742 | 0.732 | 0.781 |
| 0.842 | 0.771  | 0.755 | 0.681 | 0.692 | 0.778 |
| 0.776 | 0.785  | 0.743 | 0.695 | 0.687 | 0.756 |
| 0.735 | 0.759  | 0.724 | 0.676 | 0.681 | 0.763 |
| 0.212 | 0.208  | 0.22  | 0.228 | 0.216 | 0.239 |
| 0.204 | 0.2047 | 0.202 | 0.216 | 0.205 | 0.236 |
| 0.19  | 0.208  | 0.207 | 0.23  | 0.208 | 0.24  |
| 0.193 | 0.198  | 0.195 | 0.217 | 0.202 | 0.242 |
| 0.49  | 0.325  | 0.237 | 0.22  | 0.234 | 0.254 |
| 0.464 | 0.298  | 0.214 | 0.206 | 0.216 | 0.266 |
| 0.443 | 0.302  | 0.222 | 0.222 | 0.212 | 0.241 |
| 0.423 | 0.288  | 0.205 | 0.207 | 0.201 | 0.244 |
| 0.806 | 0.687  | 0.51  | 0.481 | 0.502 | 0.526 |
| 0.793 | 0.63   | 0.448 | 0.437 | 0.459 | 0.553 |
| 0.772 | 0.633  | 0.479 | 0.48  | 0.487 | 0.521 |
| 0.764 | 0.582  | 0.433 | 0.444 | 0.453 | 0.531 |
| 0.509 | 0.176  | 0.355 | 0.273 | 0.257 | 0.281 |
| 0.488 | 0.457  | 0.374 | 0.262 | 0.246 | 0.274 |
| 0.143 | 0.325  | 0.392 | 0.299 | 0.3   | 0.27  |
| 0.32  | 0.444  | 0.364 | 0.305 | 0.28  | 0.271 |
| 0.458 | 0.474  | 0.455 | 0.452 | 0.428 | 0.437 |
| 0.447 | 0.46   | 0.448 | 0.438 | 0.423 | 0.448 |
| 0.453 | 0.467  | 0.419 | 0.417 | 0.398 | 0.431 |
| 0.433 | 0.467  | 0.407 | 0.416 | 0.392 | 0.427 |

|        |        |        |       |        |       |
|--------|--------|--------|-------|--------|-------|
| 0.573  | 0.599  | 0.62   | 0.587 | 0.603  | 0.607 |
| 0.581  | 0.591  | 0.621  | 0.582 | 0.613  | 0.615 |
| 0.643  | 0.556  | 0.584  | 0.54  | 0.561  | 0.559 |
| 0.612  | 0.549  | 0.578  | 0.538 | 0.564  | 0.573 |
| 0.848  | 0.836  | 0.706  | 0.647 | 0.639  | 0.634 |
| 0.815  | 0.829  | 0.652  | 0.615 | 0.588  | 0.697 |
| 0.797  | 0.83   | 0.652  | 0.628 | 0.564  | 0.617 |
| 0.71   | 0.793  | 0.666  | 0.623 | 0.56   | 0.647 |
| 0.719  | 0.565  | 0.521  | 0.536 | 0.525  | 0.55  |
| 0.717  | 0.572  | 0.52   | 0.518 | 0.532  | 0.558 |
| 0.693  | 0.568  | 0.517  | 0.537 | 0.526  | 0.545 |
| 0.67   | 0.562  | 0.523  | 0.532 | 0.529  | 0.552 |
| 0.121  | 0.142  | 0.134  | 0.104 | 0.102  | 0.095 |
| 0.112  | 0.104  | 0.078  | 0.063 | 0.069  | 0.104 |
| 0.089  | 0.132  | 0.11   | 0.108 | 0.084  | 0.1   |
| 0.102  | 0.106  | 0.081  | 0.079 | 0.071  | 0.096 |
| 0.28   | 0.282  | 0.266  | 0.312 | 0.284  | 0.279 |
| 0.387  | 0.334  | 0.328  | 0.335 | 0.337  | 0.329 |
| 0.33   | 0.299  | 0.263  | 0.308 | 0.296  | 0.276 |
| 0.334  | 0.323  | 0.307  | 0.292 | 0.334  | 0.324 |
| 0.5425 | 0.468  | 0.494  | 0.51  | 0.471  | 0.524 |
| 0.549  | 0.573  | 0.522  | 0.549 | 0.548  | 0.607 |
| 0.5425 | 0.517  | 0.474  | 0.512 | 0.514  | 0.537 |
| 0.536  | 0.55   | 0.556  | 0.528 | 0.537  | 0.589 |
| 0.4183 | 0.388  | 0.447  | 0.435 | 0.4263 | 0.425 |
| 0.432  | 0.426  | 0.423  | 0.438 | 0.424  | 0.428 |
| 0.406  | 0.401  | 0.385  | 0.445 | 0.422  | 0.421 |
| 0.417  | 0.397  | 0.457  | 0.435 | 0.433  | 0.438 |
| 0.605  | 0.685  | 0.685  | 0.732 | 0.599  | 0.695 |
| 0.749  | 0.6907 | 0.696  | 0.759 | 0.651  | 0.76  |
| 0.653  | 0.688  | 0.6847 | 0.721 | 0.681  | 0.672 |
| 0.688  | 0.699  | 0.673  | 0.711 | 0.682  | 0.784 |
| 0.526  | 0.583  | 0.643  | 0.735 | 0.52   | 0.679 |
| 0.6    | 0.842  | 0.774  | 0.722 | 0.6    | 0.647 |
| 0.676  | 0.724  | 0.553  | 0.668 | 0.641  | 0.779 |
| 0.853  | 0.656  | 0.84   | 0.813 | 0.739  | 0.679 |

|        |       |        |        |        |        |
|--------|-------|--------|--------|--------|--------|
| 0.539  | 0.563 | 0.647  | 0.746  | 0.495  | 0.695  |
| 0.655  | 0.797 | 0.642  | 0.73   | 0.491  | 0.79   |
| 0.635  | 0.656 | 0.521  | 0.576  | 0.607  | 0.662  |
| 0.718  | 0.924 | 0.758  | 0.674  | 0.692  | 0.7157 |
| 0.361  | 0.673 | 0.914  | 0.867  | 0.656  | 0.691  |
| 0.434  | 0.829 | 0.901  | 0.749  | 0.547  | 0.707  |
| 0.489  | 0.774 | 0.756  | 0.773  | 0.777  | 0.7    |
| 0.649  | 0.762 | 0.942  | 0.745  | 0.735  | 0.524  |
| 0.245  | 0.382 | 0.57   | 0.762  | 0.658  | 0.677  |
| 0.264  | 0.474 | 0.324  | 0.744  | 0.605  | 0.702  |
| 0.225  | 0.458 | 0.578  | 0.792  | 0.759  | 0.618  |
| 0.258  | 0.265 | 0.697  | 0.604  | 0.454  | 0.6657 |
| 0.665  | 0.705 | 0.678  | 0.7    | 0.6583 | 0.678  |
| 0.907  | 0.897 | 0.79   | 0.714  | 0.664  | 0.687  |
| 0.918  | 0.817 | 0.604  | 0.646  | 0.645  | 0.688  |
| 1.039  | 0.799 | 0.795  | 0.693  | 0.666  | 0.695  |
| 0.7763 | 0.669 | 0.71   | 0.766  | 0.764  | 0.738  |
| 0.788  | 0.757 | 0.735  | 0.7487 | 0.752  | 0.846  |
| 0.758  | 0.753 | 0.738  | 0.742  | 0.758  | 0.705  |
| 0.783  | 0.752 | 0.769  | 0.738  | 0.782  | 0.795  |
| 0.445  | 0.549 | 0.709  | 0.687  | 0.535  | 0.73   |
| 0.585  | 0.683 | 0.626  | 0.644  | 0.556  | 0.665  |
| 0.634  | 0.643 | 0.514  | 0.642  | 0.665  | 0.707  |
| 0.806  | 0.907 | 0.655  | 0.777  | 0.855  | 0.984  |
| 0.37   | 0.449 | 0.512  | 0.432  | 0.417  | 0.395  |
| 0.639  | 0.618 | 0.704  | 0.552  | 0.583  | 0.628  |
| 0.543  | 0.558 | 0.425  | 0.44   | 0.56   | 0.542  |
| 0.624  | 0.648 | 0.58   | 0.562  | 0.647  | 0.728  |
| 0.9517 | 0.801 | 0.891  | 0.858  | 0.8825 | 0.94   |
| 0.912  | 0.945 | 0.907  | 0.842  | 0.8825 | 0.985  |
| 0.943  | 0.934 | 0.8907 | 0.868  | 0.87   | 0.962  |
| 1      | 0.966 | 0.874  | 0.897  | 0.895  | 0.994  |
| 0.181  | 0.223 | 0.283  | 0.273  | 0.236  | 0.262  |
| 0.225  | 0.258 | 0.329  | 0.275  | 0.253  | 0.283  |
| 0.186  | 0.199 | 0.241  | 0.284  | 0.226  | 0.3133 |
| 0.247  | 0.319 | 0.279  | 0.304  | 0.347  | 0.395  |
| 0.375  | 0.26  | 0.248  | 0.241  | 0.21   | 0.266  |
| 0.483  | 0.288 | 0.29   | 0.236  | 0.209  | 0.276  |
| 0.631  | 0.374 | 0.203  | 0.241  | 0.268  | 0.268  |

|       |       |        |       |        |       |
|-------|-------|--------|-------|--------|-------|
| 0.725 | 0.35  | 0.263  | 0.252 | 0.273  | 0.285 |
| 0.7   | 0.578 | 0.571  | 0.536 | 0.5103 | 0.576 |
| 0.824 | 0.588 | 0.536  | 0.525 | 0.481  | 0.625 |
| 0.899 | 0.732 | 0.5577 | 0.551 | 0.533  | 0.602 |
| 0.947 | 0.662 | 0.566  | 0.531 | 0.517  | 0.579 |
| 0.926 | 0.524 | 0.391  | 0.342 | 0.379  | 0.365 |
| 0.723 | 0.468 | 0.421  | 0.369 | 0.402  | 0.363 |
| 0.682 | 0.674 | 0.409  | 0.354 | 0.326  | 0.333 |
| 0.608 | 0.632 | 0.37   | 0.365 | 0.322  | 0.317 |
| 0.432 | 0.497 | 0.501  | 0.473 | 0.472  | 0.489 |
| 0.528 | 0.532 | 0.535  | 0.469 | 0.536  | 0.529 |
| 0.473 | 0.497 | 0.484  | 0.456 | 0.486  | 0.473 |
| 0.55  | 0.542 | 0.572  | 0.453 | 0.526  | 0.539 |
| 0.573 | 0.604 | 0.618  | 0.628 | 0.6397 | 0.643 |
| 0.719 | 0.691 | 0.736  | 0.677 | 0.632  | 0.742 |
| 0.68  | 0.638 | 0.585  | 0.635 | 0.64   | 0.673 |
| 0.667 | 0.641 | 0.7    | 0.643 | 0.647  | 0.766 |
| 1.187 | 0.92  | 0.911  | 0.874 | 0.747  | 0.992 |
| 1.267 | 1.065 | 1      | 0.9   | 1.014  | 1.121 |
| 1.077 | 1.088 | 0.771  | 0.826 | 0.917  | 0.915 |
| 1.217 | 1.156 | 1.035  | 0.831 | 0.934  | 1     |
| 0.749 | 0.738 | 0.759  | 0.746 | 0.719  | 0.736 |
| 0.863 | 0.823 | 0.729  | 0.745 | 0.75   | 0.788 |
| 0.918 | 0.843 | 0.75   | 0.782 | 0.798  | 0.784 |
| 0.941 | 0.772 | 0.762  | 0.743 | 0.773  | 0.738 |
| 0.044 | 0.051 | 0.0693 | 0.087 | 0.055  | 0.082 |
| 0.075 | 0.108 | 0.064  | 0.083 | 0.067  | 0.11  |
| 0.067 | 0.108 | 0.053  | 0.065 | 0.062  | 0.095 |
| 0.11  | 0.08  | 0.091  | 0.102 | 0.087  | 0.089 |
| 0.26  | 0.248 | 0.248  | 0.254 | 0.262  | 0.239 |
| 0.272 | 0.254 | 0.246  | 0.251 | 0.257  | 0.253 |
| 0.253 | 0.272 | 0.286  | 0.274 | 0.288  | 0.27  |
| 0.265 | 0.281 | 0.278  | 0.278 | 0.282  | 0.27  |
| 0.463 | 0.406 | 0.371  | 0.413 | 0.435  | 0.391 |
| 0.477 | 0.437 | 0.372  | 0.407 | 0.424  | 0.402 |
| 0.436 | 0.454 | 0.422  | 0.436 | 0.46   | 0.434 |

|       |        |       |       |        |       |
|-------|--------|-------|-------|--------|-------|
| 0.471 | 0.473  | 0.427 | 0.446 | 0.46   | 0.425 |
| 0.343 | 0.332  | 0.318 | 0.348 | 0.367  | 0.33  |
| 0.341 | 0.349  | 0.321 | 0.35  | 0.362  | 0.34  |
| 0.324 | 0.352  | 0.33  | 0.382 | 0.396  | 0.366 |
| 0.348 | 0.3443 | 0.351 | 0.37  | 0.39   | 0.346 |
| 0.655 | 0.631  | 0.605 | 0.617 | 0.597  | 0.551 |
| 0.666 | 0.644  | 0.601 | 0.62  | 0.59   | 0.609 |
| 0.658 | 0.644  | 0.639 | 0.66  | 0.639  | 0.634 |
| 0.669 | 0.684  | 0.637 | 0.648 | 0.63   | 0.631 |
| 0.872 | 0.863  | 0.827 | 0.791 | 0.801  | 0.731 |
| 0.745 | 0.892  | 0.839 | 0.972 | 0.817  | 0.836 |
| 0.869 | 0.896  | 0.959 | 0.827 | 0.7823 | 0.802 |
| 0.816 | 0.83   | 0.921 | 0.838 | 0.729  | 0.78  |
| 0.728 | 0.691  | 0.625 | 0.687 | 0.736  | 0.55  |
| 0.669 | 0.723  | 0.628 | 0.665 | 0.728  | 0.662 |
| 0.674 | 0.78   | 0.701 | 0.734 | 0.692  | 0.601 |
| 0.709 | 0.798  | 0.7   | 0.672 | 0.745  | 0.615 |
| 0.501 | 0.723  | 0.763 | 0.8   | 0.686  | 0.547 |
| 0.448 | 0.838  | 0.826 | 0.759 | 0.714  | 0.638 |
| 0.567 | 0.657  | 0.81  | 0.685 | 0.673  | 0.571 |
| 0.475 | 0.785  | 0.848 | 0.675 | 0.721  | 0.61  |
| 0.414 | 0.549  | 0.667 | 0.741 | 0.735  | 0.559 |
| 0.352 | 0.655  | 0.686 | 0.729 | 0.732  | 0.644 |
| 0.406 | 0.498  | 0.622 | 0.676 | 0.659  | 0.59  |
| 0.436 | 0.573  | 0.666 | 0.667 | 0.718  | 0.599 |
| 0.722 | 0.641  | 0.559 | 0.515 | 0.583  | 0.594 |
| 0.746 | 0.639  | 0.56  | 0.527 | 0.58   | 0.625 |
| 0.691 | 0.624  | 0.6   | 0.519 | 0.601  | 0.637 |
| 0.733 | 0.675  | 0.6   | 0.439 | 0.622  | 0.634 |
| 0.643 | 0.655  | 0.609 | 0.637 | 0.625  | 0.599 |
| 0.67  | 0.665  | 0.594 | 0.629 | 0.614  | 0.619 |
| 0.621 | 0.718  | 0.716 | 0.693 | 0.725  | 0.639 |
| 0.653 | 0.718  | 0.659 | 0.676 | 0.699  | 0.645 |
| 0.573 | 0.642  | 0.678 | 0.671 | 0.697  | 0.536 |
| 0.526 | 0.658  | 0.652 | 0.598 | 0.613  | 0.604 |
| 0.581 | 0.619  | 0.616 | 0.628 | 0.629  | 0.641 |
| 0.569 | 0.639  | 0.674 | 0.628 | 0.668  | 0.58  |
| 0.586 | 0.665  | 0.626 | 0.634 | 0.625  | 0.511 |
| 0.619 | 0.654  | 0.615 | 0.596 | 0.603  | 0.546 |

|       |       |        |       |       |       |
|-------|-------|--------|-------|-------|-------|
| 0.642 | 0.66  | 0.763  | 0.665 | 0.741 | 0.634 |
| 0.649 | 0.71  | 0.713  | 0.655 | 0.735 | 0.611 |
| 0.663 | 0.608 | 0.581  | 0.592 | 0.575 | 0.572 |
| 0.659 | 0.628 | 0.58   | 0.589 | 0.569 | 0.606 |
| 0.642 | 0.643 | 0.634  | 0.633 | 0.62  | 0.623 |
| 0.677 | 0.685 | 0.633  | 0.616 | 0.614 | 0.623 |
| 0.183 | 0.186 | 0.188  | 0.188 | 0.205 | 0.18  |
| 0.179 | 0.194 | 0.187  | 0.188 | 0.196 | 0.186 |
| 0.174 | 0.2   | 0.208  | 0.204 | 0.207 | 0.19  |
| 0.185 | 0.215 | 0.211  | 0.191 | 0.207 | 0.186 |
| 0.341 | 0.23  | 0.182  | 0.195 | 0.217 | 0.212 |
| 0.335 | 0.231 | 0.18   | 0.191 | 0.216 | 0.239 |
| 0.324 | 0.27  | 0.222  | 0.198 | 0.217 | 0.222 |
| 0.37  | 0.276 | 0.223  | 0.206 | 0.226 | 0.226 |
| 0.692 | 0.613 | 0.453  | 0.424 | 0.49  | 0.489 |
| 0.698 | 0.546 | 0.433  | 0.43  | 0.493 | 0.522 |
| 0.65  | 0.577 | 0.481  | 0.444 | 0.528 | 0.55  |
| 0.673 | 0.578 | 0.476  | 0.481 | 0.557 | 0.558 |
| 0.511 | 0.336 | 0.334  | 0.261 | 0.29  | 0.32  |
| 0.447 | 0.376 | 0.324  | 0.277 | 0.302 | 0.314 |
| 0.335 | 0.373 | 0.369  | 0.326 | 0.28  | 0.297 |
| 0.339 | 0.421 | 0.397  | 0.319 | 0.288 | 0.311 |
| 0.491 | 0.499 | 0.451  | 0.445 | 0.452 | 0.428 |
| 0.501 | 0.521 | 0.453  | 0.44  | 0.435 | 0.441 |
| 0.495 | 0.517 | 0.481  | 0.464 | 0.483 | 0.469 |
| 0.499 | 0.543 | 0.483  | 0.466 | 0.471 | 0.465 |
| 0.615 | 0.617 | 0.525  | 0.553 | 0.566 | 0.589 |
| 0.597 | 0.618 | 0.531  | 0.557 | 0.567 | 0.599 |
| 0.607 | 0.65  | 0.539  | 0.566 | 0.571 | 0.616 |
| 0.628 | 0.656 | 0.567  | 0.602 | 0.61  | 0.579 |
| 0.769 | 0.699 | 0.653  | 0.571 | 0.587 | 0.51  |
| 0.805 | 0.705 | 0.637  | 0.553 | 0.582 | 0.535 |
| 0.75  | 0.805 | 0.847  | 0.654 | 0.77  | 0.629 |
| 0.834 | 0.861 | 0.798  | 0.643 | 0.692 | 0.596 |
| 0.791 | 0.673 | 0.591  | 0.581 | 0.598 | 0.565 |
| 0.781 | 0.689 | 0.583  | 0.575 | 0.602 | 0.562 |
| 0.793 | 0.693 | 0.618  | 0.584 | 0.64  | 0.571 |
| 0.795 | 0.715 | 0.5973 | 0.572 | 0.623 | 0.553 |
| 0.044 | 0.036 | 0.038  | 0.041 | 0.039 | 0.041 |

|       |       |       |        |       |       |
|-------|-------|-------|--------|-------|-------|
| 0.047 | 0.04  | 0.035 | 0.043  | 0.041 | 0.043 |
| 0.043 | 0.044 | 0.041 | 0.049  | 0.055 | 0.042 |
| 0.042 | 0.04  | 0.038 | 0.0443 | 0.047 | 0.042 |

|       |       |       |       |       |       |
|-------|-------|-------|-------|-------|-------|
| 0.301 | 0.315 | 0.32  | 0.292 | 0.29  | 0.284 |
| 0.274 | 0.306 | 0.309 | 0.293 | 0.284 | 0.292 |
| 0.306 | 0.288 | 0.292 | 0.278 | 0.259 | 0.27  |
| 0.29  | 0.289 | 0.299 | 0.275 | 0.262 | 0.274 |

|       |       |       |       |       |       |
|-------|-------|-------|-------|-------|-------|
| 0.499 | 0.489 | 0.455 | 0.473 | 0.46  | 0.419 |
| 0.46  | 0.464 | 0.431 | 0.462 | 0.459 | 0.453 |
| 0.499 | 0.445 | 0.417 | 0.439 | 0.411 | 0.424 |
| 0.461 | 0.451 | 0.423 | 0.444 | 0.417 | 0.429 |

|        |       |       |       |       |       |
|--------|-------|-------|-------|-------|-------|
| 0.432  | 0.341 | 0.387 | 0.397 | 0.41  | 0.372 |
| 0.429  | 0.365 | 0.376 | 0.402 | 0.405 | 0.389 |
| 0.4253 | 0.386 | 0.389 | 0.389 | 0.354 | 0.384 |
| 0.415  | 0.385 | 0.389 | 0.407 | 0.403 | 0.384 |

|        |       |       |       |       |       |
|--------|-------|-------|-------|-------|-------|
| 0.667  | 0.635 | 0.685 | 0.64  | 0.659 | 0.645 |
| 0.667  | 0.657 | 0.641 | 0.638 | 0.65  | 0.649 |
| 0.6603 | 0.672 | 0.681 | 0.618 | 0.624 | 0.666 |
| 0.647  | 0.65  | 0.656 | 0.625 | 0.636 | 0.644 |

|       |       |       |       |       |       |
|-------|-------|-------|-------|-------|-------|
| 0.734 | 0.672 | 0.657 | 0.758 | 0.637 | 0.578 |
| 0.626 | 0.71  | 0.762 | 0.755 | 0.618 | 0.622 |
| 0.668 | 0.665 | 0.612 | 0.541 | 0.623 | 0.695 |
| 0.599 | 0.582 | 0.552 | 0.573 | 0.566 | 0.557 |

|       |       |       |       |       |       |
|-------|-------|-------|-------|-------|-------|
| 0.601 | 0.609 | 0.663 | 0.623 | 0.577 | 0.537 |
| 0.515 | 0.633 | 0.616 | 0.615 | 0.608 | 0.585 |
| 0.543 | 0.561 | 0.574 | 0.515 | 0.457 | 0.592 |
| 0.561 | 0.558 | 0.569 | 0.561 | 0.525 | 0.51  |

|       |       |       |       |       |       |
|-------|-------|-------|-------|-------|-------|
| 0.412 | 0.532 | 0.729 | 0.615 | 0.563 | 0.448 |
| 0.347 | 0.573 | 0.768 | 0.686 | 0.599 | 0.541 |
| 0.438 | 0.5   | 0.74  | 0.604 | 0.5   | 0.504 |
| 0.351 | 0.545 | 0.718 | 0.635 | 0.546 | 0.523 |

|       |       |       |       |       |        |
|-------|-------|-------|-------|-------|--------|
| 0.274 | 0.496 | 0.809 | 0.785 | 0.687 | 0.592  |
| 0.245 | 0.499 | 0.82  | 0.773 | 0.65  | 0.616  |
| 0.303 | 0.405 | 0.767 | 0.716 | 0.579 | 0.6203 |
| 0.292 | 0.444 | 0.745 | 0.723 | 0.611 | 0.653  |

|       |       |      |      |       |       |
|-------|-------|------|------|-------|-------|
| 0.802 | 0.742 | 0.67 | 0.61 | 0.642 | 0.661 |
|-------|-------|------|------|-------|-------|

|       |        |       |       |       |       |
|-------|--------|-------|-------|-------|-------|
| 0.714 | 0.705  | 0.649 | 0.613 | 0.644 | 0.699 |
| 0.814 | 0.655  | 0.62  | 0.552 | 0.541 | 0.649 |
| 0.74  | 0.624  | 0.579 | 0.566 | 0.593 | 0.624 |
| 0.73  | 0.6387 | 0.703 | 0.699 | 0.733 | 0.648 |
| 0.679 | 0.666  | 0.656 | 0.685 | 0.681 | 0.667 |
| 0.706 | 0.629  | 0.665 | 0.673 | 0.632 | 0.649 |
| 0.678 | 0.621  | 0.665 | 0.697 | 0.658 | 0.637 |
| 0.691 | 0.851  | 0.809 | 0.846 | 0.766 | 0.735 |
| 0.634 | 0.823  | 0.732 | 0.778 | 0.763 | 0.799 |
| 0.726 | 0.745  | 0.695 | 0.73  | 0.683 | 0.788 |
| 0.66  | 0.649  | 0.685 | 0.756 | 0.748 | 0.741 |
| 0.967 | 1.145  | 0.876 | 0.945 | 0.824 | 0.893 |
| 0.609 | 1.12   | 1.014 | 0.906 | 0.912 | 0.933 |
| 0.943 | 0.726  | 0.805 | 0.635 | 0.751 | 0.679 |
| 0.886 | 0.848  | 0.724 | 0.805 | 0.757 | 0.719 |
| 0.802 | 0.738  | 0.701 | 0.624 | 0.656 | 0.658 |
| 0.774 | 0.734  | 0.663 | 0.609 | 0.654 | 0.682 |
| 0.771 | 0.726  | 0.677 | 0.592 | 0.596 | 0.677 |
| 0.768 | 0.68   | 0.654 | 0.598 | 0.632 | 0.673 |
| 0.219 | 0.218  | 0.213 | 0.24  | 0.232 | 0.208 |
| 0.211 | 0.218  | 0.204 | 0.231 | 0.224 | 0.224 |
| 0.195 | 0.224  | 0.207 | 0.229 | 0.224 | 0.226 |
| 0.211 | 0.198  | 0.201 | 0.229 | 0.216 | 0.223 |
| 0.377 | 0.235  | 0.213 | 0.196 | 0.219 | 0.232 |
| 0.341 | 0.22   | 0.201 | 0.195 | 0.232 | 0.253 |
| 0.32  | 0.226  | 0.204 | 0.185 | 0.196 | 0.236 |
| 0.341 | 0.23   | 0.202 | 0.189 | 0.194 | 0.222 |
| 0.863 | 0.575  | 0.49  | 0.46  | 0.51  | 0.524 |
| 0.738 | 0.559  | 0.477 | 0.472 | 0.52  | 0.552 |
| 0.692 | 0.571  | 0.501 | 0.453 | 0.441 | 0.546 |
| 0.744 | 0.568  | 0.451 | 0.449 | 0.46  | 0.507 |
| 0.428 | 0.148  | 0.285 | 0.243 | 0.223 | 0.263 |
| 0.435 | 0.348  | 0.289 | 0.247 | 0.232 | 0.246 |
| 0.145 | 0.281  | 0.308 | 0.295 | 0.318 | 0.276 |
| 0.248 | 0.388  | 0.324 | 0.279 | 0.286 | 0.27  |
| 0.505 | 0.473  | 0.509 | 0.483 | 0.488 | 0.475 |
| 0.476 | 0.482  | 0.494 | 0.48  | 0.488 | 0.49  |
| 0.485 | 0.45   | 0.474 | 0.462 | 0.453 | 0.478 |
| 0.474 | 0.448  | 0.47  | 0.466 | 0.46  | 0.475 |

|       |       |       |        |        |        |
|-------|-------|-------|--------|--------|--------|
| 0.616 | 0.615 | 0.598 | 0.596  | 0.624  | 0.572  |
| 0.592 | 0.622 | 0.6   | 0.599  | 0.62   | 0.573  |
| 0.624 | 0.586 | 0.601 | 0.6    | 0.601  | 0.569  |
| 0.599 | 0.58  | 0.597 | 0.606  | 0.619  | 0.582  |
| 0.976 | 0.922 | 0.74  | 0.614  | 0.5955 | 0.568  |
| 0.847 | 0.892 | 0.719 | 0.612  | 0.5955 | 0.62   |
| 0.9   | 0.86  | 0.705 | 0.602  | 0.585  | 0.617  |
| 0.887 | 0.839 | 0.704 | 0.6    | 0.606  | 0.62   |
| 0.65  | 0.617 | 0.629 | 0.576  | 0.592  | 0.601  |
| 0.601 | 0.635 | 0.634 | 0.588  | 0.593  | 0.612  |
| 0.587 | 0.637 | 0.631 | 0.592  | 0.541  | 0.631  |
| 0.617 | 0.649 | 0.631 | 0.586  | 0.553  | 0.572  |
| 0.085 | 0.091 | 0.078 | 0.068  | 0.068  | 0.062  |
| 0.07  | 0.086 | 0.061 | 0.052  | 0.064  | 0.084  |
| 0.08  | 0.091 | 0.084 | 0.059  | 0.044  | 0.074  |
| 0.078 | 0.081 | 0.066 | 0.062  | 0.052  | 0.07   |
| 0.326 | 0.315 | 0.303 | 0.295  | 0.292  | 0.294  |
| 0.298 | 0.308 | 0.292 | 0.288  | 0.29   | 0.283  |
| 0.3   | 0.287 | 0.28  | 0.264  | 0.257  | 0.273  |
| 0.352 | 0.364 | 0.273 | 0.291  | 0.2797 | 0.2833 |
| 0.284 | 0.269 | 0.273 | 0.253  | 0.255  | 0.255  |
| 0.264 | 0.288 | 0.254 | 0.255  | 0.246  | 0.272  |
| 0.25  | 0.27  | 0.245 | 0.241  | 0.237  | 0.226  |
| 0.267 | 0.251 | 0.239 | 0.234  | 0.246  | 0.249  |
| 0.436 | 0.436 | 0.409 | 0.406  | 0.415  | 0.41   |
| 0.438 | 0.45  | 0.411 | 0.41   | 0.412  | 0.4113 |
| 0.427 | 0.433 | 0.416 | 0.4    | 0.405  | 0.416  |
| 0.422 | 0.422 | 0.397 | 0.416  | 0.416  | 0.408  |
| 0.74  | 0.726 | 0.695 | 0.706  | 0.645  | 0.66   |
| 0.667 | 0.739 | 0.649 | 0.657  | 0.665  | 0.665  |
| 0.699 | 0.712 | 0.696 | 0.694  | 0.666  | 0.721  |
| 0.702 | 0.762 | 0.68  | 0.6857 | 0.774  | 0.742  |
| 0.805 | 0.813 | 0.688 | 0.705  | 0.708  | 0.604  |
| 0.679 | 0.883 | 0.693 | 0.706  | 0.701  | 0.608  |
| 0.903 | 0.791 | 0.902 | 0.798  | 0.833  | 0.785  |
| 0.836 | 0.877 | 0.788 | 0.876  | 0.766  | 0.723  |

|       |       |       |        |       |        |
|-------|-------|-------|--------|-------|--------|
| 0.631 | 0.673 | 0.596 | 0.659  | 0.653 | 0.583  |
| 0.577 | 0.718 | 0.632 | 0.63   | 0.659 | 0.634  |
| 0.749 | 0.819 | 0.8   | 0.761  | 0.696 | 0.629  |
| 0.693 | 0.625 | 0.681 | 0.701  | 0.638 | 0.6153 |
| 0.448 | 0.803 | 0.939 | 0.994  | 0.99  | 0.808  |
| 0.392 | 0.904 | 0.922 | 0.899  | 1.034 | 0.894  |
| 0.386 | 0.748 | 0.966 | 0.825  | 0.911 | 0.778  |
| 0.395 | 0.686 | 0.852 | 0.787  | 0.785 | 0.789  |
| 0.154 | 0.418 | 0.777 | 0.822  | 0.903 | 0.796  |
| 0.154 | 0.469 | 0.785 | 0.814  | 0.873 | 0.801  |
| 0.169 | 0.396 | 0.769 | 0.775  | 0.811 | 0.736  |
| 0.179 | 0.321 | 0.672 | 0.718  | 0.676 | 0.57   |
| 1.036 | 0.837 | 0.714 | 0.688  | 0.681 | 0.699  |
| 0.951 | 0.839 | 0.755 | 0.699  | 0.701 | 0.728  |
| 0.904 | 0.747 | 0.638 | 0.608  | 0.628 | 0.643  |
| 0.935 | 0.83  | 0.65  | 0.639  | 0.62  | 0.76   |
| 0.767 | 0.744 | 0.726 | 0.734  | 0.794 | 0.747  |
| 0.759 | 0.771 | 0.727 | 0.723  | 0.775 | 0.771  |
| 0.756 | 0.707 | 0.697 | 0.684  | 0.762 | 0.701  |
| 0.722 | 0.74  | 0.702 | 0.649  | 0.725 | 0.718  |
| 0.57  | 0.522 | 0.563 | 0.565  | 0.58  | 0.533  |
| 0.545 | 0.552 | 0.568 | 0.562  | 0.592 | 0.545  |
| 0.71  | 0.755 | 0.685 | 0.696  | 0.766 | 0.794  |
| 0.757 | 0.701 | 0.755 | 0.798  | 0.797 | 0.726  |
| 0.528 | 0.481 | 0.523 | 0.485  | 0.515 | 0.466  |
| 0.492 | 0.512 | 0.469 | 0.478  | 0.51  | 0.443  |
| 0.479 | 0.495 | 0.479 | 0.462  | 0.482 | 0.477  |
| 0.598 | 0.496 | 0.521 | 0.559  | 0.616 | 0.646  |
| 0.945 | 0.909 | 0.825 | 0.855  | 0.79  | 0.833  |
| 0.893 | 0.945 | 0.854 | 0.853  | 0.805 | 0.802  |
| 0.933 | 0.953 | 0.91  | 0.89   | 0.802 | 0.888  |
| 0.972 | 0.963 | 0.807 | 0.857  | 0.775 | 0.924  |
| 0.207 | 0.242 | 0.267 | 0.26   | 0.249 | 0.248  |
| 0.198 | 0.258 | 0.264 | 0.253  | 0.252 | 0.249  |
| 0.205 | 0.256 | 0.262 | 0.267  | 0.252 | 0.261  |
| 0.22  | 0.24  | 0.251 | 0.255  | 0.243 | 0.237  |
| 1.191 | 0.417 | 0.29  | 0.263  | 0.288 | 0.311  |
| 1.021 | 0.454 | 0.3   | 0.2867 | 0.287 | 0.314  |
| 1.006 | 0.447 | 0.337 | 0.291  | 0.3   | 0.303  |
| 1.134 | 0.587 | 0.302 | 0.306  | 0.335 | 0.368  |

|       |        |       |       |       |        |
|-------|--------|-------|-------|-------|--------|
| 1.131 | 0.822  | 0.607 | 0.59  | 0.563 | 0.66   |
| 0.989 | 0.859  | 0.605 | 0.595 | 0.604 | 0.664  |
| 1.043 | 0.828  | 0.615 | 0.556 | 0.577 | 0.687  |
| 1.063 | 0.846  | 0.624 | 0.609 | 0.576 | 0.698  |
| 0.473 | 0.636  | 0.382 | 0.339 | 0.332 | 0.296  |
| 0.584 | 0.551  | 0.455 | 0.334 | 0.343 | 0.316  |
| 0.671 | 0.64   | 0.366 | 0.349 | 0.37  | 0.374  |
| 0.659 | 0.7    | 0.431 | 0.406 | 0.376 | 0.376  |
| 0.5   | 0.496  | 0.454 | 0.482 | 0.471 | 0.491  |
| 0.454 | 0.506  | 0.449 | 0.51  | 0.468 | 0.474  |
| 0.432 | 0.454  | 0.416 | 0.456 | 0.466 | 0.449  |
| 0.462 | 0.5    | 0.425 | 0.48  | 0.453 | 0.508  |
| 0.648 | 0.596  | 0.598 | 0.594 | 0.617 | 0.623  |
| 0.64  | 0.569  | 0.568 | 0.586 | 0.611 | 0.62   |
| 0.614 | 0.594  | 0.573 | 0.575 | 0.591 | 0.631  |
| 0.68  | 0.68   | 0.605 | 0.62  | 0.647 | 0.6247 |
| 1.144 | 1.112  | 0.913 | 0.922 | 0.912 | 0.925  |
| 1.008 | 1.153  | 0.887 | 0.886 | 0.894 | 0.909  |
| 0.909 | 0.954  | 0.847 | 0.789 | 0.774 | 0.769  |
| 0.936 | 1.005  | 0.844 | 0.797 | 0.804 | 0.868  |
| 0.931 | 0.812  | 0.769 | 0.746 | 0.763 | 0.73   |
| 0.924 | 0.851  | 0.773 | 0.756 | 0.786 | 0.784  |
| 0.953 | 0.845  | 0.828 | 0.772 | 0.809 | 0.76   |
| 1.089 | 0.928  | 0.778 | 0.816 | 0.786 | 0.864  |
| 0.079 | 0.1    | 0.074 | 0.065 | 0.066 | 0.081  |
| 0.065 | 0.104  | 0.069 | 0.058 | 0.065 | 0.074  |
| 0.063 | 0.091  | 0.072 | 0.072 | 0.073 | 0.076  |
| 0.083 | 0.0983 | 0.066 | 0.076 | 0.068 | 0.077  |
| 0.34  | 0.318  | 0.321 | 0.31  | 0.319 | 0.337  |
| 0.336 | 0.305  | 0.301 | 0.308 | 0.329 | 0.335  |
| 0.341 | 0.315  | 0.304 | 0.302 | 0.279 | 0.333  |
| 0.316 | 0.288  | 0.286 | 0.281 | 0.288 | 0.305  |
| 0.268 | 0.282  | 0.284 | 0.255 | 0.257 | 0.263  |
| 0.301 | 0.274  | 0.254 | 0.264 | 0.297 | 0.271  |
| 0.296 | 0.276  | 0.268 | 0.277 | 0.248 | 0.274  |
| 0.26  | 0.256  | 0.253 | 0.245 | 0.24  | 0.245  |

|       |       |       |        |        |        |
|-------|-------|-------|--------|--------|--------|
| 0.387 | 0.385 | 0.384 | 0.366  | 0.402  | 0.372  |
| 0.455 | 0.429 | 0.41  | 0.416  | 0.453  | 0.417  |
| 0.416 | 0.41  | 0.382 | 0.375  | 0.383  | 0.395  |
| 0.438 | 0.431 | 0.436 | 0.473  | 0.428  | 0.416  |
| 0.657 | 0.689 | 0.637 | 0.654  | 0.687  | 0.678  |
| 0.664 | 0.681 | 0.653 | 0.669  | 0.687  | 0.668  |
| 0.64  | 0.66  | 0.611 | 0.626  | 0.599  | 0.636  |
| 0.667 | 0.698 | 0.688 | 0.728  | 0.684  | 0.72   |
| 0.643 | 0.683 | 0.729 | 0.629  | 0.62   | 0.583  |
| 0.745 | 0.836 | 0.729 | 0.732  | 0.662  | 0.671  |
| 0.632 | 0.662 | 0.634 | 0.59   | 0.63   | 0.68   |
| 0.757 | 0.866 | 0.819 | 0.782  | 0.776  | 0.727  |
| 0.546 | 0.551 | 0.579 | 0.539  | 0.529  | 0.502  |
| 0.696 | 0.699 | 0.593 | 0.674  | 0.605  | 0.604  |
| 0.702 | 0.738 | 0.554 | 0.607  | 0.586  | 0.69   |
| 0.906 | 0.878 | 0.862 | 0.893  | 0.84   | 0.71   |
| 0.411 | 0.669 | 0.853 | 0.762  | 0.699  | 0.621  |
| 0.461 | 0.865 | 0.825 | 0.901  | 0.807  | 0.773  |
| 0.456 | 0.732 | 0.808 | 0.821  | 0.64   | 0.653  |
| 0.41  | 0.725 | 0.919 | 0.801  | 0.845  | 0.666  |
| 0.193 | 0.506 | 0.744 | 0.808  | 0.82   | 0.75   |
| 0.215 | 0.551 | 0.724 | 0.877  | 0.864  | 0.783  |
| 0.161 | 0.453 | 0.693 | 0.754  | 0.69   | 0.628  |
| 0.223 | 0.46  | 0.724 | 0.811  | 0.782  | 0.677  |
| 1.043 | 0.841 | 0.749 | 0.704  | 0.7    | 0.6997 |
| 1.01  | 0.821 | 0.707 | 0.71   | 0.685  | 0.731  |
| 1.101 | 0.897 | 0.748 | 0.762  | 0.693  | 0.731  |
| 0.864 | 0.736 | 0.684 | 0.7253 | 0.623  | 0.637  |
| 0.826 | 0.812 | 0.764 | 0.799  | 0.802  | 0.808  |
| 0.797 | 0.791 | 0.715 | 0.785  | 0.794  | 0.795  |
| 0.762 | 0.79  | 0.719 | 0.737  | 0.733  | 0.796  |
| 0.746 | 0.764 | 0.71  | 0.739  | 0.733  | 0.778  |
| 0.606 | 0.568 | 0.598 | 0.612  | 0.592  | 0.636  |
| 0.658 | 0.599 | 0.609 | 0.649  | 0.646  | 0.657  |
| 0.612 | 0.596 | 0.587 | 0.617  | 0.6183 | 0.641  |
| 0.632 | 0.644 | 0.65  | 0.626  | 0.617  | 0.6447 |
| 0.631 | 0.592 | 0.579 | 0.608  | 0.621  | 0.617  |
| 0.596 | 0.543 | 0.522 | 0.544  | 0.58   | 0.555  |
| 0.59  | 0.577 | 0.511 | 0.527  | 0.466  | 0.566  |

|        |       |        |       |       |       |
|--------|-------|--------|-------|-------|-------|
| 0.518  | 0.484 | 0.475  | 0.473 | 0.465 | 0.485 |
| 0.85   | 0.903 | 0.813  | 0.801 | 0.815 | 0.824 |
| 0.968  | 0.991 | 0.879  | 0.901 | 0.902 | 0.925 |
| 0.851  | 0.865 | 0.725  | 0.819 | 0.707 | 0.859 |
| 0.892  | 0.929 | 0.836  | 0.946 | 0.844 | 0.976 |
| 0.195  | 0.256 | 0.266  | 0.259 | 0.269 | 0.282 |
| 0.225  | 0.279 | 0.252  | 0.282 | 0.29  | 0.308 |
| 0.207  | 0.267 | 0.251  | 0.258 | 0.237 | 0.277 |
| 0.226  | 0.283 | 0.282  | 0.306 | 0.277 | 0.308 |
| 0.717  | 0.359 | 0.253  | 0.237 | 0.249 | 0.259 |
| 0.842  | 0.422 | 0.268  | 0.262 | 0.28  | 0.294 |
| 0.794  | 0.404 | 0.24   | 0.247 | 0.24  | 0.285 |
| 0.7    | 0.419 | 0.285  | 0.296 | 0.288 | 0.32  |
| 0.883  | 0.757 | 0.591  | 0.573 | 0.549 | 0.614 |
| 1.052  | 0.848 | 0.626  | 0.636 | 0.652 | 0.707 |
| 0.95   | 0.762 | 0.542  | 0.554 | 0.496 | 0.623 |
| 0.9617 | 0.836 | 0.626  | 0.665 | 0.636 | 0.715 |
| 0.632  | 0.679 | 0.429  | 0.332 | 0.352 | 0.308 |
| 0.683  | 0.71  | 0.552  | 0.401 | 0.354 | 0.355 |
| 0.704  | 0.657 | 0.362  | 0.386 | 0.385 | 0.34  |
| 0.702  | 0.815 | 0.344  | 0.39  | 0.431 | 0.393 |
| 0.469  | 0.473 | 0.5007 | 0.512 | 0.499 | 0.521 |
| 0.481  | 0.466 | 0.5    | 0.474 | 0.469 | 0.491 |
| 0.499  | 0.501 | 0.515  | 0.486 | 0.453 | 0.5   |
| 0.493  | 0.485 | 0.487  | 0.482 | 0.473 | 0.461 |
| 0.625  | 0.623 | 0.612  | 0.622 | 0.605 | 0.58  |
| 0.633  | 0.623 | 0.601  | 0.64  | 0.634 | 0.604 |
| 0.627  | 0.649 | 0.599  | 0.647 | 0.588 | 0.652 |
| 0.623  | 0.614 | 0.598  | 0.613 | 0.601 | 0.598 |
| 1.334  | 0.987 | 1.055  | 0.972 | 1.006 | 0.97  |
| 1.324  | 1.177 | 1.027  | 0.935 | 1.001 | 0.975 |
| 1.345  | 1.176 | 0.974  | 0.936 | 0.848 | 0.968 |
| 1.128  | 0.956 | 0.905  | 0.849 | 0.827 | 0.885 |
| 0.785  | 0.752 | 0.658  | 0.719 | 0.704 | 0.679 |
| 0.862  | 0.845 | 0.706  | 0.778 | 0.767 | 0.755 |
| 0.824  | 0.819 | 0.696  | 0.77  | 0.729 | 0.719 |
| 0.826  | 0.843 | 0.75   | 0.803 | 0.777 | 0.775 |
| 0.085  | 0.101 | 0.097  | 0.074 | 0.076 | 0.082 |
| 0.11   | 0.121 | 0.093  | 0.09  | 0.09  | 0.099 |

|        |       |        |        |        |       |
|--------|-------|--------|--------|--------|-------|
| 0.088  | 0.107 | 0.065  | 0.071  | 0.065  | 0.08  |
| 0.084  | 0.09  | 0.09   | 0.085  | 0.091  | 0.074 |
| 0.252  | 0.228 | 0.199  | 0.253  | 0.216  | 0.296 |
| 0.194  | 0.226 | 0.274  | 0.274  | 0.262  | 0.295 |
| 0.232  | 0.233 | 0.256  | 0.246  | 0.2473 | 0.256 |
| 0.258  | 0.262 | 0.246  | 0.248  | 0.264  | 0.3   |
| 0.487  | 0.403 | 0.364  | 0.437  | 0.391  | 0.471 |
| 0.375  | 0.419 | 0.398  | 0.464  | 0.463  | 0.489 |
| 0.439  | 0.408 | 0.443  | 0.43   | 0.435  | 0.43  |
| 0.466  | 0.41  | 0.433  | 0.432  | 0.451  | 0.442 |
| 0.336  | 0.298 | 0.261  | 0.329  | 0.284  | 0.361 |
| 0.258  | 0.318 | 0.299  | 0.361  | 0.343  | 0.402 |
| 0.306  | 0.301 | 0.335  | 0.335  | 0.3197 | 0.33  |
| 0.301  | 0.278 | 0.355  | 0.33   | 0.332  | 0.32  |
| 0.537  | 0.473 | 0.46   | 0.547  | 0.573  | 0.578 |
| 0.425  | 0.489 | 0.518  | 0.579  | 0.566  | 0.576 |
| 0.493  | 0.494 | 0.542  | 0.542  | 0.573  | 0.576 |
| 0.565  | 0.498 | 0.552  | 0.583  | 0.58   | 0.574 |
| 0.698  | 0.552 | 0.443  | 0.608  | 0.6205 | 0.676 |
| 0.6253 | 0.597 | 0.496  | 0.683  | 0.618  | 0.711 |
| 0.603  | 0.627 | 0.678  | 0.638  | 0.6205 | 0.631 |
| 0.575  | 0.537 | 0.668  | 0.606  | 0.623  | 0.595 |
| 0.731  | 0.568 | 0.638  | 0.692  | 0.485  | 0.567 |
| 0.369  | 0.638 | 0.7163 | 0.644  | 0.703  | 0.65  |
| 0.781  | 0.83  | 0.738  | 0.726  | 0.508  | 0.698 |
| 0.604  | 0.56  | 0.773  | 0.684  | 0.582  | 0.606 |
| 0.447  | 0.496 | 0.418  | 0.771  | 0.451  | 0.671 |
| 0.184  | 0.527 | 0.533  | 0.798  | 0.669  | 0.71  |
| 0.314  | 0.498 | 0.759  | 0.721  | 0.424  | 0.553 |
| 0.306  | 0.424 | 0.76   | 0.635  | 0.571  | 0.543 |
| 0.205  | 0.286 | 0.265  | 0.503  | 0.364  | 0.508 |
| 0.11   | 0.264 | 0.214  | 0.542  | 0.56   | 0.547 |
| 0.151  | 0.269 | 0.458  | 0.443  | 0.315  | 0.441 |
| 0.17   | 0.21  | 0.454  | 0.381  | 0.359  | 0.34  |
| 0.828  | 0.576 | 0.5813 | 0.625  | 0.512  | 0.69  |
| 0.475  | 0.606 | 0.566  | 0.5787 | 0.591  | 0.708 |

|        |       |        |       |        |       |
|--------|-------|--------|-------|--------|-------|
| 0.647  | 0.538 | 0.589  | 0.55  | 0.5563 | 0.544 |
| 0.655  | 0.568 | 0.589  | 0.561 | 0.566  | 0.632 |
| 0.698  | 0.642 | 0.602  | 0.678 | 0.623  | 0.706 |
| 0.581  | 0.651 | 0.578  | 0.709 | 0.698  | 0.732 |
| 0.643  | 0.641 | 0.682  | 0.661 | 0.589  | 0.662 |
| 0.642  | 0.58  | 0.682  | 0.668 | 0.666  | 0.632 |
| 0.443  | 0.406 | 0.492  | 0.505 | 0.389  | 0.546 |
| 0.353  | 0.441 | 0.48   | 0.565 | 0.501  | 0.575 |
| 0.537  | 0.578 | 0.459  | 0.623 | 0.465  | 0.651 |
| 0.571  | 0.528 | 0.466  | 0.696 | 0.652  | 0.633 |
| 0.368  | 0.305 | 0.255  | 0.369 | 0.282  | 0.395 |
| 0.257  | 0.314 | 0.402  | 0.403 | 0.375  | 0.411 |
| 0.307  | 0.33  | 0.367  | 0.353 | 0.3597 | 0.363 |
| 0.381  | 0.35  | 0.347  | 0.418 | 0.422  | 0.44  |
| 0.636  | 0.539 | 0.47   | 0.644 | 0.6455 | 0.671 |
| 0.5883 | 0.586 | 0.545  | 0.683 | 0.661  | 0.653 |
| 0.554  | 0.6   | 0.607  | 0.662 | 0.6455 | 0.644 |
| 0.575  | 0.534 | 0.631  | 0.645 | 0.63   | 0.644 |
| 0.161  | 0.153 | 0.144  | 0.183 | 0.15   | 0.203 |
| 0.1553 | 0.161 | 0.144  | 0.2   | 0.19   | 0.233 |
| 0.151  | 0.166 | 0.174  | 0.198 | 0.1753 | 0.187 |
| 0.154  | 0.146 | 0.176  | 0.19  | 0.186  | 0.174 |
| 0.435  | 0.185 | 0.147  | 0.186 | 0.15   | 0.22  |
| 0.179  | 0.22  | 0.18   | 0.204 | 0.202  | 0.231 |
| 0.371  | 0.233 | 0.17   | 0.22  | 0.156  | 0.198 |
| 0.389  | 0.23  | 0.186  | 0.204 | 0.249  | 0.233 |
| 0.71   | 0.409 | 0.4387 | 0.466 | 0.384  | 0.483 |
| 0.348  | 0.464 | 0.418  | 0.492 | 0.498  | 0.525 |
| 0.62   | 0.478 | 0.442  | 0.462 | 0.448  | 0.436 |
| 0.644  | 0.468 | 0.456  | 0.436 | 0.462  | 0.467 |
| 1.052  | 0.782 | 0.818  | 0.496 | 0.55   | 0.509 |
| 1.139  | 0.813 | 0.795  | 0.477 | 0.5    | 0.481 |
| 0.779  | 0.893 | 0.473  | 0.489 | 0.503  | 0.463 |
| 0.913  | 1.073 | 0.344  | 0.52  | 0.54   | 0.547 |
| 0.402  | 0.382 | 0.341  | 0.43  | 0.367  | 0.387 |
| 0.328  | 0.378 | 0.422  | 0.449 | 0.412  | 0.398 |
| 0.367  | 0.363 | 0.404  | 0.411 | 0.333  | 0.352 |
| 0.381  | 0.391 | 0.403  | 0.428 | 0.405  | 0.394 |
| 0.537  | 0.536 | 0.519  | 0.521 | 0.49   | 0.587 |

|        |        |        |        |        |        |
|--------|--------|--------|--------|--------|--------|
| 0.5163 | 0.504  | 0.519  | 0.546  | 0.537  | 0.539  |
| 0.482  | 0.522  | 0.519  | 0.515  | 0.447  | 0.51   |
| 0.53   | 0.5207 | 0.519  | 0.53   | 0.571  | 0.577  |
| 0.816  | 0.683  | 0.623  | 0.706  | 0.563  | 0.68   |
| 0.431  | 0.704  | 0.517  | 0.723  | 0.718  | 0.702  |
| 0.583  | 0.65   | 0.692  | 0.617  | 0.455  | 0.557  |
| 0.617  | 0.599  | 0.66   | 0.61   | 0.636  | 0.579  |
| 0.831  | 0.695  | 0.6947 | 0.698  | 0.674  | 0.749  |
| 0.64   | 0.746  | 0.7    | 0.771  | 0.786  | 0.774  |
| 0.697  | 0.672  | 0.682  | 0.674  | 0.561  | 0.651  |
| 0.807  | 0.73   | 0.702  | 0.702  | 0.77   | 0.754  |
| 0.034  | 0.031  | 0.025  | 0.041  | 0.028  | 0.047  |
| 0.019  | 0.037  | 0.0367 | 0.051  | 0.05   | 0.061  |
| 0.03   | 0.038  | 0.042  | 0.046  | 0.027  | 0.041  |
| 0.031  | 0.0353 | 0.043  | 0.035  | 0.043  | 0.0497 |
| 0.326  | 0.319  | 0.302  | 0.317  | 0.309  | 0.317  |
| 0.322  | 0.337  | 0.311  | 0.313  | 0.311  | 0.324  |
| 0.322  | 0.334  | 0.314  | 0.309  | 0.317  | 0.316  |
| 0.3233 | 0.305  | 0.317  | 0.313  | 0.3123 | 0.319  |
| 0.568  | 0.555  | 0.568  | 0.509  | 0.484  | 0.544  |
| 0.578  | 0.577  | 0.529  | 0.484  | 0.503  | 0.56   |
| 0.581  | 0.582  | 0.531  | 0.533  | 0.52   | 0.569  |
| 0.535  | 0.535  | 0.537  | 0.5087 | 0.5    | 0.526  |
| 0.382  | 0.382  | 0.416  | 0.394  | 0.359  | 0.383  |
| 0.431  | 0.43   | 0.428  | 0.437  | 0.394  | 0.431  |
| 0.414  | 0.414  | 0.386  | 0.409  | 0.377  | 0.41   |
| 0.418  | 0.431  | 0.426  | 0.429  | 0.402  | 0.412  |
| 0.609  | 0.587  | 0.603  | 0.6    | 0.603  | 0.632  |
| 0.659  | 0.637  | 0.642  | 0.659  | 0.625  | 0.683  |
| 0.634  | 0.641  | 0.603  | 0.621  | 0.625  | 0.628  |
| 0.676  | 0.678  | 0.615  | 0.66   | 0.673  | 0.646  |
| 0.619  | 0.651  | 0.732  | 0.615  | 0.54   | 0.521  |
| 0.64   | 0.731  | 0.746  | 0.741  | 0.775  | 0.606  |
| 0.65   | 0.706  | 0.602  | 0.626  | 0.7    | 0.719  |
| 0.781  | 0.875  | 0.659  | 0.836  | 0.756  | 0.692  |
| 0.55   | 0.524  | 0.743  | 0.527  | 0.472  | 0.479  |

|       |       |       |       |       |       |
|-------|-------|-------|-------|-------|-------|
| 0.642 | 0.662 | 0.814 | 0.663 | 0.595 | 0.63  |
| 0.645 | 0.714 | 0.515 | 0.616 | 0.592 | 0.694 |
| 0.931 | 0.878 | 0.604 | 0.866 | 0.815 | 0.752 |
| 0.436 | 0.664 | 0.785 | 0.79  | 0.663 | 0.58  |
| 0.453 | 0.82  | 0.799 | 0.899 | 0.833 | 0.802 |
| 0.448 | 0.782 | 0.759 | 0.881 | 0.76  | 0.658 |
| 0.458 | 0.755 | 0.794 | 0.9   | 0.855 | 0.713 |
| 0.199 | 0.469 | 0.671 | 0.841 | 0.714 | 0.689 |
| 0.208 | 0.505 | 0.637 | 0.899 | 0.815 | 0.806 |
| 0.175 | 0.447 | 0.745 | 0.804 | 0.698 | 0.654 |
| 0.21  | 0.417 | 0.779 | 0.81  | 0.771 | 0.646 |
| 1.078 | 0.843 | 0.755 | 0.66  | 0.698 | 0.658 |
| 1.02  | 0.828 | 0.636 | 0.655 | 0.694 | 0.678 |
| 1.094 | 0.848 | 0.704 | 0.704 | 0.719 | 0.69  |
| 0.903 | 0.715 | 0.711 | 0.599 | 0.608 | 0.576 |
| 0.838 | 0.819 | 0.789 | 0.775 | 0.767 | 0.773 |
| 0.8   | 0.793 | 0.752 | 0.764 | 0.749 | 0.772 |
| 0.804 | 0.795 | 0.794 | 0.741 | 0.726 | 0.764 |
| 0.771 | 0.768 | 0.764 | 0.729 | 0.729 | 0.736 |
| 0.599 | 0.611 | 0.643 | 0.644 | 0.602 | 0.589 |
| 0.615 | 0.652 | 0.679 | 0.688 | 0.635 | 0.646 |
| 0.627 | 0.647 | 0.594 | 0.663 | 0.625 | 0.63  |
| 0.623 | 0.664 | 0.623 | 0.699 | 0.657 | 0.64  |
| 0.576 | 0.562 | 0.572 | 0.563 | 0.58  | 0.525 |
| 0.546 | 0.537 | 0.466 | 0.541 | 0.536 | 0.506 |
| 0.548 | 0.563 | 0.599 | 0.543 | 0.591 | 0.559 |
| 0.484 | 0.517 | 0.524 | 0.482 | 0.523 | 0.453 |
| 0.827 | 0.85  | 0.768 | 0.736 | 0.749 | 0.778 |
| 0.925 | 0.898 | 0.843 | 0.838 | 0.753 | 0.875 |
| 0.823 | 0.929 | 0.737 | 0.773 | 0.791 | 0.836 |
| 0.858 | 0.936 | 0.855 | 0.788 | 0.796 | 0.828 |
| 0.209 | 0.255 | 0.271 | 0.247 | 0.257 | 0.251 |
| 0.211 | 0.274 | 0.257 | 0.272 | 0.243 | 0.277 |
| 0.217 | 0.268 | 0.249 | 0.259 | 0.266 | 0.264 |
| 0.235 | 0.284 | 0.276 | 0.28  | 0.274 | 0.251 |
| 0.668 | 0.346 | 0.264 | 0.229 | 0.233 | 0.232 |
| 0.693 | 0.406 | 0.27  | 0.257 | 0.268 | 0.289 |
| 0.761 | 0.407 | 0.242 | 0.249 | 0.26  | 0.257 |
| 0.709 | 0.394 | 0.272 | 0.264 | 0.284 | 0.288 |

|        |       |       |        |       |       |
|--------|-------|-------|--------|-------|-------|
| 0.857  | 0.743 | 0.532 | 0.502  | 0.542 | 0.519 |
| 0.907  | 0.807 | 0.573 | 0.593  | 0.605 | 0.633 |
| 0.918  | 0.782 | 0.502 | 0.52   | 0.554 | 0.556 |
| 0.894  | 0.81  | 0.578 | 0.582  | 0.642 | 0.621 |
| 0.709  | 0.507 | 0.478 | 0.364  | 0.382 | 0.391 |
| 0.848  | 0.594 | 0.524 | 0.402  | 0.438 | 0.444 |
| 0.559  | 0.678 | 0.126 | 0.363  | 0.346 | 0.323 |
| 0.648  | 0.726 | 0.338 | 0.3763 | 0.416 | 0.411 |
| 0.471  | 0.471 | 0.485 | 0.489  | 0.449 | 0.456 |
| 0.465  | 0.478 | 0.448 | 0.465  | 0.45  | 0.468 |
| 0.466  | 0.481 | 0.481 | 0.474  | 0.459 | 0.472 |
| 0.436  | 0.478 | 0.462 | 0.435  | 0.434 | 0.469 |
| 0.648  | 0.62  | 0.626 | 0.606  | 0.599 | 0.612 |
| 0.651  | 0.642 | 0.597 | 0.632  | 0.586 | 0.63  |
| 0.653  | 0.64  | 0.575 | 0.628  | 0.628 | 0.642 |
| 0.594  | 0.613 | 0.589 | 0.583  | 0.599 | 0.614 |
| 1.229  | 1.259 | 0.924 | 0.945  | 0.983 | 0.912 |
| 1.146  | 1.208 | 0.781 | 0.911  | 0.92  | 0.992 |
| 1.202  | 1.223 | 0.907 | 0.968  | 0.991 | 0.961 |
| 0.974  | 1.034 | 0.884 | 0.828  | 0.868 | 0.852 |
| 0.714  | 0.715 | 0.697 | 0.688  | 0.682 | 0.694 |
| 0.779  | 0.798 | 0.693 | 0.75   | 0.754 | 0.779 |
| 0.758  | 0.758 | 0.644 | 0.738  | 0.724 | 0.741 |
| 0.794  | 0.784 | 0.711 | 0.753  | 0.758 | 0.77  |
| 0.075  | 0.094 | 0.084 | 0.066  | 0.056 | 0.071 |
| 0.092  | 0.122 | 0.077 | 0.078  | 0.071 | 0.09  |
| 0.087  | 0.122 | 0.068 | 0.072  | 0.07  | 0.078 |
| 0.089  | 0.103 | 0.082 | 0.091  | 0.096 | 0.093 |
| 0.197  | 0.308 | 0.296 | 0.297  | 0.286 | 0.31  |
| 0.274  | 0.318 | 0.297 | 0.295  | 0.281 | 0.304 |
| 0.294  | 0.319 | 0.299 | 0.301  | 0.287 | 0.3   |
| 0.286  | 0.312 | 0.297 | 0.292  | 0.287 | 0.307 |
| 0.446  | 0.436 | 0.439 | 0.427  | 0.422 | 0.418 |
| 0.452  | 0.45  | 0.452 | 0.437  | 0.424 | 0.409 |
| 0.4567 | 0.447 | 0.429 | 0.446  | 0.445 | 0.405 |
| 0.472  | 0.442 | 0.44  | 0.453  | 0.436 | 0.41  |

|       |       |       |       |       |       |
|-------|-------|-------|-------|-------|-------|
| 0.371 | 0.365 | 0.381 | 0.372 | 0.382 | 0.376 |
| 0.379 | 0.373 | 0.381 | 0.377 | 0.386 | 0.39  |
| 0.411 | 0.371 | 0.365 | 0.351 | 0.367 | 0.362 |
| 0.379 | 0.377 | 0.389 | 0.37  | 0.364 | 0.357 |
| 0.686 | 0.736 | 0.708 | 0.709 | 0.725 | 0.728 |
| 0.649 | 0.771 | 0.73  | 0.722 | 0.73  | 0.729 |
| 0.698 | 0.735 | 0.69  | 0.671 | 0.693 | 0.704 |
| 0.639 | 0.744 | 0.731 | 0.703 | 0.692 | 0.679 |
| 0.628 | 0.738 | 0.754 | 0.651 | 0.676 | 0.656 |
| 0.581 | 0.828 | 0.762 | 0.725 | 0.676 | 0.668 |
| 0.726 | 0.609 | 0.614 | 0.534 | 0.565 | 0.565 |
| 0.687 | 0.75  | 0.787 | 0.559 | 0.597 | 0.672 |
| 0.46  | 0.474 | 0.49  | 0.465 | 0.498 | 0.484 |
| 0.505 | 0.537 | 0.534 | 0.505 | 0.471 | 0.471 |
| 0.515 | 0.431 | 0.533 | 0.515 | 0.515 | 0.534 |
| 0.527 | 0.466 | 0.475 | 0.528 | 0.519 | 0.535 |
| 0.565 | 0.742 | 0.815 | 0.746 | 0.703 | 0.76  |
| 0.456 | 0.836 | 0.868 | 0.771 | 0.676 | 0.714 |
| 0.622 | 0.671 | 0.687 | 0.615 | 0.549 | 0.749 |
| 0.512 | 0.688 | 0.806 | 0.695 | 0.637 | 0.749 |
| 0.24  | 0.462 | 0.695 | 0.727 | 0.764 | 0.782 |
| 0.267 | 0.522 | 0.757 | 0.733 | 0.712 | 0.713 |
| 0.327 | 0.442 | 0.66  | 0.662 | 0.732 | 0.696 |
| 0.258 | 0.448 | 0.695 | 0.688 | 0.72  | 0.72  |
| 0.937 | 0.8   | 0.743 | 0.7   | 0.736 | 0.738 |
| 0.982 | 0.847 | 0.735 | 0.713 | 0.729 | 0.71  |
| 1.065 | 0.771 | 0.689 | 0.689 | 0.698 | 0.694 |
| 1.026 | 0.818 | 0.712 | 0.657 | 0.674 | 0.713 |
| 0.62  | 0.665 | 0.655 | 0.656 | 0.628 | 0.639 |
| 0.621 | 0.678 | 0.667 | 0.665 | 0.635 | 0.635 |
| 0.669 | 0.636 | 0.613 | 0.621 | 0.582 | 0.583 |
| 0.66  | 0.626 | 0.631 | 0.618 | 0.578 | 0.592 |
| 0.657 | 0.664 | 0.772 | 0.721 | 0.745 | 0.729 |
| 0.654 | 0.73  | 0.734 | 0.713 | 0.721 | 0.737 |
| 0.701 | 0.64  | 0.666 | 0.624 | 0.649 | 0.679 |
| 0.712 | 0.669 | 0.785 | 0.591 | 0.702 | 0.691 |
| 0.54  | 0.569 | 0.578 | 0.526 | 0.554 | 0.485 |
| 0.538 | 0.585 | 0.585 | 0.565 | 0.608 | 0.532 |
| 0.68  | 0.466 | 0.549 | 0.499 | 0.462 | 0.443 |
| 0.509 | 0.477 | 0.524 | 0.444 | 0.479 | 0.491 |

|        |       |        |        |        |        |
|--------|-------|--------|--------|--------|--------|
| 0.822  | 0.813 | 0.75   | 0.749  | 0.781  | 0.825  |
| 0.869  | 0.849 | 0.767  | 0.77   | 0.796  | 0.821  |
| 0.836  | 0.83  | 0.746  | 0.718  | 0.754  | 0.786  |
| 0.839  | 0.854 | 0.853  | 0.742  | 0.833  | 0.783  |
| 0.198  | 0.208 | 0.222  | 0.217  | 0.221  | 0.219  |
| 0.189  | 0.221 | 0.228  | 0.221  | 0.222  | 0.22   |
| 0.216  | 0.213 | 0.214  | 0.205  | 0.208  | 0.2197 |
| 0.202  | 0.232 | 0.2213 | 0.204  | 0.231  | 0.22   |
| 0.49   | 0.334 | 0.233  | 0.225  | 0.232  | 0.263  |
| 0.452  | 0.359 | 0.237  | 0.226  | 0.227  | 0.241  |
| 0.514  | 0.349 | 0.22   | 0.208  | 0.207  | 0.242  |
| 0.511  | 0.354 | 0.243  | 0.224  | 0.22   | 0.227  |
| 0.835  | 0.616 | 0.492  | 0.463  | 0.496  | 0.549  |
| 0.815  | 0.651 | 0.492  | 0.486  | 0.485  | 0.532  |
| 0.911  | 0.598 | 0.458  | 0.42   | 0.429  | 0.497  |
| 0.697  | 0.65  | 0.504  | 0.464  | 0.468  | 0.505  |
| 0.589  | 0.264 | 0.427  | 0.336  | 0.299  | 0.306  |
| 0.469  | 0.525 | 0.464  | 0.314  | 0.321  | 0.314  |
| 0.252  | 0.273 | 0.414  | 0.304  | 0.278  | 0.29   |
| 0.325  | 0.482 | 0.413  | 0.323  | 0.285  | 0.313  |
| 0.427  | 0.409 | 0.376  | 0.432  | 0.435  | 0.443  |
| 0.423  | 0.437 | 0.439  | 0.446  | 0.441  | 0.428  |
| 0.4243 | 0.425 | 0.414  | 0.404  | 0.4363 | 0.426  |
| 0.423  | 0.428 | 0.434  | 0.436  | 0.433  | 0.434  |
| 0.538  | 0.526 | 0.531  | 0.574  | 0.527  | 0.528  |
| 0.57   | 0.522 | 0.567  | 0.581  | 0.533  | 0.51   |
| 0.588  | 0.522 | 0.525  | 0.561  | 0.566  | 0.573  |
| 0.54   | 0.521 | 0.539  | 0.55   | 0.559  | 0.577  |
| 0.906  | 0.905 | 0.839  | 0.769  | 0.717  | 0.664  |
| 0.858  | 0.778 | 0.838  | 0.709  | 0.721  | 0.669  |
| 1.037  | 0.806 | 0.81   | 0.707  | 0.719  | 0.6665 |
| 0.817  | 0.791 | 0.876  | 0.7283 | 0.719  | 0.6665 |
| 0.605  | 0.535 | 0.574  | 0.534  | 0.515  | 0.526  |
| 0.585  | 0.593 | 0.572  | 0.54   | 0.518  | 0.543  |
| 0.665  | 0.559 | 0.541  | 0.506  | 0.522  | 0.55   |
| 0.598  | 0.566 | 0.55   | 0.561  | 0.515  | 0.541  |
| 0.058  | 0.065 | 0.057  | 0.045  | 0.056  | 0.081  |
| 0.054  | 0.086 | 0.068  | 0.075  | 0.07   | 0.094  |
| 0.076  | 0.077 | 0.057  | 0.047  | 0.05   | 0.073  |

|        |        |        |        |        |        |
|--------|--------|--------|--------|--------|--------|
| 0.076  | 0.088  | 0.096  | 0.074  | 0.067  | 0.055  |
| 0.297  | 0.2995 | 0.2765 | 0.298  | 0.296  | 0.3055 |
| 0.3    | 0.2675 | 0.2805 | 0.2861 | 0.278  | 0.301  |
| 0.3205 | 0.303  | 0.295  | 0.2901 | 0.299  | 0.3135 |
| 0.318  | 0.315  | 0.288  | 0.2865 | 0.28   | 0.3035 |
| 0.4885 | 0.4865 | 0.4525 | 0.4675 | 0.42   | 0.4355 |
| 0.5075 | 0.426  | 0.4255 | 0.4195 | 0.4145 | 0.4385 |
| 0.527  | 0.4815 | 0.4745 | 0.489  | 0.4385 | 0.454  |
| 0.4995 | 0.481  | 0.4605 | 0.4595 | 0.4295 | 0.4445 |
| 0.3925 | 0.4005 | 0.3835 | 0.41   | 0.3675 | 0.429  |
| 0.3855 | 0.4071 | 0.369  | 0.3715 | 0.3755 | 0.4345 |
| 0.429  | 0.393  | 0.407  | 0.4435 | 0.3845 | 0.421  |
| 0.4135 | 0.42   | 0.4075 | 0.4295 | 0.4    | 0.429  |
| 0.682  | 0.7135 | 0.662  | 0.6685 | 0.6905 | 0.6975 |
| 0.723  | 0.6225 | 0.6188 | 0.6698 | 0.6905 | 0.7165 |
| 0.7865 | 0.694  | 0.671  | 0.7455 | 0.706  | 0.7295 |
| 0.7135 | 0.749  | 0.6625 | 0.6985 | 0.7305 | 0.7105 |
| 0.7385 | 0.739  | 0.7225 | 0.692  | 0.6655 | 0.6555 |
| 0.699  | 0.6165 | 0.6685 | 0.5605 | 0.6065 | 0.607  |
| 0.734  | 0.638  | 0.77   | 0.659  | 0.6795 | 0.713  |
| 0.724  | 0.8055 | 0.7765 | 0.5935 | 0.6675 | 0.665  |
| 0.5765 | 0.55   | 0.553  | 0.598  | 0.546  | 0.584  |
| 0.5825 | 0.5443 | 0.5534 | 0.5538 | 0.5185 | 0.5825 |
| 0.619  | 0.6055 | 0.594  | 0.5543 | 0.586  | 0.643  |
| 0.608  | 0.5465 | 0.5549 | 0.584  | 0.5985 | 0.5845 |
| 0.398  | 0.709  | 0.8595 | 0.8355 | 0.7185 | 0.734  |
| 0.429  | 0.6145 | 0.7445 | 0.613  | 0.6375 | 0.705  |
| 0.4755 | 0.6275 | 0.793  | 0.763  | 0.6085 | 0.6815 |
| 0.452  | 0.6495 | 0.871  | 0.7155 | 0.625  | 0.689  |
| 0.25   | 0.4345 | 0.6965 | 0.7405 | 0.7235 | 0.6985 |
| 0.2215 | 0.4085 | 0.6515 | 0.5895 | 0.686  | 0.692  |
| 0.264  | 0.376  | 0.6485 | 0.7315 | 0.676  | 0.6535 |
| 0.2835 | 0.4315 | 0.706  | 0.692  | 0.707  | 0.69   |
| 0.9335 | 0.7655 | 0.675  | 0.64   | 0.6615 | 0.73   |
| 0.914  | 0.6225 | 0.585  | 0.6234 | 0.6135 | 0.6625 |
| 1.0275 | 0.731  | 0.656  | 0.6495 | 0.6465 | 0.724  |

|        |        |        |        |        |        |
|--------|--------|--------|--------|--------|--------|
| 0.957  | 0.7645 | 0.672  | 0.6105 | 0.6365 | 0.6765 |
| 0.6295 | 0.6475 | 0.609  | 0.693  | 0.663  | 0.6485 |
| 0.613  | 0.6095 | 0.5715 | 0.6285 | 0.634  | 0.6285 |
| 0.6515 | 0.6525 | 0.6125 | 0.6995 | 0.6465 | 0.6535 |
| 0.6495 | 0.6695 | 0.5975 | 0.6785 | 0.6435 | 0.649  |
| 0.6815 | 0.739  | 0.759  | 0.79   | 0.742  | 0.804  |
| 0.7    | 0.6804 | 0.7646 | 0.7716 | 0.703  | 0.787  |
| 0.729  | 0.6665 | 0.7415 | 0.785  | 0.7295 | 0.7625 |
| 0.7075 | 0.745  | 0.7555 | 0.718  | 0.697  | 0.7245 |
| 0.6165 | 0.55   | 0.5615 | 0.613  | 0.585  | 0.61   |
| 0.46   | 0.4    | 0.4845 | 0.4305 | 0.549  | 0.5825 |
| 0.6135 | 0.5465 | 0.561  | 0.6105 | 0.617  | 0.532  |
| 0.6535 | 0.5895 | 0.581  | 0.5915 | 0.563  | 0.48   |
| 0.84   | 0.8095 | 0.7265 | 0.783  | 0.7785 | 0.857  |
| 0.8485 | 0.7135 | 0.6325 | 0.6615 | 0.825  | 0.8505 |
| 0.9395 | 0.806  | 0.7775 | 0.832  | 0.8095 | 0.872  |
| 0.845  | 0.8605 | 0.7495 | 0.7875 | 0.796  | 0.886  |
| 0.211  | 0.2265 | 0.242  | 0.2415 | 0.2335 | 0.252  |
| 0.2055 | 0.198  | 0.22   | 0.2095 | 0.239  | 0.2585 |
| 0.2285 | 0.221  | 0.253  | 0.2565 | 0.24   | 0.2465 |
| 0.211  | 0.2345 | 0.2515 | 0.239  | 0.232  | 0.2455 |
| 0.4785 | 0.3075 | 0.2265 | 0.2185 | 0.2305 | 0.294  |
| 0.5115 | 0.2455 | 0.207  | 0.2206 | 0.2225 | 0.292  |
| 0.526  | 0.304  | 0.24   | 0.2335 | 0.234  | 0.2895 |
| 0.5615 | 0.349  | 0.2475 | 0.2325 | 0.251  | 0.285  |
| 0.935  | 0.748  | 0.55   | 0.561  | 0.58   | 0.683  |
| 0.952  | 0.634  | 0.515  | 0.515  | 0.594  | 0.6725 |
| 1.06   | 0.732  | 0.58   | 0.6035 | 0.592  | 0.6795 |
| 1.028  | 0.8305 | 0.6065 | 0.588  | 0.6195 | 0.68   |
| 0.6455 | 0.528  | 0.224  | 0.285  | 0.319  | 0.3045 |
| 0.5925 | 0.7115 | 0.3355 | 0.287  | 0.2725 | 0.2775 |
| 0.5385 | 0.435  | 0.3695 | 0.2935 | 0.326  | 0.3395 |
| 0.5655 | 0.519  | 0.4    | 0.3175 | 0.336  | 0.3405 |
| 0.4495 | 0.453  | 0.4475 | 0.4565 | 0.46   | 0.4365 |
| 0.4425 | 0.4596 | 0.3855 | 0.4571 | 0.45   | 0.4295 |
| 0.466  | 0.4545 | 0.4315 | 0.4545 | 0.4575 | 0.417  |
| 0.4465 | 0.454  | 0.439  | 0.449  | 0.45   | 0.411  |
| 0.5725 | 0.6    | 0.5655 | 0.5885 | 0.5905 | 0.563  |
| 0.555  | 0.5545 | 0.536  | 0.554  | 0.571  | 0.5585 |

|        |        |        |        |        |        |
|--------|--------|--------|--------|--------|--------|
| 0.6145 | 0.6005 | 0.5865 | 0.62   | 0.5845 | 0.5745 |
| 0.5765 | 0.6085 | 0.565  | 0.5785 | 0.571  | 0.5785 |
| 0.9205 | 0.93   | 0.777  | 0.715  | 0.763  | 0.8255 |
| 0.9385 | 0.759  | 0.67   | 0.565  | 0.7455 | 0.794  |
| 0.9595 | 0.9585 | 0.833  | 0.802  | 0.8085 | 0.8295 |
| 0.9865 | 0.997  | 0.782  | 0.738  | 0.7585 | 0.7945 |
| 0.6475 | 0.704  | 0.6395 | 0.6715 | 0.661  | 0.656  |
| 0.6485 | 0.669  | 0.6155 | 0.616  | 0.656  | 0.656  |
| 0.7065 | 0.7095 | 0.6645 | 0.6805 | 0.6555 | 0.654  |
| 0.6965 | 0.726  | 0.6545 | 0.678  | 0.6805 | 0.643  |
| 0.0595 | 0.0675 | 0.0565 | 0.056  | 0.0535 | 0.0795 |
| 0.067  | 0.0505 | 0.0505 | 0.0686 | 0.0595 | 0.0935 |
| 0.0865 | 0.0625 | 0.067  | 0.0705 | 0.0595 | 0.074  |
| 0.078  | 0.0855 | 0.0745 | 0.0695 | 0.063  | 0.0775 |
| 0.258  | 0.266  | 0.2625 | 0.281  | 0.266  | 0.274  |
| 0.254  | 0.2796 | 0.2815 | 0.283  | 0.2655 | 0.273  |
| 0.2635 | 0.2725 | 0.259  | 0.2772 | 0.2565 | 0.266  |
| 0.271  | 0.2705 | 0.272  | 0.2725 | 0.2595 | 0.262  |
| 0.48   | 0.4315 | 0.396  | 0.4135 | 0.3855 | 0.4225 |
| 0.4755 | 0.4065 | 0.4165 | 0.421  | 0.382  | 0.429  |
| 0.4915 | 0.436  | 0.3855 | 0.412  | 0.3775 | 0.4225 |
| 0.47   | 0.421  | 0.398  | 0.41   | 0.3785 | 0.4115 |
| 0.394  | 0.373  | 0.36   | 0.3635 | 0.3645 | 0.393  |
| 0.409  | 0.344  | 0.3945 | 0.376  | 0.3605 | 0.3815 |
| 0.415  | 0.3505 | 0.3355 | 0.3455 | 0.335  | 0.358  |
| 0.3915 | 0.343  | 0.353  | 0.343  | 0.341  | 0.3585 |
| 0.69   | 0.674  | 0.6505 | 0.6565 | 0.6875 | 0.7265 |
| 0.6905 | 0.6915 | 0.7255 | 0.6985 | 0.6665 | 0.738  |
| 0.7105 | 0.6575 | 0.6625 | 0.664  | 0.677  | 0.7185 |
| 0.6915 | 0.649  | 0.675  | 0.6685 | 0.6735 | 0.7125 |
| 0.774  | 0.752  | 0.688  | 0.6725 | 0.6975 | 0.675  |
| 0.64   | 0.683  | 0.824  | 0.6855 | 0.7195 | 0.7115 |
| 0.816  | 0.684  | 0.707  | 0.678  | 0.6855 | 0.6015 |
| 0.7265 | 0.669  | 0.7325 | 0.6395 | 0.693  | 0.652  |
| 0.6445 | 0.626  | 0.61   | 0.574  | 0.5015 | 0.5655 |
| 0.5465 | 0.5783 | 0.5645 | 0.586  | 0.566  | 0.559  |

|        |        |        |        |        |        |
|--------|--------|--------|--------|--------|--------|
| 0.5925 | 0.5475 | 0.5585 | 0.499  | 0.509  | 0.4875 |
| 0.587  | 0.5585 | 0.5995 | 0.5005 | 0.515  | 0.5095 |
| 0.641  | 0.8855 | 0.971  | 0.9345 | 0.774  | 0.8135 |
| 0.5075 | 0.7695 | 1.0615 | 0.9615 | 0.7745 | 0.9005 |
| 0.6735 | 0.7485 | 0.8245 | 0.7665 | 0.674  | 0.649  |
| 0.51   | 0.803  | 0.8835 | 0.781  | 0.7265 | 0.698  |
| 0.3765 | 0.6255 | 0.84   | 0.919  | 0.8555 | 0.9305 |
| 0.2725 | 0.5595 | 0.9335 | 0.9205 | 0.8705 | 0.9245 |
| 0.3565 | 0.5525 | 0.7495 | 0.8285 | 0.784  | 0.826  |
| 0.3095 | 0.5905 | 0.8265 | 0.808  | 0.788  | 0.839  |
| 1.0005 | 0.8605 | 0.6992 | 0.676  | 0.647  | 0.7035 |
| 0.9195 | 0.775  | 0.727  | 0.6885 | 0.6205 | 0.7045 |
| 1.086  | 0.792  | 0.64   | 0.6675 | 0.629  | 0.63   |
| 0.9725 | 0.786  | 0.6795 | 0.6615 | 0.6515 | 0.642  |
| 0.626  | 0.6225 | 0.638  | 0.649  | 0.61   | 0.626  |
| 0.615  | 0.6589 | 0.6615 | 0.658  | 0.5905 | 0.6315 |
| 0.6335 | 0.625  | 0.622  | 0.651  | 0.605  | 0.6335 |
| 0.609  | 0.617  | 0.641  | 0.65   | 0.615  | 0.6255 |
| 0.5355 | 0.5865 | 0.58   | 0.5915 | 0.594  | 0.6555 |
| 0.5265 | 0.547  | 0.658  | 0.6155 | 0.5535 | 0.665  |
| 0.576  | 0.541  | 0.5685 | 0.6205 | 0.576  | 0.622  |
| 0.592  | 0.5895 | 0.645  | 0.578  | 0.585  | 0.6165 |
| 0.64   | 0.54   | 0.5945 | 0.6117 | 0.5965 | 0.604  |
| 0.5375 | 0.6458 | 0.6425 | 0.598  | 0.6155 | 0.5728 |
| 0.601  | 0.6475 | 0.612  | 0.6225 | 0.597  | 0.5938 |
| 0.6895 | 0.641  | 0.619  | 0.6495 | 0.6175 | 0.5918 |
| 0.7855 | 0.6985 | 0.669  | 0.7005 | 0.638  | 0.7785 |
| 0.7835 | 0.662  | 0.7515 | 0.72   | 0.623  | 0.786  |
| 0.812  | 0.7045 | 0.688  | 0.721  | 0.6505 | 0.757  |
| 0.775  | 0.714  | 0.715  | 0.737  | 0.666  | 0.7955 |
| 0.193  | 0.2105 | 0.22   | 0.2195 | 0.208  | 0.226  |
| 0.18   | 0.1925 | 0.2395 | 0.225  | 0.2005 | 0.224  |
| 0.2    | 0.2005 | 0.212  | 0.214  | 0.197  | 0.214  |
| 0.1875 | 0.1975 | 0.223  | 0.212  | 0.2    | 0.218  |
| 0.5975 | 0.353  | 0.238  | 0.2245 | 0.244  | 0.2975 |
| 0.5285 | 0.323  | 0.262  | 0.234  | 0.245  | 0.309  |
| 0.6575 | 0.35   | 0.2245 | 0.2115 | 0.2275 | 0.2815 |
| 0.6115 | 0.3445 | 0.2405 | 0.229  | 0.242  | 0.2595 |
| 0.946  | 0.6265 | 0.448  | 0.4715 | 0.427  | 0.559  |

|        |        |        |        |        |        |
|--------|--------|--------|--------|--------|--------|
| 0.8575 | 0.5785 | 0.506  | 0.499  | 0.4415 | 0.5735 |
| 0.8505 | 0.593  | 0.4095 | 0.4515 | 0.392  | 0.4975 |
| 0.8115 | 0.5955 | 0.468  | 0.4385 | 0.381  | 0.495  |
| 0.5175 | 0.3745 | 0.4305 | 0.3025 | 0.309  | 0.3015 |
| 0.541  | 0.6095 | 0.3625 | 0.3275 | 0.3325 | 0.28   |
| 0.3195 | 0.3375 | 0.448  | 0.2815 | 0.335  | 0.306  |
| 0.334  | 0.544  | 0.41   | 0.34   | 0.3185 | 0.2935 |
| 0.394  | 0.3995 | 0.4215 | 0.3975 | 0.425  | 0.4275 |
| 0.377  | 0.3895 | 0.4535 | 0.4115 | 0.414  | 0.417  |
| 0.403  | 0.398  | 0.397  | 0.4015 | 0.411  | 0.4075 |
| 0.3835 | 0.3815 | 0.4315 | 0.399  | 0.408  | 0.4005 |
| 0.5455 | 0.5545 | 0.5435 | 0.5345 | 0.535  | 0.557  |
| 0.544  | 0.537  | 0.578  | 0.547  | 0.526  | 0.5705 |
| 0.5595 | 0.5455 | 0.549  | 0.543  | 0.5315 | 0.546  |
| 0.5405 | 0.5305 | 0.547  | 0.539  | 0.53   | 0.561  |
| 0.808  | 0.866  | 0.675  | 0.6685 | 0.6603 | 0.6875 |
| 0.7745 | 0.965  | 0.8025 | 0.6935 | 0.624  | 0.6774 |
| 0.8665 | 0.885  | 0.6845 | 0.69   | 0.6667 | 0.699  |
| 0.842  | 0.868  | 0.74   | 0.6805 | 0.631  | 0.6994 |
| 0.6225 | 0.613  | 0.5445 | 0.581  | 0.5825 | 0.599  |
| 0.5845 | 0.602  | 0.58   | 0.5955 | 0.578  | 0.598  |
| 0.627  | 0.6015 | 0.5275 | 0.556  | 0.5465 | 0.5765 |
| 0.59   | 0.601  | 0.5355 | 0.562  | 0.5665 | 0.5725 |
| 0.0645 | 0.063  | 0.057  | 0.0525 | 0.0615 | 0.0925 |
| 0.0475 | 0.067  | 0.0835 | 0.06   | 0.053  | 0.0955 |
| 0.082  | 0.064  | 0.05   | 0.0525 | 0.0495 | 0.075  |
| 0.068  | 0.059  | 0.0635 | 0.058  | 0.0525 | 0.072  |
